# Supplementary material for: Genome-wide association study of brain amyloid deposition as measured by Pittsburgh Compound-B (PiB)-PET imaging
Source: PubMed Central journal article supplement (PMC6219464; doi:10.1038/s41380-018-0246-7), 2018-10-25
Supplement: NIHMS1502310-supplement-4.pdf [file NIHMS1502310-supplement-4.pdf]

**Table S7. The detailed eQTL and SMR results of LD SNPs  $R^2 \geq 0.8$  with the 16 top SNPs including both *APOE* and non-*APOE* loci**

**#sentinelSNP:** top SNPs of each locus from Table 2

**#Gene:** *cis*-eQTL genes with the test SNP

**#Probe\_bp:** gene location

**#testSNP:** the test SNP that is in LD with the sentinel SNP

**#R2:** LD R-square

**#testSNP\_bp:** the test SNP location

**#A1:** allele1

**#A2:** allele2

**#Freq:** frequency of allele1

**#p\_GWAS:** p-value from the meta-analysis of GWAS

**#p\_eQTL:** the *cis*-eQTL p-value between the test SNP and the gene in the corresponding tissue

**#p\_SMR:** the SMR p-value between the test SNP and the gene in the corresponding tissue

| sentinelSNP | Tissue                               | Chr | Gene                | Probe_bp | testSNP  | R2     | testSNP_bp | A1 | A2 | Freq | p_GWAS   | p_eQTL   | p_SMR    |
|-------------|--------------------------------------|-----|---------------------|----------|----------|--------|------------|----|----|------|----------|----------|----------|
| rs429358    | Brain_Amygdala                       | 19  | <i>CTB-171A8.1</i>  | 45178765 | rs429358 | 1.0000 | 45411941   | C  | T  | 0.22 | 9.09E-30 | 1.96E-02 | 2.25E-02 |
| rs429358    | Brain_Amygdala                       | 19  | <i>PPP1R37</i>      | 45622796 | rs429358 | 1.0000 | 45411941   | C  | T  | 0.22 | 9.09E-30 | 2.14E-02 | 2.44E-02 |
| rs429358    | Brain_Amygdala                       | 19  | <i>GIPR</i>         | 46179242 | rs429358 | 1.0000 | 45411941   | C  | T  | 0.22 | 9.09E-30 | 4.89E-02 | 5.27E-02 |
| rs429358    | Brain_Anterior_cingulate_cortex_BA24 | 19  | <i>ZNF229</i>       | 44937225 | rs429358 | 1.0000 | 45411941   | C  | T  | 0.22 | 9.09E-30 | 3.82E-02 | 4.18E-02 |
| rs429358    | Brain_Anterior_cingulate_cortex_BA24 | 19  | <i>ZNF180</i>       | 44992215 | rs429358 | 1.0000 | 45411941   | C  | T  | 0.22 | 9.09E-30 | 2.55E-02 | 2.87E-02 |
| rs429358    | Brain_Anterior_cingulate_cortex_BA24 | 19  | <i>BCAM</i>         | 45318499 | rs429358 | 1.0000 | 45411941   | C  | T  | 0.22 | 9.09E-30 | 4.94E-02 | 5.32E-02 |
| rs429358    | Brain_Anterior_cingulate_cortex_BA24 | 19  | <i>CTB-129P6.11</i> | 45455282 | rs429358 | 1.0000 | 45411941   | C  | T  | 0.22 | 9.09E-30 | 3.43E-02 | 3.78E-02 |
| rs429358    | Brain_Anterior_cingulate_cortex_BA24 | 19  | <i>CLASRP</i>       | 45558256 | rs429358 | 1.0000 | 45411941   | C  | T  | 0.22 | 9.09E-30 | 1.55E-02 | 1.82E-02 |
| rs429358    | Brain_Anterior_cingulate_cortex_BA24 | 19  | <i>SYMPK</i>        | 46342608 | rs429358 | 1.0000 | 45411941   | C  | T  | 0.22 | 9.09E-30 | 1.33E-02 | 1.59E-02 |
| rs429358    | Brain_Caudate_basal_ganglia          | 19  | <i>AC084219.3</i>   | 44601274 | rs429358 | 1.0000 | 45411941   | C  | T  | 0.22 | 9.09E-30 | 4.21E-02 | 4.58E-02 |
| rs429358    | Brain_Caudate_basal_ganglia          | 19  | <i>ZNF226</i>       | 44675880 | rs429358 | 1.0000 | 45411941   | C  | T  | 0.22 | 9.09E-30 | 2.62E-02 | 2.95E-02 |
| rs429358    | Brain_Cerebellar_Hemisphere          | 19  | <i>ZNF227</i>       | 44726560 | rs429358 | 1.0000 | 45411941   | C  | T  | 0.22 | 9.09E-30 | 3.49E-03 | 4.82E-03 |
| rs429358    | Brain_Cerebellar_Hemisphere          | 19  | <i>ZNF285B</i>      | 44974651 | rs429358 | 1.0000 | 45411941   | C  | T  | 0.22 | 9.09E-30 | 2.01E-02 | 2.31E-02 |
| rs429358    | Brain_Cerebellar_Hemisphere          | 19  | <i>AC006132.1</i>   | 46145425 | rs429358 | 1.0000 | 45411941   | C  | T  | 0.22 | 9.09E-30 | 3.90E-02 | 4.26E-02 |
| rs429358    | Brain_Cerebellum                     | 19  | <i>AC084219.4</i>   | 44613457 | rs429358 | 1.0000 | 45411941   | C  | T  | 0.22 | 9.09E-30 | 2.02E-02 | 2.32E-02 |
| rs429358    | Brain_Cerebellum                     | 19  | <i>ZNF225</i>       | 44626710 | rs429358 | 1.0000 | 45411941   | C  | T  | 0.22 | 9.09E-30 | 4.48E-04 | 8.47E-04 |
| rs429358    | Brain_Cerebellum                     | 19  | <i>ZNF226</i>       | 44675880 | rs429358 | 1.0000 | 45411941   | C  | T  | 0.22 | 9.09E-30 | 1.57E-02 | 1.85E-02 |
| rs429358    | Brain_Cerebellum                     | 19  | <i>ZNF227</i>       | 44726560 | rs429358 | 1.0000 | 45411941   | C  | T  | 0.22 | 9.09E-30 | 6.97E-04 | 1.22E-03 |
| rs429358    | Brain_Cerebellum                     | 19  | <i>ZNF235</i>       | 44771040 | rs429358 | 1.0000 | 45411941   | C  | T  | 0.22 | 9.09E-30 | 2.66E-02 | 2.99E-02 |
| rs429358    | Brain_Cerebellum                     | 19  | <i>CTC-512J12.7</i> | 44794649 | rs429358 | 1.0000 | 45411941   | C  | T  | 0.22 | 9.09E-30 | 3.43E-02 | 3.78E-02 |
| rs429358    | Brain_Cerebellum                     | 19  | <i>ZNF112</i>       | 44851042 | rs429358 | 1.0000 | 45411941   | C  | T  | 0.22 | 9.09E-30 | 7.76E-03 | 9.76E-03 |
| rs429358    | Brain_Cerebellum                     | 19  | <i>TOMM40</i>       | 45400386 | rs429358 | 1.0000 | 45411941   | C  | T  | 0.22 | 9.09E-30 | 1.91E-02 | 2.21E-02 |
| rs429358    | Brain_Cerebellum                     | 19  | <i>ZNF296</i>       | 45577262 | rs429358 | 1.0000 | 45411941   | C  | T  | 0.22 | 9.09E-30 | 2.19E-02 | 2.49E-02 |
| rs429358    | Brain_Cortex                         | 19  | <i>ZNF284</i>       | 44585031 | rs429358 | 1.0000 | 45411941   | C  | T  | 0.22 | 9.09E-30 | 3.88E-02 | 4.24E-02 |

|            |                                       |    |                   |           |            |        |           |   |   |      |          |          |          |
|------------|---------------------------------------|----|-------------------|-----------|------------|--------|-----------|---|---|------|----------|----------|----------|
| rs429358   | Brain_Cortex                          | 19 | <i>APOE</i>       | 45410830  | rs429358   | 1.0000 | 45411941  | C | T | 0.22 | 9.09E-30 | 2.15E-02 | 2.46E-02 |
| rs429358   | Brain_Cortex                          | 19 | <i>CLASRP</i>     | 45558256  | rs429358   | 1.0000 | 45411941  | C | T | 0.22 | 9.09E-30 | 4.21E-02 | 4.58E-02 |
| rs429358   | Brain_Cortex                          | 19 | <i>FOSB</i>       | 45974845  | rs429358   | 1.0000 | 45411941  | C | T | 0.22 | 9.09E-30 | 4.17E-02 | 4.54E-02 |
| rs429358   | Brain_Frontal_Cortex_BA9              | 19 | <i>ZNF235</i>     | 44771040  | rs429358   | 1.0000 | 45411941  | C | T | 0.22 | 9.09E-30 | 1.04E-02 | 1.26E-02 |
| rs429358   | Brain_Frontal_Cortex_BA9              | 19 | <i>FOSB</i>       | 45974845  | rs429358   | 1.0000 | 45411941  | C | T | 0.22 | 9.09E-30 | 4.05E-02 | 4.42E-02 |
| rs429358   | Brain_Hippocampus                     | 19 | <i>ZNF284</i>     | 44585031  | rs429358   | 1.0000 | 45411941  | C | T | 0.22 | 9.09E-30 | 2.89E-03 | 4.09E-03 |
| rs429358   | Brain_Hippocampus                     | 19 | <i>SNRPD2</i>     | 46193179  | rs429358   | 1.0000 | 45411941  | C | T | 0.22 | 9.09E-30 | 4.26E-02 | 4.64E-02 |
| rs429358   | Brain_Hippocampus                     | 19 | <i>DMPK</i>       | 46279437  | rs429358   | 1.0000 | 45411941  | C | T | 0.22 | 9.09E-30 | 3.61E-02 | 3.97E-02 |
| rs429358   | Brain_Hypothalamus                    | 19 | <i>ZNF224</i>     | 44601935  | rs429358   | 1.0000 | 45411941  | C | T | 0.22 | 9.09E-30 | 3.56E-02 | 3.92E-02 |
| rs429358   | Brain_Hypothalamus                    | 19 | <i>ZNF180</i>     | 44992215  | rs429358   | 1.0000 | 45411941  | C | T | 0.22 | 9.09E-30 | 4.69E-02 | 5.07E-02 |
| rs429358   | Brain_Hypothalamus                    | 19 | <i>OPA3</i>       | 46068077  | rs429358   | 1.0000 | 45411941  | C | T | 0.22 | 9.09E-30 | 1.85E-02 | 2.14E-02 |
| rs429358   | Brain_Nucleus_accumbens_basal_ganglia | 19 | <i>ZNF155</i>     | 44486530  | rs429358   | 1.0000 | 45411941  | C | T | 0.22 | 9.09E-30 | 6.44E-03 | 8.26E-03 |
| rs429358   | Brain_Nucleus_accumbens_basal_ganglia | 19 | <i>ZNF225</i>     | 44626710  | rs429358   | 1.0000 | 45411941  | C | T | 0.22 | 9.09E-30 | 3.44E-03 | 4.75E-03 |
| rs429358   | Brain_Nucleus_accumbens_basal_ganglia | 19 | <i>ZNF296</i>     | 45577262  | rs429358   | 1.0000 | 45411941  | C | T | 0.22 | 9.09E-30 | 5.07E-03 | 6.68E-03 |
| rs429358   | Brain_Nucleus_accumbens_basal_ganglia | 19 | <i>ERCC1</i>      | 45946338  | rs429358   | 1.0000 | 45411941  | C | T | 0.22 | 9.09E-30 | 3.64E-02 | 4.00E-02 |
| rs429358   | Brain_Nucleus_accumbens_basal_ganglia | 19 | <i>FOSB</i>       | 45974845  | rs429358   | 1.0000 | 45411941  | C | T | 0.22 | 9.09E-30 | 1.19E-02 | 1.44E-02 |
| rs429358   | Brain_Putamen_basal_ganglia           | 19 | <i>ZNF222</i>     | 44533379  | rs429358   | 1.0000 | 45411941  | C | T | 0.22 | 9.09E-30 | 9.77E-04 | 1.62E-03 |
| rs429358   | Brain_Spinal_cord_cervical_c-1        | 19 | <i>SYMPK</i>      | 46342608  | rs429358   | 1.0000 | 45411941  | C | T | 0.22 | 9.09E-30 | 2.28E-02 | 2.59E-02 |
| rs429358   | Brain_Spinal_cord_cervical_c-1        | 19 | <i>MYPOP</i>      | 46399570  | rs429358   | 1.0000 | 45411941  | C | T | 0.22 | 9.09E-30 | 4.86E-02 | 5.24E-02 |
| rs429358   | Brain_Substantia_nigra                | 19 | <i>ZNF285B</i>    | 44974651  | rs429358   | 1.0000 | 45411941  | C | T | 0.22 | 9.09E-30 | 3.06E-02 | 3.41E-02 |
| rs429358   | Brain_Substantia_nigra                | 19 | <i>TOMM40</i>     | 45400386  | rs429358   | 1.0000 | 45411941  | C | T | 0.22 | 9.09E-30 | 3.74E-02 | 4.10E-02 |
| rs429358   | Brain_Substantia_nigra                | 19 | <i>CD3EAP</i>     | 45911745  | rs429358   | 1.0000 | 45411941  | C | T | 0.22 | 9.09E-30 | 3.55E-03 | 4.89E-03 |
| rs429358   | Brain_Substantia_nigra                | 19 | <i>RTN2</i>       | 45994433  | rs429358   | 1.0000 | 45411941  | C | T | 0.22 | 9.09E-30 | 3.97E-02 | 4.34E-02 |
| rs429358   | Brain_Substantia_nigra                | 19 | <i>OPA3</i>       | 46068077  | rs429358   | 1.0000 | 45411941  | C | T | 0.22 | 9.09E-30 | 2.95E-02 | 3.28E-02 |
| rs429358   | Brain_Substantia_nigra                | 19 | <i>AC006132.1</i> | 46145425  | rs429358   | 1.0000 | 45411941  | C | T | 0.22 | 9.09E-30 | 9.01E-04 | 1.51E-03 |
| rs429358   | Brain_Substantia_nigra                | 19 | <i>GIPR</i>       | 46179242  | rs429358   | 1.0000 | 45411941  | C | T | 0.22 | 9.09E-30 | 8.16E-03 | 1.02E-02 |
| rs429358   | Whole_Blood                           | 19 | <i>CD3EAP</i>     | 45911745  | rs429358   | 1.0000 | 45411941  | C | T | 0.22 | 9.09E-30 | 2.17E-03 | 3.19E-03 |
| rs429358   | Whole_Blood                           | 19 | <i>GPR4</i>       | 46098016  | rs429358   | 1.0000 | 45411941  | C | T | 0.22 | 9.09E-30 | 6.11E-03 | 7.89E-03 |
| rs13260032 | Brain_Amygdala                        | 8  | <i>ADCY8</i>      | 131923609 | rs12546678 | 0.8954 | 132405080 | A | C | 0.42 | 9.70E-06 | 3.89E-03 | 1.86E-02 |
| rs13260032 | Brain_Amygdala                        | 8  | <i>ADCY8</i>      | 131923609 | rs28544439 | 0.8954 | 132405308 | A | C | 0.42 | 3.11E-06 | 5.09E-03 | 1.98E-02 |
| rs13260032 | Brain_Amygdala                        | 8  | <i>ADCY8</i>      | 131923609 | rs1900932  | 0.8954 | 132405894 | A | G | 0.43 | 2.08E-06 | 4.47E-03 | 1.79E-02 |
| rs13260032 | Brain_Amygdala                        | 8  | <i>ADCY8</i>      | 131923609 | rs891429   | 0.8014 | 132406960 | C | T | 0.46 | 2.44E-06 | 8.99E-03 | 2.78E-02 |
| rs13260032 | Brain_Amygdala                        | 8  | <i>ADCY8</i>      | 131923609 | rs10956599 | 0.8954 | 132408083 | T | C | 0.42 | 2.04E-06 | 5.96E-03 | 2.10E-02 |
| rs13260032 | Brain_Amygdala                        | 8  | <i>ADCY8</i>      | 131923609 | rs11774542 | 0.8269 | 132416893 | A | G | 0.45 | 1.75E-04 | 2.39E-02 | 9.19E-02 |
| rs13260032 | Brain_Amygdala                        | 8  | <i>ADCY8</i>      | 131923609 | rs10956600 | 0.8576 | 132418520 | C | A | 0.47 | 9.59E-05 | 1.51E-02 | 6.75E-02 |
| rs13260032 | Brain_Amygdala                        | 8  | <i>ADCY8</i>      | 131923609 | rs1430324  | 0.8497 | 132419109 | T | C | 0.47 | 9.59E-05 | 1.51E-02 | 6.75E-02 |
| rs13260032 | Brain_Amygdala                        | 8  | <i>ADCY8</i>      | 131923609 | rs1430325  | 0.8303 | 132421240 | T | A | 0.45 | 3.99E-04 | 2.37E-02 | 1.04E-01 |
| rs13260032 | Brain_Amygdala                        | 8  | <i>ADCY8</i>      | 131923609 | rs1375602  | 0.8497 | 132422143 | T | C | 0.45 | 1.18E-04 | 3.19E-02 | 9.27E-02 |
| rs13260032 | Brain_Amygdala                        | 8  | <i>ADCY8</i>      | 131923609 | rs715985   | 0.8576 | 132423889 | G | A | 0.47 | 9.61E-05 | 1.51E-02 | 6.77E-02 |
| rs13260032 | Brain_Amygdala                        | 8  | <i>ADCY8</i>      | 131923609 | rs6470972  | 0.8303 | 132424471 | T | C | 0.47 | 2.22E-04 | 1.05E-02 | 7.17E-02 |

|            |                          |   |       |           |            |        |           |   |   |      |          |          |          |
|------------|--------------------------|---|-------|-----------|------------|--------|-----------|---|---|------|----------|----------|----------|
| rs13260032 | Brain_Amygdala           | 8 | ADCY8 | 131923609 | rs1449471  | 0.8303 | 132424978 | A | G | 0.47 | 2.51E-04 | 1.05E-02 | 7.23E-02 |
| rs13260032 | Brain_Amygdala           | 8 | ADCY8 | 131923609 | rs1449472  | 0.8226 | 132425379 | T | C | 0.45 | 3.13E-04 | 2.39E-02 | 9.65E-02 |
| rs13260032 | Brain_Amygdala           | 8 | ADCY8 | 131923609 | rs9918761  | 0.8303 | 132425906 | A | T | 0.47 | 2.58E-04 | 1.05E-02 | 7.26E-02 |
| rs13260032 | Brain_Amygdala           | 8 | ADCY8 | 131923609 | rs9297822  | 0.8621 | 132428061 | G | T | 0.47 | 8.54E-05 | 1.56E-02 | 6.77E-02 |
| rs13260032 | Brain_Amygdala           | 8 | ADCY8 | 131923609 | rs1430323  | 0.8541 | 132428314 | T | C | 0.47 | 6.09E-05 | 1.19E-02 | 5.86E-02 |
| rs13260032 | Brain_Amygdala           | 8 | ADCY8 | 131923609 | rs1430322  | 0.8346 | 132429002 | A | G | 0.45 | 2.42E-04 | 2.39E-02 | 9.53E-02 |
| rs13260032 | Brain_Amygdala           | 8 | ADCY8 | 131923609 | rs1346816  | 0.8626 | 132430495 | C | T | 0.47 | 9.47E-05 | 1.51E-02 | 6.95E-02 |
| rs13260032 | Brain_Amygdala           | 8 | ADCY8 | 131923609 | rs6997462  | 0.8626 | 132431123 | G | A | 0.46 | 3.64E-04 | 1.53E-02 | 9.73E-02 |
| rs13260032 | Brain_Amygdala           | 8 | ADCY8 | 131923609 | rs1562702  | 0.8626 | 132431713 | C | T | 0.47 | 1.38E-04 | 1.51E-02 | 7.52E-02 |
| rs13260032 | Brain_Amygdala           | 8 | ADCY8 | 131923609 | rs7013917  | 0.8546 | 132434320 | C | A | 0.46 | 4.10E-06 | 1.53E-02 | 4.01E-02 |
| rs13260032 | Brain_Amygdala           | 8 | ADCY8 | 131923609 | rs1346815  | 0.8546 | 132434697 | A | G | 0.46 | 4.15E-06 | 1.53E-02 | 4.01E-02 |
| rs13260032 | Brain_Amygdala           | 8 | ADCY8 | 131923609 | rs1367279  | 0.8626 | 132435197 | G | T | 0.46 | 5.92E-04 | 2.16E-02 | 1.19E-01 |
| rs13260032 | Brain_Amygdala           | 8 | ADCY8 | 131923609 | rs1430320  | 0.8546 | 132437383 | C | G | 0.47 | 1.19E-04 | 1.51E-02 | 7.24E-02 |
| rs13260032 | Brain_Amygdala           | 8 | ADCY8 | 131923609 | rs1430319  | 0.8626 | 132437577 | C | T | 0.46 | 2.78E-04 | 1.43E-02 | 8.74E-02 |
| rs13260032 | Brain_Amygdala           | 8 | ADCY8 | 131923609 | rs1367278  | 0.8592 | 132437635 | G | A | 0.47 | 1.10E-04 | 1.51E-02 | 7.12E-02 |
| rs13260032 | Brain_Amygdala           | 8 | ADCY8 | 131923609 | rs2195626  | 0.8626 | 132437929 | A | G | 0.47 | 1.09E-04 | 1.51E-02 | 7.09E-02 |
| rs13260032 | Brain_Amygdala           | 8 | ADCY8 | 131923609 | rs10956601 | 0.8660 | 132439003 | G | T | 0.46 | 2.77E-04 | 1.47E-02 | 8.76E-02 |
| rs13260032 | Brain_Amygdala           | 8 | ADCY8 | 131923609 | rs6470975  | 0.8626 | 132439128 | C | T | 0.46 | 3.99E-04 | 1.47E-02 | 9.65E-02 |
| rs13260032 | Brain_Amygdala           | 8 | ADCY8 | 131923609 | rs10429315 | 0.8660 | 132439631 | G | T | 0.47 | 1.14E-04 | 1.66E-02 | 7.42E-02 |
| rs13260032 | Brain_Amygdala           | 8 | ADCY8 | 131923609 | rs1430317  | 0.8581 | 132441048 | C | T | 0.46 | 2.81E-04 | 1.47E-02 | 8.81E-02 |
| rs13260032 | Brain_Amygdala           | 8 | ADCY8 | 131923609 | rs1430316  | 0.8660 | 132443583 | C | T | 0.46 | 4.56E-04 | 1.53E-02 | 1.02E-01 |
| rs13260032 | Brain_Amygdala           | 8 | ADCY8 | 131923609 | rs7016765  | 0.8581 | 132446857 | A | C | 0.47 | 1.10E-04 | 9.18E-03 | 6.11E-02 |
| rs13260032 | Brain_Amygdala           | 8 | ADCY8 | 131923609 | rs7016957  | 0.8581 | 132447031 | T | C | 0.47 | 1.20E-04 | 2.28E-02 | 8.33E-02 |
| rs13260032 | Brain_Amygdala           | 8 | ADCY8 | 131923609 | rs1119003  | 0.8660 | 132447848 | A | T | 0.46 | 2.80E-04 | 1.45E-02 | 8.78E-02 |
| rs13260032 | Brain_Amygdala           | 8 | ADCY8 | 131923609 | rs1119002  | 0.8660 | 132447890 | G | A | 0.46 | 2.80E-04 | 1.60E-02 | 9.01E-02 |
| rs13260032 | Brain_Amygdala           | 8 | ADCY8 | 131923609 | rs13260032 | 1.0000 | 132451455 | C | A | 0.43 | 4.87E-07 | 1.54E-02 | 3.27E-02 |
| rs13260032 | Brain_Amygdala           | 8 | ADCY8 | 131923609 | rs1430315  | 0.8695 | 132452764 | A | G | 0.47 | 1.20E-04 | 1.66E-02 | 7.47E-02 |
| rs13260032 | Brain_Amygdala           | 8 | ADCY8 | 131923609 | rs1449473  | 0.8615 | 132454864 | A | C | 0.46 | 4.54E-04 | 1.47E-02 | 1.00E-01 |
| rs13260032 | Brain_Amygdala           | 8 | ADCY8 | 131923609 | rs1449474  | 0.8615 | 132454897 | A | G | 0.46 | 2.74E-04 | 1.47E-02 | 8.76E-02 |
| rs13260032 | Brain_Amygdala           | 8 | ADCY8 | 131923609 | rs1346812  | 0.8615 | 132455103 | C | G | 0.47 | 1.10E-04 | 1.66E-02 | 7.35E-02 |
| rs13260032 | Brain_Amygdala           | 8 | ADCY8 | 131923609 | rs1346811  | 0.8615 | 132455575 | T | A | 0.46 | 2.75E-04 | 1.48E-02 | 8.79E-02 |
| rs13260032 | Brain_Amygdala           | 8 | ADCY8 | 131923609 | rs17489    | 0.8576 | 132456603 | A | G | 0.46 | 2.65E-04 | 1.47E-02 | 8.69E-02 |
| rs13260032 | Brain_Amygdala           | 8 | ADCY8 | 131923609 | rs13266903 | 0.8576 | 132457471 | C | A | 0.47 | 3.50E-06 | 1.66E-02 | 4.13E-02 |
| rs13260032 | Brain_Amygdala           | 8 | ADCY8 | 131923609 | rs1430314  | 0.8576 | 132458270 | G | A | 0.46 | 2.45E-04 | 1.47E-02 | 8.56E-02 |
| rs13260032 | Brain_Amygdala           | 8 | ADCY8 | 131923609 | rs1594331  | 0.8576 | 132460787 | A | G | 0.47 | 3.79E-06 | 1.66E-02 | 4.11E-02 |
| rs13260032 | Brain_Amygdala           | 8 | ADCY8 | 131923609 | rs10109839 | 0.8541 | 132463052 | G | A | 0.47 | 1.82E-06 | 1.66E-02 | 3.81E-02 |
| rs13260032 | Brain_Frontal_Cortex_BA9 | 8 | ADCY8 | 131923609 | rs28544439 | 0.8954 | 132405308 | A | C | 0.42 | 3.11E-06 | 4.00E-02 | 6.51E-02 |
| rs13260032 | Brain_Frontal_Cortex_BA9 | 8 | ADCY8 | 131923609 | rs1900932  | 0.8954 | 132405894 | A | G | 0.43 | 2.08E-06 | 4.42E-02 | 6.87E-02 |
| rs13260032 | Brain_Frontal_Cortex_BA9 | 8 | ADCY8 | 131923609 | rs11774542 | 0.8269 | 132416893 | A | G | 0.45 | 1.75E-04 | 4.63E-02 | 1.17E-01 |
| rs13260032 | Brain_Frontal_Cortex_BA9 | 8 | ADCY8 | 131923609 | rs10956600 | 0.8576 | 132418520 | C | A | 0.47 | 9.59E-05 | 4.34E-02 | 1.02E-01 |

|            |                                       |   |              |           |            |        |           |   |   |      |          |          |          |
|------------|---------------------------------------|---|--------------|-----------|------------|--------|-----------|---|---|------|----------|----------|----------|
| rs13260032 | Brain_Frontal_Cortex_BA9              | 8 | ADCY8        | 131923609 | rs1430324  | 0.8497 | 132419109 | T | C | 0.47 | 9.59E-05 | 3.80E-02 | 9.66E-02 |
| rs13260032 | Brain_Frontal_Cortex_BA9              | 8 | ADCY8        | 131923609 | rs1430325  | 0.8303 | 132421240 | T | A | 0.45 | 3.99E-04 | 4.63E-02 | 1.29E-01 |
| rs13260032 | Brain_Frontal_Cortex_BA9              | 8 | ADCY8        | 131923609 | rs1375602  | 0.8497 | 132422143 | T | C | 0.45 | 1.18E-04 | 4.02E-02 | 1.02E-01 |
| rs13260032 | Brain_Frontal_Cortex_BA9              | 8 | ADCY8        | 131923609 | rs715985   | 0.8576 | 132423889 | G | A | 0.47 | 9.61E-05 | 4.34E-02 | 1.03E-01 |
| rs13260032 | Brain_Frontal_Cortex_BA9              | 8 | ADCY8        | 131923609 | rs6470972  | 0.8303 | 132424471 | T | C | 0.47 | 2.22E-04 | 4.52E-02 | 1.16E-01 |
| rs13260032 | Brain_Frontal_Cortex_BA9              | 8 | ADCY8        | 131923609 | rs1449471  | 0.8303 | 132424978 | A | G | 0.47 | 2.51E-04 | 4.52E-02 | 1.17E-01 |
| rs13260032 | Brain_Frontal_Cortex_BA9              | 8 | ADCY8        | 131923609 | rs1449472  | 0.8226 | 132425379 | T | C | 0.45 | 3.13E-04 | 4.14E-02 | 1.17E-01 |
| rs13260032 | Brain_Frontal_Cortex_BA9              | 8 | ADCY8        | 131923609 | rs9918761  | 0.8303 | 132425906 | A | T | 0.47 | 2.58E-04 | 4.52E-02 | 1.17E-01 |
| rs13260032 | Brain_Frontal_Cortex_BA9              | 8 | ADCY8        | 131923609 | rs1430323  | 0.8541 | 132428314 | T | C | 0.47 | 6.09E-05 | 1.71E-02 | 6.66E-02 |
| rs13260032 | Brain_Frontal_Cortex_BA9              | 8 | ADCY8        | 131923609 | rs7016957  | 0.8581 | 132447031 | T | C | 0.47 | 1.20E-04 | 2.67E-02 | 8.83E-02 |
| rs13260032 | Brain_Frontal_Cortex_BA9              | 8 | ADCY8        | 131923609 | rs13260032 | 1.0000 | 132451455 | C | A | 0.43 | 4.87E-07 | 4.75E-02 | 6.96E-02 |
| rs13260032 | Brain_Hippocampus                     | 8 | EFR3A        | 132971112 | rs12546678 | 0.8954 | 132405080 | A | C | 0.42 | 9.70E-06 | 4.39E-02 | 7.10E-02 |
| rs13260032 | Brain_Hippocampus                     | 8 | EFR3A        | 132971112 | rs28544439 | 0.8954 | 132405308 | A | C | 0.42 | 3.11E-06 | 3.20E-02 | 5.62E-02 |
| rs13260032 | Brain_Hippocampus                     | 8 | EFR3A        | 132971112 | rs1900932  | 0.8954 | 132405894 | A | G | 0.43 | 2.08E-06 | 2.38E-02 | 4.57E-02 |
| rs13260032 | Brain_Hippocampus                     | 8 | EFR3A        | 132971112 | rs10956599 | 0.8954 | 132408083 | T | C | 0.42 | 2.04E-06 | 2.42E-02 | 4.65E-02 |
| rs13260032 | Brain_Nucleus_accumbens_basal_ganglia | 8 | CTD-2501M5.1 | 132325335 | rs12546678 | 0.8954 | 132405080 | A | C | 0.42 | 9.70E-06 | 3.80E-02 | 6.46E-02 |
| rs13260032 | Brain_Nucleus_accumbens_basal_ganglia | 8 | CTD-2501M5.1 | 132325335 | rs28544439 | 0.8954 | 132405308 | A | C | 0.42 | 3.11E-06 | 1.48E-02 | 3.50E-02 |
| rs13260032 | Brain_Nucleus_accumbens_basal_ganglia | 8 | CTD-2501M5.1 | 132325335 | rs1900932  | 0.8954 | 132405894 | A | G | 0.43 | 2.08E-06 | 4.23E-02 | 6.66E-02 |
| rs13260032 | Brain_Nucleus_accumbens_basal_ganglia | 8 | CTD-2501M5.1 | 132325335 | rs891429   | 0.8014 | 132406960 | C | T | 0.46 | 2.44E-06 | 2.46E-02 | 4.89E-02 |
| rs13260032 | Brain_Nucleus_accumbens_basal_ganglia | 8 | CTD-2501M5.1 | 132325335 | rs10956599 | 0.8954 | 132408083 | T | C | 0.42 | 2.04E-06 | 3.71E-02 | 6.14E-02 |
| rs13260032 | Brain_Nucleus_accumbens_basal_ganglia | 8 | CTD-2501M5.1 | 132325335 | rs11774542 | 0.8269 | 132416893 | A | G | 0.45 | 1.75E-04 | 1.19E-02 | 7.44E-02 |
| rs13260032 | Brain_Nucleus_accumbens_basal_ganglia | 8 | CTD-2501M5.1 | 132325335 | rs10956600 | 0.8576 | 132418520 | C | A | 0.47 | 9.59E-05 | 3.72E-02 | 9.57E-02 |
| rs13260032 | Brain_Nucleus_accumbens_basal_ganglia | 8 | CTD-2501M5.1 | 132325335 | rs1430324  | 0.8497 | 132419109 | T | C | 0.47 | 9.59E-05 | 3.48E-02 | 9.29E-02 |
| rs13260032 | Brain_Nucleus_accumbens_basal_ganglia | 8 | CTD-2501M5.1 | 132325335 | rs1430325  | 0.8303 | 132421240 | T | A | 0.45 | 3.99E-04 | 1.20E-02 | 8.69E-02 |
| rs13260032 | Brain_Nucleus_accumbens_basal_ganglia | 8 | CTD-2501M5.1 | 132325335 | rs1375602  | 0.8497 | 132422143 | T | C | 0.45 | 1.18E-04 | 9.40E-03 | 6.09E-02 |
| rs13260032 | Brain_Nucleus_accumbens_basal_ganglia | 8 | CTD-2501M5.1 | 132325335 | rs715985   | 0.8576 | 132423889 | G | A | 0.47 | 9.61E-05 | 3.72E-02 | 9.58E-02 |
| rs13260032 | Brain_Nucleus_accumbens_basal_ganglia | 8 | CTD-2501M5.1 | 132325335 | rs6470972  | 0.8303 | 132424471 | T | C | 0.47 | 2.22E-04 | 4.40E-02 | 1.15E-01 |
| rs13260032 | Brain_Nucleus_accumbens_basal_ganglia | 8 | CTD-2501M5.1 | 132325335 | rs1449471  | 0.8303 | 132424978 | A | G | 0.47 | 2.51E-04 | 4.40E-02 | 1.15E-01 |
| rs13260032 | Brain_Nucleus_accumbens_basal_ganglia | 8 | CTD-2501M5.1 | 132325335 | rs1449472  | 0.8226 | 132425379 | T | C | 0.45 | 3.13E-04 | 1.15E-02 | 7.83E-02 |
| rs13260032 | Brain_Nucleus_accumbens_basal_ganglia | 8 | CTD-2501M5.1 | 132325335 | rs9918761  | 0.8303 | 132425906 | A | T | 0.47 | 2.58E-04 | 4.40E-02 | 1.16E-01 |
| rs13260032 | Brain_Nucleus_accumbens_basal_ganglia | 8 | CTD-2501M5.1 | 132325335 | rs9297822  | 0.8621 | 132428061 | G | T | 0.47 | 8.54E-05 | 4.55E-02 | 1.04E-01 |
| rs13260032 | Brain_Nucleus_accumbens_basal_ganglia | 8 | CTD-2501M5.1 | 132325335 | rs1430323  | 0.8541 | 132428314 | T | C | 0.47 | 6.09E-05 | 1.95E-02 | 7.01E-02 |
| rs13260032 | Brain_Nucleus_accumbens_basal_ganglia | 8 | CTD-2501M5.1 | 132325335 | rs1430322  | 0.8346 | 132429002 | A | G | 0.45 | 2.42E-04 | 1.54E-02 | 8.35E-02 |
| rs13260032 | Brain_Nucleus_accumbens_basal_ganglia | 8 | CTD-2501M5.1 | 132325335 | rs1346816  | 0.8626 | 132430495 | C | T | 0.47 | 9.47E-05 | 4.65E-02 | 1.08E-01 |
| rs13260032 | Brain_Nucleus_accumbens_basal_ganglia | 8 | CTD-2501M5.1 | 132325335 | rs6997462  | 0.8626 | 132431123 | G | A | 0.46 | 3.64E-04 | 2.81E-02 | 1.14E-01 |
| rs13260032 | Brain_Nucleus_accumbens_basal_ganglia | 8 | CTD-2501M5.1 | 132325335 | rs1562702  | 0.8626 | 132431713 | C | T | 0.47 | 1.38E-04 | 4.65E-02 | 1.13E-01 |
| rs13260032 | Brain_Nucleus_accumbens_basal_ganglia | 8 | CTD-2501M5.1 | 132325335 | rs7013917  | 0.8546 | 132434320 | C | A | 0.46 | 4.10E-06 | 2.76E-02 | 5.58E-02 |
| rs13260032 | Brain_Nucleus_accumbens_basal_ganglia | 8 | CTD-2501M5.1 | 132325335 | rs1346815  | 0.8546 | 132434697 | A | G | 0.46 | 4.15E-06 | 2.76E-02 | 5.58E-02 |
| rs13260032 | Brain_Nucleus_accumbens_basal_ganglia | 8 | CTD-2501M5.1 | 132325335 | rs1367279  | 0.8626 | 132435197 | G | T | 0.46 | 5.92E-04 | 3.69E-02 | 1.37E-01 |
| rs13260032 | Brain_Nucleus_accumbens_basal_ganglia | 8 | CTD-2501M5.1 | 132325335 | rs1430320  | 0.8546 | 132437383 | C | G | 0.47 | 1.19E-04 | 4.38E-02 | 1.08E-01 |

|            |                                       |   |              |           |            |        |           |   |   |      |          |          |          |
|------------|---------------------------------------|---|--------------|-----------|------------|--------|-----------|---|---|------|----------|----------|----------|
| rs13260032 | Brain_Nucleus_accumbens_basal_ganglia | 8 | CTD-2501M5.1 | 132325335 | rs1430319  | 0.8626 | 132437577 | C | T | 0.46 | 2.78E-04 | 1.77E-02 | 9.26E-02 |
| rs13260032 | Brain_Nucleus_accumbens_basal_ganglia | 8 | CTD-2501M5.1 | 132325335 | rs1367278  | 0.8592 | 132437635 | G | A | 0.47 | 1.10E-04 | 4.65E-02 | 1.09E-01 |
| rs13260032 | Brain_Nucleus_accumbens_basal_ganglia | 8 | CTD-2501M5.1 | 132325335 | rs2195626  | 0.8626 | 132437929 | A | G | 0.47 | 1.09E-04 | 4.62E-02 | 1.09E-01 |
| rs13260032 | Brain_Nucleus_accumbens_basal_ganglia | 8 | CTD-2501M5.1 | 132325335 | rs10956601 | 0.8660 | 132439003 | G | T | 0.46 | 2.77E-04 | 2.06E-02 | 9.62E-02 |
| rs13260032 | Brain_Nucleus_accumbens_basal_ganglia | 8 | CTD-2501M5.1 | 132325335 | rs6470975  | 0.8626 | 132439128 | C | T | 0.46 | 3.99E-04 | 2.25E-02 | 1.08E-01 |
| rs13260032 | Brain_Nucleus_accumbens_basal_ganglia | 8 | CTD-2501M5.1 | 132325335 | rs1430317  | 0.8581 | 132441048 | C | T | 0.46 | 2.81E-04 | 2.03E-02 | 9.62E-02 |
| rs13260032 | Brain_Nucleus_accumbens_basal_ganglia | 8 | CTD-2501M5.1 | 132325335 | rs1430316  | 0.8660 | 132443583 | C | T | 0.46 | 4.56E-04 | 4.79E-02 | 1.40E-01 |
| rs13260032 | Brain_Nucleus_accumbens_basal_ganglia | 8 | CTD-2501M5.1 | 132325335 | rs7016765  | 0.8581 | 132446857 | A | C | 0.47 | 1.10E-04 | 2.42E-02 | 8.39E-02 |
| rs13260032 | Brain_Nucleus_accumbens_basal_ganglia | 8 | CTD-2501M5.1 | 132325335 | rs7016957  | 0.8581 | 132447031 | T | C | 0.47 | 1.20E-04 | 4.50E-02 | 1.09E-01 |
| rs13260032 | Brain_Nucleus_accumbens_basal_ganglia | 8 | CTD-2501M5.1 | 132325335 | rs1119003  | 0.8660 | 132447848 | A | T | 0.46 | 2.80E-04 | 2.63E-02 | 1.04E-01 |
| rs13260032 | Brain_Nucleus_accumbens_basal_ganglia | 8 | CTD-2501M5.1 | 132325335 | rs1119002  | 0.8660 | 132447890 | G | A | 0.46 | 2.80E-04 | 1.25E-02 | 8.45E-02 |
| rs13260032 | Brain_Nucleus_accumbens_basal_ganglia | 8 | CTD-2501M5.1 | 132325335 | rs1449473  | 0.8615 | 132454864 | A | C | 0.46 | 4.54E-04 | 2.03E-02 | 1.09E-01 |
| rs13260032 | Brain_Nucleus_accumbens_basal_ganglia | 8 | CTD-2501M5.1 | 132325335 | rs1449474  | 0.8615 | 132454897 | A | G | 0.46 | 2.74E-04 | 2.03E-02 | 9.58E-02 |
| rs13260032 | Brain_Nucleus_accumbens_basal_ganglia | 8 | CTD-2501M5.1 | 132325335 | rs1346811  | 0.8615 | 132455575 | T | A | 0.46 | 2.75E-04 | 2.03E-02 | 9.60E-02 |
| rs13260032 | Brain_Nucleus_accumbens_basal_ganglia | 8 | CTD-2501M5.1 | 132325335 | rs17489    | 0.8576 | 132456603 | A | G | 0.46 | 2.65E-04 | 2.03E-02 | 9.51E-02 |
| rs13260032 | Brain_Nucleus_accumbens_basal_ganglia | 8 | CTD-2501M5.1 | 132325335 | rs1430314  | 0.8576 | 132458270 | G | A | 0.46 | 2.45E-04 | 2.03E-02 | 9.39E-02 |
| rs13260032 | Brain_Putamen_basal_ganglia           | 8 | ADCY8        | 131923609 | rs13260032 | 1.0000 | 132451455 | C | A | 0.43 | 4.87E-07 | 2.86E-02 | 4.88E-02 |
| rs13260032 | Brain_Spinal_cord_cervical_c-1        | 8 | ADCY8        | 131923609 | rs10956601 | 0.8660 | 132439003 | G | T | 0.46 | 2.77E-04 | 4.79E-02 | 1.27E-01 |
| rs13260032 | Brain_Spinal_cord_cervical_c-1        | 8 | ADCY8        | 131923609 | rs6470975  | 0.8626 | 132439128 | C | T | 0.46 | 3.99E-04 | 3.38E-02 | 1.21E-01 |
| rs13260032 | Brain_Spinal_cord_cervical_c-1        | 8 | ADCY8        | 131923609 | rs1430317  | 0.8581 | 132441048 | C | T | 0.46 | 2.81E-04 | 4.79E-02 | 1.28E-01 |
| rs13260032 | Brain_Spinal_cord_cervical_c-1        | 8 | ADCY8        | 131923609 | rs1430316  | 0.8660 | 132443583 | C | T | 0.46 | 4.56E-04 | 4.70E-02 | 1.39E-01 |
| rs13260032 | Brain_Spinal_cord_cervical_c-1        | 8 | ADCY8        | 131923609 | rs13260032 | 1.0000 | 132451455 | C | A | 0.43 | 4.87E-07 | 1.77E-02 | 3.57E-02 |
| rs13260032 | Brain_Spinal_cord_cervical_c-1        | 8 | ADCY8        | 131923609 | rs1449473  | 0.8615 | 132454864 | A | C | 0.46 | 4.54E-04 | 4.79E-02 | 1.40E-01 |
| rs13260032 | Brain_Spinal_cord_cervical_c-1        | 8 | ADCY8        | 131923609 | rs1449474  | 0.8615 | 132454897 | A | G | 0.46 | 2.74E-04 | 4.79E-02 | 1.27E-01 |
| rs13260032 | Brain_Spinal_cord_cervical_c-1        | 8 | ADCY8        | 131923609 | rs17489    | 0.8576 | 132456603 | A | G | 0.46 | 2.65E-04 | 4.79E-02 | 1.27E-01 |
| rs13260032 | Brain_Spinal_cord_cervical_c-1        | 8 | ADCY8        | 131923609 | rs1430314  | 0.8576 | 132458270 | G | A | 0.46 | 2.45E-04 | 4.79E-02 | 1.26E-01 |
| rs4680057  | Brain_Anterior_cingulate_cortex_BA24  | 3 | RP11-38P22.2 | 152558203 | rs4680056  | 0.9523 | 153096430 | G | A | 0.43 | 5.13E-05 | 4.30E-02 | 6.91E-02 |
| rs4680057  | Brain_Anterior_cingulate_cortex_BA24  | 3 | RP11-38P22.2 | 152558203 | rs4680057  | 1.0000 | 153096985 | A | G | 0.44 | 9.69E-07 | 2.43E-02 | 4.72E-02 |
| rs4680057  | Brain_Anterior_cingulate_cortex_BA24  | 3 | RP11-38P22.2 | 152558203 | rs7627262  | 0.9489 | 153097522 | T | C | 0.43 | 1.84E-05 | 2.79E-02 | 6.43E-02 |
| rs4680057  | Brain_Anterior_cingulate_cortex_BA24  | 3 | RP11-38P22.2 | 152558203 | rs7639345  | 0.9489 | 153097961 | C | T | 0.43 | 1.54E-05 | 2.79E-02 | 6.36E-02 |
| rs4680057  | Brain_Anterior_cingulate_cortex_BA24  | 3 | RP11-38P22.2 | 152558203 | rs2135773  | 0.9489 | 153098130 | T | C | 0.43 | 1.79E-05 | 2.79E-02 | 6.39E-02 |
| rs4680057  | Brain_Anterior_cingulate_cortex_BA24  | 3 | RP11-38P22.2 | 152558203 | rs1018179  | 0.9489 | 153098264 | C | T | 0.43 | 1.66E-05 | 2.79E-02 | 6.35E-02 |
| rs4680057  | Brain_Anterior_cingulate_cortex_BA24  | 3 | RP11-38P22.2 | 152558203 | rs9852688  | 0.9489 | 153098558 | C | T | 0.43 | 1.66E-05 | 2.79E-02 | 6.35E-02 |
| rs4680057  | Brain_Anterior_cingulate_cortex_BA24  | 3 | RP11-38P22.2 | 152558203 | rs955014   | 0.9451 | 153099380 | C | T | 0.43 | 1.37E-05 | 4.10E-02 | 7.61E-02 |
| rs4680057  | Brain_Anterior_cingulate_cortex_BA24  | 3 | RP11-38P22.2 | 152558203 | rs13091512 | 0.9451 | 153099518 | T | A | 0.43 | 1.76E-05 | 2.79E-02 | 6.26E-02 |
| rs4680057  | Brain_Anterior_cingulate_cortex_BA24  | 3 | RP11-38P22.2 | 152558203 | rs9843491  | 0.9412 | 153100477 | A | G | 0.43 | 2.01E-05 | 1.29E-02 | 4.33E-02 |
| rs4680057  | Brain_Anterior_cingulate_cortex_BA24  | 3 | RP11-38P22.2 | 152558203 | rs4679708  | 0.9372 | 153102867 | G | C | 0.43 | 4.96E-05 | 1.29E-02 | 4.64E-02 |
| rs4680057  | Brain_Anterior_cingulate_cortex_BA24  | 3 | RP11-38P22.2 | 152558203 | rs4679709  | 0.9332 | 153103018 | G | A | 0.43 | 5.10E-05 | 1.29E-02 | 4.66E-02 |
| rs4680057  | Brain_Anterior_cingulate_cortex_BA24  | 3 | RP11-38P22.2 | 152558203 | rs1018176  | 0.9332 | 153103636 | A | G | 0.43 | 4.96E-05 | 1.29E-02 | 4.64E-02 |
| rs4680057  | Brain_Anterior_cingulate_cortex_BA24  | 3 | ARHGEF26-AS1 | 153790655 | rs1018177  | 0.8535 | 153103714 | G | A | 0.48 | 1.88E-04 | 2.08E-02 | 7.08E-02 |

|           |                                      |   |              |           |            |        |           |   |   |      |          |          |          |
|-----------|--------------------------------------|---|--------------|-----------|------------|--------|-----------|---|---|------|----------|----------|----------|
| rs4680057 | Brain_Anterior_cingulate_cortex_BA24 | 3 | RP11-38P22.2 | 152558203 | rs9864621  | 0.9294 | 153104577 | T | C | 0.43 | 2.99E-05 | 1.29E-02 | 4.48E-02 |
| rs4680057 | Brain_Anterior_cingulate_cortex_BA24 | 3 | RP11-38P22.2 | 152558203 | rs9815053  | 0.9332 | 153105128 | A | G | 0.43 | 4.62E-05 | 1.29E-02 | 4.60E-02 |
| rs4680057 | Brain_Anterior_cingulate_cortex_BA24 | 3 | RP11-38P22.2 | 152558203 | rs9815215  | 0.9332 | 153105380 | T | C | 0.43 | 2.97E-05 | 1.29E-02 | 4.37E-02 |
| rs4680057 | Brain_Anterior_cingulate_cortex_BA24 | 3 | RP11-38P22.2 | 152558203 | rs9835730  | 0.9332 | 153105773 | C | T | 0.43 | 4.71E-05 | 1.29E-02 | 4.61E-02 |
| rs4680057 | Brain_Anterior_cingulate_cortex_BA24 | 3 | RP11-38P22.2 | 152558203 | rs9819928  | 0.9332 | 153105912 | A | G | 0.43 | 4.07E-05 | 1.29E-02 | 4.57E-02 |
| rs4680057 | Brain_Anterior_cingulate_cortex_BA24 | 3 | RP11-38P22.2 | 152558203 | rs9858222  | 0.9332 | 153106464 | G | A | 0.43 | 4.24E-05 | 1.29E-02 | 4.58E-02 |
| rs4680057 | Brain_Anterior_cingulate_cortex_BA24 | 3 | RP11-38P22.2 | 152558203 | rs6777504  | 0.9294 | 153106837 | T | C | 0.43 | 3.60E-05 | 1.29E-02 | 4.53E-02 |
| rs4680057 | Brain_Anterior_cingulate_cortex_BA24 | 3 | ARHGEF26-AS1 | 153790655 | rs9831094  | 0.8535 | 153108239 | A | G | 0.48 | 1.61E-04 | 2.67E-02 | 7.72E-02 |
| rs4680057 | Brain_Anterior_cingulate_cortex_BA24 | 3 | RP11-38P22.2 | 152558203 | rs9831443  | 0.9332 | 153108551 | G | C | 0.43 | 3.66E-05 | 1.29E-02 | 4.54E-02 |
| rs4680057 | Brain_Anterior_cingulate_cortex_BA24 | 3 | P2RY1        | 152554288 | rs1827993  | 0.9294 | 153110407 | T | G | 0.43 | 7.17E-05 | 4.99E-02 | 9.15E-02 |
| rs4680057 | Brain_Anterior_cingulate_cortex_BA24 | 3 | RP11-38P22.2 | 152558203 | rs1827993  | 0.9294 | 153110407 | T | G | 0.43 | 7.17E-05 | 4.97E-03 | 3.21E-02 |
| rs4680057 | Brain_Anterior_cingulate_cortex_BA24 | 3 | RP11-38P22.2 | 152558203 | rs9862101  | 0.9332 | 153110559 | A | T | 0.43 | 3.66E-05 | 1.25E-02 | 4.48E-02 |
| rs4680057 | Brain_Anterior_cingulate_cortex_BA24 | 3 | RP11-38P22.2 | 152558203 | rs2135774  | 0.9332 | 153113202 | T | C | 0.43 | 4.33E-05 | 1.25E-02 | 4.52E-02 |
| rs4680057 | Brain_Anterior_cingulate_cortex_BA24 | 3 | ARHGEF26-AS1 | 153790655 | rs1580988  | 0.8573 | 153114027 | C | A | 0.48 | 2.19E-04 | 4.94E-02 | 1.04E-01 |
| rs4680057 | Brain_Anterior_cingulate_cortex_BA24 | 3 | RP11-38P22.2 | 152558203 | rs6790236  | 0.9331 | 153115590 | G | C | 0.43 | 4.20E-05 | 1.29E-02 | 4.48E-02 |
| rs4680057 | Brain_Anterior_cingulate_cortex_BA24 | 3 | RP11-38P22.2 | 152558203 | rs6790408  | 0.9331 | 153115593 | A | G | 0.43 | 4.20E-05 | 1.29E-02 | 4.48E-02 |
| rs4680057 | Brain_Anterior_cingulate_cortex_BA24 | 3 | ARHGEF26-AS1 | 153790655 | rs3903613  | 0.8498 | 153116369 | C | T | 0.48 | 1.75E-04 | 9.57E-03 | 5.23E-02 |
| rs4680057 | Brain_Anterior_cingulate_cortex_BA24 | 3 | P2RY1        | 152554288 | rs9289909  | 0.9255 | 153116825 | C | G | 0.43 | 7.61E-05 | 4.99E-02 | 9.15E-02 |
| rs4680057 | Brain_Anterior_cingulate_cortex_BA24 | 3 | RP11-38P22.2 | 152558203 | rs9289909  | 0.9255 | 153116825 | C | G | 0.43 | 7.61E-05 | 4.97E-03 | 3.21E-02 |
| rs4680057 | Brain_Anterior_cingulate_cortex_BA24 | 3 | ARHGEF26-AS1 | 153790655 | rs6794116  | 0.8498 | 153116888 | A | G | 0.48 | 1.83E-04 | 2.17E-02 | 7.12E-02 |
| rs4680057 | Brain_Anterior_cingulate_cortex_BA24 | 3 | RP11-38P22.2 | 152558203 | rs9850272  | 0.9293 | 153116954 | A | C | 0.43 | 4.46E-05 | 1.14E-02 | 4.35E-02 |
| rs4680057 | Brain_Anterior_cingulate_cortex_BA24 | 3 | RP11-38P22.2 | 152558203 | rs9289910  | 0.9293 | 153117193 | G | A | 0.43 | 4.04E-05 | 1.29E-02 | 4.52E-02 |
| rs4680057 | Brain_Anterior_cingulate_cortex_BA24 | 3 | ARHGEF26-AS1 | 153790655 | rs1507160  | 0.8462 | 153117704 | G | A | 0.47 | 2.69E-04 | 2.08E-02 | 7.54E-02 |
| rs4680057 | Brain_Anterior_cingulate_cortex_BA24 | 3 | ARHGEF26-AS1 | 153790655 | rs10049279 | 0.8498 | 153118601 | A | G | 0.48 | 1.77E-04 | 2.08E-02 | 6.92E-02 |
| rs4680057 | Brain_Anterior_cingulate_cortex_BA24 | 3 | RP11-38P22.2 | 152558203 | rs4680059  | 0.8498 | 153118849 | A | G | 0.48 | 2.20E-04 | 4.90E-02 | 1.03E-01 |
| rs4680057 | Brain_Anterior_cingulate_cortex_BA24 | 3 | ARHGEF26-AS1 | 153790655 | rs4680059  | 0.8498 | 153118849 | A | G | 0.48 | 2.20E-04 | 1.04E-02 | 5.43E-02 |
| rs4680057 | Brain_Anterior_cingulate_cortex_BA24 | 3 | RP11-38P22.2 | 152558203 | rs12695988 | 0.9293 | 153122300 | A | C | 0.43 | 2.73E-05 | 1.12E-02 | 4.00E-02 |
| rs4680057 | Brain_Caudate_basal_ganglia          | 3 | DDX50P2      | 154071256 | rs1018177  | 0.8535 | 153103714 | G | A | 0.48 | 1.88E-04 | 2.79E-02 | 7.99E-02 |
| rs4680057 | Brain_Caudate_basal_ganglia          | 3 | ARHGEF26-AS1 | 153790655 | rs9831094  | 0.8535 | 153108239 | A | G | 0.48 | 1.61E-04 | 2.23E-02 | 7.17E-02 |
| rs4680057 | Brain_Caudate_basal_ganglia          | 3 | DDX50P2      | 154071256 | rs9831094  | 0.8535 | 153108239 | A | G | 0.48 | 1.61E-04 | 1.27E-02 | 5.77E-02 |
| rs4680057 | Brain_Caudate_basal_ganglia          | 3 | DDX50P2      | 154071256 | rs1580988  | 0.8573 | 153114027 | C | A | 0.48 | 2.19E-04 | 2.73E-02 | 7.95E-02 |
| rs4680057 | Brain_Caudate_basal_ganglia          | 3 | DDX50P2      | 154071256 | rs3903613  | 0.8498 | 153116369 | C | T | 0.48 | 1.75E-04 | 2.88E-02 | 7.98E-02 |
| rs4680057 | Brain_Caudate_basal_ganglia          | 3 | ARHGEF26-AS1 | 153790655 | rs6794116  | 0.8498 | 153116888 | A | G | 0.48 | 1.83E-04 | 4.64E-02 | 1.00E-01 |
| rs4680057 | Brain_Caudate_basal_ganglia          | 3 | DDX50P2      | 154071256 | rs6794116  | 0.8498 | 153116888 | A | G | 0.48 | 1.83E-04 | 2.97E-02 | 8.13E-02 |
| rs4680057 | Brain_Caudate_basal_ganglia          | 3 | ARHGEF26-AS1 | 153790655 | rs1507160  | 0.8462 | 153117704 | G | A | 0.47 | 2.69E-04 | 4.58E-02 | 1.05E-01 |
| rs4680057 | Brain_Caudate_basal_ganglia          | 3 | DDX50P2      | 154071256 | rs1507160  | 0.8462 | 153117704 | G | A | 0.47 | 2.69E-04 | 3.17E-02 | 8.90E-02 |
| rs4680057 | Brain_Caudate_basal_ganglia          | 3 | ARHGEF26-AS1 | 153790655 | rs10049279 | 0.8498 | 153118601 | A | G | 0.48 | 1.77E-04 | 4.51E-02 | 9.77E-02 |
| rs4680057 | Brain_Caudate_basal_ganglia          | 3 | DDX50P2      | 154071256 | rs10049279 | 0.8498 | 153118601 | A | G | 0.48 | 1.77E-04 | 3.25E-02 | 8.37E-02 |
| rs4680057 | Brain_Caudate_basal_ganglia          | 3 | DDX50P2      | 154071256 | rs4680059  | 0.8498 | 153118849 | A | G | 0.48 | 2.20E-04 | 1.69E-02 | 6.47E-02 |
| rs4680057 | Brain_Cerebellar_Hemisphere          | 3 | RAP2B        | 152883147 | rs4680056  | 0.9523 | 153096430 | G | A | 0.43 | 5.13E-05 | 2.94E-02 | 5.39E-02 |

|           |                          |   |              |           |            |        |           |   |   |      |          |          |          |
|-----------|--------------------------|---|--------------|-----------|------------|--------|-----------|---|---|------|----------|----------|----------|
| rs4680057 | Brain_Cerebellum         | 3 | RP11-362A9.3 | 152195075 | rs13073679 | 0.9523 | 153096642 | T | C | 0.44 | 1.03E-03 | 4.55E-02 | 1.10E-01 |
| rs4680057 | Brain_Cerebellum         | 3 | RP11-362A9.3 | 152195075 | rs9289909  | 0.9255 | 153116825 | C | G | 0.43 | 7.61E-05 | 4.79E-02 | 8.94E-02 |
| rs4680057 | Brain_Frontal_Cortex_BA9 | 3 | ARHGEF26-AS1 | 153790655 | rs4680059  | 0.8498 | 153118849 | A | G | 0.48 | 2.20E-04 | 4.49E-02 | 9.85E-02 |
| rs4680057 | Brain_Hippocampus        | 3 | RP11-38P22.2 | 152558203 | rs13073679 | 0.9523 | 153096642 | T | C | 0.44 | 1.03E-03 | 1.56E-02 | 7.39E-02 |
| rs4680057 | Brain_Hippocampus        | 3 | RP11-38P22.2 | 152558203 | rs9822507  | 0.9293 | 153096674 | C | G | 0.48 | 9.79E-02 | 1.88E-02 | 4.92E-02 |
| rs4680057 | Brain_Hippocampus        | 3 | RP11-38P22.2 | 152558203 | rs4680057  | 1.0000 | 153096985 | A | G | 0.44 | 9.69E-07 | 1.58E-02 | 3.64E-02 |
| rs4680057 | Brain_Hippocampus        | 3 | RP11-38P22.2 | 152558203 | rs7627262  | 0.9489 | 153097522 | T | C | 0.43 | 1.84E-05 | 1.88E-02 | 5.29E-02 |
| rs4680057 | Brain_Hippocampus        | 3 | RP11-38P22.2 | 152558203 | rs7639345  | 0.9489 | 153097961 | C | T | 0.43 | 1.54E-05 | 1.88E-02 | 5.21E-02 |
| rs4680057 | Brain_Hippocampus        | 3 | RP11-38P22.2 | 152558203 | rs2135773  | 0.9489 | 153098130 | T | C | 0.43 | 1.79E-05 | 1.88E-02 | 5.24E-02 |
| rs4680057 | Brain_Hippocampus        | 3 | RP11-38P22.2 | 152558203 | rs1018179  | 0.9489 | 153098264 | C | T | 0.43 | 1.66E-05 | 1.88E-02 | 5.20E-02 |
| rs4680057 | Brain_Hippocampus        | 3 | RP11-38P22.2 | 152558203 | rs9852688  | 0.9489 | 153098558 | C | T | 0.43 | 1.66E-05 | 1.88E-02 | 5.20E-02 |
| rs4680057 | Brain_Hippocampus        | 3 | RP11-38P22.2 | 152558203 | rs955014   | 0.9451 | 153099380 | C | T | 0.43 | 1.37E-05 | 2.32E-03 | 2.05E-02 |
| rs4680057 | Brain_Hippocampus        | 3 | RP11-38P22.2 | 152558203 | rs13091512 | 0.9451 | 153099518 | T | A | 0.43 | 1.76E-05 | 4.58E-03 | 2.76E-02 |
| rs4680057 | Brain_Hippocampus        | 3 | RP11-38P22.2 | 152558203 | rs9843491  | 0.9412 | 153100477 | A | G | 0.43 | 2.01E-05 | 1.38E-02 | 4.47E-02 |
| rs4680057 | Brain_Hippocampus        | 3 | RP11-38P22.2 | 152558203 | rs4679708  | 0.9372 | 153102867 | G | C | 0.43 | 4.96E-05 | 1.14E-02 | 4.40E-02 |
| rs4680057 | Brain_Hippocampus        | 3 | RP11-38P22.2 | 152558203 | rs4679709  | 0.9332 | 153103018 | G | A | 0.43 | 5.10E-05 | 1.14E-02 | 4.42E-02 |
| rs4680057 | Brain_Hippocampus        | 3 | RP11-38P22.2 | 152558203 | rs1018176  | 0.9332 | 153103636 | A | G | 0.43 | 4.96E-05 | 1.14E-02 | 4.40E-02 |
| rs4680057 | Brain_Hippocampus        | 3 | RP11-38P22.2 | 152558203 | rs1018177  | 0.8535 | 153103714 | G | A | 0.48 | 1.88E-04 | 3.70E-02 | 9.06E-02 |
| rs4680057 | Brain_Hippocampus        | 3 | RP11-38P22.2 | 152558203 | rs9864621  | 0.9294 | 153104577 | T | C | 0.43 | 2.99E-05 | 1.14E-02 | 4.25E-02 |
| rs4680057 | Brain_Hippocampus        | 3 | RP11-38P22.2 | 152558203 | rs9815053  | 0.9332 | 153105128 | A | G | 0.43 | 4.62E-05 | 1.14E-02 | 4.36E-02 |
| rs4680057 | Brain_Hippocampus        | 3 | RP11-38P22.2 | 152558203 | rs9815215  | 0.9332 | 153105380 | T | C | 0.43 | 2.97E-05 | 1.14E-02 | 4.14E-02 |
| rs4680057 | Brain_Hippocampus        | 3 | RP11-38P22.2 | 152558203 | rs9835730  | 0.9332 | 153105773 | C | T | 0.43 | 4.71E-05 | 1.14E-02 | 4.37E-02 |
| rs4680057 | Brain_Hippocampus        | 3 | RP11-38P22.2 | 152558203 | rs9819928  | 0.9332 | 153105912 | A | G | 0.43 | 4.07E-05 | 1.14E-02 | 4.33E-02 |
| rs4680057 | Brain_Hippocampus        | 3 | RP11-38P22.2 | 152558203 | rs9858222  | 0.9332 | 153106464 | G | A | 0.43 | 4.24E-05 | 1.14E-02 | 4.34E-02 |
| rs4680057 | Brain_Hippocampus        | 3 | RP11-38P22.2 | 152558203 | rs6777504  | 0.9294 | 153106837 | T | C | 0.43 | 3.60E-05 | 1.14E-02 | 4.29E-02 |
| rs4680057 | Brain_Hippocampus        | 3 | RP11-38P22.2 | 152558203 | rs9831094  | 0.8535 | 153108239 | A | G | 0.48 | 1.61E-04 | 2.18E-02 | 7.10E-02 |
| rs4680057 | Brain_Hippocampus        | 3 | RP11-38P22.2 | 152558203 | rs9831443  | 0.9332 | 153108551 | G | C | 0.43 | 3.66E-05 | 1.14E-02 | 4.30E-02 |
| rs4680057 | Brain_Hippocampus        | 3 | RP11-38P22.2 | 152558203 | rs1827993  | 0.9294 | 153110407 | T | G | 0.43 | 7.17E-05 | 1.19E-02 | 4.51E-02 |
| rs4680057 | Brain_Hippocampus        | 3 | RP11-38P22.2 | 152558203 | rs9862101  | 0.9332 | 153110559 | A | T | 0.43 | 3.66E-05 | 1.15E-02 | 4.33E-02 |
| rs4680057 | Brain_Hippocampus        | 3 | RP11-38P22.2 | 152558203 | rs2135774  | 0.9332 | 153113202 | T | C | 0.43 | 4.33E-05 | 1.09E-02 | 4.26E-02 |
| rs4680057 | Brain_Hippocampus        | 3 | RP11-38P22.2 | 152558203 | rs1580988  | 0.8573 | 153114027 | C | A | 0.48 | 2.19E-04 | 3.72E-02 | 9.11E-02 |
| rs4680057 | Brain_Hippocampus        | 3 | RP11-38P22.2 | 152558203 | rs6790236  | 0.9331 | 153115590 | G | C | 0.43 | 4.20E-05 | 1.14E-02 | 4.24E-02 |
| rs4680057 | Brain_Hippocampus        | 3 | RP11-38P22.2 | 152558203 | rs6790408  | 0.9331 | 153115593 | A | G | 0.43 | 4.20E-05 | 1.14E-02 | 4.24E-02 |
| rs4680057 | Brain_Hippocampus        | 3 | RP11-38P22.2 | 152558203 | rs3903613  | 0.8498 | 153116369 | C | T | 0.48 | 1.75E-04 | 3.94E-02 | 9.20E-02 |
| rs4680057 | Brain_Hippocampus        | 3 | ARHGEF26-AS1 | 153790655 | rs3903613  | 0.8498 | 153116369 | C | T | 0.48 | 1.75E-04 | 4.40E-02 | 9.70E-02 |
| rs4680057 | Brain_Hippocampus        | 3 | RP11-38P22.2 | 152558203 | rs9289909  | 0.9255 | 153116825 | C | G | 0.43 | 7.61E-05 | 1.19E-02 | 4.51E-02 |
| rs4680057 | Brain_Hippocampus        | 3 | RP11-38P22.2 | 152558203 | rs6794116  | 0.8498 | 153116888 | A | G | 0.48 | 1.83E-04 | 3.70E-02 | 8.98E-02 |
| rs4680057 | Brain_Hippocampus        | 3 | RP11-38P22.2 | 152558203 | rs9850272  | 0.9293 | 153116954 | A | C | 0.43 | 4.46E-05 | 9.79E-03 | 4.08E-02 |
| rs4680057 | Brain_Hippocampus        | 3 | RP11-38P22.2 | 152558203 | rs9289910  | 0.9293 | 153117193 | G | A | 0.43 | 4.04E-05 | 1.14E-02 | 4.28E-02 |
| rs4680057 | Brain_Hippocampus        | 3 | RP11-38P22.2 | 152558203 | rs1507160  | 0.8462 | 153117704 | G | A | 0.47 | 2.69E-04 | 3.70E-02 | 9.51E-02 |

|           |                                       |   |              |           |            |        |           |   |   |      |          |          |          |
|-----------|---------------------------------------|---|--------------|-----------|------------|--------|-----------|---|---|------|----------|----------|----------|
| rs4680057 | Brain_Hippocampus                     | 3 | RP11-38P22.2 | 152558203 | rs10049279 | 0.8498 | 153118601 | A | G | 0.48 | 1.77E-04 | 3.70E-02 | 8.90E-02 |
| rs4680057 | Brain_Hippocampus                     | 3 | RP11-38P22.2 | 152558203 | rs4680059  | 0.8498 | 153118849 | A | G | 0.48 | 2.20E-04 | 1.53E-02 | 6.22E-02 |
| rs4680057 | Brain_Hippocampus                     | 3 | RP11-38P22.2 | 152558203 | rs12695988 | 0.9293 | 153122300 | A | C | 0.43 | 2.73E-05 | 9.64E-03 | 3.75E-02 |
| rs4680057 | Brain_Hypothalamus                    | 3 | DHX36        | 154016310 | rs1018177  | 0.8535 | 153103714 | G | A | 0.48 | 1.88E-04 | 3.54E-02 | 8.88E-02 |
| rs4680057 | Brain_Hypothalamus                    | 3 | DHX36        | 154016310 | rs9831094  | 0.8535 | 153108239 | A | G | 0.48 | 1.61E-04 | 3.61E-02 | 8.83E-02 |
| rs4680057 | Brain_Hypothalamus                    | 3 | ARHGEF26     | 153907204 | rs3903613  | 0.8498 | 153116369 | C | T | 0.48 | 1.75E-04 | 2.25E-02 | 7.18E-02 |
| rs4680057 | Brain_Hypothalamus                    | 3 | DHX36        | 154016310 | rs6794116  | 0.8498 | 153116888 | A | G | 0.48 | 1.83E-04 | 3.72E-02 | 8.99E-02 |
| rs4680057 | Brain_Hypothalamus                    | 3 | DHX36        | 154016310 | rs1507160  | 0.8462 | 153117704 | G | A | 0.47 | 2.69E-04 | 3.61E-02 | 9.41E-02 |
| rs4680057 | Brain_Hypothalamus                    | 3 | DHX36        | 154016310 | rs10049279 | 0.8498 | 153118601 | A | G | 0.48 | 1.77E-04 | 3.61E-02 | 8.79E-02 |
| rs4680057 | Brain_Nucleus_accumbens_basal_ganglia | 3 | RAP2B        | 152883147 | rs4680056  | 0.9523 | 153096430 | G | A | 0.43 | 5.13E-05 | 7.60E-03 | 2.49E-02 |
| rs4680057 | Brain_Nucleus_accumbens_basal_ganglia | 3 | RAP2B        | 152883147 | rs13073679 | 0.9523 | 153096642 | T | C | 0.44 | 1.03E-03 | 1.99E-02 | 8.00E-02 |
| rs4680057 | Brain_Nucleus_accumbens_basal_ganglia | 3 | RAP2B        | 152883147 | rs9822507  | 0.9293 | 153096674 | C | G | 0.48 | 9.79E-02 | 1.18E-02 | 3.91E-02 |
| rs4680057 | Brain_Nucleus_accumbens_basal_ganglia | 3 | RAP2B        | 152883147 | rs4680057  | 1.0000 | 153096985 | A | G | 0.44 | 9.69E-07 | 2.00E-02 | 4.19E-02 |
| rs4680057 | Brain_Nucleus_accumbens_basal_ganglia | 3 | RAP2B        | 152883147 | rs7627262  | 0.9489 | 153097522 | T | C | 0.43 | 1.84E-05 | 1.21E-02 | 4.31E-02 |
| rs4680057 | Brain_Nucleus_accumbens_basal_ganglia | 3 | RAP2B        | 152883147 | rs7639345  | 0.9489 | 153097961 | C | T | 0.43 | 1.54E-05 | 1.21E-02 | 4.24E-02 |
| rs4680057 | Brain_Nucleus_accumbens_basal_ganglia | 3 | RAP2B        | 152883147 | rs2135773  | 0.9489 | 153098130 | T | C | 0.43 | 1.79E-05 | 1.21E-02 | 4.27E-02 |
| rs4680057 | Brain_Nucleus_accumbens_basal_ganglia | 3 | RAP2B        | 152883147 | rs1018179  | 0.9489 | 153098264 | C | T | 0.43 | 1.66E-05 | 1.21E-02 | 4.23E-02 |
| rs4680057 | Brain_Nucleus_accumbens_basal_ganglia | 3 | RAP2B        | 152883147 | rs9852688  | 0.9489 | 153098558 | C | T | 0.43 | 1.66E-05 | 1.21E-02 | 4.23E-02 |
| rs4680057 | Brain_Nucleus_accumbens_basal_ganglia | 3 | RAP2B        | 152883147 | rs955014   | 0.9451 | 153099380 | C | T | 0.43 | 1.37E-05 | 4.12E-03 | 2.53E-02 |
| rs4680057 | Brain_Nucleus_accumbens_basal_ganglia | 3 | RAP2B        | 152883147 | rs13091512 | 0.9451 | 153099518 | T | A | 0.43 | 1.76E-05 | 5.64E-03 | 3.00E-02 |
| rs4680057 | Brain_Nucleus_accumbens_basal_ganglia | 3 | RAP2B        | 152883147 | rs9843491  | 0.9412 | 153100477 | A | G | 0.43 | 2.01E-05 | 3.07E-02 | 6.68E-02 |
| rs4680057 | Brain_Nucleus_accumbens_basal_ganglia | 3 | RAP2B        | 152883147 | rs4679708  | 0.9372 | 153102867 | G | C | 0.43 | 4.96E-05 | 3.22E-02 | 7.18E-02 |
| rs4680057 | Brain_Nucleus_accumbens_basal_ganglia | 3 | RAP2B        | 152883147 | rs4679709  | 0.9332 | 153103018 | G | A | 0.43 | 5.10E-05 | 2.91E-02 | 6.83E-02 |
| rs4680057 | Brain_Nucleus_accumbens_basal_ganglia | 3 | RAP2B        | 152883147 | rs1018176  | 0.9332 | 153103636 | A | G | 0.43 | 4.96E-05 | 2.91E-02 | 6.81E-02 |
| rs4680057 | Brain_Nucleus_accumbens_basal_ganglia | 3 | RAP2B        | 152883147 | rs1018177  | 0.8535 | 153103714 | G | A | 0.48 | 1.88E-04 | 9.26E-03 | 5.29E-02 |
| rs4680057 | Brain_Nucleus_accumbens_basal_ganglia | 3 | RAP2B        | 152883147 | rs9864621  | 0.9294 | 153104577 | T | C | 0.43 | 2.99E-05 | 2.91E-02 | 6.64E-02 |
| rs4680057 | Brain_Nucleus_accumbens_basal_ganglia | 3 | RAP2B        | 152883147 | rs9815053  | 0.9332 | 153105128 | A | G | 0.43 | 4.62E-05 | 2.91E-02 | 6.76E-02 |
| rs4680057 | Brain_Nucleus_accumbens_basal_ganglia | 3 | RAP2B        | 152883147 | rs9815215  | 0.9332 | 153105380 | T | C | 0.43 | 2.97E-05 | 2.91E-02 | 6.52E-02 |
| rs4680057 | Brain_Nucleus_accumbens_basal_ganglia | 3 | RAP2B        | 152883147 | rs9835730  | 0.9332 | 153105773 | C | T | 0.43 | 4.71E-05 | 2.91E-02 | 6.77E-02 |
| rs4680057 | Brain_Nucleus_accumbens_basal_ganglia | 3 | RAP2B        | 152883147 | rs9819928  | 0.9332 | 153105912 | A | G | 0.43 | 4.07E-05 | 2.91E-02 | 6.73E-02 |
| rs4680057 | Brain_Nucleus_accumbens_basal_ganglia | 3 | RAP2B        | 152883147 | rs9858222  | 0.9332 | 153106464 | G | A | 0.43 | 4.24E-05 | 2.91E-02 | 6.74E-02 |
| rs4680057 | Brain_Nucleus_accumbens_basal_ganglia | 3 | RAP2B        | 152883147 | rs6777504  | 0.9294 | 153106837 | T | C | 0.43 | 3.60E-05 | 2.91E-02 | 6.69E-02 |
| rs4680057 | Brain_Nucleus_accumbens_basal_ganglia | 3 | RAP2B        | 152883147 | rs9831094  | 0.8535 | 153108239 | A | G | 0.48 | 1.61E-04 | 1.02E-02 | 5.34E-02 |
| rs4680057 | Brain_Nucleus_accumbens_basal_ganglia | 3 | RAP2B        | 152883147 | rs9831443  | 0.9332 | 153108551 | G | C | 0.43 | 3.66E-05 | 2.91E-02 | 6.70E-02 |
| rs4680057 | Brain_Nucleus_accumbens_basal_ganglia | 3 | RP11-38P22.2 | 152558203 | rs1827993  | 0.9294 | 153110407 | T | G | 0.43 | 7.17E-05 | 4.85E-02 | 9.00E-02 |
| rs4680057 | Brain_Nucleus_accumbens_basal_ganglia | 3 | RAP2B        | 152883147 | rs1827993  | 0.9294 | 153110407 | T | G | 0.43 | 7.17E-05 | 3.42E-02 | 7.43E-02 |
| rs4680057 | Brain_Nucleus_accumbens_basal_ganglia | 3 | RAP2B        | 152883147 | rs9862101  | 0.9332 | 153110559 | A | T | 0.43 | 3.66E-05 | 2.91E-02 | 6.70E-02 |
| rs4680057 | Brain_Nucleus_accumbens_basal_ganglia | 3 | RAP2B        | 152883147 | rs2135774  | 0.9332 | 153113202 | T | C | 0.43 | 4.33E-05 | 3.80E-02 | 7.77E-02 |
| rs4680057 | Brain_Nucleus_accumbens_basal_ganglia | 3 | RAP2B        | 152883147 | rs1580988  | 0.8573 | 153114027 | C | A | 0.48 | 2.19E-04 | 3.43E-03 | 3.99E-02 |
| rs4680057 | Brain_Nucleus_accumbens_basal_ganglia | 3 | RAP2B        | 152883147 | rs6790236  | 0.9331 | 153115590 | G | C | 0.43 | 4.20E-05 | 2.55E-02 | 6.20E-02 |



|           |                                       |   |              |           |            |        |           |   |   |      |          |          |          |
|-----------|---------------------------------------|---|--------------|-----------|------------|--------|-----------|---|---|------|----------|----------|----------|
| rs4680057 | Brain_Nucleus_accumbens_basal_ganglia | 3 | RAP2B        | 152883147 | rs6790408  | 0.9331 | 153115593 | A | G | 0.43 | 4.20E-05 | 2.55E-02 | 6.20E-02 |
| rs4680057 | Brain_Nucleus_accumbens_basal_ganglia | 3 | RAP2B        | 152883147 | rs3903613  | 0.8498 | 153116369 | C | T | 0.48 | 1.75E-04 | 5.85E-03 | 4.47E-02 |
| rs4680057 | Brain_Nucleus_accumbens_basal_ganglia | 3 | RP11-38P22.2 | 152558203 | rs9289909  | 0.9255 | 153116825 | C | G | 0.43 | 7.61E-05 | 4.85E-02 | 9.00E-02 |
| rs4680057 | Brain_Nucleus_accumbens_basal_ganglia | 3 | RAP2B        | 152883147 | rs9289909  | 0.9255 | 153116825 | C | G | 0.43 | 7.61E-05 | 3.42E-02 | 7.43E-02 |
| rs4680057 | Brain_Nucleus_accumbens_basal_ganglia | 3 | RAP2B        | 152883147 | rs6794116  | 0.8498 | 153116888 | A | G | 0.48 | 1.83E-04 | 9.49E-03 | 5.26E-02 |
| rs4680057 | Brain_Nucleus_accumbens_basal_ganglia | 3 | RAP2B        | 152883147 | rs9850272  | 0.9293 | 153116954 | A | C | 0.43 | 4.46E-05 | 2.04E-02 | 5.66E-02 |
| rs4680057 | Brain_Nucleus_accumbens_basal_ganglia | 3 | RAP2B        | 152883147 | rs9289910  | 0.9293 | 153117193 | G | A | 0.43 | 4.04E-05 | 2.55E-02 | 6.24E-02 |
| rs4680057 | Brain_Nucleus_accumbens_basal_ganglia | 3 | RAP2B        | 152883147 | rs1507160  | 0.8462 | 153117704 | G | A | 0.47 | 2.69E-04 | 8.07E-03 | 5.50E-02 |
| rs4680057 | Brain_Nucleus_accumbens_basal_ganglia | 3 | RAP2B        | 152883147 | rs10049279 | 0.8498 | 153118601 | A | G | 0.48 | 1.77E-04 | 8.80E-03 | 5.05E-02 |
| rs4680057 | Brain_Nucleus_accumbens_basal_ganglia | 3 | RAP2B        | 152883147 | rs4680059  | 0.8498 | 153118849 | A | G | 0.48 | 2.20E-04 | 3.72E-03 | 3.98E-02 |
| rs4680057 | Brain_Nucleus_accumbens_basal_ganglia | 3 | RAP2B        | 152883147 | rs12695988 | 0.9293 | 153122300 | A | C | 0.43 | 2.73E-05 | 3.65E-02 | 7.27E-02 |
| rs4680057 | Brain_Spinal_cord_cervical_c-1        | 3 | RP11-23D24.2 | 153400349 | rs4680056  | 0.9523 | 153096430 | G | A | 0.43 | 5.13E-05 | 2.15E-02 | 4.44E-02 |
| rs4680057 | Brain_Spinal_cord_cervical_c-1        | 3 | RP11-23D24.2 | 153400349 | rs13073679 | 0.9523 | 153096642 | T | C | 0.44 | 1.03E-03 | 1.47E-02 | 7.24E-02 |
| rs4680057 | Brain_Spinal_cord_cervical_c-1        | 3 | RP11-23D24.2 | 153400349 | rs9822507  | 0.9293 | 153096674 | C | G | 0.48 | 9.79E-02 | 1.11E-02 | 3.79E-02 |
| rs4680057 | Brain_Spinal_cord_cervical_c-1        | 3 | RP11-23D24.2 | 153400349 | rs4680057  | 1.0000 | 153096985 | A | G | 0.44 | 9.69E-07 | 1.51E-02 | 3.54E-02 |
| rs4680057 | Brain_Spinal_cord_cervical_c-1        | 3 | RP11-23D24.2 | 153400349 | rs7627262  | 0.9489 | 153097522 | T | C | 0.43 | 1.84E-05 | 1.11E-02 | 4.15E-02 |
| rs4680057 | Brain_Spinal_cord_cervical_c-1        | 3 | RP11-23D24.2 | 153400349 | rs7639345  | 0.9489 | 153097961 | C | T | 0.43 | 1.54E-05 | 1.11E-02 | 4.08E-02 |
| rs4680057 | Brain_Spinal_cord_cervical_c-1        | 3 | RP11-23D24.2 | 153400349 | rs2135773  | 0.9489 | 153098130 | T | C | 0.43 | 1.79E-05 | 1.11E-02 | 4.11E-02 |
| rs4680057 | Brain_Spinal_cord_cervical_c-1        | 3 | RP11-23D24.2 | 153400349 | rs1018179  | 0.9489 | 153098264 | C | T | 0.43 | 1.66E-05 | 1.11E-02 | 4.07E-02 |
| rs4680057 | Brain_Spinal_cord_cervical_c-1        | 3 | RP11-23D24.2 | 153400349 | rs9852688  | 0.9489 | 153098558 | C | T | 0.43 | 1.66E-05 | 1.11E-02 | 4.07E-02 |
| rs4680057 | Brain_Spinal_cord_cervical_c-1        | 3 | RP11-23D24.2 | 153400349 | rs955014   | 0.9451 | 153099380 | C | T | 0.43 | 1.37E-05 | 2.60E-02 | 5.88E-02 |
| rs4680057 | Brain_Spinal_cord_cervical_c-1        | 3 | RP11-23D24.2 | 153400349 | rs13091512 | 0.9451 | 153099518 | T | A | 0.43 | 1.76E-05 | 2.72E-02 | 6.19E-02 |
| rs4680057 | Brain_Spinal_cord_cervical_c-1        | 3 | RP11-23D24.2 | 153400349 | rs9843491  | 0.9412 | 153100477 | A | G | 0.43 | 2.01E-05 | 1.91E-02 | 5.23E-02 |
| rs4680057 | Brain_Spinal_cord_cervical_c-1        | 3 | RP11-23D24.2 | 153400349 | rs4679708  | 0.9372 | 153102867 | G | C | 0.43 | 4.96E-05 | 1.54E-02 | 5.02E-02 |
| rs4680057 | Brain_Spinal_cord_cervical_c-1        | 3 | RP11-23D24.2 | 153400349 | rs4679709  | 0.9332 | 153103018 | G | A | 0.43 | 5.10E-05 | 1.54E-02 | 5.04E-02 |
| rs4680057 | Brain_Spinal_cord_cervical_c-1        | 3 | RP11-23D24.2 | 153400349 | rs1018176  | 0.9332 | 153103636 | A | G | 0.43 | 4.96E-05 | 1.54E-02 | 5.02E-02 |
| rs4680057 | Brain_Spinal_cord_cervical_c-1        | 3 | RP11-23D24.2 | 153400349 | rs1018177  | 0.8535 | 153103714 | G | A | 0.48 | 1.88E-04 | 7.84E-03 | 5.02E-02 |
| rs4680057 | Brain_Spinal_cord_cervical_c-1        | 3 | RP11-23D24.2 | 153400349 | rs9864621  | 0.9294 | 153104577 | T | C | 0.43 | 2.99E-05 | 1.54E-02 | 4.86E-02 |
| rs4680057 | Brain_Spinal_cord_cervical_c-1        | 3 | RP11-23D24.2 | 153400349 | rs9815053  | 0.9332 | 153105128 | A | G | 0.43 | 4.62E-05 | 1.54E-02 | 4.98E-02 |
| rs4680057 | Brain_Spinal_cord_cervical_c-1        | 3 | RP11-23D24.2 | 153400349 | rs9815215  | 0.9332 | 153105380 | T | C | 0.43 | 2.97E-05 | 1.54E-02 | 4.75E-02 |
| rs4680057 | Brain_Spinal_cord_cervical_c-1        | 3 | RP11-23D24.2 | 153400349 | rs9835730  | 0.9332 | 153105773 | C | T | 0.43 | 4.71E-05 | 1.54E-02 | 4.99E-02 |
| rs4680057 | Brain_Spinal_cord_cervical_c-1        | 3 | RP11-23D24.2 | 153400349 | rs9819928  | 0.9332 | 153105912 | A | G | 0.43 | 4.07E-05 | 1.54E-02 | 4.95E-02 |
| rs4680057 | Brain_Spinal_cord_cervical_c-1        | 3 | RP11-23D24.2 | 153400349 | rs9858222  | 0.9332 | 153106464 | G | A | 0.43 | 4.24E-05 | 1.54E-02 | 4.95E-02 |
| rs4680057 | Brain_Spinal_cord_cervical_c-1        | 3 | RP11-23D24.2 | 153400349 | rs677504   | 0.9294 | 153106837 | T | C | 0.43 | 3.60E-05 | 1.54E-02 | 4.91E-02 |
| rs4680057 | Brain_Spinal_cord_cervical_c-1        | 3 | RP11-23D24.2 | 153400349 | rs9831094  | 0.8535 | 153108239 | A | G | 0.48 | 1.61E-04 | 7.84E-03 | 4.90E-02 |
| rs4680057 | Brain_Spinal_cord_cervical_c-1        | 3 | RP11-23D24.2 | 153400349 | rs9831443  | 0.9332 | 153108551 | G | C | 0.43 | 3.66E-05 | 1.54E-02 | 4.92E-02 |
| rs4680057 | Brain_Spinal_cord_cervical_c-1        | 3 | RP11-23D24.2 | 153400349 | rs1827993  | 0.9294 | 153110407 | T | G | 0.43 | 7.17E-05 | 3.27E-02 | 7.25E-02 |
| rs4680057 | Brain_Spinal_cord_cervical_c-1        | 3 | RP11-23D24.2 | 153400349 | rs9862101  | 0.9332 | 153110559 | A | T | 0.43 | 3.66E-05 | 1.54E-02 | 4.92E-02 |
| rs4680057 | Brain_Spinal_cord_cervical_c-1        | 3 | RP11-23D24.2 | 153400349 | rs2135774  | 0.9332 | 153113202 | T | C | 0.43 | 4.33E-05 | 1.69E-02 | 5.17E-02 |
| rs4680057 | Brain_Spinal_cord_cervical_c-1        | 3 | RP11-23D24.2 | 153400349 | rs1580988  | 0.8573 | 153114027 | C | A | 0.48 | 2.19E-04 | 8.81E-03 | 5.24E-02 |

|           |                                |   |              |           |            |        |           |   |   |      |          |          |          |
|-----------|--------------------------------|---|--------------|-----------|------------|--------|-----------|---|---|------|----------|----------|----------|
| rs4680057 | Brain_Spinal_cord_cervical_c-1 | 3 | RP11-23D24.2 | 153400349 | rs6790236  | 0.9331 | 153115590 | G | C | 0.43 | 4.20E-05 | 1.54E-02 | 4.85E-02 |
| rs4680057 | Brain_Spinal_cord_cervical_c-1 | 3 | RP11-23D24.2 | 153400349 | rs6790408  | 0.9331 | 153115593 | A | G | 0.43 | 4.20E-05 | 1.54E-02 | 4.85E-02 |
| rs4680057 | Brain_Spinal_cord_cervical_c-1 | 3 | RP11-23D24.2 | 153400349 | rs9289909  | 0.9255 | 153116825 | C | G | 0.43 | 7.61E-05 | 3.27E-02 | 7.26E-02 |
| rs4680057 | Brain_Spinal_cord_cervical_c-1 | 3 | RP11-23D24.2 | 153400349 | rs6794116  | 0.8498 | 153116888 | A | G | 0.48 | 1.83E-04 | 7.70E-03 | 4.91E-02 |
| rs4680057 | Brain_Spinal_cord_cervical_c-1 | 3 | RP11-23D24.2 | 153400349 | rs9850272  | 0.9293 | 153116954 | A | C | 0.43 | 4.46E-05 | 1.54E-02 | 4.96E-02 |
| rs4680057 | Brain_Spinal_cord_cervical_c-1 | 3 | RP11-23D24.2 | 153400349 | rs9289910  | 0.9293 | 153117193 | G | A | 0.43 | 4.04E-05 | 1.54E-02 | 4.90E-02 |
| rs4680057 | Brain_Spinal_cord_cervical_c-1 | 3 | RP11-23D24.2 | 153400349 | rs1507160  | 0.8462 | 153117704 | G | A | 0.47 | 2.69E-04 | 8.35E-03 | 5.56E-02 |
| rs4680057 | Brain_Spinal_cord_cervical_c-1 | 3 | RP11-23D24.2 | 153400349 | rs10049279 | 0.8498 | 153118601 | A | G | 0.48 | 1.77E-04 | 7.84E-03 | 4.86E-02 |
| rs4680057 | Brain_Spinal_cord_cervical_c-1 | 3 | RP11-23D24.2 | 153400349 | rs4680059  | 0.8498 | 153118849 | A | G | 0.48 | 2.20E-04 | 3.55E-02 | 8.81E-02 |
| rs4680057 | Brain_Spinal_cord_cervical_c-1 | 3 | RP11-23D24.2 | 153400349 | rs12695988 | 0.9293 | 153122300 | A | C | 0.43 | 2.73E-05 | 2.02E-02 | 5.30E-02 |
| rs4680057 | Brain_Substantia_nigra         | 3 | ARHGFEF26    | 153907204 | rs4680056  | 0.9523 | 153096430 | G | A | 0.43 | 5.13E-05 | 2.04E-02 | 4.31E-02 |
| rs4680057 | Brain_Substantia_nigra         | 3 | ARHGFEF26    | 153907204 | rs9822507  | 0.9293 | 153096674 | C | G | 0.48 | 9.79E-02 | 4.47E-02 | 7.95E-02 |
| rs4680057 | Brain_Substantia_nigra         | 3 | ARHGFEF26    | 153907204 | rs7627262  | 0.9489 | 153097522 | T | C | 0.43 | 1.84E-05 | 4.46E-02 | 8.33E-02 |
| rs4680057 | Brain_Substantia_nigra         | 3 | ARHGFEF26    | 153907204 | rs7639345  | 0.9489 | 153097961 | C | T | 0.43 | 1.54E-05 | 4.46E-02 | 8.26E-02 |
| rs4680057 | Brain_Substantia_nigra         | 3 | ARHGFEF26    | 153907204 | rs2135773  | 0.9489 | 153098130 | T | C | 0.43 | 1.79E-05 | 4.46E-02 | 8.29E-02 |
| rs4680057 | Brain_Substantia_nigra         | 3 | ARHGFEF26    | 153907204 | rs1018179  | 0.9489 | 153098264 | C | T | 0.43 | 1.66E-05 | 4.46E-02 | 8.25E-02 |
| rs4680057 | Brain_Substantia_nigra         | 3 | ARHGFEF26    | 153907204 | rs9852688  | 0.9489 | 153098558 | C | T | 0.43 | 1.66E-05 | 4.46E-02 | 8.25E-02 |
| rs4680057 | Brain_Substantia_nigra         | 3 | ARHGFEF26    | 153907204 | rs955014   | 0.9451 | 153099380 | C | T | 0.43 | 1.37E-05 | 3.95E-02 | 7.44E-02 |
| rs4680057 | Brain_Substantia_nigra         | 3 | ARHGFEF26    | 153907204 | rs13091512 | 0.9451 | 153099518 | T | A | 0.43 | 1.76E-05 | 2.36E-02 | 5.75E-02 |
| rs4680057 | Brain_Substantia_nigra         | 3 | ARHGFEF26    | 153907204 | rs9843491  | 0.9412 | 153100477 | A | G | 0.43 | 2.01E-05 | 3.95E-02 | 7.67E-02 |
| rs4680057 | Brain_Substantia_nigra         | 3 | ARHGFEF26    | 153907204 | rs4679708  | 0.9372 | 153102867 | G | C | 0.43 | 4.96E-05 | 3.95E-02 | 8.01E-02 |
| rs4680057 | Brain_Substantia_nigra         | 3 | ARHGFEF26    | 153907204 | rs4679709  | 0.9332 | 153103018 | G | A | 0.43 | 5.10E-05 | 3.95E-02 | 8.02E-02 |
| rs4680057 | Brain_Substantia_nigra         | 3 | ARHGFEF26    | 153907204 | rs1018176  | 0.9332 | 153103636 | A | G | 0.43 | 4.96E-05 | 3.95E-02 | 8.01E-02 |
| rs4680057 | Brain_Substantia_nigra         | 3 | ARHGFEF26    | 153907204 | rs9864621  | 0.9294 | 153104577 | T | C | 0.43 | 2.99E-05 | 3.95E-02 | 7.83E-02 |
| rs4680057 | Brain_Substantia_nigra         | 3 | ARHGFEF26    | 153907204 | rs9815053  | 0.9332 | 153105128 | A | G | 0.43 | 4.62E-05 | 3.95E-02 | 7.96E-02 |
| rs4680057 | Brain_Substantia_nigra         | 3 | ARHGFEF26    | 153907204 | rs9815215  | 0.9332 | 153105380 | T | C | 0.43 | 2.97E-05 | 3.95E-02 | 7.71E-02 |
| rs4680057 | Brain_Substantia_nigra         | 3 | ARHGFEF26    | 153907204 | rs9835730  | 0.9332 | 153105773 | C | T | 0.43 | 4.71E-05 | 3.95E-02 | 7.97E-02 |
| rs4680057 | Brain_Substantia_nigra         | 3 | ARHGFEF26    | 153907204 | rs9819928  | 0.9332 | 153105912 | A | G | 0.43 | 4.07E-05 | 3.95E-02 | 7.93E-02 |
| rs4680057 | Brain_Substantia_nigra         | 3 | ARHGFEF26    | 153907204 | rs9858222  | 0.9332 | 153106464 | G | A | 0.43 | 4.24E-05 | 3.95E-02 | 7.93E-02 |
| rs4680057 | Brain_Substantia_nigra         | 3 | ARHGFEF26    | 153907204 | rs6777504  | 0.9294 | 153106837 | T | C | 0.43 | 3.60E-05 | 3.95E-02 | 7.88E-02 |
| rs4680057 | Brain_Substantia_nigra         | 3 | ARHGFEF26    | 153907204 | rs9831443  | 0.9332 | 153108551 | G | C | 0.43 | 3.66E-05 | 3.95E-02 | 7.89E-02 |
| rs4680057 | Brain_Substantia_nigra         | 3 | ARHGFEF26    | 153907204 | rs9862101  | 0.9332 | 153110559 | A | T | 0.43 | 3.66E-05 | 4.04E-02 | 7.99E-02 |
| rs4680057 | Brain_Substantia_nigra         | 3 | ARHGFEF26    | 153907204 | rs2135774  | 0.9332 | 153113202 | T | C | 0.43 | 4.33E-05 | 3.49E-02 | 7.42E-02 |
| rs4680057 | Brain_Substantia_nigra         | 3 | ARHGFEF26    | 153907204 | rs6790236  | 0.9331 | 153115590 | G | C | 0.43 | 4.20E-05 | 3.95E-02 | 7.83E-02 |
| rs4680057 | Brain_Substantia_nigra         | 3 | ARHGFEF26    | 153907204 | rs6790408  | 0.9331 | 153115593 | A | G | 0.43 | 4.20E-05 | 3.95E-02 | 7.83E-02 |
| rs4680057 | Brain_Substantia_nigra         | 3 | ARHGFEF26    | 153907204 | rs9850272  | 0.9293 | 153116954 | A | C | 0.43 | 4.46E-05 | 2.81E-02 | 6.62E-02 |
| rs4680057 | Brain_Substantia_nigra         | 3 | ARHGFEF26    | 153907204 | rs9289910  | 0.9293 | 153117193 | G | A | 0.43 | 4.04E-05 | 3.95E-02 | 7.87E-02 |
| rs4680057 | Whole_Blood                    | 3 | ARHGFEF26    | 153907204 | rs4680056  | 0.9523 | 153096430 | G | A | 0.43 | 5.13E-05 | 1.16E-03 | 1.06E-02 |
| rs4680057 | Whole_Blood                    | 3 | ARHGFEF26    | 153907204 | rs13073679 | 0.9523 | 153096642 | T | C | 0.44 | 1.03E-03 | 1.53E-03 | 4.18E-02 |
| rs4680057 | Whole_Blood                    | 3 | ARHGFEF26    | 153907204 | rs9822507  | 0.9293 | 153096674 | C | G | 0.48 | 9.79E-02 | 1.09E-03 | 1.55E-02 |

|            |                |    |          |           |            |        |           |   |   |      |          |          |          |
|------------|----------------|----|----------|-----------|------------|--------|-----------|---|---|------|----------|----------|----------|
| rs4680057  | Whole_Blood    | 3  | ARHGEF26 | 153907204 | rs4680057  | 1.0000 | 153096985 | A | G | 0.44 | 9.69E-07 | 1.31E-03 | 1.07E-02 |
| rs4680057  | Whole_Blood    | 3  | ARHGEF26 | 153907204 | rs7627262  | 0.9489 | 153097522 | T | C | 0.43 | 1.84E-05 | 4.44E-04 | 1.43E-02 |
| rs4680057  | Whole_Blood    | 3  | ARHGEF26 | 153907204 | rs7639345  | 0.9489 | 153097961 | C | T | 0.43 | 1.54E-05 | 5.79E-04 | 1.48E-02 |
| rs4680057  | Whole_Blood    | 3  | ARHGEF26 | 153907204 | rs2135773  | 0.9489 | 153098130 | T | C | 0.43 | 1.79E-05 | 7.72E-04 | 1.62E-02 |
| rs4680057  | Whole_Blood    | 3  | ARHGEF26 | 153907204 | rs1018179  | 0.9489 | 153098264 | C | T | 0.43 | 1.66E-05 | 5.79E-04 | 1.47E-02 |
| rs4680057  | Whole_Blood    | 3  | ARHGEF26 | 153907204 | rs9852688  | 0.9489 | 153098558 | C | T | 0.43 | 1.66E-05 | 5.45E-04 | 1.45E-02 |
| rs4680057  | Whole_Blood    | 3  | ARHGEF26 | 153907204 | rs955014   | 0.9451 | 153099380 | C | T | 0.43 | 1.37E-05 | 6.59E-04 | 1.37E-02 |
| rs4680057  | Whole_Blood    | 3  | ARHGEF26 | 153907204 | rs13091512 | 0.9451 | 153099518 | T | A | 0.43 | 1.76E-05 | 1.26E-03 | 1.77E-02 |
| rs4680057  | Whole_Blood    | 3  | ARHGEF26 | 153907204 | rs9843491  | 0.9412 | 153100477 | A | G | 0.43 | 2.01E-05 | 6.08E-04 | 1.48E-02 |
| rs4680057  | Whole_Blood    | 3  | ARHGEF26 | 153907204 | rs4679708  | 0.9372 | 153102867 | G | C | 0.43 | 4.96E-05 | 6.18E-04 | 1.71E-02 |
| rs4680057  | Whole_Blood    | 3  | ARHGEF26 | 153907204 | rs4679709  | 0.9332 | 153103018 | G | A | 0.43 | 5.10E-05 | 5.40E-04 | 1.67E-02 |
| rs4680057  | Whole_Blood    | 3  | ARHGEF26 | 153907204 | rs1018176  | 0.9332 | 153103636 | A | G | 0.43 | 4.96E-05 | 7.23E-04 | 1.78E-02 |
| rs4680057  | Whole_Blood    | 3  | ARHGEF26 | 153907204 | rs1018177  | 0.8535 | 153103714 | G | A | 0.48 | 1.88E-04 | 2.90E-03 | 3.79E-02 |
| rs4680057  | Whole_Blood    | 3  | ARHGEF26 | 153907204 | rs9864621  | 0.9294 | 153104577 | T | C | 0.43 | 2.99E-05 | 7.23E-04 | 1.66E-02 |
| rs4680057  | Whole_Blood    | 3  | ARHGEF26 | 153907204 | rs9815053  | 0.9332 | 153105128 | A | G | 0.43 | 4.62E-05 | 7.23E-04 | 1.75E-02 |
| rs4680057  | Whole_Blood    | 3  | ARHGEF26 | 153907204 | rs9815215  | 0.9332 | 153105380 | T | C | 0.43 | 2.97E-05 | 7.31E-04 | 1.59E-02 |
| rs4680057  | Whole_Blood    | 3  | ARHGEF26 | 153907204 | rs9835730  | 0.9332 | 153105773 | C | T | 0.43 | 4.71E-05 | 7.23E-04 | 1.76E-02 |
| rs4680057  | Whole_Blood    | 3  | ARHGEF26 | 153907204 | rs9819928  | 0.9332 | 153105912 | A | G | 0.43 | 4.07E-05 | 7.23E-04 | 1.73E-02 |
| rs4680057  | Whole_Blood    | 3  | ARHGEF26 | 153907204 | rs9858222  | 0.9332 | 153106464 | G | A | 0.43 | 4.24E-05 | 5.86E-04 | 1.64E-02 |
| rs4680057  | Whole_Blood    | 3  | ARHGEF26 | 153907204 | rs6777504  | 0.9294 | 153106837 | T | C | 0.43 | 3.60E-05 | 7.23E-04 | 1.69E-02 |
| rs4680057  | Whole_Blood    | 3  | ARHGEF26 | 153907204 | rs9831094  | 0.8535 | 153108239 | A | G | 0.48 | 1.61E-04 | 3.02E-03 | 3.72E-02 |
| rs4680057  | Whole_Blood    | 3  | ARHGEF26 | 153907204 | rs9831443  | 0.9332 | 153108551 | G | C | 0.43 | 3.66E-05 | 7.23E-04 | 1.70E-02 |
| rs4680057  | Whole_Blood    | 3  | ARHGEF26 | 153907204 | rs1827993  | 0.9294 | 153110407 | T | G | 0.43 | 7.17E-05 | 9.90E-04 | 1.95E-02 |
| rs4680057  | Whole_Blood    | 3  | ARHGEF26 | 153907204 | rs9862101  | 0.9332 | 153110559 | A | T | 0.43 | 3.66E-05 | 6.78E-04 | 1.67E-02 |
| rs4680057  | Whole_Blood    | 3  | ARHGEF26 | 153907204 | rs2135774  | 0.9332 | 153113202 | T | C | 0.43 | 4.33E-05 | 7.60E-04 | 1.75E-02 |
| rs4680057  | Whole_Blood    | 3  | ARHGEF26 | 153907204 | rs1580988  | 0.8573 | 153114027 | C | A | 0.48 | 2.19E-04 | 4.59E-03 | 4.31E-02 |
| rs4680057  | Whole_Blood    | 3  | ARHGEF26 | 153907204 | rs6790236  | 0.9331 | 153115590 | G | C | 0.43 | 4.20E-05 | 5.24E-04 | 1.52E-02 |
| rs4680057  | Whole_Blood    | 3  | ARHGEF26 | 153907204 | rs6790408  | 0.9331 | 153115593 | A | G | 0.43 | 4.20E-05 | 5.24E-04 | 1.52E-02 |
| rs4680057  | Whole_Blood    | 3  | ARHGEF26 | 153907204 | rs3903613  | 0.8498 | 153116369 | C | T | 0.48 | 1.75E-04 | 1.61E-03 | 3.18E-02 |
| rs4680057  | Whole_Blood    | 3  | ARHGEF26 | 153907204 | rs9289909  | 0.9255 | 153116825 | C | G | 0.43 | 7.61E-05 | 8.92E-04 | 1.89E-02 |
| rs4680057  | Whole_Blood    | 3  | ARHGEF26 | 153907204 | rs6794116  | 0.8498 | 153116888 | A | G | 0.48 | 1.83E-04 | 2.72E-03 | 3.65E-02 |
| rs4680057  | Whole_Blood    | 3  | ARHGEF26 | 153907204 | rs9850272  | 0.9293 | 153116954 | A | C | 0.43 | 4.46E-05 | 1.11E-03 | 1.94E-02 |
| rs4680057  | Whole_Blood    | 3  | ARHGEF26 | 153907204 | rs9289910  | 0.9293 | 153117193 | G | A | 0.43 | 4.04E-05 | 5.97E-04 | 1.61E-02 |
| rs4680057  | Whole_Blood    | 3  | ARHGEF26 | 153907204 | rs1507160  | 0.8462 | 153117704 | G | A | 0.47 | 2.69E-04 | 3.41E-03 | 4.37E-02 |
| rs4680057  | Whole_Blood    | 3  | ARHGEF26 | 153907204 | rs10049279 | 0.8498 | 153118601 | A | G | 0.48 | 1.77E-04 | 1.73E-03 | 3.20E-02 |
| rs4680057  | Whole_Blood    | 3  | ARHGEF26 | 153907204 | rs4680059  | 0.8498 | 153118849 | A | G | 0.48 | 2.20E-04 | 1.66E-03 | 3.25E-02 |
| rs4680057  | Whole_Blood    | 3  | ARHGEF26 | 153907204 | rs12695988 | 0.9293 | 153122300 | A | C | 0.43 | 2.73E-05 | 1.43E-03 | 1.85E-02 |
| rs12908891 | Brain_Amygdala | 15 | RAB8B    | 63520824  | rs1460544  | 0.8736 | 64201766  | T | C | 0.51 | 9.06E-04 | 4.32E-02 | 1.61E-01 |
| rs12908891 | Brain_Amygdala | 15 | SNX22    | 64446798  | rs1460544  | 0.8736 | 64201766  | T | C | 0.51 | 9.06E-04 | 3.81E-02 | 1.56E-01 |
| rs12908891 | Brain_Amygdala | 15 | APH1B    | 63584771  | rs1037846  | 0.8696 | 64204870  | G | A | 0.51 | 6.33E-04 | 2.95E-02 | 6.06E-02 |

|            |                |    |       |          |             |        |          |   |   |      |          |          |          |
|------------|----------------|----|-------|----------|-------------|--------|----------|---|---|------|----------|----------|----------|
| rs12908891 | Brain_Amygdala | 15 | SNX22 | 64446798 | rs1037846   | 0.8696 | 64204870 | G | A | 0.51 | 6.33E-04 | 4.99E-02 | 8.31E-02 |
| rs12908891 | Brain_Amygdala | 15 | RAB8B | 63520824 | rs11071773  | 0.8883 | 64206765 | A | G | 0.51 | 8.95E-04 | 4.27E-02 | 1.34E-01 |
| rs12908891 | Brain_Amygdala | 15 | RAB8B | 63520824 | rs12909081  | 0.8809 | 64208260 | A | C | 0.51 | 1.00E-03 | 4.27E-02 | 1.38E-01 |
| rs12908891 | Brain_Amygdala | 15 | RAB8B | 63520824 | rs2414844   | 0.8846 | 64210675 | A | G | 0.51 | 9.01E-04 | 4.27E-02 | 1.35E-01 |
| rs12908891 | Brain_Amygdala | 15 | RAB8B | 63520824 | rs12592060  | 0.8846 | 64210780 | T | C | 0.51 | 9.01E-04 | 4.27E-02 | 1.35E-01 |
| rs12908891 | Brain_Amygdala | 15 | RAB8B | 63520824 | rs1471282   | 0.8846 | 64212275 | G | T | 0.51 | 1.07E-03 | 4.27E-02 | 1.41E-01 |
| rs12908891 | Brain_Amygdala | 15 | RAB8B | 63520824 | rs11635779  | 0.8808 | 64213826 | T | C | 0.50 | 6.34E-05 | 4.37E-02 | 8.57E-02 |
| rs12908891 | Brain_Amygdala | 15 | RAB8B | 63520824 | rs12904374  | 0.8808 | 64214670 | T | A | 0.51 | 8.63E-04 | 4.37E-02 | 7.92E-02 |
| rs12908891 | Brain_Amygdala | 15 | APH1B | 63584771 | rs920762    | 0.9379 | 64214954 | C | G | 0.47 | 1.24E-05 | 3.48E-02 | 5.47E-02 |
| rs12908891 | Brain_Amygdala | 15 | RAB8B | 63520824 | rs12907405  | 0.8884 | 64220046 | T | C | 0.50 | 4.35E-05 | 1.55E-02 | 4.87E-02 |
| rs12908891 | Brain_Amygdala | 15 | RAB8B | 63520824 | rs11071775  | 0.8808 | 64220995 | A | G | 0.50 | 4.81E-05 | 1.39E-02 | 4.65E-02 |
| rs12908891 | Brain_Amygdala | 15 | RAB8B | 63520824 | rs11071776  | 0.8808 | 64221010 | T | A | 0.50 | 5.49E-05 | 1.39E-02 | 4.74E-02 |
| rs12908891 | Brain_Amygdala | 15 | RAB8B | 63520824 | rs11637858  | 0.8959 | 64224107 | C | T | 0.49 | 4.60E-05 | 9.55E-03 | 3.91E-02 |
| rs12908891 | Brain_Amygdala | 15 | RAB8B | 63520824 | rs12916395  | 0.9921 | 64225563 | T | C | 0.51 | 1.86E-06 | 2.38E-02 | 3.98E-02 |
| rs12908891 | Brain_Amygdala | 15 | RAB8B | 63520824 | rs11630587  | 0.9921 | 64225908 | C | T | 0.51 | 1.77E-06 | 2.04E-02 | 3.57E-02 |
| rs12908891 | Brain_Amygdala | 15 | APH1B | 63584771 | rs11630587  | 0.9921 | 64225908 | C | T | 0.51 | 1.77E-06 | 4.56E-02 | 6.38E-02 |
| rs12908891 | Brain_Amygdala | 15 | RAB8B | 63520824 | rs4776677   | 0.9921 | 64227044 | C | T | 0.51 | 1.54E-06 | 1.04E-02 | 2.27E-02 |
| rs12908891 | Brain_Amygdala | 15 | APH1B | 63584771 | rs4776677   | 0.9921 | 64227044 | C | T | 0.51 | 1.54E-06 | 3.82E-02 | 5.57E-02 |
| rs12908891 | Brain_Amygdala | 15 | RAB8B | 63520824 | rs11071777  | 0.8557 | 64229285 | C | G | 0.55 | 9.20E-06 | 4.65E-02 | 6.74E-02 |
| rs12908891 | Brain_Amygdala | 15 | APH1B | 63584771 | rs11071777  | 0.8557 | 64229285 | C | G | 0.55 | 9.20E-06 | 8.73E-03 | 2.25E-02 |
| rs12908891 | Brain_Amygdala | 15 | SNX1  | 64412305 | rs11071777  | 0.8557 | 64229285 | C | G | 0.55 | 9.20E-06 | 3.31E-02 | 5.29E-02 |
| rs12908891 | Brain_Amygdala | 15 | RAB8B | 63520824 | rs1563886   | 0.9272 | 64230852 | G | C | 0.49 | 8.06E-06 | 9.14E-03 | 4.12E-02 |
| rs12908891 | Brain_Amygdala | 15 | RAB8B | 63520824 | rs10744961  | 0.9960 | 64230930 | A | G | 0.51 | 1.86E-06 | 2.04E-02 | 3.61E-02 |
| rs12908891 | Brain_Amygdala | 15 | APH1B | 63584771 | rs10744961  | 0.9960 | 64230930 | A | G | 0.51 | 1.86E-06 | 4.56E-02 | 6.42E-02 |
| rs12908891 | Brain_Amygdala | 15 | RAB8B | 63520824 | rs6494454   | 0.8031 | 64233563 | A | C | 0.56 | 2.52E-05 | 7.44E-03 | 2.37E-02 |
| rs12908891 | Brain_Amygdala | 15 | RAB8B | 63520824 | rs894660    | 0.8031 | 64234334 | C | T | 0.56 | 2.52E-05 | 7.44E-03 | 2.37E-02 |
| rs12908891 | Brain_Amygdala | 15 | RAB8B | 63520824 | rs4776266   | 0.8031 | 64236175 | G | T | 0.56 | 2.23E-05 | 7.44E-03 | 2.35E-02 |
| rs12908891 | Brain_Amygdala | 15 | RAB8B | 63520824 | rs4776268   | 1.0000 | 64236398 | A | G | 0.51 | 6.19E-06 | 1.47E-02 | 6.59E-02 |
| rs12908891 | Brain_Amygdala | 15 | RAB8B | 63520824 | rs12908891  | 1.0000 | 64236441 | A | G | 0.52 | 1.39E-06 | 1.98E-02 | 3.51E-02 |
| rs12908891 | Brain_Amygdala | 15 | RAB8B | 63520824 | rs11071779  | 0.9881 | 64239044 | G | A | 0.51 | 1.57E-06 | 1.84E-02 | 3.39E-02 |
| rs12908891 | Brain_Amygdala | 15 | RAB8B | 63520824 | rs11071780  | 0.9842 | 64241691 | A | G | 0.51 | 4.74E-06 | 2.04E-02 | 7.68E-02 |
| rs12908891 | Brain_Amygdala | 15 | RAB8B | 63520824 | rs11854537  | 0.9842 | 64241733 | A | G | 0.51 | 4.74E-06 | 2.04E-02 | 7.68E-02 |
| rs12908891 | Brain_Amygdala | 15 | RAB8B | 63520824 | rs1380844   | 0.9881 | 64242007 | G | T | 0.51 | 4.74E-06 | 2.04E-02 | 7.68E-02 |
| rs12908891 | Brain_Amygdala | 15 | RAB8B | 63520824 | rs12916806  | 0.9881 | 64242770 | C | A | 0.51 | 4.64E-06 | 2.04E-02 | 7.67E-02 |
| rs12908891 | Brain_Amygdala | 15 | RAB8B | 63520824 | rs11071781  | 0.9195 | 64243933 | G | A | 0.49 | 4.75E-06 | 1.35E-02 | 4.98E-02 |
| rs12908891 | Brain_Amygdala | 15 | RAB8B | 63520824 | rs1304365   | 0.9881 | 64245946 | A | G | 0.51 | 4.67E-06 | 2.04E-02 | 7.68E-02 |
| rs12908891 | Brain_Amygdala | 15 | RAB8B | 63520824 | rs115415409 | 0.8420 | 64249559 | T | C | 0.45 | 1.45E-05 | 2.48E-02 | 4.97E-02 |
| rs12908891 | Brain_Amygdala | 15 | USP3  | 63841816 | rs115415409 | 0.8420 | 64249559 | T | C | 0.45 | 1.45E-05 | 3.30E-02 | 5.93E-02 |
| rs12908891 | Brain_Amygdala | 15 | RAB8B | 63520824 | rs145159458 | 0.9119 | 64252880 | T | C | 0.49 | 1.21E-05 | 1.30E-02 | 5.94E-02 |
| rs12908891 | Brain_Amygdala | 15 | RAB8B | 63520824 | rs4776692   | 0.9881 | 64255083 | G | A | 0.50 | 1.06E-05 | 2.04E-02 | 8.61E-02 |

|            |                                      |    |       |          |            |        |          |   |   |      |          |          |          |
|------------|--------------------------------------|----|-------|----------|------------|--------|----------|---|---|------|----------|----------|----------|
| rs12908891 | Brain_Amygdala                       | 15 | RAB8B | 63520824 | rs28822416 | 0.8420 | 64257845 | C | T | 0.45 | 1.54E-05 | 3.76E-02 | 6.47E-02 |
| rs12908891 | Brain_Amygdala                       | 15 | RAB8B | 63520824 | rs8035776  | 0.8420 | 64258018 | G | A | 0.45 | 1.54E-05 | 3.76E-02 | 6.47E-02 |
| rs12908891 | Brain_Amygdala                       | 15 | RAB8B | 63520824 | rs6494456  | 0.8381 | 64258260 | C | T | 0.45 | 1.54E-05 | 3.76E-02 | 6.47E-02 |
| rs12908891 | Brain_Amygdala                       | 15 | RAB8B | 63520824 | rs4776695  | 0.8350 | 64259115 | T | C | 0.46 | 9.12E-06 | 1.47E-02 | 3.42E-02 |
| rs12908891 | Brain_Amygdala                       | 15 | OAZ2  | 64987626 | rs4776695  | 0.8350 | 64259115 | T | C | 0.46 | 9.12E-06 | 4.57E-02 | 7.03E-02 |
| rs12908891 | Brain_Anterior_cingulate_cortex_BA24 | 15 | HERC1 | 64013479 | rs1460544  | 0.8736 | 64201766 | T | C | 0.51 | 9.06E-04 | 1.95E-04 | 8.49E-02 |
| rs12908891 | Brain_Anterior_cingulate_cortex_BA24 | 15 | DAPK2 | 64281733 | rs1460544  | 0.8736 | 64201766 | T | C | 0.51 | 9.06E-04 | 5.55E-03 | 1.12E-01 |
| rs12908891 | Brain_Anterior_cingulate_cortex_BA24 | 15 | HERC1 | 64013479 | rs1037846  | 0.8696 | 64204870 | G | A | 0.51 | 6.33E-04 | 7.97E-05 | 6.94E-03 |
| rs12908891 | Brain_Anterior_cingulate_cortex_BA24 | 15 | DAPK2 | 64281733 | rs1037846  | 0.8696 | 64204870 | G | A | 0.51 | 6.33E-04 | 2.20E-03 | 1.83E-02 |
| rs12908891 | Brain_Anterior_cingulate_cortex_BA24 | 15 | HERC1 | 64013479 | rs11071773 | 0.8883 | 64206765 | A | G | 0.51 | 8.95E-04 | 9.19E-05 | 5.36E-02 |
| rs12908891 | Brain_Anterior_cingulate_cortex_BA24 | 15 | DAPK2 | 64281733 | rs11071773 | 0.8883 | 64206765 | A | G | 0.51 | 8.95E-04 | 3.05E-03 | 7.57E-02 |
| rs12908891 | Brain_Anterior_cingulate_cortex_BA24 | 15 | HERC1 | 64013479 | rs12909081 | 0.8809 | 64208260 | A | C | 0.51 | 1.00E-03 | 9.19E-05 | 5.74E-02 |
| rs12908891 | Brain_Anterior_cingulate_cortex_BA24 | 15 | DAPK2 | 64281733 | rs12909081 | 0.8809 | 64208260 | A | C | 0.51 | 1.00E-03 | 3.05E-03 | 7.96E-02 |
| rs12908891 | Brain_Anterior_cingulate_cortex_BA24 | 15 | HERC1 | 64013479 | rs749468   | 0.9493 | 64210279 | T | C | 0.53 | 2.79E-04 | 9.14E-05 | 6.88E-03 |
| rs12908891 | Brain_Anterior_cingulate_cortex_BA24 | 15 | DAPK2 | 64281733 | rs749468   | 0.9493 | 64210279 | T | C | 0.53 | 2.79E-04 | 4.56E-03 | 2.39E-02 |
| rs12908891 | Brain_Anterior_cingulate_cortex_BA24 | 15 | HERC1 | 64013479 | rs2414844  | 0.8846 | 64210675 | A | G | 0.51 | 9.01E-04 | 9.19E-05 | 5.44E-02 |
| rs12908891 | Brain_Anterior_cingulate_cortex_BA24 | 15 | DAPK2 | 64281733 | rs2414844  | 0.8846 | 64210675 | A | G | 0.51 | 9.01E-04 | 3.05E-03 | 7.65E-02 |
| rs12908891 | Brain_Anterior_cingulate_cortex_BA24 | 15 | HERC1 | 64013479 | rs12592060 | 0.8846 | 64210780 | T | C | 0.51 | 9.01E-04 | 9.19E-05 | 5.44E-02 |
| rs12908891 | Brain_Anterior_cingulate_cortex_BA24 | 15 | DAPK2 | 64281733 | rs12592060 | 0.8846 | 64210780 | T | C | 0.51 | 9.01E-04 | 3.05E-03 | 7.65E-02 |
| rs12908891 | Brain_Anterior_cingulate_cortex_BA24 | 15 | HERC1 | 64013479 | rs1471282  | 0.8846 | 64212275 | G | T | 0.51 | 1.07E-03 | 9.19E-05 | 6.07E-02 |
| rs12908891 | Brain_Anterior_cingulate_cortex_BA24 | 15 | DAPK2 | 64281733 | rs1471282  | 0.8846 | 64212275 | G | T | 0.51 | 1.07E-03 | 3.05E-03 | 8.30E-02 |
| rs12908891 | Brain_Anterior_cingulate_cortex_BA24 | 15 | HERC1 | 64013479 | rs11635779 | 0.8808 | 64213826 | T | C | 0.50 | 6.34E-05 | 9.33E-05 | 1.20E-02 |
| rs12908891 | Brain_Anterior_cingulate_cortex_BA24 | 15 | DAPK2 | 64281733 | rs11635779 | 0.8808 | 64213826 | T | C | 0.50 | 6.34E-05 | 1.83E-03 | 2.38E-02 |
| rs12908891 | Brain_Anterior_cingulate_cortex_BA24 | 15 | HERC1 | 64013479 | rs12904374 | 0.8808 | 64214670 | T | A | 0.51 | 8.63E-04 | 9.33E-05 | 8.48E-03 |
| rs12908891 | Brain_Anterior_cingulate_cortex_BA24 | 15 | DAPK2 | 64281733 | rs12904374 | 0.8808 | 64214670 | T | A | 0.51 | 8.63E-04 | 1.83E-03 | 1.90E-02 |
| rs12908891 | Brain_Anterior_cingulate_cortex_BA24 | 15 | HERC1 | 64013479 | rs920762   | 0.9379 | 64214954 | C | G | 0.47 | 1.24E-05 | 6.51E-05 | 2.47E-03 |
| rs12908891 | Brain_Anterior_cingulate_cortex_BA24 | 15 | DAPK2 | 64281733 | rs920762   | 0.9379 | 64214954 | C | G | 0.47 | 1.24E-05 | 3.38E-03 | 1.32E-02 |
| rs12908891 | Brain_Anterior_cingulate_cortex_BA24 | 15 | HERC1 | 64013479 | rs11853632 | 0.8921 | 64217845 | C | G | 0.50 | 4.21E-05 | 3.66E-05 | 8.59E-03 |
| rs12908891 | Brain_Anterior_cingulate_cortex_BA24 | 15 | DAPK2 | 64281733 | rs11853632 | 0.8921 | 64217845 | C | G | 0.50 | 4.21E-05 | 1.62E-03 | 2.06E-02 |
| rs12908891 | Brain_Anterior_cingulate_cortex_BA24 | 15 | HERC1 | 64013479 | rs12907405 | 0.8884 | 64220046 | T | C | 0.50 | 4.35E-05 | 9.19E-05 | 1.03E-02 |
| rs12908891 | Brain_Anterior_cingulate_cortex_BA24 | 15 | DAPK2 | 64281733 | rs12907405 | 0.8884 | 64220046 | T | C | 0.50 | 4.35E-05 | 3.05E-03 | 2.56E-02 |
| rs12908891 | Brain_Anterior_cingulate_cortex_BA24 | 15 | HERC1 | 64013479 | rs11071775 | 0.8808 | 64220995 | A | G | 0.50 | 4.81E-05 | 9.19E-05 | 1.04E-02 |
| rs12908891 | Brain_Anterior_cingulate_cortex_BA24 | 15 | DAPK2 | 64281733 | rs11071775 | 0.8808 | 64220995 | A | G | 0.50 | 4.81E-05 | 3.05E-03 | 2.56E-02 |
| rs12908891 | Brain_Anterior_cingulate_cortex_BA24 | 15 | HERC1 | 64013479 | rs11071776 | 0.8808 | 64221010 | T | A | 0.50 | 5.49E-05 | 9.19E-05 | 1.09E-02 |
| rs12908891 | Brain_Anterior_cingulate_cortex_BA24 | 15 | DAPK2 | 64281733 | rs11071776 | 0.8808 | 64221010 | T | A | 0.50 | 5.49E-05 | 3.05E-03 | 2.64E-02 |
| rs12908891 | Brain_Anterior_cingulate_cortex_BA24 | 15 | HERC1 | 64013479 | rs11637858 | 0.8959 | 64224107 | C | T | 0.49 | 4.60E-05 | 7.76E-05 | 9.83E-03 |
| rs12908891 | Brain_Anterior_cingulate_cortex_BA24 | 15 | DAPK2 | 64281733 | rs11637858 | 0.8959 | 64224107 | C | T | 0.49 | 4.60E-05 | 6.06E-03 | 3.25E-02 |
| rs12908891 | Brain_Anterior_cingulate_cortex_BA24 | 15 | HERC1 | 64013479 | rs12916395 | 0.9921 | 64225563 | T | C | 0.51 | 1.86E-06 | 8.12E-05 | 2.05E-03 |
| rs12908891 | Brain_Anterior_cingulate_cortex_BA24 | 15 | DAPK2 | 64281733 | rs12916395 | 0.9921 | 64225563 | T | C | 0.51 | 1.86E-06 | 1.19E-02 | 2.49E-02 |
| rs12908891 | Brain_Anterior_cingulate_cortex_BA24 | 15 | HERC1 | 64013479 | rs11630587 | 0.9921 | 64225908 | C | T | 0.51 | 1.77E-06 | 2.48E-04 | 3.21E-03 |

|            |                                      |    |       |          |             |        |          |   |   |      |          |          |          |
|------------|--------------------------------------|----|-------|----------|-------------|--------|----------|---|---|------|----------|----------|----------|
| rs12908891 | Brain_Anterior_cingulate_cortex_BA24 | 15 | DAPK2 | 64281733 | rs11630587  | 0.9921 | 64225908 | C | T | 0.51 | 1.77E-06 | 1.59E-02 | 3.01E-02 |
| rs12908891 | Brain_Anterior_cingulate_cortex_BA24 | 15 | HERC1 | 64013479 | rs4776677   | 0.9921 | 64227044 | C | T | 0.51 | 1.54E-06 | 5.11E-05 | 1.68E-03 |
| rs12908891 | Brain_Anterior_cingulate_cortex_BA24 | 15 | DAPK2 | 64281733 | rs4776677   | 0.9921 | 64227044 | C | T | 0.51 | 1.54E-06 | 1.03E-02 | 2.26E-02 |
| rs12908891 | Brain_Anterior_cingulate_cortex_BA24 | 15 | HERC1 | 64013479 | rs11071777  | 0.8557 | 64229285 | C | G | 0.55 | 9.20E-06 | 5.29E-06 | 1.17E-03 |
| rs12908891 | Brain_Anterior_cingulate_cortex_BA24 | 15 | DAPK2 | 64281733 | rs11071777  | 0.8557 | 64229285 | C | G | 0.55 | 9.20E-06 | 3.21E-02 | 5.18E-02 |
| rs12908891 | Brain_Anterior_cingulate_cortex_BA24 | 15 | HERC1 | 64013479 | rs1563886   | 0.9272 | 64230852 | G | C | 0.49 | 8.06E-06 | 9.64E-05 | 1.20E-02 |
| rs12908891 | Brain_Anterior_cingulate_cortex_BA24 | 15 | DAPK2 | 64281733 | rs1563886   | 0.9272 | 64230852 | G | C | 0.49 | 8.06E-06 | 9.08E-03 | 4.11E-02 |
| rs12908891 | Brain_Anterior_cingulate_cortex_BA24 | 15 | HERC1 | 64013479 | rs10744961  | 0.9960 | 64230930 | A | G | 0.51 | 1.86E-06 | 5.11E-05 | 1.80E-03 |
| rs12908891 | Brain_Anterior_cingulate_cortex_BA24 | 15 | DAPK2 | 64281733 | rs10744961  | 0.9960 | 64230930 | A | G | 0.51 | 1.86E-06 | 1.03E-02 | 2.31E-02 |
| rs12908891 | Brain_Anterior_cingulate_cortex_BA24 | 15 | HERC1 | 64013479 | rs6494454   | 0.8031 | 64233563 | A | C | 0.56 | 2.52E-05 | 1.61E-03 | 1.14E-02 |
| rs12908891 | Brain_Anterior_cingulate_cortex_BA24 | 15 | HERC1 | 64013479 | rs894660    | 0.8031 | 64234334 | C | T | 0.56 | 2.52E-05 | 1.61E-03 | 1.14E-02 |
| rs12908891 | Brain_Anterior_cingulate_cortex_BA24 | 15 | HERC1 | 64013479 | rs4776266   | 0.8031 | 64236175 | G | T | 0.56 | 2.23E-05 | 1.61E-03 | 1.13E-02 |
| rs12908891 | Brain_Anterior_cingulate_cortex_BA24 | 15 | HERC1 | 64013479 | rs4776268   | 1.0000 | 64236398 | A | G | 0.51 | 6.19E-06 | 7.87E-05 | 2.24E-02 |
| rs12908891 | Brain_Anterior_cingulate_cortex_BA24 | 15 | DAPK2 | 64281733 | rs4776268   | 1.0000 | 64236398 | A | G | 0.51 | 6.19E-06 | 1.52E-02 | 6.66E-02 |
| rs12908891 | Brain_Anterior_cingulate_cortex_BA24 | 15 | HERC1 | 64013479 | rs12908891  | 1.0000 | 64236441 | A | G | 0.52 | 1.39E-06 | 7.02E-05 | 1.94E-03 |
| rs12908891 | Brain_Anterior_cingulate_cortex_BA24 | 15 | DAPK2 | 64281733 | rs12908891  | 1.0000 | 64236441 | A | G | 0.52 | 1.39E-06 | 1.40E-02 | 2.77E-02 |
| rs12908891 | Brain_Anterior_cingulate_cortex_BA24 | 15 | HERC1 | 64013479 | rs11071779  | 0.9881 | 64239044 | G | A | 0.51 | 1.57E-06 | 2.29E-05 | 1.40E-03 |
| rs12908891 | Brain_Anterior_cingulate_cortex_BA24 | 15 | DAPK2 | 64281733 | rs11071779  | 0.9881 | 64239044 | G | A | 0.51 | 1.57E-06 | 2.16E-02 | 3.77E-02 |
| rs12908891 | Brain_Anterior_cingulate_cortex_BA24 | 15 | HERC1 | 64013479 | rs11071780  | 0.9842 | 64241691 | A | G | 0.51 | 4.74E-06 | 2.52E-05 | 2.17E-02 |
| rs12908891 | Brain_Anterior_cingulate_cortex_BA24 | 15 | DAPK2 | 64281733 | rs11071780  | 0.9842 | 64241691 | A | G | 0.51 | 4.74E-06 | 3.41E-02 | 9.38E-02 |
| rs12908891 | Brain_Anterior_cingulate_cortex_BA24 | 15 | HERC1 | 64013479 | rs11854537  | 0.9842 | 64241733 | A | G | 0.51 | 4.74E-06 | 2.52E-05 | 2.17E-02 |
| rs12908891 | Brain_Anterior_cingulate_cortex_BA24 | 15 | DAPK2 | 64281733 | rs11854537  | 0.9842 | 64241733 | A | G | 0.51 | 4.74E-06 | 3.41E-02 | 9.38E-02 |
| rs12908891 | Brain_Anterior_cingulate_cortex_BA24 | 15 | HERC1 | 64013479 | rs1380844   | 0.9881 | 64242007 | G | T | 0.51 | 4.74E-06 | 2.52E-05 | 2.17E-02 |
| rs12908891 | Brain_Anterior_cingulate_cortex_BA24 | 15 | DAPK2 | 64281733 | rs1380844   | 0.9881 | 64242007 | G | T | 0.51 | 4.74E-06 | 3.41E-02 | 9.38E-02 |
| rs12908891 | Brain_Anterior_cingulate_cortex_BA24 | 15 | HERC1 | 64013479 | rs12916806  | 0.9881 | 64242770 | C | A | 0.51 | 4.64E-06 | 2.52E-05 | 2.17E-02 |
| rs12908891 | Brain_Anterior_cingulate_cortex_BA24 | 15 | DAPK2 | 64281733 | rs12916806  | 0.9881 | 64242770 | C | A | 0.51 | 4.64E-06 | 3.41E-02 | 9.37E-02 |
| rs12908891 | Brain_Anterior_cingulate_cortex_BA24 | 15 | HERC1 | 64013479 | rs11071781  | 0.9195 | 64243933 | G | A | 0.49 | 4.75E-06 | 2.22E-05 | 1.02E-02 |
| rs12908891 | Brain_Anterior_cingulate_cortex_BA24 | 15 | DAPK2 | 64281733 | rs11071781  | 0.9195 | 64243933 | G | A | 0.49 | 4.75E-06 | 9.02E-03 | 4.23E-02 |
| rs12908891 | Brain_Anterior_cingulate_cortex_BA24 | 15 | HERC1 | 64013479 | rs1304365   | 0.9881 | 64245946 | A | G | 0.51 | 4.67E-06 | 2.29E-05 | 2.15E-02 |
| rs12908891 | Brain_Anterior_cingulate_cortex_BA24 | 15 | DAPK2 | 64281733 | rs1304365   | 0.9881 | 64245946 | A | G | 0.51 | 4.67E-06 | 2.16E-02 | 7.84E-02 |
| rs12908891 | Brain_Anterior_cingulate_cortex_BA24 | 15 | HERC1 | 64013479 | rs115415409 | 0.8420 | 64249559 | T | C | 0.45 | 1.45E-05 | 1.52E-04 | 5.70E-03 |
| rs12908891 | Brain_Anterior_cingulate_cortex_BA24 | 15 | DAPK2 | 64281733 | rs115415409 | 0.8420 | 64249559 | T | C | 0.45 | 1.45E-05 | 3.05E-02 | 5.65E-02 |
| rs12908891 | Brain_Anterior_cingulate_cortex_BA24 | 15 | HERC1 | 64013479 | rs145159458 | 0.9119 | 64252880 | T | C | 0.49 | 1.21E-05 | 2.86E-05 | 1.72E-02 |
| rs12908891 | Brain_Anterior_cingulate_cortex_BA24 | 15 | DAPK2 | 64281733 | rs145159458 | 0.9119 | 64252880 | T | C | 0.49 | 1.21E-05 | 1.33E-02 | 5.98E-02 |
| rs12908891 | Brain_Anterior_cingulate_cortex_BA24 | 15 | HERC1 | 64013479 | rs4776692   | 0.9881 | 64255083 | G | A | 0.50 | 1.06E-05 | 2.52E-05 | 2.90E-02 |
| rs12908891 | Brain_Anterior_cingulate_cortex_BA24 | 15 | DAPK2 | 64281733 | rs4776692   | 0.9881 | 64255083 | G | A | 0.50 | 1.06E-05 | 3.41E-02 | 1.03E-01 |
| rs12908891 | Brain_Anterior_cingulate_cortex_BA24 | 15 | HERC1 | 64013479 | rs28822416  | 0.8420 | 64257845 | C | T | 0.45 | 1.54E-05 | 5.53E-05 | 4.39E-03 |
| rs12908891 | Brain_Anterior_cingulate_cortex_BA24 | 15 | DAPK2 | 64281733 | rs28822416  | 0.8420 | 64257845 | C | T | 0.45 | 1.54E-05 | 3.89E-02 | 6.61E-02 |
| rs12908891 | Brain_Anterior_cingulate_cortex_BA24 | 15 | HERC1 | 64013479 | rs8035776   | 0.8420 | 64258018 | G | A | 0.45 | 1.54E-05 | 5.53E-05 | 4.39E-03 |
| rs12908891 | Brain_Anterior_cingulate_cortex_BA24 | 15 | DAPK2 | 64281733 | rs8035776   | 0.8420 | 64258018 | G | A | 0.45 | 1.54E-05 | 3.89E-02 | 6.61E-02 |

|            |                                      |    |                      |          |             |        |          |   |   |      |          |          |          |
|------------|--------------------------------------|----|----------------------|----------|-------------|--------|----------|---|---|------|----------|----------|----------|
| rs12908891 | Brain_Anterior_cingulate_cortex_BA24 | 15 | <i>HERC1</i>         | 64013479 | rs6494456   | 0.8381 | 64258260 | C | T | 0.45 | 1.54E-05 | 5.53E-05 | 4.39E-03 |
| rs12908891 | Brain_Anterior_cingulate_cortex_BA24 | 15 | <i>DAPK2</i>         | 64281733 | rs6494456   | 0.8381 | 64258260 | C | T | 0.45 | 1.54E-05 | 3.89E-02 | 6.61E-02 |
| rs12908891 | Brain_Anterior_cingulate_cortex_BA24 | 15 | <i>HERC1</i>         | 64013479 | rs4776695   | 0.8350 | 64259115 | T | C | 0.46 | 9.12E-06 | 9.66E-05 | 3.98E-03 |
| rs12908891 | Brain_Anterior_cingulate_cortex_BA24 | 15 | <i>KIAA0101</i>      | 64668539 | rs4776695   | 0.8350 | 64259115 | T | C | 0.46 | 9.12E-06 | 4.15E-02 | 6.58E-02 |
| rs12908891 | Brain_Caudate_basal_ganglia          | 15 | <i>RP11-321G12.1</i> | 63705841 | rs11853632  | 0.8921 | 64217845 | C | G | 0.50 | 4.21E-05 | 2.95E-02 | 6.66E-02 |
| rs12908891 | Brain_Caudate_basal_ganglia          | 15 | <i>RP11-321G12.1</i> | 63705841 | rs12907405  | 0.8884 | 64220046 | T | C | 0.50 | 4.35E-05 | 3.58E-02 | 7.42E-02 |
| rs12908891 | Brain_Caudate_basal_ganglia          | 15 | <i>RP11-321G12.1</i> | 63705841 | rs11071775  | 0.8808 | 64220995 | A | G | 0.50 | 4.81E-05 | 3.55E-02 | 7.39E-02 |
| rs12908891 | Brain_Caudate_basal_ganglia          | 15 | <i>RP11-321G12.1</i> | 63705841 | rs11071776  | 0.8808 | 64221010 | T | A | 0.50 | 5.49E-05 | 3.55E-02 | 7.49E-02 |
| rs12908891 | Brain_Caudate_basal_ganglia          | 15 | <i>RP11-321G12.1</i> | 63705841 | rs11637858  | 0.8959 | 64224107 | C | T | 0.49 | 4.60E-05 | 3.55E-02 | 7.35E-02 |
| rs12908891 | Brain_Caudate_basal_ganglia          | 15 | <i>APH1B</i>         | 63584771 | rs11071777  | 0.8557 | 64229285 | C | G | 0.55 | 9.20E-06 | 2.56E-02 | 4.43E-02 |
| rs12908891 | Brain_Caudate_basal_ganglia          | 15 | <i>RP11-321G12.1</i> | 63705841 | rs1563886   | 0.9272 | 64230852 | G | C | 0.49 | 8.06E-06 | 4.21E-02 | 8.39E-02 |
| rs12908891 | Brain_Caudate_basal_ganglia          | 15 | <i>RP11-321G12.1</i> | 63705841 | rs4776268   | 1.0000 | 64236398 | A | G | 0.51 | 6.19E-06 | 1.43E-02 | 6.53E-02 |
| rs12908891 | Brain_Caudate_basal_ganglia          | 15 | <i>RP11-321G12.1</i> | 63705841 | rs11071779  | 0.9881 | 64239044 | G | A | 0.51 | 1.57E-06 | 1.78E-02 | 3.31E-02 |
| rs12908891 | Brain_Caudate_basal_ganglia          | 15 | <i>RP11-321G12.1</i> | 63705841 | rs11071780  | 0.9842 | 64241691 | A | G | 0.51 | 4.74E-06 | 1.95E-02 | 7.56E-02 |
| rs12908891 | Brain_Caudate_basal_ganglia          | 15 | <i>RP11-321G12.1</i> | 63705841 | rs11854537  | 0.9842 | 64241733 | A | G | 0.51 | 4.74E-06 | 1.95E-02 | 7.56E-02 |
| rs12908891 | Brain_Caudate_basal_ganglia          | 15 | <i>RP11-321G12.1</i> | 63705841 | rs1380844   | 0.9881 | 64242007 | G | T | 0.51 | 4.74E-06 | 1.95E-02 | 7.56E-02 |
| rs12908891 | Brain_Caudate_basal_ganglia          | 15 | <i>RP11-321G12.1</i> | 63705841 | rs12916806  | 0.9881 | 64242770 | C | A | 0.51 | 4.64E-06 | 1.95E-02 | 7.56E-02 |
| rs12908891 | Brain_Caudate_basal_ganglia          | 15 | <i>RP11-321G12.1</i> | 63705841 | rs11071781  | 0.9195 | 64243933 | G | A | 0.49 | 4.75E-06 | 2.62E-02 | 6.70E-02 |
| rs12908891 | Brain_Caudate_basal_ganglia          | 15 | <i>RP11-321G12.1</i> | 63705841 | rs1304365   | 0.9881 | 64245946 | A | G | 0.51 | 4.67E-06 | 9.76E-03 | 6.02E-02 |
| rs12908891 | Brain_Caudate_basal_ganglia          | 15 | <i>RP11-321G12.1</i> | 63705841 | rs115415409 | 0.8420 | 64249559 | T | C | 0.45 | 1.45E-05 | 2.17E-02 | 4.59E-02 |
| rs12908891 | Brain_Caudate_basal_ganglia          | 15 | <i>RP11-321G12.1</i> | 63705841 | rs145159458 | 0.9119 | 64252880 | T | C | 0.49 | 1.21E-05 | 3.11E-02 | 8.37E-02 |
| rs12908891 | Brain_Caudate_basal_ganglia          | 15 | <i>RP11-321G12.1</i> | 63705841 | rs4776692   | 0.9881 | 64255083 | G | A | 0.50 | 1.06E-05 | 1.95E-02 | 8.49E-02 |
| rs12908891 | Brain_Caudate_basal_ganglia          | 15 | <i>RP11-321G12.1</i> | 63705841 | rs28822416  | 0.8420 | 64257845 | C | T | 0.45 | 1.54E-05 | 2.41E-02 | 4.91E-02 |
| rs12908891 | Brain_Caudate_basal_ganglia          | 15 | <i>RP11-321G12.1</i> | 63705841 | rs8035776   | 0.8420 | 64258018 | G | A | 0.45 | 1.54E-05 | 2.41E-02 | 4.91E-02 |
| rs12908891 | Brain_Caudate_basal_ganglia          | 15 | <i>RP11-321G12.1</i> | 63705841 | rs6494456   | 0.8381 | 64258260 | C | T | 0.45 | 1.54E-05 | 2.41E-02 | 4.91E-02 |
| rs12908891 | Brain_Caudate_basal_ganglia          | 15 | <i>RP11-321G12.1</i> | 63705841 | rs4776695   | 0.8350 | 64259115 | T | C | 0.46 | 9.12E-06 | 1.28E-02 | 3.15E-02 |
| rs12908891 | Brain_Cerebellar_Hemisphere          | 15 | <i>ANKDD1A</i>       | 65227571 | rs11637858  | 0.8959 | 64224107 | C | T | 0.49 | 4.60E-05 | 3.27E-02 | 7.03E-02 |
| rs12908891 | Brain_Cerebellar_Hemisphere          | 15 | <i>ANKDD1A</i>       | 65227571 | rs12916395  | 0.9921 | 64225563 | T | C | 0.51 | 1.86E-06 | 4.03E-02 | 5.82E-02 |
| rs12908891 | Brain_Cerebellar_Hemisphere          | 15 | <i>ANKDD1A</i>       | 65227571 | rs11630587  | 0.9921 | 64225908 | C | T | 0.51 | 1.77E-06 | 2.84E-02 | 4.50E-02 |
| rs12908891 | Brain_Cerebellar_Hemisphere          | 15 | <i>ANKDD1A</i>       | 65227571 | rs4776677   | 0.9921 | 64227044 | C | T | 0.51 | 1.54E-06 | 3.07E-02 | 4.75E-02 |
| rs12908891 | Brain_Cerebellar_Hemisphere          | 15 | <i>ANKDD1A</i>       | 65227571 | rs1563886   | 0.9272 | 64230852 | G | C | 0.49 | 8.06E-06 | 2.20E-02 | 6.03E-02 |
| rs12908891 | Brain_Cerebellar_Hemisphere          | 15 | <i>ANKDD1A</i>       | 65227571 | rs10744961  | 0.9960 | 64230930 | A | G | 0.51 | 1.86E-06 | 3.04E-02 | 4.77E-02 |
| rs12908891 | Brain_Cerebellar_Hemisphere          | 15 | <i>USP3-AS1</i>      | 63864970 | rs6494454   | 0.8031 | 64233563 | A | C | 0.56 | 2.52E-05 | 3.90E-02 | 6.35E-02 |
| rs12908891 | Brain_Cerebellar_Hemisphere          | 15 | <i>ANKDD1A</i>       | 65227571 | rs6494454   | 0.8031 | 64233563 | A | C | 0.56 | 2.52E-05 | 1.66E-02 | 3.70E-02 |
| rs12908891 | Brain_Cerebellar_Hemisphere          | 15 | <i>USP3-AS1</i>      | 63864970 | rs894660    | 0.8031 | 64234334 | C | T | 0.56 | 2.52E-05 | 3.90E-02 | 6.35E-02 |
| rs12908891 | Brain_Cerebellar_Hemisphere          | 15 | <i>ANKDD1A</i>       | 65227571 | rs894660    | 0.8031 | 64234334 | C | T | 0.56 | 2.52E-05 | 1.66E-02 | 3.70E-02 |
| rs12908891 | Brain_Cerebellar_Hemisphere          | 15 | <i>USP3-AS1</i>      | 63864970 | rs4776266   | 0.8031 | 64236175 | G | T | 0.56 | 2.23E-05 | 4.33E-02 | 6.80E-02 |
| rs12908891 | Brain_Cerebellar_Hemisphere          | 15 | <i>SNX22</i>         | 64446798 | rs4776266   | 0.8031 | 64236175 | G | T | 0.56 | 2.23E-05 | 4.73E-02 | 7.23E-02 |
| rs12908891 | Brain_Cerebellar_Hemisphere          | 15 | <i>ANKDD1A</i>       | 65227571 | rs4776266   | 0.8031 | 64236175 | G | T | 0.56 | 2.23E-05 | 2.39E-02 | 4.61E-02 |
| rs12908891 | Brain_Cerebellar_Hemisphere          | 15 | <i>ANKDD1A</i>       | 65227571 | rs4776268   | 1.0000 | 64236398 | A | G | 0.51 | 6.19E-06 | 1.27E-02 | 6.27E-02 |

|            |                             |    |               |          |             |        |          |   |   |      |          |          |          |
|------------|-----------------------------|----|---------------|----------|-------------|--------|----------|---|---|------|----------|----------|----------|
| rs12908891 | Brain_Cerebellar_Hemisphere | 15 | ANKDD1A       | 65227571 | rs12908891  | 1.0000 | 64236441 | A | G | 0.52 | 1.39E-06 | 3.20E-02 | 4.90E-02 |
| rs12908891 | Brain_Cerebellar_Hemisphere | 15 | ANKDD1A       | 65227571 | rs11071779  | 0.9881 | 64239044 | G | A | 0.51 | 1.57E-06 | 3.56E-02 | 5.37E-02 |
| rs12908891 | Brain_Cerebellar_Hemisphere | 15 | ANKDD1A       | 65227571 | rs11071780  | 0.9842 | 64241691 | A | G | 0.51 | 4.74E-06 | 2.78E-02 | 8.63E-02 |
| rs12908891 | Brain_Cerebellar_Hemisphere | 15 | ANKDD1A       | 65227571 | rs11854537  | 0.9842 | 64241733 | A | G | 0.51 | 4.74E-06 | 2.78E-02 | 8.63E-02 |
| rs12908891 | Brain_Cerebellar_Hemisphere | 15 | ANKDD1A       | 65227571 | rs1380844   | 0.9881 | 64242007 | G | T | 0.51 | 4.74E-06 | 2.78E-02 | 8.63E-02 |
| rs12908891 | Brain_Cerebellar_Hemisphere | 15 | ANKDD1A       | 65227571 | rs12916806  | 0.9881 | 64242770 | C | A | 0.51 | 4.64E-06 | 2.78E-02 | 8.63E-02 |
| rs12908891 | Brain_Cerebellar_Hemisphere | 15 | ANKDD1A       | 65227571 | rs1304365   | 0.9881 | 64245946 | A | G | 0.51 | 4.67E-06 | 2.78E-02 | 8.64E-02 |
| rs12908891 | Brain_Cerebellar_Hemisphere | 15 | SNX22         | 64446798 | rs115415409 | 0.8420 | 64249559 | T | C | 0.45 | 1.45E-05 | 9.84E-03 | 2.96E-02 |
| rs12908891 | Brain_Cerebellar_Hemisphere | 15 | ANKDD1A       | 65227571 | rs115415409 | 0.8420 | 64249559 | T | C | 0.45 | 1.45E-05 | 3.78E-02 | 6.46E-02 |
| rs12908891 | Brain_Cerebellar_Hemisphere | 15 | ANKDD1A       | 65227571 | rs145159458 | 0.9119 | 64252880 | T | C | 0.49 | 1.21E-05 | 4.58E-02 | 1.00E-01 |
| rs12908891 | Brain_Cerebellar_Hemisphere | 15 | ANKDD1A       | 65227571 | rs4776692   | 0.9881 | 64255083 | G | A | 0.50 | 1.06E-05 | 2.78E-02 | 9.56E-02 |
| rs12908891 | Brain_Cerebellar_Hemisphere | 15 | SNX22         | 64446798 | rs28822416  | 0.8420 | 64257845 | C | T | 0.45 | 1.54E-05 | 1.33E-02 | 3.49E-02 |
| rs12908891 | Brain_Cerebellar_Hemisphere | 15 | SNX22         | 64446798 | rs8035776   | 0.8420 | 64258018 | G | A | 0.45 | 1.54E-05 | 1.33E-02 | 3.49E-02 |
| rs12908891 | Brain_Cerebellar_Hemisphere | 15 | SNX22         | 64446798 | rs6494456   | 0.8381 | 64258260 | C | T | 0.45 | 1.54E-05 | 1.33E-02 | 3.49E-02 |
| rs12908891 | Brain_Cerebellar_Hemisphere | 15 | PLEKHO2       | 65147147 | rs4776695   | 0.8350 | 64259115 | T | C | 0.46 | 9.12E-06 | 3.37E-02 | 5.72E-02 |
| rs12908891 | Brain_Cerebellum            | 15 | RP11-244F12.3 | 63339909 | rs1460544   | 0.8736 | 64201766 | T | C | 0.51 | 9.06E-04 | 2.73E-02 | 1.45E-01 |
| rs12908891 | Brain_Cerebellum            | 15 | CA12          | 63643968 | rs1460544   | 0.8736 | 64201766 | T | C | 0.51 | 9.06E-04 | 1.29E-02 | 1.26E-01 |
| rs12908891 | Brain_Cerebellum            | 15 | DAPK2         | 64281733 | rs1460544   | 0.8736 | 64201766 | T | C | 0.51 | 9.06E-04 | 6.63E-04 | 9.15E-02 |
| rs12908891 | Brain_Cerebellum            | 15 | RP11-244F12.3 | 63339909 | rs1037846   | 0.8696 | 64204870 | G | A | 0.51 | 6.33E-04 | 2.68E-02 | 5.74E-02 |
| rs12908891 | Brain_Cerebellum            | 15 | CA12          | 63643968 | rs1037846   | 0.8696 | 64204870 | G | A | 0.51 | 6.33E-04 | 2.86E-02 | 5.95E-02 |
| rs12908891 | Brain_Cerebellum            | 15 | DAPK2         | 64281733 | rs1037846   | 0.8696 | 64204870 | G | A | 0.51 | 6.33E-04 | 1.14E-03 | 1.45E-02 |
| rs12908891 | Brain_Cerebellum            | 15 | RP11-244F12.3 | 63339909 | rs11071773  | 0.8883 | 64206765 | A | G | 0.51 | 8.95E-04 | 2.54E-02 | 1.15E-01 |
| rs12908891 | Brain_Cerebellum            | 15 | CA12          | 63643968 | rs11071773  | 0.8883 | 64206765 | A | G | 0.51 | 8.95E-04 | 4.66E-02 | 1.38E-01 |
| rs12908891 | Brain_Cerebellum            | 15 | DAPK2         | 64281733 | rs11071773  | 0.8883 | 64206765 | A | G | 0.51 | 8.95E-04 | 9.40E-04 | 6.54E-02 |
| rs12908891 | Brain_Cerebellum            | 15 | RP11-244F12.3 | 63339909 | rs12909081  | 0.8809 | 64208260 | A | C | 0.51 | 1.00E-03 | 2.42E-02 | 1.18E-01 |
| rs12908891 | Brain_Cerebellum            | 15 | CA12          | 63643968 | rs12909081  | 0.8809 | 64208260 | A | C | 0.51 | 1.00E-03 | 2.75E-02 | 1.22E-01 |
| rs12908891 | Brain_Cerebellum            | 15 | DAPK2         | 64281733 | rs12909081  | 0.8809 | 64208260 | A | C | 0.51 | 1.00E-03 | 5.59E-04 | 6.58E-02 |
| rs12908891 | Brain_Cerebellum            | 15 | RP11-244F12.3 | 63339909 | rs749468    | 0.9493 | 64210279 | T | C | 0.53 | 2.79E-04 | 3.01E-02 | 6.07E-02 |
| rs12908891 | Brain_Cerebellum            | 15 | CA12          | 63643968 | rs749468    | 0.9493 | 64210279 | T | C | 0.53 | 2.79E-04 | 3.40E-02 | 6.52E-02 |
| rs12908891 | Brain_Cerebellum            | 15 | FBXL22        | 63892089 | rs749468    | 0.9493 | 64210279 | T | C | 0.53 | 2.79E-04 | 4.10E-02 | 7.30E-02 |
| rs12908891 | Brain_Cerebellum            | 15 | DAPK2         | 64281733 | rs749468    | 0.9493 | 64210279 | T | C | 0.53 | 2.79E-04 | 3.59E-04 | 9.85E-03 |
| rs12908891 | Brain_Cerebellum            | 15 | RP11-244F12.3 | 63339909 | rs2414844   | 0.8846 | 64210675 | A | G | 0.51 | 9.01E-04 | 2.42E-02 | 1.15E-01 |
| rs12908891 | Brain_Cerebellum            | 15 | CA12          | 63643968 | rs2414844   | 0.8846 | 64210675 | A | G | 0.51 | 9.01E-04 | 2.75E-02 | 1.19E-01 |
| rs12908891 | Brain_Cerebellum            | 15 | DAPK2         | 64281733 | rs2414844   | 0.8846 | 64210675 | A | G | 0.51 | 9.01E-04 | 5.59E-04 | 6.28E-02 |
| rs12908891 | Brain_Cerebellum            | 15 | RP11-244F12.3 | 63339909 | rs12592060  | 0.8846 | 64210780 | T | C | 0.51 | 9.01E-04 | 2.42E-02 | 1.15E-01 |
| rs12908891 | Brain_Cerebellum            | 15 | CA12          | 63643968 | rs12592060  | 0.8846 | 64210780 | T | C | 0.51 | 9.01E-04 | 2.75E-02 | 1.19E-01 |
| rs12908891 | Brain_Cerebellum            | 15 | DAPK2         | 64281733 | rs12592060  | 0.8846 | 64210780 | T | C | 0.51 | 9.01E-04 | 5.59E-04 | 6.28E-02 |
| rs12908891 | Brain_Cerebellum            | 15 | RP11-244F12.3 | 63339909 | rs1471282   | 0.8846 | 64212275 | G | T | 0.51 | 1.07E-03 | 2.42E-02 | 1.21E-01 |
| rs12908891 | Brain_Cerebellum            | 15 | CA12          | 63643968 | rs1471282   | 0.8846 | 64212275 | G | T | 0.51 | 1.07E-03 | 2.75E-02 | 1.25E-01 |
| rs12908891 | Brain_Cerebellum            | 15 | DAPK2         | 64281733 | rs1471282   | 0.8846 | 64212275 | G | T | 0.51 | 1.07E-03 | 5.59E-04 | 6.92E-02 |



|            |                  |    |               |          |            |        |          |   |   |      |          |          |          |
|------------|------------------|----|---------------|----------|------------|--------|----------|---|---|------|----------|----------|----------|
| rs12908891 | Brain_Cerebellum | 15 | RP11-244F12.3 | 63339909 | rs11635779 | 0.8808 | 64213826 | T | C | 0.50 | 6.34E-05 | 3.41E-02 | 7.51E-02 |
| rs12908891 | Brain_Cerebellum | 15 | CA12          | 63643968 | rs11635779 | 0.8808 | 64213826 | T | C | 0.50 | 6.34E-05 | 4.03E-02 | 8.20E-02 |
| rs12908891 | Brain_Cerebellum | 15 | DAPK2         | 64281733 | rs11635779 | 0.8808 | 64213826 | T | C | 0.50 | 6.34E-05 | 5.71E-04 | 1.75E-02 |
| rs12908891 | Brain_Cerebellum | 15 | RP11-244F12.3 | 63339909 | rs12904374 | 0.8808 | 64214670 | T | A | 0.51 | 8.63E-04 | 3.50E-02 | 6.96E-02 |
| rs12908891 | Brain_Cerebellum | 15 | DAPK2         | 64281733 | rs12904374 | 0.8808 | 64214670 | T | A | 0.51 | 8.63E-04 | 9.25E-04 | 1.53E-02 |
| rs12908891 | Brain_Cerebellum | 15 | RP11-244F12.3 | 63339909 | rs920762   | 0.9379 | 64214954 | C | G | 0.47 | 1.24E-05 | 3.72E-02 | 5.73E-02 |
| rs12908891 | Brain_Cerebellum | 15 | LACTB         | 63424129 | rs920762   | 0.9379 | 64214954 | C | G | 0.47 | 1.24E-05 | 4.98E-02 | 7.08E-02 |
| rs12908891 | Brain_Cerebellum | 15 | DAPK2         | 64281733 | rs920762   | 0.9379 | 64214954 | C | G | 0.47 | 1.24E-05 | 1.31E-03 | 8.25E-03 |
| rs12908891 | Brain_Cerebellum | 15 | RP11-244F12.3 | 63339909 | rs11853632 | 0.8921 | 64217845 | C | G | 0.50 | 4.21E-05 | 1.92E-02 | 5.36E-02 |
| rs12908891 | Brain_Cerebellum | 15 | CA12          | 63643968 | rs11853632 | 0.8921 | 64217845 | C | G | 0.50 | 4.21E-05 | 1.99E-02 | 5.46E-02 |
| rs12908891 | Brain_Cerebellum | 15 | DAPK2         | 64281733 | rs11853632 | 0.8921 | 64217845 | C | G | 0.50 | 4.21E-05 | 6.27E-03 | 3.30E-02 |
| rs12908891 | Brain_Cerebellum | 15 | RP11-244F12.3 | 63339909 | rs12907405 | 0.8884 | 64220046 | T | C | 0.50 | 4.35E-05 | 2.32E-02 | 5.92E-02 |
| rs12908891 | Brain_Cerebellum | 15 | CA12          | 63643968 | rs12907405 | 0.8884 | 64220046 | T | C | 0.50 | 4.35E-05 | 2.58E-02 | 6.24E-02 |
| rs12908891 | Brain_Cerebellum | 15 | DAPK2         | 64281733 | rs12907405 | 0.8884 | 64220046 | T | C | 0.50 | 4.35E-05 | 5.70E-04 | 1.56E-02 |
| rs12908891 | Brain_Cerebellum | 15 | RP11-244F12.3 | 63339909 | rs11071775 | 0.8808 | 64220995 | A | G | 0.50 | 4.81E-05 | 3.69E-02 | 7.55E-02 |
| rs12908891 | Brain_Cerebellum | 15 | CA12          | 63643968 | rs11071775 | 0.8808 | 64220995 | A | G | 0.50 | 4.81E-05 | 1.94E-02 | 5.42E-02 |
| rs12908891 | Brain_Cerebellum | 15 | DAPK2         | 64281733 | rs11071775 | 0.8808 | 64220995 | A | G | 0.50 | 4.81E-05 | 1.10E-03 | 1.87E-02 |
| rs12908891 | Brain_Cerebellum | 15 | RP11-244F12.3 | 63339909 | rs11071776 | 0.8808 | 64221010 | T | A | 0.50 | 5.49E-05 | 3.69E-02 | 7.65E-02 |
| rs12908891 | Brain_Cerebellum | 15 | CA12          | 63643968 | rs11071776 | 0.8808 | 64221010 | T | A | 0.50 | 5.49E-05 | 1.94E-02 | 5.52E-02 |
| rs12908891 | Brain_Cerebellum | 15 | DAPK2         | 64281733 | rs11071776 | 0.8808 | 64221010 | T | A | 0.50 | 5.49E-05 | 1.10E-03 | 1.94E-02 |
| rs12908891 | Brain_Cerebellum | 15 | CA12          | 63643968 | rs11637858 | 0.8959 | 64224107 | C | T | 0.49 | 4.60E-05 | 2.10E-02 | 5.60E-02 |
| rs12908891 | Brain_Cerebellum | 15 | DAPK2         | 64281733 | rs11637858 | 0.8959 | 64224107 | C | T | 0.49 | 4.60E-05 | 1.29E-03 | 1.93E-02 |
| rs12908891 | Brain_Cerebellum | 15 | LACTB         | 63424129 | rs12916395 | 0.9921 | 64225563 | T | C | 0.51 | 1.86E-06 | 3.84E-02 | 5.61E-02 |
| rs12908891 | Brain_Cerebellum | 15 | DAPK2         | 64281733 | rs12916395 | 0.9921 | 64225563 | T | C | 0.51 | 1.86E-06 | 1.57E-03 | 7.72E-03 |
| rs12908891 | Brain_Cerebellum | 15 | LACTB         | 63424129 | rs11630587 | 0.9921 | 64225908 | C | T | 0.51 | 1.77E-06 | 2.78E-02 | 4.43E-02 |
| rs12908891 | Brain_Cerebellum | 15 | CA12          | 63643968 | rs11630587 | 0.9921 | 64225908 | C | T | 0.51 | 1.77E-06 | 3.66E-02 | 5.41E-02 |
| rs12908891 | Brain_Cerebellum | 15 | DAPK2         | 64281733 | rs11630587 | 0.9921 | 64225908 | C | T | 0.51 | 1.77E-06 | 2.70E-03 | 1.03E-02 |
| rs12908891 | Brain_Cerebellum | 15 | LACTB         | 63424129 | rs4776677  | 0.9921 | 64227044 | C | T | 0.51 | 1.54E-06 | 3.45E-02 | 5.16E-02 |
| rs12908891 | Brain_Cerebellum | 15 | DAPK2         | 64281733 | rs4776677  | 0.9921 | 64227044 | C | T | 0.51 | 1.54E-06 | 2.54E-03 | 9.84E-03 |
| rs12908891 | Brain_Cerebellum | 15 | LACTB         | 63424129 | rs11071777 | 0.8557 | 64229285 | C | G | 0.55 | 9.20E-06 | 5.09E-03 | 1.65E-02 |
| rs12908891 | Brain_Cerebellum | 15 | USP3-AS1      | 63864970 | rs11071777 | 0.8557 | 64229285 | C | G | 0.55 | 9.20E-06 | 4.89E-02 | 7.00E-02 |
| rs12908891 | Brain_Cerebellum | 15 | DAPK2         | 64281733 | rs11071777 | 0.8557 | 64229285 | C | G | 0.55 | 9.20E-06 | 8.60E-04 | 6.82E-03 |
| rs12908891 | Brain_Cerebellum | 15 | RP11-244F12.3 | 63339909 | rs1563886  | 0.9272 | 64230852 | G | C | 0.49 | 8.06E-06 | 4.91E-02 | 9.15E-02 |
| rs12908891 | Brain_Cerebellum | 15 | CA12          | 63643968 | rs1563886  | 0.9272 | 64230852 | G | C | 0.49 | 8.06E-06 | 1.90E-02 | 5.63E-02 |
| rs12908891 | Brain_Cerebellum | 15 | DAPK2         | 64281733 | rs1563886  | 0.9272 | 64230852 | G | C | 0.49 | 8.06E-06 | 1.01E-03 | 2.02E-02 |
| rs12908891 | Brain_Cerebellum | 15 | LACTB         | 63424129 | rs10744961 | 0.9960 | 64230930 | A | G | 0.51 | 1.86E-06 | 3.98E-02 | 5.80E-02 |
| rs12908891 | Brain_Cerebellum | 15 | CA12          | 63643968 | rs10744961 | 0.9960 | 64230930 | A | G | 0.51 | 1.86E-06 | 3.53E-02 | 5.31E-02 |
| rs12908891 | Brain_Cerebellum | 15 | DAPK2         | 64281733 | rs10744961 | 0.9960 | 64230930 | A | G | 0.51 | 1.86E-06 | 2.08E-03 | 9.15E-03 |
| rs12908891 | Brain_Cerebellum | 15 | LACTB         | 63424129 | rs6494454  | 0.8031 | 64233563 | A | C | 0.56 | 2.52E-05 | 3.21E-02 | 5.59E-02 |
| rs12908891 | Brain_Cerebellum | 15 | DAPK2         | 64281733 | rs6494454  | 0.8031 | 64233563 | A | C | 0.56 | 2.52E-05 | 1.65E-03 | 1.15E-02 |

|            |                  |    |               |          |             |        |          |   |   |      |          |          |          |
|------------|------------------|----|---------------|----------|-------------|--------|----------|---|---|------|----------|----------|----------|
| rs12908891 | Brain_Cerebellum | 15 | LACTB         | 63424129 | rs894660    | 0.8031 | 64234334 | C | T | 0.56 | 2.52E-05 | 3.21E-02 | 5.59E-02 |
| rs12908891 | Brain_Cerebellum | 15 | DAPK2         | 64281733 | rs894660    | 0.8031 | 64234334 | C | T | 0.56 | 2.52E-05 | 1.65E-03 | 1.15E-02 |
| rs12908891 | Brain_Cerebellum | 15 | LACTB         | 63424129 | rs4776266   | 0.8031 | 64236175 | G | T | 0.56 | 2.23E-05 | 2.82E-02 | 5.12E-02 |
| rs12908891 | Brain_Cerebellum | 15 | DAPK2         | 64281733 | rs4776266   | 0.8031 | 64236175 | G | T | 0.56 | 2.23E-05 | 1.50E-03 | 1.10E-02 |
| rs12908891 | Brain_Cerebellum | 15 | CA12          | 63643968 | rs4776268   | 1.0000 | 64236398 | A | G | 0.51 | 6.19E-06 | 2.83E-02 | 8.43E-02 |
| rs12908891 | Brain_Cerebellum | 15 | DAPK2         | 64281733 | rs4776268   | 1.0000 | 64236398 | A | G | 0.51 | 6.19E-06 | 8.11E-04 | 3.18E-02 |
| rs12908891 | Brain_Cerebellum | 15 | RP11-244F12.3 | 63339909 | rs12908891  | 1.0000 | 64236441 | A | G | 0.52 | 1.39E-06 | 4.94E-02 | 6.77E-02 |
| rs12908891 | Brain_Cerebellum | 15 | LACTB         | 63424129 | rs12908891  | 1.0000 | 64236441 | A | G | 0.52 | 1.39E-06 | 2.10E-02 | 3.64E-02 |
| rs12908891 | Brain_Cerebellum | 15 | CA12          | 63643968 | rs12908891  | 1.0000 | 64236441 | A | G | 0.52 | 1.39E-06 | 2.44E-02 | 4.04E-02 |
| rs12908891 | Brain_Cerebellum | 15 | USP3-AS1      | 63864970 | rs12908891  | 1.0000 | 64236441 | A | G | 0.52 | 1.39E-06 | 4.85E-02 | 6.69E-02 |
| rs12908891 | Brain_Cerebellum | 15 | DAPK2         | 64281733 | rs12908891  | 1.0000 | 64236441 | A | G | 0.52 | 1.39E-06 | 1.95E-03 | 8.63E-03 |
| rs12908891 | Brain_Cerebellum | 15 | RP11-244F12.3 | 63339909 | rs11071779  | 0.9881 | 64239044 | G | A | 0.51 | 1.57E-06 | 4.92E-02 | 6.83E-02 |
| rs12908891 | Brain_Cerebellum | 15 | CA12          | 63643968 | rs11071779  | 0.9881 | 64239044 | G | A | 0.51 | 1.57E-06 | 3.33E-02 | 5.12E-02 |
| rs12908891 | Brain_Cerebellum | 15 | DAPK2         | 64281733 | rs11071779  | 0.9881 | 64239044 | G | A | 0.51 | 1.57E-06 | 3.09E-03 | 1.15E-02 |
| rs12908891 | Brain_Cerebellum | 15 | RP11-244F12.3 | 63339909 | rs11071780  | 0.9842 | 64241691 | A | G | 0.51 | 4.74E-06 | 4.06E-02 | 1.01E-01 |
| rs12908891 | Brain_Cerebellum | 15 | LACTB         | 63424129 | rs11071780  | 0.9842 | 64241691 | A | G | 0.51 | 4.74E-06 | 4.74E-02 | 1.08E-01 |
| rs12908891 | Brain_Cerebellum | 15 | CA12          | 63643968 | rs11071780  | 0.9842 | 64241691 | A | G | 0.51 | 4.74E-06 | 2.04E-02 | 7.67E-02 |
| rs12908891 | Brain_Cerebellum | 15 | DAPK2         | 64281733 | rs11071780  | 0.9842 | 64241691 | A | G | 0.51 | 4.74E-06 | 1.06E-03 | 3.57E-02 |
| rs12908891 | Brain_Cerebellum | 15 | RP11-244F12.3 | 63339909 | rs11854537  | 0.9842 | 64241733 | A | G | 0.51 | 4.74E-06 | 4.06E-02 | 1.01E-01 |
| rs12908891 | Brain_Cerebellum | 15 | LACTB         | 63424129 | rs11854537  | 0.9842 | 64241733 | A | G | 0.51 | 4.74E-06 | 4.74E-02 | 1.08E-01 |
| rs12908891 | Brain_Cerebellum | 15 | CA12          | 63643968 | rs11854537  | 0.9842 | 64241733 | A | G | 0.51 | 4.74E-06 | 2.04E-02 | 7.67E-02 |
| rs12908891 | Brain_Cerebellum | 15 | DAPK2         | 64281733 | rs11854537  | 0.9842 | 64241733 | A | G | 0.51 | 4.74E-06 | 1.06E-03 | 3.57E-02 |
| rs12908891 | Brain_Cerebellum | 15 | RP11-244F12.3 | 63339909 | rs1380844   | 0.9881 | 64242007 | G | T | 0.51 | 4.74E-06 | 4.06E-02 | 1.01E-01 |
| rs12908891 | Brain_Cerebellum | 15 | LACTB         | 63424129 | rs1380844   | 0.9881 | 64242007 | G | T | 0.51 | 4.74E-06 | 4.74E-02 | 1.08E-01 |
| rs12908891 | Brain_Cerebellum | 15 | CA12          | 63643968 | rs1380844   | 0.9881 | 64242007 | G | T | 0.51 | 4.74E-06 | 2.04E-02 | 7.67E-02 |
| rs12908891 | Brain_Cerebellum | 15 | DAPK2         | 64281733 | rs1380844   | 0.9881 | 64242007 | G | T | 0.51 | 4.74E-06 | 1.06E-03 | 3.57E-02 |
| rs12908891 | Brain_Cerebellum | 15 | RP11-244F12.3 | 63339909 | rs12916806  | 0.9881 | 64242770 | C | A | 0.51 | 4.64E-06 | 4.06E-02 | 1.01E-01 |
| rs12908891 | Brain_Cerebellum | 15 | LACTB         | 63424129 | rs12916806  | 0.9881 | 64242770 | C | A | 0.51 | 4.64E-06 | 4.74E-02 | 1.08E-01 |
| rs12908891 | Brain_Cerebellum | 15 | CA12          | 63643968 | rs12916806  | 0.9881 | 64242770 | C | A | 0.51 | 4.64E-06 | 2.04E-02 | 7.67E-02 |
| rs12908891 | Brain_Cerebellum | 15 | DAPK2         | 64281733 | rs12916806  | 0.9881 | 64242770 | C | A | 0.51 | 4.64E-06 | 1.06E-03 | 3.57E-02 |
| rs12908891 | Brain_Cerebellum | 15 | RP11-244F12.3 | 63339909 | rs11071781  | 0.9195 | 64243933 | G | A | 0.49 | 4.75E-06 | 4.57E-02 | 8.93E-02 |
| rs12908891 | Brain_Cerebellum | 15 | CA12          | 63643968 | rs11071781  | 0.9195 | 64243933 | G | A | 0.49 | 4.75E-06 | 2.46E-02 | 6.50E-02 |
| rs12908891 | Brain_Cerebellum | 15 | DAPK2         | 64281733 | rs11071781  | 0.9195 | 64243933 | G | A | 0.49 | 4.75E-06 | 1.62E-03 | 2.41E-02 |
| rs12908891 | Brain_Cerebellum | 15 | RP11-244F12.3 | 63339909 | rs1304365   | 0.9881 | 64245946 | A | G | 0.51 | 4.67E-06 | 4.38E-02 | 1.05E-01 |
| rs12908891 | Brain_Cerebellum | 15 | LACTB         | 63424129 | rs1304365   | 0.9881 | 64245946 | A | G | 0.51 | 4.67E-06 | 4.15E-02 | 1.02E-01 |
| rs12908891 | Brain_Cerebellum | 15 | CA12          | 63643968 | rs1304365   | 0.9881 | 64245946 | A | G | 0.51 | 4.67E-06 | 3.27E-02 | 9.22E-02 |
| rs12908891 | Brain_Cerebellum | 15 | DAPK2         | 64281733 | rs1304365   | 0.9881 | 64245946 | A | G | 0.51 | 4.67E-06 | 1.03E-03 | 3.55E-02 |
| rs12908891 | Brain_Cerebellum | 15 | RP11-244F12.3 | 63339909 | rs115415409 | 0.8420 | 64249559 | T | C | 0.45 | 1.45E-05 | 5.18E-03 | 2.15E-02 |
| rs12908891 | Brain_Cerebellum | 15 | LACTB         | 63424129 | rs115415409 | 0.8420 | 64249559 | T | C | 0.45 | 1.45E-05 | 4.43E-02 | 7.18E-02 |
| rs12908891 | Brain_Cerebellum | 15 | USP3-AS1      | 63864970 | rs115415409 | 0.8420 | 64249559 | T | C | 0.45 | 1.45E-05 | 4.04E-02 | 6.75E-02 |

|            |                          |    |                      |          |             |        |          |   |   |      |          |          |          |
|------------|--------------------------|----|----------------------|----------|-------------|--------|----------|---|---|------|----------|----------|----------|
| rs12908891 | Brain_Cerebellum         | 15 | <i>DAPK2</i>         | 64281733 | rs115415409 | 0.8420 | 64249559 | T | C | 0.45 | 1.45E-05 | 5.74E-03 | 2.26E-02 |
| rs12908891 | Brain_Cerebellum         | 15 | <i>RP11-244F12.3</i> | 63339909 | rs145159458 | 0.9119 | 64252880 | T | C | 0.49 | 1.21E-05 | 3.52E-02 | 8.85E-02 |
| rs12908891 | Brain_Cerebellum         | 15 | <i>CA12</i>          | 63643968 | rs145159458 | 0.9119 | 64252880 | T | C | 0.49 | 1.21E-05 | 2.22E-02 | 7.27E-02 |
| rs12908891 | Brain_Cerebellum         | 15 | <i>DAPK2</i>         | 64281733 | rs145159458 | 0.9119 | 64252880 | T | C | 0.49 | 1.21E-05 | 1.28E-03 | 3.13E-02 |
| rs12908891 | Brain_Cerebellum         | 15 | <i>RP11-244F12.3</i> | 63339909 | rs4776692   | 0.9881 | 64255083 | G | A | 0.50 | 1.06E-05 | 4.06E-02 | 1.10E-01 |
| rs12908891 | Brain_Cerebellum         | 15 | <i>LACTB</i>         | 63424129 | rs4776692   | 0.9881 | 64255083 | G | A | 0.50 | 1.06E-05 | 4.74E-02 | 1.17E-01 |
| rs12908891 | Brain_Cerebellum         | 15 | <i>CA12</i>          | 63643968 | rs4776692   | 0.9881 | 64255083 | G | A | 0.50 | 1.06E-05 | 2.04E-02 | 8.60E-02 |
| rs12908891 | Brain_Cerebellum         | 15 | <i>DAPK2</i>         | 64281733 | rs4776692   | 0.9881 | 64255083 | G | A | 0.50 | 1.06E-05 | 1.06E-03 | 4.41E-02 |
| rs12908891 | Brain_Cerebellum         | 15 | <i>RP11-244F12.3</i> | 63339909 | rs28822416  | 0.8420 | 64257845 | C | T | 0.45 | 1.54E-05 | 6.08E-03 | 2.34E-02 |
| rs12908891 | Brain_Cerebellum         | 15 | <i>USP3-AS1</i>      | 63864970 | rs28822416  | 0.8420 | 64257845 | C | T | 0.45 | 1.54E-05 | 3.33E-02 | 5.99E-02 |
| rs12908891 | Brain_Cerebellum         | 15 | <i>DAPK2</i>         | 64281733 | rs28822416  | 0.8420 | 64257845 | C | T | 0.45 | 1.54E-05 | 1.84E-03 | 1.38E-02 |
| rs12908891 | Brain_Cerebellum         | 15 | <i>RP11-244F12.3</i> | 63339909 | rs8035776   | 0.8420 | 64258018 | G | A | 0.45 | 1.54E-05 | 6.08E-03 | 2.34E-02 |
| rs12908891 | Brain_Cerebellum         | 15 | <i>USP3-AS1</i>      | 63864970 | rs8035776   | 0.8420 | 64258018 | G | A | 0.45 | 1.54E-05 | 3.33E-02 | 5.99E-02 |
| rs12908891 | Brain_Cerebellum         | 15 | <i>DAPK2</i>         | 64281733 | rs8035776   | 0.8420 | 64258018 | G | A | 0.45 | 1.54E-05 | 1.84E-03 | 1.38E-02 |
| rs12908891 | Brain_Cerebellum         | 15 | <i>RP11-244F12.3</i> | 63339909 | rs6494456   | 0.8381 | 64258260 | C | T | 0.45 | 1.54E-05 | 6.08E-03 | 2.34E-02 |
| rs12908891 | Brain_Cerebellum         | 15 | <i>USP3-AS1</i>      | 63864970 | rs6494456   | 0.8381 | 64258260 | C | T | 0.45 | 1.54E-05 | 3.33E-02 | 5.99E-02 |
| rs12908891 | Brain_Cerebellum         | 15 | <i>DAPK2</i>         | 64281733 | rs6494456   | 0.8381 | 64258260 | C | T | 0.45 | 1.54E-05 | 1.84E-03 | 1.38E-02 |
| rs12908891 | Brain_Cerebellum         | 15 | <i>DAPK2</i>         | 64281733 | rs4776695   | 0.8350 | 64259115 | T | C | 0.46 | 9.12E-06 | 2.27E-03 | 1.30E-02 |
| rs12908891 | Brain_Cortex             | 15 | <i>PLEKHO2</i>       | 65147147 | rs1037846   | 0.8696 | 64204870 | G | A | 0.51 | 6.33E-04 | 3.60E-02 | 6.81E-02 |
| rs12908891 | Brain_Cortex             | 15 | <i>PLEKHO2</i>       | 65147147 | rs749468    | 0.9493 | 64210279 | T | C | 0.53 | 2.79E-04 | 4.85E-02 | 8.10E-02 |
| rs12908891 | Brain_Cortex             | 15 | <i>PLEKHO2</i>       | 65147147 | rs920762    | 0.9379 | 64214954 | C | G | 0.47 | 1.24E-05 | 3.99E-02 | 6.02E-02 |
| rs12908891 | Brain_Cortex             | 15 | <i>LACTB</i>         | 63424129 | rs11071775  | 0.8808 | 64220995 | A | G | 0.50 | 4.81E-05 | 4.96E-02 | 8.92E-02 |
| rs12908891 | Brain_Cortex             | 15 | <i>LACTB</i>         | 63424129 | rs11071776  | 0.8808 | 64221010 | T | A | 0.50 | 5.49E-05 | 4.96E-02 | 9.02E-02 |
| rs12908891 | Brain_Cortex             | 15 | <i>RBPMS2</i>        | 65049938 | rs11071777  | 0.8557 | 64229285 | C | G | 0.55 | 9.20E-06 | 3.04E-02 | 4.98E-02 |
| rs12908891 | Brain_Cortex             | 15 | <i>ANKDD1A</i>       | 65227571 | rs6494454   | 0.8031 | 64233563 | A | C | 0.56 | 2.52E-05 | 4.45E-02 | 6.94E-02 |
| rs12908891 | Brain_Cortex             | 15 | <i>ANKDD1A</i>       | 65227571 | rs894660    | 0.8031 | 64234334 | C | T | 0.56 | 2.52E-05 | 4.45E-02 | 6.94E-02 |
| rs12908891 | Brain_Cortex             | 15 | <i>LACTB</i>         | 63424129 | rs28822416  | 0.8420 | 64257845 | C | T | 0.45 | 1.54E-05 | 2.89E-02 | 5.49E-02 |
| rs12908891 | Brain_Cortex             | 15 | <i>LACTB</i>         | 63424129 | rs8035776   | 0.8420 | 64258018 | G | A | 0.45 | 1.54E-05 | 3.60E-02 | 6.29E-02 |
| rs12908891 | Brain_Cortex             | 15 | <i>LACTB</i>         | 63424129 | rs6494456   | 0.8381 | 64258260 | C | T | 0.45 | 1.54E-05 | 2.89E-02 | 5.49E-02 |
| rs12908891 | Brain_Cortex             | 15 | <i>PLEKHO2</i>       | 65147147 | rs4776695   | 0.8350 | 64259115 | T | C | 0.46 | 9.12E-06 | 4.97E-02 | 7.45E-02 |
| rs12908891 | Brain_Frontal_Cortex_BA9 | 15 | <i>RP11-244F12.3</i> | 63339909 | rs1460544   | 0.8736 | 64201766 | T | C | 0.51 | 9.06E-04 | 4.00E-02 | 1.58E-01 |
| rs12908891 | Brain_Frontal_Cortex_BA9 | 15 | <i>AC100830.3</i>    | 65002624 | rs1037846   | 0.8696 | 64204870 | G | A | 0.51 | 6.33E-04 | 2.81E-02 | 5.89E-02 |
| rs12908891 | Brain_Frontal_Cortex_BA9 | 15 | <i>PLEKHO2</i>       | 65147147 | rs1037846   | 0.8696 | 64204870 | G | A | 0.51 | 6.33E-04 | 3.01E-02 | 6.13E-02 |
| rs12908891 | Brain_Frontal_Cortex_BA9 | 15 | <i>RP11-244F12.3</i> | 63339909 | rs11071773  | 0.8883 | 64206765 | A | G | 0.51 | 8.95E-04 | 4.33E-02 | 1.35E-01 |
| rs12908891 | Brain_Frontal_Cortex_BA9 | 15 | <i>AC100830.3</i>    | 65002624 | rs11071773  | 0.8883 | 64206765 | A | G | 0.51 | 8.95E-04 | 4.31E-02 | 1.35E-01 |
| rs12908891 | Brain_Frontal_Cortex_BA9 | 15 | <i>RP11-244F12.3</i> | 63339909 | rs12909081  | 0.8809 | 64208260 | A | C | 0.51 | 1.00E-03 | 3.91E-02 | 1.34E-01 |
| rs12908891 | Brain_Frontal_Cortex_BA9 | 15 | <i>AC100830.3</i>    | 65002624 | rs749468    | 0.9493 | 64210279 | T | C | 0.53 | 2.79E-04 | 1.94E-02 | 4.75E-02 |
| rs12908891 | Brain_Frontal_Cortex_BA9 | 15 | <i>RP11-244F12.3</i> | 63339909 | rs2414844   | 0.8846 | 64210675 | A | G | 0.51 | 9.01E-04 | 3.91E-02 | 1.32E-01 |
| rs12908891 | Brain_Frontal_Cortex_BA9 | 15 | <i>RP11-244F12.3</i> | 63339909 | rs12592060  | 0.8846 | 64210780 | T | C | 0.51 | 9.01E-04 | 3.91E-02 | 1.32E-01 |
| rs12908891 | Brain_Frontal_Cortex_BA9 | 15 | <i>RP11-244F12.3</i> | 63339909 | rs1471282   | 0.8846 | 64212275 | G | T | 0.51 | 1.07E-03 | 3.91E-02 | 1.38E-01 |

|            |                          |    |               |          |            |        |          |   |   |      |          |          |          |
|------------|--------------------------|----|---------------|----------|------------|--------|----------|---|---|------|----------|----------|----------|
| rs12908891 | Brain_Frontal_Cortex_BA9 | 15 | RP11-244F12.3 | 63339909 | rs11635779 | 0.8808 | 64213826 | T | C | 0.50 | 6.34E-05 | 3.66E-02 | 7.79E-02 |
| rs12908891 | Brain_Frontal_Cortex_BA9 | 15 | AC100830.3    | 65002624 | rs11635779 | 0.8808 | 64213826 | T | C | 0.50 | 6.34E-05 | 4.47E-02 | 8.68E-02 |
| rs12908891 | Brain_Frontal_Cortex_BA9 | 15 | RP11-244F12.3 | 63339909 | rs12904374 | 0.8808 | 64214670 | T | A | 0.51 | 8.63E-04 | 4.02E-02 | 7.54E-02 |
| rs12908891 | Brain_Frontal_Cortex_BA9 | 15 | AC100830.3    | 65002624 | rs12904374 | 0.8808 | 64214670 | T | A | 0.51 | 8.63E-04 | 3.81E-02 | 7.31E-02 |
| rs12908891 | Brain_Frontal_Cortex_BA9 | 15 | AC100830.3    | 65002624 | rs920762   | 0.9379 | 64214954 | C | G | 0.47 | 1.24E-05 | 1.17E-02 | 2.67E-02 |
| rs12908891 | Brain_Frontal_Cortex_BA9 | 15 | PLEKHO2       | 65147147 | rs920762   | 0.9379 | 64214954 | C | G | 0.47 | 1.24E-05 | 4.71E-02 | 6.80E-02 |
| rs12908891 | Brain_Frontal_Cortex_BA9 | 15 | RP11-244F12.3 | 63339909 | rs11853632 | 0.8921 | 64217845 | C | G | 0.50 | 4.21E-05 | 3.91E-02 | 7.76E-02 |
| rs12908891 | Brain_Frontal_Cortex_BA9 | 15 | RP11-244F12.3 | 63339909 | rs12907405 | 0.8884 | 64220046 | T | C | 0.50 | 4.35E-05 | 3.59E-02 | 7.43E-02 |
| rs12908891 | Brain_Frontal_Cortex_BA9 | 15 | AC100830.3    | 65002624 | rs12907405 | 0.8884 | 64220046 | T | C | 0.50 | 4.35E-05 | 4.74E-02 | 8.68E-02 |
| rs12908891 | Brain_Frontal_Cortex_BA9 | 15 | RP11-244F12.3 | 63339909 | rs11071775 | 0.8808 | 64220995 | A | G | 0.50 | 4.81E-05 | 3.59E-02 | 7.44E-02 |
| rs12908891 | Brain_Frontal_Cortex_BA9 | 15 | AC100830.3    | 65002624 | rs11071775 | 0.8808 | 64220995 | A | G | 0.50 | 4.81E-05 | 4.74E-02 | 8.69E-02 |
| rs12908891 | Brain_Frontal_Cortex_BA9 | 15 | RP11-244F12.3 | 63339909 | rs11071776 | 0.8808 | 64221010 | T | A | 0.50 | 5.49E-05 | 3.59E-02 | 7.54E-02 |
| rs12908891 | Brain_Frontal_Cortex_BA9 | 15 | AC100830.3    | 65002624 | rs11071776 | 0.8808 | 64221010 | T | A | 0.50 | 5.49E-05 | 4.74E-02 | 8.79E-02 |
| rs12908891 | Brain_Frontal_Cortex_BA9 | 15 | RP11-244F12.3 | 63339909 | rs11637858 | 0.8959 | 64224107 | C | T | 0.49 | 4.60E-05 | 1.85E-02 | 5.26E-02 |
| rs12908891 | Brain_Frontal_Cortex_BA9 | 15 | AC100830.3    | 65002624 | rs12916395 | 0.9921 | 64225563 | T | C | 0.51 | 1.86E-06 | 6.46E-03 | 1.70E-02 |
| rs12908891 | Brain_Frontal_Cortex_BA9 | 15 | PLEKHO2       | 65147147 | rs12916395 | 0.9921 | 64225563 | T | C | 0.51 | 1.86E-06 | 3.59E-02 | 5.34E-02 |
| rs12908891 | Brain_Frontal_Cortex_BA9 | 15 | AC100830.3    | 65002624 | rs11630587 | 0.9921 | 64225908 | C | T | 0.51 | 1.77E-06 | 1.52E-02 | 2.93E-02 |
| rs12908891 | Brain_Frontal_Cortex_BA9 | 15 | AC100830.3    | 65002624 | rs4776677  | 0.9921 | 64227044 | C | T | 0.51 | 1.54E-06 | 6.10E-03 | 1.63E-02 |
| rs12908891 | Brain_Frontal_Cortex_BA9 | 15 | PLEKHO2       | 65147147 | rs4776677  | 0.9921 | 64227044 | C | T | 0.51 | 1.54E-06 | 3.62E-02 | 5.35E-02 |
| rs12908891 | Brain_Frontal_Cortex_BA9 | 15 | AC100830.3    | 65002624 | rs11071777 | 0.8557 | 64229285 | C | G | 0.55 | 9.20E-06 | 2.75E-02 | 4.65E-02 |
| rs12908891 | Brain_Frontal_Cortex_BA9 | 15 | RP11-244F12.3 | 63339909 | rs1563886  | 0.9272 | 64230852 | G | C | 0.49 | 8.06E-06 | 4.55E-02 | 8.76E-02 |
| rs12908891 | Brain_Frontal_Cortex_BA9 | 15 | AC100830.3    | 65002624 | rs1563886  | 0.9272 | 64230852 | G | C | 0.49 | 8.06E-06 | 4.61E-02 | 8.83E-02 |
| rs12908891 | Brain_Frontal_Cortex_BA9 | 15 | AC100830.3    | 65002624 | rs10744961 | 0.9960 | 64230930 | A | G | 0.51 | 1.86E-06 | 1.03E-02 | 2.30E-02 |
| rs12908891 | Brain_Frontal_Cortex_BA9 | 15 | PLEKHO2       | 65147147 | rs10744961 | 0.9960 | 64230930 | A | G | 0.51 | 1.86E-06 | 4.77E-02 | 6.64E-02 |
| rs12908891 | Brain_Frontal_Cortex_BA9 | 15 | RP11-244F12.3 | 63339909 | rs6494454  | 0.8031 | 64233563 | A | C | 0.56 | 2.52E-05 | 4.26E-02 | 6.74E-02 |
| rs12908891 | Brain_Frontal_Cortex_BA9 | 15 | AC100830.3    | 65002624 | rs6494454  | 0.8031 | 64233563 | A | C | 0.56 | 2.52E-05 | 2.29E-02 | 4.51E-02 |
| rs12908891 | Brain_Frontal_Cortex_BA9 | 15 | PLEKHO2       | 65147147 | rs6494454  | 0.8031 | 64233563 | A | C | 0.56 | 2.52E-05 | 3.66E-02 | 6.09E-02 |
| rs12908891 | Brain_Frontal_Cortex_BA9 | 15 | RP11-244F12.3 | 63339909 | rs894660   | 0.8031 | 64234334 | C | T | 0.56 | 2.52E-05 | 4.26E-02 | 6.74E-02 |
| rs12908891 | Brain_Frontal_Cortex_BA9 | 15 | AC100830.3    | 65002624 | rs894660   | 0.8031 | 64234334 | C | T | 0.56 | 2.52E-05 | 2.29E-02 | 4.51E-02 |
| rs12908891 | Brain_Frontal_Cortex_BA9 | 15 | PLEKHO2       | 65147147 | rs894660   | 0.8031 | 64234334 | C | T | 0.56 | 2.52E-05 | 3.66E-02 | 6.09E-02 |
| rs12908891 | Brain_Frontal_Cortex_BA9 | 15 | AC100830.3    | 65002624 | rs4776266  | 0.8031 | 64236175 | G | T | 0.56 | 2.23E-05 | 1.78E-02 | 3.85E-02 |
| rs12908891 | Brain_Frontal_Cortex_BA9 | 15 | PLEKHO2       | 65147147 | rs4776266  | 0.8031 | 64236175 | G | T | 0.56 | 2.23E-05 | 2.36E-02 | 4.57E-02 |
| rs12908891 | Brain_Frontal_Cortex_BA9 | 15 | RP11-244F12.3 | 63339909 | rs4776268  | 1.0000 | 64236398 | A | G | 0.51 | 6.19E-06 | 3.51E-02 | 9.23E-02 |
| rs12908891 | Brain_Frontal_Cortex_BA9 | 15 | AC100830.3    | 65002624 | rs4776268  | 1.0000 | 64236398 | A | G | 0.51 | 6.19E-06 | 3.67E-02 | 9.41E-02 |
| rs12908891 | Brain_Frontal_Cortex_BA9 | 15 | AC100830.3    | 65002624 | rs12908891 | 1.0000 | 64236441 | A | G | 0.52 | 1.39E-06 | 1.67E-02 | 3.12E-02 |
| rs12908891 | Brain_Frontal_Cortex_BA9 | 15 | PLEKHO2       | 65147147 | rs12908891 | 1.0000 | 64236441 | A | G | 0.52 | 1.39E-06 | 4.73E-02 | 6.56E-02 |
| rs12908891 | Brain_Frontal_Cortex_BA9 | 15 | AC100830.3    | 65002624 | rs11071779 | 0.9881 | 64239044 | G | A | 0.51 | 1.57E-06 | 1.95E-02 | 3.52E-02 |
| rs12908891 | Brain_Frontal_Cortex_BA9 | 15 | RP11-244F12.3 | 63339909 | rs11071780 | 0.9842 | 64241691 | A | G | 0.51 | 4.74E-06 | 4.10E-02 | 1.01E-01 |
| rs12908891 | Brain_Frontal_Cortex_BA9 | 15 | AC100830.3    | 65002624 | rs11071780 | 0.9842 | 64241691 | A | G | 0.51 | 4.74E-06 | 3.78E-02 | 9.80E-02 |
| rs12908891 | Brain_Frontal_Cortex_BA9 | 15 | RP11-244F12.3 | 63339909 | rs11854537 | 0.9842 | 64241733 | A | G | 0.51 | 4.74E-06 | 4.10E-02 | 1.01E-01 |

|            |                          |    |               |          |             |        |          |   |   |      |          |          |          |
|------------|--------------------------|----|---------------|----------|-------------|--------|----------|---|---|------|----------|----------|----------|
| rs12908891 | Brain_Frontal_Cortex_BA9 | 15 | AC100830.3    | 65002624 | rs11854537  | 0.9842 | 64241733 | A | G | 0.51 | 4.74E-06 | 3.78E-02 | 9.80E-02 |
| rs12908891 | Brain_Frontal_Cortex_BA9 | 15 | RP11-244F12.3 | 63339909 | rs1380844   | 0.9881 | 64242007 | G | T | 0.51 | 4.74E-06 | 4.10E-02 | 1.01E-01 |
| rs12908891 | Brain_Frontal_Cortex_BA9 | 15 | AC100830.3    | 65002624 | rs1380844   | 0.9881 | 64242007 | G | T | 0.51 | 4.74E-06 | 3.78E-02 | 9.80E-02 |
| rs12908891 | Brain_Frontal_Cortex_BA9 | 15 | RP11-244F12.3 | 63339909 | rs12916806  | 0.9881 | 64242770 | C | A | 0.51 | 4.64E-06 | 4.10E-02 | 1.01E-01 |
| rs12908891 | Brain_Frontal_Cortex_BA9 | 15 | AC100830.3    | 65002624 | rs12916806  | 0.9881 | 64242770 | C | A | 0.51 | 4.64E-06 | 3.78E-02 | 9.79E-02 |
| rs12908891 | Brain_Frontal_Cortex_BA9 | 15 | RP11-244F12.3 | 63339909 | rs11071781  | 0.9195 | 64243933 | G | A | 0.49 | 4.75E-06 | 1.85E-02 | 5.70E-02 |
| rs12908891 | Brain_Frontal_Cortex_BA9 | 15 | RP11-244F12.3 | 63339909 | rs1304365   | 0.9881 | 64245946 | A | G | 0.51 | 4.67E-06 | 3.51E-02 | 9.50E-02 |
| rs12908891 | Brain_Frontal_Cortex_BA9 | 15 | AC100830.3    | 65002624 | rs1304365   | 0.9881 | 64245946 | A | G | 0.51 | 4.67E-06 | 3.67E-02 | 9.67E-02 |
| rs12908891 | Brain_Frontal_Cortex_BA9 | 15 | RP11-244F12.3 | 63339909 | rs145159458 | 0.9119 | 64252880 | T | C | 0.49 | 1.21E-05 | 4.55E-02 | 9.98E-02 |
| rs12908891 | Brain_Frontal_Cortex_BA9 | 15 | AC100830.3    | 65002624 | rs145159458 | 0.9119 | 64252880 | T | C | 0.49 | 1.21E-05 | 4.61E-02 | 1.00E-01 |
| rs12908891 | Brain_Frontal_Cortex_BA9 | 15 | RP11-244F12.3 | 63339909 | rs4776692   | 0.9881 | 64255083 | G | A | 0.50 | 1.06E-05 | 4.10E-02 | 1.11E-01 |
| rs12908891 | Brain_Frontal_Cortex_BA9 | 15 | AC100830.3    | 65002624 | rs4776692   | 0.9881 | 64255083 | G | A | 0.50 | 1.06E-05 | 3.78E-02 | 1.07E-01 |
| rs12908891 | Brain_Frontal_Cortex_BA9 | 15 | RP11-244F12.3 | 63339909 | rs28822416  | 0.8420 | 64257845 | C | T | 0.45 | 1.54E-05 | 4.82E-02 | 7.62E-02 |
| rs12908891 | Brain_Frontal_Cortex_BA9 | 15 | AC100830.3    | 65002624 | rs28822416  | 0.8420 | 64257845 | C | T | 0.45 | 1.54E-05 | 4.02E-02 | 6.75E-02 |
| rs12908891 | Brain_Frontal_Cortex_BA9 | 15 | RP11-244F12.3 | 63339909 | rs8035776   | 0.8420 | 64258018 | G | A | 0.45 | 1.54E-05 | 4.82E-02 | 7.62E-02 |
| rs12908891 | Brain_Frontal_Cortex_BA9 | 15 | AC100830.3    | 65002624 | rs8035776   | 0.8420 | 64258018 | G | A | 0.45 | 1.54E-05 | 4.02E-02 | 6.75E-02 |
| rs12908891 | Brain_Frontal_Cortex_BA9 | 15 | RP11-244F12.3 | 63339909 | rs6494456   | 0.8381 | 64258260 | C | T | 0.45 | 1.54E-05 | 4.82E-02 | 7.62E-02 |
| rs12908891 | Brain_Frontal_Cortex_BA9 | 15 | AC100830.3    | 65002624 | rs6494456   | 0.8381 | 64258260 | C | T | 0.45 | 1.54E-05 | 4.02E-02 | 6.75E-02 |
| rs12908891 | Brain_Hippocampus        | 15 | AC100830.4    | 64987516 | rs1460544   | 0.8736 | 64201766 | T | C | 0.51 | 9.06E-04 | 4.92E-02 | 1.67E-01 |
| rs12908891 | Brain_Hippocampus        | 15 | AC100830.4    | 64987516 | rs11071773  | 0.8883 | 64206765 | A | G | 0.51 | 8.95E-04 | 4.52E-02 | 1.37E-01 |
| rs12908891 | Brain_Hippocampus        | 15 | AC100830.4    | 64987516 | rs12909081  | 0.8809 | 64208260 | A | C | 0.51 | 1.00E-03 | 4.68E-02 | 1.42E-01 |
| rs12908891 | Brain_Hippocampus        | 15 | AC100830.4    | 64987516 | rs2414844   | 0.8846 | 64210675 | A | G | 0.51 | 9.01E-04 | 4.68E-02 | 1.39E-01 |
| rs12908891 | Brain_Hippocampus        | 15 | AC100830.4    | 64987516 | rs12592060  | 0.8846 | 64210780 | T | C | 0.51 | 9.01E-04 | 4.68E-02 | 1.39E-01 |
| rs12908891 | Brain_Hippocampus        | 15 | AC100830.4    | 64987516 | rs1471282   | 0.8846 | 64212275 | G | T | 0.51 | 1.07E-03 | 4.68E-02 | 1.45E-01 |
| rs12908891 | Brain_Hippocampus        | 15 | AC100830.4    | 64987516 | rs11853632  | 0.8921 | 64217845 | C | G | 0.50 | 4.21E-05 | 4.28E-02 | 8.16E-02 |
| rs12908891 | Brain_Hippocampus        | 15 | AC100830.4    | 64987516 | rs12907405  | 0.8884 | 64220046 | T | C | 0.50 | 4.35E-05 | 3.03E-02 | 6.78E-02 |
| rs12908891 | Brain_Hippocampus        | 15 | AC100830.4    | 64987516 | rs11071775  | 0.8808 | 64220995 | A | G | 0.50 | 4.81E-05 | 3.74E-02 | 7.60E-02 |
| rs12908891 | Brain_Hippocampus        | 15 | AC100830.4    | 64987516 | rs11071776  | 0.8808 | 64221010 | T | A | 0.50 | 5.49E-05 | 3.74E-02 | 7.70E-02 |
| rs12908891 | Brain_Hippocampus        | 15 | AC100830.4    | 64987516 | rs11637858  | 0.8959 | 64224107 | C | T | 0.49 | 4.60E-05 | 3.74E-02 | 7.56E-02 |
| rs12908891 | Brain_Hippocampus        | 15 | AC100830.4    | 64987516 | rs12916395  | 0.9921 | 64225563 | T | C | 0.51 | 1.86E-06 | 3.79E-02 | 5.56E-02 |
| rs12908891 | Brain_Hippocampus        | 15 | AC100830.4    | 64987516 | rs11630587  | 0.9921 | 64225908 | C | T | 0.51 | 1.77E-06 | 4.89E-02 | 6.72E-02 |
| rs12908891 | Brain_Hippocampus        | 15 | LACTB         | 63424129 | rs11071777  | 0.8557 | 64229285 | C | G | 0.55 | 9.20E-06 | 2.62E-02 | 4.50E-02 |
| rs12908891 | Brain_Hippocampus        | 15 | AC100830.4    | 64987516 | rs11071777  | 0.8557 | 64229285 | C | G | 0.55 | 9.20E-06 | 7.92E-03 | 2.12E-02 |
| rs12908891 | Brain_Hippocampus        | 15 | AC100830.4    | 64987516 | rs1563886   | 0.9272 | 64230852 | G | C | 0.49 | 8.06E-06 | 3.28E-02 | 7.36E-02 |
| rs12908891 | Brain_Hippocampus        | 15 | AC100830.4    | 64987516 | rs10744961  | 0.9960 | 64230930 | A | G | 0.51 | 1.86E-06 | 4.73E-02 | 6.60E-02 |
| rs12908891 | Brain_Hippocampus        | 15 | AC100830.4    | 64987516 | rs4776268   | 1.0000 | 64236398 | A | G | 0.51 | 6.19E-06 | 2.25E-02 | 7.70E-02 |
| rs12908891 | Brain_Hippocampus        | 15 | FBXL22        | 63892089 | rs12908891  | 1.0000 | 64236441 | A | G | 0.52 | 1.39E-06 | 4.97E-02 | 6.81E-02 |
| rs12908891 | Brain_Hippocampus        | 15 | AC100830.4    | 64987516 | rs12908891  | 1.0000 | 64236441 | A | G | 0.52 | 1.39E-06 | 4.44E-02 | 6.25E-02 |
| rs12908891 | Brain_Hippocampus        | 15 | AC100830.4    | 64987516 | rs11071779  | 0.9881 | 64239044 | G | A | 0.51 | 1.57E-06 | 2.58E-02 | 4.27E-02 |
| rs12908891 | Brain_Hippocampus        | 15 | AC100830.4    | 64987516 | rs11071780  | 0.9842 | 64241691 | A | G | 0.51 | 4.74E-06 | 2.25E-02 | 7.96E-02 |

|            |                                       |    |               |          |             |        |          |   |   |      |          |          |          |
|------------|---------------------------------------|----|---------------|----------|-------------|--------|----------|---|---|------|----------|----------|----------|
| rs12908891 | Brain_Hippocampus                     | 15 | AC100830.4    | 64987516 | rs11854537  | 0.9842 | 64241733 | A | G | 0.51 | 4.74E-06 | 2.25E-02 | 7.96E-02 |
| rs12908891 | Brain_Hippocampus                     | 15 | AC100830.4    | 64987516 | rs1380844   | 0.9881 | 64242007 | G | T | 0.51 | 4.74E-06 | 2.25E-02 | 7.96E-02 |
| rs12908891 | Brain_Hippocampus                     | 15 | AC100830.4    | 64987516 | rs12916806  | 0.9881 | 64242770 | C | A | 0.51 | 4.64E-06 | 2.25E-02 | 7.96E-02 |
| rs12908891 | Brain_Hippocampus                     | 15 | AC100830.4    | 64987516 | rs11071781  | 0.9195 | 64243933 | G | A | 0.49 | 4.75E-06 | 3.74E-02 | 8.02E-02 |
| rs12908891 | Brain_Hippocampus                     | 15 | AC100830.4    | 64987516 | rs1304365   | 0.9881 | 64245946 | A | G | 0.51 | 4.67E-06 | 2.25E-02 | 7.97E-02 |
| rs12908891 | Brain_Hippocampus                     | 15 | AC100830.4    | 64987516 | rs145159458 | 0.9119 | 64252880 | T | C | 0.49 | 1.21E-05 | 3.28E-02 | 8.58E-02 |
| rs12908891 | Brain_Hippocampus                     | 15 | AC100830.4    | 64987516 | rs4776692   | 0.9881 | 64255083 | G | A | 0.50 | 1.06E-05 | 2.25E-02 | 8.89E-02 |
| rs12908891 | Brain_Hippocampus                     | 15 | FBXL22        | 63892089 | rs28822416  | 0.8420 | 64257845 | C | T | 0.45 | 1.54E-05 | 4.15E-02 | 6.90E-02 |
| rs12908891 | Brain_Hippocampus                     | 15 | FBXL22        | 63892089 | rs8035776   | 0.8420 | 64258018 | G | A | 0.45 | 1.54E-05 | 4.15E-02 | 6.90E-02 |
| rs12908891 | Brain_Hippocampus                     | 15 | FBXL22        | 63892089 | rs6494456   | 0.8381 | 64258260 | C | T | 0.45 | 1.54E-05 | 4.15E-02 | 6.90E-02 |
| rs12908891 | Brain_Hippocampus                     | 15 | RAB8B         | 63520824 | rs4776695   | 0.8350 | 64259115 | T | C | 0.46 | 9.12E-06 | 3.32E-02 | 5.67E-02 |
| rs12908891 | Brain_Hypothalamus                    | 15 | CA12          | 63643968 | rs749468    | 0.9493 | 64210279 | T | C | 0.53 | 2.79E-04 | 4.01E-02 | 7.20E-02 |
| rs12908891 | Brain_Hypothalamus                    | 15 | CA12          | 63643968 | rs12904374  | 0.8808 | 64214670 | T | A | 0.51 | 8.63E-04 | 4.81E-02 | 8.40E-02 |
| rs12908891 | Brain_Hypothalamus                    | 15 | CA12          | 63643968 | rs920762    | 0.9379 | 64214954 | C | G | 0.47 | 1.24E-05 | 2.58E-02 | 4.45E-02 |
| rs12908891 | Brain_Hypothalamus                    | 15 | CA12          | 63643968 | rs6494454   | 0.8031 | 64233563 | A | C | 0.56 | 2.52E-05 | 2.48E-02 | 4.73E-02 |
| rs12908891 | Brain_Hypothalamus                    | 15 | CA12          | 63643968 | rs894660    | 0.8031 | 64234334 | C | T | 0.56 | 2.52E-05 | 2.48E-02 | 4.73E-02 |
| rs12908891 | Brain_Hypothalamus                    | 15 | CA12          | 63643968 | rs4776266   | 0.8031 | 64236175 | G | T | 0.56 | 2.23E-05 | 2.48E-02 | 4.71E-02 |
| rs12908891 | Brain_Nucleus_accumbens_basal_ganglia | 15 | TPM1          | 63349472 | rs1460544   | 0.8736 | 64201766 | T | C | 0.51 | 9.06E-04 | 3.59E-02 | 1.54E-01 |
| rs12908891 | Brain_Nucleus_accumbens_basal_ganglia | 15 | USP3-AS1      | 63864970 | rs1460544   | 0.8736 | 64201766 | T | C | 0.51 | 9.06E-04 | 1.07E-02 | 1.22E-01 |
| rs12908891 | Brain_Nucleus_accumbens_basal_ganglia | 15 | PIIB          | 64453853 | rs1460544   | 0.8736 | 64201766 | T | C | 0.51 | 9.06E-04 | 3.26E-02 | 1.51E-01 |
| rs12908891 | Brain_Nucleus_accumbens_basal_ganglia | 15 | TPM1          | 63349472 | rs1037846   | 0.8696 | 64204870 | G | A | 0.51 | 6.33E-04 | 4.44E-02 | 7.73E-02 |
| rs12908891 | Brain_Nucleus_accumbens_basal_ganglia | 15 | USP3-AS1      | 63864970 | rs1037846   | 0.8696 | 64204870 | G | A | 0.51 | 6.33E-04 | 1.55E-02 | 4.28E-02 |
| rs12908891 | Brain_Nucleus_accumbens_basal_ganglia | 15 | PIIB          | 64453853 | rs1037846   | 0.8696 | 64204870 | G | A | 0.51 | 6.33E-04 | 4.00E-02 | 7.25E-02 |
| rs12908891 | Brain_Nucleus_accumbens_basal_ganglia | 15 | TPM1          | 63349472 | rs11071773  | 0.8883 | 64206765 | A | G | 0.51 | 8.95E-04 | 3.22E-02 | 1.23E-01 |
| rs12908891 | Brain_Nucleus_accumbens_basal_ganglia | 15 | USP3-AS1      | 63864970 | rs11071773  | 0.8883 | 64206765 | A | G | 0.51 | 8.95E-04 | 2.28E-02 | 1.12E-01 |
| rs12908891 | Brain_Nucleus_accumbens_basal_ganglia | 15 | PIIB          | 64453853 | rs11071773  | 0.8883 | 64206765 | A | G | 0.51 | 8.95E-04 | 2.62E-02 | 1.16E-01 |
| rs12908891 | Brain_Nucleus_accumbens_basal_ganglia | 15 | RP11-244F12.3 | 63339909 | rs12909081  | 0.8809 | 64208260 | A | C | 0.51 | 1.00E-03 | 4.46E-02 | 1.40E-01 |
| rs12908891 | Brain_Nucleus_accumbens_basal_ganglia | 15 | TPM1          | 63349472 | rs12909081  | 0.8809 | 64208260 | A | C | 0.51 | 1.00E-03 | 3.77E-02 | 1.33E-01 |
| rs12908891 | Brain_Nucleus_accumbens_basal_ganglia | 15 | USP3-AS1      | 63864970 | rs12909081  | 0.8809 | 64208260 | A | C | 0.51 | 1.00E-03 | 1.38E-02 | 1.03E-01 |
| rs12908891 | Brain_Nucleus_accumbens_basal_ganglia | 15 | PIIB          | 64453853 | rs12909081  | 0.8809 | 64208260 | A | C | 0.51 | 1.00E-03 | 1.97E-02 | 1.12E-01 |
| rs12908891 | Brain_Nucleus_accumbens_basal_ganglia | 15 | TPM1          | 63349472 | rs749468    | 0.9493 | 64210279 | T | C | 0.53 | 2.79E-04 | 4.28E-02 | 7.50E-02 |
| rs12908891 | Brain_Nucleus_accumbens_basal_ganglia | 15 | USP3-AS1      | 63864970 | rs749468    | 0.9493 | 64210279 | T | C | 0.53 | 2.79E-04 | 2.16E-02 | 5.04E-02 |
| rs12908891 | Brain_Nucleus_accumbens_basal_ganglia | 15 | PIIB          | 64453853 | rs749468    | 0.9493 | 64210279 | T | C | 0.53 | 2.79E-04 | 3.46E-02 | 6.58E-02 |
| rs12908891 | Brain_Nucleus_accumbens_basal_ganglia | 15 | RP11-244F12.3 | 63339909 | rs2414844   | 0.8846 | 64210675 | A | G | 0.51 | 9.01E-04 | 4.46E-02 | 1.37E-01 |
| rs12908891 | Brain_Nucleus_accumbens_basal_ganglia | 15 | TPM1          | 63349472 | rs2414844   | 0.8846 | 64210675 | A | G | 0.51 | 9.01E-04 | 3.77E-02 | 1.30E-01 |
| rs12908891 | Brain_Nucleus_accumbens_basal_ganglia | 15 | USP3-AS1      | 63864970 | rs2414844   | 0.8846 | 64210675 | A | G | 0.51 | 9.01E-04 | 1.38E-02 | 1.00E-01 |
| rs12908891 | Brain_Nucleus_accumbens_basal_ganglia | 15 | PIIB          | 64453853 | rs2414844   | 0.8846 | 64210675 | A | G | 0.51 | 9.01E-04 | 1.97E-02 | 1.09E-01 |
| rs12908891 | Brain_Nucleus_accumbens_basal_ganglia | 15 | RP11-244F12.3 | 63339909 | rs12592060  | 0.8846 | 64210780 | T | C | 0.51 | 9.01E-04 | 4.46E-02 | 1.37E-01 |
| rs12908891 | Brain_Nucleus_accumbens_basal_ganglia | 15 | TPM1          | 63349472 | rs12592060  | 0.8846 | 64210780 | T | C | 0.51 | 9.01E-04 | 3.77E-02 | 1.30E-01 |
| rs12908891 | Brain_Nucleus_accumbens_basal_ganglia | 15 | USP3-AS1      | 63864970 | rs12592060  | 0.8846 | 64210780 | T | C | 0.51 | 9.01E-04 | 1.38E-02 | 1.00E-01 |

|            |                                       |    |                      |          |            |        |          |   |   |      |          |          |          |
|------------|---------------------------------------|----|----------------------|----------|------------|--------|----------|---|---|------|----------|----------|----------|
| rs12908891 | Brain_Nucleus_accumbens_basal_ganglia | 15 | <i>PP1B</i>          | 64453853 | rs12592060 | 0.8846 | 64210780 | T | C | 0.51 | 9.01E-04 | 1.97E-02 | 1.09E-01 |
| rs12908891 | Brain_Nucleus_accumbens_basal_ganglia | 15 | <i>RP11-244F12.3</i> | 63339909 | rs1471282  | 0.8846 | 64212275 | G | T | 0.51 | 1.07E-03 | 4.46E-02 | 1.43E-01 |
| rs12908891 | Brain_Nucleus_accumbens_basal_ganglia | 15 | <i>TPM1</i>          | 63349472 | rs1471282  | 0.8846 | 64212275 | G | T | 0.51 | 1.07E-03 | 3.77E-02 | 1.36E-01 |
| rs12908891 | Brain_Nucleus_accumbens_basal_ganglia | 15 | <i>USP3-AS1</i>      | 63864970 | rs1471282  | 0.8846 | 64212275 | G | T | 0.51 | 1.07E-03 | 1.38E-02 | 1.07E-01 |
| rs12908891 | Brain_Nucleus_accumbens_basal_ganglia | 15 | <i>PP1B</i>          | 64453853 | rs1471282  | 0.8846 | 64212275 | G | T | 0.51 | 1.07E-03 | 1.97E-02 | 1.15E-01 |
| rs12908891 | Brain_Nucleus_accumbens_basal_ganglia | 15 | <i>RP11-244F12.3</i> | 63339909 | rs11635779 | 0.8808 | 64213826 | T | C | 0.50 | 6.34E-05 | 4.09E-02 | 8.26E-02 |
| rs12908891 | Brain_Nucleus_accumbens_basal_ganglia | 15 | <i>TPM1</i>          | 63349472 | rs11635779 | 0.8808 | 64213826 | T | C | 0.50 | 6.34E-05 | 3.08E-02 | 7.12E-02 |
| rs12908891 | Brain_Nucleus_accumbens_basal_ganglia | 15 | <i>USP3-AS1</i>      | 63864970 | rs11635779 | 0.8808 | 64213826 | T | C | 0.50 | 6.34E-05 | 1.86E-02 | 5.58E-02 |
| rs12908891 | Brain_Nucleus_accumbens_basal_ganglia | 15 | <i>PP1B</i>          | 64453853 | rs11635779 | 0.8808 | 64213826 | T | C | 0.50 | 6.34E-05 | 2.39E-02 | 6.28E-02 |
| rs12908891 | Brain_Nucleus_accumbens_basal_ganglia | 15 | <i>TPM1</i>          | 63349472 | rs12904374 | 0.8808 | 64214670 | T | A | 0.51 | 8.63E-04 | 2.61E-02 | 5.92E-02 |
| rs12908891 | Brain_Nucleus_accumbens_basal_ganglia | 15 | <i>USP3-AS1</i>      | 63864970 | rs12904374 | 0.8808 | 64214670 | T | A | 0.51 | 8.63E-04 | 2.94E-02 | 6.31E-02 |
| rs12908891 | Brain_Nucleus_accumbens_basal_ganglia | 15 | <i>PP1B</i>          | 64453853 | rs12904374 | 0.8808 | 64214670 | T | A | 0.51 | 8.63E-04 | 3.11E-02 | 6.51E-02 |
| rs12908891 | Brain_Nucleus_accumbens_basal_ganglia | 15 | <i>USP3-AS1</i>      | 63864970 | rs920762   | 0.9379 | 64214954 | C | G | 0.47 | 1.24E-05 | 2.71E-02 | 4.60E-02 |
| rs12908891 | Brain_Nucleus_accumbens_basal_ganglia | 15 | <i>TPM1</i>          | 63349472 | rs11853632 | 0.8921 | 64217845 | C | G | 0.50 | 4.21E-05 | 3.51E-02 | 7.31E-02 |
| rs12908891 | Brain_Nucleus_accumbens_basal_ganglia | 15 | <i>USP3-AS1</i>      | 63864970 | rs11853632 | 0.8921 | 64217845 | C | G | 0.50 | 4.21E-05 | 1.50E-02 | 4.77E-02 |
| rs12908891 | Brain_Nucleus_accumbens_basal_ganglia | 15 | <i>PP1B</i>          | 64453853 | rs11853632 | 0.8921 | 64217845 | C | G | 0.50 | 4.21E-05 | 3.15E-02 | 6.89E-02 |
| rs12908891 | Brain_Nucleus_accumbens_basal_ganglia | 15 | <i>RP11-244F12.3</i> | 63339909 | rs12907405 | 0.8884 | 64220046 | T | C | 0.50 | 4.35E-05 | 3.87E-02 | 7.74E-02 |
| rs12908891 | Brain_Nucleus_accumbens_basal_ganglia | 15 | <i>TPM1</i>          | 63349472 | rs12907405 | 0.8884 | 64220046 | T | C | 0.50 | 4.35E-05 | 4.61E-02 | 8.54E-02 |
| rs12908891 | Brain_Nucleus_accumbens_basal_ganglia | 15 | <i>USP3-AS1</i>      | 63864970 | rs12907405 | 0.8884 | 64220046 | T | C | 0.50 | 4.35E-05 | 1.62E-02 | 4.97E-02 |
| rs12908891 | Brain_Nucleus_accumbens_basal_ganglia | 15 | <i>PP1B</i>          | 64453853 | rs12907405 | 0.8884 | 64220046 | T | C | 0.50 | 4.35E-05 | 2.79E-02 | 6.50E-02 |
| rs12908891 | Brain_Nucleus_accumbens_basal_ganglia | 15 | <i>RP11-244F12.3</i> | 63339909 | rs11071775 | 0.8808 | 64220995 | A | G | 0.50 | 4.81E-05 | 3.09E-02 | 6.86E-02 |
| rs12908891 | Brain_Nucleus_accumbens_basal_ganglia | 15 | <i>TPM1</i>          | 63349472 | rs11071775 | 0.8808 | 64220995 | A | G | 0.50 | 4.81E-05 | 4.50E-02 | 8.44E-02 |
| rs12908891 | Brain_Nucleus_accumbens_basal_ganglia | 15 | <i>USP3-AS1</i>      | 63864970 | rs11071775 | 0.8808 | 64220995 | A | G | 0.50 | 4.81E-05 | 2.01E-02 | 5.52E-02 |
| rs12908891 | Brain_Nucleus_accumbens_basal_ganglia | 15 | <i>PP1B</i>          | 64453853 | rs11071775 | 0.8808 | 64220995 | A | G | 0.50 | 4.81E-05 | 2.72E-02 | 6.42E-02 |
| rs12908891 | Brain_Nucleus_accumbens_basal_ganglia | 15 | <i>RP11-244F12.3</i> | 63339909 | rs11071776 | 0.8808 | 64221010 | T | A | 0.50 | 5.49E-05 | 3.09E-02 | 6.96E-02 |
| rs12908891 | Brain_Nucleus_accumbens_basal_ganglia | 15 | <i>TPM1</i>          | 63349472 | rs11071776 | 0.8808 | 64221010 | T | A | 0.50 | 5.49E-05 | 4.50E-02 | 8.54E-02 |
| rs12908891 | Brain_Nucleus_accumbens_basal_ganglia | 15 | <i>USP3-AS1</i>      | 63864970 | rs11071776 | 0.8808 | 64221010 | T | A | 0.50 | 5.49E-05 | 2.01E-02 | 5.62E-02 |
| rs12908891 | Brain_Nucleus_accumbens_basal_ganglia | 15 | <i>PP1B</i>          | 64453853 | rs11071776 | 0.8808 | 64221010 | T | A | 0.50 | 5.49E-05 | 2.72E-02 | 6.51E-02 |
| rs12908891 | Brain_Nucleus_accumbens_basal_ganglia | 15 | <i>RP11-244F12.3</i> | 63339909 | rs11637858 | 0.8959 | 64224107 | C | T | 0.49 | 4.60E-05 | 3.49E-02 | 7.28E-02 |
| rs12908891 | Brain_Nucleus_accumbens_basal_ganglia | 15 | <i>USP3-AS1</i>      | 63864970 | rs11637858 | 0.8959 | 64224107 | C | T | 0.49 | 4.60E-05 | 1.45E-02 | 4.69E-02 |
| rs12908891 | Brain_Nucleus_accumbens_basal_ganglia | 15 | <i>PP1B</i>          | 64453853 | rs11637858 | 0.8959 | 64224107 | C | T | 0.49 | 4.60E-05 | 2.67E-02 | 6.32E-02 |
| rs12908891 | Brain_Nucleus_accumbens_basal_ganglia | 15 | <i>USP3-AS1</i>      | 63864970 | rs12916395 | 0.9921 | 64225563 | T | C | 0.51 | 1.86E-06 | 1.16E-02 | 2.46E-02 |
| rs12908891 | Brain_Nucleus_accumbens_basal_ganglia | 15 | <i>SNX22</i>         | 64446798 | rs12916395 | 0.9921 | 64225563 | T | C | 0.51 | 1.86E-06 | 3.81E-02 | 5.58E-02 |
| rs12908891 | Brain_Nucleus_accumbens_basal_ganglia | 15 | <i>USP3-AS1</i>      | 63864970 | rs11630587 | 0.9921 | 64225908 | C | T | 0.51 | 1.77E-06 | 2.20E-02 | 3.76E-02 |
| rs12908891 | Brain_Nucleus_accumbens_basal_ganglia | 15 | <i>USP3-AS1</i>      | 63864970 | rs4776677  | 0.9921 | 64227044 | C | T | 0.51 | 1.54E-06 | 1.14E-02 | 2.40E-02 |
| rs12908891 | Brain_Nucleus_accumbens_basal_ganglia | 15 | <i>USP3-AS1</i>      | 63864970 | rs11071777 | 0.8557 | 64229285 | C | G | 0.55 | 9.20E-06 | 5.13E-03 | 1.66E-02 |
| rs12908891 | Brain_Nucleus_accumbens_basal_ganglia | 15 | <i>SNX22</i>         | 64446798 | rs11071777 | 0.8557 | 64229285 | C | G | 0.55 | 9.20E-06 | 1.77E-02 | 3.48E-02 |
| rs12908891 | Brain_Nucleus_accumbens_basal_ganglia | 15 | <i>RP11-244F12.3</i> | 63339909 | rs1563886  | 0.9272 | 64230852 | G | C | 0.49 | 8.06E-06 | 4.28E-02 | 8.47E-02 |
| rs12908891 | Brain_Nucleus_accumbens_basal_ganglia | 15 | <i>RP11-321G12.1</i> | 63705841 | rs1563886  | 0.9272 | 64230852 | G | C | 0.49 | 8.06E-06 | 4.61E-02 | 8.82E-02 |
| rs12908891 | Brain_Nucleus_accumbens_basal_ganglia | 15 | <i>USP3-AS1</i>      | 63864970 | rs1563886  | 0.9272 | 64230852 | G | C | 0.49 | 8.06E-06 | 2.07E-02 | 5.86E-02 |

|            |                                       |    |                      |          |             |        |          |   |   |      |          |          |          |
|------------|---------------------------------------|----|----------------------|----------|-------------|--------|----------|---|---|------|----------|----------|----------|
| rs12908891 | Brain_Nucleus_accumbens_basal_ganglia | 15 | <i>PPIB</i>          | 64453853 | rs1563886   | 0.9272 | 64230852 | G | C | 0.49 | 8.06E-06 | 3.22E-02 | 7.28E-02 |
| rs12908891 | Brain_Nucleus_accumbens_basal_ganglia | 15 | <i>USP3-AS1</i>      | 63864970 | rs10744961  | 0.9960 | 64230930 | A | G | 0.51 | 1.86E-06 | 1.64E-02 | 3.11E-02 |
| rs12908891 | Brain_Nucleus_accumbens_basal_ganglia | 15 | <i>USP3-AS1</i>      | 63864970 | rs6494454   | 0.8031 | 64233563 | A | C | 0.56 | 2.52E-05 | 9.58E-03 | 2.71E-02 |
| rs12908891 | Brain_Nucleus_accumbens_basal_ganglia | 15 | <i>USP3-AS1</i>      | 63864970 | rs894660    | 0.8031 | 64234334 | C | T | 0.56 | 2.52E-05 | 9.58E-03 | 2.71E-02 |
| rs12908891 | Brain_Nucleus_accumbens_basal_ganglia | 15 | <i>USP3-AS1</i>      | 63864970 | rs4776266   | 0.8031 | 64236175 | G | T | 0.56 | 2.23E-05 | 7.63E-03 | 2.38E-02 |
| rs12908891 | Brain_Nucleus_accumbens_basal_ganglia | 15 | <i>USP3-AS1</i>      | 63864970 | rs4776268   | 1.0000 | 64236398 | A | G | 0.51 | 6.19E-06 | 1.44E-02 | 6.55E-02 |
| rs12908891 | Brain_Nucleus_accumbens_basal_ganglia | 15 | <i>SNX22</i>         | 64446798 | rs4776268   | 1.0000 | 64236398 | A | G | 0.51 | 6.19E-06 | 4.81E-02 | 1.06E-01 |
| rs12908891 | Brain_Nucleus_accumbens_basal_ganglia | 15 | <i>PPIB</i>          | 64453853 | rs4776268   | 1.0000 | 64236398 | A | G | 0.51 | 6.19E-06 | 4.24E-02 | 1.00E-01 |
| rs12908891 | Brain_Nucleus_accumbens_basal_ganglia | 15 | <i>RP11-244F12.3</i> | 63339909 | rs12908891  | 1.0000 | 64236441 | A | G | 0.52 | 1.39E-06 | 3.96E-02 | 5.74E-02 |
| rs12908891 | Brain_Nucleus_accumbens_basal_ganglia | 15 | <i>USP3-AS1</i>      | 63864970 | rs12908891  | 1.0000 | 64236441 | A | G | 0.52 | 1.39E-06 | 7.63E-03 | 1.88E-02 |
| rs12908891 | Brain_Nucleus_accumbens_basal_ganglia | 15 | <i>SNX22</i>         | 64446798 | rs12908891  | 1.0000 | 64236441 | A | G | 0.52 | 1.39E-06 | 3.18E-02 | 4.89E-02 |
| rs12908891 | Brain_Nucleus_accumbens_basal_ganglia | 15 | <i>USP3-AS1</i>      | 63864970 | rs11071779  | 0.9881 | 64239044 | G | A | 0.51 | 1.57E-06 | 7.78E-03 | 1.95E-02 |
| rs12908891 | Brain_Nucleus_accumbens_basal_ganglia | 15 | <i>SNX22</i>         | 64446798 | rs11071779  | 0.9881 | 64239044 | G | A | 0.51 | 1.57E-06 | 1.65E-02 | 3.14E-02 |
| rs12908891 | Brain_Nucleus_accumbens_basal_ganglia | 15 | <i>PPIB</i>          | 64453853 | rs11071779  | 0.9881 | 64239044 | G | A | 0.51 | 1.57E-06 | 4.44E-02 | 6.31E-02 |
| rs12908891 | Brain_Nucleus_accumbens_basal_ganglia | 15 | <i>RP11-321G12.1</i> | 63705841 | rs11071780  | 0.9842 | 64241691 | A | G | 0.51 | 4.74E-06 | 4.48E-02 | 1.06E-01 |
| rs12908891 | Brain_Nucleus_accumbens_basal_ganglia | 15 | <i>USP3-AS1</i>      | 63864970 | rs11071780  | 0.9842 | 64241691 | A | G | 0.51 | 4.74E-06 | 8.42E-03 | 5.76E-02 |
| rs12908891 | Brain_Nucleus_accumbens_basal_ganglia | 15 | <i>SNX22</i>         | 64446798 | rs11071780  | 0.9842 | 64241691 | A | G | 0.51 | 4.74E-06 | 1.83E-02 | 7.39E-02 |
| rs12908891 | Brain_Nucleus_accumbens_basal_ganglia | 15 | <i>PPIB</i>          | 64453853 | rs11071780  | 0.9842 | 64241691 | A | G | 0.51 | 4.74E-06 | 2.22E-02 | 7.92E-02 |
| rs12908891 | Brain_Nucleus_accumbens_basal_ganglia | 15 | <i>RP11-321G12.1</i> | 63705841 | rs11854537  | 0.9842 | 64241733 | A | G | 0.51 | 4.74E-06 | 4.48E-02 | 1.06E-01 |
| rs12908891 | Brain_Nucleus_accumbens_basal_ganglia | 15 | <i>USP3-AS1</i>      | 63864970 | rs11854537  | 0.9842 | 64241733 | A | G | 0.51 | 4.74E-06 | 8.42E-03 | 5.76E-02 |
| rs12908891 | Brain_Nucleus_accumbens_basal_ganglia | 15 | <i>SNX22</i>         | 64446798 | rs11854537  | 0.9842 | 64241733 | A | G | 0.51 | 4.74E-06 | 1.83E-02 | 7.39E-02 |
| rs12908891 | Brain_Nucleus_accumbens_basal_ganglia | 15 | <i>PPIB</i>          | 64453853 | rs11854537  | 0.9842 | 64241733 | A | G | 0.51 | 4.74E-06 | 2.22E-02 | 7.92E-02 |
| rs12908891 | Brain_Nucleus_accumbens_basal_ganglia | 15 | <i>RP11-321G12.1</i> | 63705841 | rs1380844   | 0.9881 | 64242007 | G | T | 0.51 | 4.74E-06 | 4.48E-02 | 1.06E-01 |
| rs12908891 | Brain_Nucleus_accumbens_basal_ganglia | 15 | <i>USP3-AS1</i>      | 63864970 | rs1380844   | 0.9881 | 64242007 | G | T | 0.51 | 4.74E-06 | 8.42E-03 | 5.76E-02 |
| rs12908891 | Brain_Nucleus_accumbens_basal_ganglia | 15 | <i>SNX22</i>         | 64446798 | rs1380844   | 0.9881 | 64242007 | G | T | 0.51 | 4.74E-06 | 1.83E-02 | 7.39E-02 |
| rs12908891 | Brain_Nucleus_accumbens_basal_ganglia | 15 | <i>PPIB</i>          | 64453853 | rs1380844   | 0.9881 | 64242007 | G | T | 0.51 | 4.74E-06 | 2.22E-02 | 7.92E-02 |
| rs12908891 | Brain_Nucleus_accumbens_basal_ganglia | 15 | <i>RP11-321G12.1</i> | 63705841 | rs12916806  | 0.9881 | 64242770 | C | A | 0.51 | 4.64E-06 | 4.48E-02 | 1.06E-01 |
| rs12908891 | Brain_Nucleus_accumbens_basal_ganglia | 15 | <i>USP3-AS1</i>      | 63864970 | rs12916806  | 0.9881 | 64242770 | C | A | 0.51 | 4.64E-06 | 8.42E-03 | 5.76E-02 |
| rs12908891 | Brain_Nucleus_accumbens_basal_ganglia | 15 | <i>SNX22</i>         | 64446798 | rs12916806  | 0.9881 | 64242770 | C | A | 0.51 | 4.64E-06 | 1.83E-02 | 7.39E-02 |
| rs12908891 | Brain_Nucleus_accumbens_basal_ganglia | 15 | <i>PPIB</i>          | 64453853 | rs12916806  | 0.9881 | 64242770 | C | A | 0.51 | 4.64E-06 | 2.22E-02 | 7.91E-02 |
| rs12908891 | Brain_Nucleus_accumbens_basal_ganglia | 15 | <i>TPM1</i>          | 63349472 | rs11071781  | 0.9195 | 64243933 | G | A | 0.49 | 4.75E-06 | 4.89E-02 | 9.27E-02 |
| rs12908891 | Brain_Nucleus_accumbens_basal_ganglia | 15 | <i>USP3-AS1</i>      | 63864970 | rs11071781  | 0.9195 | 64243933 | G | A | 0.49 | 4.75E-06 | 8.63E-03 | 4.16E-02 |
| rs12908891 | Brain_Nucleus_accumbens_basal_ganglia | 15 | <i>SNX22</i>         | 64446798 | rs11071781  | 0.9195 | 64243933 | G | A | 0.49 | 4.75E-06 | 2.13E-02 | 6.07E-02 |
| rs12908891 | Brain_Nucleus_accumbens_basal_ganglia | 15 | <i>PPIB</i>          | 64453853 | rs11071781  | 0.9195 | 64243933 | G | A | 0.49 | 4.75E-06 | 1.37E-02 | 5.00E-02 |
| rs12908891 | Brain_Nucleus_accumbens_basal_ganglia | 15 | <i>RP11-321G12.1</i> | 63705841 | rs1304365   | 0.9881 | 64245946 | A | G | 0.51 | 4.67E-06 | 4.48E-02 | 1.06E-01 |
| rs12908891 | Brain_Nucleus_accumbens_basal_ganglia | 15 | <i>USP3-AS1</i>      | 63864970 | rs1304365   | 0.9881 | 64245946 | A | G | 0.51 | 4.67E-06 | 8.42E-03 | 5.77E-02 |
| rs12908891 | Brain_Nucleus_accumbens_basal_ganglia | 15 | <i>SNX22</i>         | 64446798 | rs1304365   | 0.9881 | 64245946 | A | G | 0.51 | 4.67E-06 | 1.83E-02 | 7.40E-02 |
| rs12908891 | Brain_Nucleus_accumbens_basal_ganglia | 15 | <i>PPIB</i>          | 64453853 | rs1304365   | 0.9881 | 64245946 | A | G | 0.51 | 4.67E-06 | 2.22E-02 | 7.92E-02 |
| rs12908891 | Brain_Nucleus_accumbens_basal_ganglia | 15 | <i>RP11-321G12.1</i> | 63705841 | rs145159458 | 0.9119 | 64252880 | T | C | 0.49 | 1.21E-05 | 3.31E-02 | 8.61E-02 |
| rs12908891 | Brain_Nucleus_accumbens_basal_ganglia | 15 | <i>USP3-AS1</i>      | 63864970 | rs145159458 | 0.9119 | 64252880 | T | C | 0.49 | 1.21E-05 | 1.25E-02 | 5.86E-02 |



|            |                                       |    |                      |          |             |        |          |   |   |      |          |          |          |
|------------|---------------------------------------|----|----------------------|----------|-------------|--------|----------|---|---|------|----------|----------|----------|
| rs12908891 | Brain_Nucleus_accumbens_basal_ganglia | 15 | <i>SNX22</i>         | 64446798 | rs145159458 | 0.9119 | 64252880 | T | C | 0.49 | 1.21E-05 | 2.03E-02 | 7.01E-02 |
| rs12908891 | Brain_Nucleus_accumbens_basal_ganglia | 15 | <i>PPIB</i>          | 64453853 | rs145159458 | 0.9119 | 64252880 | T | C | 0.49 | 1.21E-05 | 1.67E-02 | 6.51E-02 |
| rs12908891 | Brain_Nucleus_accumbens_basal_ganglia | 15 | <i>RP11-321G12.1</i> | 63705841 | rs4776692   | 0.9881 | 64255083 | G | A | 0.50 | 1.06E-05 | 4.48E-02 | 1.15E-01 |
| rs12908891 | Brain_Nucleus_accumbens_basal_ganglia | 15 | <i>USP3-AS1</i>      | 63864970 | rs4776692   | 0.9881 | 64255083 | G | A | 0.50 | 1.06E-05 | 8.42E-03 | 6.68E-02 |
| rs12908891 | Brain_Nucleus_accumbens_basal_ganglia | 15 | <i>SNX22</i>         | 64446798 | rs4776692   | 0.9881 | 64255083 | G | A | 0.50 | 1.06E-05 | 1.83E-02 | 8.32E-02 |
| rs12908891 | Brain_Nucleus_accumbens_basal_ganglia | 15 | <i>PPIB</i>          | 64453853 | rs4776692   | 0.9881 | 64255083 | G | A | 0.50 | 1.06E-05 | 2.22E-02 | 8.85E-02 |
| rs12908891 | Brain_Nucleus_accumbens_basal_ganglia | 15 | <i>USP3-AS1</i>      | 63864970 | rs28822416  | 0.8420 | 64257845 | C | T | 0.45 | 1.54E-05 | 4.76E-02 | 7.55E-02 |
| rs12908891 | Brain_Nucleus_accumbens_basal_ganglia | 15 | <i>USP3-AS1</i>      | 63864970 | rs8035776   | 0.8420 | 64258018 | G | A | 0.45 | 1.54E-05 | 4.76E-02 | 7.55E-02 |
| rs12908891 | Brain_Nucleus_accumbens_basal_ganglia | 15 | <i>USP3-AS1</i>      | 63864970 | rs6494456   | 0.8381 | 64258260 | C | T | 0.45 | 1.54E-05 | 4.76E-02 | 7.55E-02 |
| rs12908891 | Brain_Nucleus_accumbens_basal_ganglia | 15 | <i>PPIB</i>          | 64453853 | rs4776695   | 0.8350 | 64259115 | T | C | 0.46 | 9.12E-06 | 2.97E-02 | 5.26E-02 |
| rs12908891 | Brain_Nucleus_accumbens_basal_ganglia | 15 | <i>AC100830.4</i>    | 64987516 | rs4776695   | 0.8350 | 64259115 | T | C | 0.46 | 9.12E-06 | 4.60E-02 | 7.06E-02 |
| rs12908891 | Brain_Putamen_basal_ganglia           | 15 | <i>TPM1</i>          | 63349472 | rs1460544   | 0.8736 | 64201766 | T | C | 0.51 | 9.06E-04 | 2.76E-02 | 1.45E-01 |
| rs12908891 | Brain_Putamen_basal_ganglia           | 15 | <i>RP11-321G12.1</i> | 63705841 | rs1460544   | 0.8736 | 64201766 | T | C | 0.51 | 9.06E-04 | 2.82E-02 | 1.46E-01 |
| rs12908891 | Brain_Putamen_basal_ganglia           | 15 | <i>SNX22</i>         | 64446798 | rs1460544   | 0.8736 | 64201766 | T | C | 0.51 | 9.06E-04 | 1.21E-02 | 1.24E-01 |
| rs12908891 | Brain_Putamen_basal_ganglia           | 15 | <i>RBPMS2</i>        | 65049938 | rs1460544   | 0.8736 | 64201766 | T | C | 0.51 | 9.06E-04 | 3.87E-02 | 1.57E-01 |
| rs12908891 | Brain_Putamen_basal_ganglia           | 15 | <i>TPM1</i>          | 63349472 | rs1037846   | 0.8696 | 64204870 | G | A | 0.51 | 6.33E-04 | 3.99E-02 | 7.24E-02 |
| rs12908891 | Brain_Putamen_basal_ganglia           | 15 | <i>RP11-321G12.1</i> | 63705841 | rs1037846   | 0.8696 | 64204870 | G | A | 0.51 | 6.33E-04 | 4.24E-02 | 7.51E-02 |
| rs12908891 | Brain_Putamen_basal_ganglia           | 15 | <i>SNX22</i>         | 64446798 | rs1037846   | 0.8696 | 64204870 | G | A | 0.51 | 6.33E-04 | 9.30E-03 | 3.33E-02 |
| rs12908891 | Brain_Putamen_basal_ganglia           | 15 | <i>TPM1</i>          | 63349472 | rs11071773  | 0.8883 | 64206765 | A | G | 0.51 | 8.95E-04 | 2.76E-02 | 1.18E-01 |
| rs12908891 | Brain_Putamen_basal_ganglia           | 15 | <i>RP11-321G12.1</i> | 63705841 | rs11071773  | 0.8883 | 64206765 | A | G | 0.51 | 8.95E-04 | 2.73E-02 | 1.18E-01 |
| rs12908891 | Brain_Putamen_basal_ganglia           | 15 | <i>FBXL22</i>        | 63892089 | rs11071773  | 0.8883 | 64206765 | A | G | 0.51 | 8.95E-04 | 4.27E-02 | 1.35E-01 |
| rs12908891 | Brain_Putamen_basal_ganglia           | 15 | <i>SNX22</i>         | 64446798 | rs11071773  | 0.8883 | 64206765 | A | G | 0.51 | 8.95E-04 | 2.06E-02 | 1.09E-01 |
| rs12908891 | Brain_Putamen_basal_ganglia           | 15 | <i>RBPMS2</i>        | 65049938 | rs11071773  | 0.8883 | 64206765 | A | G | 0.51 | 8.95E-04 | 4.74E-02 | 1.39E-01 |
| rs12908891 | Brain_Putamen_basal_ganglia           | 15 | <i>TPM1</i>          | 63349472 | rs12909081  | 0.8809 | 64208260 | A | C | 0.51 | 1.00E-03 | 2.03E-02 | 1.13E-01 |
| rs12908891 | Brain_Putamen_basal_ganglia           | 15 | <i>RP11-321G12.1</i> | 63705841 | rs12909081  | 0.8809 | 64208260 | A | C | 0.51 | 1.00E-03 | 2.64E-02 | 1.20E-01 |
| rs12908891 | Brain_Putamen_basal_ganglia           | 15 | <i>FBXL22</i>        | 63892089 | rs12909081  | 0.8809 | 64208260 | A | C | 0.51 | 1.00E-03 | 3.80E-02 | 1.33E-01 |
| rs12908891 | Brain_Putamen_basal_ganglia           | 15 | <i>SNX22</i>         | 64446798 | rs12909081  | 0.8809 | 64208260 | A | C | 0.51 | 1.00E-03 | 1.35E-02 | 1.03E-01 |
| rs12908891 | Brain_Putamen_basal_ganglia           | 15 | <i>RBPMS2</i>        | 65049938 | rs12909081  | 0.8809 | 64208260 | A | C | 0.51 | 1.00E-03 | 4.62E-02 | 1.42E-01 |
| rs12908891 | Brain_Putamen_basal_ganglia           | 15 | <i>TPM1</i>          | 63349472 | rs749468    | 0.9493 | 64210279 | T | C | 0.53 | 2.79E-04 | 1.16E-02 | 3.65E-02 |
| rs12908891 | Brain_Putamen_basal_ganglia           | 15 | <i>RP11-321G12.1</i> | 63705841 | rs749468    | 0.9493 | 64210279 | T | C | 0.53 | 2.79E-04 | 2.71E-02 | 5.71E-02 |
| rs12908891 | Brain_Putamen_basal_ganglia           | 15 | <i>FBXL22</i>        | 63892089 | rs749468    | 0.9493 | 64210279 | T | C | 0.53 | 2.79E-04 | 3.12E-02 | 6.20E-02 |
| rs12908891 | Brain_Putamen_basal_ganglia           | 15 | <i>SNX22</i>         | 64446798 | rs749468    | 0.9493 | 64210279 | T | C | 0.53 | 2.79E-04 | 8.85E-03 | 3.20E-02 |
| rs12908891 | Brain_Putamen_basal_ganglia           | 15 | <i>TRIP4</i>         | 64713724 | rs749468    | 0.9493 | 64210279 | T | C | 0.53 | 2.79E-04 | 4.14E-02 | 7.34E-02 |
| rs12908891 | Brain_Putamen_basal_ganglia           | 15 | <i>RBPMS2</i>        | 65049938 | rs749468    | 0.9493 | 64210279 | T | C | 0.53 | 2.79E-04 | 2.95E-02 | 6.00E-02 |
| rs12908891 | Brain_Putamen_basal_ganglia           | 15 | <i>TPM1</i>          | 63349472 | rs2414844   | 0.8846 | 64210675 | A | G | 0.51 | 9.01E-04 | 2.03E-02 | 1.09E-01 |
| rs12908891 | Brain_Putamen_basal_ganglia           | 15 | <i>RP11-321G12.1</i> | 63705841 | rs2414844   | 0.8846 | 64210675 | A | G | 0.51 | 9.01E-04 | 2.64E-02 | 1.17E-01 |
| rs12908891 | Brain_Putamen_basal_ganglia           | 15 | <i>FBXL22</i>        | 63892089 | rs2414844   | 0.8846 | 64210675 | A | G | 0.51 | 9.01E-04 | 3.80E-02 | 1.30E-01 |
| rs12908891 | Brain_Putamen_basal_ganglia           | 15 | <i>SNX22</i>         | 64446798 | rs2414844   | 0.8846 | 64210675 | A | G | 0.51 | 9.01E-04 | 1.35E-02 | 9.95E-02 |
| rs12908891 | Brain_Putamen_basal_ganglia           | 15 | <i>RBPMS2</i>        | 65049938 | rs2414844   | 0.8846 | 64210675 | A | G | 0.51 | 9.01E-04 | 4.62E-02 | 1.39E-01 |
| rs12908891 | Brain_Putamen_basal_ganglia           | 15 | <i>TPM1</i>          | 63349472 | rs12592060  | 0.8846 | 64210780 | T | C | 0.51 | 9.01E-04 | 2.03E-02 | 1.09E-01 |

|            |                             |    |                      |          |            |        |          |   |   |      |          |          |          |
|------------|-----------------------------|----|----------------------|----------|------------|--------|----------|---|---|------|----------|----------|----------|
| rs12908891 | Brain_Putamen_basal_ganglia | 15 | <i>RP11-321G12.1</i> | 63705841 | rs12592060 | 0.8846 | 64210780 | T | C | 0.51 | 9.01E-04 | 2.64E-02 | 1.17E-01 |
| rs12908891 | Brain_Putamen_basal_ganglia | 15 | <i>FBXL22</i>        | 63892089 | rs12592060 | 0.8846 | 64210780 | T | C | 0.51 | 9.01E-04 | 3.80E-02 | 1.30E-01 |
| rs12908891 | Brain_Putamen_basal_ganglia | 15 | <i>SNX22</i>         | 64446798 | rs12592060 | 0.8846 | 64210780 | T | C | 0.51 | 9.01E-04 | 1.35E-02 | 9.95E-02 |
| rs12908891 | Brain_Putamen_basal_ganglia | 15 | <i>RBPMS2</i>        | 65049938 | rs12592060 | 0.8846 | 64210780 | T | C | 0.51 | 9.01E-04 | 4.62E-02 | 1.39E-01 |
| rs12908891 | Brain_Putamen_basal_ganglia | 15 | <i>TPM1</i>          | 63349472 | rs1471282  | 0.8846 | 64212275 | G | T | 0.51 | 1.07E-03 | 2.03E-02 | 1.16E-01 |
| rs12908891 | Brain_Putamen_basal_ganglia | 15 | <i>RP11-321G12.1</i> | 63705841 | rs1471282  | 0.8846 | 64212275 | G | T | 0.51 | 1.07E-03 | 2.64E-02 | 1.24E-01 |
| rs12908891 | Brain_Putamen_basal_ganglia | 15 | <i>FBXL22</i>        | 63892089 | rs1471282  | 0.8846 | 64212275 | G | T | 0.51 | 1.07E-03 | 3.80E-02 | 1.37E-01 |
| rs12908891 | Brain_Putamen_basal_ganglia | 15 | <i>SNX22</i>         | 64446798 | rs1471282  | 0.8846 | 64212275 | G | T | 0.51 | 1.07E-03 | 1.35E-02 | 1.06E-01 |
| rs12908891 | Brain_Putamen_basal_ganglia | 15 | <i>RBPMS2</i>        | 65049938 | rs1471282  | 0.8846 | 64212275 | G | T | 0.51 | 1.07E-03 | 4.62E-02 | 1.45E-01 |
| rs12908891 | Brain_Putamen_basal_ganglia | 15 | <i>TPM1</i>          | 63349472 | rs11635779 | 0.8808 | 64213826 | T | C | 0.50 | 6.34E-05 | 1.03E-02 | 4.33E-02 |
| rs12908891 | Brain_Putamen_basal_ganglia | 15 | <i>RP11-321G12.1</i> | 63705841 | rs11635779 | 0.8808 | 64213826 | T | C | 0.50 | 6.34E-05 | 2.76E-02 | 6.74E-02 |
| rs12908891 | Brain_Putamen_basal_ganglia | 15 | <i>FBXL22</i>        | 63892089 | rs11635779 | 0.8808 | 64213826 | T | C | 0.50 | 6.34E-05 | 3.34E-02 | 7.42E-02 |
| rs12908891 | Brain_Putamen_basal_ganglia | 15 | <i>SNX22</i>         | 64446798 | rs11635779 | 0.8808 | 64213826 | T | C | 0.50 | 6.34E-05 | 9.93E-03 | 4.26E-02 |
| rs12908891 | Brain_Putamen_basal_ganglia | 15 | <i>RBPMS2</i>        | 65049938 | rs11635779 | 0.8808 | 64213826 | T | C | 0.50 | 6.34E-05 | 4.76E-02 | 8.99E-02 |
| rs12908891 | Brain_Putamen_basal_ganglia | 15 | <i>TPM1</i>          | 63349472 | rs12904374 | 0.8808 | 64214670 | T | A | 0.51 | 8.63E-04 | 1.43E-02 | 4.36E-02 |
| rs12908891 | Brain_Putamen_basal_ganglia | 15 | <i>RP11-321G12.1</i> | 63705841 | rs12904374 | 0.8808 | 64214670 | T | A | 0.51 | 8.63E-04 | 2.81E-02 | 6.15E-02 |
| rs12908891 | Brain_Putamen_basal_ganglia | 15 | <i>FBXL22</i>        | 63892089 | rs12904374 | 0.8808 | 64214670 | T | A | 0.51 | 8.63E-04 | 3.71E-02 | 7.20E-02 |
| rs12908891 | Brain_Putamen_basal_ganglia | 15 | <i>SNX22</i>         | 64446798 | rs12904374 | 0.8808 | 64214670 | T | A | 0.51 | 8.63E-04 | 1.52E-02 | 4.48E-02 |
| rs12908891 | Brain_Putamen_basal_ganglia | 15 | <i>RBPMS2</i>        | 65049938 | rs12904374 | 0.8808 | 64214670 | T | A | 0.51 | 8.63E-04 | 4.82E-02 | 8.40E-02 |
| rs12908891 | Brain_Putamen_basal_ganglia | 15 | <i>TPM1</i>          | 63349472 | rs920762   | 0.9379 | 64214954 | C | G | 0.47 | 1.24E-05 | 2.80E-02 | 4.71E-02 |
| rs12908891 | Brain_Putamen_basal_ganglia | 15 | <i>FBXL22</i>        | 63892089 | rs920762   | 0.9379 | 64214954 | C | G | 0.47 | 1.24E-05 | 3.53E-02 | 5.52E-02 |
| rs12908891 | Brain_Putamen_basal_ganglia | 15 | <i>SNX22</i>         | 64446798 | rs920762   | 0.9379 | 64214954 | C | G | 0.47 | 1.24E-05 | 7.09E-03 | 1.99E-02 |
| rs12908891 | Brain_Putamen_basal_ganglia | 15 | <i>TRIP4</i>         | 64713724 | rs920762   | 0.9379 | 64214954 | C | G | 0.47 | 1.24E-05 | 4.06E-02 | 6.11E-02 |
| rs12908891 | Brain_Putamen_basal_ganglia | 15 | <i>RBPMS2</i>        | 65049938 | rs920762   | 0.9379 | 64214954 | C | G | 0.47 | 1.24E-05 | 4.98E-02 | 7.08E-02 |
| rs12908891 | Brain_Putamen_basal_ganglia | 15 | <i>TPM1</i>          | 63349472 | rs11853632 | 0.8921 | 64217845 | C | G | 0.50 | 4.21E-05 | 2.03E-02 | 5.51E-02 |
| rs12908891 | Brain_Putamen_basal_ganglia | 15 | <i>RP11-321G12.1</i> | 63705841 | rs11853632 | 0.8921 | 64217845 | C | G | 0.50 | 4.21E-05 | 2.64E-02 | 6.29E-02 |
| rs12908891 | Brain_Putamen_basal_ganglia | 15 | <i>FBXL22</i>        | 63892089 | rs11853632 | 0.8921 | 64217845 | C | G | 0.50 | 4.21E-05 | 3.80E-02 | 7.64E-02 |
| rs12908891 | Brain_Putamen_basal_ganglia | 15 | <i>SNX22</i>         | 64446798 | rs11853632 | 0.8921 | 64217845 | C | G | 0.50 | 4.21E-05 | 1.35E-02 | 4.55E-02 |
| rs12908891 | Brain_Putamen_basal_ganglia | 15 | <i>RBPMS2</i>        | 65049938 | rs11853632 | 0.8921 | 64217845 | C | G | 0.50 | 4.21E-05 | 4.62E-02 | 8.53E-02 |
| rs12908891 | Brain_Putamen_basal_ganglia | 15 | <i>TPM1</i>          | 63349472 | rs12907405 | 0.8884 | 64220046 | T | C | 0.50 | 4.35E-05 | 2.58E-02 | 6.23E-02 |
| rs12908891 | Brain_Putamen_basal_ganglia | 15 | <i>RP11-321G12.1</i> | 63705841 | rs12907405 | 0.8884 | 64220046 | T | C | 0.50 | 4.35E-05 | 1.15E-02 | 4.26E-02 |
| rs12908891 | Brain_Putamen_basal_ganglia | 15 | <i>FBXL22</i>        | 63892089 | rs12907405 | 0.8884 | 64220046 | T | C | 0.50 | 4.35E-05 | 3.59E-02 | 7.42E-02 |
| rs12908891 | Brain_Putamen_basal_ganglia | 15 | <i>SNX22</i>         | 64446798 | rs12907405 | 0.8884 | 64220046 | T | C | 0.50 | 4.35E-05 | 1.07E-02 | 4.13E-02 |
| rs12908891 | Brain_Putamen_basal_ganglia | 15 | <i>TPM1</i>          | 63349472 | rs11071775 | 0.8808 | 64220995 | A | G | 0.50 | 4.81E-05 | 1.41E-02 | 4.68E-02 |
| rs12908891 | Brain_Putamen_basal_ganglia | 15 | <i>RP11-321G12.1</i> | 63705841 | rs11071775 | 0.8808 | 64220995 | A | G | 0.50 | 4.81E-05 | 1.61E-02 | 4.96E-02 |
| rs12908891 | Brain_Putamen_basal_ganglia | 15 | <i>FBXL22</i>        | 63892089 | rs11071775 | 0.8808 | 64220995 | A | G | 0.50 | 4.81E-05 | 4.65E-02 | 8.59E-02 |
| rs12908891 | Brain_Putamen_basal_ganglia | 15 | <i>SNX22</i>         | 64446798 | rs11071775 | 0.8808 | 64220995 | A | G | 0.50 | 4.81E-05 | 1.35E-02 | 4.59E-02 |
| rs12908891 | Brain_Putamen_basal_ganglia | 15 | <i>TRIP4</i>         | 64713724 | rs11071775 | 0.8808 | 64220995 | A | G | 0.50 | 4.81E-05 | 3.88E-02 | 7.76E-02 |
| rs12908891 | Brain_Putamen_basal_ganglia | 15 | <i>TPM1</i>          | 63349472 | rs11071776 | 0.8808 | 64221010 | T | A | 0.50 | 5.49E-05 | 1.41E-02 | 4.77E-02 |
| rs12908891 | Brain_Putamen_basal_ganglia | 15 | <i>RP11-321G12.1</i> | 63705841 | rs11071776 | 0.8808 | 64221010 | T | A | 0.50 | 5.49E-05 | 1.61E-02 | 5.05E-02 |

|            |                             |    |                      |          |            |        |          |   |   |      |          |          |          |
|------------|-----------------------------|----|----------------------|----------|------------|--------|----------|---|---|------|----------|----------|----------|
| rs12908891 | Brain_Putamen_basal_ganglia | 15 | <i>FBXL22</i>        | 63892089 | rs11071776 | 0.8808 | 64221010 | T | A | 0.50 | 5.49E-05 | 4.65E-02 | 8.69E-02 |
| rs12908891 | Brain_Putamen_basal_ganglia | 15 | <i>SNX22</i>         | 64446798 | rs11071776 | 0.8808 | 64221010 | T | A | 0.50 | 5.49E-05 | 1.35E-02 | 4.68E-02 |
| rs12908891 | Brain_Putamen_basal_ganglia | 15 | <i>TRIP4</i>         | 64713724 | rs11071776 | 0.8808 | 64221010 | T | A | 0.50 | 5.49E-05 | 3.88E-02 | 7.86E-02 |
| rs12908891 | Brain_Putamen_basal_ganglia | 15 | <i>TPM1</i>          | 63349472 | rs11637858 | 0.8959 | 64224107 | C | T | 0.49 | 4.60E-05 | 1.28E-02 | 4.43E-02 |
| rs12908891 | Brain_Putamen_basal_ganglia | 15 | <i>RP11-321G12.1</i> | 63705841 | rs11637858 | 0.8959 | 64224107 | C | T | 0.49 | 4.60E-05 | 1.84E-02 | 5.24E-02 |
| rs12908891 | Brain_Putamen_basal_ganglia | 15 | <i>SNX22</i>         | 64446798 | rs11637858 | 0.8959 | 64224107 | C | T | 0.49 | 4.60E-05 | 1.06E-02 | 4.08E-02 |
| rs12908891 | Brain_Putamen_basal_ganglia | 15 | <i>TRIP4</i>         | 64713724 | rs11637858 | 0.8959 | 64224107 | C | T | 0.49 | 4.60E-05 | 3.43E-02 | 7.21E-02 |
| rs12908891 | Brain_Putamen_basal_ganglia | 15 | <i>RBPMS2</i>        | 65049938 | rs11637858 | 0.8959 | 64224107 | C | T | 0.49 | 4.60E-05 | 4.73E-02 | 8.65E-02 |
| rs12908891 | Brain_Putamen_basal_ganglia | 15 | <i>TPM1</i>          | 63349472 | rs12916395 | 0.9921 | 64225563 | T | C | 0.51 | 1.86E-06 | 2.99E-02 | 4.68E-02 |
| rs12908891 | Brain_Putamen_basal_ganglia | 15 | <i>SNX22</i>         | 64446798 | rs12916395 | 0.9921 | 64225563 | T | C | 0.51 | 1.86E-06 | 6.00E-03 | 1.63E-02 |
| rs12908891 | Brain_Putamen_basal_ganglia | 15 | <i>TRIP4</i>         | 64713724 | rs12916395 | 0.9921 | 64225563 | T | C | 0.51 | 1.86E-06 | 2.14E-02 | 3.70E-02 |
| rs12908891 | Brain_Putamen_basal_ganglia | 15 | <i>TPM1</i>          | 63349472 | rs11630587 | 0.9921 | 64225908 | C | T | 0.51 | 1.77E-06 | 1.39E-02 | 2.76E-02 |
| rs12908891 | Brain_Putamen_basal_ganglia | 15 | <i>RPS27L</i>        | 63434145 | rs11630587 | 0.9921 | 64225908 | C | T | 0.51 | 1.77E-06 | 4.31E-02 | 6.10E-02 |
| rs12908891 | Brain_Putamen_basal_ganglia | 15 | <i>SNX22</i>         | 64446798 | rs11630587 | 0.9921 | 64225908 | C | T | 0.51 | 1.77E-06 | 6.52E-03 | 1.71E-02 |
| rs12908891 | Brain_Putamen_basal_ganglia | 15 | <i>TRIP4</i>         | 64713724 | rs11630587 | 0.9921 | 64225908 | C | T | 0.51 | 1.77E-06 | 1.28E-02 | 2.62E-02 |
| rs12908891 | Brain_Putamen_basal_ganglia | 15 | <i>TPM1</i>          | 63349472 | rs4776677  | 0.9921 | 64227044 | C | T | 0.51 | 1.54E-06 | 2.91E-02 | 4.57E-02 |
| rs12908891 | Brain_Putamen_basal_ganglia | 15 | <i>RPS27L</i>        | 63434145 | rs4776677  | 0.9921 | 64227044 | C | T | 0.51 | 1.54E-06 | 4.39E-02 | 6.18E-02 |
| rs12908891 | Brain_Putamen_basal_ganglia | 15 | <i>CA12</i>          | 63643968 | rs4776677  | 0.9921 | 64227044 | C | T | 0.51 | 1.54E-06 | 3.63E-02 | 5.36E-02 |
| rs12908891 | Brain_Putamen_basal_ganglia | 15 | <i>SNX22</i>         | 64446798 | rs4776677  | 0.9921 | 64227044 | C | T | 0.51 | 1.54E-06 | 3.73E-03 | 1.22E-02 |
| rs12908891 | Brain_Putamen_basal_ganglia | 15 | <i>TRIP4</i>         | 64713724 | rs4776677  | 0.9921 | 64227044 | C | T | 0.51 | 1.54E-06 | 2.87E-02 | 4.52E-02 |
| rs12908891 | Brain_Putamen_basal_ganglia | 15 | <i>CA12</i>          | 63643968 | rs11071777 | 0.8557 | 64229285 | C | G | 0.55 | 9.20E-06 | 2.02E-02 | 3.79E-02 |
| rs12908891 | Brain_Putamen_basal_ganglia | 15 | <i>RP11-321G12.1</i> | 63705841 | rs11071777 | 0.8557 | 64229285 | C | G | 0.55 | 9.20E-06 | 2.20E-02 | 4.01E-02 |
| rs12908891 | Brain_Putamen_basal_ganglia | 15 | <i>SNX22</i>         | 64446798 | rs11071777 | 0.8557 | 64229285 | C | G | 0.55 | 9.20E-06 | 1.11E-03 | 7.68E-03 |
| rs12908891 | Brain_Putamen_basal_ganglia | 15 | <i>TPM1</i>          | 63349472 | rs1563886  | 0.9272 | 64230852 | G | C | 0.49 | 8.06E-06 | 1.11E-02 | 4.45E-02 |
| rs12908891 | Brain_Putamen_basal_ganglia | 15 | <i>RP11-321G12.1</i> | 63705841 | rs1563886  | 0.9272 | 64230852 | G | C | 0.49 | 8.06E-06 | 1.14E-02 | 4.50E-02 |
| rs12908891 | Brain_Putamen_basal_ganglia | 15 | <i>SNX22</i>         | 64446798 | rs1563886  | 0.9272 | 64230852 | G | C | 0.49 | 8.06E-06 | 1.10E-02 | 4.43E-02 |
| rs12908891 | Brain_Putamen_basal_ganglia | 15 | <i>TRIP4</i>         | 64713724 | rs1563886  | 0.9272 | 64230852 | G | C | 0.49 | 8.06E-06 | 3.50E-02 | 7.60E-02 |
| rs12908891 | Brain_Putamen_basal_ganglia | 15 | <i>RBPMS2</i>        | 65049938 | rs1563886  | 0.9272 | 64230852 | G | C | 0.49 | 8.06E-06 | 3.68E-02 | 7.81E-02 |
| rs12908891 | Brain_Putamen_basal_ganglia | 15 | <i>TPM1</i>          | 63349472 | rs10744961 | 0.9960 | 64230930 | A | G | 0.51 | 1.86E-06 | 2.99E-02 | 4.72E-02 |
| rs12908891 | Brain_Putamen_basal_ganglia | 15 | <i>SNX22</i>         | 64446798 | rs10744961 | 0.9960 | 64230930 | A | G | 0.51 | 1.86E-06 | 6.00E-03 | 1.66E-02 |
| rs12908891 | Brain_Putamen_basal_ganglia | 15 | <i>TRIP4</i>         | 64713724 | rs10744961 | 0.9960 | 64230930 | A | G | 0.51 | 1.86E-06 | 2.14E-02 | 3.73E-02 |
| rs12908891 | Brain_Putamen_basal_ganglia | 15 | <i>LACTB</i>         | 63424129 | rs6494454  | 0.8031 | 64233563 | A | C | 0.56 | 2.52E-05 | 3.81E-02 | 6.25E-02 |
| rs12908891 | Brain_Putamen_basal_ganglia | 15 | <i>CA12</i>          | 63643968 | rs6494454  | 0.8031 | 64233563 | A | C | 0.56 | 2.52E-05 | 3.58E-02 | 6.00E-02 |
| rs12908891 | Brain_Putamen_basal_ganglia | 15 | <i>TRIP4</i>         | 64713724 | rs6494454  | 0.8031 | 64233563 | A | C | 0.56 | 2.52E-05 | 2.32E-02 | 4.54E-02 |
| rs12908891 | Brain_Putamen_basal_ganglia | 15 | <i>RBPMS2</i>        | 65049938 | rs6494454  | 0.8031 | 64233563 | A | C | 0.56 | 2.52E-05 | 4.31E-02 | 6.80E-02 |
| rs12908891 | Brain_Putamen_basal_ganglia | 15 | <i>LACTB</i>         | 63424129 | rs894660   | 0.8031 | 64234334 | C | T | 0.56 | 2.52E-05 | 3.81E-02 | 6.25E-02 |
| rs12908891 | Brain_Putamen_basal_ganglia | 15 | <i>CA12</i>          | 63643968 | rs894660   | 0.8031 | 64234334 | C | T | 0.56 | 2.52E-05 | 3.58E-02 | 6.00E-02 |
| rs12908891 | Brain_Putamen_basal_ganglia | 15 | <i>TRIP4</i>         | 64713724 | rs894660   | 0.8031 | 64234334 | C | T | 0.56 | 2.52E-05 | 2.32E-02 | 4.54E-02 |
| rs12908891 | Brain_Putamen_basal_ganglia | 15 | <i>RBPMS2</i>        | 65049938 | rs894660   | 0.8031 | 64234334 | C | T | 0.56 | 2.52E-05 | 4.31E-02 | 6.80E-02 |
| rs12908891 | Brain_Putamen_basal_ganglia | 15 | <i>LACTB</i>         | 63424129 | rs4776266  | 0.8031 | 64236175 | G | T | 0.56 | 2.23E-05 | 3.75E-02 | 6.17E-02 |

|            |                             |    |               |          |            |        |          |   |   |      |          |          |          |
|------------|-----------------------------|----|---------------|----------|------------|--------|----------|---|---|------|----------|----------|----------|
| rs12908891 | Brain_Putamen_basal_ganglia | 15 | CA12          | 63643968 | rs4776266  | 0.8031 | 64236175 | G | T | 0.56 | 2.23E-05 | 2.70E-02 | 4.97E-02 |
| rs12908891 | Brain_Putamen_basal_ganglia | 15 | TRIP4         | 64713724 | rs4776266  | 0.8031 | 64236175 | G | T | 0.56 | 2.23E-05 | 2.88E-02 | 5.19E-02 |
| rs12908891 | Brain_Putamen_basal_ganglia | 15 | TPM1          | 63349472 | rs4776268  | 1.0000 | 64236398 | A | G | 0.51 | 6.19E-06 | 1.27E-02 | 6.27E-02 |
| rs12908891 | Brain_Putamen_basal_ganglia | 15 | RP11-321G12.1 | 63705841 | rs4776268  | 1.0000 | 64236398 | A | G | 0.51 | 6.19E-06 | 2.35E-02 | 7.83E-02 |
| rs12908891 | Brain_Putamen_basal_ganglia | 15 | SNX22         | 64446798 | rs4776268  | 1.0000 | 64236398 | A | G | 0.51 | 6.19E-06 | 7.91E-03 | 5.41E-02 |
| rs12908891 | Brain_Putamen_basal_ganglia | 15 | TRIP4         | 64713724 | rs4776268  | 1.0000 | 64236398 | A | G | 0.51 | 6.19E-06 | 2.33E-02 | 7.81E-02 |
| rs12908891 | Brain_Putamen_basal_ganglia | 15 | RBPMS2        | 65049938 | rs4776268  | 1.0000 | 64236398 | A | G | 0.51 | 6.19E-06 | 3.98E-02 | 9.76E-02 |
| rs12908891 | Brain_Putamen_basal_ganglia | 15 | TPM1          | 63349472 | rs12908891 | 1.0000 | 64236441 | A | G | 0.52 | 1.39E-06 | 3.55E-02 | 5.29E-02 |
| rs12908891 | Brain_Putamen_basal_ganglia | 15 | SNX22         | 64446798 | rs12908891 | 1.0000 | 64236441 | A | G | 0.52 | 1.39E-06 | 4.62E-03 | 1.39E-02 |
| rs12908891 | Brain_Putamen_basal_ganglia | 15 | TRIP4         | 64713724 | rs12908891 | 1.0000 | 64236441 | A | G | 0.52 | 1.39E-06 | 2.45E-02 | 4.06E-02 |
| rs12908891 | Brain_Putamen_basal_ganglia | 15 | RBPMS2        | 65049938 | rs12908891 | 1.0000 | 64236441 | A | G | 0.52 | 1.39E-06 | 4.15E-02 | 5.94E-02 |
| rs12908891 | Brain_Putamen_basal_ganglia | 15 | TPM1          | 63349472 | rs11071779 | 0.9881 | 64239044 | G | A | 0.51 | 1.57E-06 | 2.43E-02 | 4.09E-02 |
| rs12908891 | Brain_Putamen_basal_ganglia | 15 | CA12          | 63643968 | rs11071779 | 0.9881 | 64239044 | G | A | 0.51 | 1.57E-06 | 3.68E-02 | 5.50E-02 |
| rs12908891 | Brain_Putamen_basal_ganglia | 15 | RP11-321G12.1 | 63705841 | rs11071779 | 0.9881 | 64239044 | G | A | 0.51 | 1.57E-06 | 3.48E-02 | 5.28E-02 |
| rs12908891 | Brain_Putamen_basal_ganglia | 15 | FBXL22        | 63892089 | rs11071779 | 0.9881 | 64239044 | G | A | 0.51 | 1.57E-06 | 4.28E-02 | 6.14E-02 |
| rs12908891 | Brain_Putamen_basal_ganglia | 15 | SNX22         | 64446798 | rs11071779 | 0.9881 | 64239044 | G | A | 0.51 | 1.57E-06 | 4.08E-03 | 1.34E-02 |
| rs12908891 | Brain_Putamen_basal_ganglia | 15 | TRIP4         | 64713724 | rs11071779 | 0.9881 | 64239044 | G | A | 0.51 | 1.57E-06 | 1.90E-02 | 3.45E-02 |
| rs12908891 | Brain_Putamen_basal_ganglia | 15 | TPM1          | 63349472 | rs11071780 | 0.9842 | 64241691 | A | G | 0.51 | 4.74E-06 | 2.32E-02 | 8.06E-02 |
| rs12908891 | Brain_Putamen_basal_ganglia | 15 | CA12          | 63643968 | rs11071780 | 0.9842 | 64241691 | A | G | 0.51 | 4.74E-06 | 4.42E-02 | 1.05E-01 |
| rs12908891 | Brain_Putamen_basal_ganglia | 15 | RP11-321G12.1 | 63705841 | rs11071780 | 0.9842 | 64241691 | A | G | 0.51 | 4.74E-06 | 1.88E-02 | 7.46E-02 |
| rs12908891 | Brain_Putamen_basal_ganglia | 15 | SNX22         | 64446798 | rs11071780 | 0.9842 | 64241691 | A | G | 0.51 | 4.74E-06 | 4.52E-03 | 4.87E-02 |
| rs12908891 | Brain_Putamen_basal_ganglia | 15 | TRIP4         | 64713724 | rs11071780 | 0.9842 | 64241691 | A | G | 0.51 | 4.74E-06 | 2.65E-02 | 8.47E-02 |
| rs12908891 | Brain_Putamen_basal_ganglia | 15 | RBPMS2        | 65049938 | rs11071780 | 0.9842 | 64241691 | A | G | 0.51 | 4.74E-06 | 4.95E-02 | 1.10E-01 |
| rs12908891 | Brain_Putamen_basal_ganglia | 15 | TPM1          | 63349472 | rs11854537 | 0.9842 | 64241733 | A | G | 0.51 | 4.74E-06 | 2.32E-02 | 8.06E-02 |
| rs12908891 | Brain_Putamen_basal_ganglia | 15 | CA12          | 63643968 | rs11854537 | 0.9842 | 64241733 | A | G | 0.51 | 4.74E-06 | 4.42E-02 | 1.05E-01 |
| rs12908891 | Brain_Putamen_basal_ganglia | 15 | RP11-321G12.1 | 63705841 | rs11854537 | 0.9842 | 64241733 | A | G | 0.51 | 4.74E-06 | 1.88E-02 | 7.46E-02 |
| rs12908891 | Brain_Putamen_basal_ganglia | 15 | SNX22         | 64446798 | rs11854537 | 0.9842 | 64241733 | A | G | 0.51 | 4.74E-06 | 4.52E-03 | 4.87E-02 |
| rs12908891 | Brain_Putamen_basal_ganglia | 15 | TRIP4         | 64713724 | rs11854537 | 0.9842 | 64241733 | A | G | 0.51 | 4.74E-06 | 2.65E-02 | 8.47E-02 |
| rs12908891 | Brain_Putamen_basal_ganglia | 15 | RBPMS2        | 65049938 | rs11854537 | 0.9842 | 64241733 | A | G | 0.51 | 4.74E-06 | 4.95E-02 | 1.10E-01 |
| rs12908891 | Brain_Putamen_basal_ganglia | 15 | TPM1          | 63349472 | rs1380844  | 0.9881 | 64242007 | G | T | 0.51 | 4.74E-06 | 2.32E-02 | 8.06E-02 |
| rs12908891 | Brain_Putamen_basal_ganglia | 15 | CA12          | 63643968 | rs1380844  | 0.9881 | 64242007 | G | T | 0.51 | 4.74E-06 | 4.42E-02 | 1.05E-01 |
| rs12908891 | Brain_Putamen_basal_ganglia | 15 | RP11-321G12.1 | 63705841 | rs1380844  | 0.9881 | 64242007 | G | T | 0.51 | 4.74E-06 | 1.88E-02 | 7.46E-02 |
| rs12908891 | Brain_Putamen_basal_ganglia | 15 | SNX22         | 64446798 | rs1380844  | 0.9881 | 64242007 | G | T | 0.51 | 4.74E-06 | 4.52E-03 | 4.87E-02 |
| rs12908891 | Brain_Putamen_basal_ganglia | 15 | TRIP4         | 64713724 | rs1380844  | 0.9881 | 64242007 | G | T | 0.51 | 4.74E-06 | 2.65E-02 | 8.47E-02 |
| rs12908891 | Brain_Putamen_basal_ganglia | 15 | RBPMS2        | 65049938 | rs1380844  | 0.9881 | 64242007 | G | T | 0.51 | 4.74E-06 | 4.95E-02 | 1.10E-01 |
| rs12908891 | Brain_Putamen_basal_ganglia | 15 | TPM1          | 63349472 | rs12916806 | 0.9881 | 64242770 | C | A | 0.51 | 4.64E-06 | 2.32E-02 | 8.05E-02 |
| rs12908891 | Brain_Putamen_basal_ganglia | 15 | CA12          | 63643968 | rs12916806 | 0.9881 | 64242770 | C | A | 0.51 | 4.64E-06 | 4.42E-02 | 1.05E-01 |
| rs12908891 | Brain_Putamen_basal_ganglia | 15 | RP11-321G12.1 | 63705841 | rs12916806 | 0.9881 | 64242770 | C | A | 0.51 | 4.64E-06 | 1.88E-02 | 7.45E-02 |
| rs12908891 | Brain_Putamen_basal_ganglia | 15 | SNX22         | 64446798 | rs12916806 | 0.9881 | 64242770 | C | A | 0.51 | 4.64E-06 | 4.52E-03 | 4.87E-02 |
| rs12908891 | Brain_Putamen_basal_ganglia | 15 | TRIP4         | 64713724 | rs12916806 | 0.9881 | 64242770 | C | A | 0.51 | 4.64E-06 | 2.65E-02 | 8.47E-02 |

|            |                             |    |                      |          |            |        |          |   |   |      |          |          |          |
|------------|-----------------------------|----|----------------------|----------|------------|--------|----------|---|---|------|----------|----------|----------|
| rs12908891 | Brain_Putamen_basal_ganglia | 15 | <i>RBPMS2</i>        | 65049938 | rs12916806 | 0.9881 | 64242770 | C | A | 0.51 | 4.64E-06 | 4.95E-02 | 1.10E-01 |
| rs12908891 | Brain_Putamen_basal_ganglia | 15 | <i>TPM1</i>          | 63349472 | rs11071781 | 0.9195 | 64243933 | G | A | 0.49 | 4.75E-06 | 2.11E-02 | 6.05E-02 |
| rs12908891 | Brain_Putamen_basal_ganglia | 15 | <i>RPS27L</i>        | 63434145 | rs11071781 | 0.9195 | 64243933 | G | A | 0.49 | 4.75E-06 | 4.41E-02 | 8.75E-02 |
| rs12908891 | Brain_Putamen_basal_ganglia | 15 | <i>RP11-321G12.1</i> | 63705841 | rs11071781 | 0.9195 | 64243933 | G | A | 0.49 | 4.75E-06 | 1.89E-02 | 5.76E-02 |
| rs12908891 | Brain_Putamen_basal_ganglia | 15 | <i>SNX22</i>         | 64446798 | rs11071781 | 0.9195 | 64243933 | G | A | 0.49 | 4.75E-06 | 4.99E-03 | 3.41E-02 |
| rs12908891 | Brain_Putamen_basal_ganglia | 15 | <i>TRIP4</i>         | 64713724 | rs11071781 | 0.9195 | 64243933 | G | A | 0.49 | 4.75E-06 | 3.24E-02 | 7.45E-02 |
| rs12908891 | Brain_Putamen_basal_ganglia | 15 | <i>TPM1</i>          | 63349472 | rs1304365  | 0.9881 | 64245946 | A | G | 0.51 | 4.67E-06 | 2.00E-02 | 7.62E-02 |
| rs12908891 | Brain_Putamen_basal_ganglia | 15 | <i>CA12</i>          | 63643968 | rs1304365  | 0.9881 | 64245946 | A | G | 0.51 | 4.67E-06 | 4.61E-02 | 1.07E-01 |
| rs12908891 | Brain_Putamen_basal_ganglia | 15 | <i>RP11-321G12.1</i> | 63705841 | rs1304365  | 0.9881 | 64245946 | A | G | 0.51 | 4.67E-06 | 2.34E-02 | 8.08E-02 |
| rs12908891 | Brain_Putamen_basal_ganglia | 15 | <i>SNX22</i>         | 64446798 | rs1304365  | 0.9881 | 64245946 | A | G | 0.51 | 4.67E-06 | 3.58E-03 | 4.61E-02 |
| rs12908891 | Brain_Putamen_basal_ganglia | 15 | <i>TRIP4</i>         | 64713724 | rs1304365  | 0.9881 | 64245946 | A | G | 0.51 | 4.67E-06 | 2.15E-02 | 7.83E-02 |
| rs12908891 | Brain_Putamen_basal_ganglia | 15 | <i>TPM1</i>          | 63349472 | s115415409 | 0.8420 | 64249559 | T | C | 0.45 | 1.45E-05 | 4.25E-02 | 6.98E-02 |
| rs12908891 | Brain_Putamen_basal_ganglia | 15 | <i>RP11-321G12.1</i> | 63705841 | s115415409 | 0.8420 | 64249559 | T | C | 0.45 | 1.45E-05 | 1.66E-02 | 3.93E-02 |
| rs12908891 | Brain_Putamen_basal_ganglia | 15 | <i>SNX22</i>         | 64446798 | s115415409 | 0.8420 | 64249559 | T | C | 0.45 | 1.45E-05 | 2.74E-02 | 5.28E-02 |
| rs12908891 | Brain_Putamen_basal_ganglia | 15 | <i>TPM1</i>          | 63349472 | s145159458 | 0.9119 | 64252880 | T | C | 0.49 | 1.21E-05 | 1.79E-02 | 6.68E-02 |
| rs12908891 | Brain_Putamen_basal_ganglia | 15 | <i>CA12</i>          | 63643968 | s145159458 | 0.9119 | 64252880 | T | C | 0.49 | 1.21E-05 | 4.85E-02 | 1.03E-01 |
| rs12908891 | Brain_Putamen_basal_ganglia | 15 | <i>RP11-321G12.1</i> | 63705841 | s145159458 | 0.9119 | 64252880 | T | C | 0.49 | 1.21E-05 | 1.15E-02 | 5.68E-02 |
| rs12908891 | Brain_Putamen_basal_ganglia | 15 | <i>SNX22</i>         | 64446798 | s145159458 | 0.9119 | 64252880 | T | C | 0.49 | 1.21E-05 | 5.07E-03 | 4.40E-02 |
| rs12908891 | Brain_Putamen_basal_ganglia | 15 | <i>TRIP4</i>         | 64713724 | s145159458 | 0.9119 | 64252880 | T | C | 0.49 | 1.21E-05 | 3.24E-02 | 8.53E-02 |
| rs12908891 | Brain_Putamen_basal_ganglia | 15 | <i>TPM1</i>          | 63349472 | rs4776692  | 0.9881 | 64255083 | G | A | 0.50 | 1.06E-05 | 2.32E-02 | 8.99E-02 |
| rs12908891 | Brain_Putamen_basal_ganglia | 15 | <i>CA12</i>          | 63643968 | rs4776692  | 0.9881 | 64255083 | G | A | 0.50 | 1.06E-05 | 4.42E-02 | 1.14E-01 |
| rs12908891 | Brain_Putamen_basal_ganglia | 15 | <i>RP11-321G12.1</i> | 63705841 | rs4776692  | 0.9881 | 64255083 | G | A | 0.50 | 1.06E-05 | 1.88E-02 | 8.39E-02 |
| rs12908891 | Brain_Putamen_basal_ganglia | 15 | <i>SNX22</i>         | 64446798 | rs4776692  | 0.9881 | 64255083 | G | A | 0.50 | 1.06E-05 | 4.52E-03 | 5.77E-02 |
| rs12908891 | Brain_Putamen_basal_ganglia | 15 | <i>TRIP4</i>         | 64713724 | rs4776692  | 0.9881 | 64255083 | G | A | 0.50 | 1.06E-05 | 2.65E-02 | 9.40E-02 |
| rs12908891 | Brain_Putamen_basal_ganglia | 15 | <i>RBPMS2</i>        | 65049938 | rs4776692  | 0.9881 | 64255083 | G | A | 0.50 | 1.06E-05 | 4.95E-02 | 1.20E-01 |
| rs12908891 | Brain_Putamen_basal_ganglia | 15 | <i>TPM1</i>          | 63349472 | rs28822416 | 0.8420 | 64257845 | C | T | 0.45 | 1.54E-05 | 3.98E-02 | 6.71E-02 |
| rs12908891 | Brain_Putamen_basal_ganglia | 15 | <i>RP11-321G12.1</i> | 63705841 | rs28822416 | 0.8420 | 64257845 | C | T | 0.45 | 1.54E-05 | 1.68E-02 | 3.98E-02 |
| rs12908891 | Brain_Putamen_basal_ganglia | 15 | <i>SNX22</i>         | 64446798 | rs28822416 | 0.8420 | 64257845 | C | T | 0.45 | 1.54E-05 | 2.36E-02 | 4.85E-02 |
| rs12908891 | Brain_Putamen_basal_ganglia | 15 | <i>RBPMS2</i>        | 65049938 | rs28822416 | 0.8420 | 64257845 | C | T | 0.45 | 1.54E-05 | 4.31E-02 | 7.07E-02 |
| rs12908891 | Brain_Putamen_basal_ganglia | 15 | <i>TPM1</i>          | 63349472 | rs8035776  | 0.8420 | 64258018 | G | A | 0.45 | 1.54E-05 | 3.98E-02 | 6.71E-02 |
| rs12908891 | Brain_Putamen_basal_ganglia | 15 | <i>RP11-321G12.1</i> | 63705841 | rs8035776  | 0.8420 | 64258018 | G | A | 0.45 | 1.54E-05 | 1.68E-02 | 3.98E-02 |
| rs12908891 | Brain_Putamen_basal_ganglia | 15 | <i>SNX22</i>         | 64446798 | rs8035776  | 0.8420 | 64258018 | G | A | 0.45 | 1.54E-05 | 2.36E-02 | 4.85E-02 |
| rs12908891 | Brain_Putamen_basal_ganglia | 15 | <i>RBPMS2</i>        | 65049938 | rs8035776  | 0.8420 | 64258018 | G | A | 0.45 | 1.54E-05 | 4.31E-02 | 7.07E-02 |
| rs12908891 | Brain_Putamen_basal_ganglia | 15 | <i>TPM1</i>          | 63349472 | rs6494456  | 0.8381 | 64258260 | C | T | 0.45 | 1.54E-05 | 3.98E-02 | 6.71E-02 |
| rs12908891 | Brain_Putamen_basal_ganglia | 15 | <i>RP11-321G12.1</i> | 63705841 | rs6494456  | 0.8381 | 64258260 | C | T | 0.45 | 1.54E-05 | 1.68E-02 | 3.98E-02 |
| rs12908891 | Brain_Putamen_basal_ganglia | 15 | <i>SNX22</i>         | 64446798 | rs6494456  | 0.8381 | 64258260 | C | T | 0.45 | 1.54E-05 | 2.36E-02 | 4.85E-02 |
| rs12908891 | Brain_Putamen_basal_ganglia | 15 | <i>RBPMS2</i>        | 65049938 | rs6494456  | 0.8381 | 64258260 | C | T | 0.45 | 1.54E-05 | 4.31E-02 | 7.07E-02 |
| rs12908891 | Brain_Putamen_basal_ganglia | 15 | <i>TPM1</i>          | 63349472 | rs4776695  | 0.8350 | 64259115 | T | C | 0.46 | 9.12E-06 | 7.89E-03 | 2.41E-02 |
| rs12908891 | Brain_Putamen_basal_ganglia | 15 | <i>RPS27L</i>        | 63434145 | rs4776695  | 0.8350 | 64259115 | T | C | 0.46 | 9.12E-06 | 2.70E-02 | 4.96E-02 |
| rs12908891 | Brain_Putamen_basal_ganglia | 15 | <i>RP11-321G12.1</i> | 63705841 | rs4776695  | 0.8350 | 64259115 | T | C | 0.46 | 9.12E-06 | 4.12E-02 | 6.54E-02 |

|            |                                |    |                      |          |            |        |          |   |   |      |          |          |          |
|------------|--------------------------------|----|----------------------|----------|------------|--------|----------|---|---|------|----------|----------|----------|
| rs12908891 | Brain_Putamen_basal_ganglia    | 15 | <i>SNX22</i>         | 64446798 | rs4776695  | 0.8350 | 64259115 | T | C | 0.46 | 9.12E-06 | 1.18E-02 | 3.00E-02 |
| rs12908891 | Brain_Putamen_basal_ganglia    | 15 | <i>ANKDD1A</i>       | 65227571 | rs4776695  | 0.8350 | 64259115 | T | C | 0.46 | 9.12E-06 | 4.14E-02 | 6.57E-02 |
| rs12908891 | Brain_Spinal_cord_cervical_c-1 | 15 | <i>APH1B</i>         | 63584771 | rs1460544  | 0.8736 | 64201766 | T | C | 0.51 | 9.06E-04 | 3.33E-02 | 1.51E-01 |
| rs12908891 | Brain_Spinal_cord_cervical_c-1 | 15 | <i>APH1B</i>         | 63584771 | rs1037846  | 0.8696 | 64204870 | G | A | 0.51 | 6.33E-04 | 2.72E-02 | 5.78E-02 |
| rs12908891 | Brain_Spinal_cord_cervical_c-1 | 15 | <i>FBXL22</i>        | 63892089 | rs1037846  | 0.8696 | 64204870 | G | A | 0.51 | 6.33E-04 | 4.70E-02 | 8.00E-02 |
| rs12908891 | Brain_Spinal_cord_cervical_c-1 | 15 | <i>APH1B</i>         | 63584771 | rs11071773 | 0.8883 | 64206765 | A | G | 0.51 | 8.95E-04 | 3.88E-02 | 1.30E-01 |
| rs12908891 | Brain_Spinal_cord_cervical_c-1 | 15 | <i>APH1B</i>         | 63584771 | rs12909081 | 0.8809 | 64208260 | A | C | 0.51 | 1.00E-03 | 4.40E-02 | 1.40E-01 |
| rs12908891 | Brain_Spinal_cord_cervical_c-1 | 15 | <i>APH1B</i>         | 63584771 | rs749468   | 0.9493 | 64210279 | T | C | 0.53 | 2.79E-04 | 4.48E-02 | 7.70E-02 |
| rs12908891 | Brain_Spinal_cord_cervical_c-1 | 15 | <i>FBXL22</i>        | 63892089 | rs749468   | 0.9493 | 64210279 | T | C | 0.53 | 2.79E-04 | 3.18E-02 | 6.27E-02 |
| rs12908891 | Brain_Spinal_cord_cervical_c-1 | 15 | <i>APH1B</i>         | 63584771 | rs2414844  | 0.8846 | 64210675 | A | G | 0.51 | 9.01E-04 | 4.40E-02 | 1.37E-01 |
| rs12908891 | Brain_Spinal_cord_cervical_c-1 | 15 | <i>APH1B</i>         | 63584771 | rs12592060 | 0.8846 | 64210780 | T | C | 0.51 | 9.01E-04 | 4.40E-02 | 1.37E-01 |
| rs12908891 | Brain_Spinal_cord_cervical_c-1 | 15 | <i>APH1B</i>         | 63584771 | rs1471282  | 0.8846 | 64212275 | G | T | 0.51 | 1.07E-03 | 4.40E-02 | 1.43E-01 |
| rs12908891 | Brain_Spinal_cord_cervical_c-1 | 15 | <i>APH1B</i>         | 63584771 | rs11635779 | 0.8808 | 64213826 | T | C | 0.50 | 6.34E-05 | 4.40E-02 | 8.60E-02 |
| rs12908891 | Brain_Spinal_cord_cervical_c-1 | 15 | <i>APH1B</i>         | 63584771 | rs12904374 | 0.8808 | 64214670 | T | A | 0.51 | 8.63E-04 | 3.88E-02 | 7.38E-02 |
| rs12908891 | Brain_Spinal_cord_cervical_c-1 | 15 | <i>APH1B</i>         | 63584771 | rs920762   | 0.9379 | 64214954 | C | G | 0.47 | 1.24E-05 | 2.24E-02 | 4.05E-02 |
| rs12908891 | Brain_Spinal_cord_cervical_c-1 | 15 | <i>FBXL22</i>        | 63892089 | rs920762   | 0.9379 | 64214954 | C | G | 0.47 | 1.24E-05 | 3.26E-02 | 5.22E-02 |
| rs12908891 | Brain_Spinal_cord_cervical_c-1 | 15 | <i>APH1B</i>         | 63584771 | rs11853632 | 0.8921 | 64217845 | C | G | 0.50 | 4.21E-05 | 3.34E-02 | 7.11E-02 |
| rs12908891 | Brain_Spinal_cord_cervical_c-1 | 15 | <i>FBXL22</i>        | 63892089 | rs11853632 | 0.8921 | 64217845 | C | G | 0.50 | 4.21E-05 | 4.27E-02 | 8.16E-02 |
| rs12908891 | Brain_Spinal_cord_cervical_c-1 | 15 | <i>APH1B</i>         | 63584771 | rs12907405 | 0.8884 | 64220046 | T | C | 0.50 | 4.35E-05 | 4.40E-02 | 8.32E-02 |
| rs12908891 | Brain_Spinal_cord_cervical_c-1 | 15 | <i>APH1B</i>         | 63584771 | rs11071775 | 0.8808 | 64220995 | A | G | 0.50 | 4.81E-05 | 4.23E-02 | 8.15E-02 |
| rs12908891 | Brain_Spinal_cord_cervical_c-1 | 15 | <i>FBXL22</i>        | 63892089 | rs11071775 | 0.8808 | 64220995 | A | G | 0.50 | 4.81E-05 | 2.57E-02 | 6.23E-02 |
| rs12908891 | Brain_Spinal_cord_cervical_c-1 | 15 | <i>CSNK1G1</i>       | 64553079 | rs11071775 | 0.8808 | 64220995 | A | G | 0.50 | 4.81E-05 | 4.23E-02 | 8.14E-02 |
| rs12908891 | Brain_Spinal_cord_cervical_c-1 | 15 | <i>APH1B</i>         | 63584771 | rs11071776 | 0.8808 | 64221010 | T | A | 0.50 | 5.49E-05 | 4.23E-02 | 8.24E-02 |
| rs12908891 | Brain_Spinal_cord_cervical_c-1 | 15 | <i>FBXL22</i>        | 63892089 | rs11071776 | 0.8808 | 64221010 | T | A | 0.50 | 5.49E-05 | 2.57E-02 | 6.33E-02 |
| rs12908891 | Brain_Spinal_cord_cervical_c-1 | 15 | <i>CSNK1G1</i>       | 64553079 | rs11071776 | 0.8808 | 64221010 | T | A | 0.50 | 5.49E-05 | 4.23E-02 | 8.24E-02 |
| rs12908891 | Brain_Spinal_cord_cervical_c-1 | 15 | <i>FBXL22</i>        | 63892089 | rs11637858 | 0.8959 | 64224107 | C | T | 0.49 | 4.60E-05 | 3.56E-02 | 7.36E-02 |
| rs12908891 | Brain_Spinal_cord_cervical_c-1 | 15 | <i>CSNK1G1</i>       | 64553079 | rs11637858 | 0.8959 | 64224107 | C | T | 0.49 | 4.60E-05 | 3.33E-02 | 7.10E-02 |
| rs12908891 | Brain_Spinal_cord_cervical_c-1 | 15 | <i>FBXL22</i>        | 63892089 | rs12916395 | 0.9921 | 64225563 | T | C | 0.51 | 1.86E-06 | 2.61E-02 | 4.24E-02 |
| rs12908891 | Brain_Spinal_cord_cervical_c-1 | 15 | <i>FBXL22</i>        | 63892089 | rs11630587 | 0.9921 | 64225908 | C | T | 0.51 | 1.77E-06 | 2.61E-02 | 4.23E-02 |
| rs12908891 | Brain_Spinal_cord_cervical_c-1 | 15 | <i>RAB8B</i>         | 63520824 | rs4776677  | 0.9921 | 64227044 | C | T | 0.51 | 1.54E-06 | 3.83E-02 | 5.58E-02 |
| rs12908891 | Brain_Spinal_cord_cervical_c-1 | 15 | <i>FBXL22</i>        | 63892089 | rs4776677  | 0.9921 | 64227044 | C | T | 0.51 | 1.54E-06 | 2.46E-02 | 4.05E-02 |
| rs12908891 | Brain_Spinal_cord_cervical_c-1 | 15 | <i>TRIP4</i>         | 64713724 | rs4776677  | 0.9921 | 64227044 | C | T | 0.51 | 1.54E-06 | 4.65E-02 | 6.46E-02 |
| rs12908891 | Brain_Spinal_cord_cervical_c-1 | 15 | <i>APH1B</i>         | 63584771 | rs11071777 | 0.8557 | 64229285 | C | G | 0.55 | 9.20E-06 | 4.29E-02 | 6.35E-02 |
| rs12908891 | Brain_Spinal_cord_cervical_c-1 | 15 | <i>FBXL22</i>        | 63892089 | rs11071777 | 0.8557 | 64229285 | C | G | 0.55 | 9.20E-06 | 1.77E-02 | 3.48E-02 |
| rs12908891 | Brain_Spinal_cord_cervical_c-1 | 15 | <i>FBXL22</i>        | 63892089 | rs1563886  | 0.9272 | 64230852 | G | C | 0.49 | 8.06E-06 | 1.64E-02 | 5.27E-02 |
| rs12908891 | Brain_Spinal_cord_cervical_c-1 | 15 | <i>FBXL22</i>        | 63892089 | rs10744961 | 0.9960 | 64230930 | A | G | 0.51 | 1.86E-06 | 2.61E-02 | 4.28E-02 |
| rs12908891 | Brain_Spinal_cord_cervical_c-1 | 15 | <i>FBXL22</i>        | 63892089 | rs6494454  | 0.8031 | 64233563 | A | C | 0.56 | 2.52E-05 | 2.37E-02 | 4.60E-02 |
| rs12908891 | Brain_Spinal_cord_cervical_c-1 | 15 | <i>RP11-111E14.1</i> | 64224312 | rs6494454  | 0.8031 | 64233563 | A | C | 0.56 | 2.52E-05 | 1.56E-02 | 3.57E-02 |
| rs12908891 | Brain_Spinal_cord_cervical_c-1 | 15 | <i>FBXL22</i>        | 63892089 | rs894660   | 0.8031 | 64234334 | C | T | 0.56 | 2.52E-05 | 2.37E-02 | 4.60E-02 |
| rs12908891 | Brain_Spinal_cord_cervical_c-1 | 15 | <i>RP11-111E14.1</i> | 64224312 | rs894660   | 0.8031 | 64234334 | C | T | 0.56 | 2.52E-05 | 1.56E-02 | 3.57E-02 |

|            |                                |    |               |          |             |        |          |   |   |      |          |          |          |
|------------|--------------------------------|----|---------------|----------|-------------|--------|----------|---|---|------|----------|----------|----------|
| rs12908891 | Brain_Spinal_cord_cervical_c-1 | 15 | FBXL22        | 63892089 | rs4776266   | 0.8031 | 64236175 | G | T | 0.56 | 2.23E-05 | 2.04E-02 | 4.18E-02 |
| rs12908891 | Brain_Spinal_cord_cervical_c-1 | 15 | RP11-111E14.1 | 64224312 | rs4776266   | 0.8031 | 64236175 | G | T | 0.56 | 2.23E-05 | 2.42E-02 | 4.64E-02 |
| rs12908891 | Brain_Spinal_cord_cervical_c-1 | 15 | FBXL22        | 63892089 | rs4776268   | 1.0000 | 64236398 | A | G | 0.51 | 6.19E-06 | 1.62E-02 | 6.83E-02 |
| rs12908891 | Brain_Spinal_cord_cervical_c-1 | 15 | RAB8B         | 63520824 | rs12908891  | 1.0000 | 64236441 | A | G | 0.52 | 1.39E-06 | 4.81E-02 | 6.64E-02 |
| rs12908891 | Brain_Spinal_cord_cervical_c-1 | 15 | FBXL22        | 63892089 | rs12908891  | 1.0000 | 64236441 | A | G | 0.52 | 1.39E-06 | 1.29E-02 | 2.63E-02 |
| rs12908891 | Brain_Spinal_cord_cervical_c-1 | 15 | TRIP4         | 64713724 | rs12908891  | 1.0000 | 64236441 | A | G | 0.52 | 1.39E-06 | 4.60E-02 | 6.42E-02 |
| rs12908891 | Brain_Spinal_cord_cervical_c-1 | 15 | FBXL22        | 63892089 | rs11071779  | 0.9881 | 64239044 | G | A | 0.51 | 1.57E-06 | 2.75E-02 | 4.46E-02 |
| rs12908891 | Brain_Spinal_cord_cervical_c-1 | 15 | RP11-111E14.1 | 64224312 | rs11071779  | 0.9881 | 64239044 | G | A | 0.51 | 1.57E-06 | 2.96E-02 | 4.70E-02 |
| rs12908891 | Brain_Spinal_cord_cervical_c-1 | 15 | APH1B         | 63584771 | rs11071780  | 0.9842 | 64241691 | A | G | 0.51 | 4.74E-06 | 4.99E-02 | 1.11E-01 |
| rs12908891 | Brain_Spinal_cord_cervical_c-1 | 15 | FBXL22        | 63892089 | rs11071780  | 0.9842 | 64241691 | A | G | 0.51 | 4.74E-06 | 2.42E-02 | 8.18E-02 |
| rs12908891 | Brain_Spinal_cord_cervical_c-1 | 15 | RP11-111E14.1 | 64224312 | rs11071780  | 0.9842 | 64241691 | A | G | 0.51 | 4.74E-06 | 3.41E-02 | 9.38E-02 |
| rs12908891 | Brain_Spinal_cord_cervical_c-1 | 15 | APH1B         | 63584771 | rs11854537  | 0.9842 | 64241733 | A | G | 0.51 | 4.74E-06 | 4.99E-02 | 1.11E-01 |
| rs12908891 | Brain_Spinal_cord_cervical_c-1 | 15 | FBXL22        | 63892089 | rs11854537  | 0.9842 | 64241733 | A | G | 0.51 | 4.74E-06 | 2.42E-02 | 8.18E-02 |
| rs12908891 | Brain_Spinal_cord_cervical_c-1 | 15 | RP11-111E14.1 | 64224312 | rs11854537  | 0.9842 | 64241733 | A | G | 0.51 | 4.74E-06 | 3.41E-02 | 9.38E-02 |
| rs12908891 | Brain_Spinal_cord_cervical_c-1 | 15 | APH1B         | 63584771 | rs1380844   | 0.9881 | 64242007 | G | T | 0.51 | 4.74E-06 | 4.99E-02 | 1.11E-01 |
| rs12908891 | Brain_Spinal_cord_cervical_c-1 | 15 | FBXL22        | 63892089 | rs1380844   | 0.9881 | 64242007 | G | T | 0.51 | 4.74E-06 | 2.42E-02 | 8.18E-02 |
| rs12908891 | Brain_Spinal_cord_cervical_c-1 | 15 | RP11-111E14.1 | 64224312 | rs1380844   | 0.9881 | 64242007 | G | T | 0.51 | 4.74E-06 | 3.41E-02 | 9.38E-02 |
| rs12908891 | Brain_Spinal_cord_cervical_c-1 | 15 | APH1B         | 63584771 | rs12916806  | 0.9881 | 64242770 | C | A | 0.51 | 4.64E-06 | 4.99E-02 | 1.11E-01 |
| rs12908891 | Brain_Spinal_cord_cervical_c-1 | 15 | FBXL22        | 63892089 | rs12916806  | 0.9881 | 64242770 | C | A | 0.51 | 4.64E-06 | 2.42E-02 | 8.18E-02 |
| rs12908891 | Brain_Spinal_cord_cervical_c-1 | 15 | RP11-111E14.1 | 64224312 | rs12916806  | 0.9881 | 64242770 | C | A | 0.51 | 4.64E-06 | 3.41E-02 | 9.37E-02 |
| rs12908891 | Brain_Spinal_cord_cervical_c-1 | 15 | APH1B         | 63584771 | rs11071781  | 0.9195 | 64243933 | G | A | 0.49 | 4.75E-06 | 4.98E-02 | 9.36E-02 |
| rs12908891 | Brain_Spinal_cord_cervical_c-1 | 15 | APH1B         | 63584771 | rs1304365   | 0.9881 | 64245946 | A | G | 0.51 | 4.67E-06 | 4.99E-02 | 1.11E-01 |
| rs12908891 | Brain_Spinal_cord_cervical_c-1 | 15 | FBXL22        | 63892089 | rs1304365   | 0.9881 | 64245946 | A | G | 0.51 | 4.67E-06 | 2.42E-02 | 8.19E-02 |
| rs12908891 | Brain_Spinal_cord_cervical_c-1 | 15 | RP11-111E14.1 | 64224312 | rs1304365   | 0.9881 | 64245946 | A | G | 0.51 | 4.67E-06 | 3.41E-02 | 9.38E-02 |
| rs12908891 | Brain_Spinal_cord_cervical_c-1 | 15 | APH1B         | 63584771 | rs115415409 | 0.8420 | 64249559 | T | C | 0.45 | 1.45E-05 | 1.56E-02 | 3.80E-02 |
| rs12908891 | Brain_Spinal_cord_cervical_c-1 | 15 | FBXL22        | 63892089 | rs115415409 | 0.8420 | 64249559 | T | C | 0.45 | 1.45E-05 | 3.36E-02 | 6.00E-02 |
| rs12908891 | Brain_Spinal_cord_cervical_c-1 | 15 | FBXL22        | 63892089 | rs145159458 | 0.9119 | 64252880 | T | C | 0.49 | 1.21E-05 | 2.45E-02 | 7.56E-02 |
| rs12908891 | Brain_Spinal_cord_cervical_c-1 | 15 | RP11-111E14.1 | 64224312 | rs145159458 | 0.9119 | 64252880 | T | C | 0.49 | 1.21E-05 | 4.84E-02 | 1.03E-01 |
| rs12908891 | Brain_Spinal_cord_cervical_c-1 | 15 | APH1B         | 63584771 | rs4776692   | 0.9881 | 64255083 | G | A | 0.50 | 1.06E-05 | 4.99E-02 | 1.20E-01 |
| rs12908891 | Brain_Spinal_cord_cervical_c-1 | 15 | FBXL22        | 63892089 | rs4776692   | 0.9881 | 64255083 | G | A | 0.50 | 1.06E-05 | 2.42E-02 | 9.11E-02 |
| rs12908891 | Brain_Spinal_cord_cervical_c-1 | 15 | RP11-111E14.1 | 64224312 | rs4776692   | 0.9881 | 64255083 | G | A | 0.50 | 1.06E-05 | 3.41E-02 | 1.03E-01 |
| rs12908891 | Brain_Spinal_cord_cervical_c-1 | 15 | APH1B         | 63584771 | rs28822416  | 0.8420 | 64257845 | C | T | 0.45 | 1.54E-05 | 1.76E-02 | 4.08E-02 |
| rs12908891 | Brain_Spinal_cord_cervical_c-1 | 15 | FBXL22        | 63892089 | rs28822416  | 0.8420 | 64257845 | C | T | 0.45 | 1.54E-05 | 2.29E-02 | 4.77E-02 |
| rs12908891 | Brain_Spinal_cord_cervical_c-1 | 15 | APH1B         | 63584771 | rs8035776   | 0.8420 | 64258018 | G | A | 0.45 | 1.54E-05 | 1.76E-02 | 4.08E-02 |
| rs12908891 | Brain_Spinal_cord_cervical_c-1 | 15 | FBXL22        | 63892089 | rs8035776   | 0.8420 | 64258018 | G | A | 0.45 | 1.54E-05 | 2.29E-02 | 4.77E-02 |
| rs12908891 | Brain_Spinal_cord_cervical_c-1 | 15 | APH1B         | 63584771 | rs6494456   | 0.8381 | 64258260 | C | T | 0.45 | 1.54E-05 | 1.76E-02 | 4.08E-02 |
| rs12908891 | Brain_Spinal_cord_cervical_c-1 | 15 | FBXL22        | 63892089 | rs6494456   | 0.8381 | 64258260 | C | T | 0.45 | 1.54E-05 | 2.29E-02 | 4.77E-02 |
| rs12908891 | Brain_Spinal_cord_cervical_c-1 | 15 | APH1B         | 63584771 | rs4776695   | 0.8350 | 64259115 | T | C | 0.46 | 9.12E-06 | 3.44E-02 | 5.80E-02 |
| rs12908891 | Brain_Spinal_cord_cervical_c-1 | 15 | FBXL22        | 63892089 | rs4776695   | 0.8350 | 64259115 | T | C | 0.46 | 9.12E-06 | 4.93E-02 | 7.41E-02 |
| rs12908891 | Brain_Spinal_cord_cervical_c-1 | 15 | RP11-111E14.1 | 64224312 | rs4776695   | 0.8350 | 64259115 | T | C | 0.46 | 9.12E-06 | 4.54E-02 | 7.00E-02 |

|            |                        |    |                |          |            |        |          |   |   |      |          |          |          |
|------------|------------------------|----|----------------|----------|------------|--------|----------|---|---|------|----------|----------|----------|
| rs12908891 | Brain_Substantia_nigra | 15 | <i>FBXL22</i>  | 63892089 | rs1460544  | 0.8736 | 64201766 | T | C | 0.51 | 9.06E-04 | 9.01E-03 | 1.19E-01 |
| rs12908891 | Brain_Substantia_nigra | 15 | <i>CA12</i>    | 63643968 | rs1037846  | 0.8696 | 64204870 | G | A | 0.51 | 6.33E-04 | 3.22E-02 | 6.38E-02 |
| rs12908891 | Brain_Substantia_nigra | 15 | <i>FBXL22</i>  | 63892089 | rs1037846  | 0.8696 | 64204870 | G | A | 0.51 | 6.33E-04 | 2.22E-02 | 5.17E-02 |
| rs12908891 | Brain_Substantia_nigra | 15 | <i>ZNF609</i>  | 64865602 | rs1037846  | 0.8696 | 64204870 | G | A | 0.51 | 6.33E-04 | 3.73E-02 | 6.95E-02 |
| rs12908891 | Brain_Substantia_nigra | 15 | <i>FBXL22</i>  | 63892089 | rs11071773 | 0.8883 | 64206765 | A | G | 0.51 | 8.95E-04 | 6.97E-03 | 8.65E-02 |
| rs12908891 | Brain_Substantia_nigra | 15 | <i>ZNF609</i>  | 64865602 | rs11071773 | 0.8883 | 64206765 | A | G | 0.51 | 8.95E-04 | 3.87E-02 | 1.30E-01 |
| rs12908891 | Brain_Substantia_nigra | 15 | <i>CA12</i>    | 63643968 | rs12909081 | 0.8809 | 64208260 | A | C | 0.51 | 1.00E-03 | 4.53E-02 | 1.41E-01 |
| rs12908891 | Brain_Substantia_nigra | 15 | <i>FBXL22</i>  | 63892089 | rs12909081 | 0.8809 | 64208260 | A | C | 0.51 | 1.00E-03 | 6.35E-03 | 8.90E-02 |
| rs12908891 | Brain_Substantia_nigra | 15 | <i>FBXL22</i>  | 63892089 | rs749468   | 0.9493 | 64210279 | T | C | 0.53 | 2.79E-04 | 3.28E-03 | 2.09E-02 |
| rs12908891 | Brain_Substantia_nigra | 15 | <i>CA12</i>    | 63643968 | rs2414844  | 0.8846 | 64210675 | A | G | 0.51 | 9.01E-04 | 4.53E-02 | 1.38E-01 |
| rs12908891 | Brain_Substantia_nigra | 15 | <i>FBXL22</i>  | 63892089 | rs2414844  | 0.8846 | 64210675 | A | G | 0.51 | 9.01E-04 | 6.35E-03 | 8.59E-02 |
| rs12908891 | Brain_Substantia_nigra | 15 | <i>CA12</i>    | 63643968 | rs12592060 | 0.8846 | 64210780 | T | C | 0.51 | 9.01E-04 | 4.53E-02 | 1.38E-01 |
| rs12908891 | Brain_Substantia_nigra | 15 | <i>FBXL22</i>  | 63892089 | rs12592060 | 0.8846 | 64210780 | T | C | 0.51 | 9.01E-04 | 6.35E-03 | 8.59E-02 |
| rs12908891 | Brain_Substantia_nigra | 15 | <i>CA12</i>    | 63643968 | rs1471282  | 0.8846 | 64212275 | G | T | 0.51 | 1.07E-03 | 4.53E-02 | 1.44E-01 |
| rs12908891 | Brain_Substantia_nigra | 15 | <i>FBXL22</i>  | 63892089 | rs1471282  | 0.8846 | 64212275 | G | T | 0.51 | 1.07E-03 | 6.35E-03 | 9.24E-02 |
| rs12908891 | Brain_Substantia_nigra | 15 | <i>CA12</i>    | 63643968 | rs11635779 | 0.8808 | 64213826 | T | C | 0.50 | 6.34E-05 | 3.07E-02 | 7.11E-02 |
| rs12908891 | Brain_Substantia_nigra | 15 | <i>FBXL22</i>  | 63892089 | rs11635779 | 0.8808 | 64213826 | T | C | 0.50 | 6.34E-05 | 4.27E-03 | 3.12E-02 |
| rs12908891 | Brain_Substantia_nigra | 15 | <i>CSNK1G1</i> | 64553079 | rs11635779 | 0.8808 | 64213826 | T | C | 0.50 | 6.34E-05 | 4.31E-02 | 8.51E-02 |
| rs12908891 | Brain_Substantia_nigra | 15 | <i>CA12</i>    | 63643968 | rs12904374 | 0.8808 | 64214670 | T | A | 0.51 | 8.63E-04 | 4.00E-02 | 7.52E-02 |
| rs12908891 | Brain_Substantia_nigra | 15 | <i>FBXL22</i>  | 63892089 | rs12904374 | 0.8808 | 64214670 | T | A | 0.51 | 8.63E-04 | 4.51E-03 | 2.64E-02 |
| rs12908891 | Brain_Substantia_nigra | 15 | <i>CA12</i>    | 63643968 | rs920762   | 0.9379 | 64214954 | C | G | 0.47 | 1.24E-05 | 4.14E-02 | 6.19E-02 |
| rs12908891 | Brain_Substantia_nigra | 15 | <i>FBXL22</i>  | 63892089 | rs920762   | 0.9379 | 64214954 | C | G | 0.47 | 1.24E-05 | 1.61E-02 | 3.27E-02 |
| rs12908891 | Brain_Substantia_nigra | 15 | <i>ZNF609</i>  | 64865602 | rs920762   | 0.9379 | 64214954 | C | G | 0.47 | 1.24E-05 | 4.62E-02 | 6.71E-02 |
| rs12908891 | Brain_Substantia_nigra | 15 | <i>CA12</i>    | 63643968 | rs11853632 | 0.8921 | 64217845 | C | G | 0.50 | 4.21E-05 | 3.51E-02 | 7.31E-02 |
| rs12908891 | Brain_Substantia_nigra | 15 | <i>FBXL22</i>  | 63892089 | rs11853632 | 0.8921 | 64217845 | C | G | 0.50 | 4.21E-05 | 1.16E-02 | 4.26E-02 |
| rs12908891 | Brain_Substantia_nigra | 15 | <i>CSNK1G1</i> | 64553079 | rs11853632 | 0.8921 | 64217845 | C | G | 0.50 | 4.21E-05 | 2.84E-02 | 6.52E-02 |
| rs12908891 | Brain_Substantia_nigra | 15 | <i>ZNF609</i>  | 64865602 | rs11853632 | 0.8921 | 64217845 | C | G | 0.50 | 4.21E-05 | 3.37E-02 | 7.15E-02 |
| rs12908891 | Brain_Substantia_nigra | 15 | <i>CA12</i>    | 63643968 | rs12907405 | 0.8884 | 64220046 | T | C | 0.50 | 4.35E-05 | 3.10E-02 | 6.87E-02 |
| rs12908891 | Brain_Substantia_nigra | 15 | <i>FBXL22</i>  | 63892089 | rs12907405 | 0.8884 | 64220046 | T | C | 0.50 | 4.35E-05 | 5.55E-03 | 3.17E-02 |
| rs12908891 | Brain_Substantia_nigra | 15 | <i>CA12</i>    | 63643968 | rs11071775 | 0.8808 | 64220995 | A | G | 0.50 | 4.81E-05 | 3.80E-02 | 7.67E-02 |
| rs12908891 | Brain_Substantia_nigra | 15 | <i>FBXL22</i>  | 63892089 | rs11071775 | 0.8808 | 64220995 | A | G | 0.50 | 4.81E-05 | 1.07E-02 | 4.13E-02 |
| rs12908891 | Brain_Substantia_nigra | 15 | <i>CA12</i>    | 63643968 | rs11071776 | 0.8808 | 64221010 | T | A | 0.50 | 5.49E-05 | 3.80E-02 | 7.77E-02 |
| rs12908891 | Brain_Substantia_nigra | 15 | <i>FBXL22</i>  | 63892089 | rs11071776 | 0.8808 | 64221010 | T | A | 0.50 | 5.49E-05 | 1.07E-02 | 4.22E-02 |
| rs12908891 | Brain_Substantia_nigra | 15 | <i>CA12</i>    | 63643968 | rs11637858 | 0.8959 | 64224107 | C | T | 0.49 | 4.60E-05 | 3.10E-02 | 6.84E-02 |
| rs12908891 | Brain_Substantia_nigra | 15 | <i>FBXL22</i>  | 63892089 | rs11637858 | 0.8959 | 64224107 | C | T | 0.49 | 4.60E-05 | 5.55E-03 | 3.14E-02 |
| rs12908891 | Brain_Substantia_nigra | 15 | <i>CA12</i>    | 63643968 | rs12916395 | 0.9921 | 64225563 | T | C | 0.51 | 1.86E-06 | 3.93E-02 | 5.71E-02 |
| rs12908891 | Brain_Substantia_nigra | 15 | <i>FBXL22</i>  | 63892089 | rs12916395 | 0.9921 | 64225563 | T | C | 0.51 | 1.86E-06 | 3.86E-02 | 5.64E-02 |
| rs12908891 | Brain_Substantia_nigra | 15 | <i>CA12</i>    | 63643968 | rs11630587 | 0.9921 | 64225908 | C | T | 0.51 | 1.77E-06 | 2.99E-02 | 4.67E-02 |
| rs12908891 | Brain_Substantia_nigra | 15 | <i>FBXL22</i>  | 63892089 | rs11630587 | 0.9921 | 64225908 | C | T | 0.51 | 1.77E-06 | 3.27E-02 | 4.99E-02 |
| rs12908891 | Brain_Substantia_nigra | 15 | <i>CSNK1G1</i> | 64553079 | rs11630587 | 0.9921 | 64225908 | C | T | 0.51 | 1.77E-06 | 3.86E-02 | 5.62E-02 |



|            |                        |    |            |          |             |        |          |   |   |      |          |          |          |
|------------|------------------------|----|------------|----------|-------------|--------|----------|---|---|------|----------|----------|----------|
| rs12908891 | Brain_Substantia_nigra | 15 | ZNF609     | 64865602 | rs11630587  | 0.9921 | 64225908 | C | T | 0.51 | 1.77E-06 | 3.66E-02 | 5.41E-02 |
| rs12908891 | Brain_Substantia_nigra | 15 | RAB8B      | 63520824 | rs4776677   | 0.9921 | 64227044 | C | T | 0.51 | 1.54E-06 | 2.85E-02 | 4.50E-02 |
| rs12908891 | Brain_Substantia_nigra | 15 | CA12       | 63643968 | rs4776677   | 0.9921 | 64227044 | C | T | 0.51 | 1.54E-06 | 4.98E-02 | 6.80E-02 |
| rs12908891 | Brain_Substantia_nigra | 15 | FBXL22     | 63892089 | rs4776677   | 0.9921 | 64227044 | C | T | 0.51 | 1.54E-06 | 3.00E-02 | 4.66E-02 |
| rs12908891 | Brain_Substantia_nigra | 15 | RAB8B      | 63520824 | rs11071777  | 0.8557 | 64229285 | C | G | 0.55 | 9.20E-06 | 2.42E-02 | 4.27E-02 |
| rs12908891 | Brain_Substantia_nigra | 15 | FBXL22     | 63892089 | rs11071777  | 0.8557 | 64229285 | C | G | 0.55 | 9.20E-06 | 2.23E-02 | 4.04E-02 |
| rs12908891 | Brain_Substantia_nigra | 15 | CA12       | 63643968 | rs1563886   | 0.9272 | 64230852 | G | C | 0.49 | 8.06E-06 | 4.99E-02 | 9.23E-02 |
| rs12908891 | Brain_Substantia_nigra | 15 | FBXL22     | 63892089 | rs1563886   | 0.9272 | 64230852 | G | C | 0.49 | 8.06E-06 | 4.17E-03 | 3.09E-02 |
| rs12908891 | Brain_Substantia_nigra | 15 | RAB8B      | 63520824 | rs10744961  | 0.9960 | 64230930 | A | G | 0.51 | 1.86E-06 | 4.87E-02 | 6.75E-02 |
| rs12908891 | Brain_Substantia_nigra | 15 | CA12       | 63643968 | rs10744961  | 0.9960 | 64230930 | A | G | 0.51 | 1.86E-06 | 3.17E-02 | 4.91E-02 |
| rs12908891 | Brain_Substantia_nigra | 15 | FBXL22     | 63892089 | rs10744961  | 0.9960 | 64230930 | A | G | 0.51 | 1.86E-06 | 2.90E-02 | 4.61E-02 |
| rs12908891 | Brain_Substantia_nigra | 15 | CA12       | 63643968 | rs6494454   | 0.8031 | 64233563 | A | C | 0.56 | 2.52E-05 | 4.45E-02 | 6.94E-02 |
| rs12908891 | Brain_Substantia_nigra | 15 | CA12       | 63643968 | rs894660    | 0.8031 | 64234334 | C | T | 0.56 | 2.52E-05 | 4.45E-02 | 6.94E-02 |
| rs12908891 | Brain_Substantia_nigra | 15 | CA12       | 63643968 | rs4776266   | 0.8031 | 64236175 | G | T | 0.56 | 2.23E-05 | 4.45E-02 | 6.92E-02 |
| rs12908891 | Brain_Substantia_nigra | 15 | CA12       | 63643968 | rs4776268   | 1.0000 | 64236398 | A | G | 0.51 | 6.19E-06 | 4.99E-02 | 1.08E-01 |
| rs12908891 | Brain_Substantia_nigra | 15 | FBXL22     | 63892089 | rs4776268   | 1.0000 | 64236398 | A | G | 0.51 | 6.19E-06 | 6.52E-03 | 5.11E-02 |
| rs12908891 | Brain_Substantia_nigra | 15 | FBXL22     | 63892089 | rs12908891  | 1.0000 | 64236441 | A | G | 0.52 | 1.39E-06 | 2.05E-02 | 3.58E-02 |
| rs12908891 | Brain_Substantia_nigra | 15 | FBXL22     | 63892089 | rs11071779  | 0.9881 | 64239044 | G | A | 0.51 | 1.57E-06 | 2.26E-02 | 3.90E-02 |
| rs12908891 | Brain_Substantia_nigra | 15 | FBXL22     | 63892089 | rs11071780  | 0.9842 | 64241691 | A | G | 0.51 | 4.74E-06 | 9.83E-03 | 6.03E-02 |
| rs12908891 | Brain_Substantia_nigra | 15 | FBXL22     | 63892089 | rs11854537  | 0.9842 | 64241733 | A | G | 0.51 | 4.74E-06 | 9.83E-03 | 6.03E-02 |
| rs12908891 | Brain_Substantia_nigra | 15 | FBXL22     | 63892089 | rs1380844   | 0.9881 | 64242007 | G | T | 0.51 | 4.74E-06 | 9.83E-03 | 6.03E-02 |
| rs12908891 | Brain_Substantia_nigra | 15 | FBXL22     | 63892089 | rs12916806  | 0.9881 | 64242770 | C | A | 0.51 | 4.64E-06 | 9.83E-03 | 6.03E-02 |
| rs12908891 | Brain_Substantia_nigra | 15 | CA12       | 63643968 | rs11071781  | 0.9195 | 64243933 | G | A | 0.49 | 4.75E-06 | 4.08E-02 | 8.39E-02 |
| rs12908891 | Brain_Substantia_nigra | 15 | FBXL22     | 63892089 | rs11071781  | 0.9195 | 64243933 | G | A | 0.49 | 4.75E-06 | 8.21E-03 | 4.08E-02 |
| rs12908891 | Brain_Substantia_nigra | 15 | FBXL22     | 63892089 | rs1304365   | 0.9881 | 64245946 | A | G | 0.51 | 4.67E-06 | 9.83E-03 | 6.04E-02 |
| rs12908891 | Brain_Substantia_nigra | 15 | RAB8B      | 63520824 | rs115415409 | 0.8420 | 64249559 | T | C | 0.45 | 1.45E-05 | 4.15E-02 | 6.87E-02 |
| rs12908891 | Brain_Substantia_nigra | 15 | AC100830.4 | 64987516 | rs115415409 | 0.8420 | 64249559 | T | C | 0.45 | 1.45E-05 | 3.24E-02 | 5.86E-02 |
| rs12908891 | Brain_Substantia_nigra | 15 | FBXL22     | 63892089 | rs145159458 | 0.9119 | 64252880 | T | C | 0.49 | 1.21E-05 | 6.49E-03 | 4.73E-02 |
| rs12908891 | Brain_Substantia_nigra | 15 | FBXL22     | 63892089 | rs4776692   | 0.9881 | 64255083 | G | A | 0.50 | 1.06E-05 | 9.83E-03 | 6.95E-02 |
| rs12908891 | Brain_Substantia_nigra | 15 | RAB8B      | 63520824 | rs28822416  | 0.8420 | 64257845 | C | T | 0.45 | 1.54E-05 | 3.60E-02 | 6.30E-02 |
| rs12908891 | Brain_Substantia_nigra | 15 | AC100830.4 | 64987516 | rs28822416  | 0.8420 | 64257845 | C | T | 0.45 | 1.54E-05 | 4.50E-02 | 7.27E-02 |
| rs12908891 | Brain_Substantia_nigra | 15 | RAB8B      | 63520824 | rs8035776   | 0.8420 | 64258018 | G | A | 0.45 | 1.54E-05 | 3.60E-02 | 6.30E-02 |
| rs12908891 | Brain_Substantia_nigra | 15 | AC100830.4 | 64987516 | rs8035776   | 0.8420 | 64258018 | G | A | 0.45 | 1.54E-05 | 4.50E-02 | 7.27E-02 |
| rs12908891 | Brain_Substantia_nigra | 15 | RAB8B      | 63520824 | rs6494456   | 0.8381 | 64258260 | C | T | 0.45 | 1.54E-05 | 3.60E-02 | 6.30E-02 |
| rs12908891 | Brain_Substantia_nigra | 15 | AC100830.4 | 64987516 | rs6494456   | 0.8381 | 64258260 | C | T | 0.45 | 1.54E-05 | 4.50E-02 | 7.27E-02 |
| rs12908891 | Brain_Substantia_nigra | 15 | CA12       | 63643968 | rs4776695   | 0.8350 | 64259115 | T | C | 0.46 | 9.12E-06 | 2.63E-02 | 4.87E-02 |
| rs12908891 | Brain_Substantia_nigra | 15 | FBXL22     | 63892089 | rs4776695   | 0.8350 | 64259115 | T | C | 0.46 | 9.12E-06 | 1.34E-03 | 1.03E-02 |
| rs12908891 | Whole_Blood            | 15 | DAPK2      | 64281733 | rs1460544   | 0.8736 | 64201766 | T | C | 0.51 | 9.06E-04 | 2.55E-02 | 1.43E-01 |
| rs12908891 | Whole_Blood            | 15 | KIAA0101   | 64668539 | rs1460544   | 0.8736 | 64201766 | T | C | 0.51 | 9.06E-04 | 1.51E-02 | 1.29E-01 |
| rs12908891 | Whole_Blood            | 15 | DAPK2      | 64281733 | rs1037846   | 0.8696 | 64204870 | G | A | 0.51 | 6.33E-04 | 1.74E-02 | 4.54E-02 |

|            |             |    |          |          |            |        |          |   |   |      |          |          |          |
|------------|-------------|----|----------|----------|------------|--------|----------|---|---|------|----------|----------|----------|
| rs12908891 | Whole_Blood | 15 | KIAA0101 | 64668539 | rs1037846  | 0.8696 | 64204870 | G | A | 0.51 | 6.33E-04 | 1.38E-02 | 4.03E-02 |
| rs12908891 | Whole_Blood | 15 | TPM1     | 63349472 | rs11071773 | 0.8883 | 64206765 | A | G | 0.51 | 8.95E-04 | 4.83E-02 | 1.40E-01 |
| rs12908891 | Whole_Blood | 15 | FBXL22   | 63892089 | rs11071773 | 0.8883 | 64206765 | A | G | 0.51 | 8.95E-04 | 4.83E-02 | 1.40E-01 |
| rs12908891 | Whole_Blood | 15 | DAPK2    | 64281733 | rs11071773 | 0.8883 | 64206765 | A | G | 0.51 | 8.95E-04 | 2.12E-02 | 1.10E-01 |
| rs12908891 | Whole_Blood | 15 | KIAA0101 | 64668539 | rs11071773 | 0.8883 | 64206765 | A | G | 0.51 | 8.95E-04 | 3.27E-02 | 1.24E-01 |
| rs12908891 | Whole_Blood | 15 | DAPK2    | 64281733 | rs12909081 | 0.8809 | 64208260 | A | C | 0.51 | 1.00E-03 | 1.51E-02 | 1.05E-01 |
| rs12908891 | Whole_Blood | 15 | KIAA0101 | 64668539 | rs12909081 | 0.8809 | 64208260 | A | C | 0.51 | 1.00E-03 | 3.23E-02 | 1.27E-01 |
| rs12908891 | Whole_Blood | 15 | TPM1     | 63349472 | rs749468   | 0.9493 | 64210279 | T | C | 0.53 | 2.79E-04 | 2.76E-02 | 5.77E-02 |
| rs12908891 | Whole_Blood | 15 | DAPK2    | 64281733 | rs749468   | 0.9493 | 64210279 | T | C | 0.53 | 2.79E-04 | 1.90E-02 | 4.70E-02 |
| rs12908891 | Whole_Blood | 15 | FBXL22   | 63892089 | rs2414844  | 0.8846 | 64210675 | A | G | 0.51 | 9.01E-04 | 4.91E-02 | 1.42E-01 |
| rs12908891 | Whole_Blood | 15 | DAPK2    | 64281733 | rs2414844  | 0.8846 | 64210675 | A | G | 0.51 | 9.01E-04 | 1.88E-02 | 1.07E-01 |
| rs12908891 | Whole_Blood | 15 | KIAA0101 | 64668539 | rs2414844  | 0.8846 | 64210675 | A | G | 0.51 | 9.01E-04 | 2.63E-02 | 1.17E-01 |
| rs12908891 | Whole_Blood | 15 | FBXL22   | 63892089 | rs12592060 | 0.8846 | 64210780 | T | C | 0.51 | 9.01E-04 | 4.91E-02 | 1.42E-01 |
| rs12908891 | Whole_Blood | 15 | DAPK2    | 64281733 | rs12592060 | 0.8846 | 64210780 | T | C | 0.51 | 9.01E-04 | 1.88E-02 | 1.07E-01 |
| rs12908891 | Whole_Blood | 15 | KIAA0101 | 64668539 | rs12592060 | 0.8846 | 64210780 | T | C | 0.51 | 9.01E-04 | 2.63E-02 | 1.17E-01 |
| rs12908891 | Whole_Blood | 15 | FBXL22   | 63892089 | rs1471282  | 0.8846 | 64212275 | G | T | 0.51 | 1.07E-03 | 4.91E-02 | 1.48E-01 |
| rs12908891 | Whole_Blood | 15 | DAPK2    | 64281733 | rs1471282  | 0.8846 | 64212275 | G | T | 0.51 | 1.07E-03 | 1.88E-02 | 1.14E-01 |
| rs12908891 | Whole_Blood | 15 | KIAA0101 | 64668539 | rs1471282  | 0.8846 | 64212275 | G | T | 0.51 | 1.07E-03 | 2.63E-02 | 1.24E-01 |
| rs12908891 | Whole_Blood | 15 | DAPK2    | 64281733 | rs11635779 | 0.8808 | 64213826 | T | C | 0.50 | 6.34E-05 | 1.48E-02 | 5.04E-02 |
| rs12908891 | Whole_Blood | 15 | KIAA0101 | 64668539 | rs11635779 | 0.8808 | 64213826 | T | C | 0.50 | 6.34E-05 | 3.89E-02 | 8.04E-02 |
| rs12908891 | Whole_Blood | 15 | DAPK2    | 64281733 | rs12904374 | 0.8808 | 64214670 | T | A | 0.51 | 8.63E-04 | 1.62E-02 | 4.62E-02 |
| rs12908891 | Whole_Blood | 15 | KIAA0101 | 64668539 | rs12904374 | 0.8808 | 64214670 | T | A | 0.51 | 8.63E-04 | 4.24E-02 | 7.79E-02 |
| rs12908891 | Whole_Blood | 15 | DAPK2    | 64281733 | rs920762   | 0.9379 | 64214954 | C | G | 0.47 | 1.24E-05 | 1.17E-02 | 2.67E-02 |
| rs12908891 | Whole_Blood | 15 | KIAA0101 | 64668539 | rs920762   | 0.9379 | 64214954 | C | G | 0.47 | 1.24E-05 | 1.56E-02 | 3.21E-02 |
| rs12908891 | Whole_Blood | 15 | FBXL22   | 63892089 | rs11853632 | 0.8921 | 64217845 | C | G | 0.50 | 4.21E-05 | 4.56E-02 | 8.47E-02 |
| rs12908891 | Whole_Blood | 15 | DAPK2    | 64281733 | rs11853632 | 0.8921 | 64217845 | C | G | 0.50 | 4.21E-05 | 1.55E-02 | 4.84E-02 |
| rs12908891 | Whole_Blood | 15 | KIAA0101 | 64668539 | rs11853632 | 0.8921 | 64217845 | C | G | 0.50 | 4.21E-05 | 2.93E-02 | 6.64E-02 |
| rs12908891 | Whole_Blood | 15 | FBXL22   | 63892089 | rs12907405 | 0.8884 | 64220046 | T | C | 0.50 | 4.35E-05 | 4.91E-02 | 8.86E-02 |
| rs12908891 | Whole_Blood | 15 | DAPK2    | 64281733 | rs12907405 | 0.8884 | 64220046 | T | C | 0.50 | 4.35E-05 | 1.88E-02 | 5.33E-02 |
| rs12908891 | Whole_Blood | 15 | KIAA0101 | 64668539 | rs12907405 | 0.8884 | 64220046 | T | C | 0.50 | 4.35E-05 | 2.63E-02 | 6.31E-02 |
| rs12908891 | Whole_Blood | 15 | DAPK2    | 64281733 | rs11071775 | 0.8808 | 64220995 | A | G | 0.50 | 4.81E-05 | 2.77E-02 | 6.48E-02 |
| rs12908891 | Whole_Blood | 15 | KIAA0101 | 64668539 | rs11071775 | 0.8808 | 64220995 | A | G | 0.50 | 4.81E-05 | 1.28E-02 | 4.48E-02 |
| rs12908891 | Whole_Blood | 15 | DAPK2    | 64281733 | rs11071776 | 0.8808 | 64221010 | T | A | 0.50 | 5.49E-05 | 2.77E-02 | 6.57E-02 |
| rs12908891 | Whole_Blood | 15 | KIAA0101 | 64668539 | rs11071776 | 0.8808 | 64221010 | T | A | 0.50 | 5.49E-05 | 1.28E-02 | 4.57E-02 |
| rs12908891 | Whole_Blood | 15 | DAPK2    | 64281733 | rs11637858 | 0.8959 | 64224107 | C | T | 0.49 | 4.60E-05 | 4.50E-02 | 8.40E-02 |
| rs12908891 | Whole_Blood | 15 | KIAA0101 | 64668539 | rs11637858 | 0.8959 | 64224107 | C | T | 0.49 | 4.60E-05 | 1.49E-02 | 4.75E-02 |
| rs12908891 | Whole_Blood | 15 | TPM1     | 63349472 | rs12916395 | 0.9921 | 64225563 | T | C | 0.51 | 1.86E-06 | 2.44E-02 | 4.05E-02 |
| rs12908891 | Whole_Blood | 15 | FBXL22   | 63892089 | rs12916395 | 0.9921 | 64225563 | T | C | 0.51 | 1.86E-06 | 3.28E-02 | 5.00E-02 |
| rs12908891 | Whole_Blood | 15 | DAPK2    | 64281733 | rs12916395 | 0.9921 | 64225563 | T | C | 0.51 | 1.86E-06 | 3.13E-02 | 4.84E-02 |
| rs12908891 | Whole_Blood | 15 | KIAA0101 | 64668539 | rs12916395 | 0.9921 | 64225563 | T | C | 0.51 | 1.86E-06 | 2.12E-02 | 3.67E-02 |

|            |             |    |          |          |             |        |          |   |   |      |          |          |          |
|------------|-------------|----|----------|----------|-------------|--------|----------|---|---|------|----------|----------|----------|
| rs12908891 | Whole_Blood | 15 | TPM1     | 63349472 | rs11630587  | 0.9921 | 64225908 | C | T | 0.51 | 1.77E-06 | 2.32E-02 | 3.90E-02 |
| rs12908891 | Whole_Blood | 15 | FBXL22   | 63892089 | rs11630587  | 0.9921 | 64225908 | C | T | 0.51 | 1.77E-06 | 1.95E-02 | 3.45E-02 |
| rs12908891 | Whole_Blood | 15 | KIAA0101 | 64668539 | rs11630587  | 0.9921 | 64225908 | C | T | 0.51 | 1.77E-06 | 3.56E-02 | 5.30E-02 |
| rs12908891 | Whole_Blood | 15 | TPM1     | 63349472 | rs4776677   | 0.9921 | 64227044 | C | T | 0.51 | 1.54E-06 | 3.00E-02 | 4.66E-02 |
| rs12908891 | Whole_Blood | 15 | DAPK2    | 64281733 | rs4776677   | 0.9921 | 64227044 | C | T | 0.51 | 1.54E-06 | 4.61E-02 | 6.41E-02 |
| rs12908891 | Whole_Blood | 15 | KIAA0101 | 64668539 | rs4776677   | 0.9921 | 64227044 | C | T | 0.51 | 1.54E-06 | 2.18E-02 | 3.73E-02 |
| rs12908891 | Whole_Blood | 15 | FBXL22   | 63892089 | rs11071777  | 0.8557 | 64229285 | C | G | 0.55 | 9.20E-06 | 3.44E-02 | 5.43E-02 |
| rs12908891 | Whole_Blood | 15 | KIAA0101 | 64668539 | rs11071777  | 0.8557 | 64229285 | C | G | 0.55 | 9.20E-06 | 1.27E-02 | 2.82E-02 |
| rs12908891 | Whole_Blood | 15 | FBXL22   | 63892089 | rs1563886   | 0.9272 | 64230852 | G | C | 0.49 | 8.06E-06 | 2.71E-02 | 6.68E-02 |
| rs12908891 | Whole_Blood | 15 | KIAA0101 | 64668539 | rs1563886   | 0.9272 | 64230852 | G | C | 0.49 | 8.06E-06 | 1.19E-02 | 4.59E-02 |
| rs12908891 | Whole_Blood | 15 | TPM1     | 63349472 | rs10744961  | 0.9960 | 64230930 | A | G | 0.51 | 1.86E-06 | 2.73E-02 | 4.41E-02 |
| rs12908891 | Whole_Blood | 15 | FBXL22   | 63892089 | rs10744961  | 0.9960 | 64230930 | A | G | 0.51 | 1.86E-06 | 2.98E-02 | 4.70E-02 |
| rs12908891 | Whole_Blood | 15 | KIAA0101 | 64668539 | rs10744961  | 0.9960 | 64230930 | A | G | 0.51 | 1.86E-06 | 4.89E-03 | 1.47E-02 |
| rs12908891 | Whole_Blood | 15 | TPM1     | 63349472 | rs6494454   | 0.8031 | 64233563 | A | C | 0.56 | 2.52E-05 | 1.63E-02 | 3.66E-02 |
| rs12908891 | Whole_Blood | 15 | KIAA0101 | 64668539 | rs6494454   | 0.8031 | 64233563 | A | C | 0.56 | 2.52E-05 | 4.43E-02 | 6.92E-02 |
| rs12908891 | Whole_Blood | 15 | TPM1     | 63349472 | rs894660    | 0.8031 | 64234334 | C | T | 0.56 | 2.52E-05 | 1.56E-02 | 3.57E-02 |
| rs12908891 | Whole_Blood | 15 | KIAA0101 | 64668539 | rs894660    | 0.8031 | 64234334 | C | T | 0.56 | 2.52E-05 | 4.35E-02 | 6.84E-02 |
| rs12908891 | Whole_Blood | 15 | TPM1     | 63349472 | rs4776266   | 0.8031 | 64236175 | G | T | 0.56 | 2.23E-05 | 2.46E-02 | 4.70E-02 |
| rs12908891 | Whole_Blood | 15 | KIAA0101 | 64668539 | rs4776266   | 0.8031 | 64236175 | G | T | 0.56 | 2.23E-05 | 1.95E-02 | 4.06E-02 |
| rs12908891 | Whole_Blood | 15 | TPM1     | 63349472 | rs4776268   | 1.0000 | 64236398 | A | G | 0.51 | 6.19E-06 | 1.88E-02 | 7.20E-02 |
| rs12908891 | Whole_Blood | 15 | FBXL22   | 63892089 | rs4776268   | 1.0000 | 64236398 | A | G | 0.51 | 6.19E-06 | 2.80E-02 | 8.39E-02 |
| rs12908891 | Whole_Blood | 15 | KIAA0101 | 64668539 | rs4776268   | 1.0000 | 64236398 | A | G | 0.51 | 6.19E-06 | 2.04E-02 | 7.41E-02 |
| rs12908891 | Whole_Blood | 15 | TPM1     | 63349472 | rs12908891  | 1.0000 | 64236441 | A | G | 0.52 | 1.39E-06 | 2.66E-02 | 4.30E-02 |
| rs12908891 | Whole_Blood | 15 | KIAA0101 | 64668539 | rs12908891  | 1.0000 | 64236441 | A | G | 0.52 | 1.39E-06 | 1.86E-02 | 3.35E-02 |
| rs12908891 | Whole_Blood | 15 | TPM1     | 63349472 | rs11071779  | 0.9881 | 64239044 | G | A | 0.51 | 1.57E-06 | 3.26E-02 | 5.04E-02 |
| rs12908891 | Whole_Blood | 15 | CA12     | 63643968 | rs11071779  | 0.9881 | 64239044 | G | A | 0.51 | 1.57E-06 | 2.64E-02 | 4.34E-02 |
| rs12908891 | Whole_Blood | 15 | DAPK2    | 64281733 | rs11071779  | 0.9881 | 64239044 | G | A | 0.51 | 1.57E-06 | 2.99E-02 | 4.73E-02 |
| rs12908891 | Whole_Blood | 15 | KIAA0101 | 64668539 | rs11071779  | 0.9881 | 64239044 | G | A | 0.51 | 1.57E-06 | 3.79E-03 | 1.28E-02 |
| rs12908891 | Whole_Blood | 15 | TPM1     | 63349472 | rs11071780  | 0.9842 | 64241691 | A | G | 0.51 | 4.74E-06 | 3.14E-02 | 9.07E-02 |
| rs12908891 | Whole_Blood | 15 | KIAA0101 | 64668539 | rs11071780  | 0.9842 | 64241691 | A | G | 0.51 | 4.74E-06 | 1.93E-02 | 7.52E-02 |
| rs12908891 | Whole_Blood | 15 | TPM1     | 63349472 | rs11854537  | 0.9842 | 64241733 | A | G | 0.51 | 4.74E-06 | 3.14E-02 | 9.07E-02 |
| rs12908891 | Whole_Blood | 15 | KIAA0101 | 64668539 | rs11854537  | 0.9842 | 64241733 | A | G | 0.51 | 4.74E-06 | 1.93E-02 | 7.52E-02 |
| rs12908891 | Whole_Blood | 15 | TPM1     | 63349472 | rs1380844   | 0.9881 | 64242007 | G | T | 0.51 | 4.74E-06 | 3.14E-02 | 9.07E-02 |
| rs12908891 | Whole_Blood | 15 | KIAA0101 | 64668539 | rs1380844   | 0.9881 | 64242007 | G | T | 0.51 | 4.74E-06 | 1.93E-02 | 7.52E-02 |
| rs12908891 | Whole_Blood | 15 | TPM1     | 63349472 | rs12916806  | 0.9881 | 64242770 | C | A | 0.51 | 4.64E-06 | 3.14E-02 | 9.07E-02 |
| rs12908891 | Whole_Blood | 15 | KIAA0101 | 64668539 | rs12916806  | 0.9881 | 64242770 | C | A | 0.51 | 4.64E-06 | 1.93E-02 | 7.52E-02 |
| rs12908891 | Whole_Blood | 15 | KIAA0101 | 64668539 | rs11071781  | 0.9195 | 64243933 | G | A | 0.49 | 4.75E-06 | 5.90E-03 | 3.61E-02 |
| rs12908891 | Whole_Blood | 15 | TPM1     | 63349472 | rs1304365   | 0.9881 | 64245946 | A | G | 0.51 | 4.67E-06 | 3.14E-02 | 9.07E-02 |
| rs12908891 | Whole_Blood | 15 | KIAA0101 | 64668539 | rs1304365   | 0.9881 | 64245946 | A | G | 0.51 | 4.67E-06 | 1.93E-02 | 7.53E-02 |
| rs12908891 | Whole_Blood | 15 | LACTB    | 63424129 | rs115415409 | 0.8420 | 64249559 | T | C | 0.45 | 1.45E-05 | 2.90E-02 | 5.47E-02 |

|            |                                      |    |                 |           |             |        |           |   |   |      |          |          |          |
|------------|--------------------------------------|----|-----------------|-----------|-------------|--------|-----------|---|---|------|----------|----------|----------|
| rs12908891 | Whole_Blood                          | 15 | <i>RPS27L</i>   | 63434145  | rs115415409 | 0.8420 | 64249559  | T | C | 0.45 | 1.45E-05 | 4.97E-02 | 7.74E-02 |
| rs12908891 | Whole_Blood                          | 15 | <i>CA12</i>     | 63643968  | rs115415409 | 0.8420 | 64249559  | T | C | 0.45 | 1.45E-05 | 4.54E-02 | 7.30E-02 |
| rs12908891 | Whole_Blood                          | 15 | <i>DAPK2</i>    | 64281733  | rs115415409 | 0.8420 | 64249559  | T | C | 0.45 | 1.45E-05 | 1.57E-02 | 3.80E-02 |
| rs12908891 | Whole_Blood                          | 15 | <i>FBXL22</i>   | 63892089  | rs145159458 | 0.9119 | 64252880  | T | C | 0.49 | 1.21E-05 | 4.23E-02 | 9.64E-02 |
| rs12908891 | Whole_Blood                          | 15 | <i>KIAA0101</i> | 64668539  | rs145159458 | 0.9119 | 64252880  | T | C | 0.49 | 1.21E-05 | 9.32E-03 | 5.30E-02 |
| rs12908891 | Whole_Blood                          | 15 | <i>TPM1</i>     | 63349472  | rs4776692   | 0.9881 | 64255083  | G | A | 0.50 | 1.06E-05 | 2.94E-02 | 9.75E-02 |
| rs12908891 | Whole_Blood                          | 15 | <i>KIAA0101</i> | 64668539  | rs4776692   | 0.9881 | 64255083  | G | A | 0.50 | 1.06E-05 | 1.47E-02 | 7.78E-02 |
| rs12908891 | Whole_Blood                          | 15 | <i>LACTB</i>    | 63424129  | rs28822416  | 0.8420 | 64257845  | C | T | 0.45 | 1.54E-05 | 4.15E-02 | 6.89E-02 |
| rs12908891 | Whole_Blood                          | 15 | <i>DAPK2</i>    | 64281733  | rs28822416  | 0.8420 | 64257845  | C | T | 0.45 | 1.54E-05 | 2.19E-02 | 4.63E-02 |
| rs12908891 | Whole_Blood                          | 15 | <i>KIAA0101</i> | 64668539  | rs28822416  | 0.8420 | 64257845  | C | T | 0.45 | 1.54E-05 | 2.47E-02 | 4.98E-02 |
| rs12908891 | Whole_Blood                          | 15 | <i>LACTB</i>    | 63424129  | rs8035776   | 0.8420 | 64258018  | G | A | 0.45 | 1.54E-05 | 4.63E-02 | 7.41E-02 |
| rs12908891 | Whole_Blood                          | 15 | <i>RPS27L</i>   | 63434145  | rs8035776   | 0.8420 | 64258018  | G | A | 0.45 | 1.54E-05 | 4.60E-02 | 7.38E-02 |
| rs12908891 | Whole_Blood                          | 15 | <i>DAPK2</i>    | 64281733  | rs8035776   | 0.8420 | 64258018  | G | A | 0.45 | 1.54E-05 | 2.21E-02 | 4.66E-02 |
| rs12908891 | Whole_Blood                          | 15 | <i>KIAA0101</i> | 64668539  | rs8035776   | 0.8420 | 64258018  | G | A | 0.45 | 1.54E-05 | 2.29E-02 | 4.76E-02 |
| rs12908891 | Whole_Blood                          | 15 | <i>LACTB</i>    | 63424129  | rs6494456   | 0.8381 | 64258260  | C | T | 0.45 | 1.54E-05 | 4.15E-02 | 6.89E-02 |
| rs12908891 | Whole_Blood                          | 15 | <i>DAPK2</i>    | 64281733  | rs6494456   | 0.8381 | 64258260  | C | T | 0.45 | 1.54E-05 | 2.19E-02 | 4.63E-02 |
| rs12908891 | Whole_Blood                          | 15 | <i>KIAA0101</i> | 64668539  | rs6494456   | 0.8381 | 64258260  | C | T | 0.45 | 1.54E-05 | 2.47E-02 | 4.98E-02 |
| rs12908891 | Whole_Blood                          | 15 | <i>DAPK2</i>    | 64281733  | rs4776695   | 0.8350 | 64259115  | T | C | 0.46 | 9.12E-06 | 4.36E-02 | 6.81E-02 |
| rs12908891 | Whole_Blood                          | 15 | <i>KIAA0101</i> | 64668539  | rs4776695   | 0.8350 | 64259115  | T | C | 0.46 | 9.12E-06 | 4.55E-02 | 7.01E-02 |
| rs7377304  | Brain_Amygdala                       | 4  | <i>KIAA1430</i> | 186105738 | rs7377304   | 1.0000 | 187129780 | G | T | 0.45 | 2.46E-06 | 2.21E-02 | 3.88E-02 |
| rs7377304  | Brain_Anterior_cingulate_cortex_BA24 | 4  | <i>SORBS2</i>   | 186692202 | rs7377304   | 1.0000 | 187129780 | G | T | 0.45 | 2.46E-06 | 3.88E-02 | 5.77E-02 |
| rs7377304  | Brain_Anterior_cingulate_cortex_BA24 | 4  | <i>FAM149A</i>  | 187059697 | rs7377304   | 1.0000 | 187129780 | G | T | 0.45 | 2.46E-06 | 1.35E-02 | 2.81E-02 |
| rs7377304  | Brain_Anterior_cingulate_cortex_BA24 | 4  | <i>F11</i>      | 187198967 | rs7377304   | 1.0000 | 187129780 | G | T | 0.45 | 2.46E-06 | 8.33E-03 | 2.08E-02 |
| rs7377304  | Brain_Anterior_cingulate_cortex_BA24 | 4  | <i>MTNR1A</i>   | 187465765 | rs7377304   | 1.0000 | 187129780 | G | T | 0.45 | 2.46E-06 | 1.51E-02 | 3.02E-02 |
| rs7377304  | Brain_Anterior_cingulate_cortex_BA24 | 4  | <i>SORBS2</i>   | 186692202 | rs1053094   | 1.0000 | 187133031 | T | A | 0.49 | 2.19E-03 | 4.37E-02 | 6.48E-02 |
| rs7377304  | Brain_Anterior_cingulate_cortex_BA24 | 4  | <i>FAM149A</i>  | 187059697 | rs1053094   | 1.0000 | 187133031 | T | A | 0.49 | 2.19E-03 | 1.94E-02 | 3.72E-02 |
| rs7377304  | Brain_Anterior_cingulate_cortex_BA24 | 4  | <i>F11</i>      | 187198967 | rs1053094   | 1.0000 | 187133031 | T | A | 0.49 | 2.19E-03 | 1.41E-02 | 3.05E-02 |
| rs7377304  | Brain_Anterior_cingulate_cortex_BA24 | 4  | <i>MTNR1A</i>   | 187465765 | rs1053094   | 1.0000 | 187133031 | T | A | 0.49 | 2.19E-03 | 1.55E-02 | 3.22E-02 |
| rs7377304  | Brain_Caudate_basal_ganglia          | 4  | <i>CYP4V2</i>   | 187123642 | rs7377304   | 1.0000 | 187129780 | G | T | 0.45 | 2.46E-06 | 1.48E-02 | 2.97E-02 |
| rs7377304  | Brain_Caudate_basal_ganglia          | 4  | <i>F11</i>      | 187198967 | rs7377304   | 1.0000 | 187129780 | G | T | 0.45 | 2.46E-06 | 2.71E-02 | 4.47E-02 |
| rs7377304  | Brain_Caudate_basal_ganglia          | 4  | <i>CYP4V2</i>   | 187123642 | rs1053094   | 1.0000 | 187133031 | T | A | 0.49 | 2.19E-03 | 1.69E-02 | 3.41E-02 |
| rs7377304  | Brain_Caudate_basal_ganglia          | 4  | <i>F11</i>      | 187198967 | rs1053094   | 1.0000 | 187133031 | T | A | 0.49 | 2.19E-03 | 3.70E-02 | 5.75E-02 |
| rs7377304  | Brain_Cerebellar_Hemisphere          | 4  | <i>C4orf47</i>  | 186359187 | rs7377304   | 1.0000 | 187129780 | G | T | 0.45 | 2.46E-06 | 2.02E-02 | 3.66E-02 |
| rs7377304  | Brain_Cerebellar_Hemisphere          | 4  | <i>C4orf47</i>  | 186359187 | rs1053094   | 1.0000 | 187133031 | T | A | 0.49 | 2.19E-03 | 1.60E-02 | 3.28E-02 |
| rs7377304  | Brain_Cerebellum                     | 4  | <i>UFSP2</i>    | 186333916 | rs7377304   | 1.0000 | 187129780 | G | T | 0.45 | 2.46E-06 | 4.55E-02 | 6.48E-02 |
| rs7377304  | Brain_Cerebellum                     | 4  | <i>PDLIM3</i>   | 186439808 | rs7377304   | 1.0000 | 187129780 | G | T | 0.45 | 2.46E-06 | 7.07E-03 | 1.88E-02 |
| rs7377304  | Brain_Cerebellum                     | 4  | <i>ORAOV1P1</i> | 187092214 | rs7377304   | 1.0000 | 187129780 | G | T | 0.45 | 2.46E-06 | 2.97E-02 | 4.77E-02 |
| rs7377304  | Brain_Cerebellum                     | 4  | <i>PDLIM3</i>   | 186439808 | rs1053094   | 1.0000 | 187133031 | T | A | 0.49 | 2.19E-03 | 9.19E-03 | 2.35E-02 |
| rs7377304  | Brain_Cerebellum                     | 4  | <i>ORAOV1P1</i> | 187092214 | rs1053094   | 1.0000 | 187133031 | T | A | 0.49 | 2.19E-03 | 3.21E-02 | 5.21E-02 |
| rs7377304  | Brain_Cortex                         | 4  | <i>F11</i>      | 187198967 | rs7377304   | 1.0000 | 187129780 | G | T | 0.45 | 2.46E-06 | 1.10E-05 | 1.19E-03 |

|            |                                       |    |               |           |            |        |           |   |   |      |          |          |          |
|------------|---------------------------------------|----|---------------|-----------|------------|--------|-----------|---|---|------|----------|----------|----------|
| rs7377304  | Brain_Cortex                          | 4  | F11           | 187198967 | rs1053094  | 1.0000 | 187133031 | T | A | 0.49 | 2.19E-03 | 9.31E-06 | 1.43E-03 |
| rs7377304  | Brain_Frontal_Cortex_BA9              | 4  | RP11-714G18.1 | 186302025 | rs7377304  | 1.0000 | 187129780 | G | T | 0.45 | 2.46E-06 | 2.27E-02 | 3.96E-02 |
| rs7377304  | Brain_Frontal_Cortex_BA9              | 4  | F11           | 187198967 | rs7377304  | 1.0000 | 187129780 | G | T | 0.45 | 2.46E-06 | 4.91E-02 | 6.87E-02 |
| rs7377304  | Brain_Frontal_Cortex_BA9              | 4  | RP11-714G18.1 | 186302025 | rs1053094  | 1.0000 | 187133031 | T | A | 0.49 | 2.19E-03 | 3.48E-02 | 5.52E-02 |
| rs7377304  | Brain_Hippocampus                     | 4  | F11           | 187198967 | rs7377304  | 1.0000 | 187129780 | G | T | 0.45 | 2.46E-06 | 2.85E-04 | 3.80E-03 |
| rs7377304  | Brain_Hippocampus                     | 4  | F11           | 187198967 | rs1053094  | 1.0000 | 187133031 | T | A | 0.49 | 2.19E-03 | 5.66E-04 | 5.83E-03 |
| rs7377304  | Brain_Hypothalamus                    | 4  | AC110771.1    | 187112269 | rs1053094  | 1.0000 | 187133031 | T | A | 0.49 | 2.19E-03 | 4.08E-02 | 6.17E-02 |
| rs7377304  | Brain_Nucleus_accumbens_basal_ganglia | 4  | CYP4V2        | 187123642 | rs7377304  | 1.0000 | 187129780 | G | T | 0.45 | 2.46E-06 | 2.81E-02 | 4.58E-02 |
| rs7377304  | Brain_Nucleus_accumbens_basal_ganglia | 4  | CYP4V2        | 187123642 | rs1053094  | 1.0000 | 187133031 | T | A | 0.49 | 2.19E-03 | 3.68E-02 | 5.74E-02 |
| rs7377304  | Brain_Putamen_basal_ganglia           | 4  | F11           | 187198967 | rs7377304  | 1.0000 | 187129780 | G | T | 0.45 | 2.46E-06 | 5.04E-03 | 1.55E-02 |
| rs7377304  | Brain_Putamen_basal_ganglia           | 4  | FAT1          | 187578406 | rs7377304  | 1.0000 | 187129780 | G | T | 0.45 | 2.46E-06 | 1.06E-02 | 2.40E-02 |
| rs7377304  | Brain_Putamen_basal_ganglia           | 4  | F11           | 187198967 | rs1053094  | 1.0000 | 187133031 | T | A | 0.49 | 2.19E-03 | 5.58E-03 | 1.77E-02 |
| rs7377304  | Brain_Putamen_basal_ganglia           | 4  | FAT1          | 187578406 | rs1053094  | 1.0000 | 187133031 | T | A | 0.49 | 2.19E-03 | 1.46E-02 | 3.11E-02 |
| rs7377304  | Brain_Spinal_cord_cervical_c-1        | 4  | TLR3          | 186999764 | rs7377304  | 1.0000 | 187129780 | G | T | 0.45 | 2.46E-06 | 4.35E-02 | 6.27E-02 |
| rs7377304  | Brain_Spinal_cord_cervical_c-1        | 4  | TLR3          | 186999764 | rs1053094  | 1.0000 | 187133031 | T | A | 0.49 | 2.19E-03 | 4.35E-02 | 6.45E-02 |
| rs7377304  | Brain_Substantia_nigra                | 4  | F11           | 187198967 | rs7377304  | 1.0000 | 187129780 | G | T | 0.45 | 2.46E-06 | 1.19E-02 | 2.59E-02 |
| rs7377304  | Brain_Substantia_nigra                | 4  | F11           | 187198967 | rs1053094  | 1.0000 | 187133031 | T | A | 0.49 | 2.19E-03 | 1.05E-02 | 2.54E-02 |
| rs7377304  | Whole_Blood                           | 4  | UFSP2         | 186333916 | rs7377304  | 1.0000 | 187129780 | G | T | 0.45 | 2.46E-06 | 3.65E-04 | 4.22E-03 |
| rs7377304  | Whole_Blood                           | 4  | UFSP2         | 186333916 | rs1053094  | 1.0000 | 187133031 | T | A | 0.49 | 2.19E-03 | 5.98E-04 | 5.97E-03 |
| rs55708341 | Brain_Amygdala                        | 21 | LINC00319     | 44870127  | rs59380543 | 0.9415 | 45617996  | T | C | 0.20 | 1.09E-05 | 4.09E-02 | 7.05E-02 |
| rs55708341 | Brain_Amygdala                        | 21 | AP001053.11   | 45229043  | rs59380543 | 0.9415 | 45617996  | T | C | 0.20 | 1.09E-05 | 4.74E-03 | 2.25E-02 |
| rs55708341 | Brain_Amygdala                        | 21 | AP001065.15   | 45907815  | rs59380543 | 0.9415 | 45617996  | T | C | 0.20 | 1.09E-05 | 4.68E-02 | 7.70E-02 |
| rs55708341 | Brain_Amygdala                        | 21 | SUMO3         | 46232113  | rs59380543 | 0.9415 | 45617996  | T | C | 0.20 | 1.09E-05 | 1.13E-02 | 3.40E-02 |
| rs55708341 | Brain_Amygdala                        | 21 | AP001053.11   | 45229043  | rs58139755 | 0.9415 | 45618128  | G | T | 0.20 | 2.00E-04 | 2.54E-02 | 7.51E-02 |
| rs55708341 | Brain_Amygdala                        | 21 | AP001065.15   | 45907815  | rs58139755 | 0.9415 | 45618128  | G | T | 0.20 | 2.00E-04 | 2.86E-02 | 7.90E-02 |
| rs55708341 | Brain_Amygdala                        | 21 | SUMO3         | 46232113  | rs58139755 | 0.9415 | 45618128  | G | T | 0.20 | 2.00E-04 | 1.65E-02 | 6.31E-02 |
| rs55708341 | Brain_Amygdala                        | 21 | LINC00319     | 44870127  | s113526534 | 0.9545 | 45621230  | A | G | 0.20 | 2.01E-05 | 4.41E-02 | 7.70E-02 |
| rs55708341 | Brain_Amygdala                        | 21 | AP001053.11   | 45229043  | s113526534 | 0.9545 | 45621230  | A | G | 0.20 | 2.01E-05 | 1.31E-02 | 3.93E-02 |
| rs55708341 | Brain_Amygdala                        | 21 | AP001065.15   | 45907815  | s113526534 | 0.9545 | 45621230  | A | G | 0.20 | 2.01E-05 | 3.07E-02 | 6.20E-02 |
| rs55708341 | Brain_Amygdala                        | 21 | SUMO3         | 46232113  | s113526534 | 0.9545 | 45621230  | A | G | 0.20 | 2.01E-05 | 1.69E-02 | 4.48E-02 |
| rs55708341 | Brain_Amygdala                        | 21 | LINC00319     | 44870127  | rs62228210 | 0.9545 | 45621292  | C | G | 0.20 | 2.01E-05 | 4.41E-02 | 7.70E-02 |
| rs55708341 | Brain_Amygdala                        | 21 | AP001053.11   | 45229043  | rs62228210 | 0.9545 | 45621292  | C | G | 0.20 | 2.01E-05 | 1.31E-02 | 3.93E-02 |
| rs55708341 | Brain_Amygdala                        | 21 | AP001065.15   | 45907815  | rs62228210 | 0.9545 | 45621292  | C | G | 0.20 | 2.01E-05 | 3.07E-02 | 6.20E-02 |
| rs55708341 | Brain_Amygdala                        | 21 | SUMO3         | 46232113  | rs62228210 | 0.9545 | 45621292  | C | G | 0.20 | 2.01E-05 | 1.69E-02 | 4.48E-02 |
| rs55708341 | Brain_Amygdala                        | 21 | AP001053.11   | 45229043  | rs6518350  | 0.9740 | 45621817  | G | A | 0.20 | 5.13E-06 | 2.53E-02 | 5.03E-02 |
| rs55708341 | Brain_Amygdala                        | 21 | AP001065.15   | 45907815  | rs6518350  | 0.9740 | 45621817  | G | A | 0.20 | 5.13E-06 | 4.66E-02 | 7.42E-02 |
| rs55708341 | Brain_Amygdala                        | 21 | SUMO3         | 46232113  | rs6518350  | 0.9740 | 45621817  | G | A | 0.20 | 5.13E-06 | 2.80E-02 | 5.35E-02 |
| rs55708341 | Brain_Amygdala                        | 21 | AP001053.11   | 45229043  | rs6518351  | 0.9740 | 45621939  | G | T | 0.20 | 3.98E-06 | 2.53E-02 | 4.97E-02 |
| rs55708341 | Brain_Amygdala                        | 21 | AP001065.15   | 45907815  | rs6518351  | 0.9740 | 45621939  | G | T | 0.20 | 3.98E-06 | 4.66E-02 | 7.36E-02 |
| rs55708341 | Brain_Amygdala                        | 21 | SUMO3         | 46232113  | rs6518351  | 0.9740 | 45621939  | G | T | 0.20 | 3.98E-06 | 2.80E-02 | 5.29E-02 |

|            |                                      |    |             |          |             |        |          |   |   |      |          |          |          |
|------------|--------------------------------------|----|-------------|----------|-------------|--------|----------|---|---|------|----------|----------|----------|
| rs55708341 | Brain_Amygdala                       | 21 | LINC00319   | 44870127 | rs56299324  | 0.9740 | 45622609 | G | A | 0.20 | 7.67E-06 | 4.54E-02 | 7.43E-02 |
| rs55708341 | Brain_Amygdala                       | 21 | AP001053.11 | 45229043 | rs56299324  | 0.9740 | 45622609 | G | A | 0.20 | 7.67E-06 | 3.20E-02 | 5.96E-02 |
| rs55708341 | Brain_Amygdala                       | 21 | LINC00319   | 44870127 | rs56132007  | 0.9740 | 45622705 | A | G | 0.20 | 6.83E-06 | 4.54E-02 | 7.40E-02 |
| rs55708341 | Brain_Amygdala                       | 21 | AP001053.11 | 45229043 | rs56132007  | 0.9740 | 45622705 | A | G | 0.20 | 6.83E-06 | 3.20E-02 | 5.93E-02 |
| rs55708341 | Brain_Amygdala                       | 21 | LINC00319   | 44870127 | rs55965762  | 0.9740 | 45622816 | T | A | 0.20 | 6.83E-06 | 4.54E-02 | 7.40E-02 |
| rs55708341 | Brain_Amygdala                       | 21 | AP001053.11 | 45229043 | rs55965762  | 0.9740 | 45622816 | T | A | 0.20 | 6.83E-06 | 3.20E-02 | 5.93E-02 |
| rs55708341 | Brain_Amygdala                       | 21 | LINC00319   | 44870127 | rs55736164  | 0.9804 | 45622925 | C | G | 0.20 | 6.83E-06 | 4.06E-02 | 6.88E-02 |
| rs55708341 | Brain_Amygdala                       | 21 | AP001053.11 | 45229043 | rs55736164  | 0.9804 | 45622925 | C | G | 0.20 | 6.83E-06 | 1.57E-02 | 3.91E-02 |
| rs55708341 | Brain_Amygdala                       | 21 | AP001053.11 | 45229043 | rs56178904  | 0.9740 | 45624551 | T | C | 0.20 | 7.10E-06 | 2.97E-02 | 5.69E-02 |
| rs55708341 | Brain_Amygdala                       | 21 | SUMO3       | 46232113 | rs56178904  | 0.9740 | 45624551 | T | C | 0.20 | 7.10E-06 | 4.00E-02 | 6.85E-02 |
| rs55708341 | Brain_Amygdala                       | 21 | AP001053.11 | 45229043 | rs3746959   | 0.9804 | 45625253 | A | G | 0.20 | 5.99E-06 | 2.51E-02 | 5.07E-02 |
| rs55708341 | Brain_Amygdala                       | 21 | SUMO3       | 46232113 | rs3746959   | 0.9804 | 45625253 | A | G | 0.20 | 5.99E-06 | 1.79E-02 | 4.17E-02 |
| rs55708341 | Brain_Amygdala                       | 21 | AP001053.11 | 45229043 | rs55708341  | 1.0000 | 45627581 | T | A | 0.20 | 2.51E-06 | 4.54E-02 | 7.10E-02 |
| rs55708341 | Brain_Amygdala                       | 21 | AP001053.11 | 45229043 | rs58911644  | 0.9869 | 45629121 | T | A | 0.20 | 2.96E-06 | 4.54E-02 | 7.17E-02 |
| rs55708341 | Brain_Anterior_cingulate_cortex_BA24 | 21 | CSTB        | 45194359 | rs59380543  | 0.9415 | 45617996 | T | C | 0.20 | 1.09E-05 | 3.10E-02 | 5.95E-02 |
| rs55708341 | Brain_Anterior_cingulate_cortex_BA24 | 21 | ITGB2-AS1   | 46345308 | rs59380543  | 0.9415 | 45617996 | T | C | 0.20 | 1.09E-05 | 4.57E-02 | 7.57E-02 |
| rs55708341 | Brain_Anterior_cingulate_cortex_BA24 | 21 | CSTB        | 45194359 | rs58139755  | 0.9415 | 45618128 | G | T | 0.20 | 2.00E-04 | 4.28E-02 | 9.51E-02 |
| rs55708341 | Brain_Anterior_cingulate_cortex_BA24 | 21 | RRP1        | 45217284 | rs58139755  | 0.9415 | 45618128 | G | T | 0.20 | 2.00E-04 | 3.70E-02 | 8.88E-02 |
| rs55708341 | Brain_Anterior_cingulate_cortex_BA24 | 21 | CSTB        | 45194359 | rs113526534 | 0.9545 | 45621230 | A | G | 0.20 | 2.01E-05 | 2.44E-02 | 5.44E-02 |
| rs55708341 | Brain_Anterior_cingulate_cortex_BA24 | 21 | RRP1        | 45217284 | rs113526534 | 0.9545 | 45621230 | A | G | 0.20 | 2.01E-05 | 9.24E-03 | 3.32E-02 |
| rs55708341 | Brain_Anterior_cingulate_cortex_BA24 | 21 | CSTB        | 45194359 | rs62228210  | 0.9545 | 45621292 | C | G | 0.20 | 2.01E-05 | 2.44E-02 | 5.44E-02 |
| rs55708341 | Brain_Anterior_cingulate_cortex_BA24 | 21 | RRP1        | 45217284 | rs62228210  | 0.9545 | 45621292 | C | G | 0.20 | 2.01E-05 | 9.24E-03 | 3.32E-02 |
| rs55708341 | Brain_Anterior_cingulate_cortex_BA24 | 21 | RRP1        | 45217284 | rs6518350   | 0.9740 | 45621817 | G | A | 0.20 | 5.13E-06 | 9.24E-03 | 2.86E-02 |
| rs55708341 | Brain_Anterior_cingulate_cortex_BA24 | 21 | RRP1        | 45217284 | rs6518351   | 0.9740 | 45621939 | G | T | 0.20 | 3.98E-06 | 9.24E-03 | 2.81E-02 |
| rs55708341 | Brain_Anterior_cingulate_cortex_BA24 | 21 | RRP1        | 45217284 | rs56299324  | 0.9740 | 45622609 | G | A | 0.20 | 7.67E-06 | 9.24E-03 | 2.98E-02 |
| rs55708341 | Brain_Anterior_cingulate_cortex_BA24 | 21 | RRP1        | 45217284 | rs56132007  | 0.9740 | 45622705 | A | G | 0.20 | 6.83E-06 | 9.24E-03 | 2.96E-02 |
| rs55708341 | Brain_Anterior_cingulate_cortex_BA24 | 21 | RRP1        | 45217284 | rs55965762  | 0.9740 | 45622816 | T | A | 0.20 | 6.83E-06 | 9.24E-03 | 2.96E-02 |
| rs55708341 | Brain_Anterior_cingulate_cortex_BA24 | 21 | RRP1        | 45217284 | rs55736164  | 0.9804 | 45622925 | C | G | 0.20 | 6.83E-06 | 1.34E-02 | 3.59E-02 |
| rs55708341 | Brain_Anterior_cingulate_cortex_BA24 | 21 | FAM207A     | 46378414 | rs55736164  | 0.9804 | 45622925 | C | G | 0.20 | 6.83E-06 | 4.85E-02 | 7.73E-02 |
| rs55708341 | Brain_Anterior_cingulate_cortex_BA24 | 21 | CSTB        | 45194359 | rs62228216  | 0.9804 | 45623518 | T | C | 0.20 | 6.83E-06 | 4.76E-02 | 7.64E-02 |
| rs55708341 | Brain_Anterior_cingulate_cortex_BA24 | 21 | RRP1        | 45217284 | rs62228216  | 0.9804 | 45623518 | T | C | 0.20 | 6.83E-06 | 5.65E-03 | 2.33E-02 |
| rs55708341 | Brain_Anterior_cingulate_cortex_BA24 | 21 | CSTB        | 45194359 | rs56178904  | 0.9740 | 45624551 | T | C | 0.20 | 7.10E-06 | 2.17E-02 | 4.72E-02 |
| rs55708341 | Brain_Anterior_cingulate_cortex_BA24 | 21 | RRP1        | 45217284 | rs56178904  | 0.9740 | 45624551 | T | C | 0.20 | 7.10E-06 | 5.59E-03 | 2.33E-02 |
| rs55708341 | Brain_Anterior_cingulate_cortex_BA24 | 21 | RRP1        | 45217284 | rs3746959   | 0.9804 | 45625253 | A | G | 0.20 | 5.99E-06 | 3.34E-02 | 6.04E-02 |
| rs55708341 | Brain_Anterior_cingulate_cortex_BA24 | 21 | CSTB        | 45194359 | rs55708341  | 1.0000 | 45627581 | T | A | 0.20 | 2.51E-06 | 3.97E-02 | 6.49E-02 |
| rs55708341 | Brain_Anterior_cingulate_cortex_BA24 | 21 | RRP1        | 45217284 | rs55708341  | 1.0000 | 45627581 | T | A | 0.20 | 2.51E-06 | 8.64E-03 | 2.61E-02 |
| rs55708341 | Brain_Anterior_cingulate_cortex_BA24 | 21 | CSTB        | 45194359 | rs58911644  | 0.9869 | 45629121 | T | A | 0.20 | 2.96E-06 | 3.97E-02 | 6.55E-02 |
| rs55708341 | Brain_Anterior_cingulate_cortex_BA24 | 21 | RRP1        | 45217284 | rs58911644  | 0.9869 | 45629121 | T | A | 0.20 | 2.96E-06 | 8.64E-03 | 2.67E-02 |
| rs55708341 | Brain_Caudate_basal_ganglia          | 21 | TRAPPC10    | 45479316 | rs59380543  | 0.9415 | 45617996 | T | C | 0.20 | 1.09E-05 | 1.86E-02 | 4.43E-02 |
| rs55708341 | Brain_Caudate_basal_ganglia          | 21 | UBE2G2      | 46205444 | rs59380543  | 0.9415 | 45617996 | T | C | 0.20 | 1.09E-05 | 1.02E-02 | 3.23E-02 |

|            |                             |    |            |          |             |        |          |   |   |      |          |          |          |
|------------|-----------------------------|----|------------|----------|-------------|--------|----------|---|---|------|----------|----------|----------|
| rs55708341 | Brain_Caudate_basal_ganglia | 21 | TRAPPC10   | 45479316 | rs58139755  | 0.9415 | 45618128 | G | T | 0.20 | 2.00E-04 | 4.21E-02 | 9.45E-02 |
| rs55708341 | Brain_Caudate_basal_ganglia | 21 | UBE2G2     | 46205444 | rs58139755  | 0.9415 | 45618128 | G | T | 0.20 | 2.00E-04 | 4.63E-02 | 9.89E-02 |
| rs55708341 | Brain_Caudate_basal_ganglia | 21 | TRAPPC10   | 45479316 | rs113526534 | 0.9545 | 45621230 | A | G | 0.20 | 2.01E-05 | 4.33E-02 | 7.61E-02 |
| rs55708341 | Brain_Caudate_basal_ganglia | 21 | UBE2G2     | 46205444 | rs113526534 | 0.9545 | 45621230 | A | G | 0.20 | 2.01E-05 | 3.05E-02 | 6.18E-02 |
| rs55708341 | Brain_Caudate_basal_ganglia | 21 | TRAPPC10   | 45479316 | rs62228210  | 0.9545 | 45621292 | C | G | 0.20 | 2.01E-05 | 3.29E-02 | 6.45E-02 |
| rs55708341 | Brain_Caudate_basal_ganglia | 21 | UBE2G2     | 46205444 | rs62228210  | 0.9545 | 45621292 | C | G | 0.20 | 2.01E-05 | 3.84E-02 | 7.08E-02 |
| rs55708341 | Brain_Caudate_basal_ganglia | 21 | TRAPPC10   | 45479316 | rs6518350   | 0.9740 | 45621817 | G | A | 0.20 | 5.13E-06 | 3.14E-02 | 5.74E-02 |
| rs55708341 | Brain_Caudate_basal_ganglia | 21 | TRAPPC10   | 45479316 | rs6518351   | 0.9740 | 45621939 | G | T | 0.20 | 3.98E-06 | 3.14E-02 | 5.68E-02 |
| rs55708341 | Brain_Caudate_basal_ganglia | 21 | TRAPPC10   | 45479316 | rs56299324  | 0.9740 | 45622609 | G | A | 0.20 | 7.67E-06 | 3.14E-02 | 5.88E-02 |
| rs55708341 | Brain_Caudate_basal_ganglia | 21 | TRAPPC10   | 45479316 | rs56132007  | 0.9740 | 45622705 | A | G | 0.20 | 6.83E-06 | 3.14E-02 | 5.86E-02 |
| rs55708341 | Brain_Caudate_basal_ganglia | 21 | TRAPPC10   | 45479316 | rs55965762  | 0.9740 | 45622816 | T | A | 0.20 | 6.83E-06 | 3.14E-02 | 5.86E-02 |
| rs55708341 | Brain_Caudate_basal_ganglia | 21 | TRAPPC10   | 45479316 | rs55736164  | 0.9804 | 45622925 | C | G | 0.20 | 6.83E-06 | 3.79E-02 | 6.59E-02 |
| rs55708341 | Brain_Caudate_basal_ganglia | 21 | UBE2G2     | 46205444 | rs55736164  | 0.9804 | 45622925 | C | G | 0.20 | 6.83E-06 | 4.16E-02 | 7.00E-02 |
| rs55708341 | Brain_Caudate_basal_ganglia | 21 | TRAPPC10   | 45479316 | rs62228216  | 0.9804 | 45623518 | T | C | 0.20 | 6.83E-06 | 3.64E-02 | 6.42E-02 |
| rs55708341 | Brain_Caudate_basal_ganglia | 21 | TRAPPC10   | 45479316 | rs56178904  | 0.9740 | 45624551 | T | C | 0.20 | 7.10E-06 | 3.82E-02 | 6.64E-02 |
| rs55708341 | Brain_Caudate_basal_ganglia | 21 | UBE2G2     | 46205444 | rs56178904  | 0.9740 | 45624551 | T | C | 0.20 | 7.10E-06 | 4.66E-02 | 7.55E-02 |
| rs55708341 | Brain_Caudate_basal_ganglia | 21 | TRAPPC10   | 45479316 | rs3746959   | 0.9804 | 45625253 | A | G | 0.20 | 5.99E-06 | 3.08E-02 | 5.75E-02 |
| rs55708341 | Brain_Caudate_basal_ganglia | 21 | AP001058.3 | 45626845 | rs3746959   | 0.9804 | 45625253 | A | G | 0.20 | 5.99E-06 | 4.20E-02 | 6.99E-02 |
| rs55708341 | Brain_Caudate_basal_ganglia | 21 | MTND5P1    | 45894301 | rs3746959   | 0.9804 | 45625253 | A | G | 0.20 | 5.99E-06 | 2.65E-02 | 5.25E-02 |
| rs55708341 | Brain_Caudate_basal_ganglia | 21 | TRAPPC10   | 45479316 | rs55708341  | 1.0000 | 45627581 | T | A | 0.20 | 2.51E-06 | 2.90E-02 | 5.29E-02 |
| rs55708341 | Brain_Caudate_basal_ganglia | 21 | UBE2G2     | 46205444 | rs55708341  | 1.0000 | 45627581 | T | A | 0.20 | 2.51E-06 | 3.66E-02 | 6.15E-02 |
| rs55708341 | Brain_Caudate_basal_ganglia | 21 | TRAPPC10   | 45479316 | rs58911644  | 0.9869 | 45629121 | T | A | 0.20 | 2.96E-06 | 2.90E-02 | 5.35E-02 |
| rs55708341 | Brain_Caudate_basal_ganglia | 21 | UBE2G2     | 46205444 | rs58911644  | 0.9869 | 45629121 | T | A | 0.20 | 2.96E-06 | 3.66E-02 | 6.22E-02 |
| rs55708341 | Brain_Cerebellar_Hemisphere | 21 | RRP1B      | 45097693 | rs59380543  | 0.9415 | 45617996 | T | C | 0.20 | 1.09E-05 | 6.26E-03 | 2.55E-02 |
| rs55708341 | Brain_Cerebellar_Hemisphere | 21 | AP001055.6 | 45579291 | rs59380543  | 0.9415 | 45617996 | T | C | 0.20 | 1.09E-05 | 1.19E-02 | 3.49E-02 |
| rs55708341 | Brain_Cerebellar_Hemisphere | 21 | RRP1       | 45217284 | rs58139755  | 0.9415 | 45618128 | G | T | 0.20 | 2.00E-04 | 1.85E-02 | 6.59E-02 |
| rs55708341 | Brain_Cerebellar_Hemisphere | 21 | AP001055.6 | 45579291 | rs58139755  | 0.9415 | 45618128 | G | T | 0.20 | 2.00E-04 | 2.81E-03 | 3.60E-02 |
| rs55708341 | Brain_Cerebellar_Hemisphere | 21 | AP001058.3 | 45626845 | rs58139755  | 0.9415 | 45618128 | G | T | 0.20 | 2.00E-04 | 2.13E-02 | 6.98E-02 |
| rs55708341 | Brain_Cerebellar_Hemisphere | 21 | RRP1       | 45217284 | rs113526534 | 0.9545 | 45621230 | A | G | 0.20 | 2.01E-05 | 3.67E-02 | 6.88E-02 |
| rs55708341 | Brain_Cerebellar_Hemisphere | 21 | AP001055.6 | 45579291 | rs113526534 | 0.9545 | 45621230 | A | G | 0.20 | 2.01E-05 | 1.00E-02 | 3.45E-02 |
| rs55708341 | Brain_Cerebellar_Hemisphere | 21 | AP001058.3 | 45626845 | rs113526534 | 0.9545 | 45621230 | A | G | 0.20 | 2.01E-05 | 2.69E-02 | 5.75E-02 |
| rs55708341 | Brain_Cerebellar_Hemisphere | 21 | RRP1       | 45217284 | rs62228210  | 0.9545 | 45621292 | C | G | 0.20 | 2.01E-05 | 3.67E-02 | 6.88E-02 |
| rs55708341 | Brain_Cerebellar_Hemisphere | 21 | AP001055.6 | 45579291 | rs62228210  | 0.9545 | 45621292 | C | G | 0.20 | 2.01E-05 | 1.00E-02 | 3.45E-02 |
| rs55708341 | Brain_Cerebellar_Hemisphere | 21 | AP001058.3 | 45626845 | rs62228210  | 0.9545 | 45621292 | C | G | 0.20 | 2.01E-05 | 2.69E-02 | 5.75E-02 |
| rs55708341 | Brain_Cerebellar_Hemisphere | 21 | RRP1       | 45217284 | rs6518350   | 0.9740 | 45621817 | G | A | 0.20 | 5.13E-06 | 2.90E-02 | 5.47E-02 |
| rs55708341 | Brain_Cerebellar_Hemisphere | 21 | AP001055.6 | 45579291 | rs6518350   | 0.9740 | 45621817 | G | A | 0.20 | 5.13E-06 | 9.82E-03 | 2.95E-02 |
| rs55708341 | Brain_Cerebellar_Hemisphere | 21 | AP001055.1 | 45590699 | rs6518350   | 0.9740 | 45621817 | G | A | 0.20 | 5.13E-06 | 3.80E-02 | 6.49E-02 |
| rs55708341 | Brain_Cerebellar_Hemisphere | 21 | AP001058.3 | 45626845 | rs6518350   | 0.9740 | 45621817 | G | A | 0.20 | 5.13E-06 | 3.17E-02 | 5.78E-02 |
| rs55708341 | Brain_Cerebellar_Hemisphere | 21 | RRP1       | 45217284 | rs6518351   | 0.9740 | 45621939 | G | T | 0.20 | 3.98E-06 | 2.90E-02 | 5.41E-02 |
| rs55708341 | Brain_Cerebellar_Hemisphere | 21 | AP001055.6 | 45579291 | rs6518351   | 0.9740 | 45621939 | G | T | 0.20 | 3.98E-06 | 9.82E-03 | 2.90E-02 |

|            |                             |    |                   |          |             |        |          |   |   |      |          |          |          |
|------------|-----------------------------|----|-------------------|----------|-------------|--------|----------|---|---|------|----------|----------|----------|
| rs55708341 | Brain_Cerebellar_Hemisphere | 21 | <i>AP001055.1</i> | 45590699 | rs6518351   | 0.9740 | 45621939 | G | T | 0.20 | 3.98E-06 | 3.80E-02 | 6.43E-02 |
| rs55708341 | Brain_Cerebellar_Hemisphere | 21 | <i>AP001058.3</i> | 45626845 | rs6518351   | 0.9740 | 45621939 | G | T | 0.20 | 3.98E-06 | 3.17E-02 | 5.72E-02 |
| rs55708341 | Brain_Cerebellar_Hemisphere | 21 | <i>RRP1</i>       | 45217284 | rs56299324  | 0.9740 | 45622609 | G | A | 0.20 | 7.67E-06 | 2.90E-02 | 5.61E-02 |
| rs55708341 | Brain_Cerebellar_Hemisphere | 21 | <i>AP001055.6</i> | 45579291 | rs56299324  | 0.9740 | 45622609 | G | A | 0.20 | 7.67E-06 | 9.82E-03 | 3.07E-02 |
| rs55708341 | Brain_Cerebellar_Hemisphere | 21 | <i>AP001055.1</i> | 45590699 | rs56299324  | 0.9740 | 45622609 | G | A | 0.20 | 7.67E-06 | 3.80E-02 | 6.63E-02 |
| rs55708341 | Brain_Cerebellar_Hemisphere | 21 | <i>AP001058.3</i> | 45626845 | rs56299324  | 0.9740 | 45622609 | G | A | 0.20 | 7.67E-06 | 3.17E-02 | 5.92E-02 |
| rs55708341 | Brain_Cerebellar_Hemisphere | 21 | <i>RRP1</i>       | 45217284 | rs56132007  | 0.9740 | 45622705 | A | G | 0.20 | 6.83E-06 | 2.90E-02 | 5.58E-02 |
| rs55708341 | Brain_Cerebellar_Hemisphere | 21 | <i>AP001055.6</i> | 45579291 | rs56132007  | 0.9740 | 45622705 | A | G | 0.20 | 6.83E-06 | 9.82E-03 | 3.05E-02 |
| rs55708341 | Brain_Cerebellar_Hemisphere | 21 | <i>AP001055.1</i> | 45590699 | rs56132007  | 0.9740 | 45622705 | A | G | 0.20 | 6.83E-06 | 3.80E-02 | 6.60E-02 |
| rs55708341 | Brain_Cerebellar_Hemisphere | 21 | <i>AP001058.3</i> | 45626845 | rs56132007  | 0.9740 | 45622705 | A | G | 0.20 | 6.83E-06 | 3.17E-02 | 5.90E-02 |
| rs55708341 | Brain_Cerebellar_Hemisphere | 21 | <i>RRP1</i>       | 45217284 | rs55965762  | 0.9740 | 45622816 | T | A | 0.20 | 6.83E-06 | 2.90E-02 | 5.58E-02 |
| rs55708341 | Brain_Cerebellar_Hemisphere | 21 | <i>AP001055.6</i> | 45579291 | rs55965762  | 0.9740 | 45622816 | T | A | 0.20 | 6.83E-06 | 9.82E-03 | 3.05E-02 |
| rs55708341 | Brain_Cerebellar_Hemisphere | 21 | <i>AP001055.1</i> | 45590699 | rs55965762  | 0.9740 | 45622816 | T | A | 0.20 | 6.83E-06 | 3.80E-02 | 6.60E-02 |
| rs55708341 | Brain_Cerebellar_Hemisphere | 21 | <i>AP001058.3</i> | 45626845 | rs55965762  | 0.9740 | 45622816 | T | A | 0.20 | 6.83E-06 | 3.17E-02 | 5.90E-02 |
| rs55708341 | Brain_Cerebellar_Hemisphere | 21 | <i>RRP1</i>       | 45217284 | rs55736164  | 0.9804 | 45622925 | C | G | 0.20 | 6.83E-06 | 2.90E-02 | 5.58E-02 |
| rs55708341 | Brain_Cerebellar_Hemisphere | 21 | <i>AP001055.6</i> | 45579291 | rs55736164  | 0.9804 | 45622925 | C | G | 0.20 | 6.83E-06 | 9.82E-03 | 3.05E-02 |
| rs55708341 | Brain_Cerebellar_Hemisphere | 21 | <i>AP001055.1</i> | 45590699 | rs55736164  | 0.9804 | 45622925 | C | G | 0.20 | 6.83E-06 | 3.80E-02 | 6.60E-02 |
| rs55708341 | Brain_Cerebellar_Hemisphere | 21 | <i>AP001058.3</i> | 45626845 | rs55736164  | 0.9804 | 45622925 | C | G | 0.20 | 6.83E-06 | 3.17E-02 | 5.90E-02 |
| rs55708341 | Brain_Cerebellar_Hemisphere | 21 | <i>RRP1</i>       | 45217284 | rs62228216  | 0.9804 | 45623518 | T | C | 0.20 | 6.83E-06 | 1.99E-02 | 4.47E-02 |
| rs55708341 | Brain_Cerebellar_Hemisphere | 21 | <i>AP001055.6</i> | 45579291 | rs62228216  | 0.9804 | 45623518 | T | C | 0.20 | 6.83E-06 | 7.28E-03 | 2.63E-02 |
| rs55708341 | Brain_Cerebellar_Hemisphere | 21 | <i>AP001055.1</i> | 45590699 | rs62228216  | 0.9804 | 45623518 | T | C | 0.20 | 6.83E-06 | 3.63E-02 | 6.41E-02 |
| rs55708341 | Brain_Cerebellar_Hemisphere | 21 | <i>AP001058.3</i> | 45626845 | rs62228216  | 0.9804 | 45623518 | T | C | 0.20 | 6.83E-06 | 2.18E-02 | 4.71E-02 |
| rs55708341 | Brain_Cerebellar_Hemisphere | 21 | <i>RRP1B</i>      | 45097693 | rs56178904  | 0.9740 | 45624551 | T | C | 0.20 | 7.10E-06 | 4.42E-02 | 7.29E-02 |
| rs55708341 | Brain_Cerebellar_Hemisphere | 21 | <i>CSTB</i>       | 45194359 | rs56178904  | 0.9740 | 45624551 | T | C | 0.20 | 7.10E-06 | 4.60E-02 | 7.50E-02 |
| rs55708341 | Brain_Cerebellar_Hemisphere | 21 | <i>RRP1</i>       | 45217284 | rs56178904  | 0.9740 | 45624551 | T | C | 0.20 | 7.10E-06 | 2.55E-02 | 5.18E-02 |
| rs55708341 | Brain_Cerebellar_Hemisphere | 21 | <i>AP001055.6</i> | 45579291 | rs56178904  | 0.9740 | 45624551 | T | C | 0.20 | 7.10E-06 | 7.44E-03 | 2.67E-02 |
| rs55708341 | Brain_Cerebellar_Hemisphere | 21 | <i>AP001058.3</i> | 45626845 | rs56178904  | 0.9740 | 45624551 | T | C | 0.20 | 7.10E-06 | 1.83E-02 | 4.28E-02 |
| rs55708341 | Brain_Cerebellar_Hemisphere | 21 | <i>RRP1B</i>      | 45097693 | rs3746959   | 0.9804 | 45625253 | A | G | 0.20 | 5.99E-06 | 1.12E-02 | 3.23E-02 |
| rs55708341 | Brain_Cerebellar_Hemisphere | 21 | <i>AP001055.6</i> | 45579291 | rs3746959   | 0.9804 | 45625253 | A | G | 0.20 | 5.99E-06 | 2.79E-02 | 5.41E-02 |
| rs55708341 | Brain_Cerebellar_Hemisphere | 21 | <i>MTND5P1</i>    | 45894301 | rs3746959   | 0.9804 | 45625253 | A | G | 0.20 | 5.99E-06 | 4.27E-02 | 7.07E-02 |
| rs55708341 | Brain_Cerebellar_Hemisphere | 21 | <i>RRP1B</i>      | 45097693 | rs55708341  | 1.0000 | 45627581 | T | A | 0.20 | 2.51E-06 | 2.72E-02 | 5.08E-02 |
| rs55708341 | Brain_Cerebellar_Hemisphere | 21 | <i>CSTB</i>       | 45194359 | rs55708341  | 1.0000 | 45627581 | T | A | 0.20 | 2.51E-06 | 4.25E-02 | 6.79E-02 |
| rs55708341 | Brain_Cerebellar_Hemisphere | 21 | <i>AP001055.6</i> | 45579291 | rs55708341  | 1.0000 | 45627581 | T | A | 0.20 | 2.51E-06 | 1.11E-02 | 2.99E-02 |
| rs55708341 | Brain_Cerebellar_Hemisphere | 21 | <i>AP001058.3</i> | 45626845 | rs55708341  | 1.0000 | 45627581 | T | A | 0.20 | 2.51E-06 | 3.48E-02 | 5.95E-02 |
| rs55708341 | Brain_Cerebellar_Hemisphere | 21 | <i>RRP1B</i>      | 45097693 | rs58911644  | 0.9869 | 45629121 | T | A | 0.20 | 2.96E-06 | 2.72E-02 | 5.14E-02 |
| rs55708341 | Brain_Cerebellar_Hemisphere | 21 | <i>CSTB</i>       | 45194359 | rs58911644  | 0.9869 | 45629121 | T | A | 0.20 | 2.96E-06 | 4.25E-02 | 6.86E-02 |
| rs55708341 | Brain_Cerebellar_Hemisphere | 21 | <i>AP001055.6</i> | 45579291 | rs58911644  | 0.9869 | 45629121 | T | A | 0.20 | 2.96E-06 | 1.11E-02 | 3.05E-02 |
| rs55708341 | Brain_Cerebellar_Hemisphere | 21 | <i>AP001058.3</i> | 45626845 | rs58911644  | 0.9869 | 45629121 | T | A | 0.20 | 2.96E-06 | 3.48E-02 | 6.01E-02 |
| rs55708341 | Brain_Cerebellum            | 21 | <i>C21orf67</i>   | 46356278 | rs58139755  | 0.9415 | 45618128 | G | T | 0.20 | 2.00E-04 | 4.09E-02 | 9.31E-02 |
| rs55708341 | Brain_Cerebellum            | 21 | <i>C21orf67</i>   | 46356278 | rs113526534 | 0.9545 | 45621230 | A | G | 0.20 | 2.01E-05 | 4.28E-02 | 7.55E-02 |



|            |                  |    |                        |          |             |        |          |   |   |      |          |          |          |
|------------|------------------|----|------------------------|----------|-------------|--------|----------|---|---|------|----------|----------|----------|
| rs55708341 | Brain_Cerebellum | 21 | <i>C21orf67</i>        | 46356278 | rs62228210  | 0.9545 | 45621292 | C | G | 0.20 | 2.01E-05 | 4.28E-02 | 7.55E-02 |
| rs55708341 | Brain_Cerebellum | 21 | <i>C21orf67</i>        | 46356278 | rs6518350   | 0.9740 | 45621817 | G | A | 0.20 | 5.13E-06 | 1.23E-02 | 3.33E-02 |
| rs55708341 | Brain_Cerebellum | 21 | <i>C21orf67</i>        | 46356278 | rs6518351   | 0.9740 | 45621939 | G | T | 0.20 | 3.98E-06 | 1.23E-02 | 3.28E-02 |
| rs55708341 | Brain_Cerebellum | 21 | <i>PFKL</i>            | 45733596 | rs56299324  | 0.9740 | 45622609 | G | A | 0.20 | 7.67E-06 | 4.72E-02 | 7.62E-02 |
| rs55708341 | Brain_Cerebellum | 21 | <i>C21orf67</i>        | 46356278 | rs56299324  | 0.9740 | 45622609 | G | A | 0.20 | 7.67E-06 | 1.36E-02 | 3.64E-02 |
| rs55708341 | Brain_Cerebellum | 21 | <i>PFKL</i>            | 45733596 | rs56132007  | 0.9740 | 45622705 | A | G | 0.20 | 6.83E-06 | 4.72E-02 | 7.60E-02 |
| rs55708341 | Brain_Cerebellum | 21 | <i>C21orf67</i>        | 46356278 | rs56132007  | 0.9740 | 45622705 | A | G | 0.20 | 6.83E-06 | 1.36E-02 | 3.61E-02 |
| rs55708341 | Brain_Cerebellum | 21 | <i>PFKL</i>            | 45733596 | rs55965762  | 0.9740 | 45622816 | T | A | 0.20 | 6.83E-06 | 4.72E-02 | 7.60E-02 |
| rs55708341 | Brain_Cerebellum | 21 | <i>C21orf67</i>        | 46356278 | rs55965762  | 0.9740 | 45622816 | T | A | 0.20 | 6.83E-06 | 1.36E-02 | 3.61E-02 |
| rs55708341 | Brain_Cerebellum | 21 | <i>C21orf67</i>        | 46356278 | rs55736164  | 0.9804 | 45622925 | C | G | 0.20 | 6.83E-06 | 9.34E-03 | 2.97E-02 |
| rs55708341 | Brain_Cerebellum | 21 | <i>C21orf67</i>        | 46356278 | rs62228216  | 0.9804 | 45623518 | T | C | 0.20 | 6.83E-06 | 9.79E-03 | 3.05E-02 |
| rs55708341 | Brain_Cerebellum | 21 | <i>C21orf67</i>        | 46356278 | rs56178904  | 0.9740 | 45624551 | T | C | 0.20 | 7.10E-06 | 3.47E-02 | 6.25E-02 |
| rs55708341 | Brain_Cerebellum | 21 | <i>C21orf67</i>        | 46356278 | rs3746959   | 0.9804 | 45625253 | A | G | 0.20 | 5.99E-06 | 3.03E-02 | 5.69E-02 |
| rs55708341 | Brain_Cerebellum | 21 | <i>C21orf67</i>        | 46356278 | rs55708341  | 1.0000 | 45627581 | T | A | 0.20 | 2.51E-06 | 2.07E-02 | 4.29E-02 |
| rs55708341 | Brain_Cerebellum | 21 | <i>C21orf67</i>        | 46356278 | rs58911644  | 0.9869 | 45629121 | T | A | 0.20 | 2.96E-06 | 2.07E-02 | 4.35E-02 |
| rs55708341 | Brain_Cortex     | 21 | <i>RRP1</i>            | 45217284 | rs59380543  | 0.9415 | 45617996 | T | C | 0.20 | 1.09E-05 | 3.07E-02 | 5.91E-02 |
| rs55708341 | Brain_Cortex     | 21 | <i>AP001055.1</i>      | 45590699 | rs59380543  | 0.9415 | 45617996 | T | C | 0.20 | 1.09E-05 | 3.56E-02 | 6.48E-02 |
| rs55708341 | Brain_Cortex     | 21 | <i>TSPEAR-AS1</i>      | 45931214 | rs59380543  | 0.9415 | 45617996 | T | C | 0.20 | 1.09E-05 | 3.59E-02 | 6.51E-02 |
| rs55708341 | Brain_Cortex     | 21 | <i>LL21NC02-1C16.1</i> | 46349810 | rs59380543  | 0.9415 | 45617996 | T | C | 0.20 | 1.09E-05 | 2.33E-02 | 5.03E-02 |
| rs55708341 | Brain_Cortex     | 21 | <i>AP001055.1</i>      | 45590699 | rs58139755  | 0.9415 | 45618128 | G | T | 0.20 | 2.00E-04 | 3.98E-02 | 9.19E-02 |
| rs55708341 | Brain_Cortex     | 21 | <i>LL21NC02-1C16.1</i> | 46349810 | rs58139755  | 0.9415 | 45618128 | G | T | 0.20 | 2.00E-04 | 1.16E-02 | 5.54E-02 |
| rs55708341 | Brain_Cortex     | 21 | <i>RRP1</i>            | 45217284 | rs113526534 | 0.9545 | 45621230 | A | G | 0.20 | 2.01E-05 | 3.84E-02 | 7.08E-02 |
| rs55708341 | Brain_Cortex     | 21 | <i>AP001055.1</i>      | 45590699 | rs113526534 | 0.9545 | 45621230 | A | G | 0.20 | 2.01E-05 | 2.58E-02 | 5.62E-02 |
| rs55708341 | Brain_Cortex     | 21 | <i>LL21NC02-1C16.1</i> | 46349810 | rs113526534 | 0.9545 | 45621230 | A | G | 0.20 | 2.01E-05 | 9.31E-03 | 3.33E-02 |
| rs55708341 | Brain_Cortex     | 21 | <i>RRP1</i>            | 45217284 | rs62228210  | 0.9545 | 45621292 | C | G | 0.20 | 2.01E-05 | 3.84E-02 | 7.08E-02 |
| rs55708341 | Brain_Cortex     | 21 | <i>AP001055.1</i>      | 45590699 | rs62228210  | 0.9545 | 45621292 | C | G | 0.20 | 2.01E-05 | 2.58E-02 | 5.62E-02 |
| rs55708341 | Brain_Cortex     | 21 | <i>LL21NC02-1C16.1</i> | 46349810 | rs62228210  | 0.9545 | 45621292 | C | G | 0.20 | 2.01E-05 | 9.31E-03 | 3.33E-02 |
| rs55708341 | Brain_Cortex     | 21 | <i>RRP1</i>            | 45217284 | rs6518350   | 0.9740 | 45621817 | G | A | 0.20 | 5.13E-06 | 3.75E-02 | 6.43E-02 |
| rs55708341 | Brain_Cortex     | 21 | <i>AP001055.1</i>      | 45590699 | rs6518350   | 0.9740 | 45621817 | G | A | 0.20 | 5.13E-06 | 2.19E-02 | 4.61E-02 |
| rs55708341 | Brain_Cortex     | 21 | <i>LL21NC02-1C16.1</i> | 46349810 | rs6518350   | 0.9740 | 45621817 | G | A | 0.20 | 5.13E-06 | 1.00E-02 | 2.98E-02 |
| rs55708341 | Brain_Cortex     | 21 | <i>RRP1</i>            | 45217284 | rs6518351   | 0.9740 | 45621939 | G | T | 0.20 | 3.98E-06 | 3.75E-02 | 6.37E-02 |
| rs55708341 | Brain_Cortex     | 21 | <i>AP001055.1</i>      | 45590699 | rs6518351   | 0.9740 | 45621939 | G | T | 0.20 | 3.98E-06 | 2.19E-02 | 4.55E-02 |
| rs55708341 | Brain_Cortex     | 21 | <i>LL21NC02-1C16.1</i> | 46349810 | rs6518351   | 0.9740 | 45621939 | G | T | 0.20 | 3.98E-06 | 1.00E-02 | 2.93E-02 |
| rs55708341 | Brain_Cortex     | 21 | <i>RRP1</i>            | 45217284 | rs56299324  | 0.9740 | 45622609 | G | A | 0.20 | 7.67E-06 | 4.62E-02 | 7.51E-02 |
| rs55708341 | Brain_Cortex     | 21 | <i>AP001055.1</i>      | 45590699 | rs56299324  | 0.9740 | 45622609 | G | A | 0.20 | 7.67E-06 | 3.90E-02 | 6.74E-02 |
| rs55708341 | Brain_Cortex     | 21 | <i>LL21NC02-1C16.1</i> | 46349810 | rs56299324  | 0.9740 | 45622609 | G | A | 0.20 | 7.67E-06 | 8.75E-03 | 2.90E-02 |
| rs55708341 | Brain_Cortex     | 21 | <i>RRP1</i>            | 45217284 | rs56132007  | 0.9740 | 45622705 | A | G | 0.20 | 6.83E-06 | 4.62E-02 | 7.49E-02 |
| rs55708341 | Brain_Cortex     | 21 | <i>AP001055.1</i>      | 45590699 | rs56132007  | 0.9740 | 45622705 | A | G | 0.20 | 6.83E-06 | 3.90E-02 | 6.71E-02 |
| rs55708341 | Brain_Cortex     | 21 | <i>LL21NC02-1C16.1</i> | 46349810 | rs56132007  | 0.9740 | 45622705 | A | G | 0.20 | 6.83E-06 | 8.75E-03 | 2.88E-02 |
| rs55708341 | Brain_Cortex     | 21 | <i>RRP1</i>            | 45217284 | rs55965762  | 0.9740 | 45622816 | T | A | 0.20 | 6.83E-06 | 4.62E-02 | 7.49E-02 |

|            |                          |    |                 |          |             |        |          |   |   |      |          |          |          |
|------------|--------------------------|----|-----------------|----------|-------------|--------|----------|---|---|------|----------|----------|----------|
| rs55708341 | Brain_Cortex             | 21 | AP001055.1      | 45590699 | rs55965762  | 0.9740 | 45622816 | T | A | 0.20 | 6.83E-06 | 3.90E-02 | 6.71E-02 |
| rs55708341 | Brain_Cortex             | 21 | LL21NC02-1C16.1 | 46349810 | rs55965762  | 0.9740 | 45622816 | T | A | 0.20 | 6.83E-06 | 8.75E-03 | 2.88E-02 |
| rs55708341 | Brain_Cortex             | 21 | RRP1            | 45217284 | rs55736164  | 0.9804 | 45622925 | C | G | 0.20 | 6.83E-06 | 4.62E-02 | 7.49E-02 |
| rs55708341 | Brain_Cortex             | 21 | AP001055.1      | 45590699 | rs55736164  | 0.9804 | 45622925 | C | G | 0.20 | 6.83E-06 | 3.90E-02 | 6.71E-02 |
| rs55708341 | Brain_Cortex             | 21 | LL21NC02-1C16.1 | 46349810 | rs55736164  | 0.9804 | 45622925 | C | G | 0.20 | 6.83E-06 | 8.75E-03 | 2.88E-02 |
| rs55708341 | Brain_Cortex             | 21 | LL21NC02-1C16.1 | 46349810 | rs62228216  | 0.9804 | 45623518 | T | C | 0.20 | 6.83E-06 | 8.16E-03 | 2.78E-02 |
| rs55708341 | Brain_Cortex             | 21 | LL21NC02-1C16.1 | 46349810 | rs56178904  | 0.9740 | 45624551 | T | C | 0.20 | 7.10E-06 | 7.45E-03 | 2.67E-02 |
| rs55708341 | Brain_Cortex             | 21 | LL21NC02-1C16.1 | 46349810 | rs3746959   | 0.9804 | 45625253 | A | G | 0.20 | 5.99E-06 | 1.35E-02 | 3.57E-02 |
| rs55708341 | Brain_Cortex             | 21 | LL21NC02-1C16.1 | 46349810 | rs55708341  | 1.0000 | 45627581 | T | A | 0.20 | 2.51E-06 | 7.94E-03 | 2.50E-02 |
| rs55708341 | Brain_Cortex             | 21 | LL21NC02-1C16.1 | 46349810 | rs58911644  | 0.9869 | 45629121 | T | A | 0.20 | 2.96E-06 | 7.94E-03 | 2.55E-02 |
| rs55708341 | Brain_Frontal_Cortex_BA9 | 21 | LINC00313       | 44890694 | rs59380543  | 0.9415 | 45617996 | T | C | 0.20 | 1.09E-05 | 4.34E-02 | 7.33E-02 |
| rs55708341 | Brain_Frontal_Cortex_BA9 | 21 | HSF2BP          | 45014223 | rs59380543  | 0.9415 | 45617996 | T | C | 0.20 | 1.09E-05 | 3.23E-02 | 6.10E-02 |
| rs55708341 | Brain_Frontal_Cortex_BA9 | 21 | CSTB            | 45194359 | rs59380543  | 0.9415 | 45617996 | T | C | 0.20 | 1.09E-05 | 2.22E-02 | 4.89E-02 |
| rs55708341 | Brain_Frontal_Cortex_BA9 | 21 | AP001058.3      | 45626845 | rs59380543  | 0.9415 | 45617996 | T | C | 0.20 | 1.09E-05 | 1.23E-02 | 3.55E-02 |
| rs55708341 | Brain_Frontal_Cortex_BA9 | 21 | LINC00313       | 44890694 | rs58139755  | 0.9415 | 45618128 | G | T | 0.20 | 2.00E-04 | 4.76E-02 | 1.00E-01 |
| rs55708341 | Brain_Frontal_Cortex_BA9 | 21 | CSTB            | 45194359 | rs58139755  | 0.9415 | 45618128 | G | T | 0.20 | 2.00E-04 | 5.40E-03 | 4.32E-02 |
| rs55708341 | Brain_Frontal_Cortex_BA9 | 21 | AP001058.3      | 45626845 | rs58139755  | 0.9415 | 45618128 | G | T | 0.20 | 2.00E-04 | 7.07E-04 | 2.63E-02 |
| rs55708341 | Brain_Frontal_Cortex_BA9 | 21 | LINC00313       | 44890694 | rs113526534 | 0.9545 | 45621230 | A | G | 0.20 | 2.01E-05 | 4.76E-02 | 8.07E-02 |
| rs55708341 | Brain_Frontal_Cortex_BA9 | 21 | CSTB            | 45194359 | rs113526534 | 0.9545 | 45621230 | A | G | 0.20 | 2.01E-05 | 5.40E-03 | 2.61E-02 |
| rs55708341 | Brain_Frontal_Cortex_BA9 | 21 | AP001058.3      | 45626845 | rs113526534 | 0.9545 | 45621230 | A | G | 0.20 | 2.01E-05 | 7.07E-04 | 1.25E-02 |
| rs55708341 | Brain_Frontal_Cortex_BA9 | 21 | LINC00313       | 44890694 | rs62228210  | 0.9545 | 45621292 | C | G | 0.20 | 2.01E-05 | 4.76E-02 | 8.07E-02 |
| rs55708341 | Brain_Frontal_Cortex_BA9 | 21 | CSTB            | 45194359 | rs62228210  | 0.9545 | 45621292 | C | G | 0.20 | 2.01E-05 | 5.40E-03 | 2.61E-02 |
| rs55708341 | Brain_Frontal_Cortex_BA9 | 21 | AP001058.3      | 45626845 | rs62228210  | 0.9545 | 45621292 | C | G | 0.20 | 2.01E-05 | 7.07E-04 | 1.25E-02 |
| rs55708341 | Brain_Frontal_Cortex_BA9 | 21 | LINC00313       | 44890694 | rs6518350   | 0.9740 | 45621817 | G | A | 0.20 | 5.13E-06 | 3.47E-02 | 6.12E-02 |
| rs55708341 | Brain_Frontal_Cortex_BA9 | 21 | CSTB            | 45194359 | rs6518350   | 0.9740 | 45621817 | G | A | 0.20 | 5.13E-06 | 8.92E-03 | 2.81E-02 |
| rs55708341 | Brain_Frontal_Cortex_BA9 | 21 | AP001058.3      | 45626845 | rs6518350   | 0.9740 | 45621817 | G | A | 0.20 | 5.13E-06 | 3.71E-04 | 7.53E-03 |
| rs55708341 | Brain_Frontal_Cortex_BA9 | 21 | LINC00313       | 44890694 | rs6518351   | 0.9740 | 45621939 | G | T | 0.20 | 3.98E-06 | 3.47E-02 | 6.06E-02 |
| rs55708341 | Brain_Frontal_Cortex_BA9 | 21 | CSTB            | 45194359 | rs6518351   | 0.9740 | 45621939 | G | T | 0.20 | 3.98E-06 | 8.92E-03 | 2.76E-02 |
| rs55708341 | Brain_Frontal_Cortex_BA9 | 21 | AP001058.3      | 45626845 | rs6518351   | 0.9740 | 45621939 | G | T | 0.20 | 3.98E-06 | 3.71E-04 | 7.25E-03 |
| rs55708341 | Brain_Frontal_Cortex_BA9 | 21 | LINC00313       | 44890694 | rs56299324  | 0.9740 | 45622609 | G | A | 0.20 | 7.67E-06 | 3.48E-02 | 6.27E-02 |
| rs55708341 | Brain_Frontal_Cortex_BA9 | 21 | HSF2BP          | 45014223 | rs56299324  | 0.9740 | 45622609 | G | A | 0.20 | 7.67E-06 | 4.09E-02 | 6.95E-02 |
| rs55708341 | Brain_Frontal_Cortex_BA9 | 21 | CSTB            | 45194359 | rs56299324  | 0.9740 | 45622609 | G | A | 0.20 | 7.67E-06 | 1.27E-02 | 3.51E-02 |
| rs55708341 | Brain_Frontal_Cortex_BA9 | 21 | AP001058.3      | 45626845 | rs56299324  | 0.9740 | 45622609 | G | A | 0.20 | 7.67E-06 | 2.09E-04 | 6.88E-03 |
| rs55708341 | Brain_Frontal_Cortex_BA9 | 21 | LINC00313       | 44890694 | rs56132007  | 0.9740 | 45622705 | A | G | 0.20 | 6.83E-06 | 3.48E-02 | 6.24E-02 |
| rs55708341 | Brain_Frontal_Cortex_BA9 | 21 | HSF2BP          | 45014223 | rs56132007  | 0.9740 | 45622705 | A | G | 0.20 | 6.83E-06 | 4.09E-02 | 6.93E-02 |
| rs55708341 | Brain_Frontal_Cortex_BA9 | 21 | CSTB            | 45194359 | rs56132007  | 0.9740 | 45622705 | A | G | 0.20 | 6.83E-06 | 1.27E-02 | 3.49E-02 |
| rs55708341 | Brain_Frontal_Cortex_BA9 | 21 | AP001058.3      | 45626845 | rs56132007  | 0.9740 | 45622705 | A | G | 0.20 | 6.83E-06 | 2.09E-04 | 6.77E-03 |
| rs55708341 | Brain_Frontal_Cortex_BA9 | 21 | LINC00313       | 44890694 | rs55965762  | 0.9740 | 45622816 | T | A | 0.20 | 6.83E-06 | 3.48E-02 | 6.24E-02 |
| rs55708341 | Brain_Frontal_Cortex_BA9 | 21 | HSF2BP          | 45014223 | rs55965762  | 0.9740 | 45622816 | T | A | 0.20 | 6.83E-06 | 4.09E-02 | 6.93E-02 |
| rs55708341 | Brain_Frontal_Cortex_BA9 | 21 | CSTB            | 45194359 | rs55965762  | 0.9740 | 45622816 | T | A | 0.20 | 6.83E-06 | 1.27E-02 | 3.49E-02 |

|            |                          |    |                 |          |             |        |          |   |   |      |          |          |          |
|------------|--------------------------|----|-----------------|----------|-------------|--------|----------|---|---|------|----------|----------|----------|
| rs55708341 | Brain_Frontal_Cortex_BA9 | 21 | AP001058.3      | 45626845 | rs55965762  | 0.9740 | 45622816 | T | A | 0.20 | 6.83E-06 | 2.09E-04 | 6.77E-03 |
| rs55708341 | Brain_Frontal_Cortex_BA9 | 21 | LINC00313       | 44890694 | rs55736164  | 0.9804 | 45622925 | C | G | 0.20 | 6.83E-06 | 4.04E-02 | 6.87E-02 |
| rs55708341 | Brain_Frontal_Cortex_BA9 | 21 | CSTB            | 45194359 | rs55736164  | 0.9804 | 45622925 | C | G | 0.20 | 6.83E-06 | 1.24E-02 | 3.45E-02 |
| rs55708341 | Brain_Frontal_Cortex_BA9 | 21 | AP001058.3      | 45626845 | rs55736164  | 0.9804 | 45622925 | C | G | 0.20 | 6.83E-06 | 1.77E-04 | 6.45E-03 |
| rs55708341 | Brain_Frontal_Cortex_BA9 | 21 | LINC00313       | 44890694 | rs62228216  | 0.9804 | 45623518 | T | C | 0.20 | 6.83E-06 | 3.48E-02 | 6.24E-02 |
| rs55708341 | Brain_Frontal_Cortex_BA9 | 21 | HSF2BP          | 45014223 | rs62228216  | 0.9804 | 45623518 | T | C | 0.20 | 6.83E-06 | 4.09E-02 | 6.93E-02 |
| rs55708341 | Brain_Frontal_Cortex_BA9 | 21 | CSTB            | 45194359 | rs62228216  | 0.9804 | 45623518 | T | C | 0.20 | 6.83E-06 | 1.27E-02 | 3.49E-02 |
| rs55708341 | Brain_Frontal_Cortex_BA9 | 21 | AP001058.3      | 45626845 | rs62228216  | 0.9804 | 45623518 | T | C | 0.20 | 6.83E-06 | 2.09E-04 | 6.77E-03 |
| rs55708341 | Brain_Frontal_Cortex_BA9 | 21 | LINC00313       | 44890694 | rs56178904  | 0.9740 | 45624551 | T | C | 0.20 | 7.10E-06 | 4.76E-02 | 7.66E-02 |
| rs55708341 | Brain_Frontal_Cortex_BA9 | 21 | HSF2BP          | 45014223 | rs56178904  | 0.9740 | 45624551 | T | C | 0.20 | 7.10E-06 | 3.62E-02 | 6.43E-02 |
| rs55708341 | Brain_Frontal_Cortex_BA9 | 21 | CSTB            | 45194359 | rs56178904  | 0.9740 | 45624551 | T | C | 0.20 | 7.10E-06 | 7.87E-03 | 2.75E-02 |
| rs55708341 | Brain_Frontal_Cortex_BA9 | 21 | AP001058.3      | 45626845 | rs56178904  | 0.9740 | 45624551 | T | C | 0.20 | 7.10E-06 | 4.10E-04 | 8.45E-03 |
| rs55708341 | Brain_Frontal_Cortex_BA9 | 21 | LINC00313       | 44890694 | rs3746959   | 0.9804 | 45625253 | A | G | 0.20 | 5.99E-06 | 4.86E-02 | 7.70E-02 |
| rs55708341 | Brain_Frontal_Cortex_BA9 | 21 | HSF2BP          | 45014223 | rs3746959   | 0.9804 | 45625253 | A | G | 0.20 | 5.99E-06 | 2.28E-02 | 4.80E-02 |
| rs55708341 | Brain_Frontal_Cortex_BA9 | 21 | CSTB            | 45194359 | rs3746959   | 0.9804 | 45625253 | A | G | 0.20 | 5.99E-06 | 2.65E-02 | 5.24E-02 |
| rs55708341 | Brain_Frontal_Cortex_BA9 | 21 | AP001058.3      | 45626845 | rs3746959   | 0.9804 | 45625253 | A | G | 0.20 | 5.99E-06 | 1.75E-03 | 1.38E-02 |
| rs55708341 | Brain_Frontal_Cortex_BA9 | 21 | LINC00313       | 44890694 | rs55708341  | 1.0000 | 45627581 | T | A | 0.20 | 2.51E-06 | 4.70E-02 | 7.27E-02 |
| rs55708341 | Brain_Frontal_Cortex_BA9 | 21 | HSF2BP          | 45014223 | rs55708341  | 1.0000 | 45627581 | T | A | 0.20 | 2.51E-06 | 4.84E-02 | 7.42E-02 |
| rs55708341 | Brain_Frontal_Cortex_BA9 | 21 | CSTB            | 45194359 | rs55708341  | 1.0000 | 45627581 | T | A | 0.20 | 2.51E-06 | 5.21E-03 | 2.02E-02 |
| rs55708341 | Brain_Frontal_Cortex_BA9 | 21 | AP001058.3      | 45626845 | rs55708341  | 1.0000 | 45627581 | T | A | 0.20 | 2.51E-06 | 6.86E-04 | 8.38E-03 |
| rs55708341 | Brain_Frontal_Cortex_BA9 | 21 | LINC00313       | 44890694 | rs58911644  | 0.9869 | 45629121 | T | A | 0.20 | 2.96E-06 | 4.70E-02 | 7.34E-02 |
| rs55708341 | Brain_Frontal_Cortex_BA9 | 21 | HSF2BP          | 45014223 | rs58911644  | 0.9869 | 45629121 | T | A | 0.20 | 2.96E-06 | 4.84E-02 | 7.49E-02 |
| rs55708341 | Brain_Frontal_Cortex_BA9 | 21 | CSTB            | 45194359 | rs58911644  | 0.9869 | 45629121 | T | A | 0.20 | 2.96E-06 | 5.21E-03 | 2.07E-02 |
| rs55708341 | Brain_Frontal_Cortex_BA9 | 21 | AP001058.3      | 45626845 | rs58911644  | 0.9869 | 45629121 | T | A | 0.20 | 2.96E-06 | 6.86E-04 | 8.71E-03 |
| rs55708341 | Brain_Hippocampus        | 21 | LRRC3DN         | 45880946 | rs59380543  | 0.9415 | 45617996 | T | C | 0.20 | 1.09E-05 | 1.56E-02 | 4.03E-02 |
| rs55708341 | Brain_Hippocampus        | 21 | ITGB2-AS1       | 46345308 | rs59380543  | 0.9415 | 45617996 | T | C | 0.20 | 1.09E-05 | 1.81E-02 | 4.36E-02 |
| rs55708341 | Brain_Hippocampus        | 21 | LL21NC02-1C16.2 | 46356543 | rs59380543  | 0.9415 | 45617996 | T | C | 0.20 | 1.09E-05 | 1.21E-02 | 3.52E-02 |
| rs55708341 | Brain_Hippocampus        | 21 | LRRC3DN         | 45880946 | rs58139755  | 0.9415 | 45618128 | G | T | 0.20 | 2.00E-04 | 4.31E-02 | 9.55E-02 |
| rs55708341 | Brain_Hippocampus        | 21 | LL21NC02-1C16.2 | 46356543 | rs58139755  | 0.9415 | 45618128 | G | T | 0.20 | 2.00E-04 | 3.17E-02 | 8.27E-02 |
| rs55708341 | Brain_Hippocampus        | 21 | LRRC3DN         | 45880946 | rs113526534 | 0.9545 | 45621230 | A | G | 0.20 | 2.01E-05 | 3.30E-02 | 6.47E-02 |
| rs55708341 | Brain_Hippocampus        | 21 | LL21NC02-1C16.2 | 46356543 | rs113526534 | 0.9545 | 45621230 | A | G | 0.20 | 2.01E-05 | 2.99E-02 | 6.11E-02 |
| rs55708341 | Brain_Hippocampus        | 21 | LRRC3DN         | 45880946 | rs62228210  | 0.9545 | 45621292 | C | G | 0.20 | 2.01E-05 | 3.30E-02 | 6.47E-02 |
| rs55708341 | Brain_Hippocampus        | 21 | LL21NC02-1C16.2 | 46356543 | rs62228210  | 0.9545 | 45621292 | C | G | 0.20 | 2.01E-05 | 2.99E-02 | 6.11E-02 |
| rs55708341 | Brain_Hippocampus        | 21 | LRRC3DN         | 45880946 | rs6518350   | 0.9740 | 45621817 | G | A | 0.20 | 5.13E-06 | 3.99E-02 | 6.69E-02 |
| rs55708341 | Brain_Hippocampus        | 21 | ITGB2-AS1       | 46345308 | rs6518350   | 0.9740 | 45621817 | G | A | 0.20 | 5.13E-06 | 3.54E-02 | 6.20E-02 |
| rs55708341 | Brain_Hippocampus        | 21 | LL21NC02-1C16.2 | 46356543 | rs6518350   | 0.9740 | 45621817 | G | A | 0.20 | 5.13E-06 | 2.35E-02 | 4.82E-02 |
| rs55708341 | Brain_Hippocampus        | 21 | LRRC3DN         | 45880946 | rs6518351   | 0.9740 | 45621939 | G | T | 0.20 | 3.98E-06 | 3.99E-02 | 6.63E-02 |
| rs55708341 | Brain_Hippocampus        | 21 | ITGB2-AS1       | 46345308 | rs6518351   | 0.9740 | 45621939 | G | T | 0.20 | 3.98E-06 | 3.54E-02 | 6.14E-02 |
| rs55708341 | Brain_Hippocampus        | 21 | LL21NC02-1C16.2 | 46356543 | rs6518351   | 0.9740 | 45621939 | G | T | 0.20 | 3.98E-06 | 2.35E-02 | 4.76E-02 |
| rs55708341 | Brain_Hippocampus        | 21 | LRRC3DN         | 45880946 | rs56299324  | 0.9740 | 45622609 | G | A | 0.20 | 7.67E-06 | 3.99E-02 | 6.83E-02 |

|            |                    |    |                        |          |             |        |          |   |   |      |          |          |          |
|------------|--------------------|----|------------------------|----------|-------------|--------|----------|---|---|------|----------|----------|----------|
| rs55708341 | Brain_Hippocampus  | 21 | <i>ITGB2-AS1</i>       | 46345308 | rs56299324  | 0.9740 | 45622609 | G | A | 0.20 | 7.67E-06 | 3.54E-02 | 6.34E-02 |
| rs55708341 | Brain_Hippocampus  | 21 | <i>LL21NC02-1C16.2</i> | 46356543 | rs56299324  | 0.9740 | 45622609 | G | A | 0.20 | 7.67E-06 | 2.35E-02 | 4.95E-02 |
| rs55708341 | Brain_Hippocampus  | 21 | <i>LRRC3DN</i>         | 45880946 | rs56132007  | 0.9740 | 45622705 | A | G | 0.20 | 6.83E-06 | 3.99E-02 | 6.81E-02 |
| rs55708341 | Brain_Hippocampus  | 21 | <i>ITGB2-AS1</i>       | 46345308 | rs56132007  | 0.9740 | 45622705 | A | G | 0.20 | 6.83E-06 | 3.54E-02 | 6.32E-02 |
| rs55708341 | Brain_Hippocampus  | 21 | <i>LL21NC02-1C16.2</i> | 46356543 | rs56132007  | 0.9740 | 45622705 | A | G | 0.20 | 6.83E-06 | 2.35E-02 | 4.93E-02 |
| rs55708341 | Brain_Hippocampus  | 21 | <i>LRRC3DN</i>         | 45880946 | rs55965762  | 0.9740 | 45622816 | T | A | 0.20 | 6.83E-06 | 3.99E-02 | 6.81E-02 |
| rs55708341 | Brain_Hippocampus  | 21 | <i>ITGB2-AS1</i>       | 46345308 | rs55965762  | 0.9740 | 45622816 | T | A | 0.20 | 6.83E-06 | 3.54E-02 | 6.32E-02 |
| rs55708341 | Brain_Hippocampus  | 21 | <i>LL21NC02-1C16.2</i> | 46356543 | rs55965762  | 0.9740 | 45622816 | T | A | 0.20 | 6.83E-06 | 2.35E-02 | 4.93E-02 |
| rs55708341 | Brain_Hippocampus  | 21 | <i>ITGB2-AS1</i>       | 46345308 | rs55736164  | 0.9804 | 45622925 | C | G | 0.20 | 6.83E-06 | 3.15E-02 | 5.87E-02 |
| rs55708341 | Brain_Hippocampus  | 21 | <i>LL21NC02-1C16.2</i> | 46356543 | rs55736164  | 0.9804 | 45622925 | C | G | 0.20 | 6.83E-06 | 2.25E-02 | 4.80E-02 |
| rs55708341 | Brain_Hippocampus  | 21 | <i>LL21NC02-1C16.2</i> | 46356543 | rs62228216  | 0.9804 | 45623518 | T | C | 0.20 | 6.83E-06 | 3.38E-02 | 6.13E-02 |
| rs55708341 | Brain_Hippocampus  | 21 | <i>ADARB1</i>          | 46570481 | rs62228216  | 0.9804 | 45623518 | T | C | 0.20 | 6.83E-06 | 4.57E-02 | 7.44E-02 |
| rs55708341 | Brain_Hippocampus  | 21 | <i>LRRC3DN</i>         | 45880946 | rs56178904  | 0.9740 | 45624551 | T | C | 0.20 | 7.10E-06 | 4.21E-02 | 7.07E-02 |
| rs55708341 | Brain_Hippocampus  | 21 | <i>LL21NC02-1C16.2</i> | 46356543 | rs56178904  | 0.9740 | 45624551 | T | C | 0.20 | 7.10E-06 | 4.17E-02 | 7.03E-02 |
| rs55708341 | Brain_Hippocampus  | 21 | <i>AP001065.2</i>      | 45839814 | rs3746959   | 0.9804 | 45625253 | A | G | 0.20 | 5.99E-06 | 4.12E-02 | 6.91E-02 |
| rs55708341 | Brain_Hippocampus  | 21 | <i>LRRC3DN</i>         | 45880946 | rs3746959   | 0.9804 | 45625253 | A | G | 0.20 | 5.99E-06 | 2.42E-02 | 4.97E-02 |
| rs55708341 | Brain_Hippocampus  | 21 | <i>ITGB2-AS1</i>       | 46345308 | rs3746959   | 0.9804 | 45625253 | A | G | 0.20 | 5.99E-06 | 2.31E-02 | 4.83E-02 |
| rs55708341 | Brain_Hippocampus  | 21 | <i>LL21NC02-1C16.2</i> | 46356543 | rs3746959   | 0.9804 | 45625253 | A | G | 0.20 | 5.99E-06 | 1.20E-02 | 3.35E-02 |
| rs55708341 | Brain_Hippocampus  | 21 | <i>LL21NC02-1C16.2</i> | 46356543 | rs55708341  | 1.0000 | 45627581 | T | A | 0.20 | 2.51E-06 | 2.38E-02 | 4.67E-02 |
| rs55708341 | Brain_Hippocampus  | 21 | <i>LL21NC02-1C16.2</i> | 46356543 | rs58911644  | 0.9869 | 45629121 | T | A | 0.20 | 2.96E-06 | 2.38E-02 | 4.74E-02 |
| rs55708341 | Brain_Hypothalamus | 21 | <i>HSF2BP</i>          | 45014223 | rs59380543  | 0.9415 | 45617996 | T | C | 0.20 | 1.09E-05 | 3.24E-02 | 6.11E-02 |
| rs55708341 | Brain_Hypothalamus | 21 | <i>AGPAT3</i>          | 45345742 | rs59380543  | 0.9415 | 45617996 | T | C | 0.20 | 1.09E-05 | 3.58E-02 | 6.49E-02 |
| rs55708341 | Brain_Hypothalamus | 21 | <i>HSF2BP</i>          | 45014223 | rs58139755  | 0.9415 | 45618128 | G | T | 0.20 | 2.00E-04 | 2.98E-02 | 8.05E-02 |
| rs55708341 | Brain_Hypothalamus | 21 | <i>CSTB</i>            | 45194359 | rs58139755  | 0.9415 | 45618128 | G | T | 0.20 | 2.00E-04 | 2.57E-02 | 7.54E-02 |
| rs55708341 | Brain_Hypothalamus | 21 | <i>AP001065.7</i>      | 45891105 | rs58139755  | 0.9415 | 45618128 | G | T | 0.20 | 2.00E-04 | 2.17E-02 | 7.03E-02 |
| rs55708341 | Brain_Hypothalamus | 21 | <i>HSF2BP</i>          | 45014223 | rs113526534 | 0.9545 | 45621230 | A | G | 0.20 | 2.01E-05 | 3.80E-02 | 7.03E-02 |
| rs55708341 | Brain_Hypothalamus | 21 | <i>CSTB</i>            | 45194359 | rs113526534 | 0.9545 | 45621230 | A | G | 0.20 | 2.01E-05 | 3.61E-02 | 6.82E-02 |
| rs55708341 | Brain_Hypothalamus | 21 | <i>AP001065.7</i>      | 45891105 | rs113526534 | 0.9545 | 45621230 | A | G | 0.20 | 2.01E-05 | 2.12E-02 | 5.05E-02 |
| rs55708341 | Brain_Hypothalamus | 21 | <i>HSF2BP</i>          | 45014223 | rs62228210  | 0.9545 | 45621292 | C | G | 0.20 | 2.01E-05 | 3.80E-02 | 7.03E-02 |
| rs55708341 | Brain_Hypothalamus | 21 | <i>CSTB</i>            | 45194359 | rs62228210  | 0.9545 | 45621292 | C | G | 0.20 | 2.01E-05 | 3.61E-02 | 6.82E-02 |
| rs55708341 | Brain_Hypothalamus | 21 | <i>AP001065.7</i>      | 45891105 | rs62228210  | 0.9545 | 45621292 | C | G | 0.20 | 2.01E-05 | 2.12E-02 | 5.05E-02 |
| rs55708341 | Brain_Hypothalamus | 21 | <i>HSF2BP</i>          | 45014223 | rs6518350   | 0.9740 | 45621817 | G | A | 0.20 | 5.13E-06 | 3.15E-02 | 5.76E-02 |
| rs55708341 | Brain_Hypothalamus | 21 | <i>CSTB</i>            | 45194359 | rs6518350   | 0.9740 | 45621817 | G | A | 0.20 | 5.13E-06 | 2.81E-02 | 5.36E-02 |
| rs55708341 | Brain_Hypothalamus | 21 | <i>AP001055.1</i>      | 45590699 | rs6518350   | 0.9740 | 45621817 | G | A | 0.20 | 5.13E-06 | 4.98E-02 | 7.76E-02 |
| rs55708341 | Brain_Hypothalamus | 21 | <i>AP001065.7</i>      | 45891105 | rs6518350   | 0.9740 | 45621817 | G | A | 0.20 | 5.13E-06 | 2.64E-02 | 5.16E-02 |
| rs55708341 | Brain_Hypothalamus | 21 | <i>HSF2BP</i>          | 45014223 | rs6518351   | 0.9740 | 45621939 | G | T | 0.20 | 3.98E-06 | 3.15E-02 | 5.70E-02 |
| rs55708341 | Brain_Hypothalamus | 21 | <i>CSTB</i>            | 45194359 | rs6518351   | 0.9740 | 45621939 | G | T | 0.20 | 3.98E-06 | 2.81E-02 | 5.31E-02 |
| rs55708341 | Brain_Hypothalamus | 21 | <i>AP001055.1</i>      | 45590699 | rs6518351   | 0.9740 | 45621939 | G | T | 0.20 | 3.98E-06 | 4.98E-02 | 7.70E-02 |
| rs55708341 | Brain_Hypothalamus | 21 | <i>AP001065.7</i>      | 45891105 | rs6518351   | 0.9740 | 45621939 | G | T | 0.20 | 3.98E-06 | 2.64E-02 | 5.10E-02 |
| rs55708341 | Brain_Hypothalamus | 21 | <i>HSF2BP</i>          | 45014223 | rs56299324  | 0.9740 | 45622609 | G | A | 0.20 | 7.67E-06 | 3.15E-02 | 5.90E-02 |

|            |                                       |    |                   |          |            |        |          |   |   |      |          |          |          |
|------------|---------------------------------------|----|-------------------|----------|------------|--------|----------|---|---|------|----------|----------|----------|
| rs55708341 | Brain_Hypothalamus                    | 21 | <i>CSTB</i>       | 45194359 | rs56299324 | 0.9740 | 45622609 | G | A | 0.20 | 7.67E-06 | 2.81E-02 | 5.50E-02 |
| rs55708341 | Brain_Hypothalamus                    | 21 | <i>AP001055.1</i> | 45590699 | rs56299324 | 0.9740 | 45622609 | G | A | 0.20 | 7.67E-06 | 4.98E-02 | 7.90E-02 |
| rs55708341 | Brain_Hypothalamus                    | 21 | <i>AP001065.7</i> | 45891105 | rs56299324 | 0.9740 | 45622609 | G | A | 0.20 | 7.67E-06 | 2.64E-02 | 5.30E-02 |
| rs55708341 | Brain_Hypothalamus                    | 21 | <i>HSF2BP</i>     | 45014223 | rs56132007 | 0.9740 | 45622705 | A | G | 0.20 | 6.83E-06 | 3.15E-02 | 5.87E-02 |
| rs55708341 | Brain_Hypothalamus                    | 21 | <i>CSTB</i>       | 45194359 | rs56132007 | 0.9740 | 45622705 | A | G | 0.20 | 6.83E-06 | 2.81E-02 | 5.48E-02 |
| rs55708341 | Brain_Hypothalamus                    | 21 | <i>AP001055.1</i> | 45590699 | rs56132007 | 0.9740 | 45622705 | A | G | 0.20 | 6.83E-06 | 4.98E-02 | 7.87E-02 |
| rs55708341 | Brain_Hypothalamus                    | 21 | <i>AP001065.7</i> | 45891105 | rs56132007 | 0.9740 | 45622705 | A | G | 0.20 | 6.83E-06 | 2.64E-02 | 5.27E-02 |
| rs55708341 | Brain_Hypothalamus                    | 21 | <i>HSF2BP</i>     | 45014223 | rs55965762 | 0.9740 | 45622816 | T | A | 0.20 | 6.83E-06 | 3.15E-02 | 5.87E-02 |
| rs55708341 | Brain_Hypothalamus                    | 21 | <i>CSTB</i>       | 45194359 | rs55965762 | 0.9740 | 45622816 | T | A | 0.20 | 6.83E-06 | 2.81E-02 | 5.48E-02 |
| rs55708341 | Brain_Hypothalamus                    | 21 | <i>AP001055.1</i> | 45590699 | rs55965762 | 0.9740 | 45622816 | T | A | 0.20 | 6.83E-06 | 4.98E-02 | 7.87E-02 |
| rs55708341 | Brain_Hypothalamus                    | 21 | <i>AP001065.7</i> | 45891105 | rs55965762 | 0.9740 | 45622816 | T | A | 0.20 | 6.83E-06 | 2.64E-02 | 5.27E-02 |
| rs55708341 | Brain_Hypothalamus                    | 21 | <i>HSF2BP</i>     | 45014223 | rs55736164 | 0.9804 | 45622925 | C | G | 0.20 | 6.83E-06 | 2.56E-02 | 5.18E-02 |
| rs55708341 | Brain_Hypothalamus                    | 21 | <i>CSTB</i>       | 45194359 | rs55736164 | 0.9804 | 45622925 | C | G | 0.20 | 6.83E-06 | 4.55E-02 | 7.42E-02 |
| rs55708341 | Brain_Hypothalamus                    | 21 | <i>AP001055.1</i> | 45590699 | rs55736164 | 0.9804 | 45622925 | C | G | 0.20 | 6.83E-06 | 4.58E-02 | 7.45E-02 |
| rs55708341 | Brain_Hypothalamus                    | 21 | <i>AP001065.7</i> | 45891105 | rs55736164 | 0.9804 | 45622925 | C | G | 0.20 | 6.83E-06 | 2.53E-02 | 5.14E-02 |
| rs55708341 | Brain_Hypothalamus                    | 21 | <i>HSF2BP</i>     | 45014223 | rs62228216 | 0.9804 | 45623518 | T | C | 0.20 | 6.83E-06 | 3.19E-02 | 5.91E-02 |
| rs55708341 | Brain_Hypothalamus                    | 21 | <i>CSTB</i>       | 45194359 | rs62228216 | 0.9804 | 45623518 | T | C | 0.20 | 6.83E-06 | 2.09E-02 | 4.60E-02 |
| rs55708341 | Brain_Hypothalamus                    | 21 | <i>AP001055.1</i> | 45590699 | rs62228216 | 0.9804 | 45623518 | T | C | 0.20 | 6.83E-06 | 3.44E-02 | 6.21E-02 |
| rs55708341 | Brain_Hypothalamus                    | 21 | <i>AP001065.7</i> | 45891105 | rs62228216 | 0.9804 | 45623518 | T | C | 0.20 | 6.83E-06 | 3.44E-02 | 6.20E-02 |
| rs55708341 | Brain_Hypothalamus                    | 21 | <i>HSF2BP</i>     | 45014223 | rs56178904 | 0.9740 | 45624551 | T | C | 0.20 | 7.10E-06 | 3.82E-02 | 6.65E-02 |
| rs55708341 | Brain_Hypothalamus                    | 21 | <i>CSTB</i>       | 45194359 | rs56178904 | 0.9740 | 45624551 | T | C | 0.20 | 7.10E-06 | 2.71E-02 | 5.38E-02 |
| rs55708341 | Brain_Hypothalamus                    | 21 | <i>AP001055.1</i> | 45590699 | rs56178904 | 0.9740 | 45624551 | T | C | 0.20 | 7.10E-06 | 4.80E-02 | 7.70E-02 |
| rs55708341 | Brain_Hypothalamus                    | 21 | <i>AP001065.7</i> | 45891105 | rs56178904 | 0.9740 | 45624551 | T | C | 0.20 | 7.10E-06 | 2.77E-02 | 5.45E-02 |
| rs55708341 | Brain_Hypothalamus                    | 21 | <i>HSF2BP</i>     | 45014223 | rs3746959  | 0.9804 | 45625253 | A | G | 0.20 | 5.99E-06 | 1.39E-02 | 3.62E-02 |
| rs55708341 | Brain_Hypothalamus                    | 21 | <i>HSF2BP</i>     | 45014223 | rs55708341 | 1.0000 | 45627581 | T | A | 0.20 | 2.51E-06 | 3.71E-02 | 6.20E-02 |
| rs55708341 | Brain_Hypothalamus                    | 21 | <i>CSTB</i>       | 45194359 | rs55708341 | 1.0000 | 45627581 | T | A | 0.20 | 2.51E-06 | 1.83E-02 | 3.98E-02 |
| rs55708341 | Brain_Hypothalamus                    | 21 | <i>AP001065.7</i> | 45891105 | rs55708341 | 1.0000 | 45627581 | T | A | 0.20 | 2.51E-06 | 3.73E-02 | 6.23E-02 |
| rs55708341 | Brain_Hypothalamus                    | 21 | <i>HSF2BP</i>     | 45014223 | rs58911644 | 0.9869 | 45629121 | T | A | 0.20 | 2.96E-06 | 3.71E-02 | 6.27E-02 |
| rs55708341 | Brain_Hypothalamus                    | 21 | <i>CSTB</i>       | 45194359 | rs58911644 | 0.9869 | 45629121 | T | A | 0.20 | 2.96E-06 | 1.83E-02 | 4.04E-02 |
| rs55708341 | Brain_Hypothalamus                    | 21 | <i>AP001065.7</i> | 45891105 | rs58911644 | 0.9869 | 45629121 | T | A | 0.20 | 2.96E-06 | 3.73E-02 | 6.30E-02 |
| rs55708341 | Brain_Nucleus_accumbens_basal_ganglia | 21 | <i>LRRC3</i>      | 45877054 | rs59380543 | 0.9415 | 45617996 | T | C | 0.20 | 1.09E-05 | 4.59E-03 | 2.22E-02 |
| rs55708341 | Brain_Nucleus_accumbens_basal_ganglia | 21 | <i>LRRC3DN</i>    | 45880946 | rs59380543 | 0.9415 | 45617996 | T | C | 0.20 | 1.09E-05 | 2.53E-02 | 5.28E-02 |
| rs55708341 | Brain_Nucleus_accumbens_basal_ganglia | 21 | <i>AP001058.3</i> | 45626845 | rs58139755 | 0.9415 | 45618128 | G | T | 0.20 | 2.00E-04 | 4.91E-02 | 1.02E-01 |
| rs55708341 | Brain_Nucleus_accumbens_basal_ganglia | 21 | <i>LRRC3</i>      | 45877054 | rs58139755 | 0.9415 | 45618128 | G | T | 0.20 | 2.00E-04 | 2.12E-02 | 6.96E-02 |
| rs55708341 | Brain_Nucleus_accumbens_basal_ganglia | 21 | <i>AP001058.3</i> | 45626845 | s113526534 | 0.9545 | 45621230 | A | G | 0.20 | 2.01E-05 | 4.71E-02 | 8.02E-02 |
| rs55708341 | Brain_Nucleus_accumbens_basal_ganglia | 21 | <i>LRRC3</i>      | 45877054 | s113526534 | 0.9545 | 45621230 | A | G | 0.20 | 2.01E-05 | 1.50E-02 | 4.20E-02 |
| rs55708341 | Brain_Nucleus_accumbens_basal_ganglia | 21 | <i>LRRC3</i>      | 45877054 | rs62228210 | 0.9545 | 45621292 | C | G | 0.20 | 2.01E-05 | 1.62E-02 | 4.38E-02 |
| rs55708341 | Brain_Nucleus_accumbens_basal_ganglia | 21 | <i>LRRC3</i>      | 45877054 | rs6518350  | 0.9740 | 45621817 | G | A | 0.20 | 5.13E-06 | 2.55E-02 | 5.05E-02 |
| rs55708341 | Brain_Nucleus_accumbens_basal_ganglia | 21 | <i>LRRC3</i>      | 45877054 | rs6518351  | 0.9740 | 45621939 | G | T | 0.20 | 3.98E-06 | 2.55E-02 | 4.99E-02 |
| rs55708341 | Brain_Nucleus_accumbens_basal_ganglia | 21 | <i>LRRC3</i>      | 45877054 | rs56299324 | 0.9740 | 45622609 | G | A | 0.20 | 7.67E-06 | 2.67E-02 | 5.33E-02 |

|            |                                       |    |                   |          |             |        |          |   |   |      |          |          |          |
|------------|---------------------------------------|----|-------------------|----------|-------------|--------|----------|---|---|------|----------|----------|----------|
| rs55708341 | Brain_Nucleus_accumbens_basal_ganglia | 21 | <i>C21orf90</i>   | 45941467 | rs56299324  | 0.9740 | 45622609 | G | A | 0.20 | 7.67E-06 | 4.36E-02 | 7.24E-02 |
| rs55708341 | Brain_Nucleus_accumbens_basal_ganglia | 21 | <i>LRRC3</i>      | 45877054 | rs56132007  | 0.9740 | 45622705 | A | G | 0.20 | 6.83E-06 | 2.67E-02 | 5.31E-02 |
| rs55708341 | Brain_Nucleus_accumbens_basal_ganglia | 21 | <i>C21orf90</i>   | 45941467 | rs56132007  | 0.9740 | 45622705 | A | G | 0.20 | 6.83E-06 | 4.36E-02 | 7.22E-02 |
| rs55708341 | Brain_Nucleus_accumbens_basal_ganglia | 21 | <i>LRRC3</i>      | 45877054 | rs55965762  | 0.9740 | 45622816 | T | A | 0.20 | 6.83E-06 | 2.67E-02 | 5.31E-02 |
| rs55708341 | Brain_Nucleus_accumbens_basal_ganglia | 21 | <i>C21orf90</i>   | 45941467 | rs55965762  | 0.9740 | 45622816 | T | A | 0.20 | 6.83E-06 | 4.36E-02 | 7.22E-02 |
| rs55708341 | Brain_Nucleus_accumbens_basal_ganglia | 21 | <i>LRRC3</i>      | 45877054 | rs55736164  | 0.9804 | 45622925 | C | G | 0.20 | 6.83E-06 | 4.41E-02 | 7.27E-02 |
| rs55708341 | Brain_Nucleus_accumbens_basal_ganglia | 21 | <i>AP001058.3</i> | 45626845 | rs62228216  | 0.9804 | 45623518 | T | C | 0.20 | 6.83E-06 | 4.09E-02 | 6.92E-02 |
| rs55708341 | Brain_Nucleus_accumbens_basal_ganglia | 21 | <i>LRRC3</i>      | 45877054 | rs62228216  | 0.9804 | 45623518 | T | C | 0.20 | 6.83E-06 | 2.83E-02 | 5.50E-02 |
| rs55708341 | Brain_Nucleus_accumbens_basal_ganglia | 21 | <i>C21orf90</i>   | 45941467 | rs62228216  | 0.9804 | 45623518 | T | C | 0.20 | 6.83E-06 | 1.38E-02 | 3.65E-02 |
| rs55708341 | Brain_Nucleus_accumbens_basal_ganglia | 21 | <i>AP001058.3</i> | 45626845 | rs56178904  | 0.9740 | 45624551 | T | C | 0.20 | 7.10E-06 | 3.59E-02 | 6.39E-02 |
| rs55708341 | Brain_Nucleus_accumbens_basal_ganglia | 21 | <i>LRRC3</i>      | 45877054 | rs56178904  | 0.9740 | 45624551 | T | C | 0.20 | 7.10E-06 | 1.82E-02 | 4.26E-02 |
| rs55708341 | Brain_Nucleus_accumbens_basal_ganglia | 21 | <i>C21orf90</i>   | 45941467 | rs56178904  | 0.9740 | 45624551 | T | C | 0.20 | 7.10E-06 | 1.11E-02 | 3.27E-02 |
| rs55708341 | Brain_Nucleus_accumbens_basal_ganglia | 21 | <i>AP001058.3</i> | 45626845 | rs3746959   | 0.9804 | 45625253 | A | G | 0.20 | 5.99E-06 | 2.09E-02 | 4.55E-02 |
| rs55708341 | Brain_Nucleus_accumbens_basal_ganglia | 21 | <i>LRRC3</i>      | 45877054 | rs3746959   | 0.9804 | 45625253 | A | G | 0.20 | 5.99E-06 | 2.79E-03 | 1.67E-02 |
| rs55708341 | Brain_Nucleus_accumbens_basal_ganglia | 21 | <i>LRRC3DN</i>    | 45880946 | rs3746959   | 0.9804 | 45625253 | A | G | 0.20 | 5.99E-06 | 4.44E-02 | 7.26E-02 |
| rs55708341 | Brain_Nucleus_accumbens_basal_ganglia | 21 | <i>C21orf90</i>   | 45941467 | rs3746959   | 0.9804 | 45625253 | A | G | 0.20 | 5.99E-06 | 3.47E-02 | 6.20E-02 |
| rs55708341 | Brain_Nucleus_accumbens_basal_ganglia | 21 | <i>AP001058.3</i> | 45626845 | rs55708341  | 1.0000 | 45627581 | T | A | 0.20 | 2.51E-06 | 4.65E-02 | 7.22E-02 |
| rs55708341 | Brain_Nucleus_accumbens_basal_ganglia | 21 | <i>ICOSLG</i>     | 45651861 | rs55708341  | 1.0000 | 45627581 | T | A | 0.20 | 2.51E-06 | 4.79E-02 | 7.37E-02 |
| rs55708341 | Brain_Nucleus_accumbens_basal_ganglia | 21 | <i>LRRC3</i>      | 45877054 | rs55708341  | 1.0000 | 45627581 | T | A | 0.20 | 2.51E-06 | 3.77E-02 | 6.27E-02 |
| rs55708341 | Brain_Nucleus_accumbens_basal_ganglia | 21 | <i>C21orf90</i>   | 45941467 | rs55708341  | 1.0000 | 45627581 | T | A | 0.20 | 2.51E-06 | 1.11E-02 | 2.99E-02 |
| rs55708341 | Brain_Nucleus_accumbens_basal_ganglia | 21 | <i>AP001058.3</i> | 45626845 | rs58911644  | 0.9869 | 45629121 | T | A | 0.20 | 2.96E-06 | 4.65E-02 | 7.29E-02 |
| rs55708341 | Brain_Nucleus_accumbens_basal_ganglia | 21 | <i>ICOSLG</i>     | 45651861 | rs58911644  | 0.9869 | 45629121 | T | A | 0.20 | 2.96E-06 | 4.79E-02 | 7.44E-02 |
| rs55708341 | Brain_Nucleus_accumbens_basal_ganglia | 21 | <i>LRRC3</i>      | 45877054 | rs58911644  | 0.9869 | 45629121 | T | A | 0.20 | 2.96E-06 | 3.77E-02 | 6.34E-02 |
| rs55708341 | Brain_Nucleus_accumbens_basal_ganglia | 21 | <i>C21orf90</i>   | 45941467 | rs58911644  | 0.9869 | 45629121 | T | A | 0.20 | 2.96E-06 | 1.11E-02 | 3.05E-02 |
| rs55708341 | Brain_Putamen_basal_ganglia           | 21 | <i>LRRC3DN</i>    | 45880946 | rs58139755  | 0.9415 | 45618128 | G | T | 0.20 | 2.00E-04 | 2.19E-02 | 7.06E-02 |
| rs55708341 | Brain_Putamen_basal_ganglia           | 21 | <i>LRRC3DN</i>    | 45880946 | rs113526534 | 0.9545 | 45621230 | A | G | 0.20 | 2.01E-05 | 2.41E-02 | 5.41E-02 |
| rs55708341 | Brain_Putamen_basal_ganglia           | 21 | <i>LRRC3DN</i>    | 45880946 | rs62228210  | 0.9545 | 45621292 | C | G | 0.20 | 2.01E-05 | 2.41E-02 | 5.41E-02 |
| rs55708341 | Brain_Putamen_basal_ganglia           | 21 | <i>LRRC3DN</i>    | 45880946 | rs6518350   | 0.9740 | 45621817 | G | A | 0.20 | 5.13E-06 | 2.21E-02 | 4.63E-02 |
| rs55708341 | Brain_Putamen_basal_ganglia           | 21 | <i>LRRC3DN</i>    | 45880946 | rs6518351   | 0.9740 | 45621939 | G | T | 0.20 | 3.98E-06 | 2.21E-02 | 4.58E-02 |
| rs55708341 | Brain_Putamen_basal_ganglia           | 21 | <i>LRRC3DN</i>    | 45880946 | rs56299324  | 0.9740 | 45622609 | G | A | 0.20 | 7.67E-06 | 4.22E-02 | 7.08E-02 |
| rs55708341 | Brain_Putamen_basal_ganglia           | 21 | <i>LRRC3DN</i>    | 45880946 | rs56132007  | 0.9740 | 45622705 | A | G | 0.20 | 6.83E-06 | 4.22E-02 | 7.06E-02 |
| rs55708341 | Brain_Putamen_basal_ganglia           | 21 | <i>LRRC3DN</i>    | 45880946 | rs55965762  | 0.9740 | 45622816 | T | A | 0.20 | 6.83E-06 | 4.22E-02 | 7.06E-02 |
| rs55708341 | Brain_Putamen_basal_ganglia           | 21 | <i>LRRC3DN</i>    | 45880946 | rs55736164  | 0.9804 | 45622925 | C | G | 0.20 | 6.83E-06 | 3.86E-02 | 6.66E-02 |
| rs55708341 | Brain_Putamen_basal_ganglia           | 21 | <i>LRRC3DN</i>    | 45880946 | rs62228216  | 0.9804 | 45623518 | T | C | 0.20 | 6.83E-06 | 4.14E-02 | 6.97E-02 |
| rs55708341 | Brain_Putamen_basal_ganglia           | 21 | <i>LRRC3DN</i>    | 45880946 | rs56178904  | 0.9740 | 45624551 | T | C | 0.20 | 7.10E-06 | 4.43E-02 | 7.31E-02 |
| rs55708341 | Brain_Putamen_basal_ganglia           | 21 | <i>SUMO3</i>      | 46232113 | rs56178904  | 0.9740 | 45624551 | T | C | 0.20 | 7.10E-06 | 4.90E-02 | 7.81E-02 |
| rs55708341 | Brain_Putamen_basal_ganglia           | 21 | <i>LRRC3DN</i>    | 45880946 | rs3746959   | 0.9804 | 45625253 | A | G | 0.20 | 5.99E-06 | 4.50E-02 | 7.32E-02 |
| rs55708341 | Brain_Putamen_basal_ganglia           | 21 | <i>SUMO3</i>      | 46232113 | rs55708341  | 1.0000 | 45627581 | T | A | 0.20 | 2.51E-06 | 3.26E-02 | 5.71E-02 |
| rs55708341 | Brain_Putamen_basal_ganglia           | 21 | <i>SUMO3</i>      | 46232113 | rs58911644  | 0.9869 | 45629121 | T | A | 0.20 | 2.96E-06 | 3.26E-02 | 5.77E-02 |
| rs55708341 | Brain_Spinal_cord_cervical_c-1        | 21 | <i>AP001058.3</i> | 45626845 | rs58139755  | 0.9415 | 45618128 | G | T | 0.20 | 2.00E-04 | 3.64E-02 | 8.81E-02 |

|            |                                |    |            |          |            |        |          |   |   |      |          |          |          |
|------------|--------------------------------|----|------------|----------|------------|--------|----------|---|---|------|----------|----------|----------|
| rs55708341 | Brain_Spinal_cord_cervical_c-1 | 21 | AP001058.3 | 45626845 | s113526534 | 0.9545 | 45621230 | A | G | 0.20 | 2.01E-05 | 3.64E-02 | 6.85E-02 |
| rs55708341 | Brain_Spinal_cord_cervical_c-1 | 21 | AP001058.3 | 45626845 | rs62228210 | 0.9545 | 45621292 | C | G | 0.20 | 2.01E-05 | 3.64E-02 | 6.85E-02 |
| rs55708341 | Brain_Spinal_cord_cervical_c-1 | 21 | AP001058.3 | 45626845 | rs6518350  | 0.9740 | 45621817 | G | A | 0.20 | 5.13E-06 | 3.64E-02 | 6.31E-02 |
| rs55708341 | Brain_Spinal_cord_cervical_c-1 | 21 | AP001058.3 | 45626845 | rs6518351  | 0.9740 | 45621939 | G | T | 0.20 | 3.98E-06 | 3.64E-02 | 6.25E-02 |
| rs55708341 | Brain_Spinal_cord_cervical_c-1 | 21 | LINC00313  | 44890694 | rs3746959  | 0.9804 | 45625253 | A | G | 0.20 | 5.99E-06 | 3.41E-02 | 6.13E-02 |
| rs55708341 | Brain_Substantia_nigra         | 21 | AP001056.1 | 45595854 | rs59380543 | 0.9415 | 45617996 | T | C | 0.20 | 1.09E-05 | 2.51E-02 | 5.25E-02 |
| rs55708341 | Brain_Substantia_nigra         | 21 | TSPEAR-AS1 | 45931214 | rs59380543 | 0.9415 | 45617996 | T | C | 0.20 | 1.09E-05 | 4.99E-02 | 8.02E-02 |
| rs55708341 | Brain_Substantia_nigra         | 21 | C21orf90   | 45941467 | rs59380543 | 0.9415 | 45617996 | T | C | 0.20 | 1.09E-05 | 2.06E-02 | 4.69E-02 |
| rs55708341 | Brain_Substantia_nigra         | 21 | LINC00163  | 46411890 | rs59380543 | 0.9415 | 45617996 | T | C | 0.20 | 1.09E-05 | 3.66E-02 | 6.59E-02 |
| rs55708341 | Brain_Substantia_nigra         | 21 | AP001505.9 | 46414688 | rs59380543 | 0.9415 | 45617996 | T | C | 0.20 | 1.09E-05 | 1.95E-02 | 4.55E-02 |
| rs55708341 | Brain_Substantia_nigra         | 21 | C21orf90   | 45941467 | s113526534 | 0.9545 | 45621230 | A | G | 0.20 | 2.01E-05 | 3.92E-02 | 7.16E-02 |
| rs55708341 | Brain_Substantia_nigra         | 21 | C21orf90   | 45941467 | rs62228210 | 0.9545 | 45621292 | C | G | 0.20 | 2.01E-05 | 3.92E-02 | 7.16E-02 |
| rs55708341 | Brain_Substantia_nigra         | 21 | AIRE       | 45711932 | rs6518350  | 0.9740 | 45621817 | G | A | 0.20 | 5.13E-06 | 4.87E-02 | 7.63E-02 |
| rs55708341 | Brain_Substantia_nigra         | 21 | AIRE       | 45711932 | rs6518351  | 0.9740 | 45621939 | G | T | 0.20 | 3.98E-06 | 4.87E-02 | 7.57E-02 |
| rs55708341 | Brain_Substantia_nigra         | 21 | AP001056.1 | 45595854 | rs55708341 | 1.0000 | 45627581 | T | A | 0.20 | 2.51E-06 | 4.07E-02 | 6.60E-02 |
| rs55708341 | Brain_Substantia_nigra         | 21 | AP001056.1 | 45595854 | rs58911644 | 0.9869 | 45629121 | T | A | 0.20 | 2.96E-06 | 4.07E-02 | 6.66E-02 |
| rs55708341 | Whole_Blood                    | 21 | AP001046.5 | 44780128 | rs59380543 | 0.9415 | 45617996 | T | C | 0.20 | 1.09E-05 | 4.15E-02 | 7.13E-02 |
| rs55708341 | Whole_Blood                    | 21 | AP001046.5 | 44780128 | rs58139755 | 0.9415 | 45618128 | G | T | 0.20 | 2.00E-04 | 4.41E-02 | 9.66E-02 |
| rs55708341 | Whole_Blood                    | 21 | RRP1B      | 45097693 | rs55708341 | 1.0000 | 45627581 | T | A | 0.20 | 2.51E-06 | 4.30E-02 | 6.84E-02 |
| rs55708341 | Whole_Blood                    | 21 | RRP1B      | 45097693 | rs58911644 | 0.9869 | 45629121 | T | A | 0.20 | 2.96E-06 | 4.30E-02 | 6.91E-02 |
| rs9831119  | Brain_Amygdala                 | 3  | CADM2      | 85565855 | rs72907315 | 0.9653 | 84681958 | T | G | 0.12 | 8.57E-05 | 8.28E-03 | 3.43E-02 |
| rs9831119  | Brain_Amygdala                 | 3  | CADM2      | 85565855 | rs4856537  | 0.8395 | 84685281 | A | T | 0.10 | 3.63E-04 | 2.13E-02 | 6.44E-02 |
| rs9831119  | Brain_Amygdala                 | 3  | CADM2      | 85565855 | rs76468827 | 0.8510 | 84690197 | T | G | 0.10 | 2.46E-04 | 2.13E-02 | 5.74E-02 |
| rs9831119  | Brain_Amygdala                 | 3  | CADM2      | 85565855 | rs11127858 | 0.8510 | 84695356 | T | C | 0.10 | 2.61E-04 | 2.13E-02 | 5.76E-02 |
| rs9831119  | Brain_Amygdala                 | 3  | CADM2      | 85565855 | rs11918179 | 1.0000 | 84704503 | T | C | 0.13 | 2.77E-05 | 3.37E-03 | 1.81E-02 |
| rs9831119  | Brain_Amygdala                 | 3  | CADM2      | 85565855 | rs9866055  | 1.0000 | 84705135 | G | A | 0.13 | 5.56E-06 | 2.34E-03 | 1.23E-02 |
| rs9831119  | Brain_Amygdala                 | 3  | CADM2      | 85565855 | rs9816303  | 1.0000 | 84705806 | C | A | 0.13 | 3.74E-06 | 3.79E-03 | 1.51E-02 |
| rs9831119  | Brain_Amygdala                 | 3  | CADM2      | 85565855 | rs72907370 | 0.8510 | 84707037 | C | T | 0.10 | 1.65E-05 | 2.13E-02 | 4.40E-02 |
| rs9831119  | Brain_Amygdala                 | 3  | CADM2      | 85565855 | rs9809351  | 1.0000 | 84707686 | C | T | 0.13 | 3.74E-06 | 2.34E-03 | 1.18E-02 |
| rs9831119  | Brain_Amygdala                 | 3  | CADM2      | 85565855 | rs9809799  | 1.0000 | 84707940 | C | T | 0.13 | 3.74E-06 | 2.34E-03 | 1.18E-02 |
| rs9831119  | Brain_Amygdala                 | 3  | CADM2      | 85565855 | rs9870836  | 1.0000 | 84709251 | T | C | 0.13 | 3.55E-06 | 2.34E-03 | 1.18E-02 |
| rs9831119  | Brain_Amygdala                 | 3  | CADM2      | 85565855 | rs9819597  | 1.0000 | 84709515 | C | T | 0.13 | 3.74E-06 | 2.34E-03 | 1.18E-02 |
| rs9831119  | Brain_Amygdala                 | 3  | CADM2      | 85565855 | rs72487709 | 1.0000 | 84710808 | G | A | 0.13 | 4.67E-06 | 2.34E-03 | 1.22E-02 |
| rs9831119  | Brain_Amygdala                 | 3  | CADM2      | 85565855 | rs9881643  | 1.0000 | 84711164 | A | G | 0.13 | 3.81E-06 | 2.34E-03 | 1.18E-02 |
| rs9831119  | Brain_Amygdala                 | 3  | CADM2      | 85565855 | rs9811523  | 1.0000 | 84712018 | C | G | 0.13 | 3.81E-06 | 2.34E-03 | 1.18E-02 |
| rs9831119  | Brain_Amygdala                 | 3  | CADM2      | 85565855 | rs9831119  | 1.0000 | 84712077 | C | T | 0.13 | 2.98E-06 | 1.50E-03 | 9.29E-03 |
| rs9831119  | Brain_Amygdala                 | 3  | CADM2      | 85565855 | rs9816064  | 1.0000 | 84712805 | A | C | 0.13 | 3.81E-06 | 1.19E-02 | 2.84E-02 |
| rs9831119  | Brain_Amygdala                 | 3  | CADM2      | 85565855 | rs11127860 | 1.0000 | 84713028 | G | A | 0.13 | 3.81E-06 | 2.88E-03 | 1.31E-02 |
| rs9831119  | Brain_Amygdala                 | 3  | CADM2      | 85565855 | rs11921076 | 0.9885 | 84713974 | C | T | 0.13 | 3.50E-06 | 6.81E-03 | 2.05E-02 |
| rs9831119  | Brain_Amygdala                 | 3  | CADM2      | 85565855 | rs77137058 | 0.8282 | 84747357 | G | A | 0.10 | 5.44E-05 | 2.13E-02 | 4.70E-02 |

|           |                                      |    |            |           |            |        |           |   |   |      |          |          |          |
|-----------|--------------------------------------|----|------------|-----------|------------|--------|-----------|---|---|------|----------|----------|----------|
| rs9831119 | Brain_Cortex                         | 3  | CADM2      | 85565855  | rs72907315 | 0.9653 | 84681958  | T | G | 0.12 | 8.57E-05 | 5.61E-03 | 2.91E-02 |
| rs9831119 | Brain_Cortex                         | 3  | CADM2      | 85565855  | rs4856537  | 0.8395 | 84685281  | A | T | 0.10 | 3.63E-04 | 1.07E-02 | 4.86E-02 |
| rs9831119 | Brain_Cortex                         | 3  | CADM2      | 85565855  | rs76468827 | 0.8510 | 84690197  | T | G | 0.10 | 2.46E-04 | 1.25E-02 | 4.48E-02 |
| rs9831119 | Brain_Cortex                         | 3  | CADM2      | 85565855  | rs11127858 | 0.8510 | 84695356  | T | C | 0.10 | 2.61E-04 | 1.25E-02 | 4.50E-02 |
| rs9831119 | Brain_Cortex                         | 3  | CADM2      | 85565855  | rs11918179 | 1.0000 | 84704503  | T | C | 0.13 | 2.77E-05 | 1.05E-02 | 3.12E-02 |
| rs9831119 | Brain_Cortex                         | 3  | CADM2      | 85565855  | rs9866055  | 1.0000 | 84705135  | G | A | 0.13 | 5.56E-06 | 8.36E-03 | 2.37E-02 |
| rs9831119 | Brain_Cortex                         | 3  | CADM2      | 85565855  | rs9816303  | 1.0000 | 84705806  | C | A | 0.13 | 3.74E-06 | 3.25E-02 | 5.36E-02 |
| rs9831119 | Brain_Cortex                         | 3  | CADM2      | 85565855  | rs72907370 | 0.8510 | 84707037  | C | T | 0.10 | 1.65E-05 | 3.61E-02 | 6.12E-02 |
| rs9831119 | Brain_Cortex                         | 3  | CADM2      | 85565855  | rs9809351  | 1.0000 | 84707686  | C | T | 0.13 | 3.74E-06 | 3.25E-02 | 5.36E-02 |
| rs9831119 | Brain_Cortex                         | 3  | CADM2      | 85565855  | rs9809799  | 1.0000 | 84707940  | C | T | 0.13 | 3.74E-06 | 3.25E-02 | 5.36E-02 |
| rs9831119 | Brain_Cortex                         | 3  | CADM2      | 85565855  | rs9870836  | 1.0000 | 84709251  | T | C | 0.13 | 3.55E-06 | 3.25E-02 | 5.36E-02 |
| rs9831119 | Brain_Cortex                         | 3  | CADM2      | 85565855  | rs9819597  | 1.0000 | 84709515  | C | T | 0.13 | 3.74E-06 | 3.25E-02 | 5.36E-02 |
| rs9831119 | Brain_Cortex                         | 3  | CADM2      | 85565855  | rs72487709 | 1.0000 | 84710808  | G | A | 0.13 | 4.67E-06 | 3.25E-02 | 5.42E-02 |
| rs9831119 | Brain_Cortex                         | 3  | CADM2      | 85565855  | rs9881643  | 1.0000 | 84711164  | A | G | 0.13 | 3.81E-06 | 3.15E-02 | 5.26E-02 |
| rs9831119 | Brain_Cortex                         | 3  | CADM2      | 85565855  | rs9811523  | 1.0000 | 84712018  | C | G | 0.13 | 3.81E-06 | 3.25E-02 | 5.37E-02 |
| rs9831119 | Brain_Cortex                         | 3  | CADM2      | 85565855  | rs9831119  | 1.0000 | 84712077  | C | T | 0.13 | 2.98E-06 | 2.43E-02 | 4.37E-02 |
| rs9831119 | Brain_Cortex                         | 3  | CADM2      | 85565855  | rs9816064  | 1.0000 | 84712805  | A | C | 0.13 | 3.81E-06 | 2.75E-02 | 4.80E-02 |
| rs9831119 | Brain_Cortex                         | 3  | CADM2      | 85565855  | rs11127860 | 1.0000 | 84713028  | G | A | 0.13 | 3.81E-06 | 3.91E-02 | 6.10E-02 |
| rs9831119 | Brain_Cortex                         | 3  | CADM2      | 85565855  | rs11921076 | 0.9885 | 84713974  | C | T | 0.13 | 3.50E-06 | 1.62E-02 | 3.41E-02 |
| rs9831119 | Brain_Cortex                         | 3  | CADM2      | 85565855  | rs77137058 | 0.8282 | 84747357  | G | A | 0.10 | 5.44E-05 | 1.49E-02 | 3.85E-02 |
| rs9531483 | Brain_Frontal_Cortex_BA9             | 13 | SLITRK1    | 84453936  | rs2329283  | 0.8623 | 84218239  | T | A | 0.72 | 3.41E-04 | 4.83E-02 | 8.53E-02 |
| rs9531483 | Brain_Frontal_Cortex_BA9             | 13 | SLITRK1    | 84453936  | rs9546467  | 0.9754 | 84223852  | A | G | 0.70 | 9.48E-06 | 4.99E-02 | 7.53E-02 |
| rs6722000 | Brain_Amygdala                       | 2  | PLEKHM3    | 208791655 | rs9967885  | 0.9647 | 209067275 | G | A | 0.79 | 4.71E-05 | 1.93E-02 | 4.41E-02 |
| rs6722000 | Brain_Amygdala                       | 2  | PLEKHM3    | 208791655 | rs6731294  | 0.9765 | 209071325 | A | G | 0.79 | 1.95E-05 | 4.42E-02 | 7.01E-02 |
| rs6722000 | Brain_Amygdala                       | 2  | PLEKHM3    | 208791655 | rs6731295  | 0.9765 | 209071327 | A | G | 0.79 | 1.95E-05 | 4.42E-02 | 7.01E-02 |
| rs6722000 | Brain_Amygdala                       | 2  | PLEKHM3    | 208791655 | rs13025862 | 0.9881 | 209072106 | T | C | 0.79 | 1.85E-05 | 1.93E-02 | 4.12E-02 |
| rs6722000 | Brain_Amygdala                       | 2  | PLEKHM3    | 208791655 | rs13387151 | 0.9881 | 209074635 | C | A | 0.22 | 1.39E-05 | 1.04E-02 | 2.99E-02 |
| rs6722000 | Brain_Amygdala                       | 2  | PLEKHM3    | 208791655 | rs12623549 | 0.9881 | 209075793 | C | T | 0.79 | 8.32E-06 | 2.07E-02 | 4.25E-02 |
| rs6722000 | Brain_Amygdala                       | 2  | PLEKHM3    | 208791655 | rs12474494 | 0.9702 | 209076580 | A | G | 0.79 | 2.12E-05 | 2.54E-02 | 4.95E-02 |
| rs6722000 | Brain_Anterior_cingulate_cortex_BA24 | 2  | AC096772.6 | 208686753 | rs9967885  | 0.9647 | 209067275 | G | A | 0.79 | 4.71E-05 | 5.04E-03 | 2.23E-02 |
| rs6722000 | Brain_Anterior_cingulate_cortex_BA24 | 2  | AC096772.6 | 208686753 | rs6731294  | 0.9765 | 209071325 | A | G | 0.79 | 1.95E-05 | 5.27E-03 | 2.05E-02 |
| rs6722000 | Brain_Anterior_cingulate_cortex_BA24 | 2  | AC096772.6 | 208686753 | rs6731295  | 0.9765 | 209071327 | A | G | 0.79 | 1.95E-05 | 5.27E-03 | 2.05E-02 |
| rs6722000 | Brain_Anterior_cingulate_cortex_BA24 | 2  | AC096772.6 | 208686753 | rs13025862 | 0.9881 | 209072106 | T | C | 0.79 | 1.85E-05 | 5.04E-03 | 1.99E-02 |
| rs6722000 | Brain_Anterior_cingulate_cortex_BA24 | 2  | AC096772.6 | 208686753 | rs13387151 | 0.9881 | 209074635 | C | A | 0.22 | 1.39E-05 | 6.62E-03 | 2.37E-02 |
| rs6722000 | Brain_Anterior_cingulate_cortex_BA24 | 2  | AC096772.6 | 208686753 | rs12623549 | 0.9881 | 209075793 | C | T | 0.79 | 8.32E-06 | 5.04E-03 | 1.95E-02 |
| rs6722000 | Brain_Anterior_cingulate_cortex_BA24 | 2  | AC096772.6 | 208686753 | rs6722000  | 1.0000 | 209075957 | G | A | 0.21 | 4.96E-06 | 7.00E-03 | 2.15E-02 |
| rs6722000 | Brain_Anterior_cingulate_cortex_BA24 | 2  | AC096772.6 | 208686753 | rs12474494 | 0.9702 | 209076580 | A | G | 0.79 | 2.12E-05 | 5.04E-03 | 2.05E-02 |
| rs6722000 | Brain_Caudate_basal_ganglia          | 2  | CREB1      | 208431337 | rs6722000  | 1.0000 | 209075957 | G | A | 0.21 | 4.96E-06 | 2.49E-02 | 4.57E-02 |
| rs6722000 | Brain_Cerebellar_Hemisphere          | 2  | CREB1      | 208431337 | rs9967885  | 0.9647 | 209067275 | G | A | 0.79 | 4.71E-05 | 4.40E-02 | 7.28E-02 |
| rs6722000 | Brain_Cerebellar_Hemisphere          | 2  | CREB1      | 208431337 | rs6731294  | 0.9765 | 209071325 | A | G | 0.79 | 1.95E-05 | 4.81E-02 | 7.42E-02 |



|           |                             |   |                 |           |            |        |           |   |   |      |          |          |          |
|-----------|-----------------------------|---|-----------------|-----------|------------|--------|-----------|---|---|------|----------|----------|----------|
| rs6722000 | Brain_Cerebellar_Hemisphere | 2 | <i>CREB1</i>    | 208431337 | rs6731295  | 0.9765 | 209071327 | A | G | 0.79 | 1.95E-05 | 4.81E-02 | 7.42E-02 |
| rs6722000 | Brain_Cerebellar_Hemisphere | 2 | <i>CREB1</i>    | 208431337 | rs13025862 | 0.9881 | 209072106 | T | C | 0.79 | 1.85E-05 | 3.80E-02 | 6.32E-02 |
| rs6722000 | Brain_Cerebellar_Hemisphere | 2 | <i>CREB1</i>    | 208431337 | rs12623549 | 0.9881 | 209075793 | C | T | 0.79 | 8.32E-06 | 4.29E-02 | 6.79E-02 |
| rs6722000 | Brain_Cerebellar_Hemisphere | 2 | <i>CREB1</i>    | 208431337 | rs12474494 | 0.9702 | 209076580 | A | G | 0.79 | 2.12E-05 | 4.84E-02 | 7.52E-02 |
| rs6722000 | Brain_Cerebellum            | 2 | <i>C2orf80</i>  | 209042432 | rs9967885  | 0.9647 | 209067275 | G | A | 0.79 | 4.71E-05 | 3.73E-02 | 6.55E-02 |
| rs6722000 | Brain_Cerebellum            | 2 | <i>PIKFYVE</i>  | 209177233 | rs9967885  | 0.9647 | 209067275 | G | A | 0.79 | 4.71E-05 | 3.35E-02 | 6.13E-02 |
| rs6722000 | Brain_Cerebellum            | 2 | <i>C2orf80</i>  | 209042432 | rs6731294  | 0.9765 | 209071325 | A | G | 0.79 | 1.95E-05 | 1.15E-02 | 3.08E-02 |
| rs6722000 | Brain_Cerebellum            | 2 | <i>PIKFYVE</i>  | 209177233 | rs6731294  | 0.9765 | 209071325 | A | G | 0.79 | 1.95E-05 | 1.31E-02 | 3.32E-02 |
| rs6722000 | Brain_Cerebellum            | 2 | <i>C2orf80</i>  | 209042432 | rs6731295  | 0.9765 | 209071327 | A | G | 0.79 | 1.95E-05 | 1.15E-02 | 3.08E-02 |
| rs6722000 | Brain_Cerebellum            | 2 | <i>PIKFYVE</i>  | 209177233 | rs6731295  | 0.9765 | 209071327 | A | G | 0.79 | 1.95E-05 | 1.31E-02 | 3.32E-02 |
| rs6722000 | Brain_Cerebellum            | 2 | <i>C2orf80</i>  | 209042432 | rs13025862 | 0.9881 | 209072106 | T | C | 0.79 | 1.85E-05 | 1.80E-02 | 3.96E-02 |
| rs6722000 | Brain_Cerebellum            | 2 | <i>C2orf80</i>  | 209042432 | rs13387151 | 0.9881 | 209074635 | C | A | 0.22 | 1.39E-05 | 9.02E-03 | 2.78E-02 |
| rs6722000 | Brain_Cerebellum            | 2 | <i>C2orf80</i>  | 209042432 | rs12623549 | 0.9881 | 209075793 | C | T | 0.79 | 8.32E-06 | 3.05E-02 | 5.42E-02 |
| rs6722000 | Brain_Cerebellum            | 2 | <i>PIKFYVE</i>  | 209177233 | rs12623549 | 0.9881 | 209075793 | C | T | 0.79 | 8.32E-06 | 1.75E-02 | 3.84E-02 |
| rs6722000 | Brain_Cerebellum            | 2 | <i>C2orf80</i>  | 209042432 | rs6722000  | 1.0000 | 209075957 | G | A | 0.21 | 4.96E-06 | 6.70E-03 | 2.10E-02 |
| rs6722000 | Brain_Cerebellum            | 2 | <i>PIKFYVE</i>  | 209177233 | rs6722000  | 1.0000 | 209075957 | G | A | 0.21 | 4.96E-06 | 2.27E-02 | 4.31E-02 |
| rs6722000 | Brain_Cerebellum            | 2 | <i>C2orf80</i>  | 209042432 | rs12474494 | 0.9702 | 209076580 | A | G | 0.79 | 2.12E-05 | 2.32E-02 | 4.69E-02 |
| rs6722000 | Brain_Cerebellum            | 2 | <i>PIKFYVE</i>  | 209177233 | rs12474494 | 0.9702 | 209076580 | A | G | 0.79 | 2.12E-05 | 2.33E-02 | 4.70E-02 |
| rs6722000 | Brain_Cortex                | 2 | <i>IDH1-AS1</i> | 209120438 | rs9967885  | 0.9647 | 209067275 | G | A | 0.79 | 4.71E-05 | 2.56E-03 | 1.66E-02 |
| rs6722000 | Brain_Cortex                | 2 | <i>C2orf80</i>  | 209042432 | rs6731294  | 0.9765 | 209071325 | A | G | 0.79 | 1.95E-05 | 4.15E-02 | 6.72E-02 |
| rs6722000 | Brain_Cortex                | 2 | <i>IDH1-AS1</i> | 209120438 | rs6731294  | 0.9765 | 209071325 | A | G | 0.79 | 1.95E-05 | 6.45E-03 | 2.27E-02 |
| rs6722000 | Brain_Cortex                | 2 | <i>C2orf80</i>  | 209042432 | rs6731295  | 0.9765 | 209071327 | A | G | 0.79 | 1.95E-05 | 4.15E-02 | 6.72E-02 |
| rs6722000 | Brain_Cortex                | 2 | <i>IDH1-AS1</i> | 209120438 | rs6731295  | 0.9765 | 209071327 | A | G | 0.79 | 1.95E-05 | 6.45E-03 | 2.27E-02 |
| rs6722000 | Brain_Cortex                | 2 | <i>IDH1-AS1</i> | 209120438 | rs13025862 | 0.9881 | 209072106 | T | C | 0.79 | 1.85E-05 | 5.07E-03 | 2.00E-02 |
| rs6722000 | Brain_Cortex                | 2 | <i>IDH1-AS1</i> | 209120438 | rs13387151 | 0.9881 | 209074635 | C | A | 0.22 | 1.39E-05 | 2.85E-03 | 1.60E-02 |
| rs6722000 | Brain_Cortex                | 2 | <i>C2orf80</i>  | 209042432 | rs12623549 | 0.9881 | 209075793 | C | T | 0.79 | 8.32E-06 | 4.48E-02 | 7.00E-02 |
| rs6722000 | Brain_Cortex                | 2 | <i>IDH1-AS1</i> | 209120438 | rs12623549 | 0.9881 | 209075793 | C | T | 0.79 | 8.32E-06 | 4.51E-03 | 1.85E-02 |
| rs6722000 | Brain_Cortex                | 2 | <i>IDH1-AS1</i> | 209120438 | rs6722000  | 1.0000 | 209075957 | G | A | 0.21 | 4.96E-06 | 4.81E-03 | 1.76E-02 |
| rs6722000 | Brain_Cortex                | 2 | <i>IDH1-AS1</i> | 209120438 | rs12474494 | 0.9702 | 209076580 | A | G | 0.79 | 2.12E-05 | 2.71E-03 | 1.54E-02 |
| rs6722000 | Brain_Hippocampus           | 2 | <i>PTH2R</i>    | 209471832 | rs9967885  | 0.9647 | 209067275 | G | A | 0.79 | 4.71E-05 | 4.52E-02 | 7.41E-02 |
| rs6722000 | Brain_Hippocampus           | 2 | <i>IDH1-AS1</i> | 209120438 | rs13387151 | 0.9881 | 209074635 | C | A | 0.22 | 1.39E-05 | 4.41E-02 | 7.10E-02 |
| rs6722000 | Brain_Hippocampus           | 2 | <i>PIKFYVE</i>  | 209177233 | rs12623549 | 0.9881 | 209075793 | C | T | 0.79 | 8.32E-06 | 1.98E-02 | 4.14E-02 |
| rs6722000 | Brain_Hippocampus           | 2 | <i>PTH2R</i>    | 209471832 | rs12623549 | 0.9881 | 209075793 | C | T | 0.79 | 8.32E-06 | 2.06E-02 | 4.24E-02 |
| rs6722000 | Brain_Hippocampus           | 2 | <i>IDH1-AS1</i> | 209120438 | rs6722000  | 1.0000 | 209075957 | G | A | 0.21 | 4.96E-06 | 1.65E-02 | 3.54E-02 |
| rs6722000 | Brain_Hippocampus           | 2 | <i>PIKFYVE</i>  | 209177233 | rs12474494 | 0.9702 | 209076580 | A | G | 0.79 | 2.12E-05 | 1.92E-02 | 4.19E-02 |
| rs6722000 | Brain_Hippocampus           | 2 | <i>PTH2R</i>    | 209471832 | rs12474494 | 0.9702 | 209076580 | A | G | 0.79 | 2.12E-05 | 1.50E-02 | 3.63E-02 |
| rs6722000 | Brain_Hypothalamus          | 2 | <i>PTH2R</i>    | 209471832 | rs9967885  | 0.9647 | 209067275 | G | A | 0.79 | 4.71E-05 | 2.68E-02 | 5.35E-02 |
| rs6722000 | Brain_Hypothalamus          | 2 | <i>PTH2R</i>    | 209471832 | rs6731294  | 0.9765 | 209071325 | A | G | 0.79 | 1.95E-05 | 2.23E-02 | 4.52E-02 |
| rs6722000 | Brain_Hypothalamus          | 2 | <i>PTH2R</i>    | 209471832 | rs6731295  | 0.9765 | 209071327 | A | G | 0.79 | 1.95E-05 | 2.23E-02 | 4.52E-02 |
| rs6722000 | Brain_Hypothalamus          | 2 | <i>PTH2R</i>    | 209471832 | rs13025862 | 0.9881 | 209072106 | T | C | 0.79 | 1.85E-05 | 4.55E-02 | 7.12E-02 |

|            |                                       |   |                   |           |            |        |           |   |   |      |          |          |          |
|------------|---------------------------------------|---|-------------------|-----------|------------|--------|-----------|---|---|------|----------|----------|----------|
| rs6722000  | Brain_Hypothalamus                    | 2 | <i>PTH2R</i>      | 209471832 | rs13387151 | 0.9881 | 209074635 | C | A | 0.22 | 1.39E-05 | 3.06E-02 | 5.60E-02 |
| rs6722000  | Brain_Hypothalamus                    | 2 | <i>PTH2R</i>      | 209471832 | rs12623549 | 0.9881 | 209075793 | C | T | 0.79 | 8.32E-06 | 2.74E-02 | 5.06E-02 |
| rs6722000  | Brain_Hypothalamus                    | 2 | <i>PTH2R</i>      | 209471832 | rs6722000  | 1.0000 | 209075957 | G | A | 0.21 | 4.96E-06 | 3.53E-02 | 5.77E-02 |
| rs6722000  | Brain_Hypothalamus                    | 2 | <i>PTH2R</i>      | 209471832 | rs12474494 | 0.9702 | 209076580 | A | G | 0.79 | 2.12E-05 | 2.38E-02 | 4.76E-02 |
| rs6722000  | Brain_Nucleus_accumbens_basal_ganglia | 2 | <i>PIKFYVE</i>    | 209177233 | rs9967885  | 0.9647 | 209067275 | G | A | 0.79 | 4.71E-05 | 3.24E-02 | 6.00E-02 |
| rs6722000  | Brain_Nucleus_accumbens_basal_ganglia | 2 | <i>PIKFYVE</i>    | 209177233 | rs6731294  | 0.9765 | 209071325 | A | G | 0.79 | 1.95E-05 | 3.03E-02 | 5.47E-02 |
| rs6722000  | Brain_Nucleus_accumbens_basal_ganglia | 2 | <i>PIKFYVE</i>    | 209177233 | rs6731295  | 0.9765 | 209071327 | A | G | 0.79 | 1.95E-05 | 3.03E-02 | 5.47E-02 |
| rs6722000  | Brain_Nucleus_accumbens_basal_ganglia | 2 | <i>PIKFYVE</i>    | 209177233 | rs13025862 | 0.9881 | 209072106 | T | C | 0.79 | 1.85E-05 | 4.41E-02 | 6.97E-02 |
| rs6722000  | Brain_Nucleus_accumbens_basal_ganglia | 2 | <i>PIKFYVE</i>    | 209177233 | rs12623549 | 0.9881 | 209075793 | C | T | 0.79 | 8.32E-06 | 4.98E-02 | 7.52E-02 |
| rs6722000  | Brain_Substantia_nigra                | 2 | <i>CCNYL1</i>     | 208601413 | rs9967885  | 0.9647 | 209067275 | G | A | 0.79 | 4.71E-05 | 4.84E-02 | 7.75E-02 |
| rs6722000  | Brain_Substantia_nigra                | 2 | <i>CRYGEP</i>     | 208975096 | rs9967885  | 0.9647 | 209067275 | G | A | 0.79 | 4.71E-05 | 4.27E-02 | 7.14E-02 |
| rs6722000  | Brain_Substantia_nigra                | 2 | <i>CCNYL1</i>     | 208601413 | rs6731294  | 0.9765 | 209071325 | A | G | 0.79 | 1.95E-05 | 4.14E-02 | 6.71E-02 |
| rs6722000  | Brain_Substantia_nigra                | 2 | <i>CRYGEP</i>     | 208975096 | rs6731294  | 0.9765 | 209071325 | A | G | 0.79 | 1.95E-05 | 2.40E-02 | 4.72E-02 |
| rs6722000  | Brain_Substantia_nigra                | 2 | <i>CCNYL1</i>     | 208601413 | rs6731295  | 0.9765 | 209071327 | A | G | 0.79 | 1.95E-05 | 4.14E-02 | 6.71E-02 |
| rs6722000  | Brain_Substantia_nigra                | 2 | <i>CRYGEP</i>     | 208975096 | rs6731295  | 0.9765 | 209071327 | A | G | 0.79 | 1.95E-05 | 2.40E-02 | 4.72E-02 |
| rs6722000  | Brain_Substantia_nigra                | 2 | <i>CCNYL1</i>     | 208601413 | rs13025862 | 0.9881 | 209072106 | T | C | 0.79 | 1.85E-05 | 3.22E-02 | 5.66E-02 |
| rs6722000  | Brain_Substantia_nigra                | 2 | <i>CRYGEP</i>     | 208975096 | rs13025862 | 0.9881 | 209072106 | T | C | 0.79 | 1.85E-05 | 3.15E-02 | 5.59E-02 |
| rs6722000  | Brain_Substantia_nigra                | 2 | <i>CRYGEP</i>     | 208975096 | rs13387151 | 0.9881 | 209074635 | C | A | 0.22 | 1.39E-05 | 2.64E-02 | 5.10E-02 |
| rs6722000  | Brain_Substantia_nigra                | 2 | <i>CRYGEP</i>     | 208975096 | rs12623549 | 0.9881 | 209075793 | C | T | 0.79 | 8.32E-06 | 4.02E-02 | 6.50E-02 |
| rs6722000  | Brain_Substantia_nigra                | 2 | <i>CRYGD</i>      | 208987778 | rs12623549 | 0.9881 | 209075793 | C | T | 0.79 | 8.32E-06 | 4.27E-02 | 6.78E-02 |
| rs6722000  | Brain_Substantia_nigra                | 2 | <i>CCNYL1</i>     | 208601413 | rs6722000  | 1.0000 | 209075957 | G | A | 0.21 | 4.96E-06 | 4.92E-02 | 7.26E-02 |
| rs6722000  | Brain_Substantia_nigra                | 2 | <i>CRYGEP</i>     | 208975096 | rs6722000  | 1.0000 | 209075957 | G | A | 0.21 | 4.96E-06 | 4.90E-02 | 7.24E-02 |
| rs6722000  | Whole_Blood                           | 2 | <i>AC007879.2</i> | 208076115 | rs6731294  | 0.9765 | 209071325 | A | G | 0.79 | 1.95E-05 | 4.70E-02 | 7.30E-02 |
| rs6722000  | Whole_Blood                           | 2 | <i>PIKFYVE</i>    | 209177233 | rs6731294  | 0.9765 | 209071325 | A | G | 0.79 | 1.95E-05 | 2.82E-02 | 5.23E-02 |
| rs6722000  | Whole_Blood                           | 2 | <i>AC007879.2</i> | 208076115 | rs6731295  | 0.9765 | 209071327 | A | G | 0.79 | 1.95E-05 | 4.70E-02 | 7.30E-02 |
| rs6722000  | Whole_Blood                           | 2 | <i>PIKFYVE</i>    | 209177233 | rs6731295  | 0.9765 | 209071327 | A | G | 0.79 | 1.95E-05 | 2.82E-02 | 5.23E-02 |
| rs6722000  | Whole_Blood                           | 2 | <i>PIKFYVE</i>    | 209177233 | rs12623549 | 0.9881 | 209075793 | C | T | 0.79 | 8.32E-06 | 1.87E-02 | 4.00E-02 |
| rs6722000  | Whole_Blood                           | 2 | <i>AC007879.2</i> | 208076115 | rs6722000  | 1.0000 | 209075957 | G | A | 0.21 | 4.96E-06 | 4.39E-02 | 6.70E-02 |
| rs6722000  | Whole_Blood                           | 2 | <i>PIKFYVE</i>    | 209177233 | rs6722000  | 1.0000 | 209075957 | G | A | 0.21 | 4.96E-06 | 1.08E-02 | 2.75E-02 |
| rs11923588 | Brain_Amygdala                        | 3 | <i>YEATS2-AS1</i> | 183526253 | rs9828886  | 0.9494 | 184449677 | T | C | 0.06 | 1.37E-05 | 9.55E-03 | 2.37E-02 |
| rs11923588 | Brain_Amygdala                        | 3 | <i>PARL</i>       | 183574934 | rs9828886  | 0.9494 | 184449677 | T | C | 0.06 | 1.37E-05 | 4.43E-02 | 6.50E-02 |
| rs11923588 | Brain_Amygdala                        | 3 | <i>ABCC5</i>      | 183686762 | rs9828886  | 0.9494 | 184449677 | T | C | 0.06 | 1.37E-05 | 5.98E-03 | 1.81E-02 |
| rs11923588 | Brain_Amygdala                        | 3 | <i>CAMK2N2</i>    | 183978312 | rs9828886  | 0.9494 | 184449677 | T | C | 0.06 | 1.37E-05 | 3.59E-02 | 5.60E-02 |
| rs11923588 | Brain_Amygdala                        | 3 | <i>YEATS2-AS1</i> | 183526253 | rs12635235 | 0.8823 | 184459005 | G | C | 0.05 | 9.09E-05 | 6.23E-03 | 2.82E-02 |
| rs11923588 | Brain_Amygdala                        | 3 | <i>ABCC5</i>      | 183686762 | rs12635235 | 0.8823 | 184459005 | G | C | 0.05 | 9.09E-05 | 1.06E-02 | 3.59E-02 |
| rs11923588 | Brain_Amygdala                        | 3 | <i>CAMK2N2</i>    | 183978312 | rs12635235 | 0.8823 | 184459005 | G | C | 0.05 | 9.09E-05 | 2.46E-02 | 5.51E-02 |
| rs11923588 | Brain_Amygdala                        | 3 | <i>YEATS2-AS1</i> | 183526253 | rs4472033  | 1.0000 | 184459499 | A | G | 0.06 | 7.20E-06 | 7.92E-03 | 2.04E-02 |
| rs11923588 | Brain_Amygdala                        | 3 | <i>PARL</i>       | 183574934 | rs4472033  | 1.0000 | 184459499 | A | G | 0.06 | 7.20E-06 | 1.56E-02 | 3.11E-02 |
| rs11923588 | Brain_Amygdala                        | 3 | <i>ABCC5</i>      | 183686762 | rs4472033  | 1.0000 | 184459499 | A | G | 0.06 | 7.20E-06 | 3.63E-03 | 1.31E-02 |
| rs11923588 | Brain_Amygdala                        | 3 | <i>CAMK2N2</i>    | 183978312 | rs4472033  | 1.0000 | 184459499 | A | G | 0.06 | 7.20E-06 | 2.62E-02 | 4.40E-02 |

|            |                                      |   |              |           |            |        |           |   |   |      |          |          |          |
|------------|--------------------------------------|---|--------------|-----------|------------|--------|-----------|---|---|------|----------|----------|----------|
| rs11923588 | Brain_Amygdala                       | 3 | VPS8         | 184650166 | rs4472033  | 1.0000 | 184459499 | A | G | 0.06 | 7.20E-06 | 2.94E-02 | 4.77E-02 |
| rs11923588 | Brain_Amygdala                       | 3 | YEATS2-AS1   | 183526253 | rs11923588 | 1.0000 | 184459667 | T | C | 0.06 | 5.66E-06 | 7.92E-03 | 2.02E-02 |
| rs11923588 | Brain_Amygdala                       | 3 | PARL         | 183574934 | rs11923588 | 1.0000 | 184459667 | T | C | 0.06 | 5.66E-06 | 1.56E-02 | 3.08E-02 |
| rs11923588 | Brain_Amygdala                       | 3 | ABCC5        | 183686762 | rs11923588 | 1.0000 | 184459667 | T | C | 0.06 | 5.66E-06 | 3.63E-03 | 1.29E-02 |
| rs11923588 | Brain_Amygdala                       | 3 | CAMK2N2      | 183978312 | rs11923588 | 1.0000 | 184459667 | T | C | 0.06 | 5.66E-06 | 2.62E-02 | 4.37E-02 |
| rs11923588 | Brain_Amygdala                       | 3 | VPS8         | 184650166 | rs11923588 | 1.0000 | 184459667 | T | C | 0.06 | 5.66E-06 | 2.94E-02 | 4.74E-02 |
| rs11923588 | Brain_Anterior_cingulate_cortex_BA24 | 3 | YEATS2-AS1   | 183526253 | rs9828886  | 0.9494 | 184449677 | T | C | 0.06 | 1.37E-05 | 7.60E-03 | 2.07E-02 |
| rs11923588 | Brain_Anterior_cingulate_cortex_BA24 | 3 | ABCC5        | 183686762 | rs9828886  | 0.9494 | 184449677 | T | C | 0.06 | 1.37E-05 | 1.70E-02 | 3.38E-02 |
| rs11923588 | Brain_Anterior_cingulate_cortex_BA24 | 3 | SENP2        | 185325811 | rs9828886  | 0.9494 | 184449677 | T | C | 0.06 | 1.37E-05 | 4.93E-02 | 7.03E-02 |
| rs11923588 | Brain_Anterior_cingulate_cortex_BA24 | 3 | YEATS2-AS1   | 183526253 | rs12635235 | 0.8823 | 184459005 | G | C | 0.05 | 9.09E-05 | 9.82E-03 | 3.46E-02 |
| rs11923588 | Brain_Anterior_cingulate_cortex_BA24 | 3 | ABCC5        | 183686762 | rs12635235 | 0.8823 | 184459005 | G | C | 0.05 | 9.09E-05 | 1.30E-02 | 3.96E-02 |
| rs11923588 | Brain_Anterior_cingulate_cortex_BA24 | 3 | DVL3         | 183882287 | rs12635235 | 0.8823 | 184459005 | G | C | 0.05 | 9.09E-05 | 4.86E-02 | 8.22E-02 |
| rs11923588 | Brain_Anterior_cingulate_cortex_BA24 | 3 | VPS8         | 184650166 | rs12635235 | 0.8823 | 184459005 | G | C | 0.05 | 9.09E-05 | 2.52E-02 | 5.59E-02 |
| rs11923588 | Brain_Anterior_cingulate_cortex_BA24 | 3 | YEATS2-AS1   | 183526253 | rs4472033  | 1.0000 | 184459499 | A | G | 0.06 | 7.20E-06 | 1.68E-02 | 3.26E-02 |
| rs11923588 | Brain_Anterior_cingulate_cortex_BA24 | 3 | ABCC5        | 183686762 | rs4472033  | 1.0000 | 184459499 | A | G | 0.06 | 7.20E-06 | 8.10E-03 | 2.07E-02 |
| rs11923588 | Brain_Anterior_cingulate_cortex_BA24 | 3 | VPS8         | 184650166 | rs4472033  | 1.0000 | 184459499 | A | G | 0.06 | 7.20E-06 | 1.96E-02 | 3.61E-02 |
| rs11923588 | Brain_Anterior_cingulate_cortex_BA24 | 3 | YEATS2-AS1   | 183526253 | rs11923588 | 1.0000 | 184459667 | T | C | 0.06 | 5.66E-06 | 1.68E-02 | 3.23E-02 |
| rs11923588 | Brain_Anterior_cingulate_cortex_BA24 | 3 | ABCC5        | 183686762 | rs11923588 | 1.0000 | 184459667 | T | C | 0.06 | 5.66E-06 | 8.10E-03 | 2.05E-02 |
| rs11923588 | Brain_Anterior_cingulate_cortex_BA24 | 3 | VPS8         | 184650166 | rs11923588 | 1.0000 | 184459667 | T | C | 0.06 | 5.66E-06 | 1.96E-02 | 3.59E-02 |
| rs11923588 | Brain_Caudate_basal_ganglia          | 3 | EIF4G1       | 184042714 | rs9828886  | 0.9494 | 184449677 | T | C | 0.06 | 1.37E-05 | 2.30E-02 | 4.12E-02 |
| rs11923588 | Brain_Caudate_basal_ganglia          | 3 | FAM131A      | 184058843 | rs9828886  | 0.9494 | 184449677 | T | C | 0.06 | 1.37E-05 | 4.65E-02 | 6.74E-02 |
| rs11923588 | Brain_Caudate_basal_ganglia          | 3 | RP11-433C9.2 | 184138380 | rs9828886  | 0.9494 | 184449677 | T | C | 0.06 | 1.37E-05 | 3.36E-02 | 5.34E-02 |
| rs11923588 | Brain_Caudate_basal_ganglia          | 3 | C3orf70      | 184833320 | rs9828886  | 0.9494 | 184449677 | T | C | 0.06 | 1.37E-05 | 4.60E-02 | 6.68E-02 |
| rs11923588 | Brain_Caudate_basal_ganglia          | 3 | SENP2        | 185325811 | rs9828886  | 0.9494 | 184449677 | T | C | 0.06 | 1.37E-05 | 1.16E-02 | 2.67E-02 |
| rs11923588 | Brain_Caudate_basal_ganglia          | 3 | EIF4G1       | 184042714 | rs12635235 | 0.8823 | 184459005 | G | C | 0.05 | 9.09E-05 | 1.01E-02 | 3.50E-02 |
| rs11923588 | Brain_Caudate_basal_ganglia          | 3 | FAM131A      | 184058843 | rs12635235 | 0.8823 | 184459005 | G | C | 0.05 | 9.09E-05 | 4.55E-02 | 7.89E-02 |
| rs11923588 | Brain_Caudate_basal_ganglia          | 3 | YEATS2-AS1   | 183526253 | rs4472033  | 1.0000 | 184459499 | A | G | 0.06 | 7.20E-06 | 4.74E-02 | 6.72E-02 |
| rs11923588 | Brain_Caudate_basal_ganglia          | 3 | FAM131A      | 184058843 | rs4472033  | 1.0000 | 184459499 | A | G | 0.06 | 7.20E-06 | 3.06E-02 | 4.90E-02 |
| rs11923588 | Brain_Caudate_basal_ganglia          | 3 | SENP2        | 185325811 | rs4472033  | 1.0000 | 184459499 | A | G | 0.06 | 7.20E-06 | 1.91E-02 | 3.55E-02 |
| rs11923588 | Brain_Caudate_basal_ganglia          | 3 | YEATS2-AS1   | 183526253 | rs11923588 | 1.0000 | 184459667 | T | C | 0.06 | 5.66E-06 | 4.74E-02 | 6.69E-02 |
| rs11923588 | Brain_Caudate_basal_ganglia          | 3 | FAM131A      | 184058843 | rs11923588 | 1.0000 | 184459667 | T | C | 0.06 | 5.66E-06 | 3.06E-02 | 4.87E-02 |
| rs11923588 | Brain_Caudate_basal_ganglia          | 3 | SENP2        | 185325811 | rs11923588 | 1.0000 | 184459667 | T | C | 0.06 | 5.66E-06 | 1.91E-02 | 3.53E-02 |
| rs11923588 | Brain_Cerebellar_Hemisphere          | 3 | HSP90AA5P    | 183834413 | rs9828886  | 0.9494 | 184449677 | T | C | 0.06 | 1.37E-05 | 4.24E-02 | 6.30E-02 |
| rs11923588 | Brain_Cerebellar_Hemisphere          | 3 | HSP90AA5P    | 183834413 | rs4472033  | 1.0000 | 184459499 | A | G | 0.06 | 7.20E-06 | 2.43E-02 | 4.17E-02 |
| rs11923588 | Brain_Cerebellar_Hemisphere          | 3 | RP11-329B9.5 | 184460839 | rs4472033  | 1.0000 | 184459499 | A | G | 0.06 | 7.20E-06 | 1.48E-02 | 3.01E-02 |
| rs11923588 | Brain_Cerebellar_Hemisphere          | 3 | HSP90AA5P    | 183834413 | rs11923588 | 1.0000 | 184459667 | T | C | 0.06 | 5.66E-06 | 2.43E-02 | 4.14E-02 |
| rs11923588 | Brain_Cerebellar_Hemisphere          | 3 | RP11-329B9.5 | 184460839 | rs11923588 | 1.0000 | 184459667 | T | C | 0.06 | 5.66E-06 | 1.48E-02 | 2.98E-02 |
| rs11923588 | Brain_Cerebellum                     | 3 | MAP6D1       | 183538523 | rs9828886  | 0.9494 | 184449677 | T | C | 0.06 | 1.37E-05 | 2.38E-02 | 4.22E-02 |
| rs11923588 | Brain_Cerebellum                     | 3 | MIR1224      | 183959235 | rs9828886  | 0.9494 | 184449677 | T | C | 0.06 | 1.37E-05 | 4.37E-02 | 6.44E-02 |
| rs11923588 | Brain_Cerebellum                     | 3 | EHHADH       | 184954095 | rs9828886  | 0.9494 | 184449677 | T | C | 0.06 | 1.37E-05 | 2.96E-02 | 4.89E-02 |

|            |                                       |   |               |           |            |        |           |   |   |      |          |          |          |
|------------|---------------------------------------|---|---------------|-----------|------------|--------|-----------|---|---|------|----------|----------|----------|
| rs11923588 | Brain_Cerebellum                      | 3 | MAP6D1        | 183538523 | rs12635235 | 0.8823 | 184459005 | G | C | 0.05 | 9.09E-05 | 1.03E-02 | 3.54E-02 |
| rs11923588 | Brain_Cerebellum                      | 3 | EPHB3         | 184289884 | rs12635235 | 0.8823 | 184459005 | G | C | 0.05 | 9.09E-05 | 3.10E-02 | 6.28E-02 |
| rs11923588 | Brain_Cerebellum                      | 3 | EHHADH        | 184954095 | rs12635235 | 0.8823 | 184459005 | G | C | 0.05 | 9.09E-05 | 9.57E-03 | 3.41E-02 |
| rs11923588 | Brain_Cerebellum                      | 3 | RP11-537I16.2 | 185324512 | rs12635235 | 0.8823 | 184459005 | G | C | 0.05 | 9.09E-05 | 1.68E-02 | 4.49E-02 |
| rs11923588 | Brain_Cerebellum                      | 3 | CAMK2N2       | 183978312 | rs4472033  | 1.0000 | 184459499 | A | G | 0.06 | 7.20E-06 | 1.98E-02 | 3.64E-02 |
| rs11923588 | Brain_Cerebellum                      | 3 | CAMK2N2       | 183978312 | rs11923588 | 1.0000 | 184459667 | T | C | 0.06 | 5.66E-06 | 1.98E-02 | 3.61E-02 |
| rs11923588 | Brain_Cortex                          | 3 | YEATS2-AS1    | 183526253 | rs12635235 | 0.8823 | 184459005 | G | C | 0.05 | 9.09E-05 | 2.08E-02 | 5.03E-02 |
| rs11923588 | Brain_Frontal_Cortex_BA9              | 3 | YEATS2-AS1    | 183526253 | rs9828886  | 0.9494 | 184449677 | T | C | 0.06 | 1.37E-05 | 3.67E-02 | 5.69E-02 |
| rs11923588 | Brain_Hippocampus                     | 3 | YEATS2-AS1    | 183526253 | rs9828886  | 0.9494 | 184449677 | T | C | 0.06 | 1.37E-05 | 2.10E-02 | 3.88E-02 |
| rs11923588 | Brain_Hippocampus                     | 3 | ABCC5         | 183686762 | rs9828886  | 0.9494 | 184449677 | T | C | 0.06 | 1.37E-05 | 3.43E-02 | 5.42E-02 |
| rs11923588 | Brain_Hippocampus                     | 3 | TMEM41A       | 185205564 | rs9828886  | 0.9494 | 184449677 | T | C | 0.06 | 1.37E-05 | 2.91E-02 | 4.84E-02 |
| rs11923588 | Brain_Hippocampus                     | 3 | RP11-778D9.4  | 183867857 | rs12635235 | 0.8823 | 184459005 | G | C | 0.05 | 9.09E-05 | 2.90E-02 | 6.04E-02 |
| rs11923588 | Brain_Hippocampus                     | 3 | RP11-329B9.4  | 184454300 | rs4472033  | 1.0000 | 184459499 | A | G | 0.06 | 7.20E-06 | 3.38E-02 | 5.26E-02 |
| rs11923588 | Brain_Hippocampus                     | 3 | RP11-329B9.4  | 184454300 | rs11923588 | 1.0000 | 184459667 | T | C | 0.06 | 5.66E-06 | 3.38E-02 | 5.23E-02 |
| rs11923588 | Brain_Nucleus_accumbens_basal_ganglia | 3 | AP2M1         | 183897178 | rs9828886  | 0.9494 | 184449677 | T | C | 0.06 | 1.37E-05 | 2.88E-02 | 4.80E-02 |
| rs11923588 | Brain_Nucleus_accumbens_basal_ganglia | 3 | ABCF3         | 183907803 | rs9828886  | 0.9494 | 184449677 | T | C | 0.06 | 1.37E-05 | 2.50E-02 | 4.35E-02 |
| rs11923588 | Brain_Nucleus_accumbens_basal_ganglia | 3 | SENP2         | 185325811 | rs9828886  | 0.9494 | 184449677 | T | C | 0.06 | 1.37E-05 | 4.81E-02 | 6.90E-02 |
| rs11923588 | Brain_Nucleus_accumbens_basal_ganglia | 3 | ABCF3         | 183907803 | rs12635235 | 0.8823 | 184459005 | G | C | 0.05 | 9.09E-05 | 3.90E-02 | 7.18E-02 |
| rs11923588 | Brain_Nucleus_accumbens_basal_ganglia | 3 | AP2M1         | 183897178 | rs4472033  | 1.0000 | 184459499 | A | G | 0.06 | 7.20E-06 | 3.05E-02 | 4.89E-02 |
| rs11923588 | Brain_Nucleus_accumbens_basal_ganglia | 3 | AP2M1         | 183897178 | rs11923588 | 1.0000 | 184459667 | T | C | 0.06 | 5.66E-06 | 3.05E-02 | 4.86E-02 |
| rs11923588 | Brain_Putamen_basal_ganglia           | 3 | EPHB3         | 184289884 | rs9828886  | 0.9494 | 184449677 | T | C | 0.06 | 1.37E-05 | 2.89E-02 | 4.81E-02 |
| rs11923588 | Brain_Putamen_basal_ganglia           | 3 | RP11-433C9.2  | 184138380 | rs12635235 | 0.8823 | 184459005 | G | C | 0.05 | 9.09E-05 | 3.84E-02 | 7.12E-02 |
| rs11923588 | Brain_Putamen_basal_ganglia           | 3 | RP11-778D9.12 | 183852416 | rs4472033  | 1.0000 | 184459499 | A | G | 0.06 | 7.20E-06 | 4.80E-02 | 6.78E-02 |
| rs11923588 | Brain_Putamen_basal_ganglia           | 3 | EPHB3         | 184289884 | rs4472033  | 1.0000 | 184459499 | A | G | 0.06 | 7.20E-06 | 4.75E-02 | 6.73E-02 |
| rs11923588 | Brain_Putamen_basal_ganglia           | 3 | RP11-778D9.12 | 183852416 | rs11923588 | 1.0000 | 184459667 | T | C | 0.06 | 5.66E-06 | 4.80E-02 | 6.75E-02 |
| rs11923588 | Brain_Putamen_basal_ganglia           | 3 | EPHB3         | 184289884 | rs11923588 | 1.0000 | 184459667 | T | C | 0.06 | 5.66E-06 | 4.75E-02 | 6.70E-02 |
| rs11923588 | Brain_Spinal_cord_cervical_c-1        | 3 | ABCC5         | 183686762 | rs9828886  | 0.9494 | 184449677 | T | C | 0.06 | 1.37E-05 | 3.08E-02 | 5.03E-02 |
| rs11923588 | Brain_Spinal_cord_cervical_c-1        | 3 | CAMK2N2       | 183978312 | rs9828886  | 0.9494 | 184449677 | T | C | 0.06 | 1.37E-05 | 4.81E-02 | 6.90E-02 |
| rs11923588 | Brain_Spinal_cord_cervical_c-1        | 3 | YEATS2-AS1    | 183526253 | rs12635235 | 0.8823 | 184459005 | G | C | 0.05 | 9.09E-05 | 3.15E-02 | 6.34E-02 |
| rs11923588 | Brain_Spinal_cord_cervical_c-1        | 3 | ABCC5         | 183686762 | rs12635235 | 0.8823 | 184459005 | G | C | 0.05 | 9.09E-05 | 3.64E-02 | 6.90E-02 |
| rs11923588 | Brain_Spinal_cord_cervical_c-1        | 3 | CAMK2N2       | 183978312 | rs12635235 | 0.8823 | 184459005 | G | C | 0.05 | 9.09E-05 | 2.44E-02 | 5.48E-02 |
| rs11923588 | Brain_Spinal_cord_cervical_c-1        | 3 | CAMK2N2       | 183978312 | rs4472033  | 1.0000 | 184459499 | A | G | 0.06 | 7.20E-06 | 4.73E-02 | 6.71E-02 |
| rs11923588 | Brain_Spinal_cord_cervical_c-1        | 3 | CAMK2N2       | 183978312 | rs11923588 | 1.0000 | 184459667 | T | C | 0.06 | 5.66E-06 | 4.73E-02 | 6.68E-02 |
| rs11923588 | Brain_Substantia_nigra                | 3 | LIPH          | 185247225 | rs9828886  | 0.9494 | 184449677 | T | C | 0.06 | 1.37E-05 | 3.08E-02 | 5.03E-02 |
| rs11923588 | Brain_Substantia_nigra                | 3 | CAMK2N2       | 183978312 | rs4472033  | 1.0000 | 184459499 | A | G | 0.06 | 7.20E-06 | 4.15E-02 | 6.10E-02 |
| rs11923588 | Brain_Substantia_nigra                | 3 | LIPH          | 185247225 | rs4472033  | 1.0000 | 184459499 | A | G | 0.06 | 7.20E-06 | 3.57E-02 | 5.46E-02 |
| rs11923588 | Brain_Substantia_nigra                | 3 | CAMK2N2       | 183978312 | rs11923588 | 1.0000 | 184459667 | T | C | 0.06 | 5.66E-06 | 4.15E-02 | 6.07E-02 |
| rs11923588 | Brain_Substantia_nigra                | 3 | LIPH          | 185247225 | rs11923588 | 1.0000 | 184459667 | T | C | 0.06 | 5.66E-06 | 3.57E-02 | 5.43E-02 |
| rs11923588 | Whole_Blood                           | 3 | YEATS2-AS1    | 183526253 | rs9828886  | 0.9494 | 184449677 | T | C | 0.06 | 1.37E-05 | 3.05E-02 | 4.99E-02 |
| rs11923588 | Whole_Blood                           | 3 | CHRD          | 184102739 | rs9828886  | 0.9494 | 184449677 | T | C | 0.06 | 1.37E-05 | 1.15E-02 | 2.65E-02 |

|            |                                       |   |               |           |            |        |           |   |   |      |          |          |          |
|------------|---------------------------------------|---|---------------|-----------|------------|--------|-----------|---|---|------|----------|----------|----------|
| rs11923588 | Whole_Blood                           | 3 | PARL          | 183574934 | rs12635235 | 0.8823 | 184459005 | G | C | 0.05 | 9.09E-05 | 2.42E-02 | 5.47E-02 |
| rs11923588 | Whole_Blood                           | 3 | CHRD          | 184102739 | rs4472033  | 1.0000 | 184459499 | A | G | 0.06 | 7.20E-06 | 3.51E-02 | 5.40E-02 |
| rs11923588 | Whole_Blood                           | 3 | CHRD          | 184102739 | rs11923588 | 1.0000 | 184459667 | T | C | 0.06 | 5.66E-06 | 3.51E-02 | 5.37E-02 |
| rs66837203 | Brain_Amygdala                        | 4 | ARAP2         | 36097987  | s139213496 | 0.9382 | 36858139  | C | A | 0.06 | 7.97E-05 | 2.73E-02 | 5.94E-02 |
| rs66837203 | Brain_Amygdala                        | 4 | ARAP2         | 36097987  | rs16992769 | 0.9382 | 36865768  | A | G | 0.06 | 1.00E-04 | 3.10E-02 | 6.42E-02 |
| rs66837203 | Brain_Amygdala                        | 4 | ARAP2         | 36097987  | rs4832839  | 0.9382 | 36875527  | A | T | 0.06 | 1.00E-04 | 2.73E-02 | 5.99E-02 |
| rs66837203 | Brain_Amygdala                        | 4 | ARAP2         | 36097987  | rs72624105 | 0.9382 | 36890300  | C | G | 0.06 | 7.11E-05 | 2.73E-02 | 5.87E-02 |
| rs66837203 | Brain_Amygdala                        | 4 | ARAP2         | 36097987  | rs72624106 | 0.9382 | 36895800  | T | G | 0.06 | 9.17E-05 | 2.73E-02 | 5.94E-02 |
| rs66837203 | Brain_Cerebellum                      | 4 | DTHD1         | 36315311  | s139213496 | 0.9382 | 36858139  | C | A | 0.06 | 7.97E-05 | 1.42E-02 | 4.22E-02 |
| rs66837203 | Brain_Cerebellum                      | 4 | DTHD1         | 36315311  | rs16992769 | 0.9382 | 36865768  | A | G | 0.06 | 1.00E-04 | 1.14E-02 | 3.85E-02 |
| rs66837203 | Brain_Cerebellum                      | 4 | DTHD1         | 36315311  | rs4832839  | 0.9382 | 36875527  | A | T | 0.06 | 1.00E-04 | 2.12E-02 | 5.23E-02 |
| rs66837203 | Brain_Cerebellum                      | 4 | DTHD1         | 36315311  | rs72624105 | 0.9382 | 36890300  | C | G | 0.06 | 7.11E-05 | 3.03E-02 | 6.23E-02 |
| rs66837203 | Brain_Cerebellum                      | 4 | DTHD1         | 36315311  | rs72624106 | 0.9382 | 36895800  | T | G | 0.06 | 9.17E-05 | 1.35E-02 | 4.13E-02 |
| rs66837203 | Brain_Cerebellum                      | 4 | DTHD1         | 36315311  | rs66837203 | 1.0000 | 36897136  | T | C | 0.07 | 6.03E-06 | 1.20E-02 | 2.98E-02 |
| rs66837203 | Brain_Hypothalamus                    | 4 | ARAP2         | 36097987  | s139213496 | 0.9382 | 36858139  | C | A | 0.06 | 7.97E-05 | 3.09E-02 | 6.37E-02 |
| rs66837203 | Brain_Hypothalamus                    | 4 | ARAP2         | 36097987  | rs16992769 | 0.9382 | 36865768  | A | G | 0.06 | 1.00E-04 | 3.09E-02 | 6.42E-02 |
| rs66837203 | Brain_Hypothalamus                    | 4 | ARAP2         | 36097987  | rs4832839  | 0.9382 | 36875527  | A | T | 0.06 | 1.00E-04 | 3.09E-02 | 6.42E-02 |
| rs66837203 | Brain_Hypothalamus                    | 4 | ARAP2         | 36097987  | rs1978975  | 0.9588 | 36884958  | A | G | 0.07 | 2.36E-04 | 4.89E-02 | 9.28E-02 |
| rs66837203 | Brain_Hypothalamus                    | 4 | ARAP2         | 36097987  | rs1982578  | 0.9588 | 36885972  | T | G | 0.07 | 2.33E-04 | 4.89E-02 | 9.27E-02 |
| rs66837203 | Brain_Hypothalamus                    | 4 | ARAP2         | 36097987  | rs28872338 | 0.9004 | 36889599  | G | A | 0.07 | 1.82E-04 | 4.89E-02 | 9.08E-02 |
| rs66837203 | Brain_Hypothalamus                    | 4 | ARAP2         | 36097987  | rs72624105 | 0.9382 | 36890300  | C | G | 0.06 | 7.11E-05 | 3.09E-02 | 6.30E-02 |
| rs66837203 | Brain_Hypothalamus                    | 4 | ARAP2         | 36097987  | rs6817693  | 0.9588 | 36890895  | T | G | 0.07 | 2.09E-04 | 4.89E-02 | 9.18E-02 |
| rs66837203 | Brain_Hypothalamus                    | 4 | ARAP2         | 36097987  | rs72624106 | 0.9382 | 36895800  | T | G | 0.06 | 9.17E-05 | 3.09E-02 | 6.36E-02 |
| rs66837203 | Brain_Hypothalamus                    | 4 | ARAP2         | 36097987  | rs66837203 | 1.0000 | 36897136  | T | C | 0.07 | 6.03E-06 | 2.68E-03 | 1.36E-02 |
| rs66837203 | Brain_Nucleus_accumbens_basal_ganglia | 4 | RP11-177C12.1 | 37870756  | rs1978975  | 0.9588 | 36884958  | A | G | 0.07 | 2.36E-04 | 2.52E-02 | 6.60E-02 |
| rs66837203 | Brain_Nucleus_accumbens_basal_ganglia | 4 | RP11-177C12.1 | 37870756  | rs1982578  | 0.9588 | 36885972  | T | G | 0.07 | 2.33E-04 | 2.52E-02 | 6.59E-02 |
| rs66837203 | Brain_Nucleus_accumbens_basal_ganglia | 4 | RP11-177C12.1 | 37870756  | rs28872338 | 0.9004 | 36889599  | G | A | 0.07 | 1.82E-04 | 2.36E-02 | 6.19E-02 |
| rs66837203 | Brain_Nucleus_accumbens_basal_ganglia | 4 | RP11-177C12.1 | 37870756  | rs6817693  | 0.9588 | 36890895  | T | G | 0.07 | 2.09E-04 | 2.52E-02 | 6.50E-02 |
| rs66837203 | Brain_Putamen_basal_ganglia           | 4 | ARAP2         | 36097987  | s139213496 | 0.9382 | 36858139  | C | A | 0.06 | 7.97E-05 | 3.81E-02 | 7.19E-02 |
| rs66837203 | Brain_Putamen_basal_ganglia           | 4 | ARAP2         | 36097987  | rs16992769 | 0.9382 | 36865768  | A | G | 0.06 | 1.00E-04 | 3.81E-02 | 7.24E-02 |
| rs66837203 | Brain_Putamen_basal_ganglia           | 4 | ARAP2         | 36097987  | rs4832839  | 0.9382 | 36875527  | A | T | 0.06 | 1.00E-04 | 3.81E-02 | 7.24E-02 |
| rs66837203 | Brain_Putamen_basal_ganglia           | 4 | ARAP2         | 36097987  | rs72624105 | 0.9382 | 36890300  | C | G | 0.06 | 7.11E-05 | 3.81E-02 | 7.12E-02 |
| rs66837203 | Brain_Putamen_basal_ganglia           | 4 | ARAP2         | 36097987  | rs72624106 | 0.9382 | 36895800  | T | G | 0.06 | 9.17E-05 | 3.81E-02 | 7.19E-02 |
| rs66837203 | Brain_Putamen_basal_ganglia           | 4 | ARAP2         | 36097987  | rs66837203 | 1.0000 | 36897136  | T | C | 0.07 | 6.03E-06 | 4.88E-02 | 7.29E-02 |
| rs66837203 | Brain_Putamen_basal_ganglia           | 4 | RP11-431M7.3  | 36260790  | rs66837203 | 1.0000 | 36897136  | T | C | 0.07 | 6.03E-06 | 1.57E-02 | 3.49E-02 |
| rs66837203 | Brain_Substantia_nigra                | 4 | RP11-431M7.3  | 36260790  | s139213496 | 0.9382 | 36858139  | C | A | 0.06 | 7.97E-05 | 2.97E-02 | 6.23E-02 |
| rs66837203 | Brain_Substantia_nigra                | 4 | RP11-431M7.3  | 36260790  | rs16992769 | 0.9382 | 36865768  | A | G | 0.06 | 1.00E-04 | 3.20E-02 | 6.55E-02 |
| rs66837203 | Brain_Substantia_nigra                | 4 | RP11-431M7.3  | 36260790  | rs4832839  | 0.9382 | 36875527  | A | T | 0.06 | 1.00E-04 | 2.97E-02 | 6.28E-02 |
| rs66837203 | Brain_Substantia_nigra                | 4 | KIAA1239      | 37348464  | rs28872338 | 0.9004 | 36889599  | G | A | 0.07 | 1.82E-04 | 4.82E-02 | 9.01E-02 |
| rs66837203 | Brain_Substantia_nigra                | 4 | RP11-431M7.3  | 36260790  | rs72624105 | 0.9382 | 36890300  | C | G | 0.06 | 7.11E-05 | 2.97E-02 | 6.16E-02 |

|                                        |   |              |          |             |        |          |   |   |      |          |          |          |
|----------------------------------------|---|--------------|----------|-------------|--------|----------|---|---|------|----------|----------|----------|
| rs66837203 Brain_Substantia_nigra      | 4 | RP11-431M7.3 | 36260790 | rs72624106  | 0.9382 | 36895800 | T | G | 0.06 | 9.17E-05 | 2.97E-02 | 6.22E-02 |
| rs66837203 Brain_Substantia_nigra      | 4 | RP11-431M7.3 | 36260790 | rs66837203  | 1.0000 | 36897136 | T | C | 0.07 | 6.03E-06 | 2.53E-02 | 4.69E-02 |
| rs20002895 Brain_Amygdala              | 4 | DCK          | 71877443 | rs17148162  | 0.9213 | 70974741 | A | C | 0.10 | 4.65E-04 | 3.09E-02 | 7.64E-02 |
| rs20002895 Brain_Amygdala              | 4 | DCK          | 71877443 | rs4694043   | 0.9213 | 70975541 | C | G | 0.10 | 4.29E-04 | 3.09E-02 | 7.61E-02 |
| rs20002895 Brain_Amygdala              | 4 | DCK          | 71877443 | rs28645990  | 0.9213 | 70977161 | G | T | 0.10 | 4.29E-04 | 3.09E-02 | 7.61E-02 |
| rs20002895 Brain_Amygdala              | 4 | DCK          | 71877443 | rs55989074  | 0.9213 | 70982256 | A | T | 0.10 | 2.45E-04 | 3.09E-02 | 7.44E-02 |
| rs20002895 Brain_Amygdala              | 4 | DCK          | 71877443 | rs138807640 | 0.9213 | 70984155 | A | G | 0.10 | 2.36E-04 | 3.09E-02 | 7.41E-02 |
| rs20002895 Brain_Cerebellar_Hemisphere | 4 | RP11-46J23.1 | 71569836 | rs9994880   | 0.8324 | 70811070 | C | T | 0.10 | 1.95E-04 | 4.02E-02 | 8.29E-02 |
| rs20002895 Brain_Cerebellar_Hemisphere | 4 | RP11-46J23.1 | 71569836 | rs10013848  | 0.8324 | 70816927 | A | T | 0.10 | 1.50E-04 | 3.92E-02 | 8.09E-02 |
| rs20002895 Brain_Cerebellar_Hemisphere | 4 | RP11-46J23.1 | 71569836 | rs2734570   | 0.8324 | 70821713 | A | G | 0.10 | 1.77E-04 | 3.78E-02 | 8.07E-02 |
| rs20002895 Brain_Cerebellar_Hemisphere | 4 | RP11-46J23.1 | 71569836 | rs2673720   | 0.8324 | 70825933 | G | A | 0.10 | 1.68E-04 | 3.92E-02 | 8.22E-02 |
| rs20002895 Brain_Cerebellar_Hemisphere | 4 | RP11-46J23.1 | 71569836 | rs2247569   | 0.8324 | 70826437 | C | T | 0.10 | 1.68E-04 | 3.92E-02 | 8.22E-02 |
| rs20002895 Brain_Cerebellar_Hemisphere | 4 | RP11-46J23.1 | 71569836 | rs186123891 | 0.8324 | 70828593 | A | C | 0.10 | 1.88E-04 | 4.73E-02 | 9.06E-02 |
| rs20002895 Brain_Cerebellar_Hemisphere | 4 | RP11-46J23.1 | 71569836 | rs28377851  | 0.8423 | 70831724 | T | A | 0.10 | 3.63E-04 | 1.32E-02 | 5.73E-02 |
| rs20002895 Brain_Cerebellar_Hemisphere | 4 | RP11-46J23.1 | 71569836 | rs35772950  | 0.8423 | 70832941 | A | G | 0.10 | 3.63E-04 | 1.32E-02 | 5.73E-02 |
| rs20002895 Brain_Cerebellar_Hemisphere | 4 | RP11-46J23.1 | 71569836 | rs28720737  | 0.8423 | 70833223 | G | A | 0.10 | 3.63E-04 | 1.76E-02 | 6.39E-02 |
| rs20002895 Brain_Cerebellar_Hemisphere | 4 | RP11-46J23.1 | 71569836 | rs10031238  | 0.8423 | 70833357 | G | T | 0.10 | 3.63E-04 | 1.74E-02 | 6.37E-02 |
| rs20002895 Brain_Cerebellar_Hemisphere | 4 | RP11-46J23.1 | 71569836 | rs9994584   | 0.8423 | 70833723 | T | G | 0.10 | 3.63E-04 | 1.32E-02 | 5.73E-02 |
| rs20002895 Brain_Cerebellar_Hemisphere | 4 | RP11-46J23.1 | 71569836 | rs10031845  | 0.8423 | 70834238 | C | A | 0.10 | 1.44E-04 | 3.92E-02 | 8.09E-02 |
| rs20002895 Brain_Cerebellar_Hemisphere | 4 | RP11-46J23.1 | 71569836 | rs17146478  | 0.8423 | 70834683 | G | T | 0.10 | 3.72E-04 | 1.46E-02 | 5.98E-02 |
| rs20002895 Brain_Cerebellar_Hemisphere | 4 | RP11-46J23.1 | 71569836 | rs79406241  | 0.8423 | 70834693 | G | A | 0.10 | 1.44E-04 | 4.35E-02 | 8.56E-02 |
| rs20002895 Brain_Cerebellar_Hemisphere | 4 | RP11-46J23.1 | 71569836 | rs17146480  | 0.8423 | 70834740 | G | A | 0.10 | 3.60E-04 | 1.46E-02 | 5.97E-02 |
| rs20002895 Brain_Cerebellar_Hemisphere | 4 | RP11-46J23.1 | 71569836 | rs59453376  | 0.8423 | 70834877 | T | C | 0.10 | 3.72E-04 | 1.32E-02 | 5.76E-02 |
| rs20002895 Brain_Cerebellar_Hemisphere | 4 | RP11-46J23.1 | 71569836 | rs10000684  | 0.8423 | 70835403 | T | G | 0.10 | 3.72E-04 | 1.32E-02 | 5.76E-02 |
| rs20002895 Brain_Cerebellar_Hemisphere | 4 | RP11-46J23.1 | 71569836 | rs10000776  | 0.8423 | 70835520 | C | G | 0.10 | 1.44E-04 | 3.92E-02 | 8.09E-02 |
| rs20002895 Brain_Cerebellar_Hemisphere | 4 | RP11-46J23.1 | 71569836 | rs28711127  | 0.8423 | 70836136 | T | G | 0.10 | 5.41E-04 | 3.92E-02 | 8.67E-02 |
| rs20002895 Brain_Cerebellar_Hemisphere | 4 | RP11-46J23.1 | 71569836 | rs28508161  | 0.8423 | 70836565 | C | T | 0.10 | 5.41E-04 | 3.92E-02 | 8.67E-02 |
| rs20002895 Brain_Cerebellar_Hemisphere | 4 | RP11-46J23.1 | 71569836 | rs28798425  | 0.8423 | 70838306 | G | A | 0.10 | 3.25E-04 | 3.92E-02 | 8.47E-02 |
| rs20002895 Brain_Cerebellar_Hemisphere | 4 | RP11-46J23.1 | 71569836 | rs4694261   | 0.8423 | 70839766 | T | C | 0.10 | 3.27E-04 | 3.92E-02 | 8.48E-02 |
| rs20002895 Brain_Cerebellar_Hemisphere | 4 | RP11-46J23.1 | 71569836 | rs4694262   | 0.8423 | 70839850 | A | G | 0.10 | 3.27E-04 | 3.92E-02 | 8.48E-02 |
| rs20002895 Brain_Cerebellar_Hemisphere | 4 | RP11-46J23.1 | 71569836 | rs7356202   | 0.8423 | 70840436 | T | C | 0.10 | 3.27E-04 | 4.70E-02 | 9.32E-02 |
| rs20002895 Brain_Cerebellar_Hemisphere | 4 | RP11-46J23.1 | 71569836 | rs77141872  | 0.8423 | 70841126 | T | C | 0.10 | 3.27E-04 | 3.92E-02 | 8.48E-02 |
| rs20002895 Brain_Cerebellar_Hemisphere | 4 | RP11-46J23.1 | 71569836 | rs12648752  | 0.8423 | 70841254 | C | T | 0.10 | 3.27E-04 | 3.92E-02 | 8.48E-02 |
| rs20002895 Brain_Cerebellar_Hemisphere | 4 | RP11-46J23.1 | 71569836 | rs28786470  | 0.8423 | 70842730 | T | C | 0.10 | 3.25E-04 | 3.92E-02 | 8.47E-02 |
| rs20002895 Brain_Cerebellar_Hemisphere | 4 | RP11-46J23.1 | 71569836 | rs17147891  | 0.8423 | 70849978 | T | A | 0.10 | 3.72E-04 | 3.92E-02 | 8.52E-02 |
| rs20002895 Brain_Cerebellar_Hemisphere | 4 | RP11-46J23.1 | 71569836 | rs28661681  | 0.8843 | 70854978 | T | C | 0.10 | 3.80E-04 | 3.92E-02 | 8.41E-02 |
| rs20002895 Brain_Cerebellar_Hemisphere | 4 | RP11-46J23.1 | 71569836 | rs4694263   | 0.8843 | 70862927 | C | T | 0.10 | 2.79E-04 | 3.92E-02 | 8.38E-02 |
| rs20002895 Brain_Cerebellar_Hemisphere | 4 | RP11-46J23.1 | 71569836 | rs3775764   | 0.8843 | 70864065 | A | G | 0.10 | 2.79E-04 | 3.92E-02 | 8.38E-02 |
| rs20002895 Brain_Cerebellar_Hemisphere | 4 | RP11-46J23.1 | 71569836 | rs1231535   | 0.8743 | 70875649 | T | C | 0.13 | 8.58E-05 | 1.43E-02 | 4.54E-02 |
| rs20002895 Brain_Cerebellar_Hemisphere | 4 | RP11-46J23.1 | 71569836 | rs776837    | 0.8743 | 70876153 | C | T | 0.13 | 6.46E-05 | 1.56E-02 | 4.55E-02 |

|            |                             |   |              |          |            |        |          |   |   |      |          |          |          |
|------------|-----------------------------|---|--------------|----------|------------|--------|----------|---|---|------|----------|----------|----------|
| rs20002895 | Brain_Cerebellar_Hemisphere | 4 | RP11-46J23.1 | 71569836 | rs1606878  | 0.8843 | 70876844 | A | T | 0.10 | 2.79E-04 | 3.92E-02 | 8.38E-02 |
| rs20002895 | Brain_Cerebellar_Hemisphere | 4 | RP11-46J23.1 | 71569836 | rs28799286 | 0.8843 | 70878782 | T | C | 0.10 | 2.79E-04 | 4.43E-02 | 8.94E-02 |
| rs20002895 | Brain_Cerebellar_Hemisphere | 4 | RP11-46J23.1 | 71569836 | rs79704056 | 0.8843 | 70885815 | G | A | 0.10 | 2.93E-04 | 2.37E-02 | 6.61E-02 |
| rs20002895 | Brain_Cerebellar_Hemisphere | 4 | RP11-46J23.1 | 71569836 | rs1849937  | 0.8843 | 70898907 | T | C | 0.10 | 2.93E-04 | 2.59E-02 | 6.88E-02 |
| rs20002895 | Brain_Cerebellar_Hemisphere | 4 | RP11-46J23.1 | 71569836 | rs28707754 | 0.8843 | 70900864 | T | C | 0.10 | 2.67E-04 | 3.92E-02 | 8.34E-02 |
| rs20002895 | Brain_Cerebellar_Hemisphere | 4 | RP11-46J23.1 | 71569836 | rs4694040  | 0.8843 | 70901653 | A | G | 0.10 | 2.67E-04 | 3.85E-02 | 8.26E-02 |
| rs20002895 | Brain_Cerebellar_Hemisphere | 4 | RP11-46J23.1 | 71569836 | rs7654757  | 0.8843 | 70902412 | T | C | 0.10 | 2.67E-04 | 3.92E-02 | 8.34E-02 |
| rs20002895 | Brain_Cerebellar_Hemisphere | 4 | RP11-46J23.1 | 71569836 | rs13434441 | 0.9206 | 70905397 | C | T | 0.10 | 1.93E-04 | 2.37E-02 | 6.31E-02 |
| rs20002895 | Brain_Cerebellar_Hemisphere | 4 | RP11-46J23.1 | 71569836 | rs28643541 | 0.9407 | 70912133 | A | G | 0.11 | 7.92E-05 | 4.21E-02 | 7.78E-02 |
| rs20002895 | Brain_Cerebellar_Hemisphere | 4 | RP11-46J23.1 | 71569836 | rs6857697  | 0.9407 | 70914609 | A | C | 0.11 | 6.25E-05 | 4.21E-02 | 7.64E-02 |
| rs20002895 | Brain_Cerebellar_Hemisphere | 4 | RP11-46J23.1 | 71569836 | rs3862054  | 0.9407 | 70916273 | T | C | 0.10 | 1.52E-04 | 2.90E-02 | 6.85E-02 |
| rs20002895 | Brain_Cerebellar_Hemisphere | 4 | RP11-46J23.1 | 71569836 | rs6818370  | 0.9307 | 70921069 | T | G | 0.10 | 2.23E-05 | 4.35E-02 | 7.50E-02 |
| rs20002895 | Brain_Cerebellar_Hemisphere | 4 | RP11-46J23.1 | 71569836 | rs10019826 | 0.9407 | 70922064 | A | G | 0.11 | 4.30E-05 | 4.21E-02 | 7.64E-02 |
| rs20002895 | Brain_Cerebellar_Hemisphere | 4 | RP11-46J23.1 | 71569836 | rs28869909 | 0.9407 | 70922226 | C | A | 0.10 | 1.09E-04 | 2.90E-02 | 6.72E-02 |
| rs20002895 | Brain_Cerebellar_Hemisphere | 4 | RP11-46J23.1 | 71569836 | s115749891 | 1.0000 | 70923658 | A | G | 0.10 | 8.26E-05 | 2.90E-02 | 6.96E-02 |
| rs20002895 | Brain_Cerebellar_Hemisphere | 4 | RP11-46J23.1 | 71569836 | s200028958 | 1.0000 | 70923661 | A | G | 0.10 | 6.25E-06 | 2.90E-02 | 5.35E-02 |
| rs20002895 | Brain_Cerebellar_Hemisphere | 4 | RP11-46J23.1 | 71569836 | s201171800 | 1.0000 | 70923663 | A | G | 0.10 | 6.25E-06 | 2.90E-02 | 5.35E-02 |
| rs20002895 | Brain_Cerebellar_Hemisphere | 4 | RP11-46J23.1 | 71569836 | s202245754 | 1.0000 | 70923665 | C | A | 0.10 | 6.25E-06 | 2.90E-02 | 5.35E-02 |
| rs20002895 | Brain_Cerebellar_Hemisphere | 4 | RP11-46J23.1 | 71569836 | s200349247 | 1.0000 | 70923666 | A | T | 0.10 | 6.25E-06 | 2.90E-02 | 5.35E-02 |
| rs20002895 | Brain_Cerebellar_Hemisphere | 4 | RP11-46J23.1 | 71569836 | rs28790602 | 0.9407 | 70928040 | A | G | 0.10 | 1.10E-04 | 2.90E-02 | 6.73E-02 |
| rs20002895 | Brain_Cerebellar_Hemisphere | 4 | RP11-46J23.1 | 71569836 | rs4694265  | 0.9407 | 70928571 | A | G | 0.10 | 1.10E-04 | 2.90E-02 | 6.73E-02 |
| rs20002895 | Brain_Cerebellar_Hemisphere | 4 | RP11-46J23.1 | 71569836 | rs28635879 | 0.9407 | 70929763 | T | C | 0.10 | 1.22E-04 | 1.78E-02 | 5.39E-02 |
| rs20002895 | Brain_Cerebellar_Hemisphere | 4 | RP11-46J23.1 | 71569836 | rs28622022 | 0.9407 | 70929889 | T | A | 0.10 | 1.12E-04 | 2.90E-02 | 6.74E-02 |
| rs20002895 | Brain_Cerebellar_Hemisphere | 4 | RP11-46J23.1 | 71569836 | rs6832546  | 0.9407 | 70930584 | T | G | 0.10 | 1.22E-04 | 1.78E-02 | 5.39E-02 |
| rs20002895 | Brain_Cerebellar_Hemisphere | 4 | RP11-46J23.1 | 71569836 | rs17148034 | 0.9122 | 70937524 | G | C | 0.10 | 2.93E-04 | 2.90E-02 | 7.05E-02 |
| rs20002895 | Brain_Cerebellar_Hemisphere | 4 | RP11-46J23.1 | 71569836 | rs7660022  | 0.9314 | 70943619 | A | C | 0.10 | 2.25E-04 | 1.78E-02 | 5.61E-02 |
| rs20002895 | Brain_Cerebellar_Hemisphere | 4 | RP11-46J23.1 | 71569836 | rs10004471 | 0.9314 | 70950312 | C | A | 0.10 | 2.25E-04 | 2.82E-02 | 6.95E-02 |
| rs20002895 | Brain_Cerebellar_Hemisphere | 4 | RP11-46J23.1 | 71569836 | rs28489946 | 0.9314 | 70952099 | C | T | 0.10 | 2.25E-04 | 1.78E-02 | 5.61E-02 |
| rs20002895 | Brain_Cerebellar_Hemisphere | 4 | RP11-46J23.1 | 71569836 | rs7666225  | 0.9314 | 70959484 | C | T | 0.10 | 2.24E-04 | 1.23E-02 | 4.79E-02 |
| rs20002895 | Brain_Cerebellar_Hemisphere | 4 | RP11-46J23.1 | 71569836 | rs4694041  | 0.9314 | 70961196 | G | C | 0.10 | 2.24E-04 | 1.78E-02 | 5.60E-02 |
| rs20002895 | Brain_Cerebellar_Hemisphere | 4 | RP11-46J23.1 | 71569836 | rs28434698 | 0.9314 | 70965054 | C | T | 0.10 | 2.10E-04 | 1.78E-02 | 5.57E-02 |
| rs20002895 | Brain_Cerebellar_Hemisphere | 4 | RP11-46J23.1 | 71569836 | rs12331580 | 0.9314 | 70973499 | A | C | 0.10 | 2.87E-04 | 2.33E-02 | 6.41E-02 |
| rs20002895 | Brain_Cerebellar_Hemisphere | 4 | RP11-46J23.1 | 71569836 | rs17148162 | 0.9213 | 70974741 | A | C | 0.10 | 4.65E-04 | 4.75E-02 | 9.48E-02 |
| rs20002895 | Brain_Cerebellar_Hemisphere | 4 | RP11-46J23.1 | 71569836 | rs4694043  | 0.9213 | 70975541 | C | G | 0.10 | 4.29E-04 | 3.73E-02 | 8.34E-02 |
| rs20002895 | Brain_Cerebellar_Hemisphere | 4 | RP11-46J23.1 | 71569836 | rs28645990 | 0.9213 | 70977161 | G | T | 0.10 | 4.29E-04 | 3.25E-02 | 7.79E-02 |
| rs20002895 | Brain_Cerebellar_Hemisphere | 4 | RP11-46J23.1 | 71569836 | rs17148181 | 0.9213 | 70981462 | T | C | 0.10 | 3.67E-04 | 2.86E-02 | 7.17E-02 |
| rs20002895 | Brain_Cerebellar_Hemisphere | 4 | RP11-46J23.1 | 71569836 | rs55989074 | 0.9213 | 70982256 | A | T | 0.10 | 2.45E-04 | 3.25E-02 | 7.62E-02 |
| rs20002895 | Brain_Cerebellar_Hemisphere | 4 | RP11-46J23.1 | 71569836 | s138807640 | 0.9213 | 70984155 | A | G | 0.10 | 2.36E-04 | 3.25E-02 | 7.59E-02 |
| rs20002895 | Brain_Cerebellar_Hemisphere | 4 | RP11-46J23.1 | 71569836 | s116572259 | 0.9213 | 70984463 | C | T | 0.10 | 1.99E-04 | 2.86E-02 | 6.97E-02 |
| rs20002895 | Brain_Cerebellar_Hemisphere | 4 | RP11-46J23.1 | 71569836 | rs10011994 | 0.9021 | 70987026 | A | T | 0.10 | 1.78E-04 | 2.86E-02 | 6.91E-02 |

|            |                             |   |              |          |             |        |          |   |   |      |          |          |          |
|------------|-----------------------------|---|--------------|----------|-------------|--------|----------|---|---|------|----------|----------|----------|
| rs20002895 | Brain_Cerebellar_Hemisphere | 4 | RP11-46J23.1 | 71569836 | rs28866208  | 0.9021 | 70987317 | G | A | 0.10 | 1.78E-04 | 2.85E-02 | 6.91E-02 |
| rs20002895 | Brain_Cerebellar_Hemisphere | 4 | RP11-46J23.1 | 71569836 | rs7356162   | 0.9021 | 70987982 | G | T | 0.11 | 4.61E-04 | 4.65E-02 | 9.48E-02 |
| rs20002895 | Brain_Cerebellar_Hemisphere | 4 | RP11-46J23.1 | 71569836 | rs1607989   | 0.9021 | 70990224 | G | A | 0.11 | 3.41E-04 | 4.30E-02 | 8.96E-02 |
| rs20002895 | Brain_Cerebellar_Hemisphere | 4 | RP11-46J23.1 | 71569836 | rs10007698  | 0.9021 | 70990879 | C | T | 0.10 | 1.26E-04 | 1.02E-02 | 4.24E-02 |
| rs20002895 | Brain_Cerebellum            | 4 | UTP3         | 71555231 | rs776837    | 0.8743 | 70876153 | C | T | 0.13 | 6.46E-05 | 4.08E-02 | 7.62E-02 |
| rs20002895 | Brain_Cortex                | 4 | RUFY3        | 71621775 | rs1231535   | 0.8743 | 70875649 | T | C | 0.13 | 8.58E-05 | 2.74E-02 | 6.26E-02 |
| rs20002895 | Brain_Cortex                | 4 | RUFY3        | 71621775 | rs776837    | 0.8743 | 70876153 | C | T | 0.13 | 6.46E-05 | 4.33E-02 | 7.90E-02 |
| rs20002895 | Brain_Cortex                | 4 | RUFY3        | 71621775 | rs12331580  | 0.9314 | 70973499 | A | C | 0.10 | 2.87E-04 | 4.70E-02 | 9.13E-02 |
| rs20002895 | Brain_Cortex                | 4 | RUFY3        | 71621775 | rs17148184  | 0.9213 | 70981602 | T | A | 0.10 | 4.29E-04 | 4.32E-02 | 8.99E-02 |
| rs20002895 | Brain_Frontal_Cortex_BA9    | 4 | RP11-46J23.1 | 71569836 | rs10031238  | 0.8423 | 70833357 | G | T | 0.10 | 3.63E-04 | 4.06E-02 | 9.20E-02 |
| rs20002895 | Brain_Hippocampus           | 4 | MOB1B        | 71810964 | rs7660022   | 0.9314 | 70943619 | A | C | 0.10 | 2.25E-04 | 4.04E-02 | 8.35E-02 |
| rs20002895 | Brain_Hippocampus           | 4 | MOB1B        | 71810964 | rs28489946  | 0.9314 | 70952099 | C | T | 0.10 | 2.25E-04 | 4.04E-02 | 8.35E-02 |
| rs20002895 | Brain_Hippocampus           | 4 | MOB1B        | 71810964 | rs7666225   | 0.9314 | 70959484 | C | T | 0.10 | 2.24E-04 | 2.66E-02 | 6.75E-02 |
| rs20002895 | Brain_Hippocampus           | 4 | MOB1B        | 71810964 | rs4694041   | 0.9314 | 70961196 | G | C | 0.10 | 2.24E-04 | 4.04E-02 | 8.35E-02 |
| rs20002895 | Brain_Hippocampus           | 4 | MOB1B        | 71810964 | rs28434698  | 0.9314 | 70965054 | C | T | 0.10 | 2.10E-04 | 4.04E-02 | 8.31E-02 |
| rs20002895 | Brain_Hippocampus           | 4 | MOB1B        | 71810964 | rs12331580  | 0.9314 | 70973499 | A | C | 0.10 | 2.87E-04 | 4.99E-02 | 9.44E-02 |
| rs20002895 | Brain_Hippocampus           | 4 | RP11-46J23.1 | 71569836 | rs17148184  | 0.9213 | 70981602 | T | A | 0.10 | 4.29E-04 | 3.72E-02 | 8.33E-02 |
| rs20002895 | Brain_Hypothalamus          | 4 | UTP3         | 71555231 | rs2029572   | 0.8324 | 70810063 | A | G | 0.10 | 1.75E-04 | 3.57E-02 | 7.76E-02 |
| rs20002895 | Brain_Hypothalamus          | 4 | UTP3         | 71555231 | rs9994880   | 0.8324 | 70811070 | C | T | 0.10 | 1.95E-04 | 1.85E-02 | 5.66E-02 |
| rs20002895 | Brain_Hypothalamus          | 4 | UTP3         | 71555231 | rs9992853   | 0.8324 | 70811521 | G | A | 0.10 | 1.95E-04 | 1.60E-02 | 5.30E-02 |
| rs20002895 | Brain_Hypothalamus          | 4 | UTP3         | 71555231 | rs10013848  | 0.8324 | 70816927 | A | T | 0.10 | 1.50E-04 | 1.85E-02 | 5.57E-02 |
| rs20002895 | Brain_Hypothalamus          | 4 | UTP3         | 71555231 | rs2734570   | 0.8324 | 70821713 | A | G | 0.10 | 1.77E-04 | 1.79E-02 | 5.62E-02 |
| rs20002895 | Brain_Hypothalamus          | 4 | UTP3         | 71555231 | rs2673720   | 0.8324 | 70825933 | G | A | 0.10 | 1.68E-04 | 1.78E-02 | 5.60E-02 |
| rs20002895 | Brain_Hypothalamus          | 4 | UTP3         | 71555231 | rs2247569   | 0.8324 | 70826437 | C | T | 0.10 | 1.68E-04 | 1.85E-02 | 5.70E-02 |
| rs20002895 | Brain_Hypothalamus          | 4 | UTP3         | 71555231 | rs186123891 | 0.8324 | 70828593 | A | C | 0.10 | 1.88E-04 | 1.88E-02 | 5.70E-02 |
| rs20002895 | Brain_Hypothalamus          | 4 | UTP3         | 71555231 | rs28377851  | 0.8423 | 70831724 | T | A | 0.10 | 3.63E-04 | 2.68E-02 | 7.60E-02 |
| rs20002895 | Brain_Hypothalamus          | 4 | UTP3         | 71555231 | rs35772950  | 0.8423 | 70832941 | A | G | 0.10 | 3.63E-04 | 2.68E-02 | 7.60E-02 |
| rs20002895 | Brain_Hypothalamus          | 4 | UTP3         | 71555231 | rs28720737  | 0.8423 | 70833223 | G | A | 0.10 | 3.63E-04 | 2.68E-02 | 7.60E-02 |
| rs20002895 | Brain_Hypothalamus          | 4 | UTP3         | 71555231 | rs10031238  | 0.8423 | 70833357 | G | T | 0.10 | 3.63E-04 | 1.94E-02 | 6.65E-02 |
| rs20002895 | Brain_Hypothalamus          | 4 | UTP3         | 71555231 | rs9994584   | 0.8423 | 70833723 | T | G | 0.10 | 3.63E-04 | 2.68E-02 | 7.60E-02 |
| rs20002895 | Brain_Hypothalamus          | 4 | UTP3         | 71555231 | rs10031845  | 0.8423 | 70834238 | C | A | 0.10 | 1.44E-04 | 1.68E-02 | 5.33E-02 |
| rs20002895 | Brain_Hypothalamus          | 4 | RUFY3        | 71621775 | rs10031845  | 0.8423 | 70834238 | C | A | 0.10 | 1.44E-04 | 4.77E-02 | 9.01E-02 |
| rs20002895 | Brain_Hypothalamus          | 4 | UTP3         | 71555231 | rs17146478  | 0.8423 | 70834683 | G | T | 0.10 | 3.72E-04 | 4.80E-02 | 1.00E-01 |
| rs20002895 | Brain_Hypothalamus          | 4 | UTP3         | 71555231 | rs79406241  | 0.8423 | 70834693 | G | A | 0.10 | 1.44E-04 | 3.29E-02 | 7.37E-02 |
| rs20002895 | Brain_Hypothalamus          | 4 | UTP3         | 71555231 | rs17146480  | 0.8423 | 70834740 | G | A | 0.10 | 3.60E-04 | 4.80E-02 | 1.00E-01 |
| rs20002895 | Brain_Hypothalamus          | 4 | UTP3         | 71555231 | rs59453376  | 0.8423 | 70834877 | T | C | 0.10 | 3.72E-04 | 2.68E-02 | 7.64E-02 |
| rs20002895 | Brain_Hypothalamus          | 4 | UTP3         | 71555231 | rs10000684  | 0.8423 | 70835403 | T | G | 0.10 | 3.72E-04 | 2.68E-02 | 7.64E-02 |
| rs20002895 | Brain_Hypothalamus          | 4 | UTP3         | 71555231 | rs10000776  | 0.8423 | 70835520 | C | G | 0.10 | 1.44E-04 | 1.68E-02 | 5.33E-02 |
| rs20002895 | Brain_Hypothalamus          | 4 | RUFY3        | 71621775 | rs10000776  | 0.8423 | 70835520 | C | G | 0.10 | 1.44E-04 | 4.77E-02 | 9.01E-02 |
| rs20002895 | Brain_Hypothalamus          | 4 | UTP3         | 71555231 | rs28711127  | 0.8423 | 70836136 | T | G | 0.10 | 5.41E-04 | 1.68E-02 | 5.89E-02 |



|            |                    |   |       |          |            |        |          |   |   |      |          |          |          |
|------------|--------------------|---|-------|----------|------------|--------|----------|---|---|------|----------|----------|----------|
| rs20002895 | Brain_Hypothalamus | 4 | RUFY3 | 71621775 | rs28711127 | 0.8423 | 70836136 | T | G | 0.10 | 5.41E-04 | 4.77E-02 | 9.58E-02 |
| rs20002895 | Brain_Hypothalamus | 4 | UTP3  | 71555231 | rs28508161 | 0.8423 | 70836565 | C | T | 0.10 | 5.41E-04 | 1.68E-02 | 5.89E-02 |
| rs20002895 | Brain_Hypothalamus | 4 | RUFY3 | 71621775 | rs28508161 | 0.8423 | 70836565 | C | T | 0.10 | 5.41E-04 | 4.77E-02 | 9.58E-02 |
| rs20002895 | Brain_Hypothalamus | 4 | UTP3  | 71555231 | rs28798425 | 0.8423 | 70838306 | G | A | 0.10 | 3.25E-04 | 1.68E-02 | 5.70E-02 |
| rs20002895 | Brain_Hypothalamus | 4 | RUFY3 | 71621775 | rs28798425 | 0.8423 | 70838306 | G | A | 0.10 | 3.25E-04 | 4.77E-02 | 9.39E-02 |
| rs20002895 | Brain_Hypothalamus | 4 | UTP3  | 71555231 | rs4694261  | 0.8423 | 70839766 | T | C | 0.10 | 3.27E-04 | 1.68E-02 | 5.70E-02 |
| rs20002895 | Brain_Hypothalamus | 4 | RUFY3 | 71621775 | rs4694261  | 0.8423 | 70839766 | T | C | 0.10 | 3.27E-04 | 4.77E-02 | 9.40E-02 |
| rs20002895 | Brain_Hypothalamus | 4 | UTP3  | 71555231 | rs4694262  | 0.8423 | 70839850 | A | G | 0.10 | 3.27E-04 | 1.68E-02 | 5.70E-02 |
| rs20002895 | Brain_Hypothalamus | 4 | RUFY3 | 71621775 | rs4694262  | 0.8423 | 70839850 | A | G | 0.10 | 3.27E-04 | 4.77E-02 | 9.40E-02 |
| rs20002895 | Brain_Hypothalamus | 4 | UTP3  | 71555231 | rs7356202  | 0.8423 | 70840436 | T | C | 0.10 | 3.27E-04 | 1.43E-02 | 5.34E-02 |
| rs20002895 | Brain_Hypothalamus | 4 | RUFY3 | 71621775 | rs7356202  | 0.8423 | 70840436 | T | C | 0.10 | 3.27E-04 | 4.39E-02 | 8.99E-02 |
| rs20002895 | Brain_Hypothalamus | 4 | UTP3  | 71555231 | rs77141872 | 0.8423 | 70841126 | T | C | 0.10 | 3.27E-04 | 1.68E-02 | 5.70E-02 |
| rs20002895 | Brain_Hypothalamus | 4 | RUFY3 | 71621775 | rs77141872 | 0.8423 | 70841126 | T | C | 0.10 | 3.27E-04 | 4.77E-02 | 9.40E-02 |
| rs20002895 | Brain_Hypothalamus | 4 | UTP3  | 71555231 | rs12648752 | 0.8423 | 70841254 | C | T | 0.10 | 3.27E-04 | 1.68E-02 | 5.70E-02 |
| rs20002895 | Brain_Hypothalamus | 4 | RUFY3 | 71621775 | rs12648752 | 0.8423 | 70841254 | C | T | 0.10 | 3.27E-04 | 4.77E-02 | 9.40E-02 |
| rs20002895 | Brain_Hypothalamus | 4 | UTP3  | 71555231 | rs28786470 | 0.8423 | 70842730 | T | C | 0.10 | 3.25E-04 | 1.68E-02 | 5.70E-02 |
| rs20002895 | Brain_Hypothalamus | 4 | RUFY3 | 71621775 | rs28786470 | 0.8423 | 70842730 | T | C | 0.10 | 3.25E-04 | 4.77E-02 | 9.39E-02 |
| rs20002895 | Brain_Hypothalamus | 4 | UTP3  | 71555231 | rs17147891 | 0.8423 | 70849978 | T | A | 0.10 | 3.72E-04 | 1.68E-02 | 5.75E-02 |
| rs20002895 | Brain_Hypothalamus | 4 | RUFY3 | 71621775 | rs17147891 | 0.8423 | 70849978 | T | A | 0.10 | 3.72E-04 | 4.77E-02 | 9.44E-02 |
| rs20002895 | Brain_Hypothalamus | 4 | UTP3  | 71555231 | rs28661681 | 0.8843 | 70854978 | T | C | 0.10 | 3.80E-04 | 1.68E-02 | 5.64E-02 |
| rs20002895 | Brain_Hypothalamus | 4 | RUFY3 | 71621775 | rs28661681 | 0.8843 | 70854978 | T | C | 0.10 | 3.80E-04 | 4.77E-02 | 9.33E-02 |
| rs20002895 | Brain_Hypothalamus | 4 | UTP3  | 71555231 | rs4694263  | 0.8843 | 70862927 | C | T | 0.10 | 2.79E-04 | 1.68E-02 | 5.61E-02 |
| rs20002895 | Brain_Hypothalamus | 4 | RUFY3 | 71621775 | rs4694263  | 0.8843 | 70862927 | C | T | 0.10 | 2.79E-04 | 4.77E-02 | 9.30E-02 |
| rs20002895 | Brain_Hypothalamus | 4 | DCK   | 71877443 | rs4694263  | 0.8843 | 70862927 | C | T | 0.10 | 2.79E-04 | 7.65E-03 | 4.12E-02 |
| rs20002895 | Brain_Hypothalamus | 4 | UTP3  | 71555231 | rs3775764  | 0.8843 | 70864065 | A | G | 0.10 | 2.79E-04 | 1.68E-02 | 5.61E-02 |
| rs20002895 | Brain_Hypothalamus | 4 | RUFY3 | 71621775 | rs3775764  | 0.8843 | 70864065 | A | G | 0.10 | 2.79E-04 | 4.77E-02 | 9.30E-02 |
| rs20002895 | Brain_Hypothalamus | 4 | DCK   | 71877443 | rs3775764  | 0.8843 | 70864065 | A | G | 0.10 | 2.79E-04 | 7.65E-03 | 4.12E-02 |
| rs20002895 | Brain_Hypothalamus | 4 | UTP3  | 71555231 | rs1231535  | 0.8743 | 70875649 | T | C | 0.13 | 8.58E-05 | 4.81E-02 | 8.59E-02 |
| rs20002895 | Brain_Hypothalamus | 4 | UTP3  | 71555231 | rs776837   | 0.8743 | 70876153 | C | T | 0.13 | 6.46E-05 | 3.11E-02 | 6.53E-02 |
| rs20002895 | Brain_Hypothalamus | 4 | DCK   | 71877443 | rs776837   | 0.8743 | 70876153 | C | T | 0.13 | 6.46E-05 | 1.77E-02 | 4.84E-02 |
| rs20002895 | Brain_Hypothalamus | 4 | UTP3  | 71555231 | rs1606878  | 0.8843 | 70876844 | A | T | 0.10 | 2.79E-04 | 1.68E-02 | 5.61E-02 |
| rs20002895 | Brain_Hypothalamus | 4 | RUFY3 | 71621775 | rs1606878  | 0.8843 | 70876844 | A | T | 0.10 | 2.79E-04 | 4.77E-02 | 9.30E-02 |
| rs20002895 | Brain_Hypothalamus | 4 | DCK   | 71877443 | rs1606878  | 0.8843 | 70876844 | A | T | 0.10 | 2.79E-04 | 7.65E-03 | 4.12E-02 |
| rs20002895 | Brain_Hypothalamus | 4 | UTP3  | 71555231 | rs28799286 | 0.8843 | 70878782 | T | C | 0.10 | 2.79E-04 | 3.29E-02 | 7.66E-02 |
| rs20002895 | Brain_Hypothalamus | 4 | DCK   | 71877443 | rs28799286 | 0.8843 | 70878782 | T | C | 0.10 | 2.79E-04 | 7.00E-03 | 3.99E-02 |
| rs20002895 | Brain_Hypothalamus | 4 | UTP3  | 71555231 | rs1083135  | 0.8843 | 70881127 | C | T | 0.11 | 8.15E-05 | 1.17E-02 | 3.98E-02 |
| rs20002895 | Brain_Hypothalamus | 4 | RUFY3 | 71621775 | rs1083135  | 0.8843 | 70881127 | C | T | 0.11 | 8.15E-05 | 2.46E-02 | 5.75E-02 |
| rs20002895 | Brain_Hypothalamus | 4 | DCK   | 71877443 | rs1083135  | 0.8843 | 70881127 | C | T | 0.11 | 8.15E-05 | 9.45E-03 | 3.61E-02 |
| rs20002895 | Brain_Hypothalamus | 4 | UTP3  | 71555231 | rs79704056 | 0.8843 | 70885815 | G | A | 0.10 | 2.93E-04 | 1.17E-02 | 4.90E-02 |
| rs20002895 | Brain_Hypothalamus | 4 | RUFY3 | 71621775 | rs79704056 | 0.8843 | 70885815 | G | A | 0.10 | 2.93E-04 | 2.46E-02 | 6.72E-02 |

|            |                    |   |       |          |             |        |          |   |   |      |          |          |          |
|------------|--------------------|---|-------|----------|-------------|--------|----------|---|---|------|----------|----------|----------|
| rs20002895 | Brain_Hypothalamus | 4 | DCK   | 71877443 | rs79704056  | 0.8843 | 70885815 | G | A | 0.10 | 2.93E-04 | 9.45E-03 | 4.51E-02 |
| rs20002895 | Brain_Hypothalamus | 4 | UTP3  | 71555231 | rs776841    | 0.8843 | 70889307 | C | G | 0.11 | 8.15E-05 | 1.17E-02 | 3.98E-02 |
| rs20002895 | Brain_Hypothalamus | 4 | RUFY3 | 71621775 | rs776841    | 0.8843 | 70889307 | C | G | 0.11 | 8.15E-05 | 2.46E-02 | 5.75E-02 |
| rs20002895 | Brain_Hypothalamus | 4 | DCK   | 71877443 | rs776841    | 0.8843 | 70889307 | C | G | 0.11 | 8.15E-05 | 9.45E-03 | 3.61E-02 |
| rs20002895 | Brain_Hypothalamus | 4 | UTP3  | 71555231 | rs10017681  | 0.8843 | 70889847 | G | A | 0.10 | 2.67E-04 | 3.18E-02 | 7.50E-02 |
| rs20002895 | Brain_Hypothalamus | 4 | RUFY3 | 71621775 | rs10017681  | 0.8843 | 70889847 | G | A | 0.10 | 2.67E-04 | 4.28E-02 | 8.73E-02 |
| rs20002895 | Brain_Hypothalamus | 4 | DCK   | 71877443 | rs10017681  | 0.8843 | 70889847 | G | A | 0.10 | 2.67E-04 | 1.10E-02 | 4.69E-02 |
| rs20002895 | Brain_Hypothalamus | 4 | UTP3  | 71555231 | rs800756    | 0.8843 | 70897507 | C | T | 0.11 | 8.15E-05 | 1.17E-02 | 3.98E-02 |
| rs20002895 | Brain_Hypothalamus | 4 | RUFY3 | 71621775 | rs800756    | 0.8843 | 70897507 | C | T | 0.11 | 8.15E-05 | 2.46E-02 | 5.75E-02 |
| rs20002895 | Brain_Hypothalamus | 4 | DCK   | 71877443 | rs800756    | 0.8843 | 70897507 | C | T | 0.11 | 8.15E-05 | 9.45E-03 | 3.61E-02 |
| rs20002895 | Brain_Hypothalamus | 4 | UTP3  | 71555231 | rs1849937   | 0.8843 | 70898907 | T | C | 0.10 | 2.93E-04 | 2.34E-02 | 6.57E-02 |
| rs20002895 | Brain_Hypothalamus | 4 | RUFY3 | 71621775 | rs1849937   | 0.8843 | 70898907 | T | C | 0.10 | 2.93E-04 | 3.10E-02 | 7.51E-02 |
| rs20002895 | Brain_Hypothalamus | 4 | DCK   | 71877443 | rs1849937   | 0.8843 | 70898907 | T | C | 0.10 | 2.93E-04 | 8.85E-03 | 4.40E-02 |
| rs20002895 | Brain_Hypothalamus | 4 | UTP3  | 71555231 | rs28707754  | 0.8843 | 70900864 | T | C | 0.10 | 2.67E-04 | 1.68E-02 | 5.58E-02 |
| rs20002895 | Brain_Hypothalamus | 4 | RUFY3 | 71621775 | rs28707754  | 0.8843 | 70900864 | T | C | 0.10 | 2.67E-04 | 4.77E-02 | 9.26E-02 |
| rs20002895 | Brain_Hypothalamus | 4 | DCK   | 71877443 | rs28707754  | 0.8843 | 70900864 | T | C | 0.10 | 2.67E-04 | 7.65E-03 | 4.08E-02 |
| rs20002895 | Brain_Hypothalamus | 4 | UTP3  | 71555231 | rs4694040   | 0.8843 | 70901653 | A | G | 0.10 | 2.67E-04 | 1.60E-02 | 5.46E-02 |
| rs20002895 | Brain_Hypothalamus | 4 | RUFY3 | 71621775 | rs4694040   | 0.8843 | 70901653 | A | G | 0.10 | 2.67E-04 | 4.38E-02 | 8.84E-02 |
| rs20002895 | Brain_Hypothalamus | 4 | DCK   | 71877443 | rs4694040   | 0.8843 | 70901653 | A | G | 0.10 | 2.67E-04 | 7.47E-03 | 4.05E-02 |
| rs20002895 | Brain_Hypothalamus | 4 | UTP3  | 71555231 | rs7654757   | 0.8843 | 70902412 | T | C | 0.10 | 2.67E-04 | 1.68E-02 | 5.58E-02 |
| rs20002895 | Brain_Hypothalamus | 4 | RUFY3 | 71621775 | rs7654757   | 0.8843 | 70902412 | T | C | 0.10 | 2.67E-04 | 4.77E-02 | 9.26E-02 |
| rs20002895 | Brain_Hypothalamus | 4 | DCK   | 71877443 | rs7654757   | 0.8843 | 70902412 | T | C | 0.10 | 2.67E-04 | 7.65E-03 | 4.08E-02 |
| rs20002895 | Brain_Hypothalamus | 4 | DCK   | 71877443 | rs148867082 | 0.9206 | 70903438 | T | C | 0.11 | 3.76E-05 | 1.52E-03 | 1.58E-02 |
| rs20002895 | Brain_Hypothalamus | 4 | DCK   | 71877443 | rs146349142 | 0.9206 | 70903526 | G | A | 0.11 | 3.37E-05 | 3.64E-03 | 2.16E-02 |
| rs20002895 | Brain_Hypothalamus | 4 | UTP3  | 71555231 | rs6855909   | 0.9206 | 70904992 | C | A | 0.10 | 5.05E-05 | 1.17E-02 | 3.79E-02 |
| rs20002895 | Brain_Hypothalamus | 4 | RUFY3 | 71621775 | rs6855909   | 0.9206 | 70904992 | C | A | 0.10 | 5.05E-05 | 2.46E-02 | 5.54E-02 |
| rs20002895 | Brain_Hypothalamus | 4 | DCK   | 71877443 | rs6855909   | 0.9206 | 70904992 | C | A | 0.10 | 5.05E-05 | 9.45E-03 | 3.42E-02 |
| rs20002895 | Brain_Hypothalamus | 4 | UTP3  | 71555231 | rs13434441  | 0.9206 | 70905397 | C | T | 0.10 | 1.93E-04 | 1.17E-02 | 4.61E-02 |
| rs20002895 | Brain_Hypothalamus | 4 | RUFY3 | 71621775 | rs13434441  | 0.9206 | 70905397 | C | T | 0.10 | 1.93E-04 | 2.46E-02 | 6.42E-02 |
| rs20002895 | Brain_Hypothalamus | 4 | DCK   | 71877443 | rs13434441  | 0.9206 | 70905397 | C | T | 0.10 | 1.93E-04 | 9.45E-03 | 4.23E-02 |
| rs20002895 | Brain_Hypothalamus | 4 | UTP3  | 71555231 | rs6843256   | 0.9113 | 70906988 | A | G | 0.11 | 4.05E-05 | 4.85E-02 | 8.16E-02 |
| rs20002895 | Brain_Hypothalamus | 4 | DCK   | 71877443 | rs6843256   | 0.9113 | 70906988 | A | G | 0.11 | 4.05E-05 | 3.36E-03 | 2.15E-02 |
| rs20002895 | Brain_Hypothalamus | 4 | UTP3  | 71555231 | rs6845010   | 0.9206 | 70907119 | A | C | 0.10 | 3.01E-05 | 1.17E-02 | 3.62E-02 |
| rs20002895 | Brain_Hypothalamus | 4 | RUFY3 | 71621775 | rs6845010   | 0.9206 | 70907119 | A | C | 0.10 | 3.01E-05 | 2.46E-02 | 5.35E-02 |
| rs20002895 | Brain_Hypothalamus | 4 | DCK   | 71877443 | rs6845010   | 0.9206 | 70907119 | A | C | 0.10 | 3.01E-05 | 9.45E-03 | 3.26E-02 |
| rs20002895 | Brain_Hypothalamus | 4 | UTP3  | 71555231 | rs28643541  | 0.9407 | 70912133 | A | G | 0.11 | 7.92E-05 | 8.36E-03 | 3.43E-02 |
| rs20002895 | Brain_Hypothalamus | 4 | RUFY3 | 71621775 | rs28643541  | 0.9407 | 70912133 | A | G | 0.11 | 7.92E-05 | 1.40E-02 | 4.34E-02 |
| rs20002895 | Brain_Hypothalamus | 4 | DCK   | 71877443 | rs28643541  | 0.9407 | 70912133 | A | G | 0.11 | 7.92E-05 | 3.47E-03 | 2.41E-02 |
| rs20002895 | Brain_Hypothalamus | 4 | UTP3  | 71555231 | rs6857697   | 0.9407 | 70914609 | A | C | 0.11 | 6.25E-05 | 1.02E-02 | 3.61E-02 |
| rs20002895 | Brain_Hypothalamus | 4 | RUFY3 | 71621775 | rs6857697   | 0.9407 | 70914609 | A | C | 0.11 | 6.25E-05 | 1.45E-02 | 4.27E-02 |

|            |                    |   |       |          |             |        |          |   |   |      |          |          |          |
|------------|--------------------|---|-------|----------|-------------|--------|----------|---|---|------|----------|----------|----------|
| rs20002895 | Brain_Hypothalamus | 4 | DCK   | 71877443 | rs6857697   | 0.9407 | 70914609 | A | C | 0.11 | 6.25E-05 | 1.50E-02 | 4.35E-02 |
| rs20002895 | Brain_Hypothalamus | 4 | UTP3  | 71555231 | rs3862054   | 0.9407 | 70916273 | T | C | 0.10 | 1.52E-04 | 1.41E-02 | 4.88E-02 |
| rs20002895 | Brain_Hypothalamus | 4 | RUFY3 | 71621775 | rs3862054   | 0.9407 | 70916273 | T | C | 0.10 | 1.52E-04 | 2.78E-02 | 6.70E-02 |
| rs20002895 | Brain_Hypothalamus | 4 | DCK   | 71877443 | rs3862054   | 0.9407 | 70916273 | T | C | 0.10 | 1.52E-04 | 1.25E-02 | 4.63E-02 |
| rs20002895 | Brain_Hypothalamus | 4 | UTP3  | 71555231 | rs6818370   | 0.9307 | 70921069 | T | G | 0.10 | 2.23E-05 | 1.06E-02 | 3.42E-02 |
| rs20002895 | Brain_Hypothalamus | 4 | RUFY3 | 71621775 | rs6818370   | 0.9307 | 70921069 | T | G | 0.10 | 2.23E-05 | 1.85E-02 | 4.56E-02 |
| rs20002895 | Brain_Hypothalamus | 4 | DCK   | 71877443 | rs6818370   | 0.9307 | 70921069 | T | G | 0.10 | 2.23E-05 | 3.30E-02 | 6.33E-02 |
| rs20002895 | Brain_Hypothalamus | 4 | UTP3  | 71555231 | rs10019826  | 0.9407 | 70922064 | A | G | 0.11 | 4.30E-05 | 8.36E-03 | 3.31E-02 |
| rs20002895 | Brain_Hypothalamus | 4 | RUFY3 | 71621775 | rs10019826  | 0.9407 | 70922064 | A | G | 0.11 | 4.30E-05 | 1.40E-02 | 4.20E-02 |
| rs20002895 | Brain_Hypothalamus | 4 | DCK   | 71877443 | rs10019826  | 0.9407 | 70922064 | A | G | 0.11 | 4.30E-05 | 3.47E-03 | 2.30E-02 |
| rs20002895 | Brain_Hypothalamus | 4 | UTP3  | 71555231 | rs28869909  | 0.9407 | 70922226 | C | A | 0.10 | 1.09E-04 | 1.41E-02 | 4.76E-02 |
| rs20002895 | Brain_Hypothalamus | 4 | RUFY3 | 71621775 | rs28869909  | 0.9407 | 70922226 | C | A | 0.10 | 1.09E-04 | 2.78E-02 | 6.57E-02 |
| rs20002895 | Brain_Hypothalamus | 4 | DCK   | 71877443 | rs28869909  | 0.9407 | 70922226 | C | A | 0.10 | 1.09E-04 | 1.25E-02 | 4.51E-02 |
| rs20002895 | Brain_Hypothalamus | 4 | UTP3  | 71555231 | rs115749891 | 1.0000 | 70923658 | A | G | 0.10 | 8.26E-05 | 1.41E-02 | 4.99E-02 |
| rs20002895 | Brain_Hypothalamus | 4 | RUFY3 | 71621775 | rs115749891 | 1.0000 | 70923658 | A | G | 0.10 | 8.26E-05 | 2.78E-02 | 6.81E-02 |
| rs20002895 | Brain_Hypothalamus | 4 | DCK   | 71877443 | rs115749891 | 1.0000 | 70923658 | A | G | 0.10 | 8.26E-05 | 1.25E-02 | 4.73E-02 |
| rs20002895 | Brain_Hypothalamus | 4 | UTP3  | 71555231 | rs200028958 | 1.0000 | 70923661 | A | G | 0.10 | 6.25E-06 | 1.41E-02 | 3.49E-02 |
| rs20002895 | Brain_Hypothalamus | 4 | RUFY3 | 71621775 | rs200028958 | 1.0000 | 70923661 | A | G | 0.10 | 6.25E-06 | 2.78E-02 | 5.21E-02 |
| rs20002895 | Brain_Hypothalamus | 4 | DCK   | 71877443 | rs200028958 | 1.0000 | 70923661 | A | G | 0.10 | 6.25E-06 | 1.25E-02 | 3.26E-02 |
| rs20002895 | Brain_Hypothalamus | 4 | UTP3  | 71555231 | rs201171800 | 1.0000 | 70923663 | A | G | 0.10 | 6.25E-06 | 1.41E-02 | 3.49E-02 |
| rs20002895 | Brain_Hypothalamus | 4 | RUFY3 | 71621775 | rs201171800 | 1.0000 | 70923663 | A | G | 0.10 | 6.25E-06 | 2.78E-02 | 5.21E-02 |
| rs20002895 | Brain_Hypothalamus | 4 | DCK   | 71877443 | rs201171800 | 1.0000 | 70923663 | A | G | 0.10 | 6.25E-06 | 1.25E-02 | 3.26E-02 |
| rs20002895 | Brain_Hypothalamus | 4 | UTP3  | 71555231 | rs202245754 | 1.0000 | 70923665 | C | A | 0.10 | 6.25E-06 | 1.41E-02 | 3.49E-02 |
| rs20002895 | Brain_Hypothalamus | 4 | RUFY3 | 71621775 | rs202245754 | 1.0000 | 70923665 | C | A | 0.10 | 6.25E-06 | 2.78E-02 | 5.21E-02 |
| rs20002895 | Brain_Hypothalamus | 4 | DCK   | 71877443 | rs202245754 | 1.0000 | 70923665 | C | A | 0.10 | 6.25E-06 | 1.25E-02 | 3.26E-02 |
| rs20002895 | Brain_Hypothalamus | 4 | UTP3  | 71555231 | rs200349247 | 1.0000 | 70923666 | A | T | 0.10 | 6.25E-06 | 1.41E-02 | 3.49E-02 |
| rs20002895 | Brain_Hypothalamus | 4 | RUFY3 | 71621775 | rs200349247 | 1.0000 | 70923666 | A | T | 0.10 | 6.25E-06 | 2.78E-02 | 5.21E-02 |
| rs20002895 | Brain_Hypothalamus | 4 | DCK   | 71877443 | rs200349247 | 1.0000 | 70923666 | A | T | 0.10 | 6.25E-06 | 1.25E-02 | 3.26E-02 |
| rs20002895 | Brain_Hypothalamus | 4 | UTP3  | 71555231 | rs28790602  | 0.9407 | 70928040 | A | G | 0.10 | 1.10E-04 | 1.54E-02 | 4.95E-02 |
| rs20002895 | Brain_Hypothalamus | 4 | RUFY3 | 71621775 | rs28790602  | 0.9407 | 70928040 | A | G | 0.10 | 1.10E-04 | 3.00E-02 | 6.84E-02 |
| rs20002895 | Brain_Hypothalamus | 4 | DCK   | 71877443 | rs28790602  | 0.9407 | 70928040 | A | G | 0.10 | 1.10E-04 | 1.21E-02 | 4.45E-02 |
| rs20002895 | Brain_Hypothalamus | 4 | UTP3  | 71555231 | rs4694265   | 0.9407 | 70928571 | A | G | 0.10 | 1.10E-04 | 1.41E-02 | 4.77E-02 |
| rs20002895 | Brain_Hypothalamus | 4 | RUFY3 | 71621775 | rs4694265   | 0.9407 | 70928571 | A | G | 0.10 | 1.10E-04 | 2.78E-02 | 6.58E-02 |
| rs20002895 | Brain_Hypothalamus | 4 | DCK   | 71877443 | rs4694265   | 0.9407 | 70928571 | A | G | 0.10 | 1.10E-04 | 1.25E-02 | 4.52E-02 |
| rs20002895 | Brain_Hypothalamus | 4 | UTP3  | 71555231 | rs28635879  | 0.9407 | 70929763 | T | C | 0.10 | 1.22E-04 | 1.02E-02 | 4.22E-02 |
| rs20002895 | Brain_Hypothalamus | 4 | RUFY3 | 71621775 | rs28635879  | 0.9407 | 70929763 | T | C | 0.10 | 1.22E-04 | 1.45E-02 | 4.90E-02 |
| rs20002895 | Brain_Hypothalamus | 4 | DCK   | 71877443 | rs28635879  | 0.9407 | 70929763 | T | C | 0.10 | 1.22E-04 | 1.50E-02 | 4.98E-02 |
| rs20002895 | Brain_Hypothalamus | 4 | UTP3  | 71555231 | rs28622022  | 0.9407 | 70929889 | T | A | 0.10 | 1.12E-04 | 1.11E-02 | 4.31E-02 |
| rs20002895 | Brain_Hypothalamus | 4 | RUFY3 | 71621775 | rs28622022  | 0.9407 | 70929889 | T | A | 0.10 | 1.12E-04 | 2.41E-02 | 6.15E-02 |
| rs20002895 | Brain_Hypothalamus | 4 | DCK   | 71877443 | rs28622022  | 0.9407 | 70929889 | T | A | 0.10 | 1.12E-04 | 7.30E-03 | 3.63E-02 |

|            |                    |   |       |          |            |        |          |   |   |      |          |          |          |
|------------|--------------------|---|-------|----------|------------|--------|----------|---|---|------|----------|----------|----------|
| rs20002895 | Brain_Hypothalamus | 4 | UTP3  | 71555231 | rs6832546  | 0.9407 | 70930584 | T | G | 0.10 | 1.22E-04 | 1.02E-02 | 4.22E-02 |
| rs20002895 | Brain_Hypothalamus | 4 | RUFY3 | 71621775 | rs6832546  | 0.9407 | 70930584 | T | G | 0.10 | 1.22E-04 | 1.45E-02 | 4.90E-02 |
| rs20002895 | Brain_Hypothalamus | 4 | DCK   | 71877443 | rs6832546  | 0.9407 | 70930584 | T | G | 0.10 | 1.22E-04 | 1.50E-02 | 4.98E-02 |
| rs20002895 | Brain_Hypothalamus | 4 | UTP3  | 71555231 | rs17148034 | 0.9122 | 70937524 | G | C | 0.10 | 2.93E-04 | 1.02E-02 | 4.45E-02 |
| rs20002895 | Brain_Hypothalamus | 4 | RUFY3 | 71621775 | rs17148034 | 0.9122 | 70937524 | G | C | 0.10 | 2.93E-04 | 2.35E-02 | 6.37E-02 |
| rs20002895 | Brain_Hypothalamus | 4 | DCK   | 71877443 | rs17148034 | 0.9122 | 70937524 | G | C | 0.10 | 2.93E-04 | 6.59E-03 | 3.77E-02 |
| rs20002895 | Brain_Hypothalamus | 4 | UTP3  | 71555231 | rs7660022  | 0.9314 | 70943619 | A | C | 0.10 | 2.25E-04 | 7.88E-03 | 4.01E-02 |
| rs20002895 | Brain_Hypothalamus | 4 | RUFY3 | 71621775 | rs7660022  | 0.9314 | 70943619 | A | C | 0.10 | 2.25E-04 | 1.24E-02 | 4.80E-02 |
| rs20002895 | Brain_Hypothalamus | 4 | DCK   | 71877443 | rs7660022  | 0.9314 | 70943619 | A | C | 0.10 | 2.25E-04 | 8.49E-03 | 4.13E-02 |
| rs20002895 | Brain_Hypothalamus | 4 | UTP3  | 71555231 | rs10004471 | 0.9314 | 70950312 | C | A | 0.10 | 2.25E-04 | 1.72E-02 | 5.52E-02 |
| rs20002895 | Brain_Hypothalamus | 4 | RUFY3 | 71621775 | rs10004471 | 0.9314 | 70950312 | C | A | 0.10 | 2.25E-04 | 1.75E-02 | 5.56E-02 |
| rs20002895 | Brain_Hypothalamus | 4 | DCK   | 71877443 | rs10004471 | 0.9314 | 70950312 | C | A | 0.10 | 2.25E-04 | 1.36E-02 | 4.99E-02 |
| rs20002895 | Brain_Hypothalamus | 4 | UTP3  | 71555231 | rs28489946 | 0.9314 | 70952099 | C | T | 0.10 | 2.25E-04 | 7.88E-03 | 4.01E-02 |
| rs20002895 | Brain_Hypothalamus | 4 | RUFY3 | 71621775 | rs28489946 | 0.9314 | 70952099 | C | T | 0.10 | 2.25E-04 | 1.24E-02 | 4.80E-02 |
| rs20002895 | Brain_Hypothalamus | 4 | DCK   | 71877443 | rs28489946 | 0.9314 | 70952099 | C | T | 0.10 | 2.25E-04 | 8.49E-03 | 4.13E-02 |
| rs20002895 | Brain_Hypothalamus | 4 | UTP3  | 71555231 | rs7666225  | 0.9314 | 70959484 | C | T | 0.10 | 2.24E-04 | 1.25E-02 | 4.81E-02 |
| rs20002895 | Brain_Hypothalamus | 4 | RUFY3 | 71621775 | rs7666225  | 0.9314 | 70959484 | C | T | 0.10 | 2.24E-04 | 1.94E-02 | 5.82E-02 |
| rs20002895 | Brain_Hypothalamus | 4 | DCK   | 71877443 | rs7666225  | 0.9314 | 70959484 | C | T | 0.10 | 2.24E-04 | 1.36E-02 | 4.99E-02 |
| rs20002895 | Brain_Hypothalamus | 4 | UTP3  | 71555231 | rs4694041  | 0.9314 | 70961196 | G | C | 0.10 | 2.24E-04 | 7.88E-03 | 4.01E-02 |
| rs20002895 | Brain_Hypothalamus | 4 | RUFY3 | 71621775 | rs4694041  | 0.9314 | 70961196 | G | C | 0.10 | 2.24E-04 | 1.24E-02 | 4.80E-02 |
| rs20002895 | Brain_Hypothalamus | 4 | DCK   | 71877443 | rs4694041  | 0.9314 | 70961196 | G | C | 0.10 | 2.24E-04 | 8.49E-03 | 4.13E-02 |
| rs20002895 | Brain_Hypothalamus | 4 | UTP3  | 71555231 | rs28434698 | 0.9314 | 70965054 | C | T | 0.10 | 2.10E-04 | 7.88E-03 | 3.98E-02 |
| rs20002895 | Brain_Hypothalamus | 4 | RUFY3 | 71621775 | rs28434698 | 0.9314 | 70965054 | C | T | 0.10 | 2.10E-04 | 1.24E-02 | 4.76E-02 |
| rs20002895 | Brain_Hypothalamus | 4 | DCK   | 71877443 | rs28434698 | 0.9314 | 70965054 | C | T | 0.10 | 2.10E-04 | 8.49E-03 | 4.09E-02 |
| rs20002895 | Brain_Hypothalamus | 4 | UTP3  | 71555231 | rs12331580 | 0.9314 | 70973499 | A | C | 0.10 | 2.87E-04 | 6.41E-03 | 3.78E-02 |
| rs20002895 | Brain_Hypothalamus | 4 | RUFY3 | 71621775 | rs12331580 | 0.9314 | 70973499 | A | C | 0.10 | 2.87E-04 | 1.33E-02 | 5.01E-02 |
| rs20002895 | Brain_Hypothalamus | 4 | DCK   | 71877443 | rs12331580 | 0.9314 | 70973499 | A | C | 0.10 | 2.87E-04 | 2.23E-03 | 2.69E-02 |
| rs20002895 | Brain_Hypothalamus | 4 | UTP3  | 71555231 | rs17148162 | 0.9213 | 70974741 | A | C | 0.10 | 4.65E-04 | 1.11E-02 | 4.94E-02 |
| rs20002895 | Brain_Hypothalamus | 4 | RUFY3 | 71621775 | rs17148162 | 0.9213 | 70974741 | A | C | 0.10 | 4.65E-04 | 2.98E-02 | 7.51E-02 |
| rs20002895 | Brain_Hypothalamus | 4 | DCK   | 71877443 | rs17148162 | 0.9213 | 70974741 | A | C | 0.10 | 4.65E-04 | 6.53E-03 | 4.08E-02 |
| rs20002895 | Brain_Hypothalamus | 4 | UTP3  | 71555231 | rs4694043  | 0.9213 | 70975541 | C | G | 0.10 | 4.29E-04 | 2.53E-02 | 6.92E-02 |
| rs20002895 | Brain_Hypothalamus | 4 | RUFY3 | 71621775 | rs4694043  | 0.9213 | 70975541 | C | G | 0.10 | 4.29E-04 | 3.22E-02 | 7.76E-02 |
| rs20002895 | Brain_Hypothalamus | 4 | DCK   | 71877443 | rs4694043  | 0.9213 | 70975541 | C | G | 0.10 | 4.29E-04 | 5.02E-03 | 3.71E-02 |
| rs20002895 | Brain_Hypothalamus | 4 | UTP3  | 71555231 | rs28645990 | 0.9213 | 70977161 | G | T | 0.10 | 4.29E-04 | 1.36E-02 | 5.31E-02 |
| rs20002895 | Brain_Hypothalamus | 4 | RUFY3 | 71621775 | rs28645990 | 0.9213 | 70977161 | G | T | 0.10 | 4.29E-04 | 2.65E-02 | 7.07E-02 |
| rs20002895 | Brain_Hypothalamus | 4 | DCK   | 71877443 | rs28645990 | 0.9213 | 70977161 | G | T | 0.10 | 4.29E-04 | 5.62E-03 | 3.85E-02 |
| rs20002895 | Brain_Hypothalamus | 4 | UTP3  | 71555231 | rs17148181 | 0.9213 | 70981462 | T | C | 0.10 | 3.67E-04 | 1.09E-02 | 4.72E-02 |
| rs20002895 | Brain_Hypothalamus | 4 | RUFY3 | 71621775 | rs17148181 | 0.9213 | 70981462 | T | C | 0.10 | 3.67E-04 | 2.41E-02 | 6.61E-02 |
| rs20002895 | Brain_Hypothalamus | 4 | DCK   | 71877443 | rs17148181 | 0.9213 | 70981462 | T | C | 0.10 | 3.67E-04 | 6.74E-03 | 3.95E-02 |
| rs20002895 | Brain_Hypothalamus | 4 | UTP3  | 71555231 | rs17148184 | 0.9213 | 70981602 | T | A | 0.10 | 4.29E-04 | 3.01E-02 | 7.50E-02 |

|            |                                       |   |              |          |             |        |          |   |   |      |          |          |          |
|------------|---------------------------------------|---|--------------|----------|-------------|--------|----------|---|---|------|----------|----------|----------|
| rs20002895 | Brain_Hypothalamus                    | 4 | RUFY3        | 71621775 | rs17148184  | 0.9213 | 70981602 | T | A | 0.10 | 4.29E-04 | 2.30E-02 | 6.63E-02 |
| rs20002895 | Brain_Hypothalamus                    | 4 | DCK          | 71877443 | rs17148184  | 0.9213 | 70981602 | T | A | 0.10 | 4.29E-04 | 1.04E-02 | 4.77E-02 |
| rs20002895 | Brain_Hypothalamus                    | 4 | UTP3         | 71555231 | rs55989074  | 0.9213 | 70982256 | A | T | 0.10 | 2.45E-04 | 1.36E-02 | 5.15E-02 |
| rs20002895 | Brain_Hypothalamus                    | 4 | RUFY3        | 71621775 | rs55989074  | 0.9213 | 70982256 | A | T | 0.10 | 2.45E-04 | 2.65E-02 | 6.91E-02 |
| rs20002895 | Brain_Hypothalamus                    | 4 | DCK          | 71877443 | rs55989074  | 0.9213 | 70982256 | A | T | 0.10 | 2.45E-04 | 5.62E-03 | 3.70E-02 |
| rs20002895 | Brain_Hypothalamus                    | 4 | UTP3         | 71555231 | rs138807640 | 0.9213 | 70984155 | A | G | 0.10 | 2.36E-04 | 1.36E-02 | 5.11E-02 |
| rs20002895 | Brain_Hypothalamus                    | 4 | RUFY3        | 71621775 | rs138807640 | 0.9213 | 70984155 | A | G | 0.10 | 2.36E-04 | 2.65E-02 | 6.87E-02 |
| rs20002895 | Brain_Hypothalamus                    | 4 | DCK          | 71877443 | rs138807640 | 0.9213 | 70984155 | A | G | 0.10 | 2.36E-04 | 5.62E-03 | 3.67E-02 |
| rs20002895 | Brain_Hypothalamus                    | 4 | UTP3         | 71555231 | rs116572259 | 0.9213 | 70984463 | C | T | 0.10 | 1.99E-04 | 1.09E-02 | 4.53E-02 |
| rs20002895 | Brain_Hypothalamus                    | 4 | RUFY3        | 71621775 | rs116572259 | 0.9213 | 70984463 | C | T | 0.10 | 1.99E-04 | 2.41E-02 | 6.41E-02 |
| rs20002895 | Brain_Hypothalamus                    | 4 | DCK          | 71877443 | rs116572259 | 0.9213 | 70984463 | C | T | 0.10 | 1.99E-04 | 6.74E-03 | 3.76E-02 |
| rs20002895 | Brain_Hypothalamus                    | 4 | UTP3         | 71555231 | rs10011994  | 0.9021 | 70987026 | A | T | 0.10 | 1.78E-04 | 1.09E-02 | 4.48E-02 |
| rs20002895 | Brain_Hypothalamus                    | 4 | RUFY3        | 71621775 | rs10011994  | 0.9021 | 70987026 | A | T | 0.10 | 1.78E-04 | 2.41E-02 | 6.35E-02 |
| rs20002895 | Brain_Hypothalamus                    | 4 | DCK          | 71877443 | rs10011994  | 0.9021 | 70987026 | A | T | 0.10 | 1.78E-04 | 6.74E-03 | 3.72E-02 |
| rs20002895 | Brain_Hypothalamus                    | 4 | UTP3         | 71555231 | rs28866208  | 0.9021 | 70987317 | G | A | 0.10 | 1.78E-04 | 1.09E-02 | 4.48E-02 |
| rs20002895 | Brain_Hypothalamus                    | 4 | RUFY3        | 71621775 | rs28866208  | 0.9021 | 70987317 | G | A | 0.10 | 1.78E-04 | 2.41E-02 | 6.35E-02 |
| rs20002895 | Brain_Hypothalamus                    | 4 | DCK          | 71877443 | rs28866208  | 0.9021 | 70987317 | G | A | 0.10 | 1.78E-04 | 6.74E-03 | 3.72E-02 |
| rs20002895 | Brain_Hypothalamus                    | 4 | UTP3         | 71555231 | rs7356162   | 0.9021 | 70987982 | G | T | 0.11 | 4.61E-04 | 2.94E-02 | 7.57E-02 |
| rs20002895 | Brain_Hypothalamus                    | 4 | RUFY3        | 71621775 | rs7356162   | 0.9021 | 70987982 | G | T | 0.11 | 4.61E-04 | 4.66E-02 | 9.49E-02 |
| rs20002895 | Brain_Hypothalamus                    | 4 | DCK          | 71877443 | rs7356162   | 0.9021 | 70987982 | G | T | 0.11 | 4.61E-04 | 2.02E-02 | 6.39E-02 |
| rs20002895 | Brain_Hypothalamus                    | 4 | UTP3         | 71555231 | rs28870732  | 0.9021 | 70989432 | A | C | 0.11 | 4.67E-04 | 2.30E-02 | 6.78E-02 |
| rs20002895 | Brain_Hypothalamus                    | 4 | RUFY3        | 71621775 | rs28870732  | 0.9021 | 70989432 | A | C | 0.11 | 4.67E-04 | 4.88E-02 | 9.74E-02 |
| rs20002895 | Brain_Hypothalamus                    | 4 | DCK          | 71877443 | rs28870732  | 0.9021 | 70989432 | A | C | 0.11 | 4.67E-04 | 2.44E-02 | 6.96E-02 |
| rs20002895 | Brain_Hypothalamus                    | 4 | UTP3         | 71555231 | rs28793967  | 0.9021 | 70989703 | T | C | 0.11 | 4.67E-04 | 2.30E-02 | 6.78E-02 |
| rs20002895 | Brain_Hypothalamus                    | 4 | RUFY3        | 71621775 | rs28793967  | 0.9021 | 70989703 | T | C | 0.11 | 4.67E-04 | 4.88E-02 | 9.74E-02 |
| rs20002895 | Brain_Hypothalamus                    | 4 | DCK          | 71877443 | rs28793967  | 0.9021 | 70989703 | T | C | 0.11 | 4.67E-04 | 2.44E-02 | 6.96E-02 |
| rs20002895 | Brain_Hypothalamus                    | 4 | UTP3         | 71555231 | rs1607989   | 0.9021 | 70990224 | G | A | 0.11 | 3.41E-04 | 1.88E-02 | 6.08E-02 |
| rs20002895 | Brain_Hypothalamus                    | 4 | DCK          | 71877443 | rs1607989   | 0.9021 | 70990224 | G | A | 0.11 | 3.41E-04 | 2.97E-02 | 7.47E-02 |
| rs20002895 | Brain_Hypothalamus                    | 4 | UTP3         | 71555231 | rs10007698  | 0.9021 | 70990879 | C | T | 0.10 | 1.26E-04 | 3.86E-02 | 7.94E-02 |
| rs20002895 | Brain_Hypothalamus                    | 4 | RUFY3        | 71621775 | rs10007698  | 0.9021 | 70990879 | C | T | 0.10 | 1.26E-04 | 2.01E-02 | 5.71E-02 |
| rs20002895 | Brain_Hypothalamus                    | 4 | DCK          | 71877443 | rs10007698  | 0.9021 | 70990879 | C | T | 0.10 | 1.26E-04 | 1.24E-02 | 4.60E-02 |
| rs20002895 | Brain_Nucleus_accumbens_basal_ganglia | 4 | MOB1B        | 71810964 | rs10004471  | 0.9314 | 70950312 | C | A | 0.10 | 2.25E-04 | 3.85E-02 | 8.13E-02 |
| rs20002895 | Brain_Nucleus_accumbens_basal_ganglia | 4 | MOB1B        | 71810964 | rs7666225   | 0.9314 | 70959484 | C | T | 0.10 | 2.24E-04 | 3.30E-02 | 7.51E-02 |
| rs20002895 | Brain_Nucleus_accumbens_basal_ganglia | 4 | DCK          | 71877443 | rs4694043   | 0.9213 | 70975541 | C | G | 0.10 | 4.29E-04 | 3.12E-02 | 7.63E-02 |
| rs20002895 | Brain_Nucleus_accumbens_basal_ganglia | 4 | DCK          | 71877443 | rs28645990  | 0.9213 | 70977161 | G | T | 0.10 | 4.29E-04 | 3.01E-02 | 7.51E-02 |
| rs20002895 | Brain_Nucleus_accumbens_basal_ganglia | 4 | DCK          | 71877443 | rs10007698  | 0.9021 | 70990879 | C | T | 0.10 | 1.26E-04 | 4.10E-02 | 8.20E-02 |
| rs20002895 | Brain_Putamen_basal_ganglia           | 4 | UTP3         | 71555231 | rs1231535   | 0.8743 | 70875649 | T | C | 0.13 | 8.58E-05 | 3.71E-02 | 7.39E-02 |
| rs20002895 | Brain_Spinal_cord_cervical_c-1        | 4 | UTP3         | 71555231 | rs2029572   | 0.8324 | 70810063 | A | G | 0.10 | 1.75E-04 | 1.96E-02 | 5.79E-02 |
| rs20002895 | Brain_Spinal_cord_cervical_c-1        | 4 | UTP3         | 71555231 | rs9994880   | 0.8324 | 70811070 | C | T | 0.10 | 1.95E-04 | 8.00E-03 | 4.00E-02 |
| rs20002895 | Brain_Spinal_cord_cervical_c-1        | 4 | RP11-46J23.1 | 71569836 | rs9994880   | 0.8324 | 70811070 | C | T | 0.10 | 1.95E-04 | 3.72E-02 | 7.96E-02 |

|            |                                |   |              |          |             |        |          |   |   |      |          |          |          |
|------------|--------------------------------|---|--------------|----------|-------------|--------|----------|---|---|------|----------|----------|----------|
| rs20002895 | Brain_Spinal_cord_cervical_c-1 | 4 | UTP3         | 71555231 | rs9992853   | 0.8324 | 70811521 | G | A | 0.10 | 1.95E-04 | 8.00E-03 | 4.00E-02 |
| rs20002895 | Brain_Spinal_cord_cervical_c-1 | 4 | RP11-46J23.1 | 71569836 | rs9992853   | 0.8324 | 70811521 | G | A | 0.10 | 1.95E-04 | 3.72E-02 | 7.96E-02 |
| rs20002895 | Brain_Spinal_cord_cervical_c-1 | 4 | UTP3         | 71555231 | rs10013848  | 0.8324 | 70816927 | A | T | 0.10 | 1.50E-04 | 8.00E-03 | 3.92E-02 |
| rs20002895 | Brain_Spinal_cord_cervical_c-1 | 4 | RP11-46J23.1 | 71569836 | rs10013848  | 0.8324 | 70816927 | A | T | 0.10 | 1.50E-04 | 3.72E-02 | 7.86E-02 |
| rs20002895 | Brain_Spinal_cord_cervical_c-1 | 4 | UTP3         | 71555231 | rs2637816   | 0.8324 | 70821025 | G | A | 0.10 | 1.77E-04 | 3.58E-02 | 7.85E-02 |
| rs20002895 | Brain_Spinal_cord_cervical_c-1 | 4 | UTP3         | 71555231 | rs2734570   | 0.8324 | 70821713 | A | G | 0.10 | 1.77E-04 | 9.27E-03 | 4.28E-02 |
| rs20002895 | Brain_Spinal_cord_cervical_c-1 | 4 | RP11-46J23.1 | 71569836 | rs2734570   | 0.8324 | 70821713 | A | G | 0.10 | 1.77E-04 | 3.47E-02 | 7.73E-02 |
| rs20002895 | Brain_Spinal_cord_cervical_c-1 | 4 | UTP3         | 71555231 | rs2673720   | 0.8324 | 70825933 | G | A | 0.10 | 1.68E-04 | 1.01E-02 | 4.41E-02 |
| rs20002895 | Brain_Spinal_cord_cervical_c-1 | 4 | RP11-46J23.1 | 71569836 | rs2673720   | 0.8324 | 70825933 | G | A | 0.10 | 1.68E-04 | 3.50E-02 | 7.74E-02 |
| rs20002895 | Brain_Spinal_cord_cervical_c-1 | 4 | UTP3         | 71555231 | rs2247569   | 0.8324 | 70826437 | C | T | 0.10 | 1.68E-04 | 8.00E-03 | 4.03E-02 |
| rs20002895 | Brain_Spinal_cord_cervical_c-1 | 4 | RP11-46J23.1 | 71569836 | rs2247569   | 0.8324 | 70826437 | C | T | 0.10 | 1.68E-04 | 3.72E-02 | 7.99E-02 |
| rs20002895 | Brain_Spinal_cord_cervical_c-1 | 4 | UTP3         | 71555231 | rs186123891 | 0.8324 | 70828593 | A | C | 0.10 | 1.88E-04 | 1.77E-02 | 5.55E-02 |
| rs20002895 | Brain_Spinal_cord_cervical_c-1 | 4 | RP11-46J23.1 | 71569836 | rs28377851  | 0.8423 | 70831724 | T | A | 0.10 | 3.63E-04 | 3.92E-02 | 9.06E-02 |
| rs20002895 | Brain_Spinal_cord_cervical_c-1 | 4 | RP11-46J23.1 | 71569836 | rs35772950  | 0.8423 | 70832941 | A | G | 0.10 | 3.63E-04 | 3.92E-02 | 9.06E-02 |
| rs20002895 | Brain_Spinal_cord_cervical_c-1 | 4 | RP11-46J23.1 | 71569836 | rs28720737  | 0.8423 | 70833223 | G | A | 0.10 | 3.63E-04 | 4.37E-02 | 9.55E-02 |
| rs20002895 | Brain_Spinal_cord_cervical_c-1 | 4 | UTP3         | 71555231 | rs10031238  | 0.8423 | 70833357 | G | T | 0.10 | 3.63E-04 | 4.06E-02 | 9.21E-02 |
| rs20002895 | Brain_Spinal_cord_cervical_c-1 | 4 | RP11-46J23.1 | 71569836 | rs10031238  | 0.8423 | 70833357 | G | T | 0.10 | 3.63E-04 | 4.53E-02 | 9.72E-02 |
| rs20002895 | Brain_Spinal_cord_cervical_c-1 | 4 | RP11-46J23.1 | 71569836 | rs9994584   | 0.8423 | 70833723 | T | G | 0.10 | 3.63E-04 | 3.92E-02 | 9.06E-02 |
| rs20002895 | Brain_Spinal_cord_cervical_c-1 | 4 | UTP3         | 71555231 | rs10031845  | 0.8423 | 70834238 | C | A | 0.10 | 1.44E-04 | 3.93E-02 | 8.10E-02 |
| rs20002895 | Brain_Spinal_cord_cervical_c-1 | 4 | RP11-46J23.1 | 71569836 | rs10031845  | 0.8423 | 70834238 | C | A | 0.10 | 1.44E-04 | 2.67E-02 | 6.64E-02 |
| rs20002895 | Brain_Spinal_cord_cervical_c-1 | 4 | RP11-46J23.1 | 71569836 | rs79406241  | 0.8423 | 70834693 | G | A | 0.10 | 1.44E-04 | 3.68E-02 | 7.82E-02 |
| rs20002895 | Brain_Spinal_cord_cervical_c-1 | 4 | RP11-46J23.1 | 71569836 | rs59453376  | 0.8423 | 70834877 | T | C | 0.10 | 3.72E-04 | 3.92E-02 | 9.09E-02 |
| rs20002895 | Brain_Spinal_cord_cervical_c-1 | 4 | RP11-46J23.1 | 71569836 | rs10000684  | 0.8423 | 70835403 | T | G | 0.10 | 3.72E-04 | 3.92E-02 | 9.09E-02 |
| rs20002895 | Brain_Spinal_cord_cervical_c-1 | 4 | UTP3         | 71555231 | rs10000776  | 0.8423 | 70835520 | C | G | 0.10 | 1.44E-04 | 3.93E-02 | 8.10E-02 |
| rs20002895 | Brain_Spinal_cord_cervical_c-1 | 4 | RP11-46J23.1 | 71569836 | rs10000776  | 0.8423 | 70835520 | C | G | 0.10 | 1.44E-04 | 2.67E-02 | 6.64E-02 |
| rs20002895 | Brain_Spinal_cord_cervical_c-1 | 4 | UTP3         | 71555231 | rs28711127  | 0.8423 | 70836136 | T | G | 0.10 | 5.41E-04 | 3.93E-02 | 8.67E-02 |
| rs20002895 | Brain_Spinal_cord_cervical_c-1 | 4 | RP11-46J23.1 | 71569836 | rs28711127  | 0.8423 | 70836136 | T | G | 0.10 | 5.41E-04 | 2.67E-02 | 7.21E-02 |
| rs20002895 | Brain_Spinal_cord_cervical_c-1 | 4 | UTP3         | 71555231 | rs28508161  | 0.8423 | 70836565 | C | T | 0.10 | 5.41E-04 | 4.46E-02 | 9.25E-02 |
| rs20002895 | Brain_Spinal_cord_cervical_c-1 | 4 | RP11-46J23.1 | 71569836 | rs28508161  | 0.8423 | 70836565 | C | T | 0.10 | 5.41E-04 | 4.29E-02 | 9.06E-02 |
| rs20002895 | Brain_Spinal_cord_cervical_c-1 | 4 | UTP3         | 71555231 | rs28798425  | 0.8423 | 70838306 | G | A | 0.10 | 3.25E-04 | 3.93E-02 | 8.48E-02 |
| rs20002895 | Brain_Spinal_cord_cervical_c-1 | 4 | RP11-46J23.1 | 71569836 | rs28798425  | 0.8423 | 70838306 | G | A | 0.10 | 3.25E-04 | 2.67E-02 | 7.02E-02 |
| rs20002895 | Brain_Spinal_cord_cervical_c-1 | 4 | UTP3         | 71555231 | rs4694261   | 0.8423 | 70839766 | T | C | 0.10 | 3.27E-04 | 3.93E-02 | 8.48E-02 |
| rs20002895 | Brain_Spinal_cord_cervical_c-1 | 4 | RP11-46J23.1 | 71569836 | rs4694261   | 0.8423 | 70839766 | T | C | 0.10 | 3.27E-04 | 2.67E-02 | 7.02E-02 |
| rs20002895 | Brain_Spinal_cord_cervical_c-1 | 4 | UTP3         | 71555231 | rs4694262   | 0.8423 | 70839850 | A | G | 0.10 | 3.27E-04 | 3.93E-02 | 8.48E-02 |
| rs20002895 | Brain_Spinal_cord_cervical_c-1 | 4 | RP11-46J23.1 | 71569836 | rs4694262   | 0.8423 | 70839850 | A | G | 0.10 | 3.27E-04 | 2.67E-02 | 7.02E-02 |
| rs20002895 | Brain_Spinal_cord_cervical_c-1 | 4 | UTP3         | 71555231 | rs7356202   | 0.8423 | 70840436 | T | C | 0.10 | 3.27E-04 | 3.74E-02 | 8.27E-02 |
| rs20002895 | Brain_Spinal_cord_cervical_c-1 | 4 | RP11-46J23.1 | 71569836 | rs7356202   | 0.8423 | 70840436 | T | C | 0.10 | 3.27E-04 | 2.80E-02 | 7.18E-02 |
| rs20002895 | Brain_Spinal_cord_cervical_c-1 | 4 | UTP3         | 71555231 | rs77141872  | 0.8423 | 70841126 | T | C | 0.10 | 3.27E-04 | 3.93E-02 | 8.48E-02 |
| rs20002895 | Brain_Spinal_cord_cervical_c-1 | 4 | RP11-46J23.1 | 71569836 | rs77141872  | 0.8423 | 70841126 | T | C | 0.10 | 3.27E-04 | 2.67E-02 | 7.02E-02 |
| rs20002895 | Brain_Spinal_cord_cervical_c-1 | 4 | UTP3         | 71555231 | rs12648752  | 0.8423 | 70841254 | C | T | 0.10 | 3.27E-04 | 3.93E-02 | 8.48E-02 |

|            |                                |   |              |          |             |        |          |   |   |      |          |          |          |
|------------|--------------------------------|---|--------------|----------|-------------|--------|----------|---|---|------|----------|----------|----------|
| rs20002895 | Brain_Spinal_cord_cervical_c-1 | 4 | RP11-46J23.1 | 71569836 | rs12648752  | 0.8423 | 70841254 | C | T | 0.10 | 3.27E-04 | 2.67E-02 | 7.02E-02 |
| rs20002895 | Brain_Spinal_cord_cervical_c-1 | 4 | UTP3         | 71555231 | rs28786470  | 0.8423 | 70842730 | T | C | 0.10 | 3.25E-04 | 3.93E-02 | 8.48E-02 |
| rs20002895 | Brain_Spinal_cord_cervical_c-1 | 4 | RP11-46J23.1 | 71569836 | rs28786470  | 0.8423 | 70842730 | T | C | 0.10 | 3.25E-04 | 2.67E-02 | 7.02E-02 |
| rs20002895 | Brain_Spinal_cord_cervical_c-1 | 4 | UTP3         | 71555231 | rs17147891  | 0.8423 | 70849978 | T | A | 0.10 | 3.72E-04 | 3.93E-02 | 8.53E-02 |
| rs20002895 | Brain_Spinal_cord_cervical_c-1 | 4 | RP11-46J23.1 | 71569836 | rs17147891  | 0.8423 | 70849978 | T | A | 0.10 | 3.72E-04 | 2.67E-02 | 7.07E-02 |
| rs20002895 | Brain_Spinal_cord_cervical_c-1 | 4 | RP11-46J23.1 | 71569836 | rs28661681  | 0.8843 | 70854978 | T | C | 0.10 | 3.80E-04 | 3.98E-02 | 8.48E-02 |
| rs20002895 | Brain_Spinal_cord_cervical_c-1 | 4 | RP11-46J23.1 | 71569836 | rs4694263   | 0.8843 | 70862927 | C | T | 0.10 | 2.79E-04 | 3.98E-02 | 8.45E-02 |
| rs20002895 | Brain_Spinal_cord_cervical_c-1 | 4 | RP11-46J23.1 | 71569836 | rs3775764   | 0.8843 | 70864065 | A | G | 0.10 | 2.79E-04 | 3.98E-02 | 8.45E-02 |
| rs20002895 | Brain_Spinal_cord_cervical_c-1 | 4 | RP11-46J23.1 | 71569836 | rs1606878   | 0.8843 | 70876844 | A | T | 0.10 | 2.79E-04 | 3.98E-02 | 8.45E-02 |
| rs20002895 | Brain_Spinal_cord_cervical_c-1 | 4 | RP11-46J23.1 | 71569836 | rs1083135   | 0.8843 | 70881127 | C | T | 0.11 | 8.15E-05 | 4.41E-02 | 7.99E-02 |
| rs20002895 | Brain_Spinal_cord_cervical_c-1 | 4 | RP11-46J23.1 | 71569836 | rs79704056  | 0.8843 | 70885815 | G | A | 0.10 | 2.93E-04 | 3.98E-02 | 8.50E-02 |
| rs20002895 | Brain_Spinal_cord_cervical_c-1 | 4 | RP11-46J23.1 | 71569836 | rs776841    | 0.8843 | 70889307 | C | G | 0.11 | 8.15E-05 | 4.41E-02 | 7.99E-02 |
| rs20002895 | Brain_Spinal_cord_cervical_c-1 | 4 | RP11-46J23.1 | 71569836 | rs800756    | 0.8843 | 70897507 | C | T | 0.11 | 8.15E-05 | 4.41E-02 | 7.99E-02 |
| rs20002895 | Brain_Spinal_cord_cervical_c-1 | 4 | RP11-46J23.1 | 71569836 | rs28707754  | 0.8843 | 70900864 | T | C | 0.10 | 2.67E-04 | 3.98E-02 | 8.41E-02 |
| rs20002895 | Brain_Spinal_cord_cervical_c-1 | 4 | RP11-46J23.1 | 71569836 | rs4694040   | 0.8843 | 70901653 | A | G | 0.10 | 2.67E-04 | 4.72E-02 | 9.20E-02 |
| rs20002895 | Brain_Spinal_cord_cervical_c-1 | 4 | RP11-46J23.1 | 71569836 | rs7654757   | 0.8843 | 70902412 | T | C | 0.10 | 2.67E-04 | 3.98E-02 | 8.41E-02 |
| rs20002895 | Brain_Spinal_cord_cervical_c-1 | 4 | RP11-46J23.1 | 71569836 | rs148867082 | 0.9206 | 70903438 | T | C | 0.11 | 3.76E-05 | 3.35E-02 | 6.50E-02 |
| rs20002895 | Brain_Spinal_cord_cervical_c-1 | 4 | RP11-46J23.1 | 71569836 | rs6855909   | 0.9206 | 70904992 | C | A | 0.10 | 5.05E-05 | 4.92E-02 | 8.32E-02 |
| rs20002895 | Brain_Spinal_cord_cervical_c-1 | 4 | RP11-46J23.1 | 71569836 | rs13434441  | 0.9206 | 70905397 | C | T | 0.10 | 1.93E-04 | 4.57E-02 | 8.84E-02 |
| rs20002895 | Brain_Spinal_cord_cervical_c-1 | 4 | RP11-46J23.1 | 71569836 | rs6845010   | 0.9206 | 70907119 | A | C | 0.10 | 3.01E-05 | 4.92E-02 | 8.12E-02 |
| rs20002895 | Brain_Spinal_cord_cervical_c-1 | 4 | UTP3         | 71555231 | rs6818370   | 0.9307 | 70921069 | T | G | 0.10 | 2.23E-05 | 3.35E-02 | 6.39E-02 |
| rs20002895 | Brain_Substantia_nigra         | 4 | RUFY3        | 71621775 | rs2029572   | 0.8324 | 70810063 | A | G | 0.10 | 1.75E-04 | 1.12E-02 | 4.54E-02 |
| rs20002895 | Brain_Substantia_nigra         | 4 | RUFY3        | 71621775 | rs9994880   | 0.8324 | 70811070 | C | T | 0.10 | 1.95E-04 | 2.33E-02 | 6.29E-02 |
| rs20002895 | Brain_Substantia_nigra         | 4 | RUFY3        | 71621775 | rs9992853   | 0.8324 | 70811521 | G | A | 0.10 | 1.95E-04 | 2.38E-02 | 6.37E-02 |
| rs20002895 | Brain_Substantia_nigra         | 4 | RUFY3        | 71621775 | rs10013848  | 0.8324 | 70816927 | A | T | 0.10 | 1.50E-04 | 2.38E-02 | 6.28E-02 |
| rs20002895 | Brain_Substantia_nigra         | 4 | RUFY3        | 71621775 | rs2637816   | 0.8324 | 70821025 | G | A | 0.10 | 1.77E-04 | 1.12E-02 | 4.61E-02 |
| rs20002895 | Brain_Substantia_nigra         | 4 | RUFY3        | 71621775 | rs2734570   | 0.8324 | 70821713 | A | G | 0.10 | 1.77E-04 | 1.97E-02 | 5.88E-02 |
| rs20002895 | Brain_Substantia_nigra         | 4 | RUFY3        | 71621775 | rs2673720   | 0.8324 | 70825933 | G | A | 0.10 | 1.68E-04 | 2.38E-02 | 6.40E-02 |
| rs20002895 | Brain_Substantia_nigra         | 4 | RUFY3        | 71621775 | rs2247569   | 0.8324 | 70826437 | C | T | 0.10 | 1.68E-04 | 2.38E-02 | 6.40E-02 |
| rs20002895 | Brain_Substantia_nigra         | 4 | RUFY3        | 71621775 | rs186123891 | 0.8324 | 70828593 | A | C | 0.10 | 1.88E-04 | 4.52E-02 | 8.83E-02 |
| rs20002895 | Brain_Substantia_nigra         | 4 | RUFY3        | 71621775 | rs28377851  | 0.8423 | 70831724 | T | A | 0.10 | 3.63E-04 | 2.07E-02 | 6.82E-02 |
| rs20002895 | Brain_Substantia_nigra         | 4 | RUFY3        | 71621775 | rs35772950  | 0.8423 | 70832941 | A | G | 0.10 | 3.63E-04 | 2.07E-02 | 6.82E-02 |
| rs20002895 | Brain_Substantia_nigra         | 4 | RUFY3        | 71621775 | rs28720737  | 0.8423 | 70833223 | G | A | 0.10 | 3.63E-04 | 2.19E-02 | 6.98E-02 |
| rs20002895 | Brain_Substantia_nigra         | 4 | RUFY3        | 71621775 | rs10031238  | 0.8423 | 70833357 | G | T | 0.10 | 3.63E-04 | 2.00E-02 | 6.72E-02 |
| rs20002895 | Brain_Substantia_nigra         | 4 | RUFY3        | 71621775 | rs9994584   | 0.8423 | 70833723 | T | G | 0.10 | 3.63E-04 | 2.11E-02 | 6.88E-02 |
| rs20002895 | Brain_Substantia_nigra         | 4 | RUFY3        | 71621775 | rs10031845  | 0.8423 | 70834238 | C | A | 0.10 | 1.44E-04 | 2.02E-02 | 5.81E-02 |
| rs20002895 | Brain_Substantia_nigra         | 4 | RUFY3        | 71621775 | rs17146478  | 0.8423 | 70834683 | G | T | 0.10 | 3.72E-04 | 2.07E-02 | 6.85E-02 |
| rs20002895 | Brain_Substantia_nigra         | 4 | RUFY3        | 71621775 | rs79406241  | 0.8423 | 70834693 | G | A | 0.10 | 1.44E-04 | 1.97E-02 | 5.74E-02 |
| rs20002895 | Brain_Substantia_nigra         | 4 | RUFY3        | 71621775 | rs17146480  | 0.8423 | 70834740 | G | A | 0.10 | 3.60E-04 | 2.07E-02 | 6.84E-02 |
| rs20002895 | Brain_Substantia_nigra         | 4 | RUFY3        | 71621775 | rs59453376  | 0.8423 | 70834877 | T | C | 0.10 | 3.72E-04 | 2.07E-02 | 6.85E-02 |

|            |                        |   |       |          |             |        |          |   |   |      |          |          |          |
|------------|------------------------|---|-------|----------|-------------|--------|----------|---|---|------|----------|----------|----------|
| rs20002895 | Brain_Substantia_nigra | 4 | RUFY3 | 71621775 | rs10000684  | 0.8423 | 70835403 | T | G | 0.10 | 3.72E-04 | 2.07E-02 | 6.85E-02 |
| rs20002895 | Brain_Substantia_nigra | 4 | RUFY3 | 71621775 | rs10000776  | 0.8423 | 70835520 | C | G | 0.10 | 1.44E-04 | 1.97E-02 | 5.74E-02 |
| rs20002895 | Brain_Substantia_nigra | 4 | RUFY3 | 71621775 | rs28711127  | 0.8423 | 70836136 | T | G | 0.10 | 5.41E-04 | 1.97E-02 | 6.30E-02 |
| rs20002895 | Brain_Substantia_nigra | 4 | RUFY3 | 71621775 | rs28508161  | 0.8423 | 70836565 | C | T | 0.10 | 5.41E-04 | 4.16E-02 | 8.92E-02 |
| rs20002895 | Brain_Substantia_nigra | 4 | RUFY3 | 71621775 | rs28798425  | 0.8423 | 70838306 | G | A | 0.10 | 3.25E-04 | 2.02E-02 | 6.18E-02 |
| rs20002895 | Brain_Substantia_nigra | 4 | RUFY3 | 71621775 | rs4694261   | 0.8423 | 70839766 | T | C | 0.10 | 3.27E-04 | 2.14E-02 | 6.34E-02 |
| rs20002895 | Brain_Substantia_nigra | 4 | RUFY3 | 71621775 | rs4694262   | 0.8423 | 70839850 | A | G | 0.10 | 3.27E-04 | 1.97E-02 | 6.12E-02 |
| rs20002895 | Brain_Substantia_nigra | 4 | RUFY3 | 71621775 | rs7356202   | 0.8423 | 70840436 | T | C | 0.10 | 3.27E-04 | 1.93E-02 | 6.06E-02 |
| rs20002895 | Brain_Substantia_nigra | 4 | RUFY3 | 71621775 | rs77141872  | 0.8423 | 70841126 | T | C | 0.10 | 3.27E-04 | 1.97E-02 | 6.12E-02 |
| rs20002895 | Brain_Substantia_nigra | 4 | RUFY3 | 71621775 | rs12648752  | 0.8423 | 70841254 | C | T | 0.10 | 3.27E-04 | 1.97E-02 | 6.12E-02 |
| rs20002895 | Brain_Substantia_nigra | 4 | RUFY3 | 71621775 | rs28786470  | 0.8423 | 70842730 | T | C | 0.10 | 3.25E-04 | 1.97E-02 | 6.11E-02 |
| rs20002895 | Brain_Substantia_nigra | 4 | RUFY3 | 71621775 | rs17147891  | 0.8423 | 70849978 | T | A | 0.10 | 3.72E-04 | 1.97E-02 | 6.17E-02 |
| rs20002895 | Brain_Substantia_nigra | 4 | RUFY3 | 71621775 | rs1231535   | 0.8743 | 70875649 | T | C | 0.13 | 8.58E-05 | 3.71E-02 | 7.39E-02 |
| rs20002895 | Brain_Substantia_nigra | 4 | UTP3  | 71555231 | rs776837    | 0.8743 | 70876153 | C | T | 0.13 | 6.46E-05 | 4.76E-02 | 8.35E-02 |
| rs20002895 | Brain_Substantia_nigra | 4 | RUFY3 | 71621775 | rs776837    | 0.8743 | 70876153 | C | T | 0.13 | 6.46E-05 | 4.51E-02 | 8.08E-02 |
| rs20002895 | Brain_Substantia_nigra | 4 | RUFY3 | 71621775 | rs1083135   | 0.8843 | 70881127 | C | T | 0.11 | 8.15E-05 | 2.74E-02 | 6.10E-02 |
| rs20002895 | Brain_Substantia_nigra | 4 | RUFY3 | 71621775 | rs79704056  | 0.8843 | 70885815 | G | A | 0.10 | 2.93E-04 | 4.58E-02 | 9.16E-02 |
| rs20002895 | Brain_Substantia_nigra | 4 | RUFY3 | 71621775 | rs776841    | 0.8843 | 70889307 | C | G | 0.11 | 8.15E-05 | 2.74E-02 | 6.10E-02 |
| rs20002895 | Brain_Substantia_nigra | 4 | RUFY3 | 71621775 | rs10017681  | 0.8843 | 70889847 | G | A | 0.10 | 2.67E-04 | 3.54E-02 | 7.92E-02 |
| rs20002895 | Brain_Substantia_nigra | 4 | RUFY3 | 71621775 | rs800756    | 0.8843 | 70897507 | C | T | 0.11 | 8.15E-05 | 2.74E-02 | 6.10E-02 |
| rs20002895 | Brain_Substantia_nigra | 4 | RUFY3 | 71621775 | rs1849937   | 0.8843 | 70898907 | T | C | 0.10 | 2.93E-04 | 4.58E-02 | 9.16E-02 |
| rs20002895 | Brain_Substantia_nigra | 4 | RUFY3 | 71621775 | rs148867082 | 0.9206 | 70903438 | T | C | 0.11 | 3.76E-05 | 3.55E-02 | 6.72E-02 |
| rs20002895 | Brain_Substantia_nigra | 4 | RUFY3 | 71621775 | rs146349142 | 0.9206 | 70903526 | G | A | 0.11 | 3.37E-05 | 3.42E-02 | 6.52E-02 |
| rs20002895 | Brain_Substantia_nigra | 4 | RUFY3 | 71621775 | rs6855909   | 0.9206 | 70904992 | C | A | 0.10 | 5.05E-05 | 2.74E-02 | 5.89E-02 |
| rs20002895 | Brain_Substantia_nigra | 4 | RUFY3 | 71621775 | rs13434441  | 0.9206 | 70905397 | C | T | 0.10 | 1.93E-04 | 4.58E-02 | 8.86E-02 |
| rs20002895 | Brain_Substantia_nigra | 4 | RUFY3 | 71621775 | rs6843256   | 0.9113 | 70906988 | A | G | 0.11 | 4.05E-05 | 3.55E-02 | 6.74E-02 |
| rs20002895 | Brain_Substantia_nigra | 4 | RUFY3 | 71621775 | rs6845010   | 0.9206 | 70907119 | A | C | 0.10 | 3.01E-05 | 2.74E-02 | 5.70E-02 |
| rs20002895 | Brain_Substantia_nigra | 4 | RUFY3 | 71621775 | rs28643541  | 0.9407 | 70912133 | A | G | 0.11 | 7.92E-05 | 3.69E-02 | 7.21E-02 |
| rs20002895 | Brain_Substantia_nigra | 4 | RUFY3 | 71621775 | rs6857697   | 0.9407 | 70914609 | A | C | 0.11 | 6.25E-05 | 3.52E-02 | 6.87E-02 |
| rs20002895 | Brain_Substantia_nigra | 4 | RUFY3 | 71621775 | rs6818370   | 0.9307 | 70921069 | T | G | 0.10 | 2.23E-05 | 3.52E-02 | 6.59E-02 |
| rs20002895 | Brain_Substantia_nigra | 4 | RUFY3 | 71621775 | rs10019826  | 0.9407 | 70922064 | A | G | 0.11 | 4.30E-05 | 3.69E-02 | 7.07E-02 |
| rs20002895 | Brain_Substantia_nigra | 4 | RUFY3 | 71621775 | rs7660022   | 0.9314 | 70943619 | A | C | 0.10 | 2.25E-04 | 4.88E-02 | 9.25E-02 |
| rs20002895 | Brain_Substantia_nigra | 4 | RUFY3 | 71621775 | rs28489946  | 0.9314 | 70952099 | C | T | 0.10 | 2.25E-04 | 4.88E-02 | 9.25E-02 |
| rs20002895 | Brain_Substantia_nigra | 4 | RUFY3 | 71621775 | rs7666225   | 0.9314 | 70959484 | C | T | 0.10 | 2.24E-04 | 4.86E-02 | 9.23E-02 |
| rs20002895 | Brain_Substantia_nigra | 4 | RUFY3 | 71621775 | rs4694041   | 0.9314 | 70961196 | G | C | 0.10 | 2.24E-04 | 4.88E-02 | 9.25E-02 |
| rs20002895 | Brain_Substantia_nigra | 4 | RUFY3 | 71621775 | rs28434698  | 0.9314 | 70965054 | C | T | 0.10 | 2.10E-04 | 4.88E-02 | 9.21E-02 |
| rs20002895 | Brain_Substantia_nigra | 4 | RUFY3 | 71621775 | rs17148162  | 0.9213 | 70974741 | A | C | 0.10 | 4.65E-04 | 3.21E-02 | 7.78E-02 |
| rs20002895 | Brain_Substantia_nigra | 4 | RUFY3 | 71621775 | rs4694043   | 0.9213 | 70975541 | C | G | 0.10 | 4.29E-04 | 3.05E-02 | 7.56E-02 |
| rs20002895 | Brain_Substantia_nigra | 4 | RUFY3 | 71621775 | rs17148181  | 0.9213 | 70981462 | T | C | 0.10 | 3.67E-04 | 2.34E-02 | 6.52E-02 |
| rs20002895 | Brain_Substantia_nigra | 4 | RUFY3 | 71621775 | rs55989074  | 0.9213 | 70982256 | A | T | 0.10 | 2.45E-04 | 3.05E-02 | 7.39E-02 |



|            |                        |   |       |          |            |        |          |   |   |      |          |          |          |
|------------|------------------------|---|-------|----------|------------|--------|----------|---|---|------|----------|----------|----------|
| rs20002895 | Brain_Substantia_nigra | 4 | RUFY3 | 71621775 | s138807640 | 0.9213 | 70984155 | A | G | 0.10 | 2.36E-04 | 3.05E-02 | 7.36E-02 |
| rs20002895 | Brain_Substantia_nigra | 4 | RUFY3 | 71621775 | s116572259 | 0.9213 | 70984463 | C | T | 0.10 | 1.99E-04 | 2.34E-02 | 6.32E-02 |
| rs20002895 | Brain_Substantia_nigra | 4 | RUFY3 | 71621775 | rs10011994 | 0.9021 | 70987026 | A | T | 0.10 | 1.78E-04 | 2.34E-02 | 6.27E-02 |
| rs20002895 | Brain_Substantia_nigra | 4 | RUFY3 | 71621775 | rs28866208 | 0.9021 | 70987317 | G | A | 0.10 | 1.78E-04 | 2.81E-02 | 6.86E-02 |
| rs20002895 | Brain_Substantia_nigra | 4 | RUFY3 | 71621775 | rs7356162  | 0.9021 | 70987982 | G | T | 0.11 | 4.61E-04 | 2.09E-02 | 6.49E-02 |
| rs20002895 | Brain_Substantia_nigra | 4 | RUFY3 | 71621775 | rs28870732 | 0.9021 | 70989432 | A | C | 0.11 | 4.67E-04 | 2.08E-02 | 6.49E-02 |
| rs20002895 | Brain_Substantia_nigra | 4 | RUFY3 | 71621775 | rs28793967 | 0.9021 | 70989703 | T | C | 0.11 | 4.67E-04 | 2.08E-02 | 6.49E-02 |
| rs20002895 | Brain_Substantia_nigra | 4 | RUFY3 | 71621775 | rs1607989  | 0.9021 | 70990224 | G | A | 0.11 | 3.41E-04 | 2.67E-02 | 7.10E-02 |
| rs20002895 | Whole_Blood            | 4 | GRSF1 | 71693580 | rs2029572  | 0.8324 | 70810063 | A | G | 0.10 | 1.75E-04 | 6.89E-03 | 3.76E-02 |
| rs20002895 | Whole_Blood            | 4 | GRSF1 | 71693580 | rs9994880  | 0.8324 | 70811070 | C | T | 0.10 | 1.95E-04 | 7.94E-03 | 3.99E-02 |
| rs20002895 | Whole_Blood            | 4 | GRSF1 | 71693580 | rs9992853  | 0.8324 | 70811521 | G | A | 0.10 | 1.95E-04 | 7.84E-03 | 3.97E-02 |
| rs20002895 | Whole_Blood            | 4 | GRSF1 | 71693580 | rs10013848 | 0.8324 | 70816927 | A | T | 0.10 | 1.50E-04 | 6.05E-03 | 3.53E-02 |
| rs20002895 | Whole_Blood            | 4 | GRSF1 | 71693580 | rs2637816  | 0.8324 | 70821025 | G | A | 0.10 | 1.77E-04 | 1.47E-02 | 5.17E-02 |
| rs20002895 | Whole_Blood            | 4 | GRSF1 | 71693580 | rs2734570  | 0.8324 | 70821713 | A | G | 0.10 | 1.77E-04 | 4.43E-03 | 3.28E-02 |
| rs20002895 | Whole_Blood            | 4 | GRSF1 | 71693580 | rs2673720  | 0.8324 | 70825933 | G | A | 0.10 | 1.68E-04 | 6.41E-03 | 3.72E-02 |
| rs20002895 | Whole_Blood            | 4 | GRSF1 | 71693580 | rs2247569  | 0.8324 | 70826437 | C | T | 0.10 | 1.68E-04 | 3.26E-03 | 2.96E-02 |
| rs20002895 | Whole_Blood            | 4 | GRSF1 | 71693580 | s186123891 | 0.8324 | 70828593 | A | C | 0.10 | 1.88E-04 | 7.53E-03 | 3.91E-02 |
| rs20002895 | Whole_Blood            | 4 | GRSF1 | 71693580 | rs28377851 | 0.8423 | 70831724 | T | A | 0.10 | 3.63E-04 | 1.61E-02 | 6.17E-02 |
| rs20002895 | Whole_Blood            | 4 | GRSF1 | 71693580 | rs35772950 | 0.8423 | 70832941 | A | G | 0.10 | 3.63E-04 | 7.54E-03 | 4.72E-02 |
| rs20002895 | Whole_Blood            | 4 | GRSF1 | 71693580 | rs28720737 | 0.8423 | 70833223 | G | A | 0.10 | 3.63E-04 | 9.60E-03 | 5.12E-02 |
| rs20002895 | Whole_Blood            | 4 | GRSF1 | 71693580 | rs10031238 | 0.8423 | 70833357 | G | T | 0.10 | 3.63E-04 | 9.01E-03 | 5.01E-02 |
| rs20002895 | Whole_Blood            | 4 | GRSF1 | 71693580 | rs9994584  | 0.8423 | 70833723 | T | G | 0.10 | 3.63E-04 | 8.25E-03 | 4.86E-02 |
| rs20002895 | Whole_Blood            | 4 | GRSF1 | 71693580 | rs10031845 | 0.8423 | 70834238 | C | A | 0.10 | 1.44E-04 | 5.66E-03 | 3.45E-02 |
| rs20002895 | Whole_Blood            | 4 | GRSF1 | 71693580 | rs17146478 | 0.8423 | 70834683 | G | T | 0.10 | 3.72E-04 | 1.04E-02 | 5.29E-02 |
| rs20002895 | Whole_Blood            | 4 | GRSF1 | 71693580 | rs79406241 | 0.8423 | 70834693 | G | A | 0.10 | 1.44E-04 | 7.42E-03 | 3.81E-02 |
| rs20002895 | Whole_Blood            | 4 | GRSF1 | 71693580 | rs17146480 | 0.8423 | 70834740 | G | A | 0.10 | 3.60E-04 | 9.84E-03 | 5.18E-02 |
| rs20002895 | Whole_Blood            | 4 | GRSF1 | 71693580 | rs59453376 | 0.8423 | 70834877 | T | C | 0.10 | 3.72E-04 | 1.24E-02 | 5.63E-02 |
| rs20002895 | Whole_Blood            | 4 | GRSF1 | 71693580 | rs10000684 | 0.8423 | 70835403 | T | G | 0.10 | 3.72E-04 | 8.25E-03 | 4.89E-02 |
| rs20002895 | Whole_Blood            | 4 | GRSF1 | 71693580 | rs10000776 | 0.8423 | 70835520 | C | G | 0.10 | 1.44E-04 | 5.91E-03 | 3.50E-02 |
| rs20002895 | Whole_Blood            | 4 | GRSF1 | 71693580 | rs28711127 | 0.8423 | 70836136 | T | G | 0.10 | 5.41E-04 | 5.82E-03 | 3.99E-02 |
| rs20002895 | Whole_Blood            | 4 | GRSF1 | 71693580 | rs28508161 | 0.8423 | 70836565 | C | T | 0.10 | 5.41E-04 | 1.13E-02 | 5.04E-02 |
| rs20002895 | Whole_Blood            | 4 | GRSF1 | 71693580 | rs28798425 | 0.8423 | 70838306 | G | A | 0.10 | 3.25E-04 | 6.26E-03 | 3.91E-02 |
| rs20002895 | Whole_Blood            | 4 | GRSF1 | 71693580 | rs4694261  | 0.8423 | 70839766 | T | C | 0.10 | 3.27E-04 | 5.40E-03 | 3.73E-02 |
| rs20002895 | Whole_Blood            | 4 | GRSF1 | 71693580 | rs4694262  | 0.8423 | 70839850 | A | G | 0.10 | 3.27E-04 | 5.82E-03 | 3.82E-02 |
| rs20002895 | Whole_Blood            | 4 | GRSF1 | 71693580 | rs7356202  | 0.8423 | 70840436 | T | C | 0.10 | 3.27E-04 | 1.09E-02 | 4.80E-02 |
| rs20002895 | Whole_Blood            | 4 | GRSF1 | 71693580 | rs77141872 | 0.8423 | 70841126 | T | C | 0.10 | 3.27E-04 | 5.82E-03 | 3.82E-02 |
| rs20002895 | Whole_Blood            | 4 | GRSF1 | 71693580 | rs12648752 | 0.8423 | 70841254 | C | T | 0.10 | 3.27E-04 | 5.82E-03 | 3.82E-02 |
| rs20002895 | Whole_Blood            | 4 | GRSF1 | 71693580 | rs28786470 | 0.8423 | 70842730 | T | C | 0.10 | 3.25E-04 | 1.32E-02 | 5.16E-02 |
| rs20002895 | Whole_Blood            | 4 | GRSF1 | 71693580 | rs17147891 | 0.8423 | 70849978 | T | A | 0.10 | 3.72E-04 | 5.82E-03 | 3.87E-02 |
| rs20002895 | Whole_Blood            | 4 | GRSF1 | 71693580 | rs28661681 | 0.8843 | 70854978 | T | C | 0.10 | 3.80E-04 | 3.59E-03 | 3.22E-02 |

|            |             |   |       |          |             |        |          |   |   |      |          |          |          |
|------------|-------------|---|-------|----------|-------------|--------|----------|---|---|------|----------|----------|----------|
| rs20002895 | Whole_Blood | 4 | GRSF1 | 71693580 | rs4694263   | 0.8843 | 70862927 | C | T | 0.10 | 2.79E-04 | 3.59E-03 | 3.19E-02 |
| rs20002895 | Whole_Blood | 4 | GRSF1 | 71693580 | rs3775764   | 0.8843 | 70864065 | A | G | 0.10 | 2.79E-04 | 3.59E-03 | 3.19E-02 |
| rs20002895 | Whole_Blood | 4 | GRSF1 | 71693580 | rs1231535   | 0.8743 | 70875649 | T | C | 0.13 | 8.58E-05 | 1.42E-02 | 4.52E-02 |
| rs20002895 | Whole_Blood | 4 | GRSF1 | 71693580 | rs776837    | 0.8743 | 70876153 | C | T | 0.13 | 6.46E-05 | 3.14E-02 | 6.57E-02 |
| rs20002895 | Whole_Blood | 4 | GRSF1 | 71693580 | rs1606878   | 0.8843 | 70876844 | A | T | 0.10 | 2.79E-04 | 3.87E-03 | 3.27E-02 |
| rs20002895 | Whole_Blood | 4 | GRSF1 | 71693580 | rs28799286  | 0.8843 | 70878782 | T | C | 0.10 | 2.79E-04 | 4.62E-03 | 3.46E-02 |
| rs20002895 | Whole_Blood | 4 | GRSF1 | 71693580 | rs1083135   | 0.8843 | 70881127 | C | T | 0.11 | 8.15E-05 | 1.64E-02 | 4.67E-02 |
| rs20002895 | Whole_Blood | 4 | GRSF1 | 71693580 | rs79704056  | 0.8843 | 70885815 | G | A | 0.10 | 2.93E-04 | 3.40E-03 | 3.19E-02 |
| rs20002895 | Whole_Blood | 4 | GRSF1 | 71693580 | rs776841    | 0.8843 | 70889307 | C | G | 0.11 | 8.15E-05 | 7.16E-03 | 3.20E-02 |
| rs20002895 | Whole_Blood | 4 | GRSF1 | 71693580 | rs10017681  | 0.8843 | 70889847 | G | A | 0.10 | 2.67E-04 | 4.71E-03 | 3.45E-02 |
| rs20002895 | Whole_Blood | 4 | GRSF1 | 71693580 | rs800756    | 0.8843 | 70897507 | C | T | 0.11 | 8.15E-05 | 6.69E-03 | 3.11E-02 |
| rs20002895 | Whole_Blood | 4 | GRSF1 | 71693580 | rs1849937   | 0.8843 | 70898907 | T | C | 0.10 | 2.93E-04 | 4.26E-03 | 3.42E-02 |
| rs20002895 | Whole_Blood | 4 | GRSF1 | 71693580 | rs28707754  | 0.8843 | 70900864 | T | C | 0.10 | 2.67E-04 | 3.59E-03 | 3.16E-02 |
| rs20002895 | Whole_Blood | 4 | GRSF1 | 71693580 | rs4694040   | 0.8843 | 70901653 | A | G | 0.10 | 2.67E-04 | 3.44E-03 | 3.12E-02 |
| rs20002895 | Whole_Blood | 4 | GRSF1 | 71693580 | rs7654757   | 0.8843 | 70902412 | T | C | 0.10 | 2.67E-04 | 3.59E-03 | 3.16E-02 |
| rs20002895 | Whole_Blood | 4 | GRSF1 | 71693580 | rs148867082 | 0.9206 | 70903438 | T | C | 0.11 | 3.76E-05 | 3.77E-02 | 6.97E-02 |
| rs20002895 | Whole_Blood | 4 | GRSF1 | 71693580 | rs146349142 | 0.9206 | 70903526 | G | A | 0.11 | 3.37E-05 | 3.85E-02 | 7.00E-02 |
| rs20002895 | Whole_Blood | 4 | GRSF1 | 71693580 | rs6855909   | 0.9206 | 70904992 | C | A | 0.10 | 5.05E-05 | 2.35E-02 | 5.41E-02 |
| rs20002895 | Whole_Blood | 4 | MOB1B | 71810964 | rs6855909   | 0.9206 | 70904992 | C | A | 0.10 | 5.05E-05 | 3.13E-02 | 6.34E-02 |
| rs20002895 | Whole_Blood | 4 | GRSF1 | 71693580 | rs13434441  | 0.9206 | 70905397 | C | T | 0.10 | 1.93E-04 | 5.23E-03 | 3.39E-02 |
| rs20002895 | Whole_Blood | 4 | MOB1B | 71810964 | rs13434441  | 0.9206 | 70905397 | C | T | 0.10 | 1.93E-04 | 4.08E-02 | 8.31E-02 |
| rs20002895 | Whole_Blood | 4 | GRSF1 | 71693580 | rs6843256   | 0.9113 | 70906988 | A | G | 0.11 | 4.05E-05 | 3.21E-02 | 6.36E-02 |
| rs20002895 | Whole_Blood | 4 | GRSF1 | 71693580 | rs6845010   | 0.9206 | 70907119 | A | C | 0.10 | 3.01E-05 | 2.35E-02 | 5.23E-02 |
| rs20002895 | Whole_Blood | 4 | MOB1B | 71810964 | rs6845010   | 0.9206 | 70907119 | A | C | 0.10 | 3.01E-05 | 3.13E-02 | 6.15E-02 |
| rs20002895 | Whole_Blood | 4 | GRSF1 | 71693580 | rs28643541  | 0.9407 | 70912133 | A | G | 0.11 | 7.92E-05 | 4.80E-02 | 8.42E-02 |
| rs20002895 | Whole_Blood | 4 | MOB1B | 71810964 | rs28643541  | 0.9407 | 70912133 | A | G | 0.11 | 7.92E-05 | 4.59E-02 | 8.20E-02 |
| rs20002895 | Whole_Blood | 4 | GRSF1 | 71693580 | rs6857697   | 0.9407 | 70914609 | A | C | 0.11 | 6.25E-05 | 2.55E-02 | 5.73E-02 |
| rs20002895 | Whole_Blood | 4 | MOB1B | 71810964 | rs6857697   | 0.9407 | 70914609 | A | C | 0.11 | 6.25E-05 | 3.14E-02 | 6.44E-02 |
| rs20002895 | Whole_Blood | 4 | GRSF1 | 71693580 | rs3862054   | 0.9407 | 70916273 | T | C | 0.10 | 1.52E-04 | 4.05E-03 | 3.01E-02 |
| rs20002895 | Whole_Blood | 4 | GRSF1 | 71693580 | rs6818370   | 0.9307 | 70921069 | T | G | 0.10 | 2.23E-05 | 1.37E-02 | 3.89E-02 |
| rs20002895 | Whole_Blood | 4 | MOB1B | 71810964 | rs6818370   | 0.9307 | 70921069 | T | G | 0.10 | 2.23E-05 | 4.17E-02 | 7.30E-02 |
| rs20002895 | Whole_Blood | 4 | GRSF1 | 71693580 | rs10019826  | 0.9407 | 70922064 | A | G | 0.11 | 4.30E-05 | 4.39E-02 | 7.83E-02 |
| rs20002895 | Whole_Blood | 4 | MOB1B | 71810964 | rs10019826  | 0.9407 | 70922064 | A | G | 0.11 | 4.30E-05 | 3.21E-02 | 6.52E-02 |
| rs20002895 | Whole_Blood | 4 | GRSF1 | 71693580 | rs28869909  | 0.9407 | 70922226 | C | A | 0.10 | 1.09E-04 | 1.01E-02 | 4.12E-02 |
| rs20002895 | Whole_Blood | 4 | GRSF1 | 71693580 | rs115749891 | 1.0000 | 70923658 | A | G | 0.10 | 8.26E-05 | 6.40E-03 | 3.64E-02 |
| rs20002895 | Whole_Blood | 4 | GRSF1 | 71693580 | rs200028958 | 1.0000 | 70923661 | A | G | 0.10 | 6.25E-06 | 6.40E-03 | 2.29E-02 |
| rs20002895 | Whole_Blood | 4 | GRSF1 | 71693580 | rs201171800 | 1.0000 | 70923663 | A | G | 0.10 | 6.25E-06 | 6.40E-03 | 2.29E-02 |
| rs20002895 | Whole_Blood | 4 | GRSF1 | 71693580 | rs202245754 | 1.0000 | 70923665 | C | A | 0.10 | 6.25E-06 | 6.40E-03 | 2.29E-02 |
| rs20002895 | Whole_Blood | 4 | GRSF1 | 71693580 | rs200349247 | 1.0000 | 70923666 | A | T | 0.10 | 6.25E-06 | 6.40E-03 | 2.29E-02 |
| rs20002895 | Whole_Blood | 4 | GRSF1 | 71693580 | rs28790602  | 0.9407 | 70928040 | A | G | 0.10 | 1.10E-04 | 6.40E-03 | 3.44E-02 |

|            |                |    |                      |          |             |        |          |   |   |      |          |          |          |
|------------|----------------|----|----------------------|----------|-------------|--------|----------|---|---|------|----------|----------|----------|
| rs20002895 | Whole_Blood    | 4  | <i>GRSF1</i>         | 71693580 | rs4694265   | 0.9407 | 70928571 | A | G | 0.10 | 1.10E-04 | 6.40E-03 | 3.44E-02 |
| rs20002895 | Whole_Blood    | 4  | <i>GRSF1</i>         | 71693580 | rs28635879  | 0.9407 | 70929763 | T | C | 0.10 | 1.22E-04 | 6.02E-03 | 3.44E-02 |
| rs20002895 | Whole_Blood    | 4  | <i>MOB1B</i>         | 71810964 | rs28635879  | 0.9407 | 70929763 | T | C | 0.10 | 1.22E-04 | 4.12E-02 | 8.21E-02 |
| rs20002895 | Whole_Blood    | 4  | <i>GRSF1</i>         | 71693580 | rs28622022  | 0.9407 | 70929889 | T | A | 0.10 | 1.12E-04 | 6.05E-03 | 3.38E-02 |
| rs20002895 | Whole_Blood    | 4  | <i>MOB1B</i>         | 71810964 | rs28622022  | 0.9407 | 70929889 | T | A | 0.10 | 1.12E-04 | 4.01E-02 | 8.02E-02 |
| rs20002895 | Whole_Blood    | 4  | <i>GRSF1</i>         | 71693580 | rs6832546   | 0.9407 | 70930584 | T | G | 0.10 | 1.22E-04 | 6.02E-03 | 3.44E-02 |
| rs20002895 | Whole_Blood    | 4  | <i>MOB1B</i>         | 71810964 | rs6832546   | 0.9407 | 70930584 | T | G | 0.10 | 1.22E-04 | 4.12E-02 | 8.21E-02 |
| rs20002895 | Whole_Blood    | 4  | <i>GRSF1</i>         | 71693580 | rs17148034  | 0.9122 | 70937524 | G | C | 0.10 | 2.93E-04 | 1.42E-02 | 5.09E-02 |
| rs20002895 | Whole_Blood    | 4  | <i>GRSF1</i>         | 71693580 | rs7660022   | 0.9314 | 70943619 | A | C | 0.10 | 2.25E-04 | 4.09E-03 | 3.19E-02 |
| rs20002895 | Whole_Blood    | 4  | <i>GRSF1</i>         | 71693580 | rs10004471  | 0.9314 | 70950312 | C | A | 0.10 | 2.25E-04 | 3.32E-03 | 2.98E-02 |
| rs20002895 | Whole_Blood    | 4  | <i>GRSF1</i>         | 71693580 | rs28489946  | 0.9314 | 70952099 | C | T | 0.10 | 2.25E-04 | 4.09E-03 | 3.19E-02 |
| rs20002895 | Whole_Blood    | 4  | <i>GRSF1</i>         | 71693580 | rs7666225   | 0.9314 | 70959484 | C | T | 0.10 | 2.24E-04 | 3.12E-03 | 2.92E-02 |
| rs20002895 | Whole_Blood    | 4  | <i>MOB1B</i>         | 71810964 | rs7666225   | 0.9314 | 70959484 | C | T | 0.10 | 2.24E-04 | 4.74E-02 | 9.10E-02 |
| rs20002895 | Whole_Blood    | 4  | <i>GRSF1</i>         | 71693580 | rs4694041   | 0.9314 | 70961196 | G | C | 0.10 | 2.24E-04 | 1.07E-02 | 4.51E-02 |
| rs20002895 | Whole_Blood    | 4  | <i>GRSF1</i>         | 71693580 | rs28434698  | 0.9314 | 70965054 | C | T | 0.10 | 2.10E-04 | 4.49E-03 | 3.25E-02 |
| rs20002895 | Whole_Blood    | 4  | <i>GRSF1</i>         | 71693580 | rs12331580  | 0.9314 | 70973499 | A | C | 0.10 | 2.87E-04 | 1.51E-02 | 5.29E-02 |
| rs20002895 | Whole_Blood    | 4  | <i>GRSF1</i>         | 71693580 | rs17148162  | 0.9213 | 70974741 | A | C | 0.10 | 4.65E-04 | 1.07E-02 | 4.86E-02 |
| rs20002895 | Whole_Blood    | 4  | <i>GRSF1</i>         | 71693580 | rs4694043   | 0.9213 | 70975541 | C | G | 0.10 | 4.29E-04 | 2.53E-02 | 6.92E-02 |
| rs20002895 | Whole_Blood    | 4  | <i>GRSF1</i>         | 71693580 | rs28645990  | 0.9213 | 70977161 | G | T | 0.10 | 4.29E-04 | 4.10E-03 | 3.48E-02 |
| rs20002895 | Whole_Blood    | 4  | <i>GRSF1</i>         | 71693580 | rs17148181  | 0.9213 | 70981462 | T | C | 0.10 | 3.67E-04 | 7.79E-03 | 4.16E-02 |
| rs20002895 | Whole_Blood    | 4  | <i>GRSF1</i>         | 71693580 | rs17148184  | 0.9213 | 70981602 | T | A | 0.10 | 4.29E-04 | 5.22E-03 | 3.75E-02 |
| rs20002895 | Whole_Blood    | 4  | <i>GRSF1</i>         | 71693580 | rs55989074  | 0.9213 | 70982256 | A | T | 0.10 | 2.45E-04 | 5.49E-03 | 3.67E-02 |
| rs20002895 | Whole_Blood    | 4  | <i>GRSF1</i>         | 71693580 | rs138807640 | 0.9213 | 70984155 | A | G | 0.10 | 2.36E-04 | 6.45E-03 | 3.85E-02 |
| rs20002895 | Whole_Blood    | 4  | <i>GRSF1</i>         | 71693580 | rs116572259 | 0.9213 | 70984463 | C | T | 0.10 | 1.99E-04 | 3.01E-03 | 2.87E-02 |
| rs20002895 | Whole_Blood    | 4  | <i>GRSF1</i>         | 71693580 | rs10011994  | 0.9021 | 70987026 | A | T | 0.10 | 1.78E-04 | 3.01E-03 | 2.82E-02 |
| rs20002895 | Whole_Blood    | 4  | <i>GRSF1</i>         | 71693580 | rs28866208  | 0.9021 | 70987317 | G | A | 0.10 | 1.78E-04 | 6.87E-03 | 3.74E-02 |
| rs20002895 | Whole_Blood    | 4  | <i>GRSF1</i>         | 71693580 | rs7356162   | 0.9021 | 70987982 | G | T | 0.11 | 4.61E-04 | 1.97E-03 | 2.93E-02 |
| rs20002895 | Whole_Blood    | 4  | <i>GRSF1</i>         | 71693580 | rs28870732  | 0.9021 | 70989432 | A | C | 0.11 | 4.67E-04 | 5.94E-03 | 4.06E-02 |
| rs20002895 | Whole_Blood    | 4  | <i>GRSF1</i>         | 71693580 | rs28793967  | 0.9021 | 70989703 | T | C | 0.11 | 4.67E-04 | 2.28E-03 | 3.05E-02 |
| rs20002895 | Whole_Blood    | 4  | <i>GRSF1</i>         | 71693580 | rs1607989   | 0.9021 | 70990224 | G | A | 0.11 | 3.41E-04 | 8.24E-03 | 4.39E-02 |
| rs20002895 | Whole_Blood    | 4  | <i>GRSF1</i>         | 71693580 | rs10007698  | 0.9021 | 70990879 | C | T | 0.10 | 1.26E-04 | 4.85E-02 | 9.01E-02 |
| rs4526799  | Brain_Amygdala | 12 | <i>RPS26</i>         | 56436876 | rs9919772   | 0.8450 | 57260027 | T | C | 0.33 | 1.03E-02 | 5.52E-03 | 1.89E-01 |
| rs4526799  | Brain_Amygdala | 12 | <i>RP11-603J24.5</i> | 56518610 | rs9919772   | 0.8450 | 57260027 | T | C | 0.33 | 1.03E-02 | 3.85E-02 | 2.27E-01 |
| rs4526799  | Brain_Amygdala | 12 | <i>ATP5B</i>         | 57035878 | rs9919772   | 0.8450 | 57260027 | T | C | 0.33 | 1.03E-02 | 7.55E-03 | 1.93E-01 |
| rs4526799  | Brain_Amygdala | 12 | <i>PRIM1</i>         | 57135785 | rs9919772   | 0.8450 | 57260027 | T | C | 0.33 | 1.03E-02 | 1.68E-03 | 1.78E-01 |
| rs4526799  | Brain_Amygdala | 12 | <i>TMEM194A</i>      | 57465636 | rs9919772   | 0.8450 | 57260027 | T | C | 0.33 | 1.03E-02 | 1.11E-02 | 1.99E-01 |
| rs4526799  | Brain_Amygdala | 12 | <i>AC025165.8</i>    | 58008874 | rs9919772   | 0.8450 | 57260027 | T | C | 0.33 | 1.03E-02 | 3.20E-02 | 2.21E-01 |
| rs4526799  | Brain_Amygdala | 12 | <i>RP11-571M6.8</i>  | 58118261 | rs9919772   | 0.8450 | 57260027 | T | C | 0.33 | 1.03E-02 | 3.58E-02 | 2.24E-01 |
| rs4526799  | Brain_Amygdala | 12 | <i>AVIL</i>          | 58201929 | rs9919772   | 0.8450 | 57260027 | T | C | 0.33 | 1.03E-02 | 7.42E-03 | 1.93E-01 |
| rs4526799  | Brain_Amygdala | 12 | <i>RPS26</i>         | 56436876 | rs4495925   | 0.8650 | 57268116 | C | G | 0.33 | 1.04E-02 | 3.19E-03 | 1.80E-01 |

|           |                |    |                      |          |            |        |          |   |   |      |          |          |          |
|-----------|----------------|----|----------------------|----------|------------|--------|----------|---|---|------|----------|----------|----------|
| rs4526799 | Brain_Amygdala | 12 | <i>RP11-603J24.5</i> | 56518610 | rs4495925  | 0.8650 | 57268116 | C | G | 0.33 | 1.04E-02 | 4.37E-02 | 2.28E-01 |
| rs4526799 | Brain_Amygdala | 12 | <i>ATP5B</i>         | 57035878 | rs4495925  | 0.8650 | 57268116 | C | G | 0.33 | 1.04E-02 | 1.12E-02 | 1.96E-01 |
| rs4526799 | Brain_Amygdala | 12 | <i>PRIM1</i>         | 57135785 | rs4495925  | 0.8650 | 57268116 | C | G | 0.33 | 1.04E-02 | 1.39E-03 | 1.74E-01 |
| rs4526799 | Brain_Amygdala | 12 | <i>TMEM194A</i>      | 57465636 | rs4495925  | 0.8650 | 57268116 | C | G | 0.33 | 1.04E-02 | 7.65E-03 | 1.90E-01 |
| rs4526799 | Brain_Amygdala | 12 | <i>R3HDM2</i>        | 57736167 | rs4495925  | 0.8650 | 57268116 | C | G | 0.33 | 1.04E-02 | 2.75E-02 | 2.14E-01 |
| rs4526799 | Brain_Amygdala | 12 | <i>AC025165.8</i>    | 58008874 | rs4495925  | 0.8650 | 57268116 | C | G | 0.33 | 1.04E-02 | 4.49E-02 | 2.29E-01 |
| rs4526799 | Brain_Amygdala | 12 | <i>AVIL</i>          | 58201929 | rs4495925  | 0.8650 | 57268116 | C | G | 0.33 | 1.04E-02 | 9.66E-03 | 1.94E-01 |
| rs4526799 | Brain_Amygdala | 12 | <i>RPS26</i>         | 56436876 | rs4471472  | 0.8650 | 57268985 | A | G | 0.32 | 9.99E-03 | 3.70E-03 | 1.78E-01 |
| rs4526799 | Brain_Amygdala | 12 | <i>RP11-603J24.5</i> | 56518610 | rs4471472  | 0.8650 | 57268985 | A | G | 0.32 | 9.99E-03 | 3.30E-02 | 2.15E-01 |
| rs4526799 | Brain_Amygdala | 12 | <i>ATP5B</i>         | 57035878 | rs4471472  | 0.8650 | 57268985 | A | G | 0.32 | 9.99E-03 | 8.81E-03 | 1.88E-01 |
| rs4526799 | Brain_Amygdala | 12 | <i>PRIM1</i>         | 57135785 | rs4471472  | 0.8650 | 57268985 | A | G | 0.32 | 9.99E-03 | 1.40E-03 | 1.69E-01 |
| rs4526799 | Brain_Amygdala | 12 | <i>TMEM194A</i>      | 57465636 | rs4471472  | 0.8650 | 57268985 | A | G | 0.32 | 9.99E-03 | 7.69E-03 | 1.86E-01 |
| rs4526799 | Brain_Amygdala | 12 | <i>R3HDM2</i>        | 57736167 | rs4471472  | 0.8650 | 57268985 | A | G | 0.32 | 9.99E-03 | 3.47E-02 | 2.17E-01 |
| rs4526799 | Brain_Amygdala | 12 | <i>AC025165.8</i>    | 58008874 | rs4471472  | 0.8650 | 57268985 | A | G | 0.32 | 9.99E-03 | 3.21E-02 | 2.15E-01 |
| rs4526799 | Brain_Amygdala | 12 | <i>AVIL</i>          | 58201929 | rs4471472  | 0.8650 | 57268985 | A | G | 0.32 | 9.99E-03 | 7.32E-03 | 1.86E-01 |
| rs4526799 | Brain_Amygdala | 12 | <i>RPS26</i>         | 56436876 | rs4633499  | 0.8610 | 57269264 | A | T | 0.32 | 1.43E-02 | 1.64E-03 | 2.10E-01 |
| rs4526799 | Brain_Amygdala | 12 | <i>RP11-603J24.5</i> | 56518610 | rs4633499  | 0.8610 | 57269264 | A | T | 0.32 | 1.43E-02 | 2.87E-02 | 2.46E-01 |
| rs4526799 | Brain_Amygdala | 12 | <i>ATP5B</i>         | 57035878 | rs4633499  | 0.8610 | 57269264 | A | T | 0.32 | 1.43E-02 | 9.93E-03 | 2.27E-01 |
| rs4526799 | Brain_Amygdala | 12 | <i>PRIM1</i>         | 57135785 | rs4633499  | 0.8610 | 57269264 | A | T | 0.32 | 1.43E-02 | 2.64E-03 | 2.13E-01 |
| rs4526799 | Brain_Amygdala | 12 | <i>TMEM194A</i>      | 57465636 | rs4633499  | 0.8610 | 57269264 | A | T | 0.32 | 1.43E-02 | 4.00E-03 | 2.17E-01 |
| rs4526799 | Brain_Amygdala | 12 | <i>AC025165.8</i>    | 58008874 | rs4633499  | 0.8610 | 57269264 | A | T | 0.32 | 1.43E-02 | 3.15E-02 | 2.48E-01 |
| rs4526799 | Brain_Amygdala | 12 | <i>AVIL</i>          | 58201929 | rs4633499  | 0.8610 | 57269264 | A | T | 0.32 | 1.43E-02 | 7.73E-03 | 2.24E-01 |
| rs4526799 | Brain_Amygdala | 12 | <i>ERBB3</i>         | 56485465 | rs12300079 | 0.9956 | 57273194 | T | C | 0.36 | 3.73E-03 | 3.43E-02 | 1.69E-01 |
| rs4526799 | Brain_Amygdala | 12 | <i>ATP5B</i>         | 57035878 | rs12300079 | 0.9956 | 57273194 | T | C | 0.36 | 3.73E-03 | 1.95E-02 | 1.53E-01 |
| rs4526799 | Brain_Amygdala | 12 | <i>PRIM1</i>         | 57135785 | rs12300079 | 0.9956 | 57273194 | T | C | 0.36 | 3.73E-03 | 4.71E-03 | 1.27E-01 |
| rs4526799 | Brain_Amygdala | 12 | <i>AC025165.8</i>    | 58008874 | rs12300079 | 0.9956 | 57273194 | T | C | 0.36 | 3.73E-03 | 2.87E-02 | 1.63E-01 |
| rs4526799 | Brain_Amygdala | 12 | <i>TSPAN31</i>       | 58138756 | rs12300079 | 0.9956 | 57273194 | T | C | 0.36 | 3.73E-03 | 4.57E-02 | 1.80E-01 |
| rs4526799 | Brain_Amygdala | 12 | <i>AVIL</i>          | 58201929 | rs12300079 | 0.9956 | 57273194 | T | C | 0.36 | 3.73E-03 | 2.48E-03 | 1.20E-01 |
| rs4526799 | Brain_Amygdala | 12 | <i>ERBB3</i>         | 56485465 | rs12300191 | 0.9956 | 57273289 | A | G | 0.36 | 3.59E-03 | 3.43E-02 | 1.67E-01 |
| rs4526799 | Brain_Amygdala | 12 | <i>ATP5B</i>         | 57035878 | rs12300191 | 0.9956 | 57273289 | A | G | 0.36 | 3.59E-03 | 1.95E-02 | 1.50E-01 |
| rs4526799 | Brain_Amygdala | 12 | <i>PRIM1</i>         | 57135785 | rs12300191 | 0.9956 | 57273289 | A | G | 0.36 | 3.59E-03 | 4.71E-03 | 1.25E-01 |
| rs4526799 | Brain_Amygdala | 12 | <i>AC025165.8</i>    | 58008874 | rs12300191 | 0.9956 | 57273289 | A | G | 0.36 | 3.59E-03 | 2.87E-02 | 1.61E-01 |
| rs4526799 | Brain_Amygdala | 12 | <i>TSPAN31</i>       | 58138756 | rs12300191 | 0.9956 | 57273289 | A | G | 0.36 | 3.59E-03 | 4.57E-02 | 1.78E-01 |
| rs4526799 | Brain_Amygdala | 12 | <i>AVIL</i>          | 58201929 | rs12300191 | 0.9956 | 57273289 | A | G | 0.36 | 3.59E-03 | 2.48E-03 | 1.18E-01 |
| rs4526799 | Brain_Amygdala | 12 | <i>ERBB3</i>         | 56485465 | rs4514464  | 0.9956 | 57276375 | C | T | 0.36 | 2.92E-03 | 3.43E-02 | 1.64E-01 |
| rs4526799 | Brain_Amygdala | 12 | <i>ATP5B</i>         | 57035878 | rs4514464  | 0.9956 | 57276375 | C | T | 0.36 | 2.92E-03 | 1.95E-02 | 1.47E-01 |
| rs4526799 | Brain_Amygdala | 12 | <i>PRIM1</i>         | 57135785 | rs4514464  | 0.9956 | 57276375 | C | T | 0.36 | 2.92E-03 | 4.71E-03 | 1.22E-01 |
| rs4526799 | Brain_Amygdala | 12 | <i>AC025165.8</i>    | 58008874 | rs4514464  | 0.9956 | 57276375 | C | T | 0.36 | 2.92E-03 | 2.87E-02 | 1.58E-01 |
| rs4526799 | Brain_Amygdala | 12 | <i>TSPAN31</i>       | 58138756 | rs4514464  | 0.9956 | 57276375 | C | T | 0.36 | 2.92E-03 | 4.57E-02 | 1.75E-01 |
| rs4526799 | Brain_Amygdala | 12 | <i>AVIL</i>          | 58201929 | rs4514464  | 0.9956 | 57276375 | C | T | 0.36 | 2.92E-03 | 2.48E-03 | 1.14E-01 |

|           |                |    |                   |          |            |        |          |   |   |      |          |          |          |
|-----------|----------------|----|-------------------|----------|------------|--------|----------|---|---|------|----------|----------|----------|
| rs4526799 | Brain_Amygdala | 12 | <i>ERBB3</i>      | 56485465 | rs4417325  | 0.9956 | 57277302 | G | A | 0.36 | 3.59E-03 | 3.43E-02 | 1.67E-01 |
| rs4526799 | Brain_Amygdala | 12 | <i>ATP5B</i>      | 57035878 | rs4417325  | 0.9956 | 57277302 | G | A | 0.36 | 3.59E-03 | 1.95E-02 | 1.50E-01 |
| rs4526799 | Brain_Amygdala | 12 | <i>PRIM1</i>      | 57135785 | rs4417325  | 0.9956 | 57277302 | G | A | 0.36 | 3.59E-03 | 4.71E-03 | 1.25E-01 |
| rs4526799 | Brain_Amygdala | 12 | <i>AC025165.8</i> | 58008874 | rs4417325  | 0.9956 | 57277302 | G | A | 0.36 | 3.59E-03 | 2.87E-02 | 1.61E-01 |
| rs4526799 | Brain_Amygdala | 12 | <i>TSPAN31</i>    | 58138756 | rs4417325  | 0.9956 | 57277302 | G | A | 0.36 | 3.59E-03 | 4.57E-02 | 1.78E-01 |
| rs4526799 | Brain_Amygdala | 12 | <i>AVIL</i>       | 58201929 | rs4417325  | 0.9956 | 57277302 | G | A | 0.36 | 3.59E-03 | 2.48E-03 | 1.18E-01 |
| rs4526799 | Brain_Amygdala | 12 | <i>ERBB3</i>      | 56485465 | rs11172030 | 0.9956 | 57278076 | A | C | 0.36 | 3.63E-03 | 3.43E-02 | 1.67E-01 |
| rs4526799 | Brain_Amygdala | 12 | <i>ATP5B</i>      | 57035878 | rs11172030 | 0.9956 | 57278076 | A | C | 0.36 | 3.63E-03 | 1.95E-02 | 1.51E-01 |
| rs4526799 | Brain_Amygdala | 12 | <i>PRIM1</i>      | 57135785 | rs11172030 | 0.9956 | 57278076 | A | C | 0.36 | 3.63E-03 | 4.71E-03 | 1.26E-01 |
| rs4526799 | Brain_Amygdala | 12 | <i>AC025165.8</i> | 58008874 | rs11172030 | 0.9956 | 57278076 | A | C | 0.36 | 3.63E-03 | 2.87E-02 | 1.61E-01 |
| rs4526799 | Brain_Amygdala | 12 | <i>TSPAN31</i>    | 58138756 | rs11172030 | 0.9956 | 57278076 | A | C | 0.36 | 3.63E-03 | 4.57E-02 | 1.78E-01 |
| rs4526799 | Brain_Amygdala | 12 | <i>AVIL</i>       | 58201929 | rs11172030 | 0.9956 | 57278076 | A | C | 0.36 | 3.63E-03 | 2.48E-03 | 1.18E-01 |
| rs4526799 | Brain_Amygdala | 12 | <i>ERBB3</i>      | 56485465 | rs10876944 | 0.9956 | 57279372 | T | A | 0.36 | 3.63E-03 | 3.43E-02 | 1.67E-01 |
| rs4526799 | Brain_Amygdala | 12 | <i>ATP5B</i>      | 57035878 | rs10876944 | 0.9956 | 57279372 | T | A | 0.36 | 3.63E-03 | 1.95E-02 | 1.51E-01 |
| rs4526799 | Brain_Amygdala | 12 | <i>PRIM1</i>      | 57135785 | rs10876944 | 0.9956 | 57279372 | T | A | 0.36 | 3.63E-03 | 4.71E-03 | 1.26E-01 |
| rs4526799 | Brain_Amygdala | 12 | <i>AC025165.8</i> | 58008874 | rs10876944 | 0.9956 | 57279372 | T | A | 0.36 | 3.63E-03 | 2.87E-02 | 1.61E-01 |
| rs4526799 | Brain_Amygdala | 12 | <i>TSPAN31</i>    | 58138756 | rs10876944 | 0.9956 | 57279372 | T | A | 0.36 | 3.63E-03 | 4.57E-02 | 1.78E-01 |
| rs4526799 | Brain_Amygdala | 12 | <i>AVIL</i>       | 58201929 | rs10876944 | 0.9956 | 57279372 | T | A | 0.36 | 3.63E-03 | 2.48E-03 | 1.18E-01 |
| rs4526799 | Brain_Amygdala | 12 | <i>ERBB3</i>      | 56485465 | rs4326839  | 0.9956 | 57280374 | G | C | 0.36 | 3.58E-03 | 3.43E-02 | 1.67E-01 |
| rs4526799 | Brain_Amygdala | 12 | <i>ATP5B</i>      | 57035878 | rs4326839  | 0.9956 | 57280374 | G | C | 0.36 | 3.58E-03 | 1.95E-02 | 1.50E-01 |
| rs4526799 | Brain_Amygdala | 12 | <i>PRIM1</i>      | 57135785 | rs4326839  | 0.9956 | 57280374 | G | C | 0.36 | 3.58E-03 | 4.71E-03 | 1.25E-01 |
| rs4526799 | Brain_Amygdala | 12 | <i>AC025165.8</i> | 58008874 | rs4326839  | 0.9956 | 57280374 | G | C | 0.36 | 3.58E-03 | 2.87E-02 | 1.61E-01 |
| rs4526799 | Brain_Amygdala | 12 | <i>TSPAN31</i>    | 58138756 | rs4326839  | 0.9956 | 57280374 | G | C | 0.36 | 3.58E-03 | 4.57E-02 | 1.77E-01 |
| rs4526799 | Brain_Amygdala | 12 | <i>AVIL</i>       | 58201929 | rs4326839  | 0.9956 | 57280374 | G | C | 0.36 | 3.58E-03 | 2.48E-03 | 1.18E-01 |
| rs4526799 | Brain_Amygdala | 12 | <i>ERBB3</i>      | 56485465 | rs4526799  | 1.0000 | 57280586 | T | C | 0.34 | 7.26E-06 | 3.43E-02 | 6.91E-02 |
| rs4526799 | Brain_Amygdala | 12 | <i>ATP5B</i>      | 57035878 | rs4526799  | 1.0000 | 57280586 | T | C | 0.34 | 7.26E-06 | 1.95E-02 | 5.10E-02 |
| rs4526799 | Brain_Amygdala | 12 | <i>PRIM1</i>      | 57135785 | rs4526799  | 1.0000 | 57280586 | T | C | 0.34 | 7.26E-06 | 4.71E-03 | 2.70E-02 |
| rs4526799 | Brain_Amygdala | 12 | <i>AC025165.8</i> | 58008874 | rs4526799  | 1.0000 | 57280586 | T | C | 0.34 | 7.26E-06 | 2.87E-02 | 6.25E-02 |
| rs4526799 | Brain_Amygdala | 12 | <i>TSPAN31</i>    | 58138756 | rs4526799  | 1.0000 | 57280586 | T | C | 0.34 | 7.26E-06 | 4.57E-02 | 8.16E-02 |
| rs4526799 | Brain_Amygdala | 12 | <i>AVIL</i>       | 58201929 | rs4526799  | 1.0000 | 57280586 | T | C | 0.34 | 7.26E-06 | 2.48E-03 | 2.13E-02 |
| rs4526799 | Brain_Amygdala | 12 | <i>ERBB3</i>      | 56485465 | rs28876529 | 0.9956 | 57285301 | T | A | 0.36 | 2.25E-03 | 3.43E-02 | 1.52E-01 |
| rs4526799 | Brain_Amygdala | 12 | <i>ATP5B</i>      | 57035878 | rs28876529 | 0.9956 | 57285301 | T | A | 0.36 | 2.25E-03 | 1.95E-02 | 1.34E-01 |
| rs4526799 | Brain_Amygdala | 12 | <i>PRIM1</i>      | 57135785 | rs28876529 | 0.9956 | 57285301 | T | A | 0.36 | 2.25E-03 | 4.71E-03 | 1.08E-01 |
| rs4526799 | Brain_Amygdala | 12 | <i>AC025165.8</i> | 58008874 | rs28876529 | 0.9956 | 57285301 | T | A | 0.36 | 2.25E-03 | 2.87E-02 | 1.45E-01 |
| rs4526799 | Brain_Amygdala | 12 | <i>TSPAN31</i>    | 58138756 | rs28876529 | 0.9956 | 57285301 | T | A | 0.36 | 2.25E-03 | 4.57E-02 | 1.63E-01 |
| rs4526799 | Brain_Amygdala | 12 | <i>AVIL</i>       | 58201929 | rs28876529 | 0.9956 | 57285301 | T | A | 0.36 | 2.25E-03 | 2.48E-03 | 1.01E-01 |
| rs4526799 | Brain_Amygdala | 12 | <i>ERBB3</i>      | 56485465 | rs11172037 | 0.9956 | 57285427 | T | A | 0.36 | 2.25E-03 | 3.43E-02 | 1.52E-01 |
| rs4526799 | Brain_Amygdala | 12 | <i>ATP5B</i>      | 57035878 | rs11172037 | 0.9956 | 57285427 | T | A | 0.36 | 2.25E-03 | 1.95E-02 | 1.34E-01 |
| rs4526799 | Brain_Amygdala | 12 | <i>PRIM1</i>      | 57135785 | rs11172037 | 0.9956 | 57285427 | T | A | 0.36 | 2.25E-03 | 4.71E-03 | 1.08E-01 |
| rs4526799 | Brain_Amygdala | 12 | <i>AC025165.8</i> | 58008874 | rs11172037 | 0.9956 | 57285427 | T | A | 0.36 | 2.25E-03 | 2.87E-02 | 1.45E-01 |

|           |                |    |               |          |            |        |          |   |   |      |          |          |          |
|-----------|----------------|----|---------------|----------|------------|--------|----------|---|---|------|----------|----------|----------|
| rs4526799 | Brain_Amygdala | 12 | TSPAN31       | 58138756 | rs11172037 | 0.9956 | 57285427 | T | A | 0.36 | 2.25E-03 | 4.57E-02 | 1.63E-01 |
| rs4526799 | Brain_Amygdala | 12 | AVIL          | 58201929 | rs11172037 | 0.9956 | 57285427 | T | A | 0.36 | 2.25E-03 | 2.48E-03 | 1.01E-01 |
| rs4526799 | Brain_Amygdala | 12 | ERBB3         | 56485465 | rs12321987 | 0.9956 | 57288449 | G | A | 0.36 | 4.47E-03 | 3.43E-02 | 1.88E-01 |
| rs4526799 | Brain_Amygdala | 12 | ATP5B         | 57035878 | rs12321987 | 0.9956 | 57288449 | G | A | 0.36 | 4.47E-03 | 1.95E-02 | 1.72E-01 |
| rs4526799 | Brain_Amygdala | 12 | PRIM1         | 57135785 | rs12321987 | 0.9956 | 57288449 | G | A | 0.36 | 4.47E-03 | 4.71E-03 | 1.48E-01 |
| rs4526799 | Brain_Amygdala | 12 | AC025165.8    | 58008874 | rs12321987 | 0.9956 | 57288449 | G | A | 0.36 | 4.47E-03 | 2.87E-02 | 1.82E-01 |
| rs4526799 | Brain_Amygdala | 12 | TSPAN31       | 58138756 | rs12321987 | 0.9956 | 57288449 | G | A | 0.36 | 4.47E-03 | 4.57E-02 | 1.98E-01 |
| rs4526799 | Brain_Amygdala | 12 | AVIL          | 58201929 | rs12321987 | 0.9956 | 57288449 | G | A | 0.36 | 4.47E-03 | 2.48E-03 | 1.41E-01 |
| rs4526799 | Brain_Amygdala | 12 | ATP5B         | 57035878 | rs11172043 | 0.9869 | 57293182 | G | A | 0.35 | 4.58E-03 | 3.62E-02 | 1.88E-01 |
| rs4526799 | Brain_Amygdala | 12 | PRIM1         | 57135785 | rs11172043 | 0.9869 | 57293182 | G | A | 0.35 | 4.58E-03 | 1.53E-02 | 1.65E-01 |
| rs4526799 | Brain_Amygdala | 12 | AC025165.8    | 58008874 | rs11172043 | 0.9869 | 57293182 | G | A | 0.35 | 4.58E-03 | 2.59E-02 | 1.78E-01 |
| rs4526799 | Brain_Amygdala | 12 | AVIL          | 58201929 | rs11172043 | 0.9869 | 57293182 | G | A | 0.35 | 4.58E-03 | 4.93E-03 | 1.47E-01 |
| rs4526799 | Brain_Amygdala | 12 | ATP5B         | 57035878 | rs12426816 | 0.9869 | 57294074 | A | C | 0.35 | 4.50E-03 | 3.62E-02 | 1.88E-01 |
| rs4526799 | Brain_Amygdala | 12 | PRIM1         | 57135785 | rs12426816 | 0.9869 | 57294074 | A | C | 0.35 | 4.50E-03 | 1.53E-02 | 1.65E-01 |
| rs4526799 | Brain_Amygdala | 12 | AC025165.8    | 58008874 | rs12426816 | 0.9869 | 57294074 | A | C | 0.35 | 4.50E-03 | 2.59E-02 | 1.77E-01 |
| rs4526799 | Brain_Amygdala | 12 | AVIL          | 58201929 | rs12426816 | 0.9869 | 57294074 | A | C | 0.35 | 4.50E-03 | 4.93E-03 | 1.47E-01 |
| rs4526799 | Brain_Amygdala | 12 | ATP5B         | 57035878 | rs11172047 | 0.9869 | 57298080 | T | C | 0.35 | 6.51E-03 | 3.62E-02 | 2.01E-01 |
| rs4526799 | Brain_Amygdala | 12 | PRIM1         | 57135785 | rs11172047 | 0.9869 | 57298080 | T | C | 0.35 | 6.51E-03 | 1.53E-02 | 1.80E-01 |
| rs4526799 | Brain_Amygdala | 12 | AC025165.8    | 58008874 | rs11172047 | 0.9869 | 57298080 | T | C | 0.35 | 6.51E-03 | 2.59E-02 | 1.92E-01 |
| rs4526799 | Brain_Amygdala | 12 | AVIL          | 58201929 | rs11172047 | 0.9869 | 57298080 | T | C | 0.35 | 6.51E-03 | 4.93E-03 | 1.62E-01 |
| rs4526799 | Brain_Amygdala | 12 | ATP5B         | 57035878 | rs2371631  | 0.9869 | 57298614 | T | A | 0.35 | 6.32E-03 | 3.62E-02 | 1.98E-01 |
| rs4526799 | Brain_Amygdala | 12 | PRIM1         | 57135785 | rs2371631  | 0.9869 | 57298614 | T | A | 0.35 | 6.32E-03 | 1.53E-02 | 1.76E-01 |
| rs4526799 | Brain_Amygdala | 12 | AC025165.8    | 58008874 | rs2371631  | 0.9869 | 57298614 | T | A | 0.35 | 6.32E-03 | 2.59E-02 | 1.89E-01 |
| rs4526799 | Brain_Amygdala | 12 | AVIL          | 58201929 | rs2371631  | 0.9869 | 57298614 | T | A | 0.35 | 6.32E-03 | 4.93E-03 | 1.59E-01 |
| rs4526799 | Brain_Amygdala | 12 | ATP5B         | 57035878 | rs12305763 | 0.9869 | 57299263 | G | A | 0.35 | 6.82E-03 | 3.62E-02 | 2.03E-01 |
| rs4526799 | Brain_Amygdala | 12 | PRIM1         | 57135785 | rs12305763 | 0.9869 | 57299263 | G | A | 0.35 | 6.82E-03 | 1.53E-02 | 1.81E-01 |
| rs4526799 | Brain_Amygdala | 12 | AC025165.8    | 58008874 | rs12305763 | 0.9869 | 57299263 | G | A | 0.35 | 6.82E-03 | 2.59E-02 | 1.93E-01 |
| rs4526799 | Brain_Amygdala | 12 | AVIL          | 58201929 | rs12305763 | 0.9869 | 57299263 | G | A | 0.35 | 6.82E-03 | 4.93E-03 | 1.63E-01 |
| rs4526799 | Brain_Amygdala | 12 | RP11-603J24.5 | 56518610 | rs11172049 | 0.9128 | 57304203 | T | C | 0.35 | 1.15E-02 | 3.55E-02 | 2.02E-01 |
| rs4526799 | Brain_Amygdala | 12 | PRIM1         | 57135785 | rs11172049 | 0.9128 | 57304203 | T | C | 0.35 | 1.15E-02 | 1.10E-02 | 1.75E-01 |
| rs4526799 | Brain_Amygdala | 12 | NAB2          | 57485933 | rs11172049 | 0.9128 | 57304203 | T | C | 0.35 | 1.15E-02 | 4.68E-02 | 2.12E-01 |
| rs4526799 | Brain_Amygdala | 12 | AC025165.8    | 58008874 | rs11172049 | 0.9128 | 57304203 | T | C | 0.35 | 1.15E-02 | 1.78E-02 | 1.84E-01 |
| rs4526799 | Brain_Amygdala | 12 | AVIL          | 58201929 | rs11172049 | 0.9128 | 57304203 | T | C | 0.35 | 1.15E-02 | 1.16E-02 | 1.76E-01 |
| rs4526799 | Brain_Amygdala | 12 | RP11-603J24.5 | 56518610 | rs1874888  | 0.9085 | 57305138 | A | C | 0.35 | 1.15E-02 | 3.55E-02 | 2.02E-01 |
| rs4526799 | Brain_Amygdala | 12 | PRIM1         | 57135785 | rs1874888  | 0.9085 | 57305138 | A | C | 0.35 | 1.15E-02 | 1.10E-02 | 1.75E-01 |
| rs4526799 | Brain_Amygdala | 12 | NAB2          | 57485933 | rs1874888  | 0.9085 | 57305138 | A | C | 0.35 | 1.15E-02 | 4.68E-02 | 2.12E-01 |
| rs4526799 | Brain_Amygdala | 12 | AC025165.8    | 58008874 | rs1874888  | 0.9085 | 57305138 | A | C | 0.35 | 1.15E-02 | 1.78E-02 | 1.84E-01 |
| rs4526799 | Brain_Amygdala | 12 | AVIL          | 58201929 | rs1874888  | 0.9085 | 57305138 | A | C | 0.35 | 1.15E-02 | 1.16E-02 | 1.76E-01 |
| rs4526799 | Brain_Amygdala | 12 | PRIM1         | 57135785 | rs10506349 | 0.9128 | 57306412 | T | C | 0.37 | 1.10E-02 | 3.37E-03 | 1.49E-01 |
| rs4526799 | Brain_Amygdala | 12 | NAB2          | 57485933 | rs10506349 | 0.9128 | 57306412 | T | C | 0.37 | 1.10E-02 | 3.14E-02 | 1.89E-01 |

|           |                |    |               |          |            |        |          |   |   |      |          |          |          |
|-----------|----------------|----|---------------|----------|------------|--------|----------|---|---|------|----------|----------|----------|
| rs4526799 | Brain_Amygdala | 12 | AC025165.8    | 58008874 | rs10506349 | 0.9128 | 57306412 | T | C | 0.37 | 1.10E-02 | 2.92E-03 | 1.48E-01 |
| rs4526799 | Brain_Amygdala | 12 | B4GALNT1      | 58023536 | rs10506349 | 0.9128 | 57306412 | T | C | 0.37 | 1.10E-02 | 3.47E-02 | 1.93E-01 |
| rs4526799 | Brain_Amygdala | 12 | TSPAN31       | 58138756 | rs10506349 | 0.9128 | 57306412 | T | C | 0.37 | 1.10E-02 | 4.28E-02 | 2.00E-01 |
| rs4526799 | Brain_Amygdala | 12 | AVIL          | 58201929 | rs10506349 | 0.9128 | 57306412 | T | C | 0.37 | 1.10E-02 | 1.24E-02 | 1.67E-01 |
| rs4526799 | Brain_Amygdala | 12 | RP11-603J24.5 | 56518610 | rs10876951 | 0.9085 | 57306430 | T | G | 0.35 | 1.15E-02 | 3.55E-02 | 2.02E-01 |
| rs4526799 | Brain_Amygdala | 12 | PRIM1         | 57135785 | rs10876951 | 0.9085 | 57306430 | T | G | 0.35 | 1.15E-02 | 1.10E-02 | 1.75E-01 |
| rs4526799 | Brain_Amygdala | 12 | NAB2          | 57485933 | rs10876951 | 0.9085 | 57306430 | T | G | 0.35 | 1.15E-02 | 4.68E-02 | 2.12E-01 |
| rs4526799 | Brain_Amygdala | 12 | AC025165.8    | 58008874 | rs10876951 | 0.9085 | 57306430 | T | G | 0.35 | 1.15E-02 | 1.78E-02 | 1.84E-01 |
| rs4526799 | Brain_Amygdala | 12 | AVIL          | 58201929 | rs10876951 | 0.9085 | 57306430 | T | G | 0.35 | 1.15E-02 | 1.16E-02 | 1.76E-01 |
| rs4526799 | Brain_Amygdala | 12 | PRIM1         | 57135785 | rs10747774 | 0.9128 | 57307079 | T | C | 0.36 | 1.16E-02 | 3.37E-03 | 1.55E-01 |
| rs4526799 | Brain_Amygdala | 12 | NAB2          | 57485933 | rs10747774 | 0.9128 | 57307079 | T | C | 0.36 | 1.16E-02 | 3.14E-02 | 1.95E-01 |
| rs4526799 | Brain_Amygdala | 12 | AC025165.8    | 58008874 | rs10747774 | 0.9128 | 57307079 | T | C | 0.36 | 1.16E-02 | 2.92E-03 | 1.54E-01 |
| rs4526799 | Brain_Amygdala | 12 | B4GALNT1      | 58023536 | rs10747774 | 0.9128 | 57307079 | T | C | 0.36 | 1.16E-02 | 3.47E-02 | 1.98E-01 |
| rs4526799 | Brain_Amygdala | 12 | TSPAN31       | 58138756 | rs10747774 | 0.9128 | 57307079 | T | C | 0.36 | 1.16E-02 | 4.28E-02 | 2.05E-01 |
| rs4526799 | Brain_Amygdala | 12 | AVIL          | 58201929 | rs10747774 | 0.9128 | 57307079 | T | C | 0.36 | 1.16E-02 | 1.24E-02 | 1.73E-01 |
| rs4526799 | Brain_Amygdala | 12 | RP11-603J24.5 | 56518610 | rs10783812 | 0.9085 | 57308723 | C | T | 0.35 | 1.19E-02 | 3.55E-02 | 2.05E-01 |
| rs4526799 | Brain_Amygdala | 12 | PRIM1         | 57135785 | rs10783812 | 0.9085 | 57308723 | C | T | 0.35 | 1.19E-02 | 1.10E-02 | 1.78E-01 |
| rs4526799 | Brain_Amygdala | 12 | NAB2          | 57485933 | rs10783812 | 0.9085 | 57308723 | C | T | 0.35 | 1.19E-02 | 4.68E-02 | 2.15E-01 |
| rs4526799 | Brain_Amygdala | 12 | AC025165.8    | 58008874 | rs10783812 | 0.9085 | 57308723 | C | T | 0.35 | 1.19E-02 | 1.78E-02 | 1.87E-01 |
| rs4526799 | Brain_Amygdala | 12 | AVIL          | 58201929 | rs10783812 | 0.9085 | 57308723 | C | T | 0.35 | 1.19E-02 | 1.16E-02 | 1.79E-01 |
| rs4526799 | Brain_Amygdala | 12 | PRIM1         | 57135785 | rs11172056 | 0.9089 | 57308975 | C | T | 0.37 | 1.10E-02 | 3.37E-03 | 1.50E-01 |
| rs4526799 | Brain_Amygdala | 12 | NAB2          | 57485933 | rs11172056 | 0.9089 | 57308975 | C | T | 0.37 | 1.10E-02 | 3.14E-02 | 1.90E-01 |
| rs4526799 | Brain_Amygdala | 12 | AC025165.8    | 58008874 | rs11172056 | 0.9089 | 57308975 | C | T | 0.37 | 1.10E-02 | 2.92E-03 | 1.48E-01 |
| rs4526799 | Brain_Amygdala | 12 | B4GALNT1      | 58023536 | rs11172056 | 0.9089 | 57308975 | C | T | 0.37 | 1.10E-02 | 3.47E-02 | 1.93E-01 |
| rs4526799 | Brain_Amygdala | 12 | TSPAN31       | 58138756 | rs11172056 | 0.9089 | 57308975 | C | T | 0.37 | 1.10E-02 | 4.28E-02 | 2.00E-01 |
| rs4526799 | Brain_Amygdala | 12 | AVIL          | 58201929 | rs11172056 | 0.9089 | 57308975 | C | T | 0.37 | 1.10E-02 | 1.24E-02 | 1.68E-01 |
| rs4526799 | Brain_Amygdala | 12 | PRIM1         | 57135785 | rs7302420  | 0.9085 | 57309884 | G | C | 0.36 | 1.54E-02 | 1.24E-02 | 1.97E-01 |
| rs4526799 | Brain_Amygdala | 12 | AC025165.8    | 58008874 | rs7302420  | 0.9085 | 57309884 | G | C | 0.36 | 1.54E-02 | 1.16E-02 | 1.96E-01 |
| rs4526799 | Brain_Amygdala | 12 | TSPAN31       | 58138756 | rs7302420  | 0.9085 | 57309884 | G | C | 0.36 | 1.54E-02 | 1.97E-02 | 2.06E-01 |
| rs4526799 | Brain_Amygdala | 12 | AVIL          | 58201929 | rs7302420  | 0.9085 | 57309884 | G | C | 0.36 | 1.54E-02 | 6.42E-03 | 1.87E-01 |
| rs4526799 | Brain_Amygdala | 12 | RNF41         | 56607001 | rs12228618 | 0.9128 | 57311229 | T | C | 0.37 | 1.29E-02 | 4.86E-02 | 2.13E-01 |
| rs4526799 | Brain_Amygdala | 12 | PRIM1         | 57135785 | rs12228618 | 0.9128 | 57311229 | T | C | 0.37 | 1.29E-02 | 9.05E-04 | 1.48E-01 |
| rs4526799 | Brain_Amygdala | 12 | NAB2          | 57485933 | rs12228618 | 0.9128 | 57311229 | T | C | 0.37 | 1.29E-02 | 2.51E-02 | 1.92E-01 |
| rs4526799 | Brain_Amygdala | 12 | AC025165.8    | 58008874 | rs12228618 | 0.9128 | 57311229 | T | C | 0.37 | 1.29E-02 | 5.09E-03 | 1.64E-01 |
| rs4526799 | Brain_Amygdala | 12 | B4GALNT1      | 58023536 | rs12228618 | 0.9128 | 57311229 | T | C | 0.37 | 1.29E-02 | 4.44E-02 | 2.10E-01 |
| rs4526799 | Brain_Amygdala | 12 | TSPAN31       | 58138756 | rs12228618 | 0.9128 | 57311229 | T | C | 0.37 | 1.29E-02 | 3.19E-02 | 1.99E-01 |
| rs4526799 | Brain_Amygdala | 12 | AVIL          | 58201929 | rs12228618 | 0.9128 | 57311229 | T | C | 0.37 | 1.29E-02 | 2.59E-02 | 1.93E-01 |
| rs4526799 | Brain_Amygdala | 12 | PRIM1         | 57135785 | rs9739473  | 0.9012 | 57313335 | A | T | 0.37 | 2.65E-02 | 1.93E-03 | 2.30E-01 |
| rs4526799 | Brain_Amygdala | 12 | NAB2          | 57485933 | rs9739473  | 0.9012 | 57313335 | A | T | 0.37 | 2.65E-02 | 2.88E-02 | 2.63E-01 |
| rs4526799 | Brain_Amygdala | 12 | AC025165.8    | 58008874 | rs9739473  | 0.9012 | 57313335 | A | T | 0.37 | 2.65E-02 | 4.10E-03 | 2.35E-01 |

|           |                                      |    |                |          |            |        |          |   |   |      |          |          |          |
|-----------|--------------------------------------|----|----------------|----------|------------|--------|----------|---|---|------|----------|----------|----------|
| rs4526799 | Brain_Amygdala                       | 12 | TSPAN31        | 58138756 | rs9739473  | 0.9012 | 57313335 | A | T | 0.37 | 2.65E-02 | 3.65E-02 | 2.69E-01 |
| rs4526799 | Brain_Amygdala                       | 12 | AVIL           | 58201929 | rs9739473  | 0.9012 | 57313335 | A | T | 0.37 | 2.65E-02 | 1.35E-02 | 2.49E-01 |
| rs4526799 | Brain_Anterior_cingulate_cortex_BA24 | 12 | DGKA           | 56334604 | rs9919772  | 0.8450 | 57260027 | T | C | 0.33 | 1.03E-02 | 2.85E-02 | 2.18E-01 |
| rs4526799 | Brain_Anterior_cingulate_cortex_BA24 | 12 | MYL6           | 56554355 | rs9919772  | 0.8450 | 57260027 | T | C | 0.33 | 1.03E-02 | 3.73E-02 | 2.26E-01 |
| rs4526799 | Brain_Anterior_cingulate_cortex_BA24 | 12 | RP11-977G19.11 | 56701259 | rs9919772  | 0.8450 | 57260027 | T | C | 0.33 | 1.03E-02 | 5.34E-03 | 1.89E-01 |
| rs4526799 | Brain_Anterior_cingulate_cortex_BA24 | 12 | CNPY2          | 56706816 | rs9919772  | 0.8450 | 57260027 | T | C | 0.33 | 1.03E-02 | 2.93E-02 | 2.19E-01 |
| rs4526799 | Brain_Anterior_cingulate_cortex_BA24 | 12 | TIMELESS       | 56827045 | rs9919772  | 0.8450 | 57260027 | T | C | 0.33 | 1.03E-02 | 1.37E-02 | 2.02E-01 |
| rs4526799 | Brain_Anterior_cingulate_cortex_BA24 | 12 | TMEM194A       | 57465636 | rs9919772  | 0.8450 | 57260027 | T | C | 0.33 | 1.03E-02 | 2.04E-04 | 1.67E-01 |
| rs4526799 | Brain_Anterior_cingulate_cortex_BA24 | 12 | INHBE          | 57849584 | rs9919772  | 0.8450 | 57260027 | T | C | 0.33 | 1.03E-02 | 5.48E-03 | 1.89E-01 |
| rs4526799 | Brain_Anterior_cingulate_cortex_BA24 | 12 | RP11-571M6.17  | 58197909 | rs9919772  | 0.8450 | 57260027 | T | C | 0.33 | 1.03E-02 | 4.15E-02 | 2.29E-01 |
| rs4526799 | Brain_Anterior_cingulate_cortex_BA24 | 12 | MYL6           | 56554355 | rs4495925  | 0.8650 | 57268116 | C | G | 0.33 | 1.04E-02 | 4.69E-02 | 2.31E-01 |
| rs4526799 | Brain_Anterior_cingulate_cortex_BA24 | 12 | RP11-977G19.11 | 56701259 | rs4495925  | 0.8650 | 57268116 | C | G | 0.33 | 1.04E-02 | 7.67E-03 | 1.90E-01 |
| rs4526799 | Brain_Anterior_cingulate_cortex_BA24 | 12 | CNPY2          | 56706816 | rs4495925  | 0.8650 | 57268116 | C | G | 0.33 | 1.04E-02 | 3.58E-02 | 2.22E-01 |
| rs4526799 | Brain_Anterior_cingulate_cortex_BA24 | 12 | TIMELESS       | 56827045 | rs4495925  | 0.8650 | 57268116 | C | G | 0.33 | 1.04E-02 | 2.95E-02 | 2.16E-01 |
| rs4526799 | Brain_Anterior_cingulate_cortex_BA24 | 12 | TMEM194A       | 57465636 | rs4495925  | 0.8650 | 57268116 | C | G | 0.33 | 1.04E-02 | 1.82E-04 | 1.63E-01 |
| rs4526799 | Brain_Anterior_cingulate_cortex_BA24 | 12 | INHBE          | 57849584 | rs4495925  | 0.8650 | 57268116 | C | G | 0.33 | 1.04E-02 | 7.64E-04 | 1.70E-01 |
| rs4526799 | Brain_Anterior_cingulate_cortex_BA24 | 12 | RP11-571M6.17  | 58197909 | rs4495925  | 0.8650 | 57268116 | C | G | 0.33 | 1.04E-02 | 3.90E-02 | 2.24E-01 |
| rs4526799 | Brain_Anterior_cingulate_cortex_BA24 | 12 | RP11-571M6.18  | 58208493 | rs4495925  | 0.8650 | 57268116 | C | G | 0.33 | 1.04E-02 | 4.19E-02 | 2.27E-01 |
| rs4526799 | Brain_Anterior_cingulate_cortex_BA24 | 12 | MYL6           | 56554355 | rs4471472  | 0.8650 | 57268985 | A | G | 0.32 | 9.99E-03 | 4.25E-02 | 2.23E-01 |
| rs4526799 | Brain_Anterior_cingulate_cortex_BA24 | 12 | RP11-977G19.11 | 56701259 | rs4471472  | 0.8650 | 57268985 | A | G | 0.32 | 9.99E-03 | 7.46E-03 | 1.86E-01 |
| rs4526799 | Brain_Anterior_cingulate_cortex_BA24 | 12 | CNPY2          | 56706816 | rs4471472  | 0.8650 | 57268985 | A | G | 0.32 | 9.99E-03 | 2.71E-02 | 2.10E-01 |
| rs4526799 | Brain_Anterior_cingulate_cortex_BA24 | 12 | TIMELESS       | 56827045 | rs4471472  | 0.8650 | 57268985 | A | G | 0.32 | 9.99E-03 | 2.96E-02 | 2.12E-01 |
| rs4526799 | Brain_Anterior_cingulate_cortex_BA24 | 12 | TMEM194A       | 57465636 | rs4471472  | 0.8650 | 57268985 | A | G | 0.32 | 9.99E-03 | 2.10E-04 | 1.59E-01 |
| rs4526799 | Brain_Anterior_cingulate_cortex_BA24 | 12 | INHBE          | 57849584 | rs4471472  | 0.8650 | 57268985 | A | G | 0.32 | 9.99E-03 | 7.69E-04 | 1.66E-01 |
| rs4526799 | Brain_Anterior_cingulate_cortex_BA24 | 12 | RP11-571M6.17  | 58197909 | rs4471472  | 0.8650 | 57268985 | A | G | 0.32 | 9.99E-03 | 3.70E-02 | 2.19E-01 |
| rs4526799 | Brain_Anterior_cingulate_cortex_BA24 | 12 | AVIL           | 58201929 | rs4471472  | 0.8650 | 57268985 | A | G | 0.32 | 9.99E-03 | 4.84E-02 | 2.28E-01 |
| rs4526799 | Brain_Anterior_cingulate_cortex_BA24 | 12 | RP11-571M6.18  | 58208493 | rs4471472  | 0.8650 | 57268985 | A | G | 0.32 | 9.99E-03 | 4.17E-02 | 2.23E-01 |
| rs4526799 | Brain_Anterior_cingulate_cortex_BA24 | 12 | MYL6           | 56554355 | rs4633499  | 0.8610 | 57269264 | A | T | 0.32 | 1.43E-02 | 3.97E-02 | 2.55E-01 |
| rs4526799 | Brain_Anterior_cingulate_cortex_BA24 | 12 | RP11-977G19.11 | 56701259 | rs4633499  | 0.8610 | 57269264 | A | T | 0.32 | 1.43E-02 | 1.45E-02 | 2.33E-01 |
| rs4526799 | Brain_Anterior_cingulate_cortex_BA24 | 12 | CNPY2          | 56706816 | rs4633499  | 0.8610 | 57269264 | A | T | 0.32 | 1.43E-02 | 1.86E-02 | 2.37E-01 |
| rs4526799 | Brain_Anterior_cingulate_cortex_BA24 | 12 | TIMELESS       | 56827045 | rs4633499  | 0.8610 | 57269264 | A | T | 0.32 | 1.43E-02 | 3.30E-02 | 2.50E-01 |
| rs4526799 | Brain_Anterior_cingulate_cortex_BA24 | 12 | TMEM194A       | 57465636 | rs4633499  | 0.8610 | 57269264 | A | T | 0.32 | 1.43E-02 | 1.49E-04 | 1.98E-01 |
| rs4526799 | Brain_Anterior_cingulate_cortex_BA24 | 12 | INHBE          | 57849584 | rs4633499  | 0.8610 | 57269264 | A | T | 0.32 | 1.43E-02 | 4.42E-04 | 2.02E-01 |
| rs4526799 | Brain_Anterior_cingulate_cortex_BA24 | 12 | RP11-571M6.17  | 58197909 | rs4633499  | 0.8610 | 57269264 | A | T | 0.32 | 1.43E-02 | 3.65E-02 | 2.52E-01 |
| rs4526799 | Brain_Anterior_cingulate_cortex_BA24 | 12 | RP11-571M6.18  | 58208493 | rs4633499  | 0.8610 | 57269264 | A | T | 0.32 | 1.43E-02 | 3.11E-02 | 2.48E-01 |
| rs4526799 | Brain_Anterior_cingulate_cortex_BA24 | 12 | MYL6           | 56554355 | rs12300079 | 0.9956 | 57273194 | T | C | 0.36 | 3.73E-03 | 2.00E-02 | 1.53E-01 |
| rs4526799 | Brain_Anterior_cingulate_cortex_BA24 | 12 | CNPY2          | 56706816 | rs12300079 | 0.9956 | 57273194 | T | C | 0.36 | 3.73E-03 | 4.26E-02 | 1.77E-01 |
| rs4526799 | Brain_Anterior_cingulate_cortex_BA24 | 12 | BAZZA          | 57009990 | rs12300079 | 0.9956 | 57273194 | T | C | 0.36 | 3.73E-03 | 2.49E-02 | 1.59E-01 |
| rs4526799 | Brain_Anterior_cingulate_cortex_BA24 | 12 | TMEM194A       | 57465636 | rs12300079 | 0.9956 | 57273194 | T | C | 0.36 | 3.73E-03 | 1.24E-03 | 1.14E-01 |
| rs4526799 | Brain_Anterior_cingulate_cortex_BA24 | 12 | INHBE          | 57849584 | rs12300079 | 0.9956 | 57273194 | T | C | 0.36 | 3.73E-03 | 2.13E-03 | 1.19E-01 |



|           |                                      |    |                      |          |            |        |          |   |   |      |          |          |          |
|-----------|--------------------------------------|----|----------------------|----------|------------|--------|----------|---|---|------|----------|----------|----------|
| rs4526799 | Brain_Anterior_cingulate_cortex_BA24 | 12 | <i>RP11-571M6.17</i> | 58197909 | rs12300079 | 0.9956 | 57273194 | T | C | 0.36 | 3.73E-03 | 4.77E-02 | 1.82E-01 |
| rs4526799 | Brain_Anterior_cingulate_cortex_BA24 | 12 | <i>AVIL</i>          | 58201929 | rs12300079 | 0.9956 | 57273194 | T | C | 0.36 | 3.73E-03 | 1.61E-02 | 1.48E-01 |
| rs4526799 | Brain_Anterior_cingulate_cortex_BA24 | 12 | <i>MYL6</i>          | 56554355 | rs12300191 | 0.9956 | 57273289 | A | G | 0.36 | 3.59E-03 | 2.10E-02 | 1.52E-01 |
| rs4526799 | Brain_Anterior_cingulate_cortex_BA24 | 12 | <i>CNPY2</i>         | 56706816 | rs12300191 | 0.9956 | 57273289 | A | G | 0.36 | 3.59E-03 | 4.40E-02 | 1.76E-01 |
| rs4526799 | Brain_Anterior_cingulate_cortex_BA24 | 12 | <i>BAZ2A</i>         | 57009990 | rs12300191 | 0.9956 | 57273289 | A | G | 0.36 | 3.59E-03 | 2.80E-02 | 1.60E-01 |
| rs4526799 | Brain_Anterior_cingulate_cortex_BA24 | 12 | <i>TMEM194A</i>      | 57465636 | rs12300191 | 0.9956 | 57273289 | A | G | 0.36 | 3.59E-03 | 9.25E-04 | 1.10E-01 |
| rs4526799 | Brain_Anterior_cingulate_cortex_BA24 | 12 | <i>INHBE</i>         | 57849584 | rs12300191 | 0.9956 | 57273289 | A | G | 0.36 | 3.59E-03 | 1.93E-03 | 1.15E-01 |
| rs4526799 | Brain_Anterior_cingulate_cortex_BA24 | 12 | <i>RP11-571M6.17</i> | 58197909 | rs12300191 | 0.9956 | 57273289 | A | G | 0.36 | 3.59E-03 | 4.87E-02 | 1.80E-01 |
| rs4526799 | Brain_Anterior_cingulate_cortex_BA24 | 12 | <i>AVIL</i>          | 58201929 | rs12300191 | 0.9956 | 57273289 | A | G | 0.36 | 3.59E-03 | 1.68E-02 | 1.47E-01 |
| rs4526799 | Brain_Anterior_cingulate_cortex_BA24 | 12 | <i>MYL6</i>          | 56554355 | rs4514464  | 0.9956 | 57276375 | C | T | 0.36 | 2.92E-03 | 2.10E-02 | 1.49E-01 |
| rs4526799 | Brain_Anterior_cingulate_cortex_BA24 | 12 | <i>CNPY2</i>         | 56706816 | rs4514464  | 0.9956 | 57276375 | C | T | 0.36 | 2.92E-03 | 4.40E-02 | 1.73E-01 |
| rs4526799 | Brain_Anterior_cingulate_cortex_BA24 | 12 | <i>BAZ2A</i>         | 57009990 | rs4514464  | 0.9956 | 57276375 | C | T | 0.36 | 2.92E-03 | 2.80E-02 | 1.57E-01 |
| rs4526799 | Brain_Anterior_cingulate_cortex_BA24 | 12 | <i>TMEM194A</i>      | 57465636 | rs4514464  | 0.9956 | 57276375 | C | T | 0.36 | 2.92E-03 | 9.25E-04 | 1.06E-01 |
| rs4526799 | Brain_Anterior_cingulate_cortex_BA24 | 12 | <i>INHBE</i>         | 57849584 | rs4514464  | 0.9956 | 57276375 | C | T | 0.36 | 2.92E-03 | 1.93E-03 | 1.12E-01 |
| rs4526799 | Brain_Anterior_cingulate_cortex_BA24 | 12 | <i>RP11-571M6.17</i> | 58197909 | rs4514464  | 0.9956 | 57276375 | C | T | 0.36 | 2.92E-03 | 4.87E-02 | 1.77E-01 |
| rs4526799 | Brain_Anterior_cingulate_cortex_BA24 | 12 | <i>AVIL</i>          | 58201929 | rs4514464  | 0.9956 | 57276375 | C | T | 0.36 | 2.92E-03 | 1.68E-02 | 1.43E-01 |
| rs4526799 | Brain_Anterior_cingulate_cortex_BA24 | 12 | <i>MYL6</i>          | 56554355 | rs4417325  | 0.9956 | 57277302 | G | A | 0.36 | 3.59E-03 | 2.10E-02 | 1.52E-01 |
| rs4526799 | Brain_Anterior_cingulate_cortex_BA24 | 12 | <i>CNPY2</i>         | 56706816 | rs4417325  | 0.9956 | 57277302 | G | A | 0.36 | 3.59E-03 | 4.40E-02 | 1.76E-01 |
| rs4526799 | Brain_Anterior_cingulate_cortex_BA24 | 12 | <i>BAZ2A</i>         | 57009990 | rs4417325  | 0.9956 | 57277302 | G | A | 0.36 | 3.59E-03 | 2.80E-02 | 1.60E-01 |
| rs4526799 | Brain_Anterior_cingulate_cortex_BA24 | 12 | <i>TMEM194A</i>      | 57465636 | rs4417325  | 0.9956 | 57277302 | G | A | 0.36 | 3.59E-03 | 9.25E-04 | 1.10E-01 |
| rs4526799 | Brain_Anterior_cingulate_cortex_BA24 | 12 | <i>INHBE</i>         | 57849584 | rs4417325  | 0.9956 | 57277302 | G | A | 0.36 | 3.59E-03 | 1.93E-03 | 1.15E-01 |
| rs4526799 | Brain_Anterior_cingulate_cortex_BA24 | 12 | <i>RP11-571M6.17</i> | 58197909 | rs4417325  | 0.9956 | 57277302 | G | A | 0.36 | 3.59E-03 | 4.87E-02 | 1.80E-01 |
| rs4526799 | Brain_Anterior_cingulate_cortex_BA24 | 12 | <i>AVIL</i>          | 58201929 | rs4417325  | 0.9956 | 57277302 | G | A | 0.36 | 3.59E-03 | 1.68E-02 | 1.47E-01 |
| rs4526799 | Brain_Anterior_cingulate_cortex_BA24 | 12 | <i>MYL6</i>          | 56554355 | rs11172030 | 0.9956 | 57278076 | A | C | 0.36 | 3.63E-03 | 2.10E-02 | 1.53E-01 |
| rs4526799 | Brain_Anterior_cingulate_cortex_BA24 | 12 | <i>CNPY2</i>         | 56706816 | rs11172030 | 0.9956 | 57278076 | A | C | 0.36 | 3.63E-03 | 4.40E-02 | 1.77E-01 |
| rs4526799 | Brain_Anterior_cingulate_cortex_BA24 | 12 | <i>BAZ2A</i>         | 57009990 | rs11172030 | 0.9956 | 57278076 | A | C | 0.36 | 3.63E-03 | 2.80E-02 | 1.61E-01 |
| rs4526799 | Brain_Anterior_cingulate_cortex_BA24 | 12 | <i>TMEM194A</i>      | 57465636 | rs11172030 | 0.9956 | 57278076 | A | C | 0.36 | 3.63E-03 | 9.25E-04 | 1.10E-01 |
| rs4526799 | Brain_Anterior_cingulate_cortex_BA24 | 12 | <i>INHBE</i>         | 57849584 | rs11172030 | 0.9956 | 57278076 | A | C | 0.36 | 3.63E-03 | 1.93E-03 | 1.16E-01 |
| rs4526799 | Brain_Anterior_cingulate_cortex_BA24 | 12 | <i>RP11-571M6.17</i> | 58197909 | rs11172030 | 0.9956 | 57278076 | A | C | 0.36 | 3.63E-03 | 4.87E-02 | 1.81E-01 |
| rs4526799 | Brain_Anterior_cingulate_cortex_BA24 | 12 | <i>AVIL</i>          | 58201929 | rs11172030 | 0.9956 | 57278076 | A | C | 0.36 | 3.63E-03 | 1.68E-02 | 1.47E-01 |
| rs4526799 | Brain_Anterior_cingulate_cortex_BA24 | 12 | <i>MYL6</i>          | 56554355 | rs10876944 | 0.9956 | 57279372 | T | A | 0.36 | 3.63E-03 | 2.10E-02 | 1.53E-01 |
| rs4526799 | Brain_Anterior_cingulate_cortex_BA24 | 12 | <i>CNPY2</i>         | 56706816 | rs10876944 | 0.9956 | 57279372 | T | A | 0.36 | 3.63E-03 | 4.40E-02 | 1.77E-01 |
| rs4526799 | Brain_Anterior_cingulate_cortex_BA24 | 12 | <i>BAZ2A</i>         | 57009990 | rs10876944 | 0.9956 | 57279372 | T | A | 0.36 | 3.63E-03 | 2.80E-02 | 1.61E-01 |
| rs4526799 | Brain_Anterior_cingulate_cortex_BA24 | 12 | <i>TMEM194A</i>      | 57465636 | rs10876944 | 0.9956 | 57279372 | T | A | 0.36 | 3.63E-03 | 9.25E-04 | 1.10E-01 |
| rs4526799 | Brain_Anterior_cingulate_cortex_BA24 | 12 | <i>INHBE</i>         | 57849584 | rs10876944 | 0.9956 | 57279372 | T | A | 0.36 | 3.63E-03 | 1.93E-03 | 1.16E-01 |
| rs4526799 | Brain_Anterior_cingulate_cortex_BA24 | 12 | <i>RP11-571M6.17</i> | 58197909 | rs10876944 | 0.9956 | 57279372 | T | A | 0.36 | 3.63E-03 | 4.87E-02 | 1.81E-01 |
| rs4526799 | Brain_Anterior_cingulate_cortex_BA24 | 12 | <i>AVIL</i>          | 58201929 | rs10876944 | 0.9956 | 57279372 | T | A | 0.36 | 3.63E-03 | 1.68E-02 | 1.47E-01 |
| rs4526799 | Brain_Anterior_cingulate_cortex_BA24 | 12 | <i>MYL6</i>          | 56554355 | rs4326839  | 0.9956 | 57280374 | G | C | 0.36 | 3.58E-03 | 2.10E-02 | 1.52E-01 |
| rs4526799 | Brain_Anterior_cingulate_cortex_BA24 | 12 | <i>CNPY2</i>         | 56706816 | rs4326839  | 0.9956 | 57280374 | G | C | 0.36 | 3.58E-03 | 4.40E-02 | 1.76E-01 |
| rs4526799 | Brain_Anterior_cingulate_cortex_BA24 | 12 | <i>BAZ2A</i>         | 57009990 | rs4326839  | 0.9956 | 57280374 | G | C | 0.36 | 3.58E-03 | 2.80E-02 | 1.60E-01 |

|           |                                      |    |                      |          |            |        |          |   |   |      |          |          |          |
|-----------|--------------------------------------|----|----------------------|----------|------------|--------|----------|---|---|------|----------|----------|----------|
| rs4526799 | Brain_Anterior_cingulate_cortex_BA24 | 12 | <i>TMEM194A</i>      | 57465636 | rs4326839  | 0.9956 | 57280374 | G | C | 0.36 | 3.58E-03 | 9.25E-04 | 1.09E-01 |
| rs4526799 | Brain_Anterior_cingulate_cortex_BA24 | 12 | <i>INHBE</i>         | 57849584 | rs4326839  | 0.9956 | 57280374 | G | C | 0.36 | 3.58E-03 | 1.93E-03 | 1.15E-01 |
| rs4526799 | Brain_Anterior_cingulate_cortex_BA24 | 12 | <i>RP11-571M6.17</i> | 58197909 | rs4326839  | 0.9956 | 57280374 | G | C | 0.36 | 3.58E-03 | 4.87E-02 | 1.80E-01 |
| rs4526799 | Brain_Anterior_cingulate_cortex_BA24 | 12 | <i>AVIL</i>          | 58201929 | rs4326839  | 0.9956 | 57280374 | G | C | 0.36 | 3.58E-03 | 1.68E-02 | 1.46E-01 |
| rs4526799 | Brain_Anterior_cingulate_cortex_BA24 | 12 | <i>MYL6</i>          | 56554355 | rs4526799  | 1.0000 | 57280586 | T | C | 0.34 | 7.26E-06 | 2.10E-02 | 5.30E-02 |
| rs4526799 | Brain_Anterior_cingulate_cortex_BA24 | 12 | <i>CNPY2</i>         | 56706816 | rs4526799  | 1.0000 | 57280586 | T | C | 0.34 | 7.26E-06 | 4.40E-02 | 7.98E-02 |
| rs4526799 | Brain_Anterior_cingulate_cortex_BA24 | 12 | <i>BAZ2A</i>         | 57009990 | rs4526799  | 1.0000 | 57280586 | T | C | 0.34 | 7.26E-06 | 2.80E-02 | 6.17E-02 |
| rs4526799 | Brain_Anterior_cingulate_cortex_BA24 | 12 | <i>TMEM194A</i>      | 57465636 | rs4526799  | 1.0000 | 57280586 | T | C | 0.34 | 7.26E-06 | 9.25E-04 | 1.54E-02 |
| rs4526799 | Brain_Anterior_cingulate_cortex_BA24 | 12 | <i>INHBE</i>         | 57849584 | rs4526799  | 1.0000 | 57280586 | T | C | 0.34 | 7.26E-06 | 1.93E-03 | 1.95E-02 |
| rs4526799 | Brain_Anterior_cingulate_cortex_BA24 | 12 | <i>RP11-571M6.17</i> | 58197909 | rs4526799  | 1.0000 | 57280586 | T | C | 0.34 | 7.26E-06 | 4.87E-02 | 8.48E-02 |
| rs4526799 | Brain_Anterior_cingulate_cortex_BA24 | 12 | <i>AVIL</i>          | 58201929 | rs4526799  | 1.0000 | 57280586 | T | C | 0.34 | 7.26E-06 | 1.68E-02 | 4.73E-02 |
| rs4526799 | Brain_Anterior_cingulate_cortex_BA24 | 12 | <i>MYL6</i>          | 56554355 | rs28876529 | 0.9956 | 57285301 | T | A | 0.36 | 2.25E-03 | 2.10E-02 | 1.36E-01 |
| rs4526799 | Brain_Anterior_cingulate_cortex_BA24 | 12 | <i>CNPY2</i>         | 56706816 | rs28876529 | 0.9956 | 57285301 | T | A | 0.36 | 2.25E-03 | 4.40E-02 | 1.61E-01 |
| rs4526799 | Brain_Anterior_cingulate_cortex_BA24 | 12 | <i>BAZ2A</i>         | 57009990 | rs28876529 | 0.9956 | 57285301 | T | A | 0.36 | 2.25E-03 | 2.80E-02 | 1.45E-01 |
| rs4526799 | Brain_Anterior_cingulate_cortex_BA24 | 12 | <i>TMEM194A</i>      | 57465636 | rs28876529 | 0.9956 | 57285301 | T | A | 0.36 | 2.25E-03 | 9.25E-04 | 9.28E-02 |
| rs4526799 | Brain_Anterior_cingulate_cortex_BA24 | 12 | <i>INHBE</i>         | 57849584 | rs28876529 | 0.9956 | 57285301 | T | A | 0.36 | 2.25E-03 | 1.93E-03 | 9.88E-02 |
| rs4526799 | Brain_Anterior_cingulate_cortex_BA24 | 12 | <i>RP11-571M6.17</i> | 58197909 | rs28876529 | 0.9956 | 57285301 | T | A | 0.36 | 2.25E-03 | 4.87E-02 | 1.66E-01 |
| rs4526799 | Brain_Anterior_cingulate_cortex_BA24 | 12 | <i>AVIL</i>          | 58201929 | rs28876529 | 0.9956 | 57285301 | T | A | 0.36 | 2.25E-03 | 1.68E-02 | 1.31E-01 |
| rs4526799 | Brain_Anterior_cingulate_cortex_BA24 | 12 | <i>MYL6</i>          | 56554355 | rs11172037 | 0.9956 | 57285427 | T | A | 0.36 | 2.25E-03 | 2.10E-02 | 1.36E-01 |
| rs4526799 | Brain_Anterior_cingulate_cortex_BA24 | 12 | <i>CNPY2</i>         | 56706816 | rs11172037 | 0.9956 | 57285427 | T | A | 0.36 | 2.25E-03 | 4.40E-02 | 1.61E-01 |
| rs4526799 | Brain_Anterior_cingulate_cortex_BA24 | 12 | <i>BAZ2A</i>         | 57009990 | rs11172037 | 0.9956 | 57285427 | T | A | 0.36 | 2.25E-03 | 2.80E-02 | 1.45E-01 |
| rs4526799 | Brain_Anterior_cingulate_cortex_BA24 | 12 | <i>TMEM194A</i>      | 57465636 | rs11172037 | 0.9956 | 57285427 | T | A | 0.36 | 2.25E-03 | 9.25E-04 | 9.28E-02 |
| rs4526799 | Brain_Anterior_cingulate_cortex_BA24 | 12 | <i>INHBE</i>         | 57849584 | rs11172037 | 0.9956 | 57285427 | T | A | 0.36 | 2.25E-03 | 1.93E-03 | 9.88E-02 |
| rs4526799 | Brain_Anterior_cingulate_cortex_BA24 | 12 | <i>RP11-571M6.17</i> | 58197909 | rs11172037 | 0.9956 | 57285427 | T | A | 0.36 | 2.25E-03 | 4.87E-02 | 1.66E-01 |
| rs4526799 | Brain_Anterior_cingulate_cortex_BA24 | 12 | <i>AVIL</i>          | 58201929 | rs11172037 | 0.9956 | 57285427 | T | A | 0.36 | 2.25E-03 | 1.68E-02 | 1.31E-01 |
| rs4526799 | Brain_Anterior_cingulate_cortex_BA24 | 12 | <i>MYL6</i>          | 56554355 | rs12321987 | 0.9956 | 57288449 | G | A | 0.36 | 4.47E-03 | 2.10E-02 | 1.74E-01 |
| rs4526799 | Brain_Anterior_cingulate_cortex_BA24 | 12 | <i>CNPY2</i>         | 56706816 | rs12321987 | 0.9956 | 57288449 | G | A | 0.36 | 4.47E-03 | 4.40E-02 | 1.96E-01 |
| rs4526799 | Brain_Anterior_cingulate_cortex_BA24 | 12 | <i>BAZ2A</i>         | 57009990 | rs12321987 | 0.9956 | 57288449 | G | A | 0.36 | 4.47E-03 | 2.80E-02 | 1.81E-01 |
| rs4526799 | Brain_Anterior_cingulate_cortex_BA24 | 12 | <i>TMEM194A</i>      | 57465636 | rs12321987 | 0.9956 | 57288449 | G | A | 0.36 | 4.47E-03 | 9.25E-04 | 1.33E-01 |
| rs4526799 | Brain_Anterior_cingulate_cortex_BA24 | 12 | <i>INHBE</i>         | 57849584 | rs12321987 | 0.9956 | 57288449 | G | A | 0.36 | 4.47E-03 | 1.93E-03 | 1.39E-01 |
| rs4526799 | Brain_Anterior_cingulate_cortex_BA24 | 12 | <i>RP11-571M6.17</i> | 58197909 | rs12321987 | 0.9956 | 57288449 | G | A | 0.36 | 4.47E-03 | 4.87E-02 | 2.00E-01 |
| rs4526799 | Brain_Anterior_cingulate_cortex_BA24 | 12 | <i>AVIL</i>          | 58201929 | rs12321987 | 0.9956 | 57288449 | G | A | 0.36 | 4.47E-03 | 1.68E-02 | 1.69E-01 |
| rs4526799 | Brain_Anterior_cingulate_cortex_BA24 | 12 | <i>MYL6</i>          | 56554355 | rs11172043 | 0.9869 | 57293182 | G | A | 0.35 | 4.58E-03 | 1.26E-02 | 1.61E-01 |
| rs4526799 | Brain_Anterior_cingulate_cortex_BA24 | 12 | <i>BAZ2A</i>         | 57009990 | rs11172043 | 0.9869 | 57293182 | G | A | 0.35 | 4.58E-03 | 2.32E-02 | 1.75E-01 |
| rs4526799 | Brain_Anterior_cingulate_cortex_BA24 | 12 | <i>TMEM194A</i>      | 57465636 | rs11172043 | 0.9869 | 57293182 | G | A | 0.35 | 4.58E-03 | 5.92E-04 | 1.29E-01 |
| rs4526799 | Brain_Anterior_cingulate_cortex_BA24 | 12 | <i>INHBE</i>         | 57849584 | rs11172043 | 0.9869 | 57293182 | G | A | 0.35 | 4.58E-03 | 9.49E-04 | 1.32E-01 |
| rs4526799 | Brain_Anterior_cingulate_cortex_BA24 | 12 | <i>AVIL</i>          | 58201929 | rs11172043 | 0.9869 | 57293182 | G | A | 0.35 | 4.58E-03 | 2.30E-02 | 1.75E-01 |
| rs4526799 | Brain_Anterior_cingulate_cortex_BA24 | 12 | <i>MYL6</i>          | 56554355 | rs12426816 | 0.9869 | 57294074 | A | C | 0.35 | 4.50E-03 | 1.26E-02 | 1.61E-01 |
| rs4526799 | Brain_Anterior_cingulate_cortex_BA24 | 12 | <i>BAZ2A</i>         | 57009990 | rs12426816 | 0.9869 | 57294074 | A | C | 0.35 | 4.50E-03 | 2.32E-02 | 1.74E-01 |
| rs4526799 | Brain_Anterior_cingulate_cortex_BA24 | 12 | <i>TMEM194A</i>      | 57465636 | rs12426816 | 0.9869 | 57294074 | A | C | 0.35 | 4.50E-03 | 5.92E-04 | 1.29E-01 |

|           |                                      |    |                      |          |            |        |          |   |   |      |          |          |          |
|-----------|--------------------------------------|----|----------------------|----------|------------|--------|----------|---|---|------|----------|----------|----------|
| rs4526799 | Brain_Anterior_cingulate_cortex_BA24 | 12 | <i>INHBE</i>         | 57849584 | rs12426816 | 0.9869 | 57294074 | A | C | 0.35 | 4.50E-03 | 9.49E-04 | 1.32E-01 |
| rs4526799 | Brain_Anterior_cingulate_cortex_BA24 | 12 | <i>AVIL</i>          | 58201929 | rs12426816 | 0.9869 | 57294074 | A | C | 0.35 | 4.50E-03 | 2.30E-02 | 1.74E-01 |
| rs4526799 | Brain_Anterior_cingulate_cortex_BA24 | 12 | <i>MYL6</i>          | 56554355 | rs11172047 | 0.9869 | 57298080 | T | C | 0.35 | 6.51E-03 | 1.26E-02 | 1.76E-01 |
| rs4526799 | Brain_Anterior_cingulate_cortex_BA24 | 12 | <i>BAZ2A</i>         | 57009990 | rs11172047 | 0.9869 | 57298080 | T | C | 0.35 | 6.51E-03 | 2.32E-02 | 1.89E-01 |
| rs4526799 | Brain_Anterior_cingulate_cortex_BA24 | 12 | <i>TMEM194A</i>      | 57465636 | rs11172047 | 0.9869 | 57298080 | T | C | 0.35 | 6.51E-03 | 5.92E-04 | 1.45E-01 |
| rs4526799 | Brain_Anterior_cingulate_cortex_BA24 | 12 | <i>INHBE</i>         | 57849584 | rs11172047 | 0.9869 | 57298080 | T | C | 0.35 | 6.51E-03 | 9.49E-04 | 1.47E-01 |
| rs4526799 | Brain_Anterior_cingulate_cortex_BA24 | 12 | <i>AVIL</i>          | 58201929 | rs11172047 | 0.9869 | 57298080 | T | C | 0.35 | 6.51E-03 | 2.30E-02 | 1.89E-01 |
| rs4526799 | Brain_Anterior_cingulate_cortex_BA24 | 12 | <i>MYL6</i>          | 56554355 | rs2371631  | 0.9869 | 57298614 | T | A | 0.35 | 6.32E-03 | 1.26E-02 | 1.73E-01 |
| rs4526799 | Brain_Anterior_cingulate_cortex_BA24 | 12 | <i>BAZ2A</i>         | 57009990 | rs2371631  | 0.9869 | 57298614 | T | A | 0.35 | 6.32E-03 | 2.32E-02 | 1.86E-01 |
| rs4526799 | Brain_Anterior_cingulate_cortex_BA24 | 12 | <i>TMEM194A</i>      | 57465636 | rs2371631  | 0.9869 | 57298614 | T | A | 0.35 | 6.32E-03 | 5.92E-04 | 1.41E-01 |
| rs4526799 | Brain_Anterior_cingulate_cortex_BA24 | 12 | <i>INHBE</i>         | 57849584 | rs2371631  | 0.9869 | 57298614 | T | A | 0.35 | 6.32E-03 | 9.49E-04 | 1.44E-01 |
| rs4526799 | Brain_Anterior_cingulate_cortex_BA24 | 12 | <i>AVIL</i>          | 58201929 | rs2371631  | 0.9869 | 57298614 | T | A | 0.35 | 6.32E-03 | 2.30E-02 | 1.85E-01 |
| rs4526799 | Brain_Anterior_cingulate_cortex_BA24 | 12 | <i>MYL6</i>          | 56554355 | rs12305763 | 0.9869 | 57299263 | G | A | 0.35 | 6.82E-03 | 1.26E-02 | 1.77E-01 |
| rs4526799 | Brain_Anterior_cingulate_cortex_BA24 | 12 | <i>BAZ2A</i>         | 57009990 | rs12305763 | 0.9869 | 57299263 | G | A | 0.35 | 6.82E-03 | 2.32E-02 | 1.90E-01 |
| rs4526799 | Brain_Anterior_cingulate_cortex_BA24 | 12 | <i>TMEM194A</i>      | 57465636 | rs12305763 | 0.9869 | 57299263 | G | A | 0.35 | 6.82E-03 | 5.92E-04 | 1.46E-01 |
| rs4526799 | Brain_Anterior_cingulate_cortex_BA24 | 12 | <i>INHBE</i>         | 57849584 | rs12305763 | 0.9869 | 57299263 | G | A | 0.35 | 6.82E-03 | 9.49E-04 | 1.49E-01 |
| rs4526799 | Brain_Anterior_cingulate_cortex_BA24 | 12 | <i>AVIL</i>          | 58201929 | rs12305763 | 0.9869 | 57299263 | G | A | 0.35 | 6.82E-03 | 2.30E-02 | 1.90E-01 |
| rs4526799 | Brain_Anterior_cingulate_cortex_BA24 | 12 | <i>MYL6</i>          | 56554355 | rs11172049 | 0.9128 | 57304203 | T | C | 0.35 | 1.15E-02 | 6.61E-03 | 1.67E-01 |
| rs4526799 | Brain_Anterior_cingulate_cortex_BA24 | 12 | <i>TMEM194A</i>      | 57465636 | rs11172049 | 0.9128 | 57304203 | T | C | 0.35 | 1.15E-02 | 2.64E-04 | 1.42E-01 |
| rs4526799 | Brain_Anterior_cingulate_cortex_BA24 | 12 | <i>INHBE</i>         | 57849584 | rs11172049 | 0.9128 | 57304203 | T | C | 0.35 | 1.15E-02 | 4.92E-04 | 1.45E-01 |
| rs4526799 | Brain_Anterior_cingulate_cortex_BA24 | 12 | <i>METTTL21B</i>     | 58170856 | rs11172049 | 0.9128 | 57304203 | T | C | 0.35 | 1.15E-02 | 4.78E-03 | 1.63E-01 |
| rs4526799 | Brain_Anterior_cingulate_cortex_BA24 | 12 | <i>RP11-571M6.17</i> | 58197909 | rs11172049 | 0.9128 | 57304203 | T | C | 0.35 | 1.15E-02 | 2.89E-02 | 1.96E-01 |
| rs4526799 | Brain_Anterior_cingulate_cortex_BA24 | 12 | <i>MYL6</i>          | 56554355 | rs1874888  | 0.9085 | 57305138 | A | C | 0.35 | 1.15E-02 | 6.61E-03 | 1.67E-01 |
| rs4526799 | Brain_Anterior_cingulate_cortex_BA24 | 12 | <i>TMEM194A</i>      | 57465636 | rs1874888  | 0.9085 | 57305138 | A | C | 0.35 | 1.15E-02 | 2.64E-04 | 1.42E-01 |
| rs4526799 | Brain_Anterior_cingulate_cortex_BA24 | 12 | <i>INHBE</i>         | 57849584 | rs1874888  | 0.9085 | 57305138 | A | C | 0.35 | 1.15E-02 | 4.92E-04 | 1.45E-01 |
| rs4526799 | Brain_Anterior_cingulate_cortex_BA24 | 12 | <i>METTTL21B</i>     | 58170856 | rs1874888  | 0.9085 | 57305138 | A | C | 0.35 | 1.15E-02 | 4.78E-03 | 1.63E-01 |
| rs4526799 | Brain_Anterior_cingulate_cortex_BA24 | 12 | <i>RP11-571M6.17</i> | 58197909 | rs1874888  | 0.9085 | 57305138 | A | C | 0.35 | 1.15E-02 | 2.89E-02 | 1.96E-01 |
| rs4526799 | Brain_Anterior_cingulate_cortex_BA24 | 12 | <i>MYL6</i>          | 56554355 | rs10506349 | 0.9128 | 57306412 | T | C | 0.37 | 1.10E-02 | 3.85E-03 | 1.51E-01 |
| rs4526799 | Brain_Anterior_cingulate_cortex_BA24 | 12 | <i>TMEM194A</i>      | 57465636 | rs10506349 | 0.9128 | 57306412 | T | C | 0.37 | 1.10E-02 | 5.00E-04 | 1.35E-01 |
| rs4526799 | Brain_Anterior_cingulate_cortex_BA24 | 12 | <i>INHBE</i>         | 57849584 | rs10506349 | 0.9128 | 57306412 | T | C | 0.37 | 1.10E-02 | 2.33E-04 | 1.31E-01 |
| rs4526799 | Brain_Anterior_cingulate_cortex_BA24 | 12 | <i>METTTL21B</i>     | 58170856 | rs10506349 | 0.9128 | 57306412 | T | C | 0.37 | 1.10E-02 | 2.21E-02 | 1.80E-01 |
| rs4526799 | Brain_Anterior_cingulate_cortex_BA24 | 12 | <i>RP11-571M6.17</i> | 58197909 | rs10506349 | 0.9128 | 57306412 | T | C | 0.37 | 1.10E-02 | 1.10E-02 | 1.65E-01 |
| rs4526799 | Brain_Anterior_cingulate_cortex_BA24 | 12 | <i>AVIL</i>          | 58201929 | rs10506349 | 0.9128 | 57306412 | T | C | 0.37 | 1.10E-02 | 4.03E-02 | 1.98E-01 |
| rs4526799 | Brain_Anterior_cingulate_cortex_BA24 | 12 | <i>MYL6</i>          | 56554355 | rs10876951 | 0.9085 | 57306430 | T | G | 0.35 | 1.15E-02 | 6.61E-03 | 1.67E-01 |
| rs4526799 | Brain_Anterior_cingulate_cortex_BA24 | 12 | <i>TMEM194A</i>      | 57465636 | rs10876951 | 0.9085 | 57306430 | T | G | 0.35 | 1.15E-02 | 2.64E-04 | 1.42E-01 |
| rs4526799 | Brain_Anterior_cingulate_cortex_BA24 | 12 | <i>INHBE</i>         | 57849584 | rs10876951 | 0.9085 | 57306430 | T | G | 0.35 | 1.15E-02 | 4.92E-04 | 1.45E-01 |
| rs4526799 | Brain_Anterior_cingulate_cortex_BA24 | 12 | <i>METTTL21B</i>     | 58170856 | rs10876951 | 0.9085 | 57306430 | T | G | 0.35 | 1.15E-02 | 4.78E-03 | 1.63E-01 |
| rs4526799 | Brain_Anterior_cingulate_cortex_BA24 | 12 | <i>RP11-571M6.17</i> | 58197909 | rs10876951 | 0.9085 | 57306430 | T | G | 0.35 | 1.15E-02 | 2.89E-02 | 1.96E-01 |
| rs4526799 | Brain_Anterior_cingulate_cortex_BA24 | 12 | <i>MYL6</i>          | 56554355 | rs10747774 | 0.9128 | 57307079 | T | C | 0.36 | 1.16E-02 | 3.85E-03 | 1.57E-01 |
| rs4526799 | Brain_Anterior_cingulate_cortex_BA24 | 12 | <i>TMEM194A</i>      | 57465636 | rs10747774 | 0.9128 | 57307079 | T | C | 0.36 | 1.16E-02 | 5.00E-04 | 1.41E-01 |

|           |                                      |    |                      |          |            |        |          |   |   |      |          |          |          |
|-----------|--------------------------------------|----|----------------------|----------|------------|--------|----------|---|---|------|----------|----------|----------|
| rs4526799 | Brain_Anterior_cingulate_cortex_BA24 | 12 | <i>INHBE</i>         | 57849584 | rs10747774 | 0.9128 | 57307079 | T | C | 0.36 | 1.16E-02 | 2.33E-04 | 1.37E-01 |
| rs4526799 | Brain_Anterior_cingulate_cortex_BA24 | 12 | <i>METTL21B</i>      | 58170856 | rs10747774 | 0.9128 | 57307079 | T | C | 0.36 | 1.16E-02 | 2.21E-02 | 1.85E-01 |
| rs4526799 | Brain_Anterior_cingulate_cortex_BA24 | 12 | <i>RP11-571M6.17</i> | 58197909 | rs10747774 | 0.9128 | 57307079 | T | C | 0.36 | 1.16E-02 | 1.10E-02 | 1.71E-01 |
| rs4526799 | Brain_Anterior_cingulate_cortex_BA24 | 12 | <i>AVIL</i>          | 58201929 | rs10747774 | 0.9128 | 57307079 | T | C | 0.36 | 1.16E-02 | 4.03E-02 | 2.03E-01 |
| rs4526799 | Brain_Anterior_cingulate_cortex_BA24 | 12 | <i>MYL6</i>          | 56554355 | rs10783812 | 0.9085 | 57308723 | C | T | 0.35 | 1.19E-02 | 5.76E-03 | 1.69E-01 |
| rs4526799 | Brain_Anterior_cingulate_cortex_BA24 | 12 | <i>TMEM194A</i>      | 57465636 | rs10783812 | 0.9085 | 57308723 | C | T | 0.35 | 1.19E-02 | 2.81E-04 | 1.46E-01 |
| rs4526799 | Brain_Anterior_cingulate_cortex_BA24 | 12 | <i>INHBE</i>         | 57849584 | rs10783812 | 0.9085 | 57308723 | C | T | 0.35 | 1.19E-02 | 3.50E-04 | 1.47E-01 |
| rs4526799 | Brain_Anterior_cingulate_cortex_BA24 | 12 | <i>METTL21B</i>      | 58170856 | rs10783812 | 0.9085 | 57308723 | C | T | 0.35 | 1.19E-02 | 5.07E-03 | 1.67E-01 |
| rs4526799 | Brain_Anterior_cingulate_cortex_BA24 | 12 | <i>RP11-571M6.17</i> | 58197909 | rs10783812 | 0.9085 | 57308723 | C | T | 0.35 | 1.19E-02 | 2.62E-02 | 1.96E-01 |
| rs4526799 | Brain_Anterior_cingulate_cortex_BA24 | 12 | <i>MYL6</i>          | 56554355 | rs11172056 | 0.9089 | 57308975 | C | T | 0.37 | 1.10E-02 | 3.85E-03 | 1.51E-01 |
| rs4526799 | Brain_Anterior_cingulate_cortex_BA24 | 12 | <i>TMEM194A</i>      | 57465636 | rs11172056 | 0.9089 | 57308975 | C | T | 0.37 | 1.10E-02 | 5.00E-04 | 1.35E-01 |
| rs4526799 | Brain_Anterior_cingulate_cortex_BA24 | 12 | <i>INHBE</i>         | 57849584 | rs11172056 | 0.9089 | 57308975 | C | T | 0.37 | 1.10E-02 | 2.33E-04 | 1.31E-01 |
| rs4526799 | Brain_Anterior_cingulate_cortex_BA24 | 12 | <i>METTL21B</i>      | 58170856 | rs11172056 | 0.9089 | 57308975 | C | T | 0.37 | 1.10E-02 | 2.21E-02 | 1.80E-01 |
| rs4526799 | Brain_Anterior_cingulate_cortex_BA24 | 12 | <i>RP11-571M6.17</i> | 58197909 | rs11172056 | 0.9089 | 57308975 | C | T | 0.37 | 1.10E-02 | 1.10E-02 | 1.66E-01 |
| rs4526799 | Brain_Anterior_cingulate_cortex_BA24 | 12 | <i>AVIL</i>          | 58201929 | rs11172056 | 0.9089 | 57308975 | C | T | 0.37 | 1.10E-02 | 4.03E-02 | 1.98E-01 |
| rs4526799 | Brain_Anterior_cingulate_cortex_BA24 | 12 | <i>MYL6</i>          | 56554355 | rs7302420  | 0.9085 | 57309884 | G | C | 0.36 | 1.54E-02 | 4.31E-03 | 1.83E-01 |
| rs4526799 | Brain_Anterior_cingulate_cortex_BA24 | 12 | <i>TMEM194A</i>      | 57465636 | rs7302420  | 0.9085 | 57309884 | G | C | 0.36 | 1.54E-02 | 2.85E-04 | 1.64E-01 |
| rs4526799 | Brain_Anterior_cingulate_cortex_BA24 | 12 | <i>INHBE</i>         | 57849584 | rs7302420  | 0.9085 | 57309884 | G | C | 0.36 | 1.54E-02 | 6.95E-04 | 1.69E-01 |
| rs4526799 | Brain_Anterior_cingulate_cortex_BA24 | 12 | <i>METTL21B</i>      | 58170856 | rs7302420  | 0.9085 | 57309884 | G | C | 0.36 | 1.54E-02 | 5.46E-03 | 1.85E-01 |
| rs4526799 | Brain_Anterior_cingulate_cortex_BA24 | 12 | <i>RP11-571M6.17</i> | 58197909 | rs7302420  | 0.9085 | 57309884 | G | C | 0.36 | 1.54E-02 | 3.33E-02 | 2.19E-01 |
| rs4526799 | Brain_Anterior_cingulate_cortex_BA24 | 12 | <i>AVIL</i>          | 58201929 | rs7302420  | 0.9085 | 57309884 | G | C | 0.36 | 1.54E-02 | 4.28E-02 | 2.27E-01 |
| rs4526799 | Brain_Anterior_cingulate_cortex_BA24 | 12 | <i>MYL6</i>          | 56554355 | rs12228618 | 0.9128 | 57311229 | T | C | 0.37 | 1.29E-02 | 6.64E-03 | 1.67E-01 |
| rs4526799 | Brain_Anterior_cingulate_cortex_BA24 | 12 | <i>TMEM194A</i>      | 57465636 | rs12228618 | 0.9128 | 57311229 | T | C | 0.37 | 1.29E-02 | 1.51E-03 | 1.52E-01 |
| rs4526799 | Brain_Anterior_cingulate_cortex_BA24 | 12 | <i>INHBE</i>         | 57849584 | rs12228618 | 0.9128 | 57311229 | T | C | 0.37 | 1.29E-02 | 1.70E-03 | 1.53E-01 |
| rs4526799 | Brain_Anterior_cingulate_cortex_BA24 | 12 | <i>ARHGAP9</i>       | 57874321 | rs12228618 | 0.9128 | 57311229 | T | C | 0.37 | 1.29E-02 | 4.75E-02 | 2.12E-01 |
| rs4526799 | Brain_Anterior_cingulate_cortex_BA24 | 12 | <i>RP11-571M6.17</i> | 58197909 | rs12228618 | 0.9128 | 57311229 | T | C | 0.37 | 1.29E-02 | 1.00E-02 | 1.73E-01 |
| rs4526799 | Brain_Anterior_cingulate_cortex_BA24 | 12 | <i>AVIL</i>          | 58201929 | rs12228618 | 0.9128 | 57311229 | T | C | 0.37 | 1.29E-02 | 4.95E-02 | 2.14E-01 |
| rs4526799 | Brain_Anterior_cingulate_cortex_BA24 | 12 | <i>MYL6</i>          | 56554355 | rs9739473  | 0.9012 | 57313335 | A | T | 0.37 | 2.65E-02 | 6.77E-03 | 2.40E-01 |
| rs4526799 | Brain_Anterior_cingulate_cortex_BA24 | 12 | <i>TMEM194A</i>      | 57465636 | rs9739473  | 0.9012 | 57313335 | A | T | 0.37 | 2.65E-02 | 6.60E-04 | 2.24E-01 |
| rs4526799 | Brain_Anterior_cingulate_cortex_BA24 | 12 | <i>INHBE</i>         | 57849584 | rs9739473  | 0.9012 | 57313335 | A | T | 0.37 | 2.65E-02 | 3.40E-04 | 2.21E-01 |
| rs4526799 | Brain_Anterior_cingulate_cortex_BA24 | 12 | <i>METTL21B</i>      | 58170856 | rs9739473  | 0.9012 | 57313335 | A | T | 0.37 | 2.65E-02 | 4.59E-02 | 2.75E-01 |
| rs4526799 | Brain_Anterior_cingulate_cortex_BA24 | 12 | <i>RP11-571M6.17</i> | 58197909 | rs9739473  | 0.9012 | 57313335 | A | T | 0.37 | 2.65E-02 | 7.24E-03 | 2.41E-01 |
| rs4526799 | Brain_Anterior_cingulate_cortex_BA24 | 12 | <i>AVIL</i>          | 58201929 | rs9739473  | 0.9012 | 57313335 | A | T | 0.37 | 2.65E-02 | 3.24E-02 | 2.66E-01 |
| rs4526799 | Brain_Caudate_basal_ganglia          | 12 | <i>RPS26</i>         | 56436876 | rs9919772  | 0.8450 | 57260027 | T | C | 0.33 | 1.03E-02 | 1.08E-02 | 1.98E-01 |
| rs4526799 | Brain_Caudate_basal_ganglia          | 12 | <i>PA2G4</i>         | 56502897 | rs9919772  | 0.8450 | 57260027 | T | C | 0.33 | 1.03E-02 | 2.91E-02 | 2.19E-01 |
| rs4526799 | Brain_Caudate_basal_ganglia          | 12 | <i>RP11-603J24.5</i> | 56518610 | rs9919772  | 0.8450 | 57260027 | T | C | 0.33 | 1.03E-02 | 1.41E-02 | 2.03E-01 |
| rs4526799 | Brain_Caudate_basal_ganglia          | 12 | <i>ANKRD52</i>       | 56641903 | rs9919772  | 0.8450 | 57260027 | T | C | 0.33 | 1.03E-02 | 1.65E-02 | 2.06E-01 |
| rs4526799 | Brain_Caudate_basal_ganglia          | 12 | <i>COQ10A</i>        | 56662696 | rs9919772  | 0.8450 | 57260027 | T | C | 0.33 | 1.03E-02 | 1.28E-02 | 2.01E-01 |
| rs4526799 | Brain_Caudate_basal_ganglia          | 12 | <i>IL23A</i>         | 56733428 | rs9919772  | 0.8450 | 57260027 | T | C | 0.33 | 1.03E-02 | 1.23E-02 | 2.01E-01 |
| rs4526799 | Brain_Caudate_basal_ganglia          | 12 | <i>RN7SL809P</i>     | 57064383 | rs9919772  | 0.8450 | 57260027 | T | C | 0.33 | 1.03E-02 | 3.37E-02 | 2.23E-01 |

|           |                             |    |                      |          |            |        |          |   |   |      |          |          |          |
|-----------|-----------------------------|----|----------------------|----------|------------|--------|----------|---|---|------|----------|----------|----------|
| rs4526799 | Brain_Caudate_basal_ganglia | 12 | <i>HSD17B6</i>       | 57163759 | rs9919772  | 0.8450 | 57260027 | T | C | 0.33 | 1.03E-02 | 2.88E-02 | 2.18E-01 |
| rs4526799 | Brain_Caudate_basal_ganglia | 12 | <i>RP11-74M13.4</i>  | 57242410 | rs9919772  | 0.8450 | 57260027 | T | C | 0.33 | 1.03E-02 | 3.87E-02 | 2.27E-01 |
| rs4526799 | Brain_Caudate_basal_ganglia | 12 | <i>AGAP2-AS1</i>     | 58121424 | rs9919772  | 0.8450 | 57260027 | T | C | 0.33 | 1.03E-02 | 4.81E-02 | 2.34E-01 |
| rs4526799 | Brain_Caudate_basal_ganglia | 12 | <i>RPS26</i>         | 56436876 | rs4495925  | 0.8650 | 57268116 | C | G | 0.33 | 1.04E-02 | 3.15E-03 | 1.80E-01 |
| rs4526799 | Brain_Caudate_basal_ganglia | 12 | <i>PA2G4</i>         | 56502897 | rs4495925  | 0.8650 | 57268116 | C | G | 0.33 | 1.04E-02 | 2.88E-02 | 2.15E-01 |
| rs4526799 | Brain_Caudate_basal_ganglia | 12 | <i>RP11-603J24.5</i> | 56518610 | rs4495925  | 0.8650 | 57268116 | C | G | 0.33 | 1.04E-02 | 3.20E-02 | 2.18E-01 |
| rs4526799 | Brain_Caudate_basal_ganglia | 12 | <i>ANKRD52</i>       | 56641903 | rs4495925  | 0.8650 | 57268116 | C | G | 0.33 | 1.04E-02 | 4.21E-02 | 2.27E-01 |
| rs4526799 | Brain_Caudate_basal_ganglia | 12 | <i>COQ10A</i>        | 56662696 | rs4495925  | 0.8650 | 57268116 | C | G | 0.33 | 1.04E-02 | 1.39E-02 | 2.00E-01 |
| rs4526799 | Brain_Caudate_basal_ganglia | 12 | <i>IL23A</i>         | 56733428 | rs4495925  | 0.8650 | 57268116 | C | G | 0.33 | 1.04E-02 | 1.40E-02 | 2.00E-01 |
| rs4526799 | Brain_Caudate_basal_ganglia | 12 | <i>RN7SL809P</i>     | 57064383 | rs4495925  | 0.8650 | 57268116 | C | G | 0.33 | 1.04E-02 | 1.76E-02 | 2.04E-01 |
| rs4526799 | Brain_Caudate_basal_ganglia | 12 | <i>HSD17B6</i>       | 57163759 | rs4495925  | 0.8650 | 57268116 | C | G | 0.33 | 1.04E-02 | 2.68E-02 | 2.14E-01 |
| rs4526799 | Brain_Caudate_basal_ganglia | 12 | <i>RPS26</i>         | 56436876 | rs4471472  | 0.8650 | 57268985 | A | G | 0.32 | 9.99E-03 | 3.67E-03 | 1.78E-01 |
| rs4526799 | Brain_Caudate_basal_ganglia | 12 | <i>PA2G4</i>         | 56502897 | rs4471472  | 0.8650 | 57268985 | A | G | 0.32 | 9.99E-03 | 2.64E-02 | 2.09E-01 |
| rs4526799 | Brain_Caudate_basal_ganglia | 12 | <i>RP11-603J24.5</i> | 56518610 | rs4471472  | 0.8650 | 57268985 | A | G | 0.32 | 9.99E-03 | 2.73E-02 | 2.10E-01 |
| rs4526799 | Brain_Caudate_basal_ganglia | 12 | <i>ANKRD52</i>       | 56641903 | rs4471472  | 0.8650 | 57268985 | A | G | 0.32 | 9.99E-03 | 4.08E-02 | 2.22E-01 |
| rs4526799 | Brain_Caudate_basal_ganglia | 12 | <i>COQ10A</i>        | 56662696 | rs4471472  | 0.8650 | 57268985 | A | G | 0.32 | 9.99E-03 | 1.25E-02 | 1.94E-01 |
| rs4526799 | Brain_Caudate_basal_ganglia | 12 | <i>IL23A</i>         | 56733428 | rs4471472  | 0.8650 | 57268985 | A | G | 0.32 | 9.99E-03 | 1.14E-02 | 1.92E-01 |
| rs4526799 | Brain_Caudate_basal_ganglia | 12 | <i>RN7SL809P</i>     | 57064383 | rs4471472  | 0.8650 | 57268985 | A | G | 0.32 | 9.99E-03 | 2.06E-02 | 2.03E-01 |
| rs4526799 | Brain_Caudate_basal_ganglia | 12 | <i>HSD17B6</i>       | 57163759 | rs4471472  | 0.8650 | 57268985 | A | G | 0.32 | 9.99E-03 | 3.11E-02 | 2.14E-01 |
| rs4526799 | Brain_Caudate_basal_ganglia | 12 | <i>RPS26</i>         | 56436876 | rs4633499  | 0.8610 | 57269264 | A | T | 0.32 | 1.43E-02 | 3.70E-03 | 2.16E-01 |
| rs4526799 | Brain_Caudate_basal_ganglia | 12 | <i>PA2G4</i>         | 56502897 | rs4633499  | 0.8610 | 57269264 | A | T | 0.32 | 1.43E-02 | 1.59E-02 | 2.34E-01 |
| rs4526799 | Brain_Caudate_basal_ganglia | 12 | <i>RP11-603J24.5</i> | 56518610 | rs4633499  | 0.8610 | 57269264 | A | T | 0.32 | 1.43E-02 | 3.09E-02 | 2.48E-01 |
| rs4526799 | Brain_Caudate_basal_ganglia | 12 | <i>ANKRD52</i>       | 56641903 | rs4633499  | 0.8610 | 57269264 | A | T | 0.32 | 1.43E-02 | 3.46E-02 | 2.51E-01 |
| rs4526799 | Brain_Caudate_basal_ganglia | 12 | <i>COQ10A</i>        | 56662696 | rs4633499  | 0.8610 | 57269264 | A | T | 0.32 | 1.43E-02 | 1.33E-02 | 2.31E-01 |
| rs4526799 | Brain_Caudate_basal_ganglia | 12 | <i>IL23A</i>         | 56733428 | rs4633499  | 0.8610 | 57269264 | A | T | 0.32 | 1.43E-02 | 8.46E-03 | 2.25E-01 |
| rs4526799 | Brain_Caudate_basal_ganglia | 12 | <i>RN7SL809P</i>     | 57064383 | rs4633499  | 0.8610 | 57269264 | A | T | 0.32 | 1.43E-02 | 3.03E-02 | 2.47E-01 |
| rs4526799 | Brain_Caudate_basal_ganglia | 12 | <i>HSD17B6</i>       | 57163759 | rs4633499  | 0.8610 | 57269264 | A | T | 0.32 | 1.43E-02 | 2.51E-02 | 2.43E-01 |
| rs4526799 | Brain_Caudate_basal_ganglia | 12 | <i>RP11-74M13.4</i>  | 57242410 | rs4633499  | 0.8610 | 57269264 | A | T | 0.32 | 1.43E-02 | 4.97E-02 | 2.62E-01 |
| rs4526799 | Brain_Caudate_basal_ganglia | 12 | <i>PA2G4</i>         | 56502897 | rs12300079 | 0.9956 | 57273194 | T | C | 0.36 | 3.73E-03 | 1.52E-02 | 1.47E-01 |
| rs4526799 | Brain_Caudate_basal_ganglia | 12 | <i>COQ10A</i>        | 56662696 | rs12300079 | 0.9956 | 57273194 | T | C | 0.36 | 3.73E-03 | 3.05E-02 | 1.65E-01 |
| rs4526799 | Brain_Caudate_basal_ganglia | 12 | <i>IL23A</i>         | 56733428 | rs12300079 | 0.9956 | 57273194 | T | C | 0.36 | 3.73E-03 | 1.41E-02 | 1.45E-01 |
| rs4526799 | Brain_Caudate_basal_ganglia | 12 | <i>RP11-74M13.4</i>  | 57242410 | rs12300079 | 0.9956 | 57273194 | T | C | 0.36 | 3.73E-03 | 1.44E-02 | 1.46E-01 |
| rs4526799 | Brain_Caudate_basal_ganglia | 12 | <i>MYO1A</i>         | 57433641 | rs12300079 | 0.9956 | 57273194 | T | C | 0.36 | 3.73E-03 | 2.36E-02 | 1.57E-01 |
| rs4526799 | Brain_Caudate_basal_ganglia | 12 | <i>PA2G4</i>         | 56502897 | rs12300191 | 0.9956 | 57273289 | A | G | 0.36 | 3.59E-03 | 1.56E-02 | 1.45E-01 |
| rs4526799 | Brain_Caudate_basal_ganglia | 12 | <i>COQ10A</i>        | 56662696 | rs12300191 | 0.9956 | 57273289 | A | G | 0.36 | 3.59E-03 | 2.82E-02 | 1.60E-01 |
| rs4526799 | Brain_Caudate_basal_ganglia | 12 | <i>IL23A</i>         | 56733428 | rs12300191 | 0.9956 | 57273289 | A | G | 0.36 | 3.59E-03 | 1.34E-02 | 1.42E-01 |
| rs4526799 | Brain_Caudate_basal_ganglia | 12 | <i>RP11-74M13.4</i>  | 57242410 | rs12300191 | 0.9956 | 57273289 | A | G | 0.36 | 3.59E-03 | 1.97E-02 | 1.50E-01 |
| rs4526799 | Brain_Caudate_basal_ganglia | 12 | <i>MYO1A</i>         | 57433641 | rs12300191 | 0.9956 | 57273289 | A | G | 0.36 | 3.59E-03 | 1.86E-02 | 1.49E-01 |
| rs4526799 | Brain_Caudate_basal_ganglia | 12 | <i>PA2G4</i>         | 56502897 | rs4514464  | 0.9956 | 57276375 | C | T | 0.36 | 2.92E-03 | 1.56E-02 | 1.42E-01 |
| rs4526799 | Brain_Caudate_basal_ganglia | 12 | <i>COQ10A</i>        | 56662696 | rs4514464  | 0.9956 | 57276375 | C | T | 0.36 | 2.92E-03 | 2.82E-02 | 1.57E-01 |

|           |                             |    |              |          |            |        |          |   |   |      |          |          |          |
|-----------|-----------------------------|----|--------------|----------|------------|--------|----------|---|---|------|----------|----------|----------|
| rs4526799 | Brain_Caudate_basal_ganglia | 12 | IL23A        | 56733428 | rs4514464  | 0.9956 | 57276375 | C | T | 0.36 | 2.92E-03 | 1.34E-02 | 1.38E-01 |
| rs4526799 | Brain_Caudate_basal_ganglia | 12 | RP11-74M13.4 | 57242410 | rs4514464  | 0.9956 | 57276375 | C | T | 0.36 | 2.92E-03 | 1.97E-02 | 1.47E-01 |
| rs4526799 | Brain_Caudate_basal_ganglia | 12 | MYO1A        | 57433641 | rs4514464  | 0.9956 | 57276375 | C | T | 0.36 | 2.92E-03 | 1.86E-02 | 1.46E-01 |
| rs4526799 | Brain_Caudate_basal_ganglia | 12 | PA2G4        | 56502897 | rs4417325  | 0.9956 | 57277302 | G | A | 0.36 | 3.59E-03 | 1.56E-02 | 1.45E-01 |
| rs4526799 | Brain_Caudate_basal_ganglia | 12 | COQ10A       | 56662696 | rs4417325  | 0.9956 | 57277302 | G | A | 0.36 | 3.59E-03 | 2.82E-02 | 1.60E-01 |
| rs4526799 | Brain_Caudate_basal_ganglia | 12 | IL23A        | 56733428 | rs4417325  | 0.9956 | 57277302 | G | A | 0.36 | 3.59E-03 | 1.34E-02 | 1.42E-01 |
| rs4526799 | Brain_Caudate_basal_ganglia | 12 | RP11-74M13.4 | 57242410 | rs4417325  | 0.9956 | 57277302 | G | A | 0.36 | 3.59E-03 | 1.97E-02 | 1.50E-01 |
| rs4526799 | Brain_Caudate_basal_ganglia | 12 | MYO1A        | 57433641 | rs4417325  | 0.9956 | 57277302 | G | A | 0.36 | 3.59E-03 | 1.86E-02 | 1.49E-01 |
| rs4526799 | Brain_Caudate_basal_ganglia | 12 | PA2G4        | 56502897 | rs11172030 | 0.9956 | 57278076 | A | C | 0.36 | 3.63E-03 | 1.56E-02 | 1.45E-01 |
| rs4526799 | Brain_Caudate_basal_ganglia | 12 | COQ10A       | 56662696 | rs11172030 | 0.9956 | 57278076 | A | C | 0.36 | 3.63E-03 | 2.82E-02 | 1.61E-01 |
| rs4526799 | Brain_Caudate_basal_ganglia | 12 | IL23A        | 56733428 | rs11172030 | 0.9956 | 57278076 | A | C | 0.36 | 3.63E-03 | 1.34E-02 | 1.42E-01 |
| rs4526799 | Brain_Caudate_basal_ganglia | 12 | RP11-74M13.4 | 57242410 | rs11172030 | 0.9956 | 57278076 | A | C | 0.36 | 3.63E-03 | 1.97E-02 | 1.51E-01 |
| rs4526799 | Brain_Caudate_basal_ganglia | 12 | MYO1A        | 57433641 | rs11172030 | 0.9956 | 57278076 | A | C | 0.36 | 3.63E-03 | 1.86E-02 | 1.49E-01 |
| rs4526799 | Brain_Caudate_basal_ganglia | 12 | PA2G4        | 56502897 | rs10876944 | 0.9956 | 57279372 | T | A | 0.36 | 3.63E-03 | 1.56E-02 | 1.45E-01 |
| rs4526799 | Brain_Caudate_basal_ganglia | 12 | COQ10A       | 56662696 | rs10876944 | 0.9956 | 57279372 | T | A | 0.36 | 3.63E-03 | 2.82E-02 | 1.61E-01 |
| rs4526799 | Brain_Caudate_basal_ganglia | 12 | IL23A        | 56733428 | rs10876944 | 0.9956 | 57279372 | T | A | 0.36 | 3.63E-03 | 1.34E-02 | 1.42E-01 |
| rs4526799 | Brain_Caudate_basal_ganglia | 12 | RP11-74M13.4 | 57242410 | rs10876944 | 0.9956 | 57279372 | T | A | 0.36 | 3.63E-03 | 1.97E-02 | 1.51E-01 |
| rs4526799 | Brain_Caudate_basal_ganglia | 12 | MYO1A        | 57433641 | rs10876944 | 0.9956 | 57279372 | T | A | 0.36 | 3.63E-03 | 1.86E-02 | 1.49E-01 |
| rs4526799 | Brain_Caudate_basal_ganglia | 12 | PA2G4        | 56502897 | rs4326839  | 0.9956 | 57280374 | G | C | 0.36 | 3.58E-03 | 1.56E-02 | 1.45E-01 |
| rs4526799 | Brain_Caudate_basal_ganglia | 12 | COQ10A       | 56662696 | rs4326839  | 0.9956 | 57280374 | G | C | 0.36 | 3.58E-03 | 2.82E-02 | 1.60E-01 |
| rs4526799 | Brain_Caudate_basal_ganglia | 12 | IL23A        | 56733428 | rs4326839  | 0.9956 | 57280374 | G | C | 0.36 | 3.58E-03 | 1.34E-02 | 1.42E-01 |
| rs4526799 | Brain_Caudate_basal_ganglia | 12 | RP11-74M13.4 | 57242410 | rs4326839  | 0.9956 | 57280374 | G | C | 0.36 | 3.58E-03 | 1.97E-02 | 1.50E-01 |
| rs4526799 | Brain_Caudate_basal_ganglia | 12 | MYO1A        | 57433641 | rs4326839  | 0.9956 | 57280374 | G | C | 0.36 | 3.58E-03 | 1.86E-02 | 1.49E-01 |
| rs4526799 | Brain_Caudate_basal_ganglia | 12 | PA2G4        | 56502897 | rs4526799  | 1.0000 | 57280586 | T | C | 0.34 | 7.26E-06 | 1.56E-02 | 4.56E-02 |
| rs4526799 | Brain_Caudate_basal_ganglia | 12 | COQ10A       | 56662696 | rs4526799  | 1.0000 | 57280586 | T | C | 0.34 | 7.26E-06 | 2.82E-02 | 6.19E-02 |
| rs4526799 | Brain_Caudate_basal_ganglia | 12 | IL23A        | 56733428 | rs4526799  | 1.0000 | 57280586 | T | C | 0.34 | 7.26E-06 | 1.34E-02 | 4.24E-02 |
| rs4526799 | Brain_Caudate_basal_ganglia | 12 | RP11-74M13.4 | 57242410 | rs4526799  | 1.0000 | 57280586 | T | C | 0.34 | 7.26E-06 | 1.97E-02 | 5.12E-02 |
| rs4526799 | Brain_Caudate_basal_ganglia | 12 | MYO1A        | 57433641 | rs4526799  | 1.0000 | 57280586 | T | C | 0.34 | 7.26E-06 | 1.86E-02 | 4.97E-02 |
| rs4526799 | Brain_Caudate_basal_ganglia | 12 | PA2G4        | 56502897 | rs28876529 | 0.9956 | 57285301 | T | A | 0.36 | 2.25E-03 | 1.56E-02 | 1.29E-01 |
| rs4526799 | Brain_Caudate_basal_ganglia | 12 | COQ10A       | 56662696 | rs28876529 | 0.9956 | 57285301 | T | A | 0.36 | 2.25E-03 | 2.82E-02 | 1.45E-01 |
| rs4526799 | Brain_Caudate_basal_ganglia | 12 | IL23A        | 56733428 | rs28876529 | 0.9956 | 57285301 | T | A | 0.36 | 2.25E-03 | 1.34E-02 | 1.26E-01 |
| rs4526799 | Brain_Caudate_basal_ganglia | 12 | RP11-74M13.4 | 57242410 | rs28876529 | 0.9956 | 57285301 | T | A | 0.36 | 2.25E-03 | 1.97E-02 | 1.35E-01 |
| rs4526799 | Brain_Caudate_basal_ganglia | 12 | MYO1A        | 57433641 | rs28876529 | 0.9956 | 57285301 | T | A | 0.36 | 2.25E-03 | 1.86E-02 | 1.33E-01 |
| rs4526799 | Brain_Caudate_basal_ganglia | 12 | PA2G4        | 56502897 | rs11172037 | 0.9956 | 57285427 | T | A | 0.36 | 2.25E-03 | 1.56E-02 | 1.29E-01 |
| rs4526799 | Brain_Caudate_basal_ganglia | 12 | COQ10A       | 56662696 | rs11172037 | 0.9956 | 57285427 | T | A | 0.36 | 2.25E-03 | 2.82E-02 | 1.45E-01 |
| rs4526799 | Brain_Caudate_basal_ganglia | 12 | IL23A        | 56733428 | rs11172037 | 0.9956 | 57285427 | T | A | 0.36 | 2.25E-03 | 1.34E-02 | 1.26E-01 |
| rs4526799 | Brain_Caudate_basal_ganglia | 12 | RP11-74M13.4 | 57242410 | rs11172037 | 0.9956 | 57285427 | T | A | 0.36 | 2.25E-03 | 1.97E-02 | 1.35E-01 |
| rs4526799 | Brain_Caudate_basal_ganglia | 12 | MYO1A        | 57433641 | rs11172037 | 0.9956 | 57285427 | T | A | 0.36 | 2.25E-03 | 1.86E-02 | 1.33E-01 |
| rs4526799 | Brain_Caudate_basal_ganglia | 12 | PA2G4        | 56502897 | rs12321987 | 0.9956 | 57288449 | G | A | 0.36 | 4.47E-03 | 1.56E-02 | 1.67E-01 |
| rs4526799 | Brain_Caudate_basal_ganglia | 12 | COQ10A       | 56662696 | rs12321987 | 0.9956 | 57288449 | G | A | 0.36 | 4.47E-03 | 2.82E-02 | 1.82E-01 |

|           |                             |    |              |          |            |        |          |   |   |      |          |          |          |
|-----------|-----------------------------|----|--------------|----------|------------|--------|----------|---|---|------|----------|----------|----------|
| rs4526799 | Brain_Caudate_basal_ganglia | 12 | IL23A        | 56733428 | rs12321987 | 0.9956 | 57288449 | G | A | 0.36 | 4.47E-03 | 1.34E-02 | 1.64E-01 |
| rs4526799 | Brain_Caudate_basal_ganglia | 12 | RP11-74M13.4 | 57242410 | rs12321987 | 0.9956 | 57288449 | G | A | 0.36 | 4.47E-03 | 1.97E-02 | 1.72E-01 |
| rs4526799 | Brain_Caudate_basal_ganglia | 12 | MYO1A        | 57433641 | rs12321987 | 0.9956 | 57288449 | G | A | 0.36 | 4.47E-03 | 1.86E-02 | 1.71E-01 |
| rs4526799 | Brain_Caudate_basal_ganglia | 12 | IL23A        | 56733428 | rs11172043 | 0.9869 | 57293182 | G | A | 0.35 | 4.58E-03 | 3.00E-02 | 1.82E-01 |
| rs4526799 | Brain_Caudate_basal_ganglia | 12 | HSD17B6      | 57163759 | rs11172043 | 0.9869 | 57293182 | G | A | 0.35 | 4.58E-03 | 2.99E-02 | 1.82E-01 |
| rs4526799 | Brain_Caudate_basal_ganglia | 12 | RP11-74M13.4 | 57242410 | rs11172043 | 0.9869 | 57293182 | G | A | 0.35 | 4.58E-03 | 3.02E-02 | 1.82E-01 |
| rs4526799 | Brain_Caudate_basal_ganglia | 12 | IL23A        | 56733428 | rs12426816 | 0.9869 | 57294074 | A | C | 0.35 | 4.50E-03 | 3.00E-02 | 1.82E-01 |
| rs4526799 | Brain_Caudate_basal_ganglia | 12 | HSD17B6      | 57163759 | rs12426816 | 0.9869 | 57294074 | A | C | 0.35 | 4.50E-03 | 2.99E-02 | 1.82E-01 |
| rs4526799 | Brain_Caudate_basal_ganglia | 12 | RP11-74M13.4 | 57242410 | rs12426816 | 0.9869 | 57294074 | A | C | 0.35 | 4.50E-03 | 3.02E-02 | 1.82E-01 |
| rs4526799 | Brain_Caudate_basal_ganglia | 12 | IL23A        | 56733428 | rs11172047 | 0.9869 | 57298080 | T | C | 0.35 | 6.51E-03 | 3.00E-02 | 1.96E-01 |
| rs4526799 | Brain_Caudate_basal_ganglia | 12 | HSD17B6      | 57163759 | rs11172047 | 0.9869 | 57298080 | T | C | 0.35 | 6.51E-03 | 2.99E-02 | 1.96E-01 |
| rs4526799 | Brain_Caudate_basal_ganglia | 12 | RP11-74M13.4 | 57242410 | rs11172047 | 0.9869 | 57298080 | T | C | 0.35 | 6.51E-03 | 3.02E-02 | 1.96E-01 |
| rs4526799 | Brain_Caudate_basal_ganglia | 12 | IL23A        | 56733428 | rs2371631  | 0.9869 | 57298614 | T | A | 0.35 | 6.32E-03 | 3.00E-02 | 1.93E-01 |
| rs4526799 | Brain_Caudate_basal_ganglia | 12 | HSD17B6      | 57163759 | rs2371631  | 0.9869 | 57298614 | T | A | 0.35 | 6.32E-03 | 2.99E-02 | 1.93E-01 |
| rs4526799 | Brain_Caudate_basal_ganglia | 12 | RP11-74M13.4 | 57242410 | rs2371631  | 0.9869 | 57298614 | T | A | 0.35 | 6.32E-03 | 3.02E-02 | 1.93E-01 |
| rs4526799 | Brain_Caudate_basal_ganglia | 12 | IL23A        | 56733428 | rs12305763 | 0.9869 | 57299263 | G | A | 0.35 | 6.82E-03 | 3.00E-02 | 1.97E-01 |
| rs4526799 | Brain_Caudate_basal_ganglia | 12 | HSD17B6      | 57163759 | rs12305763 | 0.9869 | 57299263 | G | A | 0.35 | 6.82E-03 | 2.99E-02 | 1.97E-01 |
| rs4526799 | Brain_Caudate_basal_ganglia | 12 | RP11-74M13.4 | 57242410 | rs12305763 | 0.9869 | 57299263 | G | A | 0.35 | 6.82E-03 | 3.02E-02 | 1.97E-01 |
| rs4526799 | Brain_Caudate_basal_ganglia | 12 | PA2G4        | 56502897 | rs11172049 | 0.9128 | 57304203 | T | C | 0.35 | 1.15E-02 | 3.58E-02 | 2.03E-01 |
| rs4526799 | Brain_Caudate_basal_ganglia | 12 | IL23A        | 56733428 | rs11172049 | 0.9128 | 57304203 | T | C | 0.35 | 1.15E-02 | 3.21E-02 | 1.99E-01 |
| rs4526799 | Brain_Caudate_basal_ganglia | 12 | RP11-74M13.4 | 57242410 | rs11172049 | 0.9128 | 57304203 | T | C | 0.35 | 1.15E-02 | 2.40E-02 | 1.91E-01 |
| rs4526799 | Brain_Caudate_basal_ganglia | 12 | PA2G4        | 56502897 | rs1874888  | 0.9085 | 57305138 | A | C | 0.35 | 1.15E-02 | 3.58E-02 | 2.03E-01 |
| rs4526799 | Brain_Caudate_basal_ganglia | 12 | IL23A        | 56733428 | rs1874888  | 0.9085 | 57305138 | A | C | 0.35 | 1.15E-02 | 3.21E-02 | 1.99E-01 |
| rs4526799 | Brain_Caudate_basal_ganglia | 12 | RP11-74M13.4 | 57242410 | rs1874888  | 0.9085 | 57305138 | A | C | 0.35 | 1.15E-02 | 2.40E-02 | 1.91E-01 |
| rs4526799 | Brain_Caudate_basal_ganglia | 12 | PA2G4        | 56502897 | rs10506349 | 0.9128 | 57306412 | T | C | 0.37 | 1.10E-02 | 2.78E-02 | 1.86E-01 |
| rs4526799 | Brain_Caudate_basal_ganglia | 12 | COQ10A       | 56662696 | rs10506349 | 0.9128 | 57306412 | T | C | 0.37 | 1.10E-02 | 1.93E-02 | 1.77E-01 |
| rs4526799 | Brain_Caudate_basal_ganglia | 12 | IL23A        | 56733428 | rs10506349 | 0.9128 | 57306412 | T | C | 0.37 | 1.10E-02 | 4.77E-02 | 2.04E-01 |
| rs4526799 | Brain_Caudate_basal_ganglia | 12 | HSD17B6      | 57163759 | rs10506349 | 0.9128 | 57306412 | T | C | 0.37 | 1.10E-02 | 4.68E-02 | 2.03E-01 |
| rs4526799 | Brain_Caudate_basal_ganglia | 12 | RP11-74M13.4 | 57242410 | rs10506349 | 0.9128 | 57306412 | T | C | 0.37 | 1.10E-02 | 2.52E-02 | 1.83E-01 |
| rs4526799 | Brain_Caudate_basal_ganglia | 12 | PA2G4        | 56502897 | rs10876951 | 0.9085 | 57306430 | T | G | 0.35 | 1.15E-02 | 3.58E-02 | 2.03E-01 |
| rs4526799 | Brain_Caudate_basal_ganglia | 12 | IL23A        | 56733428 | rs10876951 | 0.9085 | 57306430 | T | G | 0.35 | 1.15E-02 | 3.21E-02 | 1.99E-01 |
| rs4526799 | Brain_Caudate_basal_ganglia | 12 | RP11-74M13.4 | 57242410 | rs10876951 | 0.9085 | 57306430 | T | G | 0.35 | 1.15E-02 | 2.40E-02 | 1.91E-01 |
| rs4526799 | Brain_Caudate_basal_ganglia | 12 | PA2G4        | 56502897 | rs10747774 | 0.9128 | 57307079 | T | C | 0.36 | 1.16E-02 | 2.41E-02 | 1.87E-01 |
| rs4526799 | Brain_Caudate_basal_ganglia | 12 | COQ10A       | 56662696 | rs10747774 | 0.9128 | 57307079 | T | C | 0.36 | 1.16E-02 | 2.06E-02 | 1.83E-01 |
| rs4526799 | Brain_Caudate_basal_ganglia | 12 | IL23A        | 56733428 | rs10747774 | 0.9128 | 57307079 | T | C | 0.36 | 1.16E-02 | 4.89E-02 | 2.10E-01 |
| rs4526799 | Brain_Caudate_basal_ganglia | 12 | HSD17B6      | 57163759 | rs10747774 | 0.9128 | 57307079 | T | C | 0.36 | 1.16E-02 | 4.21E-02 | 2.04E-01 |
| rs4526799 | Brain_Caudate_basal_ganglia | 12 | RP11-74M13.4 | 57242410 | rs10747774 | 0.9128 | 57307079 | T | C | 0.36 | 1.16E-02 | 2.38E-02 | 1.87E-01 |
| rs4526799 | Brain_Caudate_basal_ganglia | 12 | PA2G4        | 56502897 | rs10783812 | 0.9085 | 57308723 | C | T | 0.35 | 1.19E-02 | 3.12E-02 | 2.01E-01 |
| rs4526799 | Brain_Caudate_basal_ganglia | 12 | IL23A        | 56733428 | rs10783812 | 0.9085 | 57308723 | C | T | 0.35 | 1.19E-02 | 2.96E-02 | 2.00E-01 |
| rs4526799 | Brain_Caudate_basal_ganglia | 12 | RP11-74M13.4 | 57242410 | rs10783812 | 0.9085 | 57308723 | C | T | 0.35 | 1.19E-02 | 2.55E-02 | 1.96E-01 |

|           |                             |    |               |          |            |        |          |   |   |      |          |          |          |
|-----------|-----------------------------|----|---------------|----------|------------|--------|----------|---|---|------|----------|----------|----------|
| rs4526799 | Brain_Caudate_basal_ganglia | 12 | PA2G4         | 56502897 | rs11172056 | 0.9089 | 57308975 | C | T | 0.37 | 1.10E-02 | 2.41E-02 | 1.82E-01 |
| rs4526799 | Brain_Caudate_basal_ganglia | 12 | COQ10A        | 56662696 | rs11172056 | 0.9089 | 57308975 | C | T | 0.37 | 1.10E-02 | 2.06E-02 | 1.78E-01 |
| rs4526799 | Brain_Caudate_basal_ganglia | 12 | IL23A         | 56733428 | rs11172056 | 0.9089 | 57308975 | C | T | 0.37 | 1.10E-02 | 4.89E-02 | 2.05E-01 |
| rs4526799 | Brain_Caudate_basal_ganglia | 12 | HSD17B6       | 57163759 | rs11172056 | 0.9089 | 57308975 | C | T | 0.37 | 1.10E-02 | 4.21E-02 | 1.99E-01 |
| rs4526799 | Brain_Caudate_basal_ganglia | 12 | RP11-74M13.4  | 57242410 | rs11172056 | 0.9089 | 57308975 | C | T | 0.37 | 1.10E-02 | 2.38E-02 | 1.82E-01 |
| rs4526799 | Brain_Caudate_basal_ganglia | 12 | PA2G4         | 56502897 | rs7302420  | 0.9085 | 57309884 | G | C | 0.36 | 1.54E-02 | 5.98E-03 | 1.86E-01 |
| rs4526799 | Brain_Caudate_basal_ganglia | 12 | IL23A         | 56733428 | rs7302420  | 0.9085 | 57309884 | G | C | 0.36 | 1.54E-02 | 4.78E-03 | 1.84E-01 |
| rs4526799 | Brain_Caudate_basal_ganglia | 12 | HSD17B6       | 57163759 | rs7302420  | 0.9085 | 57309884 | G | C | 0.36 | 1.54E-02 | 3.10E-02 | 2.17E-01 |
| rs4526799 | Brain_Caudate_basal_ganglia | 12 | RP11-74M13.4  | 57242410 | rs7302420  | 0.9085 | 57309884 | G | C | 0.36 | 1.54E-02 | 3.08E-02 | 2.17E-01 |
| rs4526799 | Brain_Caudate_basal_ganglia | 12 | MARS          | 57889799 | rs7302420  | 0.9085 | 57309884 | G | C | 0.36 | 1.54E-02 | 4.92E-02 | 2.32E-01 |
| rs4526799 | Brain_Caudate_basal_ganglia | 12 | TSPAN31       | 58138756 | rs7302420  | 0.9085 | 57309884 | G | C | 0.36 | 1.54E-02 | 2.26E-02 | 2.09E-01 |
| rs4526799 | Brain_Caudate_basal_ganglia | 12 | PA2G4         | 56502897 | rs12228618 | 0.9128 | 57311229 | T | C | 0.37 | 1.29E-02 | 8.25E-03 | 1.70E-01 |
| rs4526799 | Brain_Caudate_basal_ganglia | 12 | COQ10A        | 56662696 | rs12228618 | 0.9128 | 57311229 | T | C | 0.37 | 1.29E-02 | 8.77E-03 | 1.71E-01 |
| rs4526799 | Brain_Caudate_basal_ganglia | 12 | IL23A         | 56733428 | rs12228618 | 0.9128 | 57311229 | T | C | 0.37 | 1.29E-02 | 3.26E-02 | 1.99E-01 |
| rs4526799 | Brain_Caudate_basal_ganglia | 12 | RP11-74M13.4  | 57242410 | rs12228618 | 0.9128 | 57311229 | T | C | 0.37 | 1.29E-02 | 2.65E-02 | 1.93E-01 |
| rs4526799 | Brain_Caudate_basal_ganglia | 12 | PA2G4         | 56502897 | rs9739473  | 0.9012 | 57313335 | A | T | 0.37 | 2.65E-02 | 6.66E-03 | 2.40E-01 |
| rs4526799 | Brain_Caudate_basal_ganglia | 12 | COQ10A        | 56662696 | rs9739473  | 0.9012 | 57313335 | A | T | 0.37 | 2.65E-02 | 9.94E-03 | 2.45E-01 |
| rs4526799 | Brain_Caudate_basal_ganglia | 12 | IL23A         | 56733428 | rs9739473  | 0.9012 | 57313335 | A | T | 0.37 | 2.65E-02 | 4.29E-02 | 2.73E-01 |
| rs4526799 | Brain_Caudate_basal_ganglia | 12 | HSD17B6       | 57163759 | rs9739473  | 0.9012 | 57313335 | A | T | 0.37 | 2.65E-02 | 4.14E-02 | 2.72E-01 |
| rs4526799 | Brain_Caudate_basal_ganglia | 12 | RP11-74M13.4  | 57242410 | rs9739473  | 0.9012 | 57313335 | A | T | 0.37 | 2.65E-02 | 2.15E-02 | 2.57E-01 |
| rs4526799 | Brain_Cerebellar_Hemisphere | 12 | RPS26         | 56436876 | rs9919772  | 0.8450 | 57260027 | T | C | 0.33 | 1.03E-02 | 4.72E-02 | 2.34E-01 |
| rs4526799 | Brain_Cerebellar_Hemisphere | 12 | SLC39A5       | 56627711 | rs9919772  | 0.8450 | 57260027 | T | C | 0.33 | 1.03E-02 | 4.86E-02 | 2.35E-01 |
| rs4526799 | Brain_Cerebellar_Hemisphere | 12 | ATP5B         | 57035878 | rs9919772  | 0.8450 | 57260027 | T | C | 0.33 | 1.03E-02 | 1.54E-02 | 2.04E-01 |
| rs4526799 | Brain_Cerebellar_Hemisphere | 12 | RP11-603J24.7 | 56374517 | rs4495925  | 0.8650 | 57268116 | C | G | 0.33 | 1.04E-02 | 4.54E-02 | 2.29E-01 |
| rs4526799 | Brain_Cerebellar_Hemisphere | 12 | RPS26         | 56436876 | rs4495925  | 0.8650 | 57268116 | C | G | 0.33 | 1.04E-02 | 2.94E-02 | 2.16E-01 |
| rs4526799 | Brain_Cerebellar_Hemisphere | 12 | ATP5B         | 57035878 | rs4495925  | 0.8650 | 57268116 | C | G | 0.33 | 1.04E-02 | 1.73E-02 | 2.04E-01 |
| rs4526799 | Brain_Cerebellar_Hemisphere | 12 | CYP27B1       | 58158578 | rs4495925  | 0.8650 | 57268116 | C | G | 0.33 | 1.04E-02 | 4.88E-02 | 2.32E-01 |
| rs4526799 | Brain_Cerebellar_Hemisphere | 12 | RP11-603J24.7 | 56374517 | rs4471472  | 0.8650 | 57268985 | A | G | 0.32 | 9.99E-03 | 4.34E-02 | 2.24E-01 |
| rs4526799 | Brain_Cerebellar_Hemisphere | 12 | RPS26         | 56436876 | rs4471472  | 0.8650 | 57268985 | A | G | 0.32 | 9.99E-03 | 3.33E-02 | 2.16E-01 |
| rs4526799 | Brain_Cerebellar_Hemisphere | 12 | ATP5B         | 57035878 | rs4471472  | 0.8650 | 57268985 | A | G | 0.32 | 9.99E-03 | 1.70E-02 | 1.99E-01 |
| rs4526799 | Brain_Cerebellar_Hemisphere | 12 | CYP27B1       | 58158578 | rs4471472  | 0.8650 | 57268985 | A | G | 0.32 | 9.99E-03 | 3.85E-02 | 2.20E-01 |
| rs4526799 | Brain_Cerebellar_Hemisphere | 12 | RP11-603J24.7 | 56374517 | rs4633499  | 0.8610 | 57269264 | A | T | 0.32 | 1.43E-02 | 4.84E-02 | 2.61E-01 |
| rs4526799 | Brain_Cerebellar_Hemisphere | 12 | RPS26         | 56436876 | rs4633499  | 0.8610 | 57269264 | A | T | 0.32 | 1.43E-02 | 2.01E-02 | 2.38E-01 |
| rs4526799 | Brain_Cerebellar_Hemisphere | 12 | ATP5B         | 57035878 | rs4633499  | 0.8610 | 57269264 | A | T | 0.32 | 1.43E-02 | 1.10E-02 | 2.28E-01 |
| rs4526799 | Brain_Cerebellar_Hemisphere | 12 | PMEL          | 56357495 | rs12300079 | 0.9956 | 57273194 | T | C | 0.36 | 3.73E-03 | 9.90E-03 | 1.38E-01 |
| rs4526799 | Brain_Cerebellar_Hemisphere | 12 | RP11-603J24.7 | 56374517 | rs12300079 | 0.9956 | 57273194 | T | C | 0.36 | 3.73E-03 | 9.33E-03 | 1.37E-01 |
| rs4526799 | Brain_Cerebellar_Hemisphere | 12 | MYL6          | 56554355 | rs12300079 | 0.9956 | 57273194 | T | C | 0.36 | 3.73E-03 | 1.40E-02 | 1.45E-01 |
| rs4526799 | Brain_Cerebellar_Hemisphere | 12 | METT121B      | 58170856 | rs12300079 | 0.9956 | 57273194 | T | C | 0.36 | 3.73E-03 | 4.24E-02 | 1.77E-01 |
| rs4526799 | Brain_Cerebellar_Hemisphere | 12 | PMEL          | 56357495 | rs12300191 | 0.9956 | 57273289 | A | G | 0.36 | 3.59E-03 | 9.90E-03 | 1.36E-01 |
| rs4526799 | Brain_Cerebellar_Hemisphere | 12 | RP11-603J24.7 | 56374517 | rs12300191 | 0.9956 | 57273289 | A | G | 0.36 | 3.59E-03 | 9.33E-03 | 1.35E-01 |



|           |                             |    |               |          |            |        |          |   |   |      |          |          |          |
|-----------|-----------------------------|----|---------------|----------|------------|--------|----------|---|---|------|----------|----------|----------|
| rs4526799 | Brain_Cerebellar_Hemisphere | 12 | MYL6          | 56554355 | rs12300191 | 0.9956 | 57273289 | A | G | 0.36 | 3.59E-03 | 1.40E-02 | 1.43E-01 |
| rs4526799 | Brain_Cerebellar_Hemisphere | 12 | METTL21B      | 58170856 | rs12300191 | 0.9956 | 57273289 | A | G | 0.36 | 3.59E-03 | 4.24E-02 | 1.75E-01 |
| rs4526799 | Brain_Cerebellar_Hemisphere | 12 | PMEL          | 56357495 | rs4514464  | 0.9956 | 57276375 | C | T | 0.36 | 2.92E-03 | 9.90E-03 | 1.33E-01 |
| rs4526799 | Brain_Cerebellar_Hemisphere | 12 | RP11-603J24.7 | 56374517 | rs4514464  | 0.9956 | 57276375 | C | T | 0.36 | 2.92E-03 | 9.33E-03 | 1.32E-01 |
| rs4526799 | Brain_Cerebellar_Hemisphere | 12 | MYL6          | 56554355 | rs4514464  | 0.9956 | 57276375 | C | T | 0.36 | 2.92E-03 | 1.40E-02 | 1.39E-01 |
| rs4526799 | Brain_Cerebellar_Hemisphere | 12 | METTL21B      | 58170856 | rs4514464  | 0.9956 | 57276375 | C | T | 0.36 | 2.92E-03 | 4.24E-02 | 1.72E-01 |
| rs4526799 | Brain_Cerebellar_Hemisphere | 12 | PMEL          | 56357495 | rs4417325  | 0.9956 | 57277302 | G | A | 0.36 | 3.59E-03 | 9.90E-03 | 1.36E-01 |
| rs4526799 | Brain_Cerebellar_Hemisphere | 12 | RP11-603J24.7 | 56374517 | rs4417325  | 0.9956 | 57277302 | G | A | 0.36 | 3.59E-03 | 9.33E-03 | 1.35E-01 |
| rs4526799 | Brain_Cerebellar_Hemisphere | 12 | MYL6          | 56554355 | rs4417325  | 0.9956 | 57277302 | G | A | 0.36 | 3.59E-03 | 1.40E-02 | 1.43E-01 |
| rs4526799 | Brain_Cerebellar_Hemisphere | 12 | METTL21B      | 58170856 | rs4417325  | 0.9956 | 57277302 | G | A | 0.36 | 3.59E-03 | 4.24E-02 | 1.75E-01 |
| rs4526799 | Brain_Cerebellar_Hemisphere | 12 | PMEL          | 56357495 | rs11172030 | 0.9956 | 57278076 | A | C | 0.36 | 3.63E-03 | 9.90E-03 | 1.37E-01 |
| rs4526799 | Brain_Cerebellar_Hemisphere | 12 | RP11-603J24.7 | 56374517 | rs11172030 | 0.9956 | 57278076 | A | C | 0.36 | 3.63E-03 | 9.33E-03 | 1.36E-01 |
| rs4526799 | Brain_Cerebellar_Hemisphere | 12 | MYL6          | 56554355 | rs11172030 | 0.9956 | 57278076 | A | C | 0.36 | 3.63E-03 | 1.40E-02 | 1.43E-01 |
| rs4526799 | Brain_Cerebellar_Hemisphere | 12 | METTL21B      | 58170856 | rs11172030 | 0.9956 | 57278076 | A | C | 0.36 | 3.63E-03 | 4.24E-02 | 1.75E-01 |
| rs4526799 | Brain_Cerebellar_Hemisphere | 12 | PMEL          | 56357495 | rs10876944 | 0.9956 | 57279372 | T | A | 0.36 | 3.63E-03 | 9.90E-03 | 1.37E-01 |
| rs4526799 | Brain_Cerebellar_Hemisphere | 12 | RP11-603J24.7 | 56374517 | rs10876944 | 0.9956 | 57279372 | T | A | 0.36 | 3.63E-03 | 9.33E-03 | 1.36E-01 |
| rs4526799 | Brain_Cerebellar_Hemisphere | 12 | MYL6          | 56554355 | rs10876944 | 0.9956 | 57279372 | T | A | 0.36 | 3.63E-03 | 1.40E-02 | 1.43E-01 |
| rs4526799 | Brain_Cerebellar_Hemisphere | 12 | METTL21B      | 58170856 | rs10876944 | 0.9956 | 57279372 | T | A | 0.36 | 3.63E-03 | 4.24E-02 | 1.75E-01 |
| rs4526799 | Brain_Cerebellar_Hemisphere | 12 | PMEL          | 56357495 | rs4326839  | 0.9956 | 57280374 | G | C | 0.36 | 3.58E-03 | 9.90E-03 | 1.36E-01 |
| rs4526799 | Brain_Cerebellar_Hemisphere | 12 | RP11-603J24.7 | 56374517 | rs4326839  | 0.9956 | 57280374 | G | C | 0.36 | 3.58E-03 | 9.33E-03 | 1.35E-01 |
| rs4526799 | Brain_Cerebellar_Hemisphere | 12 | MYL6          | 56554355 | rs4326839  | 0.9956 | 57280374 | G | C | 0.36 | 3.58E-03 | 1.40E-02 | 1.42E-01 |
| rs4526799 | Brain_Cerebellar_Hemisphere | 12 | METTL21B      | 58170856 | rs4326839  | 0.9956 | 57280374 | G | C | 0.36 | 3.58E-03 | 4.24E-02 | 1.74E-01 |
| rs4526799 | Brain_Cerebellar_Hemisphere | 12 | PMEL          | 56357495 | rs4526799  | 1.0000 | 57280586 | T | C | 0.34 | 7.26E-06 | 9.90E-03 | 3.69E-02 |
| rs4526799 | Brain_Cerebellar_Hemisphere | 12 | RP11-603J24.7 | 56374517 | rs4526799  | 1.0000 | 57280586 | T | C | 0.34 | 7.26E-06 | 9.33E-03 | 3.59E-02 |
| rs4526799 | Brain_Cerebellar_Hemisphere | 12 | MYL6          | 56554355 | rs4526799  | 1.0000 | 57280586 | T | C | 0.34 | 7.26E-06 | 1.40E-02 | 4.33E-02 |
| rs4526799 | Brain_Cerebellar_Hemisphere | 12 | METTL21B      | 58170856 | rs4526799  | 1.0000 | 57280586 | T | C | 0.34 | 7.26E-06 | 4.24E-02 | 7.81E-02 |
| rs4526799 | Brain_Cerebellar_Hemisphere | 12 | PMEL          | 56357495 | rs28876529 | 0.9956 | 57285301 | T | A | 0.36 | 2.25E-03 | 9.90E-03 | 1.20E-01 |
| rs4526799 | Brain_Cerebellar_Hemisphere | 12 | RP11-603J24.7 | 56374517 | rs28876529 | 0.9956 | 57285301 | T | A | 0.36 | 2.25E-03 | 9.33E-03 | 1.19E-01 |
| rs4526799 | Brain_Cerebellar_Hemisphere | 12 | MYL6          | 56554355 | rs28876529 | 0.9956 | 57285301 | T | A | 0.36 | 2.25E-03 | 1.40E-02 | 1.27E-01 |
| rs4526799 | Brain_Cerebellar_Hemisphere | 12 | METTL21B      | 58170856 | rs28876529 | 0.9956 | 57285301 | T | A | 0.36 | 2.25E-03 | 4.24E-02 | 1.60E-01 |
| rs4526799 | Brain_Cerebellar_Hemisphere | 12 | PMEL          | 56357495 | rs11172037 | 0.9956 | 57285427 | T | A | 0.36 | 2.25E-03 | 9.90E-03 | 1.20E-01 |
| rs4526799 | Brain_Cerebellar_Hemisphere | 12 | RP11-603J24.7 | 56374517 | rs11172037 | 0.9956 | 57285427 | T | A | 0.36 | 2.25E-03 | 9.33E-03 | 1.19E-01 |
| rs4526799 | Brain_Cerebellar_Hemisphere | 12 | MYL6          | 56554355 | rs11172037 | 0.9956 | 57285427 | T | A | 0.36 | 2.25E-03 | 1.40E-02 | 1.27E-01 |
| rs4526799 | Brain_Cerebellar_Hemisphere | 12 | METTL21B      | 58170856 | rs11172037 | 0.9956 | 57285427 | T | A | 0.36 | 2.25E-03 | 4.24E-02 | 1.60E-01 |
| rs4526799 | Brain_Cerebellar_Hemisphere | 12 | PMEL          | 56357495 | rs12321987 | 0.9956 | 57288449 | G | A | 0.36 | 4.47E-03 | 9.90E-03 | 1.59E-01 |
| rs4526799 | Brain_Cerebellar_Hemisphere | 12 | RP11-603J24.7 | 56374517 | rs12321987 | 0.9956 | 57288449 | G | A | 0.36 | 4.47E-03 | 9.33E-03 | 1.58E-01 |
| rs4526799 | Brain_Cerebellar_Hemisphere | 12 | MYL6          | 56554355 | rs12321987 | 0.9956 | 57288449 | G | A | 0.36 | 4.47E-03 | 1.40E-02 | 1.65E-01 |
| rs4526799 | Brain_Cerebellar_Hemisphere | 12 | METTL21B      | 58170856 | rs12321987 | 0.9956 | 57288449 | G | A | 0.36 | 4.47E-03 | 4.24E-02 | 1.95E-01 |
| rs4526799 | Brain_Cerebellar_Hemisphere | 12 | PMEL          | 56357495 | rs11172043 | 0.9869 | 57293182 | G | A | 0.35 | 4.58E-03 | 4.29E-02 | 1.94E-01 |
| rs4526799 | Brain_Cerebellar_Hemisphere | 12 | RP11-603J24.7 | 56374517 | rs11172043 | 0.9869 | 57293182 | G | A | 0.35 | 4.58E-03 | 5.63E-03 | 1.49E-01 |

|           |                             |    |               |          |            |        |          |   |   |      |          |          |          |
|-----------|-----------------------------|----|---------------|----------|------------|--------|----------|---|---|------|----------|----------|----------|
| rs4526799 | Brain_Cerebellar_Hemisphere | 12 | MYL6          | 56554355 | rs11172043 | 0.9869 | 57293182 | G | A | 0.35 | 4.58E-03 | 1.93E-02 | 1.70E-01 |
| rs4526799 | Brain_Cerebellar_Hemisphere | 12 | ATP5B         | 57035878 | rs11172043 | 0.9869 | 57293182 | G | A | 0.35 | 4.58E-03 | 3.70E-02 | 1.89E-01 |
| rs4526799 | Brain_Cerebellar_Hemisphere | 12 | PMEL          | 56357495 | rs12426816 | 0.9869 | 57294074 | A | C | 0.35 | 4.50E-03 | 4.29E-02 | 1.94E-01 |
| rs4526799 | Brain_Cerebellar_Hemisphere | 12 | RP11-603J24.7 | 56374517 | rs12426816 | 0.9869 | 57294074 | A | C | 0.35 | 4.50E-03 | 5.63E-03 | 1.48E-01 |
| rs4526799 | Brain_Cerebellar_Hemisphere | 12 | MYL6          | 56554355 | rs12426816 | 0.9869 | 57294074 | A | C | 0.35 | 4.50E-03 | 1.93E-02 | 1.70E-01 |
| rs4526799 | Brain_Cerebellar_Hemisphere | 12 | ATP5B         | 57035878 | rs12426816 | 0.9869 | 57294074 | A | C | 0.35 | 4.50E-03 | 3.70E-02 | 1.88E-01 |
| rs4526799 | Brain_Cerebellar_Hemisphere | 12 | PMEL          | 56357495 | rs11172047 | 0.9869 | 57298080 | T | C | 0.35 | 6.51E-03 | 4.29E-02 | 2.07E-01 |
| rs4526799 | Brain_Cerebellar_Hemisphere | 12 | RP11-603J24.7 | 56374517 | rs11172047 | 0.9869 | 57298080 | T | C | 0.35 | 6.51E-03 | 5.63E-03 | 1.64E-01 |
| rs4526799 | Brain_Cerebellar_Hemisphere | 12 | MYL6          | 56554355 | rs11172047 | 0.9869 | 57298080 | T | C | 0.35 | 6.51E-03 | 1.93E-02 | 1.84E-01 |
| rs4526799 | Brain_Cerebellar_Hemisphere | 12 | ATP5B         | 57035878 | rs11172047 | 0.9869 | 57298080 | T | C | 0.35 | 6.51E-03 | 3.70E-02 | 2.02E-01 |
| rs4526799 | Brain_Cerebellar_Hemisphere | 12 | PMEL          | 56357495 | rs2371631  | 0.9869 | 57298614 | T | A | 0.35 | 6.32E-03 | 4.29E-02 | 2.04E-01 |
| rs4526799 | Brain_Cerebellar_Hemisphere | 12 | RP11-603J24.7 | 56374517 | rs2371631  | 0.9869 | 57298614 | T | A | 0.35 | 6.32E-03 | 5.63E-03 | 1.60E-01 |
| rs4526799 | Brain_Cerebellar_Hemisphere | 12 | MYL6          | 56554355 | rs2371631  | 0.9869 | 57298614 | T | A | 0.35 | 6.32E-03 | 1.93E-02 | 1.81E-01 |
| rs4526799 | Brain_Cerebellar_Hemisphere | 12 | ATP5B         | 57035878 | rs2371631  | 0.9869 | 57298614 | T | A | 0.35 | 6.32E-03 | 3.70E-02 | 1.99E-01 |
| rs4526799 | Brain_Cerebellar_Hemisphere | 12 | PMEL          | 56357495 | rs12305763 | 0.9869 | 57299263 | G | A | 0.35 | 6.82E-03 | 4.29E-02 | 2.09E-01 |
| rs4526799 | Brain_Cerebellar_Hemisphere | 12 | RP11-603J24.7 | 56374517 | rs12305763 | 0.9869 | 57299263 | G | A | 0.35 | 6.82E-03 | 5.63E-03 | 1.65E-01 |
| rs4526799 | Brain_Cerebellar_Hemisphere | 12 | MYL6          | 56554355 | rs12305763 | 0.9869 | 57299263 | G | A | 0.35 | 6.82E-03 | 1.93E-02 | 1.86E-01 |
| rs4526799 | Brain_Cerebellar_Hemisphere | 12 | ATP5B         | 57035878 | rs12305763 | 0.9869 | 57299263 | G | A | 0.35 | 6.82E-03 | 3.70E-02 | 2.03E-01 |
| rs4526799 | Brain_Cerebellar_Hemisphere | 12 | RP11-603J24.7 | 56374517 | rs11172049 | 0.9128 | 57304203 | T | C | 0.35 | 1.15E-02 | 1.61E-02 | 1.82E-01 |
| rs4526799 | Brain_Cerebellar_Hemisphere | 12 | RP11-603J24.5 | 56518610 | rs11172049 | 0.9128 | 57304203 | T | C | 0.35 | 1.15E-02 | 1.66E-02 | 1.83E-01 |
| rs4526799 | Brain_Cerebellar_Hemisphere | 12 | ATP5B         | 57035878 | rs11172049 | 0.9128 | 57304203 | T | C | 0.35 | 1.15E-02 | 3.72E-02 | 2.04E-01 |
| rs4526799 | Brain_Cerebellar_Hemisphere | 12 | RP11-603J24.7 | 56374517 | rs1874888  | 0.9085 | 57305138 | A | C | 0.35 | 1.15E-02 | 1.61E-02 | 1.82E-01 |
| rs4526799 | Brain_Cerebellar_Hemisphere | 12 | RP11-603J24.5 | 56518610 | rs1874888  | 0.9085 | 57305138 | A | C | 0.35 | 1.15E-02 | 1.66E-02 | 1.83E-01 |
| rs4526799 | Brain_Cerebellar_Hemisphere | 12 | ATP5B         | 57035878 | rs1874888  | 0.9085 | 57305138 | A | C | 0.35 | 1.15E-02 | 3.72E-02 | 2.04E-01 |
| rs4526799 | Brain_Cerebellar_Hemisphere | 12 | RP11-603J24.7 | 56374517 | rs10506349 | 0.9128 | 57306412 | T | C | 0.37 | 1.10E-02 | 1.70E-02 | 1.74E-01 |
| rs4526799 | Brain_Cerebellar_Hemisphere | 12 | RP11-603J24.5 | 56518610 | rs10506349 | 0.9128 | 57306412 | T | C | 0.37 | 1.10E-02 | 1.58E-02 | 1.72E-01 |
| rs4526799 | Brain_Cerebellar_Hemisphere | 12 | ATP5B         | 57035878 | rs10506349 | 0.9128 | 57306412 | T | C | 0.37 | 1.10E-02 | 4.83E-02 | 2.05E-01 |
| rs4526799 | Brain_Cerebellar_Hemisphere | 12 | METTL21B      | 58170856 | rs10506349 | 0.9128 | 57306412 | T | C | 0.37 | 1.10E-02 | 4.90E-02 | 2.05E-01 |
| rs4526799 | Brain_Cerebellar_Hemisphere | 12 | RP11-603J24.7 | 56374517 | rs10876951 | 0.9085 | 57306430 | T | G | 0.35 | 1.15E-02 | 1.61E-02 | 1.82E-01 |
| rs4526799 | Brain_Cerebellar_Hemisphere | 12 | RP11-603J24.5 | 56518610 | rs10876951 | 0.9085 | 57306430 | T | G | 0.35 | 1.15E-02 | 1.66E-02 | 1.83E-01 |
| rs4526799 | Brain_Cerebellar_Hemisphere | 12 | ATP5B         | 57035878 | rs10876951 | 0.9085 | 57306430 | T | G | 0.35 | 1.15E-02 | 3.72E-02 | 2.04E-01 |
| rs4526799 | Brain_Cerebellar_Hemisphere | 12 | RP11-603J24.7 | 56374517 | rs10747774 | 0.9128 | 57307079 | T | C | 0.36 | 1.16E-02 | 1.70E-02 | 1.79E-01 |
| rs4526799 | Brain_Cerebellar_Hemisphere | 12 | RP11-603J24.5 | 56518610 | rs10747774 | 0.9128 | 57307079 | T | C | 0.36 | 1.16E-02 | 1.58E-02 | 1.78E-01 |
| rs4526799 | Brain_Cerebellar_Hemisphere | 12 | ATP5B         | 57035878 | rs10747774 | 0.9128 | 57307079 | T | C | 0.36 | 1.16E-02 | 4.83E-02 | 2.10E-01 |
| rs4526799 | Brain_Cerebellar_Hemisphere | 12 | METTL21B      | 58170856 | rs10747774 | 0.9128 | 57307079 | T | C | 0.36 | 1.16E-02 | 4.90E-02 | 2.10E-01 |
| rs4526799 | Brain_Cerebellar_Hemisphere | 12 | RP11-603J24.7 | 56374517 | rs10783812 | 0.9085 | 57308723 | C | T | 0.35 | 1.19E-02 | 1.61E-02 | 1.85E-01 |
| rs4526799 | Brain_Cerebellar_Hemisphere | 12 | RP11-603J24.5 | 56518610 | rs10783812 | 0.9085 | 57308723 | C | T | 0.35 | 1.19E-02 | 1.66E-02 | 1.86E-01 |
| rs4526799 | Brain_Cerebellar_Hemisphere | 12 | ATP5B         | 57035878 | rs10783812 | 0.9085 | 57308723 | C | T | 0.35 | 1.19E-02 | 3.72E-02 | 2.07E-01 |
| rs4526799 | Brain_Cerebellar_Hemisphere | 12 | RP11-603J24.7 | 56374517 | rs11172056 | 0.9089 | 57308975 | C | T | 0.37 | 1.10E-02 | 1.70E-02 | 1.74E-01 |
| rs4526799 | Brain_Cerebellar_Hemisphere | 12 | RP11-603J24.5 | 56518610 | rs11172056 | 0.9089 | 57308975 | C | T | 0.37 | 1.10E-02 | 1.58E-02 | 1.72E-01 |

|           |                             |    |                      |          |            |        |          |   |   |      |          |          |          |
|-----------|-----------------------------|----|----------------------|----------|------------|--------|----------|---|---|------|----------|----------|----------|
| rs4526799 | Brain_Cerebellar_Hemisphere | 12 | <i>ATP5B</i>         | 57035878 | rs11172056 | 0.9089 | 57308975 | C | T | 0.37 | 1.10E-02 | 4.83E-02 | 2.05E-01 |
| rs4526799 | Brain_Cerebellar_Hemisphere | 12 | <i>METTL21B</i>      | 58170856 | rs11172056 | 0.9089 | 57308975 | C | T | 0.37 | 1.10E-02 | 4.90E-02 | 2.05E-01 |
| rs4526799 | Brain_Cerebellar_Hemisphere | 12 | <i>PME1</i>          | 56357495 | rs7302420  | 0.9085 | 57309884 | G | C | 0.36 | 1.54E-02 | 4.44E-02 | 2.28E-01 |
| rs4526799 | Brain_Cerebellar_Hemisphere | 12 | <i>RP11-603J24.7</i> | 56374517 | rs7302420  | 0.9085 | 57309884 | G | C | 0.36 | 1.54E-02 | 2.46E-02 | 2.11E-01 |
| rs4526799 | Brain_Cerebellar_Hemisphere | 12 | <i>RP11-603J24.5</i> | 56518610 | rs7302420  | 0.9085 | 57309884 | G | C | 0.36 | 1.54E-02 | 4.29E-02 | 2.27E-01 |
| rs4526799 | Brain_Cerebellar_Hemisphere | 12 | <i>ATP5B</i>         | 57035878 | rs7302420  | 0.9085 | 57309884 | G | C | 0.36 | 1.54E-02 | 4.66E-02 | 2.30E-01 |
| rs4526799 | Brain_Cerebellar_Hemisphere | 12 | <i>RP11-603J24.7</i> | 56374517 | rs12228618 | 0.9128 | 57311229 | T | C | 0.37 | 1.29E-02 | 2.09E-02 | 1.87E-01 |
| rs4526799 | Brain_Cerebellar_Hemisphere | 12 | <i>ATP5B</i>         | 57035878 | rs12228618 | 0.9128 | 57311229 | T | C | 0.37 | 1.29E-02 | 3.71E-02 | 2.03E-01 |
| rs4526799 | Brain_Cerebellar_Hemisphere | 12 | <i>METTL21B</i>      | 58170856 | rs12228618 | 0.9128 | 57311229 | T | C | 0.37 | 1.29E-02 | 4.46E-02 | 2.10E-01 |
| rs4526799 | Brain_Cerebellar_Hemisphere | 12 | <i>RP11-603J24.7</i> | 56374517 | rs9739473  | 0.9012 | 57313335 | A | T | 0.37 | 2.65E-02 | 3.13E-02 | 2.65E-01 |
| rs4526799 | Brain_Cerebellar_Hemisphere | 12 | <i>RP11-603J24.5</i> | 56518610 | rs9739473  | 0.9012 | 57313335 | A | T | 0.37 | 2.65E-02 | 4.90E-02 | 2.77E-01 |
| rs4526799 | Brain_Cerebellar_Hemisphere | 12 | <i>ATP5B</i>         | 57035878 | rs9739473  | 0.9012 | 57313335 | A | T | 0.37 | 2.65E-02 | 4.46E-02 | 2.74E-01 |
| rs4526799 | Brain_Cerebellar_Hemisphere | 12 | <i>METTL21B</i>      | 58170856 | rs9739473  | 0.9012 | 57313335 | A | T | 0.37 | 2.65E-02 | 2.92E-02 | 2.63E-01 |
| rs4526799 | Brain_Cerebellum            | 12 | <i>RPS26</i>         | 56436876 | rs9919772  | 0.8450 | 57260027 | T | C | 0.33 | 1.03E-02 | 1.84E-02 | 2.08E-01 |
| rs4526799 | Brain_Cerebellum            | 12 | <i>MYL6</i>          | 56554355 | rs9919772  | 0.8450 | 57260027 | T | C | 0.33 | 1.03E-02 | 3.55E-02 | 2.24E-01 |
| rs4526799 | Brain_Cerebellum            | 12 | <i>RP11-977G19.5</i> | 56570105 | rs9919772  | 0.8450 | 57260027 | T | C | 0.33 | 1.03E-02 | 1.67E-02 | 2.06E-01 |
| rs4526799 | Brain_Cerebellum            | 12 | <i>CS</i>            | 56679829 | rs9919772  | 0.8450 | 57260027 | T | C | 0.33 | 1.03E-02 | 2.72E-02 | 2.17E-01 |
| rs4526799 | Brain_Cerebellum            | 12 | <i>TIMELESS</i>      | 56827045 | rs9919772  | 0.8450 | 57260027 | T | C | 0.33 | 1.03E-02 | 4.55E-02 | 2.32E-01 |
| rs4526799 | Brain_Cerebellum            | 12 | <i>PTGES3</i>        | 57069643 | rs9919772  | 0.8450 | 57260027 | T | C | 0.33 | 1.03E-02 | 1.35E-02 | 2.02E-01 |
| rs4526799 | Brain_Cerebellum            | 12 | <i>PRIM1</i>         | 57135785 | rs9919772  | 0.8450 | 57260027 | T | C | 0.33 | 1.03E-02 | 3.17E-02 | 2.21E-01 |
| rs4526799 | Brain_Cerebellum            | 12 | <i>RDH16</i>         | 57349188 | rs9919772  | 0.8450 | 57260027 | T | C | 0.33 | 1.03E-02 | 1.47E-02 | 2.04E-01 |
| rs4526799 | Brain_Cerebellum            | 12 | <i>B4GALNT1</i>      | 58023536 | rs9919772  | 0.8450 | 57260027 | T | C | 0.33 | 1.03E-02 | 2.65E-02 | 2.16E-01 |
| rs4526799 | Brain_Cerebellum            | 12 | <i>CYP27B1</i>       | 58158578 | rs9919772  | 0.8450 | 57260027 | T | C | 0.33 | 1.03E-02 | 2.05E-02 | 2.10E-01 |
| rs4526799 | Brain_Cerebellum            | 12 | <i>RPS26</i>         | 56436876 | rs4495925  | 0.8650 | 57268116 | C | G | 0.33 | 1.04E-02 | 9.66E-03 | 1.94E-01 |
| rs4526799 | Brain_Cerebellum            | 12 | <i>ESYT1</i>         | 56530147 | rs4495925  | 0.8650 | 57268116 | C | G | 0.33 | 1.04E-02 | 2.99E-02 | 2.16E-01 |
| rs4526799 | Brain_Cerebellum            | 12 | <i>RP11-977G19.5</i> | 56570105 | rs4495925  | 0.8650 | 57268116 | C | G | 0.33 | 1.04E-02 | 1.43E-02 | 2.00E-01 |
| rs4526799 | Brain_Cerebellum            | 12 | <i>PTGES3</i>        | 57069643 | rs4495925  | 0.8650 | 57268116 | C | G | 0.33 | 1.04E-02 | 1.73E-02 | 2.04E-01 |
| rs4526799 | Brain_Cerebellum            | 12 | <i>RDH16</i>         | 57349188 | rs4495925  | 0.8650 | 57268116 | C | G | 0.33 | 1.04E-02 | 4.84E-03 | 1.85E-01 |
| rs4526799 | Brain_Cerebellum            | 12 | <i>B4GALNT1</i>      | 58023536 | rs4495925  | 0.8650 | 57268116 | C | G | 0.33 | 1.04E-02 | 3.91E-02 | 2.24E-01 |
| rs4526799 | Brain_Cerebellum            | 12 | <i>RPS26</i>         | 56436876 | rs4471472  | 0.8650 | 57268985 | A | G | 0.32 | 9.99E-03 | 9.94E-03 | 1.90E-01 |
| rs4526799 | Brain_Cerebellum            | 12 | <i>ESYT1</i>         | 56530147 | rs4471472  | 0.8650 | 57268985 | A | G | 0.32 | 9.99E-03 | 3.43E-02 | 2.17E-01 |
| rs4526799 | Brain_Cerebellum            | 12 | <i>RP11-977G19.5</i> | 56570105 | rs4471472  | 0.8650 | 57268985 | A | G | 0.32 | 9.99E-03 | 1.75E-02 | 2.00E-01 |
| rs4526799 | Brain_Cerebellum            | 12 | <i>PTGES3</i>        | 57069643 | rs4471472  | 0.8650 | 57268985 | A | G | 0.32 | 9.99E-03 | 1.76E-02 | 2.00E-01 |
| rs4526799 | Brain_Cerebellum            | 12 | <i>RDH16</i>         | 57349188 | rs4471472  | 0.8650 | 57268985 | A | G | 0.32 | 9.99E-03 | 4.10E-03 | 1.79E-01 |
| rs4526799 | Brain_Cerebellum            | 12 | <i>B4GALNT1</i>      | 58023536 | rs4471472  | 0.8650 | 57268985 | A | G | 0.32 | 9.99E-03 | 4.01E-02 | 2.22E-01 |
| rs4526799 | Brain_Cerebellum            | 12 | <i>RPS26</i>         | 56436876 | rs4633499  | 0.8610 | 57269264 | A | T | 0.32 | 1.43E-02 | 4.61E-03 | 2.18E-01 |
| rs4526799 | Brain_Cerebellum            | 12 | <i>ESYT1</i>         | 56530147 | rs4633499  | 0.8610 | 57269264 | A | T | 0.32 | 1.43E-02 | 1.08E-02 | 2.28E-01 |
| rs4526799 | Brain_Cerebellum            | 12 | <i>RP11-977G19.5</i> | 56570105 | rs4633499  | 0.8610 | 57269264 | A | T | 0.32 | 1.43E-02 | 2.82E-02 | 2.46E-01 |
| rs4526799 | Brain_Cerebellum            | 12 | <i>PTGES3</i>        | 57069643 | rs4633499  | 0.8610 | 57269264 | A | T | 0.32 | 1.43E-02 | 3.62E-02 | 2.52E-01 |
| rs4526799 | Brain_Cerebellum            | 12 | <i>RDH16</i>         | 57349188 | rs4633499  | 0.8610 | 57269264 | A | T | 0.32 | 1.43E-02 | 3.58E-03 | 2.16E-01 |

|           |                  |    |                 |          |            |        |          |   |   |      |          |          |          |
|-----------|------------------|----|-----------------|----------|------------|--------|----------|---|---|------|----------|----------|----------|
| rs4526799 | Brain_Cerebellum | 12 | <i>B4GALNT1</i> | 58023536 | rs4633499  | 0.8610 | 57269264 | A | T | 0.32 | 1.43E-02 | 2.59E-02 | 2.44E-01 |
| rs4526799 | Brain_Cerebellum | 12 | <i>RPS26</i>    | 56436876 | rs12300079 | 0.9956 | 57273194 | T | C | 0.36 | 3.73E-03 | 2.88E-02 | 1.63E-01 |
| rs4526799 | Brain_Cerebellum | 12 | <i>CS</i>       | 56679829 | rs12300079 | 0.9956 | 57273194 | T | C | 0.36 | 3.73E-03 | 3.16E-02 | 1.66E-01 |
| rs4526799 | Brain_Cerebellum | 12 | <i>MIP</i>      | 56853054 | rs12300079 | 0.9956 | 57273194 | T | C | 0.36 | 3.73E-03 | 4.42E-02 | 1.78E-01 |
| rs4526799 | Brain_Cerebellum | 12 | <i>PTGES3</i>   | 57069643 | rs12300079 | 0.9956 | 57273194 | T | C | 0.36 | 3.73E-03 | 3.11E-02 | 1.66E-01 |
| rs4526799 | Brain_Cerebellum | 12 | <i>RDH16</i>    | 57349188 | rs12300079 | 0.9956 | 57273194 | T | C | 0.36 | 3.73E-03 | 2.13E-02 | 1.55E-01 |
| rs4526799 | Brain_Cerebellum | 12 | <i>RPS26</i>    | 56436876 | rs12300191 | 0.9956 | 57273289 | A | G | 0.36 | 3.59E-03 | 2.88E-02 | 1.61E-01 |
| rs4526799 | Brain_Cerebellum | 12 | <i>CS</i>       | 56679829 | rs12300191 | 0.9956 | 57273289 | A | G | 0.36 | 3.59E-03 | 3.16E-02 | 1.64E-01 |
| rs4526799 | Brain_Cerebellum | 12 | <i>MIP</i>      | 56853054 | rs12300191 | 0.9956 | 57273289 | A | G | 0.36 | 3.59E-03 | 4.42E-02 | 1.76E-01 |
| rs4526799 | Brain_Cerebellum | 12 | <i>PTGES3</i>   | 57069643 | rs12300191 | 0.9956 | 57273289 | A | G | 0.36 | 3.59E-03 | 3.11E-02 | 1.63E-01 |
| rs4526799 | Brain_Cerebellum | 12 | <i>RDH16</i>    | 57349188 | rs12300191 | 0.9956 | 57273289 | A | G | 0.36 | 3.59E-03 | 2.13E-02 | 1.52E-01 |
| rs4526799 | Brain_Cerebellum | 12 | <i>RPS26</i>    | 56436876 | rs4514464  | 0.9956 | 57276375 | C | T | 0.36 | 2.92E-03 | 2.88E-02 | 1.58E-01 |
| rs4526799 | Brain_Cerebellum | 12 | <i>CS</i>       | 56679829 | rs4514464  | 0.9956 | 57276375 | C | T | 0.36 | 2.92E-03 | 3.16E-02 | 1.61E-01 |
| rs4526799 | Brain_Cerebellum | 12 | <i>MIP</i>      | 56853054 | rs4514464  | 0.9956 | 57276375 | C | T | 0.36 | 2.92E-03 | 4.42E-02 | 1.73E-01 |
| rs4526799 | Brain_Cerebellum | 12 | <i>PTGES3</i>   | 57069643 | rs4514464  | 0.9956 | 57276375 | C | T | 0.36 | 2.92E-03 | 3.11E-02 | 1.60E-01 |
| rs4526799 | Brain_Cerebellum | 12 | <i>RDH16</i>    | 57349188 | rs4514464  | 0.9956 | 57276375 | C | T | 0.36 | 2.92E-03 | 2.13E-02 | 1.49E-01 |
| rs4526799 | Brain_Cerebellum | 12 | <i>RPS26</i>    | 56436876 | rs4417325  | 0.9956 | 57277302 | G | A | 0.36 | 3.59E-03 | 2.88E-02 | 1.61E-01 |
| rs4526799 | Brain_Cerebellum | 12 | <i>CS</i>       | 56679829 | rs4417325  | 0.9956 | 57277302 | G | A | 0.36 | 3.59E-03 | 3.16E-02 | 1.64E-01 |
| rs4526799 | Brain_Cerebellum | 12 | <i>MIP</i>      | 56853054 | rs4417325  | 0.9956 | 57277302 | G | A | 0.36 | 3.59E-03 | 4.42E-02 | 1.76E-01 |
| rs4526799 | Brain_Cerebellum | 12 | <i>PTGES3</i>   | 57069643 | rs4417325  | 0.9956 | 57277302 | G | A | 0.36 | 3.59E-03 | 3.11E-02 | 1.63E-01 |
| rs4526799 | Brain_Cerebellum | 12 | <i>RDH16</i>    | 57349188 | rs4417325  | 0.9956 | 57277302 | G | A | 0.36 | 3.59E-03 | 2.13E-02 | 1.52E-01 |
| rs4526799 | Brain_Cerebellum | 12 | <i>RPS26</i>    | 56436876 | rs11172030 | 0.9956 | 57278076 | A | C | 0.36 | 3.63E-03 | 2.88E-02 | 1.61E-01 |
| rs4526799 | Brain_Cerebellum | 12 | <i>CS</i>       | 56679829 | rs11172030 | 0.9956 | 57278076 | A | C | 0.36 | 3.63E-03 | 3.16E-02 | 1.64E-01 |
| rs4526799 | Brain_Cerebellum | 12 | <i>MIP</i>      | 56853054 | rs11172030 | 0.9956 | 57278076 | A | C | 0.36 | 3.63E-03 | 4.42E-02 | 1.77E-01 |
| rs4526799 | Brain_Cerebellum | 12 | <i>PTGES3</i>   | 57069643 | rs11172030 | 0.9956 | 57278076 | A | C | 0.36 | 3.63E-03 | 3.11E-02 | 1.64E-01 |
| rs4526799 | Brain_Cerebellum | 12 | <i>RDH16</i>    | 57349188 | rs11172030 | 0.9956 | 57278076 | A | C | 0.36 | 3.63E-03 | 2.13E-02 | 1.53E-01 |
| rs4526799 | Brain_Cerebellum | 12 | <i>RPS26</i>    | 56436876 | rs10876944 | 0.9956 | 57279372 | T | A | 0.36 | 3.63E-03 | 2.88E-02 | 1.61E-01 |
| rs4526799 | Brain_Cerebellum | 12 | <i>CS</i>       | 56679829 | rs10876944 | 0.9956 | 57279372 | T | A | 0.36 | 3.63E-03 | 3.16E-02 | 1.64E-01 |
| rs4526799 | Brain_Cerebellum | 12 | <i>MIP</i>      | 56853054 | rs10876944 | 0.9956 | 57279372 | T | A | 0.36 | 3.63E-03 | 4.42E-02 | 1.77E-01 |
| rs4526799 | Brain_Cerebellum | 12 | <i>PTGES3</i>   | 57069643 | rs10876944 | 0.9956 | 57279372 | T | A | 0.36 | 3.63E-03 | 3.11E-02 | 1.64E-01 |
| rs4526799 | Brain_Cerebellum | 12 | <i>RDH16</i>    | 57349188 | rs10876944 | 0.9956 | 57279372 | T | A | 0.36 | 3.63E-03 | 2.13E-02 | 1.53E-01 |
| rs4526799 | Brain_Cerebellum | 12 | <i>RPS26</i>    | 56436876 | rs4326839  | 0.9956 | 57280374 | G | C | 0.36 | 3.58E-03 | 2.88E-02 | 1.61E-01 |
| rs4526799 | Brain_Cerebellum | 12 | <i>CS</i>       | 56679829 | rs4326839  | 0.9956 | 57280374 | G | C | 0.36 | 3.58E-03 | 3.16E-02 | 1.64E-01 |
| rs4526799 | Brain_Cerebellum | 12 | <i>MIP</i>      | 56853054 | rs4326839  | 0.9956 | 57280374 | G | C | 0.36 | 3.58E-03 | 4.42E-02 | 1.76E-01 |
| rs4526799 | Brain_Cerebellum | 12 | <i>PTGES3</i>   | 57069643 | rs4326839  | 0.9956 | 57280374 | G | C | 0.36 | 3.58E-03 | 3.11E-02 | 1.63E-01 |
| rs4526799 | Brain_Cerebellum | 12 | <i>RDH16</i>    | 57349188 | rs4326839  | 0.9956 | 57280374 | G | C | 0.36 | 3.58E-03 | 2.13E-02 | 1.52E-01 |
| rs4526799 | Brain_Cerebellum | 12 | <i>RPS26</i>    | 56436876 | rs4526799  | 1.0000 | 57280586 | T | C | 0.34 | 7.26E-06 | 2.88E-02 | 6.27E-02 |
| rs4526799 | Brain_Cerebellum | 12 | <i>CS</i>       | 56679829 | rs4526799  | 1.0000 | 57280586 | T | C | 0.34 | 7.26E-06 | 3.16E-02 | 6.59E-02 |
| rs4526799 | Brain_Cerebellum | 12 | <i>MIP</i>      | 56853054 | rs4526799  | 1.0000 | 57280586 | T | C | 0.34 | 7.26E-06 | 4.42E-02 | 8.00E-02 |
| rs4526799 | Brain_Cerebellum | 12 | <i>PTGES3</i>   | 57069643 | rs4526799  | 1.0000 | 57280586 | T | C | 0.34 | 7.26E-06 | 3.11E-02 | 6.53E-02 |

|           |                  |    |                 |          |            |        |          |   |   |      |          |          |          |
|-----------|------------------|----|-----------------|----------|------------|--------|----------|---|---|------|----------|----------|----------|
| rs4526799 | Brain_Cerebellum | 12 | <i>RDH16</i>    | 57349188 | rs4526799  | 1.0000 | 57280586 | T | C | 0.34 | 7.26E-06 | 2.13E-02 | 5.34E-02 |
| rs4526799 | Brain_Cerebellum | 12 | <i>RPS26</i>    | 56436876 | rs28876529 | 0.9956 | 57285301 | T | A | 0.36 | 2.25E-03 | 2.88E-02 | 1.46E-01 |
| rs4526799 | Brain_Cerebellum | 12 | <i>CS</i>       | 56679829 | rs28876529 | 0.9956 | 57285301 | T | A | 0.36 | 2.25E-03 | 3.16E-02 | 1.49E-01 |
| rs4526799 | Brain_Cerebellum | 12 | <i>MIP</i>      | 56853054 | rs28876529 | 0.9956 | 57285301 | T | A | 0.36 | 2.25E-03 | 4.42E-02 | 1.61E-01 |
| rs4526799 | Brain_Cerebellum | 12 | <i>PTGES3</i>   | 57069643 | rs28876529 | 0.9956 | 57285301 | T | A | 0.36 | 2.25E-03 | 3.11E-02 | 1.48E-01 |
| rs4526799 | Brain_Cerebellum | 12 | <i>RDH16</i>    | 57349188 | rs28876529 | 0.9956 | 57285301 | T | A | 0.36 | 2.25E-03 | 2.13E-02 | 1.37E-01 |
| rs4526799 | Brain_Cerebellum | 12 | <i>RPS26</i>    | 56436876 | rs11172037 | 0.9956 | 57285427 | T | A | 0.36 | 2.25E-03 | 2.88E-02 | 1.46E-01 |
| rs4526799 | Brain_Cerebellum | 12 | <i>CS</i>       | 56679829 | rs11172037 | 0.9956 | 57285427 | T | A | 0.36 | 2.25E-03 | 3.16E-02 | 1.49E-01 |
| rs4526799 | Brain_Cerebellum | 12 | <i>MIP</i>      | 56853054 | rs11172037 | 0.9956 | 57285427 | T | A | 0.36 | 2.25E-03 | 4.42E-02 | 1.61E-01 |
| rs4526799 | Brain_Cerebellum | 12 | <i>PTGES3</i>   | 57069643 | rs11172037 | 0.9956 | 57285427 | T | A | 0.36 | 2.25E-03 | 3.11E-02 | 1.48E-01 |
| rs4526799 | Brain_Cerebellum | 12 | <i>RDH16</i>    | 57349188 | rs11172037 | 0.9956 | 57285427 | T | A | 0.36 | 2.25E-03 | 2.13E-02 | 1.37E-01 |
| rs4526799 | Brain_Cerebellum | 12 | <i>RPS26</i>    | 56436876 | rs12321987 | 0.9956 | 57288449 | G | A | 0.36 | 4.47E-03 | 2.88E-02 | 1.82E-01 |
| rs4526799 | Brain_Cerebellum | 12 | <i>CS</i>       | 56679829 | rs12321987 | 0.9956 | 57288449 | G | A | 0.36 | 4.47E-03 | 3.16E-02 | 1.85E-01 |
| rs4526799 | Brain_Cerebellum | 12 | <i>MIP</i>      | 56853054 | rs12321987 | 0.9956 | 57288449 | G | A | 0.36 | 4.47E-03 | 4.42E-02 | 1.97E-01 |
| rs4526799 | Brain_Cerebellum | 12 | <i>PTGES3</i>   | 57069643 | rs12321987 | 0.9956 | 57288449 | G | A | 0.36 | 4.47E-03 | 3.11E-02 | 1.84E-01 |
| rs4526799 | Brain_Cerebellum | 12 | <i>RDH16</i>    | 57349188 | rs12321987 | 0.9956 | 57288449 | G | A | 0.36 | 4.47E-03 | 2.13E-02 | 1.74E-01 |
| rs4526799 | Brain_Cerebellum | 12 | <i>RPS26</i>    | 56436876 | rs11172043 | 0.9869 | 57293182 | G | A | 0.35 | 4.58E-03 | 1.41E-02 | 1.64E-01 |
| rs4526799 | Brain_Cerebellum | 12 | <i>ESYT1</i>    | 56530147 | rs11172043 | 0.9869 | 57293182 | G | A | 0.35 | 4.58E-03 | 1.32E-02 | 1.62E-01 |
| rs4526799 | Brain_Cerebellum | 12 | <i>CS</i>       | 56679829 | rs11172043 | 0.9869 | 57293182 | G | A | 0.35 | 4.58E-03 | 3.73E-02 | 1.89E-01 |
| rs4526799 | Brain_Cerebellum | 12 | <i>MIP</i>      | 56853054 | rs11172043 | 0.9869 | 57293182 | G | A | 0.35 | 4.58E-03 | 4.41E-02 | 1.95E-01 |
| rs4526799 | Brain_Cerebellum | 12 | <i>RDH16</i>    | 57349188 | rs11172043 | 0.9869 | 57293182 | G | A | 0.35 | 4.58E-03 | 1.61E-02 | 1.66E-01 |
| rs4526799 | Brain_Cerebellum | 12 | <i>MBD6</i>     | 57919188 | rs11172043 | 0.9869 | 57293182 | G | A | 0.35 | 4.58E-03 | 4.99E-02 | 2.00E-01 |
| rs4526799 | Brain_Cerebellum | 12 | <i>KIF5A</i>    | 57962098 | rs11172043 | 0.9869 | 57293182 | G | A | 0.35 | 4.58E-03 | 4.21E-02 | 1.93E-01 |
| rs4526799 | Brain_Cerebellum | 12 | <i>B4GALNT1</i> | 58023536 | rs11172043 | 0.9869 | 57293182 | G | A | 0.35 | 4.58E-03 | 4.63E-02 | 1.97E-01 |
| rs4526799 | Brain_Cerebellum | 12 | <i>RPS26</i>    | 56436876 | rs12426816 | 0.9869 | 57294074 | A | C | 0.35 | 4.50E-03 | 1.41E-02 | 1.63E-01 |
| rs4526799 | Brain_Cerebellum | 12 | <i>ESYT1</i>    | 56530147 | rs12426816 | 0.9869 | 57294074 | A | C | 0.35 | 4.50E-03 | 1.32E-02 | 1.62E-01 |
| rs4526799 | Brain_Cerebellum | 12 | <i>CS</i>       | 56679829 | rs12426816 | 0.9869 | 57294074 | A | C | 0.35 | 4.50E-03 | 3.73E-02 | 1.89E-01 |
| rs4526799 | Brain_Cerebellum | 12 | <i>MIP</i>      | 56853054 | rs12426816 | 0.9869 | 57294074 | A | C | 0.35 | 4.50E-03 | 4.41E-02 | 1.95E-01 |
| rs4526799 | Brain_Cerebellum | 12 | <i>RDH16</i>    | 57349188 | rs12426816 | 0.9869 | 57294074 | A | C | 0.35 | 4.50E-03 | 1.61E-02 | 1.66E-01 |
| rs4526799 | Brain_Cerebellum | 12 | <i>MBD6</i>     | 57919188 | rs12426816 | 0.9869 | 57294074 | A | C | 0.35 | 4.50E-03 | 4.99E-02 | 2.00E-01 |
| rs4526799 | Brain_Cerebellum | 12 | <i>KIF5A</i>    | 57962098 | rs12426816 | 0.9869 | 57294074 | A | C | 0.35 | 4.50E-03 | 4.21E-02 | 1.93E-01 |
| rs4526799 | Brain_Cerebellum | 12 | <i>B4GALNT1</i> | 58023536 | rs12426816 | 0.9869 | 57294074 | A | C | 0.35 | 4.50E-03 | 4.63E-02 | 1.97E-01 |
| rs4526799 | Brain_Cerebellum | 12 | <i>RPS26</i>    | 56436876 | rs11172047 | 0.9869 | 57298080 | T | C | 0.35 | 6.51E-03 | 1.41E-02 | 1.78E-01 |
| rs4526799 | Brain_Cerebellum | 12 | <i>ESYT1</i>    | 56530147 | rs11172047 | 0.9869 | 57298080 | T | C | 0.35 | 6.51E-03 | 1.32E-02 | 1.77E-01 |
| rs4526799 | Brain_Cerebellum | 12 | <i>CS</i>       | 56679829 | rs11172047 | 0.9869 | 57298080 | T | C | 0.35 | 6.51E-03 | 3.73E-02 | 2.02E-01 |
| rs4526799 | Brain_Cerebellum | 12 | <i>MIP</i>      | 56853054 | rs11172047 | 0.9869 | 57298080 | T | C | 0.35 | 6.51E-03 | 4.41E-02 | 2.08E-01 |
| rs4526799 | Brain_Cerebellum | 12 | <i>RDH16</i>    | 57349188 | rs11172047 | 0.9869 | 57298080 | T | C | 0.35 | 6.51E-03 | 1.61E-02 | 1.81E-01 |
| rs4526799 | Brain_Cerebellum | 12 | <i>MBD6</i>     | 57919188 | rs11172047 | 0.9869 | 57298080 | T | C | 0.35 | 6.51E-03 | 4.99E-02 | 2.13E-01 |
| rs4526799 | Brain_Cerebellum | 12 | <i>KIF5A</i>    | 57962098 | rs11172047 | 0.9869 | 57298080 | T | C | 0.35 | 6.51E-03 | 4.21E-02 | 2.07E-01 |
| rs4526799 | Brain_Cerebellum | 12 | <i>B4GALNT1</i> | 58023536 | rs11172047 | 0.9869 | 57298080 | T | C | 0.35 | 6.51E-03 | 4.63E-02 | 2.10E-01 |

|           |                  |    |                 |          |            |        |          |   |   |      |          |          |          |
|-----------|------------------|----|-----------------|----------|------------|--------|----------|---|---|------|----------|----------|----------|
| rs4526799 | Brain_Cerebellum | 12 | <i>RPS26</i>    | 56436876 | rs2371631  | 0.9869 | 57298614 | T | A | 0.35 | 6.32E-03 | 1.41E-02 | 1.75E-01 |
| rs4526799 | Brain_Cerebellum | 12 | <i>ESYT1</i>    | 56530147 | rs2371631  | 0.9869 | 57298614 | T | A | 0.35 | 6.32E-03 | 1.32E-02 | 1.73E-01 |
| rs4526799 | Brain_Cerebellum | 12 | <i>CS</i>       | 56679829 | rs2371631  | 0.9869 | 57298614 | T | A | 0.35 | 6.32E-03 | 3.73E-02 | 1.99E-01 |
| rs4526799 | Brain_Cerebellum | 12 | <i>MIP</i>      | 56853054 | rs2371631  | 0.9869 | 57298614 | T | A | 0.35 | 6.32E-03 | 4.41E-02 | 2.05E-01 |
| rs4526799 | Brain_Cerebellum | 12 | <i>RDH16</i>    | 57349188 | rs2371631  | 0.9869 | 57298614 | T | A | 0.35 | 6.32E-03 | 1.61E-02 | 1.77E-01 |
| rs4526799 | Brain_Cerebellum | 12 | <i>MBD6</i>     | 57919188 | rs2371631  | 0.9869 | 57298614 | T | A | 0.35 | 6.32E-03 | 4.99E-02 | 2.10E-01 |
| rs4526799 | Brain_Cerebellum | 12 | <i>KIF5A</i>    | 57962098 | rs2371631  | 0.9869 | 57298614 | T | A | 0.35 | 6.32E-03 | 4.21E-02 | 2.04E-01 |
| rs4526799 | Brain_Cerebellum | 12 | <i>B4GALNT1</i> | 58023536 | rs2371631  | 0.9869 | 57298614 | T | A | 0.35 | 6.32E-03 | 4.63E-02 | 2.07E-01 |
| rs4526799 | Brain_Cerebellum | 12 | <i>RPS26</i>    | 56436876 | rs12305763 | 0.9869 | 57299263 | G | A | 0.35 | 6.82E-03 | 1.41E-02 | 1.79E-01 |
| rs4526799 | Brain_Cerebellum | 12 | <i>ESYT1</i>    | 56530147 | rs12305763 | 0.9869 | 57299263 | G | A | 0.35 | 6.82E-03 | 1.32E-02 | 1.78E-01 |
| rs4526799 | Brain_Cerebellum | 12 | <i>CS</i>       | 56679829 | rs12305763 | 0.9869 | 57299263 | G | A | 0.35 | 6.82E-03 | 3.73E-02 | 2.04E-01 |
| rs4526799 | Brain_Cerebellum | 12 | <i>MIP</i>      | 56853054 | rs12305763 | 0.9869 | 57299263 | G | A | 0.35 | 6.82E-03 | 4.41E-02 | 2.10E-01 |
| rs4526799 | Brain_Cerebellum | 12 | <i>RDH16</i>    | 57349188 | rs12305763 | 0.9869 | 57299263 | G | A | 0.35 | 6.82E-03 | 1.61E-02 | 1.82E-01 |
| rs4526799 | Brain_Cerebellum | 12 | <i>MBD6</i>     | 57919188 | rs12305763 | 0.9869 | 57299263 | G | A | 0.35 | 6.82E-03 | 4.99E-02 | 2.14E-01 |
| rs4526799 | Brain_Cerebellum | 12 | <i>KIF5A</i>    | 57962098 | rs12305763 | 0.9869 | 57299263 | G | A | 0.35 | 6.82E-03 | 4.21E-02 | 2.08E-01 |
| rs4526799 | Brain_Cerebellum | 12 | <i>B4GALNT1</i> | 58023536 | rs12305763 | 0.9869 | 57299263 | G | A | 0.35 | 6.82E-03 | 4.63E-02 | 2.11E-01 |
| rs4526799 | Brain_Cerebellum | 12 | <i>CDK2</i>     | 56363560 | rs11172049 | 0.9128 | 57304203 | T | C | 0.35 | 1.15E-02 | 2.44E-02 | 1.92E-01 |
| rs4526799 | Brain_Cerebellum | 12 | <i>RPS26</i>    | 56436876 | rs11172049 | 0.9128 | 57304203 | T | C | 0.35 | 1.15E-02 | 2.25E-02 | 1.90E-01 |
| rs4526799 | Brain_Cerebellum | 12 | <i>ESYT1</i>    | 56530147 | rs11172049 | 0.9128 | 57304203 | T | C | 0.35 | 1.15E-02 | 1.25E-02 | 1.77E-01 |
| rs4526799 | Brain_Cerebellum | 12 | <i>CS</i>       | 56679829 | rs11172049 | 0.9128 | 57304203 | T | C | 0.35 | 1.15E-02 | 4.62E-02 | 2.12E-01 |
| rs4526799 | Brain_Cerebellum | 12 | <i>RDH16</i>    | 57349188 | rs11172049 | 0.9128 | 57304203 | T | C | 0.35 | 1.15E-02 | 1.36E-02 | 1.79E-01 |
| rs4526799 | Brain_Cerebellum | 12 | <i>MBD6</i>     | 57919188 | rs11172049 | 0.9128 | 57304203 | T | C | 0.35 | 1.15E-02 | 3.36E-02 | 2.01E-01 |
| rs4526799 | Brain_Cerebellum | 12 | <i>CDK2</i>     | 56363560 | rs1874888  | 0.9085 | 57305138 | A | C | 0.35 | 1.15E-02 | 2.44E-02 | 1.92E-01 |
| rs4526799 | Brain_Cerebellum | 12 | <i>RPS26</i>    | 56436876 | rs1874888  | 0.9085 | 57305138 | A | C | 0.35 | 1.15E-02 | 2.25E-02 | 1.90E-01 |
| rs4526799 | Brain_Cerebellum | 12 | <i>ESYT1</i>    | 56530147 | rs1874888  | 0.9085 | 57305138 | A | C | 0.35 | 1.15E-02 | 1.25E-02 | 1.77E-01 |
| rs4526799 | Brain_Cerebellum | 12 | <i>CS</i>       | 56679829 | rs1874888  | 0.9085 | 57305138 | A | C | 0.35 | 1.15E-02 | 4.62E-02 | 2.12E-01 |
| rs4526799 | Brain_Cerebellum | 12 | <i>RDH16</i>    | 57349188 | rs1874888  | 0.9085 | 57305138 | A | C | 0.35 | 1.15E-02 | 1.36E-02 | 1.79E-01 |
| rs4526799 | Brain_Cerebellum | 12 | <i>MBD6</i>     | 57919188 | rs1874888  | 0.9085 | 57305138 | A | C | 0.35 | 1.15E-02 | 3.36E-02 | 2.01E-01 |
| rs4526799 | Brain_Cerebellum | 12 | <i>ESYT1</i>    | 56530147 | rs10506349 | 0.9128 | 57306412 | T | C | 0.37 | 1.10E-02 | 3.72E-02 | 1.95E-01 |
| rs4526799 | Brain_Cerebellum | 12 | <i>MIP</i>      | 56853054 | rs10506349 | 0.9128 | 57306412 | T | C | 0.37 | 1.10E-02 | 4.85E-02 | 2.05E-01 |
| rs4526799 | Brain_Cerebellum | 12 | <i>RDH16</i>    | 57349188 | rs10506349 | 0.9128 | 57306412 | T | C | 0.37 | 1.10E-02 | 3.11E-02 | 1.89E-01 |
| rs4526799 | Brain_Cerebellum | 12 | <i>KIF5A</i>    | 57962098 | rs10506349 | 0.9128 | 57306412 | T | C | 0.37 | 1.10E-02 | 4.41E-02 | 2.01E-01 |
| rs4526799 | Brain_Cerebellum | 12 | <i>CDK2</i>     | 56363560 | rs10876951 | 0.9085 | 57306430 | T | G | 0.35 | 1.15E-02 | 2.44E-02 | 1.92E-01 |
| rs4526799 | Brain_Cerebellum | 12 | <i>RPS26</i>    | 56436876 | rs10876951 | 0.9085 | 57306430 | T | G | 0.35 | 1.15E-02 | 2.25E-02 | 1.90E-01 |
| rs4526799 | Brain_Cerebellum | 12 | <i>ESYT1</i>    | 56530147 | rs10876951 | 0.9085 | 57306430 | T | G | 0.35 | 1.15E-02 | 1.25E-02 | 1.77E-01 |
| rs4526799 | Brain_Cerebellum | 12 | <i>CS</i>       | 56679829 | rs10876951 | 0.9085 | 57306430 | T | G | 0.35 | 1.15E-02 | 4.62E-02 | 2.12E-01 |
| rs4526799 | Brain_Cerebellum | 12 | <i>RDH16</i>    | 57349188 | rs10876951 | 0.9085 | 57306430 | T | G | 0.35 | 1.15E-02 | 1.36E-02 | 1.79E-01 |
| rs4526799 | Brain_Cerebellum | 12 | <i>MBD6</i>     | 57919188 | rs10876951 | 0.9085 | 57306430 | T | G | 0.35 | 1.15E-02 | 3.36E-02 | 2.01E-01 |
| rs4526799 | Brain_Cerebellum | 12 | <i>ESYT1</i>    | 56530147 | rs10747774 | 0.9128 | 57307079 | T | C | 0.36 | 1.16E-02 | 3.72E-02 | 2.00E-01 |
| rs4526799 | Brain_Cerebellum | 12 | <i>MIP</i>      | 56853054 | rs10747774 | 0.9128 | 57307079 | T | C | 0.36 | 1.16E-02 | 4.85E-02 | 2.10E-01 |

|           |                  |    |                       |          |            |        |          |   |   |      |          |          |          |
|-----------|------------------|----|-----------------------|----------|------------|--------|----------|---|---|------|----------|----------|----------|
| rs4526799 | Brain_Cerebellum | 12 | <i>RDH16</i>          | 57349188 | rs10747774 | 0.9128 | 57307079 | T | C | 0.36 | 1.16E-02 | 3.11E-02 | 1.94E-01 |
| rs4526799 | Brain_Cerebellum | 12 | <i>KIF5A</i>          | 57962098 | rs10747774 | 0.9128 | 57307079 | T | C | 0.36 | 1.16E-02 | 4.41E-02 | 2.06E-01 |
| rs4526799 | Brain_Cerebellum | 12 | <i>CDK2</i>           | 56363560 | rs10783812 | 0.9085 | 57308723 | C | T | 0.35 | 1.19E-02 | 2.45E-02 | 1.95E-01 |
| rs4526799 | Brain_Cerebellum | 12 | <i>RPS26</i>          | 56436876 | rs10783812 | 0.9085 | 57308723 | C | T | 0.35 | 1.19E-02 | 2.21E-02 | 1.92E-01 |
| rs4526799 | Brain_Cerebellum | 12 | <i>ESYT1</i>          | 56530147 | rs10783812 | 0.9085 | 57308723 | C | T | 0.35 | 1.19E-02 | 1.27E-02 | 1.81E-01 |
| rs4526799 | Brain_Cerebellum | 12 | <i>CS</i>             | 56679829 | rs10783812 | 0.9085 | 57308723 | C | T | 0.35 | 1.19E-02 | 4.49E-02 | 2.13E-01 |
| rs4526799 | Brain_Cerebellum | 12 | <i>RDH16</i>          | 57349188 | rs10783812 | 0.9085 | 57308723 | C | T | 0.35 | 1.19E-02 | 1.30E-02 | 1.81E-01 |
| rs4526799 | Brain_Cerebellum | 12 | <i>MBD6</i>           | 57919188 | rs10783812 | 0.9085 | 57308723 | C | T | 0.35 | 1.19E-02 | 3.31E-02 | 2.03E-01 |
| rs4526799 | Brain_Cerebellum | 12 | <i>ESYT1</i>          | 56530147 | rs11172056 | 0.9089 | 57308975 | C | T | 0.37 | 1.10E-02 | 3.72E-02 | 1.95E-01 |
| rs4526799 | Brain_Cerebellum | 12 | <i>MIP</i>            | 56853054 | rs11172056 | 0.9089 | 57308975 | C | T | 0.37 | 1.10E-02 | 4.85E-02 | 2.05E-01 |
| rs4526799 | Brain_Cerebellum | 12 | <i>RDH16</i>          | 57349188 | rs11172056 | 0.9089 | 57308975 | C | T | 0.37 | 1.10E-02 | 3.11E-02 | 1.89E-01 |
| rs4526799 | Brain_Cerebellum | 12 | <i>KIF5A</i>          | 57962098 | rs11172056 | 0.9089 | 57308975 | C | T | 0.37 | 1.10E-02 | 4.41E-02 | 2.01E-01 |
| rs4526799 | Brain_Cerebellum | 12 | <i>CDK2</i>           | 56363560 | rs7302420  | 0.9085 | 57309884 | G | C | 0.36 | 1.54E-02 | 3.02E-02 | 2.16E-01 |
| rs4526799 | Brain_Cerebellum | 12 | <i>RPS26</i>          | 56436876 | rs7302420  | 0.9085 | 57309884 | G | C | 0.36 | 1.54E-02 | 3.50E-02 | 2.20E-01 |
| rs4526799 | Brain_Cerebellum | 12 | <i>ESYT1</i>          | 56530147 | rs7302420  | 0.9085 | 57309884 | G | C | 0.36 | 1.54E-02 | 1.13E-02 | 1.95E-01 |
| rs4526799 | Brain_Cerebellum | 12 | <i>RDH16</i>          | 57349188 | rs7302420  | 0.9085 | 57309884 | G | C | 0.36 | 1.54E-02 | 2.34E-02 | 2.10E-01 |
| rs4526799 | Brain_Cerebellum | 12 | <i>KIF5A</i>          | 57962098 | rs7302420  | 0.9085 | 57309884 | G | C | 0.36 | 1.54E-02 | 4.71E-02 | 2.30E-01 |
| rs4526799 | Brain_Cerebellum | 12 | <i>MIP</i>            | 56853054 | rs12228618 | 0.9128 | 57311229 | T | C | 0.37 | 1.29E-02 | 3.55E-02 | 2.02E-01 |
| rs4526799 | Brain_Cerebellum | 12 | <i>RDH16</i>          | 57349188 | rs12228618 | 0.9128 | 57311229 | T | C | 0.37 | 1.29E-02 | 2.57E-02 | 1.93E-01 |
| rs4526799 | Brain_Cerebellum | 12 | <i>KIF5A</i>          | 57962098 | rs12228618 | 0.9128 | 57311229 | T | C | 0.37 | 1.29E-02 | 3.52E-02 | 2.02E-01 |
| rs4526799 | Brain_Cerebellum | 12 | <i>RDH16</i>          | 57349188 | rs9739473  | 0.9012 | 57313335 | A | T | 0.37 | 2.65E-02 | 4.02E-02 | 2.71E-01 |
| rs4526799 | Brain_Cortex     | 12 | <i>PMEL</i>           | 56357495 | rs9919772  | 0.8450 | 57260027 | T | C | 0.33 | 1.03E-02 | 2.81E-03 | 1.83E-01 |
| rs4526799 | Brain_Cortex     | 12 | <i>RP11-977G19.11</i> | 56701259 | rs9919772  | 0.8450 | 57260027 | T | C | 0.33 | 1.03E-02 | 2.40E-02 | 2.14E-01 |
| rs4526799 | Brain_Cortex     | 12 | <i>TMEM194A</i>       | 57465636 | rs9919772  | 0.8450 | 57260027 | T | C | 0.33 | 1.03E-02 | 1.39E-02 | 2.03E-01 |
| rs4526799 | Brain_Cortex     | 12 | <i>PMEL</i>           | 56357495 | rs4495925  | 0.8650 | 57268116 | C | G | 0.33 | 1.04E-02 | 2.58E-03 | 1.78E-01 |
| rs4526799 | Brain_Cortex     | 12 | <i>RPL41</i>          | 56511048 | rs4495925  | 0.8650 | 57268116 | C | G | 0.33 | 1.04E-02 | 2.95E-02 | 2.16E-01 |
| rs4526799 | Brain_Cortex     | 12 | <i>RP11-977G19.11</i> | 56701259 | rs4495925  | 0.8650 | 57268116 | C | G | 0.33 | 1.04E-02 | 1.87E-02 | 2.05E-01 |
| rs4526799 | Brain_Cortex     | 12 | <i>TMEM194A</i>       | 57465636 | rs4495925  | 0.8650 | 57268116 | C | G | 0.33 | 1.04E-02 | 1.35E-02 | 1.99E-01 |
| rs4526799 | Brain_Cortex     | 12 | <i>PMEL</i>           | 56357495 | rs4471472  | 0.8650 | 57268985 | A | G | 0.32 | 9.99E-03 | 2.58E-03 | 1.74E-01 |
| rs4526799 | Brain_Cortex     | 12 | <i>RPL41</i>          | 56511048 | rs4471472  | 0.8650 | 57268985 | A | G | 0.32 | 9.99E-03 | 2.95E-02 | 2.12E-01 |
| rs4526799 | Brain_Cortex     | 12 | <i>RP11-977G19.11</i> | 56701259 | rs4471472  | 0.8650 | 57268985 | A | G | 0.32 | 9.99E-03 | 1.87E-02 | 2.01E-01 |
| rs4526799 | Brain_Cortex     | 12 | <i>TMEM194A</i>       | 57465636 | rs4471472  | 0.8650 | 57268985 | A | G | 0.32 | 9.99E-03 | 1.35E-02 | 1.95E-01 |
| rs4526799 | Brain_Cortex     | 12 | <i>PMEL</i>           | 56357495 | rs4633499  | 0.8610 | 57269264 | A | T | 0.32 | 1.43E-02 | 4.15E-03 | 2.17E-01 |
| rs4526799 | Brain_Cortex     | 12 | <i>RPS26</i>          | 56436876 | rs4633499  | 0.8610 | 57269264 | A | T | 0.32 | 1.43E-02 | 3.45E-02 | 2.51E-01 |
| rs4526799 | Brain_Cortex     | 12 | <i>RPL41</i>          | 56511048 | rs4633499  | 0.8610 | 57269264 | A | T | 0.32 | 1.43E-02 | 1.81E-02 | 2.36E-01 |
| rs4526799 | Brain_Cortex     | 12 | <i>RP11-977G19.11</i> | 56701259 | rs4633499  | 0.8610 | 57269264 | A | T | 0.32 | 1.43E-02 | 4.31E-03 | 2.17E-01 |
| rs4526799 | Brain_Cortex     | 12 | <i>TIMELESS</i>       | 56827045 | rs4633499  | 0.8610 | 57269264 | A | T | 0.32 | 1.43E-02 | 4.64E-02 | 2.60E-01 |
| rs4526799 | Brain_Cortex     | 12 | <i>TMEM194A</i>       | 57465636 | rs4633499  | 0.8610 | 57269264 | A | T | 0.32 | 1.43E-02 | 3.63E-02 | 2.52E-01 |
| rs4526799 | Brain_Cortex     | 12 | <i>WIBG</i>           | 56310770 | rs12300079 | 0.9956 | 57273194 | T | C | 0.36 | 3.73E-03 | 3.72E-02 | 1.72E-01 |
| rs4526799 | Brain_Cortex     | 12 | <i>PMEL</i>           | 56357495 | rs12300079 | 0.9956 | 57273194 | T | C | 0.36 | 3.73E-03 | 2.36E-03 | 1.20E-01 |

|           |              |    |                |          |            |        |          |   |   |      |          |          |          |
|-----------|--------------|----|----------------|----------|------------|--------|----------|---|---|------|----------|----------|----------|
| rs4526799 | Brain_Cortex | 12 | STAC3          | 57641106 | rs12300079 | 0.9956 | 57273194 | T | C | 0.36 | 3.73E-03 | 4.54E-02 | 1.79E-01 |
| rs4526799 | Brain_Cortex | 12 | WIBG           | 56310770 | rs12300191 | 0.9956 | 57273289 | A | G | 0.36 | 3.59E-03 | 3.72E-02 | 1.70E-01 |
| rs4526799 | Brain_Cortex | 12 | PMEL           | 56357495 | rs12300191 | 0.9956 | 57273289 | A | G | 0.36 | 3.59E-03 | 2.36E-03 | 1.17E-01 |
| rs4526799 | Brain_Cortex | 12 | STAC3          | 57641106 | rs12300191 | 0.9956 | 57273289 | A | G | 0.36 | 3.59E-03 | 4.54E-02 | 1.77E-01 |
| rs4526799 | Brain_Cortex | 12 | WIBG           | 56310770 | rs4514464  | 0.9956 | 57276375 | C | T | 0.36 | 2.92E-03 | 3.72E-02 | 1.67E-01 |
| rs4526799 | Brain_Cortex | 12 | PMEL           | 56357495 | rs4514464  | 0.9956 | 57276375 | C | T | 0.36 | 2.92E-03 | 2.36E-03 | 1.14E-01 |
| rs4526799 | Brain_Cortex | 12 | STAC3          | 57641106 | rs4514464  | 0.9956 | 57276375 | C | T | 0.36 | 2.92E-03 | 4.54E-02 | 1.74E-01 |
| rs4526799 | Brain_Cortex | 12 | WIBG           | 56310770 | rs4417325  | 0.9956 | 57277302 | G | A | 0.36 | 3.59E-03 | 3.72E-02 | 1.70E-01 |
| rs4526799 | Brain_Cortex | 12 | PMEL           | 56357495 | rs4417325  | 0.9956 | 57277302 | G | A | 0.36 | 3.59E-03 | 2.36E-03 | 1.17E-01 |
| rs4526799 | Brain_Cortex | 12 | STAC3          | 57641106 | rs4417325  | 0.9956 | 57277302 | G | A | 0.36 | 3.59E-03 | 4.54E-02 | 1.77E-01 |
| rs4526799 | Brain_Cortex | 12 | WIBG           | 56310770 | rs11172030 | 0.9956 | 57278076 | A | C | 0.36 | 3.63E-03 | 3.72E-02 | 1.70E-01 |
| rs4526799 | Brain_Cortex | 12 | PMEL           | 56357495 | rs11172030 | 0.9956 | 57278076 | A | C | 0.36 | 3.63E-03 | 2.36E-03 | 1.18E-01 |
| rs4526799 | Brain_Cortex | 12 | STAC3          | 57641106 | rs11172030 | 0.9956 | 57278076 | A | C | 0.36 | 3.63E-03 | 4.54E-02 | 1.78E-01 |
| rs4526799 | Brain_Cortex | 12 | WIBG           | 56310770 | rs10876944 | 0.9956 | 57279372 | T | A | 0.36 | 3.63E-03 | 3.72E-02 | 1.70E-01 |
| rs4526799 | Brain_Cortex | 12 | PMEL           | 56357495 | rs10876944 | 0.9956 | 57279372 | T | A | 0.36 | 3.63E-03 | 2.36E-03 | 1.18E-01 |
| rs4526799 | Brain_Cortex | 12 | STAC3          | 57641106 | rs10876944 | 0.9956 | 57279372 | T | A | 0.36 | 3.63E-03 | 4.54E-02 | 1.78E-01 |
| rs4526799 | Brain_Cortex | 12 | WIBG           | 56310770 | rs4326839  | 0.9956 | 57280374 | G | C | 0.36 | 3.58E-03 | 3.72E-02 | 1.69E-01 |
| rs4526799 | Brain_Cortex | 12 | PMEL           | 56357495 | rs4326839  | 0.9956 | 57280374 | G | C | 0.36 | 3.58E-03 | 2.36E-03 | 1.17E-01 |
| rs4526799 | Brain_Cortex | 12 | STAC3          | 57641106 | rs4326839  | 0.9956 | 57280374 | G | C | 0.36 | 3.58E-03 | 4.54E-02 | 1.77E-01 |
| rs4526799 | Brain_Cortex | 12 | WIBG           | 56310770 | rs4526799  | 1.0000 | 57280586 | T | C | 0.34 | 7.26E-06 | 3.72E-02 | 7.24E-02 |
| rs4526799 | Brain_Cortex | 12 | PMEL           | 56357495 | rs4526799  | 1.0000 | 57280586 | T | C | 0.34 | 7.26E-06 | 2.36E-03 | 2.09E-02 |
| rs4526799 | Brain_Cortex | 12 | STAC3          | 57641106 | rs4526799  | 1.0000 | 57280586 | T | C | 0.34 | 7.26E-06 | 4.54E-02 | 8.12E-02 |
| rs4526799 | Brain_Cortex | 12 | WIBG           | 56310770 | rs28876529 | 0.9956 | 57285301 | T | A | 0.36 | 2.25E-03 | 3.72E-02 | 1.55E-01 |
| rs4526799 | Brain_Cortex | 12 | PMEL           | 56357495 | rs28876529 | 0.9956 | 57285301 | T | A | 0.36 | 2.25E-03 | 2.36E-03 | 1.01E-01 |
| rs4526799 | Brain_Cortex | 12 | STAC3          | 57641106 | rs28876529 | 0.9956 | 57285301 | T | A | 0.36 | 2.25E-03 | 4.54E-02 | 1.62E-01 |
| rs4526799 | Brain_Cortex | 12 | WIBG           | 56310770 | rs11172037 | 0.9956 | 57285427 | T | A | 0.36 | 2.25E-03 | 3.72E-02 | 1.55E-01 |
| rs4526799 | Brain_Cortex | 12 | PMEL           | 56357495 | rs11172037 | 0.9956 | 57285427 | T | A | 0.36 | 2.25E-03 | 2.36E-03 | 1.01E-01 |
| rs4526799 | Brain_Cortex | 12 | STAC3          | 57641106 | rs11172037 | 0.9956 | 57285427 | T | A | 0.36 | 2.25E-03 | 4.54E-02 | 1.62E-01 |
| rs4526799 | Brain_Cortex | 12 | WIBG           | 56310770 | rs12321987 | 0.9956 | 57288449 | G | A | 0.36 | 4.47E-03 | 3.53E-02 | 1.89E-01 |
| rs4526799 | Brain_Cortex | 12 | PMEL           | 56357495 | rs12321987 | 0.9956 | 57288449 | G | A | 0.36 | 4.47E-03 | 2.39E-03 | 1.41E-01 |
| rs4526799 | Brain_Cortex | 12 | STAC3          | 57641106 | rs12321987 | 0.9956 | 57288449 | G | A | 0.36 | 4.47E-03 | 4.52E-02 | 1.97E-01 |
| rs4526799 | Brain_Cortex | 12 | WIBG           | 56310770 | rs11172043 | 0.9869 | 57293182 | G | A | 0.35 | 4.58E-03 | 3.51E-02 | 1.87E-01 |
| rs4526799 | Brain_Cortex | 12 | PMEL           | 56357495 | rs11172043 | 0.9869 | 57293182 | G | A | 0.35 | 4.58E-03 | 1.58E-02 | 1.66E-01 |
| rs4526799 | Brain_Cortex | 12 | RPS26          | 56436876 | rs11172043 | 0.9869 | 57293182 | G | A | 0.35 | 4.58E-03 | 4.02E-02 | 1.92E-01 |
| rs4526799 | Brain_Cortex | 12 | ANKRD52        | 56641903 | rs11172043 | 0.9869 | 57293182 | G | A | 0.35 | 4.58E-03 | 4.17E-02 | 1.93E-01 |
| rs4526799 | Brain_Cortex | 12 | RP11-977G19.11 | 56701259 | rs11172043 | 0.9869 | 57293182 | G | A | 0.35 | 4.58E-03 | 2.64E-02 | 1.78E-01 |
| rs4526799 | Brain_Cortex | 12 | TIMELESS       | 56827045 | rs11172043 | 0.9869 | 57293182 | G | A | 0.35 | 4.58E-03 | 2.07E-02 | 1.72E-01 |
| rs4526799 | Brain_Cortex | 12 | SHMT2          | 57625897 | rs11172043 | 0.9869 | 57293182 | G | A | 0.35 | 4.58E-03 | 4.26E-02 | 1.94E-01 |
| rs4526799 | Brain_Cortex | 12 | STAC3          | 57641106 | rs11172043 | 0.9869 | 57293182 | G | A | 0.35 | 4.58E-03 | 3.17E-02 | 1.84E-01 |
| rs4526799 | Brain_Cortex | 12 | WIBG           | 56310770 | rs12426816 | 0.9869 | 57294074 | A | C | 0.35 | 4.50E-03 | 3.51E-02 | 1.87E-01 |



|           |              |    |                |          |            |        |          |   |   |      |          |          |          |
|-----------|--------------|----|----------------|----------|------------|--------|----------|---|---|------|----------|----------|----------|
| rs4526799 | Brain_Cortex | 12 | PMEL           | 56357495 | rs12426816 | 0.9869 | 57294074 | A | C | 0.35 | 4.50E-03 | 1.58E-02 | 1.65E-01 |
| rs4526799 | Brain_Cortex | 12 | RPS26          | 56436876 | rs12426816 | 0.9869 | 57294074 | A | C | 0.35 | 4.50E-03 | 4.02E-02 | 1.91E-01 |
| rs4526799 | Brain_Cortex | 12 | ANKRD52        | 56641903 | rs12426816 | 0.9869 | 57294074 | A | C | 0.35 | 4.50E-03 | 4.17E-02 | 1.93E-01 |
| rs4526799 | Brain_Cortex | 12 | RP11-977G19.11 | 56701259 | rs12426816 | 0.9869 | 57294074 | A | C | 0.35 | 4.50E-03 | 2.64E-02 | 1.78E-01 |
| rs4526799 | Brain_Cortex | 12 | TIMELESS       | 56827045 | rs12426816 | 0.9869 | 57294074 | A | C | 0.35 | 4.50E-03 | 2.07E-02 | 1.72E-01 |
| rs4526799 | Brain_Cortex | 12 | SHMT2          | 57625897 | rs12426816 | 0.9869 | 57294074 | A | C | 0.35 | 4.50E-03 | 4.26E-02 | 1.94E-01 |
| rs4526799 | Brain_Cortex | 12 | STAC3          | 57641106 | rs12426816 | 0.9869 | 57294074 | A | C | 0.35 | 4.50E-03 | 3.17E-02 | 1.83E-01 |
| rs4526799 | Brain_Cortex | 12 | WIBG           | 56310770 | rs11172047 | 0.9869 | 57298080 | T | C | 0.35 | 6.51E-03 | 3.51E-02 | 2.00E-01 |
| rs4526799 | Brain_Cortex | 12 | PMEL           | 56357495 | rs11172047 | 0.9869 | 57298080 | T | C | 0.35 | 6.51E-03 | 1.58E-02 | 1.80E-01 |
| rs4526799 | Brain_Cortex | 12 | RPS26          | 56436876 | rs11172047 | 0.9869 | 57298080 | T | C | 0.35 | 6.51E-03 | 4.02E-02 | 2.05E-01 |
| rs4526799 | Brain_Cortex | 12 | ANKRD52        | 56641903 | rs11172047 | 0.9869 | 57298080 | T | C | 0.35 | 6.51E-03 | 4.17E-02 | 2.06E-01 |
| rs4526799 | Brain_Cortex | 12 | RP11-977G19.11 | 56701259 | rs11172047 | 0.9869 | 57298080 | T | C | 0.35 | 6.51E-03 | 2.64E-02 | 1.92E-01 |
| rs4526799 | Brain_Cortex | 12 | TIMELESS       | 56827045 | rs11172047 | 0.9869 | 57298080 | T | C | 0.35 | 6.51E-03 | 2.07E-02 | 1.86E-01 |
| rs4526799 | Brain_Cortex | 12 | SHMT2          | 57625897 | rs11172047 | 0.9869 | 57298080 | T | C | 0.35 | 6.51E-03 | 4.26E-02 | 2.07E-01 |
| rs4526799 | Brain_Cortex | 12 | STAC3          | 57641106 | rs11172047 | 0.9869 | 57298080 | T | C | 0.35 | 6.51E-03 | 3.17E-02 | 1.97E-01 |
| rs4526799 | Brain_Cortex | 12 | WIBG           | 56310770 | rs2371631  | 0.9869 | 57298614 | T | A | 0.35 | 6.32E-03 | 3.51E-02 | 1.97E-01 |
| rs4526799 | Brain_Cortex | 12 | PMEL           | 56357495 | rs2371631  | 0.9869 | 57298614 | T | A | 0.35 | 6.32E-03 | 1.58E-02 | 1.77E-01 |
| rs4526799 | Brain_Cortex | 12 | RPS26          | 56436876 | rs2371631  | 0.9869 | 57298614 | T | A | 0.35 | 6.32E-03 | 4.02E-02 | 2.02E-01 |
| rs4526799 | Brain_Cortex | 12 | ANKRD52        | 56641903 | rs2371631  | 0.9869 | 57298614 | T | A | 0.35 | 6.32E-03 | 4.17E-02 | 2.03E-01 |
| rs4526799 | Brain_Cortex | 12 | RP11-977G19.11 | 56701259 | rs2371631  | 0.9869 | 57298614 | T | A | 0.35 | 6.32E-03 | 2.64E-02 | 1.89E-01 |
| rs4526799 | Brain_Cortex | 12 | TIMELESS       | 56827045 | rs2371631  | 0.9869 | 57298614 | T | A | 0.35 | 6.32E-03 | 2.07E-02 | 1.83E-01 |
| rs4526799 | Brain_Cortex | 12 | SHMT2          | 57625897 | rs2371631  | 0.9869 | 57298614 | T | A | 0.35 | 6.32E-03 | 4.26E-02 | 2.04E-01 |
| rs4526799 | Brain_Cortex | 12 | STAC3          | 57641106 | rs2371631  | 0.9869 | 57298614 | T | A | 0.35 | 6.32E-03 | 3.17E-02 | 1.94E-01 |
| rs4526799 | Brain_Cortex | 12 | WIBG           | 56310770 | rs12305763 | 0.9869 | 57299263 | G | A | 0.35 | 6.82E-03 | 3.51E-02 | 2.02E-01 |
| rs4526799 | Brain_Cortex | 12 | PMEL           | 56357495 | rs12305763 | 0.9869 | 57299263 | G | A | 0.35 | 6.82E-03 | 1.58E-02 | 1.81E-01 |
| rs4526799 | Brain_Cortex | 12 | RPS26          | 56436876 | rs12305763 | 0.9869 | 57299263 | G | A | 0.35 | 6.82E-03 | 4.02E-02 | 2.06E-01 |
| rs4526799 | Brain_Cortex | 12 | ANKRD52        | 56641903 | rs12305763 | 0.9869 | 57299263 | G | A | 0.35 | 6.82E-03 | 4.17E-02 | 2.08E-01 |
| rs4526799 | Brain_Cortex | 12 | RP11-977G19.11 | 56701259 | rs12305763 | 0.9869 | 57299263 | G | A | 0.35 | 6.82E-03 | 2.64E-02 | 1.93E-01 |
| rs4526799 | Brain_Cortex | 12 | TIMELESS       | 56827045 | rs12305763 | 0.9869 | 57299263 | G | A | 0.35 | 6.82E-03 | 2.07E-02 | 1.87E-01 |
| rs4526799 | Brain_Cortex | 12 | SHMT2          | 57625897 | rs12305763 | 0.9869 | 57299263 | G | A | 0.35 | 6.82E-03 | 4.26E-02 | 2.08E-01 |
| rs4526799 | Brain_Cortex | 12 | STAC3          | 57641106 | rs12305763 | 0.9869 | 57299263 | G | A | 0.35 | 6.82E-03 | 3.17E-02 | 1.99E-01 |
| rs4526799 | Brain_Cortex | 12 | WIBG           | 56310770 | rs11172049 | 0.9128 | 57304203 | T | C | 0.35 | 1.15E-02 | 2.10E-02 | 1.88E-01 |
| rs4526799 | Brain_Cortex | 12 | PMEL           | 56357495 | rs11172049 | 0.9128 | 57304203 | T | C | 0.35 | 1.15E-02 | 1.10E-02 | 1.75E-01 |
| rs4526799 | Brain_Cortex | 12 | ANKRD52        | 56641903 | rs11172049 | 0.9128 | 57304203 | T | C | 0.35 | 1.15E-02 | 4.02E-02 | 2.06E-01 |
| rs4526799 | Brain_Cortex | 12 | RP11-977G19.11 | 56701259 | rs11172049 | 0.9128 | 57304203 | T | C | 0.35 | 1.15E-02 | 5.70E-03 | 1.65E-01 |
| rs4526799 | Brain_Cortex | 12 | TIMELESS       | 56827045 | rs11172049 | 0.9128 | 57304203 | T | C | 0.35 | 1.15E-02 | 3.24E-02 | 1.99E-01 |
| rs4526799 | Brain_Cortex | 12 | MBD6           | 57919188 | rs11172049 | 0.9128 | 57304203 | T | C | 0.35 | 1.15E-02 | 3.27E-02 | 2.00E-01 |
| rs4526799 | Brain_Cortex | 12 | WIBG           | 56310770 | rs1874888  | 0.9085 | 57305138 | A | C | 0.35 | 1.15E-02 | 2.10E-02 | 1.88E-01 |
| rs4526799 | Brain_Cortex | 12 | PMEL           | 56357495 | rs1874888  | 0.9085 | 57305138 | A | C | 0.35 | 1.15E-02 | 1.10E-02 | 1.75E-01 |
| rs4526799 | Brain_Cortex | 12 | ANKRD52        | 56641903 | rs1874888  | 0.9085 | 57305138 | A | C | 0.35 | 1.15E-02 | 4.02E-02 | 2.06E-01 |

|           |              |    |                |          |            |        |          |   |   |      |          |          |          |
|-----------|--------------|----|----------------|----------|------------|--------|----------|---|---|------|----------|----------|----------|
| rs4526799 | Brain_Cortex | 12 | RP11-977G19.11 | 56701259 | rs1874888  | 0.9085 | 57305138 | A | C | 0.35 | 1.15E-02 | 5.70E-03 | 1.65E-01 |
| rs4526799 | Brain_Cortex | 12 | TIMELESS       | 56827045 | rs1874888  | 0.9085 | 57305138 | A | C | 0.35 | 1.15E-02 | 3.24E-02 | 1.99E-01 |
| rs4526799 | Brain_Cortex | 12 | MBD6           | 57919188 | rs1874888  | 0.9085 | 57305138 | A | C | 0.35 | 1.15E-02 | 3.27E-02 | 2.00E-01 |
| rs4526799 | Brain_Cortex | 12 | WIBG           | 56310770 | rs10506349 | 0.9128 | 57306412 | T | C | 0.37 | 1.10E-02 | 1.32E-02 | 1.69E-01 |
| rs4526799 | Brain_Cortex | 12 | PMEL           | 56357495 | rs10506349 | 0.9128 | 57306412 | T | C | 0.37 | 1.10E-02 | 4.67E-02 | 2.03E-01 |
| rs4526799 | Brain_Cortex | 12 | RP11-977G19.11 | 56701259 | rs10506349 | 0.9128 | 57306412 | T | C | 0.37 | 1.10E-02 | 1.48E-02 | 1.71E-01 |
| rs4526799 | Brain_Cortex | 12 | MBD6           | 57919188 | rs10506349 | 0.9128 | 57306412 | T | C | 0.37 | 1.10E-02 | 3.56E-02 | 1.93E-01 |
| rs4526799 | Brain_Cortex | 12 | WIBG           | 56310770 | rs10876951 | 0.9085 | 57306430 | T | G | 0.35 | 1.15E-02 | 2.10E-02 | 1.88E-01 |
| rs4526799 | Brain_Cortex | 12 | PMEL           | 56357495 | rs10876951 | 0.9085 | 57306430 | T | G | 0.35 | 1.15E-02 | 1.10E-02 | 1.75E-01 |
| rs4526799 | Brain_Cortex | 12 | ANKRD52        | 56641903 | rs10876951 | 0.9085 | 57306430 | T | G | 0.35 | 1.15E-02 | 4.02E-02 | 2.06E-01 |
| rs4526799 | Brain_Cortex | 12 | RP11-977G19.11 | 56701259 | rs10876951 | 0.9085 | 57306430 | T | G | 0.35 | 1.15E-02 | 5.70E-03 | 1.65E-01 |
| rs4526799 | Brain_Cortex | 12 | TIMELESS       | 56827045 | rs10876951 | 0.9085 | 57306430 | T | G | 0.35 | 1.15E-02 | 3.24E-02 | 1.99E-01 |
| rs4526799 | Brain_Cortex | 12 | MBD6           | 57919188 | rs10876951 | 0.9085 | 57306430 | T | G | 0.35 | 1.15E-02 | 3.27E-02 | 2.00E-01 |
| rs4526799 | Brain_Cortex | 12 | WIBG           | 56310770 | rs10747774 | 0.9128 | 57307079 | T | C | 0.36 | 1.16E-02 | 1.28E-02 | 1.73E-01 |
| rs4526799 | Brain_Cortex | 12 | RP11-977G19.11 | 56701259 | rs10747774 | 0.9128 | 57307079 | T | C | 0.36 | 1.16E-02 | 1.44E-02 | 1.76E-01 |
| rs4526799 | Brain_Cortex | 12 | MBD6           | 57919188 | rs10747774 | 0.9128 | 57307079 | T | C | 0.36 | 1.16E-02 | 3.16E-02 | 1.95E-01 |
| rs4526799 | Brain_Cortex | 12 | WIBG           | 56310770 | rs10783812 | 0.9085 | 57308723 | C | T | 0.35 | 1.19E-02 | 1.68E-02 | 1.86E-01 |
| rs4526799 | Brain_Cortex | 12 | PMEL           | 56357495 | rs10783812 | 0.9085 | 57308723 | C | T | 0.35 | 1.19E-02 | 1.23E-02 | 1.80E-01 |
| rs4526799 | Brain_Cortex | 12 | ANKRD52        | 56641903 | rs10783812 | 0.9085 | 57308723 | C | T | 0.35 | 1.19E-02 | 4.02E-02 | 2.09E-01 |
| rs4526799 | Brain_Cortex | 12 | RP11-977G19.11 | 56701259 | rs10783812 | 0.9085 | 57308723 | C | T | 0.35 | 1.19E-02 | 5.38E-03 | 1.68E-01 |
| rs4526799 | Brain_Cortex | 12 | TIMELESS       | 56827045 | rs10783812 | 0.9085 | 57308723 | C | T | 0.35 | 1.19E-02 | 2.74E-02 | 1.98E-01 |
| rs4526799 | Brain_Cortex | 12 | MBD6           | 57919188 | rs10783812 | 0.9085 | 57308723 | C | T | 0.35 | 1.19E-02 | 3.61E-02 | 2.06E-01 |
| rs4526799 | Brain_Cortex | 12 | WIBG           | 56310770 | rs11172056 | 0.9089 | 57308975 | C | T | 0.37 | 1.10E-02 | 1.28E-02 | 1.68E-01 |
| rs4526799 | Brain_Cortex | 12 | RP11-977G19.11 | 56701259 | rs11172056 | 0.9089 | 57308975 | C | T | 0.37 | 1.10E-02 | 1.44E-02 | 1.71E-01 |
| rs4526799 | Brain_Cortex | 12 | MBD6           | 57919188 | rs11172056 | 0.9089 | 57308975 | C | T | 0.37 | 1.10E-02 | 3.16E-02 | 1.90E-01 |
| rs4526799 | Brain_Cortex | 12 | WIBG           | 56310770 | rs7302420  | 0.9085 | 57309884 | G | C | 0.36 | 1.54E-02 | 2.91E-02 | 2.15E-01 |
| rs4526799 | Brain_Cortex | 12 | PMEL           | 56357495 | rs7302420  | 0.9085 | 57309884 | G | C | 0.36 | 1.54E-02 | 1.47E-02 | 2.00E-01 |
| rs4526799 | Brain_Cortex | 12 | ANKRD52        | 56641903 | rs7302420  | 0.9085 | 57309884 | G | C | 0.36 | 1.54E-02 | 4.90E-02 | 2.32E-01 |
| rs4526799 | Brain_Cortex | 12 | RP11-977G19.11 | 56701259 | rs7302420  | 0.9085 | 57309884 | G | C | 0.36 | 1.54E-02 | 3.00E-03 | 1.79E-01 |
| rs4526799 | Brain_Cortex | 12 | TIMELESS       | 56827045 | rs7302420  | 0.9085 | 57309884 | G | C | 0.36 | 1.54E-02 | 2.73E-02 | 2.13E-01 |
| rs4526799 | Brain_Cortex | 12 | SHMT2          | 57625897 | rs7302420  | 0.9085 | 57309884 | G | C | 0.36 | 1.54E-02 | 3.44E-02 | 2.20E-01 |
| rs4526799 | Brain_Cortex | 12 | MBD6           | 57919188 | rs7302420  | 0.9085 | 57309884 | G | C | 0.36 | 1.54E-02 | 2.99E-02 | 2.16E-01 |
| rs4526799 | Brain_Cortex | 12 | WIBG           | 56310770 | rs12228618 | 0.9128 | 57311229 | T | C | 0.37 | 1.29E-02 | 2.02E-02 | 1.87E-01 |
| rs4526799 | Brain_Cortex | 12 | PMEL           | 56357495 | rs12228618 | 0.9128 | 57311229 | T | C | 0.37 | 1.29E-02 | 2.79E-02 | 1.95E-01 |
| rs4526799 | Brain_Cortex | 12 | RP11-977G19.11 | 56701259 | rs12228618 | 0.9128 | 57311229 | T | C | 0.37 | 1.29E-02 | 2.60E-02 | 1.93E-01 |
| rs4526799 | Brain_Cortex | 12 | MBD6           | 57919188 | rs12228618 | 0.9128 | 57311229 | T | C | 0.37 | 1.29E-02 | 1.51E-02 | 1.80E-01 |
| rs4526799 | Brain_Cortex | 12 | WIBG           | 56310770 | rs9739473  | 0.9012 | 57313335 | A | T | 0.37 | 2.65E-02 | 1.27E-02 | 2.48E-01 |
| rs4526799 | Brain_Cortex | 12 | PMEL           | 56357495 | rs9739473  | 0.9012 | 57313335 | A | T | 0.37 | 2.65E-02 | 1.97E-02 | 2.55E-01 |
| rs4526799 | Brain_Cortex | 12 | CDK2           | 56363560 | rs9739473  | 0.9012 | 57313335 | A | T | 0.37 | 2.65E-02 | 3.46E-02 | 2.67E-01 |
| rs4526799 | Brain_Cortex | 12 | RP11-977G19.11 | 56701259 | rs9739473  | 0.9012 | 57313335 | A | T | 0.37 | 2.65E-02 | 1.48E-02 | 2.51E-01 |

|           |                          |    |                       |          |            |        |          |   |   |      |          |          |          |
|-----------|--------------------------|----|-----------------------|----------|------------|--------|----------|---|---|------|----------|----------|----------|
| rs4526799 | Brain_Cortex             | 12 | <i>MBD6</i>           | 57919188 | rs9739473  | 0.9012 | 57313335 | A | T | 0.37 | 2.65E-02 | 2.52E-02 | 2.60E-01 |
| rs4526799 | Brain_Frontal_Cortex_BA9 | 12 | <i>IKZF4</i>          | 56416831 | rs9919772  | 0.8450 | 57260027 | T | C | 0.33 | 1.03E-02 | 4.11E-02 | 2.29E-01 |
| rs4526799 | Brain_Frontal_Cortex_BA9 | 12 | <i>RPS26</i>          | 56436876 | rs9919772  | 0.8450 | 57260027 | T | C | 0.33 | 1.03E-02 | 2.61E-02 | 2.16E-01 |
| rs4526799 | Brain_Frontal_Cortex_BA9 | 12 | <i>COQ10A</i>         | 56662696 | rs9919772  | 0.8450 | 57260027 | T | C | 0.33 | 1.03E-02 | 2.80E-02 | 2.18E-01 |
| rs4526799 | Brain_Frontal_Cortex_BA9 | 12 | <i>RP11-977G19.11</i> | 56701259 | rs9919772  | 0.8450 | 57260027 | T | C | 0.33 | 1.03E-02 | 7.01E-04 | 1.73E-01 |
| rs4526799 | Brain_Frontal_Cortex_BA9 | 12 | <i>DTX3</i>           | 58000996 | rs9919772  | 0.8450 | 57260027 | T | C | 0.33 | 1.03E-02 | 1.57E-02 | 2.05E-01 |
| rs4526799 | Brain_Frontal_Cortex_BA9 | 12 | <i>IKZF4</i>          | 56416831 | rs4495925  | 0.8650 | 57268116 | C | G | 0.33 | 1.04E-02 | 2.79E-02 | 2.15E-01 |
| rs4526799 | Brain_Frontal_Cortex_BA9 | 12 | <i>RPS26</i>          | 56436876 | rs4495925  | 0.8650 | 57268116 | C | G | 0.33 | 1.04E-02 | 1.37E-02 | 1.99E-01 |
| rs4526799 | Brain_Frontal_Cortex_BA9 | 12 | <i>COQ10A</i>         | 56662696 | rs4495925  | 0.8650 | 57268116 | C | G | 0.33 | 1.04E-02 | 2.86E-02 | 2.15E-01 |
| rs4526799 | Brain_Frontal_Cortex_BA9 | 12 | <i>RP11-977G19.11</i> | 56701259 | rs4495925  | 0.8650 | 57268116 | C | G | 0.33 | 1.04E-02 | 1.90E-03 | 1.76E-01 |
| rs4526799 | Brain_Frontal_Cortex_BA9 | 12 | <i>INHBE</i>          | 57849584 | rs4495925  | 0.8650 | 57268116 | C | G | 0.33 | 1.04E-02 | 2.67E-02 | 2.13E-01 |
| rs4526799 | Brain_Frontal_Cortex_BA9 | 12 | <i>DTX3</i>           | 58000996 | rs4495925  | 0.8650 | 57268116 | C | G | 0.33 | 1.04E-02 | 1.57E-02 | 2.02E-01 |
| rs4526799 | Brain_Frontal_Cortex_BA9 | 12 | <i>IKZF4</i>          | 56416831 | rs4471472  | 0.8650 | 57268985 | A | G | 0.32 | 9.99E-03 | 2.79E-02 | 2.11E-01 |
| rs4526799 | Brain_Frontal_Cortex_BA9 | 12 | <i>RPS26</i>          | 56436876 | rs4471472  | 0.8650 | 57268985 | A | G | 0.32 | 9.99E-03 | 1.37E-02 | 1.95E-01 |
| rs4526799 | Brain_Frontal_Cortex_BA9 | 12 | <i>COQ10A</i>         | 56662696 | rs4471472  | 0.8650 | 57268985 | A | G | 0.32 | 9.99E-03 | 2.86E-02 | 2.11E-01 |
| rs4526799 | Brain_Frontal_Cortex_BA9 | 12 | <i>RP11-977G19.11</i> | 56701259 | rs4471472  | 0.8650 | 57268985 | A | G | 0.32 | 9.99E-03 | 1.90E-03 | 1.72E-01 |
| rs4526799 | Brain_Frontal_Cortex_BA9 | 12 | <i>INHBE</i>          | 57849584 | rs4471472  | 0.8650 | 57268985 | A | G | 0.32 | 9.99E-03 | 2.67E-02 | 2.10E-01 |
| rs4526799 | Brain_Frontal_Cortex_BA9 | 12 | <i>DTX3</i>           | 58000996 | rs4471472  | 0.8650 | 57268985 | A | G | 0.32 | 9.99E-03 | 1.57E-02 | 1.98E-01 |
| rs4526799 | Brain_Frontal_Cortex_BA9 | 12 | <i>IKZF4</i>          | 56416831 | rs4633499  | 0.8610 | 57269264 | A | T | 0.32 | 1.43E-02 | 1.87E-02 | 2.37E-01 |
| rs4526799 | Brain_Frontal_Cortex_BA9 | 12 | <i>RPS26</i>          | 56436876 | rs4633499  | 0.8610 | 57269264 | A | T | 0.32 | 1.43E-02 | 7.78E-03 | 2.24E-01 |
| rs4526799 | Brain_Frontal_Cortex_BA9 | 12 | <i>COQ10A</i>         | 56662696 | rs4633499  | 0.8610 | 57269264 | A | T | 0.32 | 1.43E-02 | 3.91E-02 | 2.54E-01 |
| rs4526799 | Brain_Frontal_Cortex_BA9 | 12 | <i>RP11-977G19.11</i> | 56701259 | rs4633499  | 0.8610 | 57269264 | A | T | 0.32 | 1.43E-02 | 1.43E-03 | 2.09E-01 |
| rs4526799 | Brain_Frontal_Cortex_BA9 | 12 | <i>INHBE</i>          | 57849584 | rs4633499  | 0.8610 | 57269264 | A | T | 0.32 | 1.43E-02 | 3.25E-02 | 2.49E-01 |
| rs4526799 | Brain_Frontal_Cortex_BA9 | 12 | <i>DTX3</i>           | 58000996 | rs4633499  | 0.8610 | 57269264 | A | T | 0.32 | 1.43E-02 | 8.36E-03 | 2.25E-01 |
| rs4526799 | Brain_Frontal_Cortex_BA9 | 12 | <i>IKZF4</i>          | 56416831 | rs12300079 | 0.9956 | 57273194 | T | C | 0.36 | 3.73E-03 | 2.25E-02 | 1.56E-01 |
| rs4526799 | Brain_Frontal_Cortex_BA9 | 12 | <i>COQ10A</i>         | 56662696 | rs12300079 | 0.9956 | 57273194 | T | C | 0.36 | 3.73E-03 | 4.18E-02 | 1.76E-01 |
| rs4526799 | Brain_Frontal_Cortex_BA9 | 12 | <i>RP11-977G19.11</i> | 56701259 | rs12300079 | 0.9956 | 57273194 | T | C | 0.36 | 3.73E-03 | 2.17E-02 | 1.55E-01 |
| rs4526799 | Brain_Frontal_Cortex_BA9 | 12 | <i>IKZF4</i>          | 56416831 | rs12300191 | 0.9956 | 57273289 | A | G | 0.36 | 3.59E-03 | 2.60E-02 | 1.58E-01 |
| rs4526799 | Brain_Frontal_Cortex_BA9 | 12 | <i>COQ10A</i>         | 56662696 | rs12300191 | 0.9956 | 57273289 | A | G | 0.36 | 3.59E-03 | 4.08E-02 | 1.73E-01 |
| rs4526799 | Brain_Frontal_Cortex_BA9 | 12 | <i>RP11-977G19.11</i> | 56701259 | rs12300191 | 0.9956 | 57273289 | A | G | 0.36 | 3.59E-03 | 1.96E-02 | 1.50E-01 |
| rs4526799 | Brain_Frontal_Cortex_BA9 | 12 | <i>IKZF4</i>          | 56416831 | rs4514464  | 0.9956 | 57276375 | C | T | 0.36 | 2.92E-03 | 2.60E-02 | 1.55E-01 |
| rs4526799 | Brain_Frontal_Cortex_BA9 | 12 | <i>COQ10A</i>         | 56662696 | rs4514464  | 0.9956 | 57276375 | C | T | 0.36 | 2.92E-03 | 4.08E-02 | 1.70E-01 |
| rs4526799 | Brain_Frontal_Cortex_BA9 | 12 | <i>RP11-977G19.11</i> | 56701259 | rs4514464  | 0.9956 | 57276375 | C | T | 0.36 | 2.92E-03 | 1.96E-02 | 1.47E-01 |
| rs4526799 | Brain_Frontal_Cortex_BA9 | 12 | <i>IKZF4</i>          | 56416831 | rs4417325  | 0.9956 | 57277302 | G | A | 0.36 | 3.59E-03 | 2.60E-02 | 1.58E-01 |
| rs4526799 | Brain_Frontal_Cortex_BA9 | 12 | <i>COQ10A</i>         | 56662696 | rs4417325  | 0.9956 | 57277302 | G | A | 0.36 | 3.59E-03 | 4.08E-02 | 1.73E-01 |
| rs4526799 | Brain_Frontal_Cortex_BA9 | 12 | <i>RP11-977G19.11</i> | 56701259 | rs4417325  | 0.9956 | 57277302 | G | A | 0.36 | 3.59E-03 | 1.96E-02 | 1.50E-01 |
| rs4526799 | Brain_Frontal_Cortex_BA9 | 12 | <i>IKZF4</i>          | 56416831 | rs11172030 | 0.9956 | 57278076 | A | C | 0.36 | 3.63E-03 | 2.60E-02 | 1.58E-01 |
| rs4526799 | Brain_Frontal_Cortex_BA9 | 12 | <i>COQ10A</i>         | 56662696 | rs11172030 | 0.9956 | 57278076 | A | C | 0.36 | 3.63E-03 | 4.08E-02 | 1.73E-01 |
| rs4526799 | Brain_Frontal_Cortex_BA9 | 12 | <i>RP11-977G19.11</i> | 56701259 | rs11172030 | 0.9956 | 57278076 | A | C | 0.36 | 3.63E-03 | 1.96E-02 | 1.51E-01 |
| rs4526799 | Brain_Frontal_Cortex_BA9 | 12 | <i>IKZF4</i>          | 56416831 | rs10876944 | 0.9956 | 57279372 | T | A | 0.36 | 3.63E-03 | 2.60E-02 | 1.58E-01 |

|           |                          |    |                |          |            |        |          |   |   |      |          |          |          |
|-----------|--------------------------|----|----------------|----------|------------|--------|----------|---|---|------|----------|----------|----------|
| rs4526799 | Brain_Frontal_Cortex_BA9 | 12 | COQ10A         | 56662696 | rs10876944 | 0.9956 | 57279372 | T | A | 0.36 | 3.63E-03 | 4.08E-02 | 1.73E-01 |
| rs4526799 | Brain_Frontal_Cortex_BA9 | 12 | RP11-977G19.11 | 56701259 | rs10876944 | 0.9956 | 57279372 | T | A | 0.36 | 3.63E-03 | 1.96E-02 | 1.51E-01 |
| rs4526799 | Brain_Frontal_Cortex_BA9 | 12 | IKZF4          | 56416831 | rs4326839  | 0.9956 | 57280374 | G | C | 0.36 | 3.58E-03 | 2.60E-02 | 1.58E-01 |
| rs4526799 | Brain_Frontal_Cortex_BA9 | 12 | COQ10A         | 56662696 | rs4326839  | 0.9956 | 57280374 | G | C | 0.36 | 3.58E-03 | 4.08E-02 | 1.73E-01 |
| rs4526799 | Brain_Frontal_Cortex_BA9 | 12 | RP11-977G19.11 | 56701259 | rs4326839  | 0.9956 | 57280374 | G | C | 0.36 | 3.58E-03 | 1.96E-02 | 1.50E-01 |
| rs4526799 | Brain_Frontal_Cortex_BA9 | 12 | IKZF4          | 56416831 | rs4526799  | 1.0000 | 57280586 | T | C | 0.34 | 7.26E-06 | 2.60E-02 | 5.92E-02 |
| rs4526799 | Brain_Frontal_Cortex_BA9 | 12 | COQ10A         | 56662696 | rs4526799  | 1.0000 | 57280586 | T | C | 0.34 | 7.26E-06 | 4.08E-02 | 7.63E-02 |
| rs4526799 | Brain_Frontal_Cortex_BA9 | 12 | RP11-977G19.11 | 56701259 | rs4526799  | 1.0000 | 57280586 | T | C | 0.34 | 7.26E-06 | 1.96E-02 | 5.11E-02 |
| rs4526799 | Brain_Frontal_Cortex_BA9 | 12 | IKZF4          | 56416831 | rs28876529 | 0.9956 | 57285301 | T | A | 0.36 | 2.25E-03 | 2.60E-02 | 1.42E-01 |
| rs4526799 | Brain_Frontal_Cortex_BA9 | 12 | COQ10A         | 56662696 | rs28876529 | 0.9956 | 57285301 | T | A | 0.36 | 2.25E-03 | 4.08E-02 | 1.58E-01 |
| rs4526799 | Brain_Frontal_Cortex_BA9 | 12 | RP11-977G19.11 | 56701259 | rs28876529 | 0.9956 | 57285301 | T | A | 0.36 | 2.25E-03 | 1.96E-02 | 1.34E-01 |
| rs4526799 | Brain_Frontal_Cortex_BA9 | 12 | IKZF4          | 56416831 | rs11172037 | 0.9956 | 57285427 | T | A | 0.36 | 2.25E-03 | 2.60E-02 | 1.42E-01 |
| rs4526799 | Brain_Frontal_Cortex_BA9 | 12 | COQ10A         | 56662696 | rs11172037 | 0.9956 | 57285427 | T | A | 0.36 | 2.25E-03 | 4.08E-02 | 1.58E-01 |
| rs4526799 | Brain_Frontal_Cortex_BA9 | 12 | RP11-977G19.11 | 56701259 | rs11172037 | 0.9956 | 57285427 | T | A | 0.36 | 2.25E-03 | 1.96E-02 | 1.34E-01 |
| rs4526799 | Brain_Frontal_Cortex_BA9 | 12 | IKZF4          | 56416831 | rs12321987 | 0.9956 | 57288449 | G | A | 0.36 | 4.47E-03 | 2.60E-02 | 1.79E-01 |
| rs4526799 | Brain_Frontal_Cortex_BA9 | 12 | COQ10A         | 56662696 | rs12321987 | 0.9956 | 57288449 | G | A | 0.36 | 4.47E-03 | 4.08E-02 | 1.94E-01 |
| rs4526799 | Brain_Frontal_Cortex_BA9 | 12 | RP11-977G19.11 | 56701259 | rs12321987 | 0.9956 | 57288449 | G | A | 0.36 | 4.47E-03 | 1.96E-02 | 1.72E-01 |
| rs4526799 | Brain_Frontal_Cortex_BA9 | 12 | IKZF4          | 56416831 | rs11172043 | 0.9869 | 57293182 | G | A | 0.35 | 4.58E-03 | 1.78E-02 | 1.68E-01 |
| rs4526799 | Brain_Frontal_Cortex_BA9 | 12 | RP11-977G19.11 | 56701259 | rs11172043 | 0.9869 | 57293182 | G | A | 0.35 | 4.58E-03 | 1.74E-02 | 1.68E-01 |
| rs4526799 | Brain_Frontal_Cortex_BA9 | 12 | INHBE          | 57849584 | rs11172043 | 0.9869 | 57293182 | G | A | 0.35 | 4.58E-03 | 4.03E-02 | 1.92E-01 |
| rs4526799 | Brain_Frontal_Cortex_BA9 | 12 | RP11-571M6.17  | 58197909 | rs11172043 | 0.9869 | 57293182 | G | A | 0.35 | 4.58E-03 | 4.47E-02 | 1.96E-01 |
| rs4526799 | Brain_Frontal_Cortex_BA9 | 12 | IKZF4          | 56416831 | rs12426816 | 0.9869 | 57294074 | A | C | 0.35 | 4.50E-03 | 1.78E-02 | 1.68E-01 |
| rs4526799 | Brain_Frontal_Cortex_BA9 | 12 | RP11-977G19.11 | 56701259 | rs12426816 | 0.9869 | 57294074 | A | C | 0.35 | 4.50E-03 | 1.74E-02 | 1.68E-01 |
| rs4526799 | Brain_Frontal_Cortex_BA9 | 12 | INHBE          | 57849584 | rs12426816 | 0.9869 | 57294074 | A | C | 0.35 | 4.50E-03 | 4.03E-02 | 1.91E-01 |
| rs4526799 | Brain_Frontal_Cortex_BA9 | 12 | RP11-571M6.17  | 58197909 | rs12426816 | 0.9869 | 57294074 | A | C | 0.35 | 4.50E-03 | 4.47E-02 | 1.95E-01 |
| rs4526799 | Brain_Frontal_Cortex_BA9 | 12 | IKZF4          | 56416831 | rs11172047 | 0.9869 | 57298080 | T | C | 0.35 | 6.51E-03 | 1.78E-02 | 1.83E-01 |
| rs4526799 | Brain_Frontal_Cortex_BA9 | 12 | RP11-977G19.11 | 56701259 | rs11172047 | 0.9869 | 57298080 | T | C | 0.35 | 6.51E-03 | 1.74E-02 | 1.82E-01 |
| rs4526799 | Brain_Frontal_Cortex_BA9 | 12 | INHBE          | 57849584 | rs11172047 | 0.9869 | 57298080 | T | C | 0.35 | 6.51E-03 | 4.03E-02 | 2.05E-01 |
| rs4526799 | Brain_Frontal_Cortex_BA9 | 12 | RP11-571M6.17  | 58197909 | rs11172047 | 0.9869 | 57298080 | T | C | 0.35 | 6.51E-03 | 4.47E-02 | 2.09E-01 |
| rs4526799 | Brain_Frontal_Cortex_BA9 | 12 | IKZF4          | 56416831 | rs2371631  | 0.9869 | 57298614 | T | A | 0.35 | 6.32E-03 | 1.78E-02 | 1.79E-01 |
| rs4526799 | Brain_Frontal_Cortex_BA9 | 12 | RP11-977G19.11 | 56701259 | rs2371631  | 0.9869 | 57298614 | T | A | 0.35 | 6.32E-03 | 1.74E-02 | 1.79E-01 |
| rs4526799 | Brain_Frontal_Cortex_BA9 | 12 | INHBE          | 57849584 | rs2371631  | 0.9869 | 57298614 | T | A | 0.35 | 6.32E-03 | 4.03E-02 | 2.02E-01 |
| rs4526799 | Brain_Frontal_Cortex_BA9 | 12 | RP11-571M6.17  | 58197909 | rs2371631  | 0.9869 | 57298614 | T | A | 0.35 | 6.32E-03 | 4.47E-02 | 2.06E-01 |
| rs4526799 | Brain_Frontal_Cortex_BA9 | 12 | IKZF4          | 56416831 | rs12305763 | 0.9869 | 57299263 | G | A | 0.35 | 6.82E-03 | 1.78E-02 | 1.84E-01 |
| rs4526799 | Brain_Frontal_Cortex_BA9 | 12 | RP11-977G19.11 | 56701259 | rs12305763 | 0.9869 | 57299263 | G | A | 0.35 | 6.82E-03 | 1.74E-02 | 1.84E-01 |
| rs4526799 | Brain_Frontal_Cortex_BA9 | 12 | INHBE          | 57849584 | rs12305763 | 0.9869 | 57299263 | G | A | 0.35 | 6.82E-03 | 4.03E-02 | 2.06E-01 |
| rs4526799 | Brain_Frontal_Cortex_BA9 | 12 | RP11-571M6.17  | 58197909 | rs12305763 | 0.9869 | 57299263 | G | A | 0.35 | 6.82E-03 | 4.47E-02 | 2.10E-01 |
| rs4526799 | Brain_Frontal_Cortex_BA9 | 12 | IKZF4          | 56416831 | rs11172049 | 0.9128 | 57304203 | T | C | 0.35 | 1.15E-02 | 4.29E-02 | 2.09E-01 |
| rs4526799 | Brain_Frontal_Cortex_BA9 | 12 | RP11-977G19.11 | 56701259 | rs11172049 | 0.9128 | 57304203 | T | C | 0.35 | 1.15E-02 | 2.76E-02 | 1.95E-01 |
| rs4526799 | Brain_Frontal_Cortex_BA9 | 12 | TAC3           | 57413225 | rs11172049 | 0.9128 | 57304203 | T | C | 0.35 | 1.15E-02 | 2.80E-02 | 1.95E-01 |

|           |                          |    |                       |          |            |        |          |   |   |      |          |          |          |
|-----------|--------------------------|----|-----------------------|----------|------------|--------|----------|---|---|------|----------|----------|----------|
| rs4526799 | Brain_Frontal_Cortex_BA9 | 12 | <i>NXPH4</i>          | 57615405 | rs11172049 | 0.9128 | 57304203 | T | C | 0.35 | 1.15E-02 | 3.71E-02 | 2.04E-01 |
| rs4526799 | Brain_Frontal_Cortex_BA9 | 12 | <i>DTX3</i>           | 58000996 | rs11172049 | 0.9128 | 57304203 | T | C | 0.35 | 1.15E-02 | 1.54E-02 | 1.81E-01 |
| rs4526799 | Brain_Frontal_Cortex_BA9 | 12 | <i>IKZF4</i>          | 56416831 | rs1874888  | 0.9085 | 57305138 | A | C | 0.35 | 1.15E-02 | 4.29E-02 | 2.09E-01 |
| rs4526799 | Brain_Frontal_Cortex_BA9 | 12 | <i>RP11-977G19.11</i> | 56701259 | rs1874888  | 0.9085 | 57305138 | A | C | 0.35 | 1.15E-02 | 2.76E-02 | 1.95E-01 |
| rs4526799 | Brain_Frontal_Cortex_BA9 | 12 | <i>TAC3</i>           | 57413225 | rs1874888  | 0.9085 | 57305138 | A | C | 0.35 | 1.15E-02 | 2.80E-02 | 1.95E-01 |
| rs4526799 | Brain_Frontal_Cortex_BA9 | 12 | <i>NXPH4</i>          | 57615405 | rs1874888  | 0.9085 | 57305138 | A | C | 0.35 | 1.15E-02 | 3.71E-02 | 2.04E-01 |
| rs4526799 | Brain_Frontal_Cortex_BA9 | 12 | <i>DTX3</i>           | 58000996 | rs1874888  | 0.9085 | 57305138 | A | C | 0.35 | 1.15E-02 | 1.54E-02 | 1.81E-01 |
| rs4526799 | Brain_Frontal_Cortex_BA9 | 12 | <i>IKZF4</i>          | 56416831 | rs10506349 | 0.9128 | 57306412 | T | C | 0.37 | 1.10E-02 | 3.03E-02 | 1.88E-01 |
| rs4526799 | Brain_Frontal_Cortex_BA9 | 12 | <i>RP11-977G19.11</i> | 56701259 | rs10506349 | 0.9128 | 57306412 | T | C | 0.37 | 1.10E-02 | 2.72E-02 | 1.85E-01 |
| rs4526799 | Brain_Frontal_Cortex_BA9 | 12 | <i>NXPH4</i>          | 57615405 | rs10506349 | 0.9128 | 57306412 | T | C | 0.37 | 1.10E-02 | 3.11E-02 | 1.89E-01 |
| rs4526799 | Brain_Frontal_Cortex_BA9 | 12 | <i>DTX3</i>           | 58000996 | rs10506349 | 0.9128 | 57306412 | T | C | 0.37 | 1.10E-02 | 1.93E-02 | 1.77E-01 |
| rs4526799 | Brain_Frontal_Cortex_BA9 | 12 | <i>IKZF4</i>          | 56416831 | rs10876951 | 0.9085 | 57306430 | T | G | 0.35 | 1.15E-02 | 4.29E-02 | 2.09E-01 |
| rs4526799 | Brain_Frontal_Cortex_BA9 | 12 | <i>RP11-977G19.11</i> | 56701259 | rs10876951 | 0.9085 | 57306430 | T | G | 0.35 | 1.15E-02 | 2.76E-02 | 1.95E-01 |
| rs4526799 | Brain_Frontal_Cortex_BA9 | 12 | <i>TAC3</i>           | 57413225 | rs10876951 | 0.9085 | 57306430 | T | G | 0.35 | 1.15E-02 | 2.80E-02 | 1.95E-01 |
| rs4526799 | Brain_Frontal_Cortex_BA9 | 12 | <i>NXPH4</i>          | 57615405 | rs10876951 | 0.9085 | 57306430 | T | G | 0.35 | 1.15E-02 | 3.71E-02 | 2.04E-01 |
| rs4526799 | Brain_Frontal_Cortex_BA9 | 12 | <i>DTX3</i>           | 58000996 | rs10876951 | 0.9085 | 57306430 | T | G | 0.35 | 1.15E-02 | 1.54E-02 | 1.81E-01 |
| rs4526799 | Brain_Frontal_Cortex_BA9 | 12 | <i>IKZF4</i>          | 56416831 | rs10747774 | 0.9128 | 57307079 | T | C | 0.36 | 1.16E-02 | 2.99E-02 | 1.93E-01 |
| rs4526799 | Brain_Frontal_Cortex_BA9 | 12 | <i>RP11-977G19.11</i> | 56701259 | rs10747774 | 0.9128 | 57307079 | T | C | 0.36 | 1.16E-02 | 2.75E-02 | 1.91E-01 |
| rs4526799 | Brain_Frontal_Cortex_BA9 | 12 | <i>NXPH4</i>          | 57615405 | rs10747774 | 0.9128 | 57307079 | T | C | 0.36 | 1.16E-02 | 2.81E-02 | 1.91E-01 |
| rs4526799 | Brain_Frontal_Cortex_BA9 | 12 | <i>DTX3</i>           | 58000996 | rs10747774 | 0.9128 | 57307079 | T | C | 0.36 | 1.16E-02 | 1.92E-02 | 1.82E-01 |
| rs4526799 | Brain_Frontal_Cortex_BA9 | 12 | <i>IKZF4</i>          | 56416831 | rs10783812 | 0.9085 | 57308723 | C | T | 0.35 | 1.19E-02 | 4.29E-02 | 2.12E-01 |
| rs4526799 | Brain_Frontal_Cortex_BA9 | 12 | <i>RP11-977G19.11</i> | 56701259 | rs10783812 | 0.9085 | 57308723 | C | T | 0.35 | 1.19E-02 | 2.76E-02 | 1.98E-01 |
| rs4526799 | Brain_Frontal_Cortex_BA9 | 12 | <i>TAC3</i>           | 57413225 | rs10783812 | 0.9085 | 57308723 | C | T | 0.35 | 1.19E-02 | 2.80E-02 | 1.98E-01 |
| rs4526799 | Brain_Frontal_Cortex_BA9 | 12 | <i>NXPH4</i>          | 57615405 | rs10783812 | 0.9085 | 57308723 | C | T | 0.35 | 1.19E-02 | 3.71E-02 | 2.07E-01 |
| rs4526799 | Brain_Frontal_Cortex_BA9 | 12 | <i>DTX3</i>           | 58000996 | rs10783812 | 0.9085 | 57308723 | C | T | 0.35 | 1.19E-02 | 1.54E-02 | 1.84E-01 |
| rs4526799 | Brain_Frontal_Cortex_BA9 | 12 | <i>IKZF4</i>          | 56416831 | rs11172056 | 0.9089 | 57308975 | C | T | 0.37 | 1.10E-02 | 2.99E-02 | 1.88E-01 |
| rs4526799 | Brain_Frontal_Cortex_BA9 | 12 | <i>RP11-977G19.11</i> | 56701259 | rs11172056 | 0.9089 | 57308975 | C | T | 0.37 | 1.10E-02 | 2.75E-02 | 1.86E-01 |
| rs4526799 | Brain_Frontal_Cortex_BA9 | 12 | <i>NXPH4</i>          | 57615405 | rs11172056 | 0.9089 | 57308975 | C | T | 0.37 | 1.10E-02 | 2.81E-02 | 1.86E-01 |
| rs4526799 | Brain_Frontal_Cortex_BA9 | 12 | <i>DTX3</i>           | 58000996 | rs11172056 | 0.9089 | 57308975 | C | T | 0.37 | 1.10E-02 | 1.92E-02 | 1.77E-01 |
| rs4526799 | Brain_Frontal_Cortex_BA9 | 12 | <i>IKZF4</i>          | 56416831 | rs7302420  | 0.9085 | 57309884 | G | C | 0.36 | 1.54E-02 | 4.37E-02 | 2.27E-01 |
| rs4526799 | Brain_Frontal_Cortex_BA9 | 12 | <i>RP11-977G19.11</i> | 56701259 | rs7302420  | 0.9085 | 57309884 | G | C | 0.36 | 1.54E-02 | 2.29E-02 | 2.09E-01 |
| rs4526799 | Brain_Frontal_Cortex_BA9 | 12 | <i>TAC3</i>           | 57413225 | rs7302420  | 0.9085 | 57309884 | G | C | 0.36 | 1.54E-02 | 4.40E-02 | 2.28E-01 |
| rs4526799 | Brain_Frontal_Cortex_BA9 | 12 | <i>NXPH4</i>          | 57615405 | rs7302420  | 0.9085 | 57309884 | G | C | 0.36 | 1.54E-02 | 1.32E-02 | 1.98E-01 |
| rs4526799 | Brain_Frontal_Cortex_BA9 | 12 | <i>DTX3</i>           | 58000996 | rs7302420  | 0.9085 | 57309884 | G | C | 0.36 | 1.54E-02 | 2.50E-02 | 2.11E-01 |
| rs4526799 | Brain_Frontal_Cortex_BA9 | 12 | <i>RP11-977G19.11</i> | 56701259 | rs12228618 | 0.9128 | 57311229 | T | C | 0.37 | 1.29E-02 | 3.39E-02 | 2.00E-01 |
| rs4526799 | Brain_Frontal_Cortex_BA9 | 12 | <i>DTX3</i>           | 58000996 | rs12228618 | 0.9128 | 57311229 | T | C | 0.37 | 1.29E-02 | 9.43E-03 | 1.72E-01 |
| rs4526799 | Brain_Frontal_Cortex_BA9 | 12 | <i>IKZF4</i>          | 56416831 | rs9739473  | 0.9012 | 57313335 | A | T | 0.37 | 2.65E-02 | 3.91E-02 | 2.71E-01 |
| rs4526799 | Brain_Frontal_Cortex_BA9 | 12 | <i>RP11-977G19.11</i> | 56701259 | rs9739473  | 0.9012 | 57313335 | A | T | 0.37 | 2.65E-02 | 2.25E-02 | 2.58E-01 |
| rs4526799 | Brain_Frontal_Cortex_BA9 | 12 | <i>NXPH4</i>          | 57615405 | rs9739473  | 0.9012 | 57313335 | A | T | 0.37 | 2.65E-02 | 3.44E-02 | 2.67E-01 |
| rs4526799 | Brain_Frontal_Cortex_BA9 | 12 | <i>DTX3</i>           | 58000996 | rs9739473  | 0.9012 | 57313335 | A | T | 0.37 | 2.65E-02 | 1.71E-02 | 2.53E-01 |

|           |                   |    |                      |          |            |        |          |   |   |      |          |          |          |
|-----------|-------------------|----|----------------------|----------|------------|--------|----------|---|---|------|----------|----------|----------|
| rs4526799 | Brain_Hippocampus | 12 | <i>RP11-603J24.5</i> | 56518610 | rs9919772  | 0.8450 | 57260027 | T | C | 0.33 | 1.03E-02 | 3.83E-02 | 2.26E-01 |
| rs4526799 | Brain_Hippocampus | 12 | <i>RP11-977G19.5</i> | 56570105 | rs9919772  | 0.8450 | 57260027 | T | C | 0.33 | 1.03E-02 | 1.82E-02 | 2.08E-01 |
| rs4526799 | Brain_Hippocampus | 12 | <i>RNF41</i>         | 56607001 | rs9919772  | 0.8450 | 57260027 | T | C | 0.33 | 1.03E-02 | 9.09E-03 | 1.96E-01 |
| rs4526799 | Brain_Hippocampus | 12 | <i>GLS2</i>          | 56873481 | rs9919772  | 0.8450 | 57260027 | T | C | 0.33 | 1.03E-02 | 2.02E-02 | 2.10E-01 |
| rs4526799 | Brain_Hippocampus | 12 | <i>RBMS2</i>         | 56950229 | rs9919772  | 0.8450 | 57260027 | T | C | 0.33 | 1.03E-02 | 1.61E-02 | 2.05E-01 |
| rs4526799 | Brain_Hippocampus | 12 | <i>TMEM194A</i>      | 57465636 | rs9919772  | 0.8450 | 57260027 | T | C | 0.33 | 1.03E-02 | 2.54E-02 | 2.15E-01 |
| rs4526799 | Brain_Hippocampus | 12 | <i>DCTN2</i>         | 57932523 | rs9919772  | 0.8450 | 57260027 | T | C | 0.33 | 1.03E-02 | 3.56E-02 | 2.24E-01 |
| rs4526799 | Brain_Hippocampus | 12 | <i>METTL1</i>        | 58164318 | rs9919772  | 0.8450 | 57260027 | T | C | 0.33 | 1.03E-02 | 2.21E-02 | 2.12E-01 |
| rs4526799 | Brain_Hippocampus | 12 | <i>RP11-603J24.5</i> | 56518610 | rs4495925  | 0.8650 | 57268116 | C | G | 0.33 | 1.04E-02 | 4.79E-02 | 2.31E-01 |
| rs4526799 | Brain_Hippocampus | 12 | <i>RP11-977G19.5</i> | 56570105 | rs4495925  | 0.8650 | 57268116 | C | G | 0.33 | 1.04E-02 | 9.22E-03 | 1.93E-01 |
| rs4526799 | Brain_Hippocampus | 12 | <i>RNF41</i>         | 56607001 | rs4495925  | 0.8650 | 57268116 | C | G | 0.33 | 1.04E-02 | 7.01E-03 | 1.89E-01 |
| rs4526799 | Brain_Hippocampus | 12 | <i>SPRYD4</i>        | 56863518 | rs4495925  | 0.8650 | 57268116 | C | G | 0.33 | 1.04E-02 | 4.57E-02 | 2.30E-01 |
| rs4526799 | Brain_Hippocampus | 12 | <i>GLS2</i>          | 56873481 | rs4495925  | 0.8650 | 57268116 | C | G | 0.33 | 1.04E-02 | 2.37E-02 | 2.11E-01 |
| rs4526799 | Brain_Hippocampus | 12 | <i>RBMS2</i>         | 56950229 | rs4495925  | 0.8650 | 57268116 | C | G | 0.33 | 1.04E-02 | 1.82E-02 | 2.05E-01 |
| rs4526799 | Brain_Hippocampus | 12 | <i>METTL1</i>        | 58164318 | rs4495925  | 0.8650 | 57268116 | C | G | 0.33 | 1.04E-02 | 2.18E-02 | 2.09E-01 |
| rs4526799 | Brain_Hippocampus | 12 | <i>RP11-603J24.5</i> | 56518610 | rs4471472  | 0.8650 | 57268985 | A | G | 0.32 | 9.99E-03 | 4.79E-02 | 2.28E-01 |
| rs4526799 | Brain_Hippocampus | 12 | <i>RP11-977G19.5</i> | 56570105 | rs4471472  | 0.8650 | 57268985 | A | G | 0.32 | 9.99E-03 | 9.22E-03 | 1.89E-01 |
| rs4526799 | Brain_Hippocampus | 12 | <i>RNF41</i>         | 56607001 | rs4471472  | 0.8650 | 57268985 | A | G | 0.32 | 9.99E-03 | 7.01E-03 | 1.85E-01 |
| rs4526799 | Brain_Hippocampus | 12 | <i>SPRYD4</i>        | 56863518 | rs4471472  | 0.8650 | 57268985 | A | G | 0.32 | 9.99E-03 | 4.57E-02 | 2.26E-01 |
| rs4526799 | Brain_Hippocampus | 12 | <i>GLS2</i>          | 56873481 | rs4471472  | 0.8650 | 57268985 | A | G | 0.32 | 9.99E-03 | 2.37E-02 | 2.07E-01 |
| rs4526799 | Brain_Hippocampus | 12 | <i>RBMS2</i>         | 56950229 | rs4471472  | 0.8650 | 57268985 | A | G | 0.32 | 9.99E-03 | 1.82E-02 | 2.01E-01 |
| rs4526799 | Brain_Hippocampus | 12 | <i>METTL1</i>        | 58164318 | rs4471472  | 0.8650 | 57268985 | A | G | 0.32 | 9.99E-03 | 2.18E-02 | 2.05E-01 |
| rs4526799 | Brain_Hippocampus | 12 | <i>RP11-977G19.5</i> | 56570105 | rs4633499  | 0.8610 | 57269264 | A | T | 0.32 | 1.43E-02 | 1.56E-02 | 2.34E-01 |
| rs4526799 | Brain_Hippocampus | 12 | <i>RNF41</i>         | 56607001 | rs4633499  | 0.8610 | 57269264 | A | T | 0.32 | 1.43E-02 | 6.29E-03 | 2.21E-01 |
| rs4526799 | Brain_Hippocampus | 12 | <i>SPRYD4</i>        | 56863518 | rs4633499  | 0.8610 | 57269264 | A | T | 0.32 | 1.43E-02 | 2.77E-02 | 2.45E-01 |
| rs4526799 | Brain_Hippocampus | 12 | <i>GLS2</i>          | 56873481 | rs4633499  | 0.8610 | 57269264 | A | T | 0.32 | 1.43E-02 | 4.26E-02 | 2.57E-01 |
| rs4526799 | Brain_Hippocampus | 12 | <i>RBMS2</i>         | 56950229 | rs4633499  | 0.8610 | 57269264 | A | T | 0.32 | 1.43E-02 | 3.20E-02 | 2.49E-01 |
| rs4526799 | Brain_Hippocampus | 12 | <i>METTL1</i>        | 58164318 | rs4633499  | 0.8610 | 57269264 | A | T | 0.32 | 1.43E-02 | 2.19E-02 | 2.40E-01 |
| rs4526799 | Brain_Hippocampus | 12 | <i>RAB5B</i>         | 56378093 | rs12300079 | 0.9956 | 57273194 | T | C | 0.36 | 3.73E-03 | 2.48E-02 | 1.59E-01 |
| rs4526799 | Brain_Hippocampus | 12 | <i>RNF41</i>         | 56607001 | rs12300079 | 0.9956 | 57273194 | T | C | 0.36 | 3.73E-03 | 2.32E-02 | 1.57E-01 |
| rs4526799 | Brain_Hippocampus | 12 | <i>ANKRD52</i>       | 56641903 | rs12300079 | 0.9956 | 57273194 | T | C | 0.36 | 3.73E-03 | 3.06E-02 | 1.65E-01 |
| rs4526799 | Brain_Hippocampus | 12 | <i>ZBTB39</i>        | 57396424 | rs12300079 | 0.9956 | 57273194 | T | C | 0.36 | 3.73E-03 | 4.04E-02 | 1.75E-01 |
| rs4526799 | Brain_Hippocampus | 12 | <i>METTL1</i>        | 58164318 | rs12300079 | 0.9956 | 57273194 | T | C | 0.36 | 3.73E-03 | 8.61E-03 | 1.36E-01 |
| rs4526799 | Brain_Hippocampus | 12 | <i>RAB5B</i>         | 56378093 | rs12300191 | 0.9956 | 57273289 | A | G | 0.36 | 3.59E-03 | 2.48E-02 | 1.57E-01 |
| rs4526799 | Brain_Hippocampus | 12 | <i>RNF41</i>         | 56607001 | rs12300191 | 0.9956 | 57273289 | A | G | 0.36 | 3.59E-03 | 2.32E-02 | 1.55E-01 |
| rs4526799 | Brain_Hippocampus | 12 | <i>ANKRD52</i>       | 56641903 | rs12300191 | 0.9956 | 57273289 | A | G | 0.36 | 3.59E-03 | 3.06E-02 | 1.63E-01 |
| rs4526799 | Brain_Hippocampus | 12 | <i>ZBTB39</i>        | 57396424 | rs12300191 | 0.9956 | 57273289 | A | G | 0.36 | 3.59E-03 | 4.04E-02 | 1.73E-01 |
| rs4526799 | Brain_Hippocampus | 12 | <i>METTL1</i>        | 58164318 | rs12300191 | 0.9956 | 57273289 | A | G | 0.36 | 3.59E-03 | 8.61E-03 | 1.34E-01 |
| rs4526799 | Brain_Hippocampus | 12 | <i>RAB5B</i>         | 56378093 | rs4514464  | 0.9956 | 57276375 | C | T | 0.36 | 2.92E-03 | 2.48E-02 | 1.53E-01 |
| rs4526799 | Brain_Hippocampus | 12 | <i>RNF41</i>         | 56607001 | rs4514464  | 0.9956 | 57276375 | C | T | 0.36 | 2.92E-03 | 2.32E-02 | 1.51E-01 |

|           |                   |    |         |          |            |        |          |   |   |      |          |          |          |
|-----------|-------------------|----|---------|----------|------------|--------|----------|---|---|------|----------|----------|----------|
| rs4526799 | Brain_Hippocampus | 12 | ANKRD52 | 56641903 | rs4514464  | 0.9956 | 57276375 | C | T | 0.36 | 2.92E-03 | 3.06E-02 | 1.60E-01 |
| rs4526799 | Brain_Hippocampus | 12 | ZBTB39  | 57396424 | rs4514464  | 0.9956 | 57276375 | C | T | 0.36 | 2.92E-03 | 4.04E-02 | 1.70E-01 |
| rs4526799 | Brain_Hippocampus | 12 | METTL1  | 58164318 | rs4514464  | 0.9956 | 57276375 | C | T | 0.36 | 2.92E-03 | 8.61E-03 | 1.30E-01 |
| rs4526799 | Brain_Hippocampus | 12 | RAB5B   | 56378093 | rs4417325  | 0.9956 | 57277302 | G | A | 0.36 | 3.59E-03 | 2.48E-02 | 1.57E-01 |
| rs4526799 | Brain_Hippocampus | 12 | RNF41   | 56607001 | rs4417325  | 0.9956 | 57277302 | G | A | 0.36 | 3.59E-03 | 2.32E-02 | 1.55E-01 |
| rs4526799 | Brain_Hippocampus | 12 | ANKRD52 | 56641903 | rs4417325  | 0.9956 | 57277302 | G | A | 0.36 | 3.59E-03 | 3.06E-02 | 1.63E-01 |
| rs4526799 | Brain_Hippocampus | 12 | ZBTB39  | 57396424 | rs4417325  | 0.9956 | 57277302 | G | A | 0.36 | 3.59E-03 | 4.04E-02 | 1.73E-01 |
| rs4526799 | Brain_Hippocampus | 12 | METTL1  | 58164318 | rs4417325  | 0.9956 | 57277302 | G | A | 0.36 | 3.59E-03 | 8.61E-03 | 1.34E-01 |
| rs4526799 | Brain_Hippocampus | 12 | RAB5B   | 56378093 | rs11172030 | 0.9956 | 57278076 | A | C | 0.36 | 3.63E-03 | 2.48E-02 | 1.57E-01 |
| rs4526799 | Brain_Hippocampus | 12 | RNF41   | 56607001 | rs11172030 | 0.9956 | 57278076 | A | C | 0.36 | 3.63E-03 | 2.32E-02 | 1.55E-01 |
| rs4526799 | Brain_Hippocampus | 12 | ANKRD52 | 56641903 | rs11172030 | 0.9956 | 57278076 | A | C | 0.36 | 3.63E-03 | 3.06E-02 | 1.63E-01 |
| rs4526799 | Brain_Hippocampus | 12 | ZBTB39  | 57396424 | rs11172030 | 0.9956 | 57278076 | A | C | 0.36 | 3.63E-03 | 4.04E-02 | 1.73E-01 |
| rs4526799 | Brain_Hippocampus | 12 | METTL1  | 58164318 | rs11172030 | 0.9956 | 57278076 | A | C | 0.36 | 3.63E-03 | 8.61E-03 | 1.34E-01 |
| rs4526799 | Brain_Hippocampus | 12 | RAB5B   | 56378093 | rs10876944 | 0.9956 | 57279372 | T | A | 0.36 | 3.63E-03 | 2.48E-02 | 1.57E-01 |
| rs4526799 | Brain_Hippocampus | 12 | RNF41   | 56607001 | rs10876944 | 0.9956 | 57279372 | T | A | 0.36 | 3.63E-03 | 2.32E-02 | 1.55E-01 |
| rs4526799 | Brain_Hippocampus | 12 | ANKRD52 | 56641903 | rs10876944 | 0.9956 | 57279372 | T | A | 0.36 | 3.63E-03 | 3.06E-02 | 1.63E-01 |
| rs4526799 | Brain_Hippocampus | 12 | ZBTB39  | 57396424 | rs10876944 | 0.9956 | 57279372 | T | A | 0.36 | 3.63E-03 | 4.04E-02 | 1.73E-01 |
| rs4526799 | Brain_Hippocampus | 12 | METTL1  | 58164318 | rs10876944 | 0.9956 | 57279372 | T | A | 0.36 | 3.63E-03 | 8.61E-03 | 1.34E-01 |
| rs4526799 | Brain_Hippocampus | 12 | RAB5B   | 56378093 | rs4326839  | 0.9956 | 57280374 | G | C | 0.36 | 3.58E-03 | 2.48E-02 | 1.56E-01 |
| rs4526799 | Brain_Hippocampus | 12 | RNF41   | 56607001 | rs4326839  | 0.9956 | 57280374 | G | C | 0.36 | 3.58E-03 | 2.32E-02 | 1.54E-01 |
| rs4526799 | Brain_Hippocampus | 12 | ANKRD52 | 56641903 | rs4326839  | 0.9956 | 57280374 | G | C | 0.36 | 3.58E-03 | 3.06E-02 | 1.63E-01 |
| rs4526799 | Brain_Hippocampus | 12 | ZBTB39  | 57396424 | rs4326839  | 0.9956 | 57280374 | G | C | 0.36 | 3.58E-03 | 4.04E-02 | 1.72E-01 |
| rs4526799 | Brain_Hippocampus | 12 | METTL1  | 58164318 | rs4326839  | 0.9956 | 57280374 | G | C | 0.36 | 3.58E-03 | 8.61E-03 | 1.33E-01 |
| rs4526799 | Brain_Hippocampus | 12 | RAB5B   | 56378093 | rs4526799  | 1.0000 | 57280586 | T | C | 0.34 | 7.26E-06 | 2.48E-02 | 5.78E-02 |
| rs4526799 | Brain_Hippocampus | 12 | RNF41   | 56607001 | rs4526799  | 1.0000 | 57280586 | T | C | 0.34 | 7.26E-06 | 2.32E-02 | 5.58E-02 |
| rs4526799 | Brain_Hippocampus | 12 | ANKRD52 | 56641903 | rs4526799  | 1.0000 | 57280586 | T | C | 0.34 | 7.26E-06 | 3.06E-02 | 6.47E-02 |
| rs4526799 | Brain_Hippocampus | 12 | ZBTB39  | 57396424 | rs4526799  | 1.0000 | 57280586 | T | C | 0.34 | 7.26E-06 | 4.04E-02 | 7.58E-02 |
| rs4526799 | Brain_Hippocampus | 12 | METTL1  | 58164318 | rs4526799  | 1.0000 | 57280586 | T | C | 0.34 | 7.26E-06 | 8.61E-03 | 3.47E-02 |
| rs4526799 | Brain_Hippocampus | 12 | RAB5B   | 56378093 | rs28876529 | 0.9956 | 57285301 | T | A | 0.36 | 2.25E-03 | 2.48E-02 | 1.41E-01 |
| rs4526799 | Brain_Hippocampus | 12 | RNF41   | 56607001 | rs28876529 | 0.9956 | 57285301 | T | A | 0.36 | 2.25E-03 | 2.32E-02 | 1.39E-01 |
| rs4526799 | Brain_Hippocampus | 12 | ANKRD52 | 56641903 | rs28876529 | 0.9956 | 57285301 | T | A | 0.36 | 2.25E-03 | 3.06E-02 | 1.48E-01 |
| rs4526799 | Brain_Hippocampus | 12 | ZBTB39  | 57396424 | rs28876529 | 0.9956 | 57285301 | T | A | 0.36 | 2.25E-03 | 4.04E-02 | 1.58E-01 |
| rs4526799 | Brain_Hippocampus | 12 | METTL1  | 58164318 | rs28876529 | 0.9956 | 57285301 | T | A | 0.36 | 2.25E-03 | 8.61E-03 | 1.17E-01 |
| rs4526799 | Brain_Hippocampus | 12 | RAB5B   | 56378093 | rs11172037 | 0.9956 | 57285427 | T | A | 0.36 | 2.25E-03 | 2.48E-02 | 1.41E-01 |
| rs4526799 | Brain_Hippocampus | 12 | RNF41   | 56607001 | rs11172037 | 0.9956 | 57285427 | T | A | 0.36 | 2.25E-03 | 2.32E-02 | 1.39E-01 |
| rs4526799 | Brain_Hippocampus | 12 | ANKRD52 | 56641903 | rs11172037 | 0.9956 | 57285427 | T | A | 0.36 | 2.25E-03 | 3.06E-02 | 1.48E-01 |
| rs4526799 | Brain_Hippocampus | 12 | ZBTB39  | 57396424 | rs11172037 | 0.9956 | 57285427 | T | A | 0.36 | 2.25E-03 | 4.04E-02 | 1.58E-01 |
| rs4526799 | Brain_Hippocampus | 12 | METTL1  | 58164318 | rs11172037 | 0.9956 | 57285427 | T | A | 0.36 | 2.25E-03 | 8.61E-03 | 1.17E-01 |
| rs4526799 | Brain_Hippocampus | 12 | RAB5B   | 56378093 | rs12321987 | 0.9956 | 57288449 | G | A | 0.36 | 4.47E-03 | 2.48E-02 | 1.78E-01 |
| rs4526799 | Brain_Hippocampus | 12 | RNF41   | 56607001 | rs12321987 | 0.9956 | 57288449 | G | A | 0.36 | 4.47E-03 | 2.32E-02 | 1.76E-01 |

|           |                   |    |         |          |            |        |          |   |   |      |          |          |          |
|-----------|-------------------|----|---------|----------|------------|--------|----------|---|---|------|----------|----------|----------|
| rs4526799 | Brain_Hippocampus | 12 | ANKRD52 | 56641903 | rs12321987 | 0.9956 | 57288449 | G | A | 0.36 | 4.47E-03 | 3.06E-02 | 1.84E-01 |
| rs4526799 | Brain_Hippocampus | 12 | ZBTB39  | 57396424 | rs12321987 | 0.9956 | 57288449 | G | A | 0.36 | 4.47E-03 | 4.04E-02 | 1.93E-01 |
| rs4526799 | Brain_Hippocampus | 12 | METTL1  | 58164318 | rs12321987 | 0.9956 | 57288449 | G | A | 0.36 | 4.47E-03 | 8.61E-03 | 1.56E-01 |
| rs4526799 | Brain_Hippocampus | 12 | RNF41   | 56607001 | rs11172043 | 0.9869 | 57293182 | G | A | 0.35 | 4.58E-03 | 3.36E-02 | 1.86E-01 |
| rs4526799 | Brain_Hippocampus | 12 | METTL1  | 58164318 | rs11172043 | 0.9869 | 57293182 | G | A | 0.35 | 4.58E-03 | 2.59E-03 | 1.40E-01 |
| rs4526799 | Brain_Hippocampus | 12 | RNF41   | 56607001 | rs12426816 | 0.9869 | 57294074 | A | C | 0.35 | 4.50E-03 | 3.36E-02 | 1.85E-01 |
| rs4526799 | Brain_Hippocampus | 12 | METTL1  | 58164318 | rs12426816 | 0.9869 | 57294074 | A | C | 0.35 | 4.50E-03 | 2.59E-03 | 1.40E-01 |
| rs4526799 | Brain_Hippocampus | 12 | RNF41   | 56607001 | rs11172047 | 0.9869 | 57298080 | T | C | 0.35 | 6.51E-03 | 3.36E-02 | 1.99E-01 |
| rs4526799 | Brain_Hippocampus | 12 | METTL1  | 58164318 | rs11172047 | 0.9869 | 57298080 | T | C | 0.35 | 6.51E-03 | 2.59E-03 | 1.55E-01 |
| rs4526799 | Brain_Hippocampus | 12 | RNF41   | 56607001 | rs2371631  | 0.9869 | 57298614 | T | A | 0.35 | 6.32E-03 | 3.36E-02 | 1.96E-01 |
| rs4526799 | Brain_Hippocampus | 12 | METTL1  | 58164318 | rs2371631  | 0.9869 | 57298614 | T | A | 0.35 | 6.32E-03 | 2.59E-03 | 1.52E-01 |
| rs4526799 | Brain_Hippocampus | 12 | RNF41   | 56607001 | rs12305763 | 0.9869 | 57299263 | G | A | 0.35 | 6.82E-03 | 3.36E-02 | 2.00E-01 |
| rs4526799 | Brain_Hippocampus | 12 | METTL1  | 58164318 | rs12305763 | 0.9869 | 57299263 | G | A | 0.35 | 6.82E-03 | 2.59E-03 | 1.57E-01 |
| rs4526799 | Brain_Hippocampus | 12 | RPL41   | 56511048 | rs11172049 | 0.9128 | 57304203 | T | C | 0.35 | 1.15E-02 | 3.78E-02 | 2.04E-01 |
| rs4526799 | Brain_Hippocampus | 12 | RNF41   | 56607001 | rs11172049 | 0.9128 | 57304203 | T | C | 0.35 | 1.15E-02 | 4.35E-02 | 2.09E-01 |
| rs4526799 | Brain_Hippocampus | 12 | ANKRD52 | 56641903 | rs11172049 | 0.9128 | 57304203 | T | C | 0.35 | 1.15E-02 | 3.82E-02 | 2.05E-01 |
| rs4526799 | Brain_Hippocampus | 12 | SPRYD4  | 56863518 | rs11172049 | 0.9128 | 57304203 | T | C | 0.35 | 1.15E-02 | 4.57E-02 | 2.11E-01 |
| rs4526799 | Brain_Hippocampus | 12 | METTL1  | 58164318 | rs11172049 | 0.9128 | 57304203 | T | C | 0.35 | 1.15E-02 | 7.23E-03 | 1.69E-01 |
| rs4526799 | Brain_Hippocampus | 12 | CTDSP2  | 58227116 | rs11172049 | 0.9128 | 57304203 | T | C | 0.35 | 1.15E-02 | 2.59E-02 | 1.93E-01 |
| rs4526799 | Brain_Hippocampus | 12 | RPL41   | 56511048 | rs1874888  | 0.9085 | 57305138 | A | C | 0.35 | 1.15E-02 | 3.78E-02 | 2.04E-01 |
| rs4526799 | Brain_Hippocampus | 12 | RNF41   | 56607001 | rs1874888  | 0.9085 | 57305138 | A | C | 0.35 | 1.15E-02 | 4.35E-02 | 2.09E-01 |
| rs4526799 | Brain_Hippocampus | 12 | ANKRD52 | 56641903 | rs1874888  | 0.9085 | 57305138 | A | C | 0.35 | 1.15E-02 | 3.82E-02 | 2.05E-01 |
| rs4526799 | Brain_Hippocampus | 12 | SPRYD4  | 56863518 | rs1874888  | 0.9085 | 57305138 | A | C | 0.35 | 1.15E-02 | 4.57E-02 | 2.11E-01 |
| rs4526799 | Brain_Hippocampus | 12 | METTL1  | 58164318 | rs1874888  | 0.9085 | 57305138 | A | C | 0.35 | 1.15E-02 | 7.23E-03 | 1.69E-01 |
| rs4526799 | Brain_Hippocampus | 12 | CTDSP2  | 58227116 | rs1874888  | 0.9085 | 57305138 | A | C | 0.35 | 1.15E-02 | 2.59E-02 | 1.93E-01 |
| rs4526799 | Brain_Hippocampus | 12 | RAB5B   | 56378093 | rs10506349 | 0.9128 | 57306412 | T | C | 0.37 | 1.10E-02 | 2.06E-02 | 1.78E-01 |
| rs4526799 | Brain_Hippocampus | 12 | RPL41   | 56511048 | rs10506349 | 0.9128 | 57306412 | T | C | 0.37 | 1.10E-02 | 6.03E-03 | 1.56E-01 |
| rs4526799 | Brain_Hippocampus | 12 | ANKRD52 | 56641903 | rs10506349 | 0.9128 | 57306412 | T | C | 0.37 | 1.10E-02 | 1.59E-02 | 1.72E-01 |
| rs4526799 | Brain_Hippocampus | 12 | ZBTB39  | 57396424 | rs10506349 | 0.9128 | 57306412 | T | C | 0.37 | 1.10E-02 | 3.31E-02 | 1.91E-01 |
| rs4526799 | Brain_Hippocampus | 12 | MYO1A   | 57433641 | rs10506349 | 0.9128 | 57306412 | T | C | 0.37 | 1.10E-02 | 4.00E-02 | 1.97E-01 |
| rs4526799 | Brain_Hippocampus | 12 | PIP4K2C | 57991077 | rs10506349 | 0.9128 | 57306412 | T | C | 0.37 | 1.10E-02 | 1.63E-02 | 1.73E-01 |
| rs4526799 | Brain_Hippocampus | 12 | METTL1  | 58164318 | rs10506349 | 0.9128 | 57306412 | T | C | 0.37 | 1.10E-02 | 1.46E-02 | 1.71E-01 |
| rs4526799 | Brain_Hippocampus | 12 | RPL41   | 56511048 | rs10876951 | 0.9085 | 57306430 | T | G | 0.35 | 1.15E-02 | 3.78E-02 | 2.04E-01 |
| rs4526799 | Brain_Hippocampus | 12 | RNF41   | 56607001 | rs10876951 | 0.9085 | 57306430 | T | G | 0.35 | 1.15E-02 | 4.35E-02 | 2.09E-01 |
| rs4526799 | Brain_Hippocampus | 12 | ANKRD52 | 56641903 | rs10876951 | 0.9085 | 57306430 | T | G | 0.35 | 1.15E-02 | 3.82E-02 | 2.05E-01 |
| rs4526799 | Brain_Hippocampus | 12 | SPRYD4  | 56863518 | rs10876951 | 0.9085 | 57306430 | T | G | 0.35 | 1.15E-02 | 4.57E-02 | 2.11E-01 |
| rs4526799 | Brain_Hippocampus | 12 | METTL1  | 58164318 | rs10876951 | 0.9085 | 57306430 | T | G | 0.35 | 1.15E-02 | 7.23E-03 | 1.69E-01 |
| rs4526799 | Brain_Hippocampus | 12 | CTDSP2  | 58227116 | rs10876951 | 0.9085 | 57306430 | T | G | 0.35 | 1.15E-02 | 2.59E-02 | 1.93E-01 |
| rs4526799 | Brain_Hippocampus | 12 | RAB5B   | 56378093 | rs10747774 | 0.9128 | 57307079 | T | C | 0.36 | 1.16E-02 | 2.06E-02 | 1.83E-01 |
| rs4526799 | Brain_Hippocampus | 12 | RPL41   | 56511048 | rs10747774 | 0.9128 | 57307079 | T | C | 0.36 | 1.16E-02 | 5.70E-03 | 1.61E-01 |



|           |                   |    |         |          |            |        |          |   |   |      |          |          |          |
|-----------|-------------------|----|---------|----------|------------|--------|----------|---|---|------|----------|----------|----------|
| rs4526799 | Brain_Hippocampus | 12 | ANKRD52 | 56641903 | rs10747774 | 0.9128 | 57307079 | T | C | 0.36 | 1.16E-02 | 1.53E-02 | 1.77E-01 |
| rs4526799 | Brain_Hippocampus | 12 | ZBTB39  | 57396424 | rs10747774 | 0.9128 | 57307079 | T | C | 0.36 | 1.16E-02 | 3.08E-02 | 1.94E-01 |
| rs4526799 | Brain_Hippocampus | 12 | MYO1A   | 57433641 | rs10747774 | 0.9128 | 57307079 | T | C | 0.36 | 1.16E-02 | 3.44E-02 | 1.97E-01 |
| rs4526799 | Brain_Hippocampus | 12 | PIP4K2C | 57991077 | rs10747774 | 0.9128 | 57307079 | T | C | 0.36 | 1.16E-02 | 1.52E-02 | 1.77E-01 |
| rs4526799 | Brain_Hippocampus | 12 | METTL1  | 58164318 | rs10747774 | 0.9128 | 57307079 | T | C | 0.36 | 1.16E-02 | 1.57E-02 | 1.77E-01 |
| rs4526799 | Brain_Hippocampus | 12 | RPL41   | 56511048 | rs10783812 | 0.9085 | 57308723 | C | T | 0.35 | 1.19E-02 | 3.78E-02 | 2.07E-01 |
| rs4526799 | Brain_Hippocampus | 12 | RNF41   | 56607001 | rs10783812 | 0.9085 | 57308723 | C | T | 0.35 | 1.19E-02 | 4.35E-02 | 2.12E-01 |
| rs4526799 | Brain_Hippocampus | 12 | ANKRD52 | 56641903 | rs10783812 | 0.9085 | 57308723 | C | T | 0.35 | 1.19E-02 | 3.82E-02 | 2.08E-01 |
| rs4526799 | Brain_Hippocampus | 12 | SPRYD4  | 56863518 | rs10783812 | 0.9085 | 57308723 | C | T | 0.35 | 1.19E-02 | 4.57E-02 | 2.14E-01 |
| rs4526799 | Brain_Hippocampus | 12 | METTL1  | 58164318 | rs10783812 | 0.9085 | 57308723 | C | T | 0.35 | 1.19E-02 | 7.23E-03 | 1.72E-01 |
| rs4526799 | Brain_Hippocampus | 12 | CTDSP2  | 58227116 | rs10783812 | 0.9085 | 57308723 | C | T | 0.35 | 1.19E-02 | 2.59E-02 | 1.96E-01 |
| rs4526799 | Brain_Hippocampus | 12 | RAB5B   | 56378093 | rs11172056 | 0.9089 | 57308975 | C | T | 0.37 | 1.10E-02 | 2.06E-02 | 1.78E-01 |
| rs4526799 | Brain_Hippocampus | 12 | RPL41   | 56511048 | rs11172056 | 0.9089 | 57308975 | C | T | 0.37 | 1.10E-02 | 5.70E-03 | 1.56E-01 |
| rs4526799 | Brain_Hippocampus | 12 | ANKRD52 | 56641903 | rs11172056 | 0.9089 | 57308975 | C | T | 0.37 | 1.10E-02 | 1.53E-02 | 1.72E-01 |
| rs4526799 | Brain_Hippocampus | 12 | ZBTB39  | 57396424 | rs11172056 | 0.9089 | 57308975 | C | T | 0.37 | 1.10E-02 | 3.08E-02 | 1.89E-01 |
| rs4526799 | Brain_Hippocampus | 12 | MYO1A   | 57433641 | rs11172056 | 0.9089 | 57308975 | C | T | 0.37 | 1.10E-02 | 3.44E-02 | 1.93E-01 |
| rs4526799 | Brain_Hippocampus | 12 | PIP4K2C | 57991077 | rs11172056 | 0.9089 | 57308975 | C | T | 0.37 | 1.10E-02 | 1.52E-02 | 1.72E-01 |
| rs4526799 | Brain_Hippocampus | 12 | METTL1  | 58164318 | rs11172056 | 0.9089 | 57308975 | C | T | 0.37 | 1.10E-02 | 1.57E-02 | 1.72E-01 |
| rs4526799 | Brain_Hippocampus | 12 | RAB5B   | 56378093 | rs7302420  | 0.9085 | 57309884 | G | C | 0.36 | 1.54E-02 | 3.96E-02 | 2.24E-01 |
| rs4526799 | Brain_Hippocampus | 12 | RPL41   | 56511048 | rs7302420  | 0.9085 | 57309884 | G | C | 0.36 | 1.54E-02 | 1.57E-02 | 2.01E-01 |
| rs4526799 | Brain_Hippocampus | 12 | RNF41   | 56607001 | rs7302420  | 0.9085 | 57309884 | G | C | 0.36 | 1.54E-02 | 3.78E-02 | 2.23E-01 |
| rs4526799 | Brain_Hippocampus | 12 | ANKRD52 | 56641903 | rs7302420  | 0.9085 | 57309884 | G | C | 0.36 | 1.54E-02 | 1.71E-02 | 2.03E-01 |
| rs4526799 | Brain_Hippocampus | 12 | GLS2    | 56873481 | rs7302420  | 0.9085 | 57309884 | G | C | 0.36 | 1.54E-02 | 2.83E-02 | 2.14E-01 |
| rs4526799 | Brain_Hippocampus | 12 | MYO1A   | 57433641 | rs7302420  | 0.9085 | 57309884 | G | C | 0.36 | 1.54E-02 | 3.08E-02 | 2.17E-01 |
| rs4526799 | Brain_Hippocampus | 12 | PIP4K2C | 57991077 | rs7302420  | 0.9085 | 57309884 | G | C | 0.36 | 1.54E-02 | 3.88E-02 | 2.23E-01 |
| rs4526799 | Brain_Hippocampus | 12 | METTL1  | 58164318 | rs7302420  | 0.9085 | 57309884 | G | C | 0.36 | 1.54E-02 | 1.14E-02 | 1.96E-01 |
| rs4526799 | Brain_Hippocampus | 12 | CTDSP2  | 58227116 | rs7302420  | 0.9085 | 57309884 | G | C | 0.36 | 1.54E-02 | 3.52E-02 | 2.20E-01 |
| rs4526799 | Brain_Hippocampus | 12 | RAB5B   | 56378093 | rs12228618 | 0.9128 | 57311229 | T | C | 0.37 | 1.29E-02 | 3.02E-02 | 1.97E-01 |
| rs4526799 | Brain_Hippocampus | 12 | RPL41   | 56511048 | rs12228618 | 0.9128 | 57311229 | T | C | 0.37 | 1.29E-02 | 2.31E-02 | 1.90E-01 |
| rs4526799 | Brain_Hippocampus | 12 | RNF41   | 56607001 | rs12228618 | 0.9128 | 57311229 | T | C | 0.37 | 1.29E-02 | 4.50E-02 | 2.10E-01 |
| rs4526799 | Brain_Hippocampus | 12 | ANKRD52 | 56641903 | rs12228618 | 0.9128 | 57311229 | T | C | 0.37 | 1.29E-02 | 1.70E-02 | 1.83E-01 |
| rs4526799 | Brain_Hippocampus | 12 | ZBTB39  | 57396424 | rs12228618 | 0.9128 | 57311229 | T | C | 0.37 | 1.29E-02 | 1.74E-02 | 1.83E-01 |
| rs4526799 | Brain_Hippocampus | 12 | MYO1A   | 57433641 | rs12228618 | 0.9128 | 57311229 | T | C | 0.37 | 1.29E-02 | 2.09E-02 | 1.87E-01 |
| rs4526799 | Brain_Hippocampus | 12 | PIP4K2C | 57991077 | rs12228618 | 0.9128 | 57311229 | T | C | 0.37 | 1.29E-02 | 1.63E-02 | 1.82E-01 |
| rs4526799 | Brain_Hippocampus | 12 | RAB5B   | 56378093 | rs9739473  | 0.9012 | 57313335 | A | T | 0.37 | 2.65E-02 | 1.73E-02 | 2.53E-01 |
| rs4526799 | Brain_Hippocampus | 12 | RPL41   | 56511048 | rs9739473  | 0.9012 | 57313335 | A | T | 0.37 | 2.65E-02 | 4.04E-03 | 2.35E-01 |
| rs4526799 | Brain_Hippocampus | 12 | ANKRD52 | 56641903 | rs9739473  | 0.9012 | 57313335 | A | T | 0.37 | 2.65E-02 | 1.02E-02 | 2.45E-01 |
| rs4526799 | Brain_Hippocampus | 12 | RBMS2   | 56950229 | rs9739473  | 0.9012 | 57313335 | A | T | 0.37 | 2.65E-02 | 3.89E-02 | 2.70E-01 |
| rs4526799 | Brain_Hippocampus | 12 | ZBTB39  | 57396424 | rs9739473  | 0.9012 | 57313335 | A | T | 0.37 | 2.65E-02 | 1.24E-02 | 2.48E-01 |
| rs4526799 | Brain_Hippocampus | 12 | MYO1A   | 57433641 | rs9739473  | 0.9012 | 57313335 | A | T | 0.37 | 2.65E-02 | 2.51E-02 | 2.60E-01 |

|           |                    |    |                |          |            |        |          |   |   |      |          |          |          |
|-----------|--------------------|----|----------------|----------|------------|--------|----------|---|---|------|----------|----------|----------|
| rs4526799 | Brain_Hippocampus  | 12 | PIP4K2C        | 57991077 | rs9739473  | 0.9012 | 57313335 | A | T | 0.37 | 2.65E-02 | 1.33E-02 | 2.49E-01 |
| rs4526799 | Brain_Hippocampus  | 12 | METTL1         | 58164318 | rs9739473  | 0.9012 | 57313335 | A | T | 0.37 | 2.65E-02 | 4.68E-02 | 2.76E-01 |
| rs4526799 | Brain_Hypothalamus | 12 | RP11-977G19.11 | 56701259 | rs9919772  | 0.8450 | 57260027 | T | C | 0.33 | 1.03E-02 | 1.01E-02 | 1.97E-01 |
| rs4526799 | Brain_Hypothalamus | 12 | IL23A          | 56733428 | rs9919772  | 0.8450 | 57260027 | T | C | 0.33 | 1.03E-02 | 1.42E-02 | 2.03E-01 |
| rs4526799 | Brain_Hypothalamus | 12 | STAT2          | 56744645 | rs9919772  | 0.8450 | 57260027 | T | C | 0.33 | 1.03E-02 | 4.76E-02 | 2.34E-01 |
| rs4526799 | Brain_Hypothalamus | 12 | PTGES3         | 57069643 | rs9919772  | 0.8450 | 57260027 | T | C | 0.33 | 1.03E-02 | 1.18E-02 | 2.00E-01 |
| rs4526799 | Brain_Hypothalamus | 12 | SLC26A10       | 58016493 | rs9919772  | 0.8450 | 57260027 | T | C | 0.33 | 1.03E-02 | 2.90E-02 | 2.19E-01 |
| rs4526799 | Brain_Hypothalamus | 12 | RP11-977G19.11 | 56701259 | rs4495925  | 0.8650 | 57268116 | C | G | 0.33 | 1.04E-02 | 1.26E-02 | 1.98E-01 |
| rs4526799 | Brain_Hypothalamus | 12 | IL23A          | 56733428 | rs4495925  | 0.8650 | 57268116 | C | G | 0.33 | 1.04E-02 | 1.37E-02 | 1.99E-01 |
| rs4526799 | Brain_Hypothalamus | 12 | STAT2          | 56744645 | rs4495925  | 0.8650 | 57268116 | C | G | 0.33 | 1.04E-02 | 4.19E-02 | 2.27E-01 |
| rs4526799 | Brain_Hypothalamus | 12 | PTGES3         | 57069643 | rs4495925  | 0.8650 | 57268116 | C | G | 0.33 | 1.04E-02 | 2.39E-02 | 2.11E-01 |
| rs4526799 | Brain_Hypothalamus | 12 | SLC26A10       | 58016493 | rs4495925  | 0.8650 | 57268116 | C | G | 0.33 | 1.04E-02 | 4.09E-02 | 2.26E-01 |
| rs4526799 | Brain_Hypothalamus | 12 | RP11-977G19.11 | 56701259 | rs4471472  | 0.8650 | 57268985 | A | G | 0.32 | 9.99E-03 | 1.26E-02 | 1.94E-01 |
| rs4526799 | Brain_Hypothalamus | 12 | IL23A          | 56733428 | rs4471472  | 0.8650 | 57268985 | A | G | 0.32 | 9.99E-03 | 1.37E-02 | 1.95E-01 |
| rs4526799 | Brain_Hypothalamus | 12 | STAT2          | 56744645 | rs4471472  | 0.8650 | 57268985 | A | G | 0.32 | 9.99E-03 | 4.19E-02 | 2.23E-01 |
| rs4526799 | Brain_Hypothalamus | 12 | PTGES3         | 57069643 | rs4471472  | 0.8650 | 57268985 | A | G | 0.32 | 9.99E-03 | 2.39E-02 | 2.07E-01 |
| rs4526799 | Brain_Hypothalamus | 12 | SLC26A10       | 58016493 | rs4471472  | 0.8650 | 57268985 | A | G | 0.32 | 9.99E-03 | 4.09E-02 | 2.22E-01 |
| rs4526799 | Brain_Hypothalamus | 12 | RP11-977G19.11 | 56701259 | rs4633499  | 0.8610 | 57269264 | A | T | 0.32 | 1.43E-02 | 8.30E-03 | 2.25E-01 |
| rs4526799 | Brain_Hypothalamus | 12 | IL23A          | 56733428 | rs4633499  | 0.8610 | 57269264 | A | T | 0.32 | 1.43E-02 | 1.68E-02 | 2.35E-01 |
| rs4526799 | Brain_Hypothalamus | 12 | STAT2          | 56744645 | rs4633499  | 0.8610 | 57269264 | A | T | 0.32 | 1.43E-02 | 3.77E-02 | 2.53E-01 |
| rs4526799 | Brain_Hypothalamus | 12 | PTGES3         | 57069643 | rs4633499  | 0.8610 | 57269264 | A | T | 0.32 | 1.43E-02 | 3.59E-02 | 2.52E-01 |
| rs4526799 | Brain_Hypothalamus | 12 | SLC26A10       | 58016493 | rs4633499  | 0.8610 | 57269264 | A | T | 0.32 | 1.43E-02 | 4.45E-02 | 2.58E-01 |
| rs4526799 | Brain_Hypothalamus | 12 | PTGES3         | 57069643 | rs12300079 | 0.9956 | 57273194 | T | C | 0.36 | 3.73E-03 | 1.09E-02 | 1.40E-01 |
| rs4526799 | Brain_Hypothalamus | 12 | PTGES3         | 57069643 | rs12300191 | 0.9956 | 57273289 | A | G | 0.36 | 3.59E-03 | 1.05E-02 | 1.37E-01 |
| rs4526799 | Brain_Hypothalamus | 12 | PTGES3         | 57069643 | rs4514464  | 0.9956 | 57276375 | C | T | 0.36 | 2.92E-03 | 1.05E-02 | 1.34E-01 |
| rs4526799 | Brain_Hypothalamus | 12 | PTGES3         | 57069643 | rs4417325  | 0.9956 | 57277302 | G | A | 0.36 | 3.59E-03 | 1.05E-02 | 1.37E-01 |
| rs4526799 | Brain_Hypothalamus | 12 | PTGES3         | 57069643 | rs11172030 | 0.9956 | 57278076 | A | C | 0.36 | 3.63E-03 | 1.05E-02 | 1.38E-01 |
| rs4526799 | Brain_Hypothalamus | 12 | PTGES3         | 57069643 | rs10876944 | 0.9956 | 57279372 | T | A | 0.36 | 3.63E-03 | 1.05E-02 | 1.38E-01 |
| rs4526799 | Brain_Hypothalamus | 12 | PTGES3         | 57069643 | rs4326839  | 0.9956 | 57280374 | G | C | 0.36 | 3.58E-03 | 1.05E-02 | 1.37E-01 |
| rs4526799 | Brain_Hypothalamus | 12 | PTGES3         | 57069643 | rs4526799  | 1.0000 | 57280586 | T | C | 0.34 | 7.26E-06 | 1.05E-02 | 3.79E-02 |
| rs4526799 | Brain_Hypothalamus | 12 | PTGES3         | 57069643 | rs28876529 | 0.9956 | 57285301 | T | A | 0.36 | 2.25E-03 | 1.05E-02 | 1.21E-01 |
| rs4526799 | Brain_Hypothalamus | 12 | PTGES3         | 57069643 | rs11172037 | 0.9956 | 57285427 | T | A | 0.36 | 2.25E-03 | 1.05E-02 | 1.21E-01 |
| rs4526799 | Brain_Hypothalamus | 12 | PTGES3         | 57069643 | rs12321987 | 0.9956 | 57288449 | G | A | 0.36 | 4.47E-03 | 1.05E-02 | 1.60E-01 |
| rs4526799 | Brain_Hypothalamus | 12 | PTGES3         | 57069643 | rs11172043 | 0.9869 | 57293182 | G | A | 0.35 | 4.58E-03 | 1.19E-02 | 1.60E-01 |
| rs4526799 | Brain_Hypothalamus | 12 | RP11-545N8.3   | 57539902 | rs11172043 | 0.9869 | 57293182 | G | A | 0.35 | 4.58E-03 | 4.60E-02 | 1.97E-01 |
| rs4526799 | Brain_Hypothalamus | 12 | OS9            | 58101539 | rs11172043 | 0.9869 | 57293182 | G | A | 0.35 | 4.58E-03 | 1.04E-02 | 1.58E-01 |
| rs4526799 | Brain_Hypothalamus | 12 | PTGES3         | 57069643 | rs12426816 | 0.9869 | 57294074 | A | C | 0.35 | 4.50E-03 | 1.19E-02 | 1.60E-01 |
| rs4526799 | Brain_Hypothalamus | 12 | RP11-545N8.3   | 57539902 | rs12426816 | 0.9869 | 57294074 | A | C | 0.35 | 4.50E-03 | 4.60E-02 | 1.97E-01 |
| rs4526799 | Brain_Hypothalamus | 12 | OS9            | 58101539 | rs12426816 | 0.9869 | 57294074 | A | C | 0.35 | 4.50E-03 | 1.04E-02 | 1.58E-01 |
| rs4526799 | Brain_Hypothalamus | 12 | PTGES3         | 57069643 | rs11172047 | 0.9869 | 57298080 | T | C | 0.35 | 6.51E-03 | 1.19E-02 | 1.75E-01 |

|           |                                       |    |                       |          |            |        |          |   |   |      |          |          |          |
|-----------|---------------------------------------|----|-----------------------|----------|------------|--------|----------|---|---|------|----------|----------|----------|
| rs4526799 | Brain_Hypothalamus                    | 12 | <i>RP11-545N8.3</i>   | 57539902 | rs11172047 | 0.9869 | 57298080 | T | C | 0.35 | 6.51E-03 | 4.60E-02 | 2.10E-01 |
| rs4526799 | Brain_Hypothalamus                    | 12 | <i>OS9</i>            | 58101539 | rs11172047 | 0.9869 | 57298080 | T | C | 0.35 | 6.51E-03 | 1.04E-02 | 1.73E-01 |
| rs4526799 | Brain_Hypothalamus                    | 12 | <i>PTGES3</i>         | 57069643 | rs2371631  | 0.9869 | 57298614 | T | A | 0.35 | 6.32E-03 | 1.19E-02 | 1.72E-01 |
| rs4526799 | Brain_Hypothalamus                    | 12 | <i>RP11-545N8.3</i>   | 57539902 | rs2371631  | 0.9869 | 57298614 | T | A | 0.35 | 6.32E-03 | 4.60E-02 | 2.07E-01 |
| rs4526799 | Brain_Hypothalamus                    | 12 | <i>OS9</i>            | 58101539 | rs2371631  | 0.9869 | 57298614 | T | A | 0.35 | 6.32E-03 | 1.04E-02 | 1.69E-01 |
| rs4526799 | Brain_Hypothalamus                    | 12 | <i>PTGES3</i>         | 57069643 | rs12305763 | 0.9869 | 57299263 | G | A | 0.35 | 6.82E-03 | 1.19E-02 | 1.76E-01 |
| rs4526799 | Brain_Hypothalamus                    | 12 | <i>RP11-545N8.3</i>   | 57539902 | rs12305763 | 0.9869 | 57299263 | G | A | 0.35 | 6.82E-03 | 4.60E-02 | 2.11E-01 |
| rs4526799 | Brain_Hypothalamus                    | 12 | <i>OS9</i>            | 58101539 | rs12305763 | 0.9869 | 57299263 | G | A | 0.35 | 6.82E-03 | 1.04E-02 | 1.74E-01 |
| rs4526799 | Brain_Hypothalamus                    | 12 | <i>RP11-977G19.11</i> | 56701259 | rs11172049 | 0.9128 | 57304203 | T | C | 0.35 | 1.15E-02 | 2.25E-02 | 1.90E-01 |
| rs4526799 | Brain_Hypothalamus                    | 12 | <i>PTGES3</i>         | 57069643 | rs11172049 | 0.9128 | 57304203 | T | C | 0.35 | 1.15E-02 | 1.06E-02 | 1.74E-01 |
| rs4526799 | Brain_Hypothalamus                    | 12 | <i>OS9</i>            | 58101539 | rs11172049 | 0.9128 | 57304203 | T | C | 0.35 | 1.15E-02 | 2.77E-02 | 1.95E-01 |
| rs4526799 | Brain_Hypothalamus                    | 12 | <i>RP11-977G19.11</i> | 56701259 | rs1874888  | 0.9085 | 57305138 | A | C | 0.35 | 1.15E-02 | 2.25E-02 | 1.90E-01 |
| rs4526799 | Brain_Hypothalamus                    | 12 | <i>PTGES3</i>         | 57069643 | rs1874888  | 0.9085 | 57305138 | A | C | 0.35 | 1.15E-02 | 1.06E-02 | 1.74E-01 |
| rs4526799 | Brain_Hypothalamus                    | 12 | <i>OS9</i>            | 58101539 | rs1874888  | 0.9085 | 57305138 | A | C | 0.35 | 1.15E-02 | 2.77E-02 | 1.95E-01 |
| rs4526799 | Brain_Hypothalamus                    | 12 | <i>RP11-977G19.11</i> | 56701259 | rs10506349 | 0.9128 | 57306412 | T | C | 0.37 | 1.10E-02 | 3.67E-02 | 1.94E-01 |
| rs4526799 | Brain_Hypothalamus                    | 12 | <i>PTGES3</i>         | 57069643 | rs10506349 | 0.9128 | 57306412 | T | C | 0.37 | 1.10E-02 | 1.45E-02 | 1.71E-01 |
| rs4526799 | Brain_Hypothalamus                    | 12 | <i>RP11-545N8.3</i>   | 57539902 | rs10506349 | 0.9128 | 57306412 | T | C | 0.37 | 1.10E-02 | 4.65E-02 | 2.03E-01 |
| rs4526799 | Brain_Hypothalamus                    | 12 | <i>RP11-977G19.11</i> | 56701259 | rs10876951 | 0.9085 | 57306430 | T | G | 0.35 | 1.15E-02 | 2.25E-02 | 1.90E-01 |
| rs4526799 | Brain_Hypothalamus                    | 12 | <i>PTGES3</i>         | 57069643 | rs10876951 | 0.9085 | 57306430 | T | G | 0.35 | 1.15E-02 | 1.06E-02 | 1.74E-01 |
| rs4526799 | Brain_Hypothalamus                    | 12 | <i>OS9</i>            | 58101539 | rs10876951 | 0.9085 | 57306430 | T | G | 0.35 | 1.15E-02 | 2.77E-02 | 1.95E-01 |
| rs4526799 | Brain_Hypothalamus                    | 12 | <i>RP11-977G19.11</i> | 56701259 | rs10747774 | 0.9128 | 57307079 | T | C | 0.36 | 1.16E-02 | 3.67E-02 | 2.00E-01 |
| rs4526799 | Brain_Hypothalamus                    | 12 | <i>PTGES3</i>         | 57069643 | rs10747774 | 0.9128 | 57307079 | T | C | 0.36 | 1.16E-02 | 1.64E-02 | 1.78E-01 |
| rs4526799 | Brain_Hypothalamus                    | 12 | <i>RP11-545N8.3</i>   | 57539902 | rs10747774 | 0.9128 | 57307079 | T | C | 0.36 | 1.16E-02 | 4.35E-02 | 2.05E-01 |
| rs4526799 | Brain_Hypothalamus                    | 12 | <i>RP11-977G19.11</i> | 56701259 | rs10783812 | 0.9085 | 57308723 | C | T | 0.35 | 1.19E-02 | 2.25E-02 | 1.93E-01 |
| rs4526799 | Brain_Hypothalamus                    | 12 | <i>PTGES3</i>         | 57069643 | rs10783812 | 0.9085 | 57308723 | C | T | 0.35 | 1.19E-02 | 1.06E-02 | 1.78E-01 |
| rs4526799 | Brain_Hypothalamus                    | 12 | <i>OS9</i>            | 58101539 | rs10783812 | 0.9085 | 57308723 | C | T | 0.35 | 1.19E-02 | 2.77E-02 | 1.98E-01 |
| rs4526799 | Brain_Hypothalamus                    | 12 | <i>RP11-977G19.11</i> | 56701259 | rs11172056 | 0.9089 | 57308975 | C | T | 0.37 | 1.10E-02 | 3.67E-02 | 1.95E-01 |
| rs4526799 | Brain_Hypothalamus                    | 12 | <i>PTGES3</i>         | 57069643 | rs11172056 | 0.9089 | 57308975 | C | T | 0.37 | 1.10E-02 | 1.64E-02 | 1.73E-01 |
| rs4526799 | Brain_Hypothalamus                    | 12 | <i>RP11-545N8.3</i>   | 57539902 | rs11172056 | 0.9089 | 57308975 | C | T | 0.37 | 1.10E-02 | 4.35E-02 | 2.01E-01 |
| rs4526799 | Brain_Hypothalamus                    | 12 | <i>RP11-977G19.11</i> | 56701259 | rs7302420  | 0.9085 | 57309884 | G | C | 0.36 | 1.54E-02 | 3.69E-02 | 2.22E-01 |
| rs4526799 | Brain_Hypothalamus                    | 12 | <i>PTGES3</i>         | 57069643 | rs7302420  | 0.9085 | 57309884 | G | C | 0.36 | 1.54E-02 | 1.76E-02 | 2.03E-01 |
| rs4526799 | Brain_Hypothalamus                    | 12 | <i>RP11-977G19.11</i> | 56701259 | rs12228618 | 0.9128 | 57311229 | T | C | 0.37 | 1.29E-02 | 2.12E-02 | 1.88E-01 |
| rs4526799 | Brain_Hypothalamus                    | 12 | <i>PTGES3</i>         | 57069643 | rs12228618 | 0.9128 | 57311229 | T | C | 0.37 | 1.29E-02 | 2.91E-02 | 1.96E-01 |
| rs4526799 | Brain_Hypothalamus                    | 12 | <i>SLC26A10</i>       | 58016493 | rs12228618 | 0.9128 | 57311229 | T | C | 0.37 | 1.29E-02 | 2.26E-02 | 1.89E-01 |
| rs4526799 | Brain_Hypothalamus                    | 12 | <i>RP11-977G19.11</i> | 56701259 | rs9739473  | 0.9012 | 57313335 | A | T | 0.37 | 2.65E-02 | 2.28E-02 | 2.58E-01 |
| rs4526799 | Brain_Hypothalamus                    | 12 | <i>PTGES3</i>         | 57069643 | rs9739473  | 0.9012 | 57313335 | A | T | 0.37 | 2.65E-02 | 2.06E-02 | 2.56E-01 |
| rs4526799 | Brain_Hypothalamus                    | 12 | <i>SLC26A10</i>       | 58016493 | rs9739473  | 0.9012 | 57313335 | A | T | 0.37 | 2.65E-02 | 3.33E-02 | 2.66E-01 |
| rs4526799 | Brain_Nucleus_accumbens_basal_ganglia | 12 | <i>PMEL</i>           | 56357495 | rs9919772  | 0.8450 | 57260027 | T | C | 0.33 | 1.03E-02 | 3.72E-02 | 2.26E-01 |
| rs4526799 | Brain_Nucleus_accumbens_basal_ganglia | 12 | <i>RP11-603J24.5</i>  | 56518610 | rs9919772  | 0.8450 | 57260027 | T | C | 0.33 | 1.03E-02 | 1.45E-02 | 2.03E-01 |
| rs4526799 | Brain_Nucleus_accumbens_basal_ganglia | 12 | <i>RP11-977G19.5</i>  | 56570105 | rs9919772  | 0.8450 | 57260027 | T | C | 0.33 | 1.03E-02 | 3.90E-02 | 2.27E-01 |

|           |                                       |    |                      |          |            |        |          |   |   |      |          |          |          |
|-----------|---------------------------------------|----|----------------------|----------|------------|--------|----------|---|---|------|----------|----------|----------|
| rs4526799 | Brain_Nucleus_accumbens_basal_ganglia | 12 | <i>RNF41</i>         | 56607001 | rs9919772  | 0.8450 | 57260027 | T | C | 0.33 | 1.03E-02 | 3.18E-02 | 2.21E-01 |
| rs4526799 | Brain_Nucleus_accumbens_basal_ganglia | 12 | <i>PAN2</i>          | 56718979 | rs9919772  | 0.8450 | 57260027 | T | C | 0.33 | 1.03E-02 | 2.71E-02 | 2.17E-01 |
| rs4526799 | Brain_Nucleus_accumbens_basal_ganglia | 12 | <i>TMEM194A</i>      | 57465636 | rs9919772  | 0.8450 | 57260027 | T | C | 0.33 | 1.03E-02 | 1.30E-02 | 2.01E-01 |
| rs4526799 | Brain_Nucleus_accumbens_basal_ganglia | 12 | <i>NAB2</i>          | 57485933 | rs9919772  | 0.8450 | 57260027 | T | C | 0.33 | 1.03E-02 | 4.15E-02 | 2.29E-01 |
| rs4526799 | Brain_Nucleus_accumbens_basal_ganglia | 12 | <i>PMEL</i>          | 56357495 | rs4495925  | 0.8650 | 57268116 | C | G | 0.33 | 1.04E-02 | 2.53E-02 | 2.12E-01 |
| rs4526799 | Brain_Nucleus_accumbens_basal_ganglia | 12 | <i>RP11-603J24.5</i> | 56518610 | rs4495925  | 0.8650 | 57268116 | C | G | 0.33 | 1.04E-02 | 1.55E-02 | 2.02E-01 |
| rs4526799 | Brain_Nucleus_accumbens_basal_ganglia | 12 | <i>RNF41</i>         | 56607001 | rs4495925  | 0.8650 | 57268116 | C | G | 0.33 | 1.04E-02 | 3.10E-02 | 2.17E-01 |
| rs4526799 | Brain_Nucleus_accumbens_basal_ganglia | 12 | <i>PAN2</i>          | 56718979 | rs4495925  | 0.8650 | 57268116 | C | G | 0.33 | 1.04E-02 | 2.87E-02 | 2.15E-01 |
| rs4526799 | Brain_Nucleus_accumbens_basal_ganglia | 12 | <i>TMEM194A</i>      | 57465636 | rs4495925  | 0.8650 | 57268116 | C | G | 0.33 | 1.04E-02 | 1.68E-02 | 2.03E-01 |
| rs4526799 | Brain_Nucleus_accumbens_basal_ganglia | 12 | <i>NAB2</i>          | 57485933 | rs4495925  | 0.8650 | 57268116 | C | G | 0.33 | 1.04E-02 | 3.88E-02 | 2.24E-01 |
| rs4526799 | Brain_Nucleus_accumbens_basal_ganglia | 12 | <i>PMEL</i>          | 56357495 | rs4471472  | 0.8650 | 57268985 | A | G | 0.32 | 9.99E-03 | 3.26E-02 | 2.15E-01 |
| rs4526799 | Brain_Nucleus_accumbens_basal_ganglia | 12 | <i>RP11-603J24.5</i> | 56518610 | rs4471472  | 0.8650 | 57268985 | A | G | 0.32 | 9.99E-03 | 1.68E-02 | 1.99E-01 |
| rs4526799 | Brain_Nucleus_accumbens_basal_ganglia | 12 | <i>RNF41</i>         | 56607001 | rs4471472  | 0.8650 | 57268985 | A | G | 0.32 | 9.99E-03 | 2.82E-02 | 2.11E-01 |
| rs4526799 | Brain_Nucleus_accumbens_basal_ganglia | 12 | <i>PAN2</i>          | 56718979 | rs4471472  | 0.8650 | 57268985 | A | G | 0.32 | 9.99E-03 | 3.20E-02 | 2.15E-01 |
| rs4526799 | Brain_Nucleus_accumbens_basal_ganglia | 12 | <i>TMEM194A</i>      | 57465636 | rs4471472  | 0.8650 | 57268985 | A | G | 0.32 | 9.99E-03 | 1.51E-02 | 1.97E-01 |
| rs4526799 | Brain_Nucleus_accumbens_basal_ganglia | 12 | <i>NAB2</i>          | 57485933 | rs4471472  | 0.8650 | 57268985 | A | G | 0.32 | 9.99E-03 | 4.29E-02 | 2.24E-01 |
| rs4526799 | Brain_Nucleus_accumbens_basal_ganglia | 12 | <i>RP11-603J24.5</i> | 56518610 | rs4633499  | 0.8610 | 57269264 | A | T | 0.32 | 1.43E-02 | 2.77E-02 | 2.45E-01 |
| rs4526799 | Brain_Nucleus_accumbens_basal_ganglia | 12 | <i>RP11-977G19.5</i> | 56570105 | rs4633499  | 0.8610 | 57269264 | A | T | 0.32 | 1.43E-02 | 3.98E-02 | 2.55E-01 |
| rs4526799 | Brain_Nucleus_accumbens_basal_ganglia | 12 | <i>PAN2</i>          | 56718979 | rs4633499  | 0.8610 | 57269264 | A | T | 0.32 | 1.43E-02 | 2.14E-02 | 2.40E-01 |
| rs4526799 | Brain_Nucleus_accumbens_basal_ganglia | 12 | <i>TMEM194A</i>      | 57465636 | rs4633499  | 0.8610 | 57269264 | A | T | 0.32 | 1.43E-02 | 1.91E-02 | 2.38E-01 |
| rs4526799 | Brain_Nucleus_accumbens_basal_ganglia | 12 | <i>B4GALNT1</i>      | 58023536 | rs4633499  | 0.8610 | 57269264 | A | T | 0.32 | 1.43E-02 | 4.62E-02 | 2.59E-01 |
| rs4526799 | Brain_Nucleus_accumbens_basal_ganglia | 12 | <i>RNF41</i>         | 56607001 | rs12300079 | 0.9956 | 57273194 | T | C | 0.36 | 3.73E-03 | 4.91E-02 | 1.83E-01 |
| rs4526799 | Brain_Nucleus_accumbens_basal_ganglia | 12 | <i>BAZ2A</i>         | 57009990 | rs12300079 | 0.9956 | 57273194 | T | C | 0.36 | 3.73E-03 | 3.20E-02 | 1.67E-01 |
| rs4526799 | Brain_Nucleus_accumbens_basal_ganglia | 12 | <i>RNF41</i>         | 56607001 | rs12300191 | 0.9956 | 57273289 | A | G | 0.36 | 3.59E-03 | 4.91E-02 | 1.81E-01 |
| rs4526799 | Brain_Nucleus_accumbens_basal_ganglia | 12 | <i>BAZ2A</i>         | 57009990 | rs12300191 | 0.9956 | 57273289 | A | G | 0.36 | 3.59E-03 | 3.20E-02 | 1.64E-01 |
| rs4526799 | Brain_Nucleus_accumbens_basal_ganglia | 12 | <i>RNF41</i>         | 56607001 | rs4514464  | 0.9956 | 57276375 | C | T | 0.36 | 2.92E-03 | 4.91E-02 | 1.78E-01 |
| rs4526799 | Brain_Nucleus_accumbens_basal_ganglia | 12 | <i>BAZ2A</i>         | 57009990 | rs4514464  | 0.9956 | 57276375 | C | T | 0.36 | 2.92E-03 | 3.20E-02 | 1.61E-01 |
| rs4526799 | Brain_Nucleus_accumbens_basal_ganglia | 12 | <i>RNF41</i>         | 56607001 | rs4417325  | 0.9956 | 57277302 | G | A | 0.36 | 3.59E-03 | 4.91E-02 | 1.81E-01 |
| rs4526799 | Brain_Nucleus_accumbens_basal_ganglia | 12 | <i>BAZ2A</i>         | 57009990 | rs4417325  | 0.9956 | 57277302 | G | A | 0.36 | 3.59E-03 | 3.20E-02 | 1.64E-01 |
| rs4526799 | Brain_Nucleus_accumbens_basal_ganglia | 12 | <i>RNF41</i>         | 56607001 | rs11172030 | 0.9956 | 57278076 | A | C | 0.36 | 3.63E-03 | 4.91E-02 | 1.81E-01 |
| rs4526799 | Brain_Nucleus_accumbens_basal_ganglia | 12 | <i>BAZ2A</i>         | 57009990 | rs11172030 | 0.9956 | 57278076 | A | C | 0.36 | 3.63E-03 | 3.20E-02 | 1.65E-01 |
| rs4526799 | Brain_Nucleus_accumbens_basal_ganglia | 12 | <i>RNF41</i>         | 56607001 | rs10876944 | 0.9956 | 57279372 | T | A | 0.36 | 3.63E-03 | 4.91E-02 | 1.81E-01 |
| rs4526799 | Brain_Nucleus_accumbens_basal_ganglia | 12 | <i>BAZ2A</i>         | 57009990 | rs10876944 | 0.9956 | 57279372 | T | A | 0.36 | 3.63E-03 | 3.20E-02 | 1.65E-01 |
| rs4526799 | Brain_Nucleus_accumbens_basal_ganglia | 12 | <i>RNF41</i>         | 56607001 | rs4326839  | 0.9956 | 57280374 | G | C | 0.36 | 3.58E-03 | 4.91E-02 | 1.81E-01 |
| rs4526799 | Brain_Nucleus_accumbens_basal_ganglia | 12 | <i>BAZ2A</i>         | 57009990 | rs4326839  | 0.9956 | 57280374 | G | C | 0.36 | 3.58E-03 | 3.20E-02 | 1.64E-01 |
| rs4526799 | Brain_Nucleus_accumbens_basal_ganglia | 12 | <i>RNF41</i>         | 56607001 | rs4526799  | 1.0000 | 57280586 | T | C | 0.34 | 7.26E-06 | 4.91E-02 | 8.53E-02 |
| rs4526799 | Brain_Nucleus_accumbens_basal_ganglia | 12 | <i>BAZ2A</i>         | 57009990 | rs4526799  | 1.0000 | 57280586 | T | C | 0.34 | 7.26E-06 | 3.20E-02 | 6.64E-02 |
| rs4526799 | Brain_Nucleus_accumbens_basal_ganglia | 12 | <i>RNF41</i>         | 56607001 | rs28876529 | 0.9956 | 57285301 | T | A | 0.36 | 2.25E-03 | 4.91E-02 | 1.66E-01 |
| rs4526799 | Brain_Nucleus_accumbens_basal_ganglia | 12 | <i>BAZ2A</i>         | 57009990 | rs28876529 | 0.9956 | 57285301 | T | A | 0.36 | 2.25E-03 | 3.20E-02 | 1.49E-01 |
| rs4526799 | Brain_Nucleus_accumbens_basal_ganglia | 12 | <i>RNF41</i>         | 56607001 | rs11172037 | 0.9956 | 57285427 | T | A | 0.36 | 2.25E-03 | 4.91E-02 | 1.66E-01 |

|           |                                       |    |               |          |            |        |          |   |   |      |          |          |          |
|-----------|---------------------------------------|----|---------------|----------|------------|--------|----------|---|---|------|----------|----------|----------|
| rs4526799 | Brain_Nucleus_accumbens_basal_ganglia | 12 | BAZ2A         | 57009990 | rs11172037 | 0.9956 | 57285427 | T | A | 0.36 | 2.25E-03 | 3.20E-02 | 1.49E-01 |
| rs4526799 | Brain_Nucleus_accumbens_basal_ganglia | 12 | RNF41         | 56607001 | rs12321987 | 0.9956 | 57288449 | G | A | 0.36 | 4.47E-03 | 4.91E-02 | 2.01E-01 |
| rs4526799 | Brain_Nucleus_accumbens_basal_ganglia | 12 | BAZ2A         | 57009990 | rs12321987 | 0.9956 | 57288449 | G | A | 0.36 | 4.47E-03 | 3.20E-02 | 1.85E-01 |
| rs4526799 | Brain_Nucleus_accumbens_basal_ganglia | 12 | RP11-977G19.5 | 56570105 | rs11172043 | 0.9869 | 57293182 | G | A | 0.35 | 4.58E-03 | 2.70E-02 | 1.79E-01 |
| rs4526799 | Brain_Nucleus_accumbens_basal_ganglia | 12 | BAZ2A         | 57009990 | rs11172043 | 0.9869 | 57293182 | G | A | 0.35 | 4.58E-03 | 1.78E-02 | 1.68E-01 |
| rs4526799 | Brain_Nucleus_accumbens_basal_ganglia | 12 | HSD17B6       | 57163759 | rs11172043 | 0.9869 | 57293182 | G | A | 0.35 | 4.58E-03 | 7.34E-03 | 1.52E-01 |
| rs4526799 | Brain_Nucleus_accumbens_basal_ganglia | 12 | RP11-977G19.5 | 56570105 | rs12426816 | 0.9869 | 57294074 | A | C | 0.35 | 4.50E-03 | 2.70E-02 | 1.79E-01 |
| rs4526799 | Brain_Nucleus_accumbens_basal_ganglia | 12 | BAZ2A         | 57009990 | rs12426816 | 0.9869 | 57294074 | A | C | 0.35 | 4.50E-03 | 1.78E-02 | 1.68E-01 |
| rs4526799 | Brain_Nucleus_accumbens_basal_ganglia | 12 | HSD17B6       | 57163759 | rs12426816 | 0.9869 | 57294074 | A | C | 0.35 | 4.50E-03 | 7.34E-03 | 1.52E-01 |
| rs4526799 | Brain_Nucleus_accumbens_basal_ganglia | 12 | RP11-977G19.5 | 56570105 | rs11172047 | 0.9869 | 57298080 | T | C | 0.35 | 6.51E-03 | 2.70E-02 | 1.93E-01 |
| rs4526799 | Brain_Nucleus_accumbens_basal_ganglia | 12 | BAZ2A         | 57009990 | rs11172047 | 0.9869 | 57298080 | T | C | 0.35 | 6.51E-03 | 1.78E-02 | 1.83E-01 |
| rs4526799 | Brain_Nucleus_accumbens_basal_ganglia | 12 | HSD17B6       | 57163759 | rs11172047 | 0.9869 | 57298080 | T | C | 0.35 | 6.51E-03 | 7.34E-03 | 1.67E-01 |
| rs4526799 | Brain_Nucleus_accumbens_basal_ganglia | 12 | RP11-977G19.5 | 56570105 | rs2371631  | 0.9869 | 57298614 | T | A | 0.35 | 6.32E-03 | 2.70E-02 | 1.90E-01 |
| rs4526799 | Brain_Nucleus_accumbens_basal_ganglia | 12 | BAZ2A         | 57009990 | rs2371631  | 0.9869 | 57298614 | T | A | 0.35 | 6.32E-03 | 1.78E-02 | 1.79E-01 |
| rs4526799 | Brain_Nucleus_accumbens_basal_ganglia | 12 | HSD17B6       | 57163759 | rs2371631  | 0.9869 | 57298614 | T | A | 0.35 | 6.32E-03 | 7.34E-03 | 1.64E-01 |
| rs4526799 | Brain_Nucleus_accumbens_basal_ganglia | 12 | RP11-977G19.5 | 56570105 | rs12305763 | 0.9869 | 57299263 | G | A | 0.35 | 6.82E-03 | 2.70E-02 | 1.94E-01 |
| rs4526799 | Brain_Nucleus_accumbens_basal_ganglia | 12 | BAZ2A         | 57009990 | rs12305763 | 0.9869 | 57299263 | G | A | 0.35 | 6.82E-03 | 1.78E-02 | 1.84E-01 |
| rs4526799 | Brain_Nucleus_accumbens_basal_ganglia | 12 | HSD17B6       | 57163759 | rs12305763 | 0.9869 | 57299263 | G | A | 0.35 | 6.82E-03 | 7.34E-03 | 1.69E-01 |
| rs4526799 | Brain_Nucleus_accumbens_basal_ganglia | 12 | RP11-603J24.5 | 56518610 | rs11172049 | 0.9128 | 57304203 | T | C | 0.35 | 1.15E-02 | 4.77E-02 | 2.13E-01 |
| rs4526799 | Brain_Nucleus_accumbens_basal_ganglia | 12 | RP11-977G19.5 | 56570105 | rs11172049 | 0.9128 | 57304203 | T | C | 0.35 | 1.15E-02 | 3.94E-02 | 2.06E-01 |
| rs4526799 | Brain_Nucleus_accumbens_basal_ganglia | 12 | HSD17B6       | 57163759 | rs11172049 | 0.9128 | 57304203 | T | C | 0.35 | 1.15E-02 | 9.23E-03 | 1.72E-01 |
| rs4526799 | Brain_Nucleus_accumbens_basal_ganglia | 12 | RP11-603J24.5 | 56518610 | rs1874888  | 0.9085 | 57305138 | A | C | 0.35 | 1.15E-02 | 4.77E-02 | 2.13E-01 |
| rs4526799 | Brain_Nucleus_accumbens_basal_ganglia | 12 | RP11-977G19.5 | 56570105 | rs1874888  | 0.9085 | 57305138 | A | C | 0.35 | 1.15E-02 | 3.94E-02 | 2.06E-01 |
| rs4526799 | Brain_Nucleus_accumbens_basal_ganglia | 12 | HSD17B6       | 57163759 | rs1874888  | 0.9085 | 57305138 | A | C | 0.35 | 1.15E-02 | 9.23E-03 | 1.72E-01 |
| rs4526799 | Brain_Nucleus_accumbens_basal_ganglia | 12 | RP11-977G19.5 | 56570105 | rs10506349 | 0.9128 | 57306412 | T | C | 0.37 | 1.10E-02 | 4.04E-02 | 1.98E-01 |
| rs4526799 | Brain_Nucleus_accumbens_basal_ganglia | 12 | NABP2         | 56619718 | rs10506349 | 0.9128 | 57306412 | T | C | 0.37 | 1.10E-02 | 2.01E-02 | 1.78E-01 |
| rs4526799 | Brain_Nucleus_accumbens_basal_ganglia | 12 | HSD17B6       | 57163759 | rs10506349 | 0.9128 | 57306412 | T | C | 0.37 | 1.10E-02 | 2.49E-02 | 1.83E-01 |
| rs4526799 | Brain_Nucleus_accumbens_basal_ganglia | 12 | DDIT3         | 57912369 | rs10506349 | 0.9128 | 57306412 | T | C | 0.37 | 1.10E-02 | 3.37E-02 | 1.92E-01 |
| rs4526799 | Brain_Nucleus_accumbens_basal_ganglia | 12 | B4GALNT1      | 58023536 | rs10506349 | 0.9128 | 57306412 | T | C | 0.37 | 1.10E-02 | 4.84E-03 | 1.53E-01 |
| rs4526799 | Brain_Nucleus_accumbens_basal_ganglia | 12 | RP11-603J24.5 | 56518610 | rs10876951 | 0.9085 | 57306430 | T | G | 0.35 | 1.15E-02 | 4.77E-02 | 2.13E-01 |
| rs4526799 | Brain_Nucleus_accumbens_basal_ganglia | 12 | RP11-977G19.5 | 56570105 | rs10876951 | 0.9085 | 57306430 | T | G | 0.35 | 1.15E-02 | 3.94E-02 | 2.06E-01 |
| rs4526799 | Brain_Nucleus_accumbens_basal_ganglia | 12 | HSD17B6       | 57163759 | rs10876951 | 0.9085 | 57306430 | T | G | 0.35 | 1.15E-02 | 9.23E-03 | 1.72E-01 |
| rs4526799 | Brain_Nucleus_accumbens_basal_ganglia | 12 | RP11-977G19.5 | 56570105 | rs10747774 | 0.9128 | 57307079 | T | C | 0.36 | 1.16E-02 | 4.29E-02 | 2.05E-01 |
| rs4526799 | Brain_Nucleus_accumbens_basal_ganglia | 12 | NABP2         | 56619718 | rs10747774 | 0.9128 | 57307079 | T | C | 0.36 | 1.16E-02 | 1.79E-02 | 1.80E-01 |
| rs4526799 | Brain_Nucleus_accumbens_basal_ganglia | 12 | HSD17B6       | 57163759 | rs10747774 | 0.9128 | 57307079 | T | C | 0.36 | 1.16E-02 | 2.28E-02 | 1.86E-01 |
| rs4526799 | Brain_Nucleus_accumbens_basal_ganglia | 12 | DDIT3         | 57912369 | rs10747774 | 0.9128 | 57307079 | T | C | 0.36 | 1.16E-02 | 3.27E-02 | 1.96E-01 |
| rs4526799 | Brain_Nucleus_accumbens_basal_ganglia | 12 | B4GALNT1      | 58023536 | rs10747774 | 0.9128 | 57307079 | T | C | 0.36 | 1.16E-02 | 4.85E-03 | 1.59E-01 |
| rs4526799 | Brain_Nucleus_accumbens_basal_ganglia | 12 | RP11-603J24.5 | 56518610 | rs10783812 | 0.9085 | 57308723 | C | T | 0.35 | 1.19E-02 | 4.86E-02 | 2.16E-01 |
| rs4526799 | Brain_Nucleus_accumbens_basal_ganglia | 12 | RP11-977G19.5 | 56570105 | rs10783812 | 0.9085 | 57308723 | C | T | 0.35 | 1.19E-02 | 4.58E-02 | 2.14E-01 |
| rs4526799 | Brain_Nucleus_accumbens_basal_ganglia | 12 | HSD17B6       | 57163759 | rs10783812 | 0.9085 | 57308723 | C | T | 0.35 | 1.19E-02 | 1.10E-02 | 1.78E-01 |

|           |                                       |    |                       |          |            |        |          |   |   |      |          |          |          |
|-----------|---------------------------------------|----|-----------------------|----------|------------|--------|----------|---|---|------|----------|----------|----------|
| rs4526799 | Brain_Nucleus_accumbens_basal_ganglia | 12 | <i>RP11-977G19.5</i>  | 56570105 | rs11172056 | 0.9089 | 57308975 | C | T | 0.37 | 1.10E-02 | 4.29E-02 | 2.00E-01 |
| rs4526799 | Brain_Nucleus_accumbens_basal_ganglia | 12 | <i>NABP2</i>          | 56619718 | rs11172056 | 0.9089 | 57308975 | C | T | 0.37 | 1.10E-02 | 1.79E-02 | 1.75E-01 |
| rs4526799 | Brain_Nucleus_accumbens_basal_ganglia | 12 | <i>HSD17B6</i>        | 57163759 | rs11172056 | 0.9089 | 57308975 | C | T | 0.37 | 1.10E-02 | 2.28E-02 | 1.81E-01 |
| rs4526799 | Brain_Nucleus_accumbens_basal_ganglia | 12 | <i>DDIT3</i>          | 57912369 | rs11172056 | 0.9089 | 57308975 | C | T | 0.37 | 1.10E-02 | 3.27E-02 | 1.91E-01 |
| rs4526799 | Brain_Nucleus_accumbens_basal_ganglia | 12 | <i>B4GALNT1</i>       | 58023536 | rs11172056 | 0.9089 | 57308975 | C | T | 0.37 | 1.10E-02 | 4.85E-03 | 1.54E-01 |
| rs4526799 | Brain_Nucleus_accumbens_basal_ganglia | 12 | <i>RP11-977G19.5</i>  | 56570105 | rs7302420  | 0.9085 | 57309884 | G | C | 0.36 | 1.54E-02 | 3.97E-02 | 2.24E-01 |
| rs4526799 | Brain_Nucleus_accumbens_basal_ganglia | 12 | <i>NABP2</i>          | 56619718 | rs7302420  | 0.9085 | 57309884 | G | C | 0.36 | 1.54E-02 | 1.60E-02 | 2.02E-01 |
| rs4526799 | Brain_Nucleus_accumbens_basal_ganglia | 12 | <i>HSD17B6</i>        | 57163759 | rs7302420  | 0.9085 | 57309884 | G | C | 0.36 | 1.54E-02 | 1.64E-02 | 2.02E-01 |
| rs4526799 | Brain_Nucleus_accumbens_basal_ganglia | 12 | <i>DDIT3</i>          | 57912369 | rs7302420  | 0.9085 | 57309884 | G | C | 0.36 | 1.54E-02 | 4.86E-02 | 2.31E-01 |
| rs4526799 | Brain_Nucleus_accumbens_basal_ganglia | 12 | <i>B4GALNT1</i>       | 58023536 | rs7302420  | 0.9085 | 57309884 | G | C | 0.36 | 1.54E-02 | 1.67E-02 | 2.02E-01 |
| rs4526799 | Brain_Nucleus_accumbens_basal_ganglia | 12 | <i>NABP2</i>          | 56619718 | rs12228618 | 0.9128 | 57311229 | T | C | 0.37 | 1.29E-02 | 3.20E-02 | 1.99E-01 |
| rs4526799 | Brain_Nucleus_accumbens_basal_ganglia | 12 | <i>SDR9C7</i>         | 57322563 | rs12228618 | 0.9128 | 57311229 | T | C | 0.37 | 1.29E-02 | 3.31E-02 | 2.00E-01 |
| rs4526799 | Brain_Nucleus_accumbens_basal_ganglia | 12 | <i>NAB2</i>           | 57485933 | rs12228618 | 0.9128 | 57311229 | T | C | 0.37 | 1.29E-02 | 4.01E-02 | 2.06E-01 |
| rs4526799 | Brain_Nucleus_accumbens_basal_ganglia | 12 | <i>B4GALNT1</i>       | 58023536 | rs12228618 | 0.9128 | 57311229 | T | C | 0.37 | 1.29E-02 | 2.68E-03 | 1.57E-01 |
| rs4526799 | Brain_Nucleus_accumbens_basal_ganglia | 12 | <i>NABP2</i>          | 56619718 | rs9739473  | 0.9012 | 57313335 | A | T | 0.37 | 2.65E-02 | 2.49E-02 | 2.60E-01 |
| rs4526799 | Brain_Nucleus_accumbens_basal_ganglia | 12 | <i>SDR9C7</i>         | 57322563 | rs9739473  | 0.9012 | 57313335 | A | T | 0.37 | 2.65E-02 | 4.63E-02 | 2.75E-01 |
| rs4526799 | Brain_Nucleus_accumbens_basal_ganglia | 12 | <i>NAB2</i>           | 57485933 | rs9739473  | 0.9012 | 57313335 | A | T | 0.37 | 2.65E-02 | 4.81E-02 | 2.77E-01 |
| rs4526799 | Brain_Nucleus_accumbens_basal_ganglia | 12 | <i>B4GALNT1</i>       | 58023536 | rs9739473  | 0.9012 | 57313335 | A | T | 0.37 | 2.65E-02 | 3.66E-03 | 2.34E-01 |
| rs4526799 | Brain_Nucleus_accumbens_basal_ganglia | 12 | <i>TSFM</i>           | 58189113 | rs9739473  | 0.9012 | 57313335 | A | T | 0.37 | 2.65E-02 | 3.91E-02 | 2.71E-01 |
| rs4526799 | Brain_Putamen_basal_ganglia           | 12 | <i>CDK2</i>           | 56363560 | rs9919772  | 0.8450 | 57260027 | T | C | 0.33 | 1.03E-02 | 4.15E-02 | 2.29E-01 |
| rs4526799 | Brain_Putamen_basal_ganglia           | 12 | <i>RPS26</i>          | 56436876 | rs9919772  | 0.8450 | 57260027 | T | C | 0.33 | 1.03E-02 | 3.00E-02 | 2.19E-01 |
| rs4526799 | Brain_Putamen_basal_ganglia           | 12 | <i>MYL6B</i>          | 56548905 | rs9919772  | 0.8450 | 57260027 | T | C | 0.33 | 1.03E-02 | 6.28E-03 | 1.91E-01 |
| rs4526799 | Brain_Putamen_basal_ganglia           | 12 | <i>CS</i>             | 56679829 | rs9919772  | 0.8450 | 57260027 | T | C | 0.33 | 1.03E-02 | 1.59E-02 | 2.05E-01 |
| rs4526799 | Brain_Putamen_basal_ganglia           | 12 | <i>RP11-977G19.11</i> | 56701259 | rs9919772  | 0.8450 | 57260027 | T | C | 0.33 | 1.03E-02 | 1.17E-02 | 2.00E-01 |
| rs4526799 | Brain_Putamen_basal_ganglia           | 12 | <i>IL23A</i>          | 56733428 | rs9919772  | 0.8450 | 57260027 | T | C | 0.33 | 1.03E-02 | 3.75E-02 | 2.26E-01 |
| rs4526799 | Brain_Putamen_basal_ganglia           | 12 | <i>NAB2</i>           | 57485933 | rs9919772  | 0.8450 | 57260027 | T | C | 0.33 | 1.03E-02 | 3.51E-02 | 2.24E-01 |
| rs4526799 | Brain_Putamen_basal_ganglia           | 12 | <i>AVIL</i>           | 58201929 | rs9919772  | 0.8450 | 57260027 | T | C | 0.33 | 1.03E-02 | 1.04E-02 | 1.98E-01 |
| rs4526799 | Brain_Putamen_basal_ganglia           | 12 | <i>RPS26</i>          | 56436876 | rs4495925  | 0.8650 | 57268116 | C | G | 0.33 | 1.04E-02 | 1.22E-02 | 1.97E-01 |
| rs4526799 | Brain_Putamen_basal_ganglia           | 12 | <i>MYL6B</i>          | 56548905 | rs4495925  | 0.8650 | 57268116 | C | G | 0.33 | 1.04E-02 | 1.61E-02 | 2.02E-01 |
| rs4526799 | Brain_Putamen_basal_ganglia           | 12 | <i>CS</i>             | 56679829 | rs4495925  | 0.8650 | 57268116 | C | G | 0.33 | 1.04E-02 | 2.25E-02 | 2.09E-01 |
| rs4526799 | Brain_Putamen_basal_ganglia           | 12 | <i>RP11-977G19.11</i> | 56701259 | rs4495925  | 0.8650 | 57268116 | C | G | 0.33 | 1.04E-02 | 1.65E-02 | 2.03E-01 |
| rs4526799 | Brain_Putamen_basal_ganglia           | 12 | <i>IL23A</i>          | 56733428 | rs4495925  | 0.8650 | 57268116 | C | G | 0.33 | 1.04E-02 | 3.60E-02 | 2.22E-01 |
| rs4526799 | Brain_Putamen_basal_ganglia           | 12 | <i>NAB2</i>           | 57485933 | rs4495925  | 0.8650 | 57268116 | C | G | 0.33 | 1.04E-02 | 2.16E-02 | 2.08E-01 |
| rs4526799 | Brain_Putamen_basal_ganglia           | 12 | <i>AVIL</i>           | 58201929 | rs4495925  | 0.8650 | 57268116 | C | G | 0.33 | 1.04E-02 | 1.52E-02 | 2.01E-01 |
| rs4526799 | Brain_Putamen_basal_ganglia           | 12 | <i>RPS26</i>          | 56436876 | rs4471472  | 0.8650 | 57268985 | A | G | 0.32 | 9.99E-03 | 1.26E-02 | 1.94E-01 |
| rs4526799 | Brain_Putamen_basal_ganglia           | 12 | <i>MYL6B</i>          | 56548905 | rs4471472  | 0.8650 | 57268985 | A | G | 0.32 | 9.99E-03 | 1.92E-02 | 2.02E-01 |
| rs4526799 | Brain_Putamen_basal_ganglia           | 12 | <i>CS</i>             | 56679829 | rs4471472  | 0.8650 | 57268985 | A | G | 0.32 | 9.99E-03 | 2.18E-02 | 2.05E-01 |
| rs4526799 | Brain_Putamen_basal_ganglia           | 12 | <i>RP11-977G19.11</i> | 56701259 | rs4471472  | 0.8650 | 57268985 | A | G | 0.32 | 9.99E-03 | 1.98E-02 | 2.03E-01 |
| rs4526799 | Brain_Putamen_basal_ganglia           | 12 | <i>IL23A</i>          | 56733428 | rs4471472  | 0.8650 | 57268985 | A | G | 0.32 | 9.99E-03 | 3.24E-02 | 2.15E-01 |
| rs4526799 | Brain_Putamen_basal_ganglia           | 12 | <i>NAB2</i>           | 57485933 | rs4471472  | 0.8650 | 57268985 | A | G | 0.32 | 9.99E-03 | 2.58E-02 | 2.09E-01 |

|           |                             |    |                |          |            |        |          |   |   |      |          |          |          |
|-----------|-----------------------------|----|----------------|----------|------------|--------|----------|---|---|------|----------|----------|----------|
| rs4526799 | Brain_Putamen_basal_ganglia | 12 | AVIL           | 58201929 | rs4471472  | 0.8650 | 57268985 | A | G | 0.32 | 9.99E-03 | 1.32E-02 | 1.95E-01 |
| rs4526799 | Brain_Putamen_basal_ganglia | 12 | WIBG           | 56310770 | rs4633499  | 0.8610 | 57269264 | A | T | 0.32 | 1.43E-02 | 4.30E-02 | 2.57E-01 |
| rs4526799 | Brain_Putamen_basal_ganglia | 12 | RPS26          | 56436876 | rs4633499  | 0.8610 | 57269264 | A | T | 0.32 | 1.43E-02 | 1.00E-02 | 2.27E-01 |
| rs4526799 | Brain_Putamen_basal_ganglia | 12 | MYL6B          | 56548905 | rs4633499  | 0.8610 | 57269264 | A | T | 0.32 | 1.43E-02 | 3.52E-02 | 2.51E-01 |
| rs4526799 | Brain_Putamen_basal_ganglia | 12 | NABP2          | 56619718 | rs4633499  | 0.8610 | 57269264 | A | T | 0.32 | 1.43E-02 | 3.42E-02 | 2.51E-01 |
| rs4526799 | Brain_Putamen_basal_ganglia | 12 | CS             | 56679829 | rs4633499  | 0.8610 | 57269264 | A | T | 0.32 | 1.43E-02 | 1.60E-02 | 2.34E-01 |
| rs4526799 | Brain_Putamen_basal_ganglia | 12 | RP11-977G19.11 | 56701259 | rs4633499  | 0.8610 | 57269264 | A | T | 0.32 | 1.43E-02 | 2.61E-02 | 2.44E-01 |
| rs4526799 | Brain_Putamen_basal_ganglia | 12 | PAN2           | 56718979 | rs4633499  | 0.8610 | 57269264 | A | T | 0.32 | 1.43E-02 | 3.34E-02 | 2.50E-01 |
| rs4526799 | Brain_Putamen_basal_ganglia | 12 | IL23A          | 56733428 | rs4633499  | 0.8610 | 57269264 | A | T | 0.32 | 1.43E-02 | 1.40E-02 | 2.32E-01 |
| rs4526799 | Brain_Putamen_basal_ganglia | 12 | NAB2           | 57485933 | rs4633499  | 0.8610 | 57269264 | A | T | 0.32 | 1.43E-02 | 2.77E-02 | 2.45E-01 |
| rs4526799 | Brain_Putamen_basal_ganglia | 12 | AVIL           | 58201929 | rs4633499  | 0.8610 | 57269264 | A | T | 0.32 | 1.43E-02 | 1.85E-02 | 2.37E-01 |
| rs4526799 | Brain_Putamen_basal_ganglia | 12 | WIBG           | 56310770 | rs12300079 | 0.9956 | 57273194 | T | C | 0.36 | 3.73E-03 | 3.45E-02 | 1.69E-01 |
| rs4526799 | Brain_Putamen_basal_ganglia | 12 | CDK2           | 56363560 | rs12300079 | 0.9956 | 57273194 | T | C | 0.36 | 3.73E-03 | 1.90E-02 | 1.52E-01 |
| rs4526799 | Brain_Putamen_basal_ganglia | 12 | RPS26          | 56436876 | rs12300079 | 0.9956 | 57273194 | T | C | 0.36 | 3.73E-03 | 1.38E-02 | 1.45E-01 |
| rs4526799 | Brain_Putamen_basal_ganglia | 12 | MYL6B          | 56548905 | rs12300079 | 0.9956 | 57273194 | T | C | 0.36 | 3.73E-03 | 1.59E-02 | 1.48E-01 |
| rs4526799 | Brain_Putamen_basal_ganglia | 12 | NABP2          | 56619718 | rs12300079 | 0.9956 | 57273194 | T | C | 0.36 | 3.73E-03 | 3.66E-02 | 1.71E-01 |
| rs4526799 | Brain_Putamen_basal_ganglia | 12 | CS             | 56679829 | rs12300079 | 0.9956 | 57273194 | T | C | 0.36 | 3.73E-03 | 3.12E-02 | 1.66E-01 |
| rs4526799 | Brain_Putamen_basal_ganglia | 12 | RP11-977G19.11 | 56701259 | rs12300079 | 0.9956 | 57273194 | T | C | 0.36 | 3.73E-03 | 3.55E-02 | 1.70E-01 |
| rs4526799 | Brain_Putamen_basal_ganglia | 12 | IL23A          | 56733428 | rs12300079 | 0.9956 | 57273194 | T | C | 0.36 | 3.73E-03 | 1.97E-02 | 1.53E-01 |
| rs4526799 | Brain_Putamen_basal_ganglia | 12 | NAB2           | 57485933 | rs12300079 | 0.9956 | 57273194 | T | C | 0.36 | 3.73E-03 | 7.23E-03 | 1.33E-01 |
| rs4526799 | Brain_Putamen_basal_ganglia | 12 | INHBE          | 57849584 | rs12300079 | 0.9956 | 57273194 | T | C | 0.36 | 3.73E-03 | 3.79E-02 | 1.72E-01 |
| rs4526799 | Brain_Putamen_basal_ganglia | 12 | AVIL           | 58201929 | rs12300079 | 0.9956 | 57273194 | T | C | 0.36 | 3.73E-03 | 2.01E-02 | 1.53E-01 |
| rs4526799 | Brain_Putamen_basal_ganglia | 12 | WIBG           | 56310770 | rs12300191 | 0.9956 | 57273289 | A | G | 0.36 | 3.59E-03 | 3.45E-02 | 1.67E-01 |
| rs4526799 | Brain_Putamen_basal_ganglia | 12 | CDK2           | 56363560 | rs12300191 | 0.9956 | 57273289 | A | G | 0.36 | 3.59E-03 | 1.90E-02 | 1.49E-01 |
| rs4526799 | Brain_Putamen_basal_ganglia | 12 | RPS26          | 56436876 | rs12300191 | 0.9956 | 57273289 | A | G | 0.36 | 3.59E-03 | 1.38E-02 | 1.42E-01 |
| rs4526799 | Brain_Putamen_basal_ganglia | 12 | MYL6B          | 56548905 | rs12300191 | 0.9956 | 57273289 | A | G | 0.36 | 3.59E-03 | 1.59E-02 | 1.45E-01 |
| rs4526799 | Brain_Putamen_basal_ganglia | 12 | NABP2          | 56619718 | rs12300191 | 0.9956 | 57273289 | A | G | 0.36 | 3.59E-03 | 3.66E-02 | 1.69E-01 |
| rs4526799 | Brain_Putamen_basal_ganglia | 12 | CS             | 56679829 | rs12300191 | 0.9956 | 57273289 | A | G | 0.36 | 3.59E-03 | 3.12E-02 | 1.63E-01 |
| rs4526799 | Brain_Putamen_basal_ganglia | 12 | RP11-977G19.11 | 56701259 | rs12300191 | 0.9956 | 57273289 | A | G | 0.36 | 3.59E-03 | 3.55E-02 | 1.68E-01 |
| rs4526799 | Brain_Putamen_basal_ganglia | 12 | IL23A          | 56733428 | rs12300191 | 0.9956 | 57273289 | A | G | 0.36 | 3.59E-03 | 1.97E-02 | 1.50E-01 |
| rs4526799 | Brain_Putamen_basal_ganglia | 12 | NAB2           | 57485933 | rs12300191 | 0.9956 | 57273289 | A | G | 0.36 | 3.59E-03 | 7.23E-03 | 1.31E-01 |
| rs4526799 | Brain_Putamen_basal_ganglia | 12 | INHBE          | 57849584 | rs12300191 | 0.9956 | 57273289 | A | G | 0.36 | 3.59E-03 | 3.79E-02 | 1.70E-01 |
| rs4526799 | Brain_Putamen_basal_ganglia | 12 | AVIL           | 58201929 | rs12300191 | 0.9956 | 57273289 | A | G | 0.36 | 3.59E-03 | 2.01E-02 | 1.51E-01 |
| rs4526799 | Brain_Putamen_basal_ganglia | 12 | WIBG           | 56310770 | rs4514464  | 0.9956 | 57276375 | C | T | 0.36 | 2.92E-03 | 3.45E-02 | 1.64E-01 |
| rs4526799 | Brain_Putamen_basal_ganglia | 12 | CDK2           | 56363560 | rs4514464  | 0.9956 | 57276375 | C | T | 0.36 | 2.92E-03 | 1.90E-02 | 1.46E-01 |
| rs4526799 | Brain_Putamen_basal_ganglia | 12 | RPS26          | 56436876 | rs4514464  | 0.9956 | 57276375 | C | T | 0.36 | 2.92E-03 | 1.38E-02 | 1.39E-01 |
| rs4526799 | Brain_Putamen_basal_ganglia | 12 | MYL6B          | 56548905 | rs4514464  | 0.9956 | 57276375 | C | T | 0.36 | 2.92E-03 | 1.59E-02 | 1.42E-01 |
| rs4526799 | Brain_Putamen_basal_ganglia | 12 | NABP2          | 56619718 | rs4514464  | 0.9956 | 57276375 | C | T | 0.36 | 2.92E-03 | 3.66E-02 | 1.66E-01 |
| rs4526799 | Brain_Putamen_basal_ganglia | 12 | CS             | 56679829 | rs4514464  | 0.9956 | 57276375 | C | T | 0.36 | 2.92E-03 | 3.12E-02 | 1.60E-01 |
| rs4526799 | Brain_Putamen_basal_ganglia | 12 | RP11-977G19.11 | 56701259 | rs4514464  | 0.9956 | 57276375 | C | T | 0.36 | 2.92E-03 | 3.55E-02 | 1.65E-01 |

|           |                             |    |                       |          |            |        |          |   |   |      |          |          |          |
|-----------|-----------------------------|----|-----------------------|----------|------------|--------|----------|---|---|------|----------|----------|----------|
| rs4526799 | Brain_Putamen_basal_ganglia | 12 | <i>IL23A</i>          | 56733428 | rs4514464  | 0.9956 | 57276375 | C | T | 0.36 | 2.92E-03 | 1.97E-02 | 1.47E-01 |
| rs4526799 | Brain_Putamen_basal_ganglia | 12 | <i>NAB2</i>           | 57485933 | rs4514464  | 0.9956 | 57276375 | C | T | 0.36 | 2.92E-03 | 7.23E-03 | 1.28E-01 |
| rs4526799 | Brain_Putamen_basal_ganglia | 12 | <i>INHBE</i>          | 57849584 | rs4514464  | 0.9956 | 57276375 | C | T | 0.36 | 2.92E-03 | 3.79E-02 | 1.67E-01 |
| rs4526799 | Brain_Putamen_basal_ganglia | 12 | <i>AVIL</i>           | 58201929 | rs4514464  | 0.9956 | 57276375 | C | T | 0.36 | 2.92E-03 | 2.01E-02 | 1.48E-01 |
| rs4526799 | Brain_Putamen_basal_ganglia | 12 | <i>WIBG</i>           | 56310770 | rs4417325  | 0.9956 | 57277302 | G | A | 0.36 | 3.59E-03 | 3.45E-02 | 1.67E-01 |
| rs4526799 | Brain_Putamen_basal_ganglia | 12 | <i>CDK2</i>           | 56363560 | rs4417325  | 0.9956 | 57277302 | G | A | 0.36 | 3.59E-03 | 1.90E-02 | 1.49E-01 |
| rs4526799 | Brain_Putamen_basal_ganglia | 12 | <i>RPS26</i>          | 56436876 | rs4417325  | 0.9956 | 57277302 | G | A | 0.36 | 3.59E-03 | 1.38E-02 | 1.42E-01 |
| rs4526799 | Brain_Putamen_basal_ganglia | 12 | <i>MYL6B</i>          | 56548905 | rs4417325  | 0.9956 | 57277302 | G | A | 0.36 | 3.59E-03 | 1.59E-02 | 1.45E-01 |
| rs4526799 | Brain_Putamen_basal_ganglia | 12 | <i>NABP2</i>          | 56619718 | rs4417325  | 0.9956 | 57277302 | G | A | 0.36 | 3.59E-03 | 3.66E-02 | 1.69E-01 |
| rs4526799 | Brain_Putamen_basal_ganglia | 12 | <i>CS</i>             | 56679829 | rs4417325  | 0.9956 | 57277302 | G | A | 0.36 | 3.59E-03 | 3.12E-02 | 1.63E-01 |
| rs4526799 | Brain_Putamen_basal_ganglia | 12 | <i>RP11-977G19.11</i> | 56701259 | rs4417325  | 0.9956 | 57277302 | G | A | 0.36 | 3.59E-03 | 3.55E-02 | 1.68E-01 |
| rs4526799 | Brain_Putamen_basal_ganglia | 12 | <i>IL23A</i>          | 56733428 | rs4417325  | 0.9956 | 57277302 | G | A | 0.36 | 3.59E-03 | 1.97E-02 | 1.50E-01 |
| rs4526799 | Brain_Putamen_basal_ganglia | 12 | <i>NAB2</i>           | 57485933 | rs4417325  | 0.9956 | 57277302 | G | A | 0.36 | 3.59E-03 | 7.23E-03 | 1.31E-01 |
| rs4526799 | Brain_Putamen_basal_ganglia | 12 | <i>INHBE</i>          | 57849584 | rs4417325  | 0.9956 | 57277302 | G | A | 0.36 | 3.59E-03 | 3.79E-02 | 1.70E-01 |
| rs4526799 | Brain_Putamen_basal_ganglia | 12 | <i>AVIL</i>           | 58201929 | rs4417325  | 0.9956 | 57277302 | G | A | 0.36 | 3.59E-03 | 2.01E-02 | 1.51E-01 |
| rs4526799 | Brain_Putamen_basal_ganglia | 12 | <i>WIBG</i>           | 56310770 | rs11172030 | 0.9956 | 57278076 | A | C | 0.36 | 3.63E-03 | 3.45E-02 | 1.67E-01 |
| rs4526799 | Brain_Putamen_basal_ganglia | 12 | <i>CDK2</i>           | 56363560 | rs11172030 | 0.9956 | 57278076 | A | C | 0.36 | 3.63E-03 | 1.90E-02 | 1.50E-01 |
| rs4526799 | Brain_Putamen_basal_ganglia | 12 | <i>RPS26</i>          | 56436876 | rs11172030 | 0.9956 | 57278076 | A | C | 0.36 | 3.63E-03 | 1.38E-02 | 1.43E-01 |
| rs4526799 | Brain_Putamen_basal_ganglia | 12 | <i>MYL6B</i>          | 56548905 | rs11172030 | 0.9956 | 57278076 | A | C | 0.36 | 3.63E-03 | 1.59E-02 | 1.46E-01 |
| rs4526799 | Brain_Putamen_basal_ganglia | 12 | <i>NABP2</i>          | 56619718 | rs11172030 | 0.9956 | 57278076 | A | C | 0.36 | 3.63E-03 | 3.66E-02 | 1.69E-01 |
| rs4526799 | Brain_Putamen_basal_ganglia | 12 | <i>CS</i>             | 56679829 | rs11172030 | 0.9956 | 57278076 | A | C | 0.36 | 3.63E-03 | 3.12E-02 | 1.64E-01 |
| rs4526799 | Brain_Putamen_basal_ganglia | 12 | <i>RP11-977G19.11</i> | 56701259 | rs11172030 | 0.9956 | 57278076 | A | C | 0.36 | 3.63E-03 | 3.55E-02 | 1.68E-01 |
| rs4526799 | Brain_Putamen_basal_ganglia | 12 | <i>IL23A</i>          | 56733428 | rs11172030 | 0.9956 | 57278076 | A | C | 0.36 | 3.63E-03 | 1.97E-02 | 1.51E-01 |
| rs4526799 | Brain_Putamen_basal_ganglia | 12 | <i>NAB2</i>           | 57485933 | rs11172030 | 0.9956 | 57278076 | A | C | 0.36 | 3.63E-03 | 7.23E-03 | 1.31E-01 |
| rs4526799 | Brain_Putamen_basal_ganglia | 12 | <i>INHBE</i>          | 57849584 | rs11172030 | 0.9956 | 57278076 | A | C | 0.36 | 3.63E-03 | 3.79E-02 | 1.71E-01 |
| rs4526799 | Brain_Putamen_basal_ganglia | 12 | <i>AVIL</i>           | 58201929 | rs11172030 | 0.9956 | 57278076 | A | C | 0.36 | 3.63E-03 | 2.01E-02 | 1.51E-01 |
| rs4526799 | Brain_Putamen_basal_ganglia | 12 | <i>WIBG</i>           | 56310770 | rs10876944 | 0.9956 | 57279372 | T | A | 0.36 | 3.63E-03 | 3.45E-02 | 1.67E-01 |
| rs4526799 | Brain_Putamen_basal_ganglia | 12 | <i>CDK2</i>           | 56363560 | rs10876944 | 0.9956 | 57279372 | T | A | 0.36 | 3.63E-03 | 1.90E-02 | 1.50E-01 |
| rs4526799 | Brain_Putamen_basal_ganglia | 12 | <i>RPS26</i>          | 56436876 | rs10876944 | 0.9956 | 57279372 | T | A | 0.36 | 3.63E-03 | 1.38E-02 | 1.43E-01 |
| rs4526799 | Brain_Putamen_basal_ganglia | 12 | <i>MYL6B</i>          | 56548905 | rs10876944 | 0.9956 | 57279372 | T | A | 0.36 | 3.63E-03 | 1.59E-02 | 1.46E-01 |
| rs4526799 | Brain_Putamen_basal_ganglia | 12 | <i>NABP2</i>          | 56619718 | rs10876944 | 0.9956 | 57279372 | T | A | 0.36 | 3.63E-03 | 3.66E-02 | 1.69E-01 |
| rs4526799 | Brain_Putamen_basal_ganglia | 12 | <i>CS</i>             | 56679829 | rs10876944 | 0.9956 | 57279372 | T | A | 0.36 | 3.63E-03 | 3.12E-02 | 1.64E-01 |
| rs4526799 | Brain_Putamen_basal_ganglia | 12 | <i>RP11-977G19.11</i> | 56701259 | rs10876944 | 0.9956 | 57279372 | T | A | 0.36 | 3.63E-03 | 3.55E-02 | 1.68E-01 |
| rs4526799 | Brain_Putamen_basal_ganglia | 12 | <i>IL23A</i>          | 56733428 | rs10876944 | 0.9956 | 57279372 | T | A | 0.36 | 3.63E-03 | 1.97E-02 | 1.51E-01 |
| rs4526799 | Brain_Putamen_basal_ganglia | 12 | <i>NAB2</i>           | 57485933 | rs10876944 | 0.9956 | 57279372 | T | A | 0.36 | 3.63E-03 | 7.23E-03 | 1.31E-01 |
| rs4526799 | Brain_Putamen_basal_ganglia | 12 | <i>INHBE</i>          | 57849584 | rs10876944 | 0.9956 | 57279372 | T | A | 0.36 | 3.63E-03 | 3.79E-02 | 1.71E-01 |
| rs4526799 | Brain_Putamen_basal_ganglia | 12 | <i>AVIL</i>           | 58201929 | rs10876944 | 0.9956 | 57279372 | T | A | 0.36 | 3.63E-03 | 2.01E-02 | 1.51E-01 |
| rs4526799 | Brain_Putamen_basal_ganglia | 12 | <i>WIBG</i>           | 56310770 | rs4326839  | 0.9956 | 57280374 | G | C | 0.36 | 3.58E-03 | 3.45E-02 | 1.67E-01 |
| rs4526799 | Brain_Putamen_basal_ganglia | 12 | <i>CDK2</i>           | 56363560 | rs4326839  | 0.9956 | 57280374 | G | C | 0.36 | 3.58E-03 | 1.90E-02 | 1.49E-01 |
| rs4526799 | Brain_Putamen_basal_ganglia | 12 | <i>RPS26</i>          | 56436876 | rs4326839  | 0.9956 | 57280374 | G | C | 0.36 | 3.58E-03 | 1.38E-02 | 1.42E-01 |



|           |                             |    |                |          |            |        |          |   |   |      |          |          |          |
|-----------|-----------------------------|----|----------------|----------|------------|--------|----------|---|---|------|----------|----------|----------|
| rs4526799 | Brain_Putamen_basal_ganglia | 12 | MYL6B          | 56548905 | rs4326839  | 0.9956 | 57280374 | G | C | 0.36 | 3.58E-03 | 1.59E-02 | 1.45E-01 |
| rs4526799 | Brain_Putamen_basal_ganglia | 12 | NABP2          | 56619718 | rs4326839  | 0.9956 | 57280374 | G | C | 0.36 | 3.58E-03 | 3.66E-02 | 1.69E-01 |
| rs4526799 | Brain_Putamen_basal_ganglia | 12 | CS             | 56679829 | rs4326839  | 0.9956 | 57280374 | G | C | 0.36 | 3.58E-03 | 3.12E-02 | 1.63E-01 |
| rs4526799 | Brain_Putamen_basal_ganglia | 12 | RP11-977G19.11 | 56701259 | rs4326839  | 0.9956 | 57280374 | G | C | 0.36 | 3.58E-03 | 3.55E-02 | 1.68E-01 |
| rs4526799 | Brain_Putamen_basal_ganglia | 12 | IL23A          | 56733428 | rs4326839  | 0.9956 | 57280374 | G | C | 0.36 | 3.58E-03 | 1.97E-02 | 1.50E-01 |
| rs4526799 | Brain_Putamen_basal_ganglia | 12 | NAB2           | 57485933 | rs4326839  | 0.9956 | 57280374 | G | C | 0.36 | 3.58E-03 | 7.23E-03 | 1.31E-01 |
| rs4526799 | Brain_Putamen_basal_ganglia | 12 | INHBE          | 57849584 | rs4326839  | 0.9956 | 57280374 | G | C | 0.36 | 3.58E-03 | 3.79E-02 | 1.70E-01 |
| rs4526799 | Brain_Putamen_basal_ganglia | 12 | AVIL           | 58201929 | rs4326839  | 0.9956 | 57280374 | G | C | 0.36 | 3.58E-03 | 2.01E-02 | 1.51E-01 |
| rs4526799 | Brain_Putamen_basal_ganglia | 12 | WIBG           | 56310770 | rs4526799  | 1.0000 | 57280586 | T | C | 0.34 | 7.26E-06 | 3.45E-02 | 6.93E-02 |
| rs4526799 | Brain_Putamen_basal_ganglia | 12 | CDK2           | 56363560 | rs4526799  | 1.0000 | 57280586 | T | C | 0.34 | 7.26E-06 | 1.90E-02 | 5.03E-02 |
| rs4526799 | Brain_Putamen_basal_ganglia | 12 | RPS26          | 56436876 | rs4526799  | 1.0000 | 57280586 | T | C | 0.34 | 7.26E-06 | 1.38E-02 | 4.30E-02 |
| rs4526799 | Brain_Putamen_basal_ganglia | 12 | MYL6B          | 56548905 | rs4526799  | 1.0000 | 57280586 | T | C | 0.34 | 7.26E-06 | 1.59E-02 | 4.60E-02 |
| rs4526799 | Brain_Putamen_basal_ganglia | 12 | NABP2          | 56619718 | rs4526799  | 1.0000 | 57280586 | T | C | 0.34 | 7.26E-06 | 3.66E-02 | 7.16E-02 |
| rs4526799 | Brain_Putamen_basal_ganglia | 12 | CS             | 56679829 | rs4526799  | 1.0000 | 57280586 | T | C | 0.34 | 7.26E-06 | 3.12E-02 | 6.55E-02 |
| rs4526799 | Brain_Putamen_basal_ganglia | 12 | RP11-977G19.11 | 56701259 | rs4526799  | 1.0000 | 57280586 | T | C | 0.34 | 7.26E-06 | 3.55E-02 | 7.04E-02 |
| rs4526799 | Brain_Putamen_basal_ganglia | 12 | IL23A          | 56733428 | rs4526799  | 1.0000 | 57280586 | T | C | 0.34 | 7.26E-06 | 1.97E-02 | 5.13E-02 |
| rs4526799 | Brain_Putamen_basal_ganglia | 12 | NAB2           | 57485933 | rs4526799  | 1.0000 | 57280586 | T | C | 0.34 | 7.26E-06 | 7.23E-03 | 3.22E-02 |
| rs4526799 | Brain_Putamen_basal_ganglia | 12 | INHBE          | 57849584 | rs4526799  | 1.0000 | 57280586 | T | C | 0.34 | 7.26E-06 | 3.79E-02 | 7.31E-02 |
| rs4526799 | Brain_Putamen_basal_ganglia | 12 | AVIL           | 58201929 | rs4526799  | 1.0000 | 57280586 | T | C | 0.34 | 7.26E-06 | 2.01E-02 | 5.18E-02 |
| rs4526799 | Brain_Putamen_basal_ganglia | 12 | WIBG           | 56310770 | rs28876529 | 0.9956 | 57285301 | T | A | 0.36 | 2.25E-03 | 3.45E-02 | 1.52E-01 |
| rs4526799 | Brain_Putamen_basal_ganglia | 12 | CDK2           | 56363560 | rs28876529 | 0.9956 | 57285301 | T | A | 0.36 | 2.25E-03 | 1.90E-02 | 1.34E-01 |
| rs4526799 | Brain_Putamen_basal_ganglia | 12 | RPS26          | 56436876 | rs28876529 | 0.9956 | 57285301 | T | A | 0.36 | 2.25E-03 | 1.38E-02 | 1.26E-01 |
| rs4526799 | Brain_Putamen_basal_ganglia | 12 | MYL6B          | 56548905 | rs28876529 | 0.9956 | 57285301 | T | A | 0.36 | 2.25E-03 | 1.59E-02 | 1.29E-01 |
| rs4526799 | Brain_Putamen_basal_ganglia | 12 | NABP2          | 56619718 | rs28876529 | 0.9956 | 57285301 | T | A | 0.36 | 2.25E-03 | 3.66E-02 | 1.54E-01 |
| rs4526799 | Brain_Putamen_basal_ganglia | 12 | CS             | 56679829 | rs28876529 | 0.9956 | 57285301 | T | A | 0.36 | 2.25E-03 | 3.12E-02 | 1.48E-01 |
| rs4526799 | Brain_Putamen_basal_ganglia | 12 | RP11-977G19.11 | 56701259 | rs28876529 | 0.9956 | 57285301 | T | A | 0.36 | 2.25E-03 | 3.55E-02 | 1.53E-01 |
| rs4526799 | Brain_Putamen_basal_ganglia | 12 | IL23A          | 56733428 | rs28876529 | 0.9956 | 57285301 | T | A | 0.36 | 2.25E-03 | 1.97E-02 | 1.35E-01 |
| rs4526799 | Brain_Putamen_basal_ganglia | 12 | NAB2           | 57485933 | rs28876529 | 0.9956 | 57285301 | T | A | 0.36 | 2.25E-03 | 7.23E-03 | 1.15E-01 |
| rs4526799 | Brain_Putamen_basal_ganglia | 12 | INHBE          | 57849584 | rs28876529 | 0.9956 | 57285301 | T | A | 0.36 | 2.25E-03 | 3.79E-02 | 1.55E-01 |
| rs4526799 | Brain_Putamen_basal_ganglia | 12 | AVIL           | 58201929 | rs28876529 | 0.9956 | 57285301 | T | A | 0.36 | 2.25E-03 | 2.01E-02 | 1.35E-01 |
| rs4526799 | Brain_Putamen_basal_ganglia | 12 | WIBG           | 56310770 | rs11172037 | 0.9956 | 57285427 | T | A | 0.36 | 2.25E-03 | 3.45E-02 | 1.52E-01 |
| rs4526799 | Brain_Putamen_basal_ganglia | 12 | CDK2           | 56363560 | rs11172037 | 0.9956 | 57285427 | T | A | 0.36 | 2.25E-03 | 1.90E-02 | 1.34E-01 |
| rs4526799 | Brain_Putamen_basal_ganglia | 12 | RPS26          | 56436876 | rs11172037 | 0.9956 | 57285427 | T | A | 0.36 | 2.25E-03 | 1.38E-02 | 1.26E-01 |
| rs4526799 | Brain_Putamen_basal_ganglia | 12 | MYL6B          | 56548905 | rs11172037 | 0.9956 | 57285427 | T | A | 0.36 | 2.25E-03 | 1.59E-02 | 1.29E-01 |
| rs4526799 | Brain_Putamen_basal_ganglia | 12 | NABP2          | 56619718 | rs11172037 | 0.9956 | 57285427 | T | A | 0.36 | 2.25E-03 | 3.66E-02 | 1.54E-01 |
| rs4526799 | Brain_Putamen_basal_ganglia | 12 | CS             | 56679829 | rs11172037 | 0.9956 | 57285427 | T | A | 0.36 | 2.25E-03 | 3.12E-02 | 1.48E-01 |
| rs4526799 | Brain_Putamen_basal_ganglia | 12 | RP11-977G19.11 | 56701259 | rs11172037 | 0.9956 | 57285427 | T | A | 0.36 | 2.25E-03 | 3.55E-02 | 1.53E-01 |
| rs4526799 | Brain_Putamen_basal_ganglia | 12 | IL23A          | 56733428 | rs11172037 | 0.9956 | 57285427 | T | A | 0.36 | 2.25E-03 | 1.97E-02 | 1.35E-01 |
| rs4526799 | Brain_Putamen_basal_ganglia | 12 | NAB2           | 57485933 | rs11172037 | 0.9956 | 57285427 | T | A | 0.36 | 2.25E-03 | 7.23E-03 | 1.15E-01 |
| rs4526799 | Brain_Putamen_basal_ganglia | 12 | INHBE          | 57849584 | rs11172037 | 0.9956 | 57285427 | T | A | 0.36 | 2.25E-03 | 3.79E-02 | 1.55E-01 |

|           |                             |    |                |          |            |        |          |   |   |      |          |          |          |
|-----------|-----------------------------|----|----------------|----------|------------|--------|----------|---|---|------|----------|----------|----------|
| rs4526799 | Brain_Putamen_basal_ganglia | 12 | AVIL           | 58201929 | rs11172037 | 0.9956 | 57285427 | T | A | 0.36 | 2.25E-03 | 2.01E-02 | 1.35E-01 |
| rs4526799 | Brain_Putamen_basal_ganglia | 12 | WIBG           | 56310770 | rs12321987 | 0.9956 | 57288449 | G | A | 0.36 | 4.47E-03 | 3.45E-02 | 1.88E-01 |
| rs4526799 | Brain_Putamen_basal_ganglia | 12 | CDK2           | 56363560 | rs12321987 | 0.9956 | 57288449 | G | A | 0.36 | 4.47E-03 | 1.90E-02 | 1.71E-01 |
| rs4526799 | Brain_Putamen_basal_ganglia | 12 | RPS26          | 56436876 | rs12321987 | 0.9956 | 57288449 | G | A | 0.36 | 4.47E-03 | 1.38E-02 | 1.65E-01 |
| rs4526799 | Brain_Putamen_basal_ganglia | 12 | MYL6B          | 56548905 | rs12321987 | 0.9956 | 57288449 | G | A | 0.36 | 4.47E-03 | 1.59E-02 | 1.67E-01 |
| rs4526799 | Brain_Putamen_basal_ganglia | 12 | NABP2          | 56619718 | rs12321987 | 0.9956 | 57288449 | G | A | 0.36 | 4.47E-03 | 3.66E-02 | 1.90E-01 |
| rs4526799 | Brain_Putamen_basal_ganglia | 12 | CS             | 56679829 | rs12321987 | 0.9956 | 57288449 | G | A | 0.36 | 4.47E-03 | 3.12E-02 | 1.85E-01 |
| rs4526799 | Brain_Putamen_basal_ganglia | 12 | RP11-977G19.11 | 56701259 | rs12321987 | 0.9956 | 57288449 | G | A | 0.36 | 4.47E-03 | 3.55E-02 | 1.89E-01 |
| rs4526799 | Brain_Putamen_basal_ganglia | 12 | IL23A          | 56733428 | rs12321987 | 0.9956 | 57288449 | G | A | 0.36 | 4.47E-03 | 1.97E-02 | 1.72E-01 |
| rs4526799 | Brain_Putamen_basal_ganglia | 12 | NAB2           | 57485933 | rs12321987 | 0.9956 | 57288449 | G | A | 0.36 | 4.47E-03 | 7.23E-03 | 1.54E-01 |
| rs4526799 | Brain_Putamen_basal_ganglia | 12 | INHBE          | 57849584 | rs12321987 | 0.9956 | 57288449 | G | A | 0.36 | 4.47E-03 | 3.79E-02 | 1.91E-01 |
| rs4526799 | Brain_Putamen_basal_ganglia | 12 | AVIL           | 58201929 | rs12321987 | 0.9956 | 57288449 | G | A | 0.36 | 4.47E-03 | 2.01E-02 | 1.73E-01 |
| rs4526799 | Brain_Putamen_basal_ganglia | 12 | WIBG           | 56310770 | rs11172043 | 0.9869 | 57293182 | G | A | 0.35 | 4.58E-03 | 3.17E-02 | 1.84E-01 |
| rs4526799 | Brain_Putamen_basal_ganglia | 12 | CDK2           | 56363560 | rs11172043 | 0.9869 | 57293182 | G | A | 0.35 | 4.58E-03 | 3.47E-02 | 1.87E-01 |
| rs4526799 | Brain_Putamen_basal_ganglia | 12 | RPS26          | 56436876 | rs11172043 | 0.9869 | 57293182 | G | A | 0.35 | 4.58E-03 | 1.68E-02 | 1.67E-01 |
| rs4526799 | Brain_Putamen_basal_ganglia | 12 | MYL6B          | 56548905 | rs11172043 | 0.9869 | 57293182 | G | A | 0.35 | 4.58E-03 | 1.32E-02 | 1.62E-01 |
| rs4526799 | Brain_Putamen_basal_ganglia | 12 | NABP2          | 56619718 | rs11172043 | 0.9869 | 57293182 | G | A | 0.35 | 4.58E-03 | 1.34E-02 | 1.63E-01 |
| rs4526799 | Brain_Putamen_basal_ganglia | 12 | RP11-977G19.14 | 56662806 | rs11172043 | 0.9869 | 57293182 | G | A | 0.35 | 4.58E-03 | 1.76E-02 | 1.68E-01 |
| rs4526799 | Brain_Putamen_basal_ganglia | 12 | CS             | 56679829 | rs11172043 | 0.9869 | 57293182 | G | A | 0.35 | 4.58E-03 | 3.19E-02 | 1.84E-01 |
| rs4526799 | Brain_Putamen_basal_ganglia | 12 | IL23A          | 56733428 | rs11172043 | 0.9869 | 57293182 | G | A | 0.35 | 4.58E-03 | 8.96E-03 | 1.55E-01 |
| rs4526799 | Brain_Putamen_basal_ganglia | 12 | NAB2           | 57485933 | rs11172043 | 0.9869 | 57293182 | G | A | 0.35 | 4.58E-03 | 1.42E-02 | 1.64E-01 |
| rs4526799 | Brain_Putamen_basal_ganglia | 12 | INHBE          | 57849584 | rs11172043 | 0.9869 | 57293182 | G | A | 0.35 | 4.58E-03 | 4.04E-02 | 1.92E-01 |
| rs4526799 | Brain_Putamen_basal_ganglia | 12 | AVIL           | 58201929 | rs11172043 | 0.9869 | 57293182 | G | A | 0.35 | 4.58E-03 | 1.92E-02 | 1.70E-01 |
| rs4526799 | Brain_Putamen_basal_ganglia | 12 | WIBG           | 56310770 | rs12426816 | 0.9869 | 57294074 | A | C | 0.35 | 4.50E-03 | 3.17E-02 | 1.83E-01 |
| rs4526799 | Brain_Putamen_basal_ganglia | 12 | CDK2           | 56363560 | rs12426816 | 0.9869 | 57294074 | A | C | 0.35 | 4.50E-03 | 3.47E-02 | 1.86E-01 |
| rs4526799 | Brain_Putamen_basal_ganglia | 12 | RPS26          | 56436876 | rs12426816 | 0.9869 | 57294074 | A | C | 0.35 | 4.50E-03 | 1.68E-02 | 1.67E-01 |
| rs4526799 | Brain_Putamen_basal_ganglia | 12 | MYL6B          | 56548905 | rs12426816 | 0.9869 | 57294074 | A | C | 0.35 | 4.50E-03 | 1.32E-02 | 1.62E-01 |
| rs4526799 | Brain_Putamen_basal_ganglia | 12 | NABP2          | 56619718 | rs12426816 | 0.9869 | 57294074 | A | C | 0.35 | 4.50E-03 | 1.34E-02 | 1.62E-01 |
| rs4526799 | Brain_Putamen_basal_ganglia | 12 | RP11-977G19.14 | 56662806 | rs12426816 | 0.9869 | 57294074 | A | C | 0.35 | 4.50E-03 | 1.76E-02 | 1.68E-01 |
| rs4526799 | Brain_Putamen_basal_ganglia | 12 | CS             | 56679829 | rs12426816 | 0.9869 | 57294074 | A | C | 0.35 | 4.50E-03 | 3.19E-02 | 1.84E-01 |
| rs4526799 | Brain_Putamen_basal_ganglia | 12 | IL23A          | 56733428 | rs12426816 | 0.9869 | 57294074 | A | C | 0.35 | 4.50E-03 | 8.96E-03 | 1.55E-01 |
| rs4526799 | Brain_Putamen_basal_ganglia | 12 | NAB2           | 57485933 | rs12426816 | 0.9869 | 57294074 | A | C | 0.35 | 4.50E-03 | 1.42E-02 | 1.63E-01 |
| rs4526799 | Brain_Putamen_basal_ganglia | 12 | INHBE          | 57849584 | rs12426816 | 0.9869 | 57294074 | A | C | 0.35 | 4.50E-03 | 4.04E-02 | 1.92E-01 |
| rs4526799 | Brain_Putamen_basal_ganglia | 12 | AVIL           | 58201929 | rs12426816 | 0.9869 | 57294074 | A | C | 0.35 | 4.50E-03 | 1.92E-02 | 1.70E-01 |
| rs4526799 | Brain_Putamen_basal_ganglia | 12 | WIBG           | 56310770 | rs11172047 | 0.9869 | 57298080 | T | C | 0.35 | 6.51E-03 | 3.17E-02 | 1.97E-01 |
| rs4526799 | Brain_Putamen_basal_ganglia | 12 | CDK2           | 56363560 | rs11172047 | 0.9869 | 57298080 | T | C | 0.35 | 6.51E-03 | 3.47E-02 | 2.00E-01 |
| rs4526799 | Brain_Putamen_basal_ganglia | 12 | RPS26          | 56436876 | rs11172047 | 0.9869 | 57298080 | T | C | 0.35 | 6.51E-03 | 1.68E-02 | 1.82E-01 |
| rs4526799 | Brain_Putamen_basal_ganglia | 12 | MYL6B          | 56548905 | rs11172047 | 0.9869 | 57298080 | T | C | 0.35 | 6.51E-03 | 1.32E-02 | 1.77E-01 |
| rs4526799 | Brain_Putamen_basal_ganglia | 12 | NABP2          | 56619718 | rs11172047 | 0.9869 | 57298080 | T | C | 0.35 | 6.51E-03 | 1.34E-02 | 1.77E-01 |
| rs4526799 | Brain_Putamen_basal_ganglia | 12 | RP11-977G19.14 | 56662806 | rs11172047 | 0.9869 | 57298080 | T | C | 0.35 | 6.51E-03 | 1.76E-02 | 1.82E-01 |

|           |                             |    |                |          |            |        |          |   |   |      |          |          |          |
|-----------|-----------------------------|----|----------------|----------|------------|--------|----------|---|---|------|----------|----------|----------|
| rs4526799 | Brain_Putamen_basal_ganglia | 12 | CS             | 56679829 | rs11172047 | 0.9869 | 57298080 | T | C | 0.35 | 6.51E-03 | 3.19E-02 | 1.98E-01 |
| rs4526799 | Brain_Putamen_basal_ganglia | 12 | IL23A          | 56733428 | rs11172047 | 0.9869 | 57298080 | T | C | 0.35 | 6.51E-03 | 8.96E-03 | 1.70E-01 |
| rs4526799 | Brain_Putamen_basal_ganglia | 12 | NAB2           | 57485933 | rs11172047 | 0.9869 | 57298080 | T | C | 0.35 | 6.51E-03 | 1.42E-02 | 1.78E-01 |
| rs4526799 | Brain_Putamen_basal_ganglia | 12 | INHBE          | 57849584 | rs11172047 | 0.9869 | 57298080 | T | C | 0.35 | 6.51E-03 | 4.04E-02 | 2.05E-01 |
| rs4526799 | Brain_Putamen_basal_ganglia | 12 | AVIL           | 58201929 | rs11172047 | 0.9869 | 57298080 | T | C | 0.35 | 6.51E-03 | 1.92E-02 | 1.84E-01 |
| rs4526799 | Brain_Putamen_basal_ganglia | 12 | WIBG           | 56310770 | rs2371631  | 0.9869 | 57298614 | T | A | 0.35 | 6.32E-03 | 3.17E-02 | 1.94E-01 |
| rs4526799 | Brain_Putamen_basal_ganglia | 12 | CDK2           | 56363560 | rs2371631  | 0.9869 | 57298614 | T | A | 0.35 | 6.32E-03 | 3.47E-02 | 1.97E-01 |
| rs4526799 | Brain_Putamen_basal_ganglia | 12 | RPS26          | 56436876 | rs2371631  | 0.9869 | 57298614 | T | A | 0.35 | 6.32E-03 | 1.68E-02 | 1.78E-01 |
| rs4526799 | Brain_Putamen_basal_ganglia | 12 | MYL6B          | 56548905 | rs2371631  | 0.9869 | 57298614 | T | A | 0.35 | 6.32E-03 | 1.32E-02 | 1.73E-01 |
| rs4526799 | Brain_Putamen_basal_ganglia | 12 | NABP2          | 56619718 | rs2371631  | 0.9869 | 57298614 | T | A | 0.35 | 6.32E-03 | 1.34E-02 | 1.74E-01 |
| rs4526799 | Brain_Putamen_basal_ganglia | 12 | RP11-977G19.14 | 56662806 | rs2371631  | 0.9869 | 57298614 | T | A | 0.35 | 6.32E-03 | 1.76E-02 | 1.79E-01 |
| rs4526799 | Brain_Putamen_basal_ganglia | 12 | CS             | 56679829 | rs2371631  | 0.9869 | 57298614 | T | A | 0.35 | 6.32E-03 | 3.19E-02 | 1.95E-01 |
| rs4526799 | Brain_Putamen_basal_ganglia | 12 | IL23A          | 56733428 | rs2371631  | 0.9869 | 57298614 | T | A | 0.35 | 6.32E-03 | 8.96E-03 | 1.67E-01 |
| rs4526799 | Brain_Putamen_basal_ganglia | 12 | NAB2           | 57485933 | rs2371631  | 0.9869 | 57298614 | T | A | 0.35 | 6.32E-03 | 1.42E-02 | 1.75E-01 |
| rs4526799 | Brain_Putamen_basal_ganglia | 12 | INHBE          | 57849584 | rs2371631  | 0.9869 | 57298614 | T | A | 0.35 | 6.32E-03 | 4.04E-02 | 2.02E-01 |
| rs4526799 | Brain_Putamen_basal_ganglia | 12 | AVIL           | 58201929 | rs2371631  | 0.9869 | 57298614 | T | A | 0.35 | 6.32E-03 | 1.92E-02 | 1.81E-01 |
| rs4526799 | Brain_Putamen_basal_ganglia | 12 | WIBG           | 56310770 | rs12305763 | 0.9869 | 57299263 | G | A | 0.35 | 6.82E-03 | 3.17E-02 | 1.99E-01 |
| rs4526799 | Brain_Putamen_basal_ganglia | 12 | CDK2           | 56363560 | rs12305763 | 0.9869 | 57299263 | G | A | 0.35 | 6.82E-03 | 3.47E-02 | 2.01E-01 |
| rs4526799 | Brain_Putamen_basal_ganglia | 12 | RPS26          | 56436876 | rs12305763 | 0.9869 | 57299263 | G | A | 0.35 | 6.82E-03 | 1.68E-02 | 1.83E-01 |
| rs4526799 | Brain_Putamen_basal_ganglia | 12 | MYL6B          | 56548905 | rs12305763 | 0.9869 | 57299263 | G | A | 0.35 | 6.82E-03 | 1.32E-02 | 1.78E-01 |
| rs4526799 | Brain_Putamen_basal_ganglia | 12 | NABP2          | 56619718 | rs12305763 | 0.9869 | 57299263 | G | A | 0.35 | 6.82E-03 | 1.34E-02 | 1.78E-01 |
| rs4526799 | Brain_Putamen_basal_ganglia | 12 | RP11-977G19.14 | 56662806 | rs12305763 | 0.9869 | 57299263 | G | A | 0.35 | 6.82E-03 | 1.76E-02 | 1.84E-01 |
| rs4526799 | Brain_Putamen_basal_ganglia | 12 | CS             | 56679829 | rs12305763 | 0.9869 | 57299263 | G | A | 0.35 | 6.82E-03 | 3.19E-02 | 1.99E-01 |
| rs4526799 | Brain_Putamen_basal_ganglia | 12 | IL23A          | 56733428 | rs12305763 | 0.9869 | 57299263 | G | A | 0.35 | 6.82E-03 | 8.96E-03 | 1.72E-01 |
| rs4526799 | Brain_Putamen_basal_ganglia | 12 | NAB2           | 57485933 | rs12305763 | 0.9869 | 57299263 | G | A | 0.35 | 6.82E-03 | 1.42E-02 | 1.79E-01 |
| rs4526799 | Brain_Putamen_basal_ganglia | 12 | INHBE          | 57849584 | rs12305763 | 0.9869 | 57299263 | G | A | 0.35 | 6.82E-03 | 4.04E-02 | 2.06E-01 |
| rs4526799 | Brain_Putamen_basal_ganglia | 12 | AVIL           | 58201929 | rs12305763 | 0.9869 | 57299263 | G | A | 0.35 | 6.82E-03 | 1.92E-02 | 1.86E-01 |
| rs4526799 | Brain_Putamen_basal_ganglia | 12 | WIBG           | 56310770 | rs11172049 | 0.9128 | 57304203 | T | C | 0.35 | 1.15E-02 | 2.53E-02 | 1.93E-01 |
| rs4526799 | Brain_Putamen_basal_ganglia | 12 | RPS26          | 56436876 | rs11172049 | 0.9128 | 57304203 | T | C | 0.35 | 1.15E-02 | 3.68E-02 | 2.04E-01 |
| rs4526799 | Brain_Putamen_basal_ganglia | 12 | NABP2          | 56619718 | rs11172049 | 0.9128 | 57304203 | T | C | 0.35 | 1.15E-02 | 3.93E-02 | 2.06E-01 |
| rs4526799 | Brain_Putamen_basal_ganglia | 12 | RP11-977G19.14 | 56662806 | rs11172049 | 0.9128 | 57304203 | T | C | 0.35 | 1.15E-02 | 2.16E-02 | 1.89E-01 |
| rs4526799 | Brain_Putamen_basal_ganglia | 12 | IL23A          | 56733428 | rs11172049 | 0.9128 | 57304203 | T | C | 0.35 | 1.15E-02 | 4.21E-03 | 1.62E-01 |
| rs4526799 | Brain_Putamen_basal_ganglia | 12 | NAB2           | 57485933 | rs11172049 | 0.9128 | 57304203 | T | C | 0.35 | 1.15E-02 | 4.16E-02 | 2.08E-01 |
| rs4526799 | Brain_Putamen_basal_ganglia | 12 | INHBE          | 57849584 | rs11172049 | 0.9128 | 57304203 | T | C | 0.35 | 1.15E-02 | 3.82E-02 | 2.05E-01 |
| rs4526799 | Brain_Putamen_basal_ganglia | 12 | DTX3           | 58000996 | rs11172049 | 0.9128 | 57304203 | T | C | 0.35 | 1.15E-02 | 3.73E-02 | 2.04E-01 |
| rs4526799 | Brain_Putamen_basal_ganglia | 12 | AVIL           | 58201929 | rs11172049 | 0.9128 | 57304203 | T | C | 0.35 | 1.15E-02 | 2.68E-02 | 1.94E-01 |
| rs4526799 | Brain_Putamen_basal_ganglia | 12 | WIBG           | 56310770 | rs1874888  | 0.9085 | 57305138 | A | C | 0.35 | 1.15E-02 | 2.53E-02 | 1.93E-01 |
| rs4526799 | Brain_Putamen_basal_ganglia | 12 | RPS26          | 56436876 | rs1874888  | 0.9085 | 57305138 | A | C | 0.35 | 1.15E-02 | 3.68E-02 | 2.04E-01 |
| rs4526799 | Brain_Putamen_basal_ganglia | 12 | NABP2          | 56619718 | rs1874888  | 0.9085 | 57305138 | A | C | 0.35 | 1.15E-02 | 3.93E-02 | 2.06E-01 |
| rs4526799 | Brain_Putamen_basal_ganglia | 12 | RP11-977G19.14 | 56662806 | rs1874888  | 0.9085 | 57305138 | A | C | 0.35 | 1.15E-02 | 2.16E-02 | 1.89E-01 |

|           |                             |    |                |          |            |        |          |   |   |      |          |          |          |
|-----------|-----------------------------|----|----------------|----------|------------|--------|----------|---|---|------|----------|----------|----------|
| rs4526799 | Brain_Putamen_basal_ganglia | 12 | IL23A          | 56733428 | rs1874888  | 0.9085 | 57305138 | A | C | 0.35 | 1.15E-02 | 4.21E-03 | 1.62E-01 |
| rs4526799 | Brain_Putamen_basal_ganglia | 12 | NAB2           | 57485933 | rs1874888  | 0.9085 | 57305138 | A | C | 0.35 | 1.15E-02 | 4.16E-02 | 2.08E-01 |
| rs4526799 | Brain_Putamen_basal_ganglia | 12 | INHBE          | 57849584 | rs1874888  | 0.9085 | 57305138 | A | C | 0.35 | 1.15E-02 | 3.82E-02 | 2.05E-01 |
| rs4526799 | Brain_Putamen_basal_ganglia | 12 | DTX3           | 58000996 | rs1874888  | 0.9085 | 57305138 | A | C | 0.35 | 1.15E-02 | 3.73E-02 | 2.04E-01 |
| rs4526799 | Brain_Putamen_basal_ganglia | 12 | AVIL           | 58201929 | rs1874888  | 0.9085 | 57305138 | A | C | 0.35 | 1.15E-02 | 2.68E-02 | 1.94E-01 |
| rs4526799 | Brain_Putamen_basal_ganglia | 12 | WIBG           | 56310770 | rs10506349 | 0.9128 | 57306412 | T | C | 0.37 | 1.10E-02 | 3.00E-02 | 1.88E-01 |
| rs4526799 | Brain_Putamen_basal_ganglia | 12 | RP11-977G19.5  | 56570105 | rs10506349 | 0.9128 | 57306412 | T | C | 0.37 | 1.10E-02 | 4.95E-02 | 2.06E-01 |
| rs4526799 | Brain_Putamen_basal_ganglia | 12 | NABP2          | 56619718 | rs10506349 | 0.9128 | 57306412 | T | C | 0.37 | 1.10E-02 | 1.24E-02 | 1.68E-01 |
| rs4526799 | Brain_Putamen_basal_ganglia | 12 | RP11-977G19.14 | 56662806 | rs10506349 | 0.9128 | 57306412 | T | C | 0.37 | 1.10E-02 | 9.77E-03 | 1.63E-01 |
| rs4526799 | Brain_Putamen_basal_ganglia | 12 | RP11-977G19.11 | 56701259 | rs10506349 | 0.9128 | 57306412 | T | C | 0.37 | 1.10E-02 | 4.00E-02 | 1.97E-01 |
| rs4526799 | Brain_Putamen_basal_ganglia | 12 | IL23A          | 56733428 | rs10506349 | 0.9128 | 57306412 | T | C | 0.37 | 1.10E-02 | 6.50E-03 | 1.57E-01 |
| rs4526799 | Brain_Putamen_basal_ganglia | 12 | SDR9C7         | 57322563 | rs10506349 | 0.9128 | 57306412 | T | C | 0.37 | 1.10E-02 | 2.15E-02 | 1.79E-01 |
| rs4526799 | Brain_Putamen_basal_ganglia | 12 | INHBE          | 57849584 | rs10506349 | 0.9128 | 57306412 | T | C | 0.37 | 1.10E-02 | 2.56E-02 | 1.84E-01 |
| rs4526799 | Brain_Putamen_basal_ganglia | 12 | AVIL           | 58201929 | rs10506349 | 0.9128 | 57306412 | T | C | 0.37 | 1.10E-02 | 2.19E-02 | 1.80E-01 |
| rs4526799 | Brain_Putamen_basal_ganglia | 12 | WIBG           | 56310770 | rs10876951 | 0.9085 | 57306430 | T | G | 0.35 | 1.15E-02 | 2.53E-02 | 1.93E-01 |
| rs4526799 | Brain_Putamen_basal_ganglia | 12 | RPS26          | 56436876 | rs10876951 | 0.9085 | 57306430 | T | G | 0.35 | 1.15E-02 | 3.68E-02 | 2.04E-01 |
| rs4526799 | Brain_Putamen_basal_ganglia | 12 | NABP2          | 56619718 | rs10876951 | 0.9085 | 57306430 | T | G | 0.35 | 1.15E-02 | 3.93E-02 | 2.06E-01 |
| rs4526799 | Brain_Putamen_basal_ganglia | 12 | RP11-977G19.14 | 56662806 | rs10876951 | 0.9085 | 57306430 | T | G | 0.35 | 1.15E-02 | 2.16E-02 | 1.89E-01 |
| rs4526799 | Brain_Putamen_basal_ganglia | 12 | IL23A          | 56733428 | rs10876951 | 0.9085 | 57306430 | T | G | 0.35 | 1.15E-02 | 4.21E-03 | 1.62E-01 |
| rs4526799 | Brain_Putamen_basal_ganglia | 12 | NAB2           | 57485933 | rs10876951 | 0.9085 | 57306430 | T | G | 0.35 | 1.15E-02 | 4.16E-02 | 2.08E-01 |
| rs4526799 | Brain_Putamen_basal_ganglia | 12 | INHBE          | 57849584 | rs10876951 | 0.9085 | 57306430 | T | G | 0.35 | 1.15E-02 | 3.82E-02 | 2.05E-01 |
| rs4526799 | Brain_Putamen_basal_ganglia | 12 | DTX3           | 58000996 | rs10876951 | 0.9085 | 57306430 | T | G | 0.35 | 1.15E-02 | 3.73E-02 | 2.04E-01 |
| rs4526799 | Brain_Putamen_basal_ganglia | 12 | AVIL           | 58201929 | rs10876951 | 0.9085 | 57306430 | T | G | 0.35 | 1.15E-02 | 2.68E-02 | 1.94E-01 |
| rs4526799 | Brain_Putamen_basal_ganglia | 12 | WIBG           | 56310770 | rs10747774 | 0.9128 | 57307079 | T | C | 0.36 | 1.16E-02 | 3.71E-02 | 2.00E-01 |
| rs4526799 | Brain_Putamen_basal_ganglia | 12 | NABP2          | 56619718 | rs10747774 | 0.9128 | 57307079 | T | C | 0.36 | 1.16E-02 | 1.09E-02 | 1.71E-01 |
| rs4526799 | Brain_Putamen_basal_ganglia | 12 | RP11-977G19.14 | 56662806 | rs10747774 | 0.9128 | 57307079 | T | C | 0.36 | 1.16E-02 | 1.08E-02 | 1.70E-01 |
| rs4526799 | Brain_Putamen_basal_ganglia | 12 | RP11-977G19.11 | 56701259 | rs10747774 | 0.9128 | 57307079 | T | C | 0.36 | 1.16E-02 | 4.24E-02 | 2.05E-01 |
| rs4526799 | Brain_Putamen_basal_ganglia | 12 | IL23A          | 56733428 | rs10747774 | 0.9128 | 57307079 | T | C | 0.36 | 1.16E-02 | 7.44E-03 | 1.65E-01 |
| rs4526799 | Brain_Putamen_basal_ganglia | 12 | SDR9C7         | 57322563 | rs10747774 | 0.9128 | 57307079 | T | C | 0.36 | 1.16E-02 | 2.23E-02 | 1.85E-01 |
| rs4526799 | Brain_Putamen_basal_ganglia | 12 | INHBE          | 57849584 | rs10747774 | 0.9128 | 57307079 | T | C | 0.36 | 1.16E-02 | 2.48E-02 | 1.88E-01 |
| rs4526799 | Brain_Putamen_basal_ganglia | 12 | AVIL           | 58201929 | rs10747774 | 0.9128 | 57307079 | T | C | 0.36 | 1.16E-02 | 2.35E-02 | 1.87E-01 |
| rs4526799 | Brain_Putamen_basal_ganglia | 12 | WIBG           | 56310770 | rs10783812 | 0.9085 | 57308723 | C | T | 0.35 | 1.19E-02 | 2.24E-02 | 1.92E-01 |
| rs4526799 | Brain_Putamen_basal_ganglia | 12 | RPS26          | 56436876 | rs10783812 | 0.9085 | 57308723 | C | T | 0.35 | 1.19E-02 | 3.56E-02 | 2.05E-01 |
| rs4526799 | Brain_Putamen_basal_ganglia | 12 | NABP2          | 56619718 | rs10783812 | 0.9085 | 57308723 | C | T | 0.35 | 1.19E-02 | 4.26E-02 | 2.11E-01 |
| rs4526799 | Brain_Putamen_basal_ganglia | 12 | RP11-977G19.14 | 56662806 | rs10783812 | 0.9085 | 57308723 | C | T | 0.35 | 1.19E-02 | 2.03E-02 | 1.90E-01 |
| rs4526799 | Brain_Putamen_basal_ganglia | 12 | IL23A          | 56733428 | rs10783812 | 0.9085 | 57308723 | C | T | 0.35 | 1.19E-02 | 3.65E-03 | 1.64E-01 |
| rs4526799 | Brain_Putamen_basal_ganglia | 12 | NAB2           | 57485933 | rs10783812 | 0.9085 | 57308723 | C | T | 0.35 | 1.19E-02 | 4.52E-02 | 2.13E-01 |
| rs4526799 | Brain_Putamen_basal_ganglia | 12 | INHBE          | 57849584 | rs10783812 | 0.9085 | 57308723 | C | T | 0.35 | 1.19E-02 | 4.06E-02 | 2.10E-01 |
| rs4526799 | Brain_Putamen_basal_ganglia | 12 | DTX3           | 58000996 | rs10783812 | 0.9085 | 57308723 | C | T | 0.35 | 1.19E-02 | 3.61E-02 | 2.06E-01 |
| rs4526799 | Brain_Putamen_basal_ganglia | 12 | AVIL           | 58201929 | rs10783812 | 0.9085 | 57308723 | C | T | 0.35 | 1.19E-02 | 3.10E-02 | 2.01E-01 |

|           |                                |    |                |          |            |        |          |   |   |      |          |          |          |
|-----------|--------------------------------|----|----------------|----------|------------|--------|----------|---|---|------|----------|----------|----------|
| rs4526799 | Brain_Putamen_basal_ganglia    | 12 | WIBG           | 56310770 | rs11172056 | 0.9089 | 57308975 | C | T | 0.37 | 1.10E-02 | 3.71E-02 | 1.95E-01 |
| rs4526799 | Brain_Putamen_basal_ganglia    | 12 | NABP2          | 56619718 | rs11172056 | 0.9089 | 57308975 | C | T | 0.37 | 1.10E-02 | 1.09E-02 | 1.65E-01 |
| rs4526799 | Brain_Putamen_basal_ganglia    | 12 | RP11-977G19.14 | 56662806 | rs11172056 | 0.9089 | 57308975 | C | T | 0.37 | 1.10E-02 | 1.08E-02 | 1.65E-01 |
| rs4526799 | Brain_Putamen_basal_ganglia    | 12 | RP11-977G19.11 | 56701259 | rs11172056 | 0.9089 | 57308975 | C | T | 0.37 | 1.10E-02 | 4.24E-02 | 2.00E-01 |
| rs4526799 | Brain_Putamen_basal_ganglia    | 12 | IL23A          | 56733428 | rs11172056 | 0.9089 | 57308975 | C | T | 0.37 | 1.10E-02 | 7.44E-03 | 1.59E-01 |
| rs4526799 | Brain_Putamen_basal_ganglia    | 12 | SDR9C7         | 57322563 | rs11172056 | 0.9089 | 57308975 | C | T | 0.37 | 1.10E-02 | 2.23E-02 | 1.80E-01 |
| rs4526799 | Brain_Putamen_basal_ganglia    | 12 | INHBE          | 57849584 | rs11172056 | 0.9089 | 57308975 | C | T | 0.37 | 1.10E-02 | 2.48E-02 | 1.83E-01 |
| rs4526799 | Brain_Putamen_basal_ganglia    | 12 | AVIL           | 58201929 | rs11172056 | 0.9089 | 57308975 | C | T | 0.37 | 1.10E-02 | 2.35E-02 | 1.82E-01 |
| rs4526799 | Brain_Putamen_basal_ganglia    | 12 | NABP2          | 56619718 | rs7302420  | 0.9085 | 57309884 | G | C | 0.36 | 1.54E-02 | 1.15E-02 | 1.96E-01 |
| rs4526799 | Brain_Putamen_basal_ganglia    | 12 | RP11-977G19.14 | 56662806 | rs7302420  | 0.9085 | 57309884 | G | C | 0.36 | 1.54E-02 | 2.10E-02 | 2.07E-01 |
| rs4526799 | Brain_Putamen_basal_ganglia    | 12 | IL23A          | 56733428 | rs7302420  | 0.9085 | 57309884 | G | C | 0.36 | 1.54E-02 | 5.87E-03 | 1.86E-01 |
| rs4526799 | Brain_Putamen_basal_ganglia    | 12 | SDR9C7         | 57322563 | rs7302420  | 0.9085 | 57309884 | G | C | 0.36 | 1.54E-02 | 1.44E-02 | 1.99E-01 |
| rs4526799 | Brain_Putamen_basal_ganglia    | 12 | NAB2           | 57485933 | rs7302420  | 0.9085 | 57309884 | G | C | 0.36 | 1.54E-02 | 3.23E-02 | 2.18E-01 |
| rs4526799 | Brain_Putamen_basal_ganglia    | 12 | INHBE          | 57849584 | rs7302420  | 0.9085 | 57309884 | G | C | 0.36 | 1.54E-02 | 2.29E-02 | 2.09E-01 |
| rs4526799 | Brain_Putamen_basal_ganglia    | 12 | DTX3           | 58000996 | rs7302420  | 0.9085 | 57309884 | G | C | 0.36 | 1.54E-02 | 3.92E-02 | 2.24E-01 |
| rs4526799 | Brain_Putamen_basal_ganglia    | 12 | AVIL           | 58201929 | rs7302420  | 0.9085 | 57309884 | G | C | 0.36 | 1.54E-02 | 2.05E-02 | 2.07E-01 |
| rs4526799 | Brain_Putamen_basal_ganglia    | 12 | WIBG           | 56310770 | rs12228618 | 0.9128 | 57311229 | T | C | 0.37 | 1.29E-02 | 4.31E-02 | 2.09E-01 |
| rs4526799 | Brain_Putamen_basal_ganglia    | 12 | CDK2           | 56363560 | rs12228618 | 0.9128 | 57311229 | T | C | 0.37 | 1.29E-02 | 4.36E-02 | 2.09E-01 |
| rs4526799 | Brain_Putamen_basal_ganglia    | 12 | RPS26          | 56436876 | rs12228618 | 0.9128 | 57311229 | T | C | 0.37 | 1.29E-02 | 3.66E-02 | 2.03E-01 |
| rs4526799 | Brain_Putamen_basal_ganglia    | 12 | NABP2          | 56619718 | rs12228618 | 0.9128 | 57311229 | T | C | 0.37 | 1.29E-02 | 1.37E-02 | 1.78E-01 |
| rs4526799 | Brain_Putamen_basal_ganglia    | 12 | RP11-977G19.14 | 56662806 | rs12228618 | 0.9128 | 57311229 | T | C | 0.37 | 1.29E-02 | 2.20E-02 | 1.89E-01 |
| rs4526799 | Brain_Putamen_basal_ganglia    | 12 | RP11-977G19.11 | 56701259 | rs12228618 | 0.9128 | 57311229 | T | C | 0.37 | 1.29E-02 | 4.76E-02 | 2.12E-01 |
| rs4526799 | Brain_Putamen_basal_ganglia    | 12 | IL23A          | 56733428 | rs12228618 | 0.9128 | 57311229 | T | C | 0.37 | 1.29E-02 | 1.17E-02 | 1.76E-01 |
| rs4526799 | Brain_Putamen_basal_ganglia    | 12 | SDR9C7         | 57322563 | rs12228618 | 0.9128 | 57311229 | T | C | 0.37 | 1.29E-02 | 1.94E-02 | 1.86E-01 |
| rs4526799 | Brain_Putamen_basal_ganglia    | 12 | INHBE          | 57849584 | rs12228618 | 0.9128 | 57311229 | T | C | 0.37 | 1.29E-02 | 3.82E-02 | 2.04E-01 |
| rs4526799 | Brain_Putamen_basal_ganglia    | 12 | AVIL           | 58201929 | rs12228618 | 0.9128 | 57311229 | T | C | 0.37 | 1.29E-02 | 3.12E-02 | 1.98E-01 |
| rs4526799 | Brain_Putamen_basal_ganglia    | 12 | RPS26          | 56436876 | rs9739473  | 0.9012 | 57313335 | A | T | 0.37 | 2.65E-02 | 4.26E-02 | 2.73E-01 |
| rs4526799 | Brain_Putamen_basal_ganglia    | 12 | NABP2          | 56619718 | rs9739473  | 0.9012 | 57313335 | A | T | 0.37 | 2.65E-02 | 9.50E-03 | 2.44E-01 |
| rs4526799 | Brain_Putamen_basal_ganglia    | 12 | RP11-977G19.14 | 56662806 | rs9739473  | 0.9012 | 57313335 | A | T | 0.37 | 2.65E-02 | 2.73E-02 | 2.62E-01 |
| rs4526799 | Brain_Putamen_basal_ganglia    | 12 | RP11-977G19.11 | 56701259 | rs9739473  | 0.9012 | 57313335 | A | T | 0.37 | 2.65E-02 | 4.05E-02 | 2.72E-01 |
| rs4526799 | Brain_Putamen_basal_ganglia    | 12 | IL23A          | 56733428 | rs9739473  | 0.9012 | 57313335 | A | T | 0.37 | 2.65E-02 | 1.26E-02 | 2.48E-01 |
| rs4526799 | Brain_Putamen_basal_ganglia    | 12 | SDR9C7         | 57322563 | rs9739473  | 0.9012 | 57313335 | A | T | 0.37 | 2.65E-02 | 3.24E-02 | 2.66E-01 |
| rs4526799 | Brain_Putamen_basal_ganglia    | 12 | NAB2           | 57485933 | rs9739473  | 0.9012 | 57313335 | A | T | 0.37 | 2.65E-02 | 3.96E-02 | 2.71E-01 |
| rs4526799 | Brain_Putamen_basal_ganglia    | 12 | INHBE          | 57849584 | rs9739473  | 0.9012 | 57313335 | A | T | 0.37 | 2.65E-02 | 2.51E-02 | 2.60E-01 |
| rs4526799 | Brain_Putamen_basal_ganglia    | 12 | AVIL           | 58201929 | rs9739473  | 0.9012 | 57313335 | A | T | 0.37 | 2.65E-02 | 2.72E-02 | 2.62E-01 |
| rs4526799 | Brain_Spinal_cord_cervical_c-1 | 12 | RNF41          | 56607001 | rs9919772  | 0.8450 | 57260027 | T | C | 0.33 | 1.03E-02 | 3.70E-02 | 2.25E-01 |
| rs4526799 | Brain_Spinal_cord_cervical_c-1 | 12 | STAC3          | 57641106 | rs9919772  | 0.8450 | 57260027 | T | C | 0.33 | 1.03E-02 | 3.86E-02 | 2.27E-01 |
| rs4526799 | Brain_Spinal_cord_cervical_c-1 | 12 | CYP27B1        | 58158578 | rs9919772  | 0.8450 | 57260027 | T | C | 0.33 | 1.03E-02 | 2.70E-02 | 2.17E-01 |
| rs4526799 | Brain_Spinal_cord_cervical_c-1 | 12 | RAB5B          | 56378093 | rs4495925  | 0.8650 | 57268116 | C | G | 0.33 | 1.04E-02 | 4.10E-02 | 2.26E-01 |
| rs4526799 | Brain_Spinal_cord_cervical_c-1 | 12 | RNF41          | 56607001 | rs4495925  | 0.8650 | 57268116 | C | G | 0.33 | 1.04E-02 | 4.41E-02 | 2.28E-01 |

|           |                                |    |         |          |            |        |          |   |   |      |          |          |          |
|-----------|--------------------------------|----|---------|----------|------------|--------|----------|---|---|------|----------|----------|----------|
| rs4526799 | Brain_Spinal_cord_cervical_c-1 | 12 | CYP27B1 | 58158578 | rs4495925  | 0.8650 | 57268116 | C | G | 0.33 | 1.04E-02 | 2.55E-02 | 2.12E-01 |
| rs4526799 | Brain_Spinal_cord_cervical_c-1 | 12 | RAB5B   | 56378093 | rs4471472  | 0.8650 | 57268985 | A | G | 0.32 | 9.99E-03 | 4.29E-02 | 2.24E-01 |
| rs4526799 | Brain_Spinal_cord_cervical_c-1 | 12 | RNF41   | 56607001 | rs4471472  | 0.8650 | 57268985 | A | G | 0.32 | 9.99E-03 | 3.97E-02 | 2.21E-01 |
| rs4526799 | Brain_Spinal_cord_cervical_c-1 | 12 | CYP27B1 | 58158578 | rs4471472  | 0.8650 | 57268985 | A | G | 0.32 | 9.99E-03 | 2.05E-02 | 2.03E-01 |
| rs4526799 | Brain_Spinal_cord_cervical_c-1 | 12 | RAB5B   | 56378093 | rs4633499  | 0.8610 | 57269264 | A | T | 0.32 | 1.43E-02 | 3.97E-02 | 2.55E-01 |
| rs4526799 | Brain_Spinal_cord_cervical_c-1 | 12 | STAC3   | 57641106 | rs4633499  | 0.8610 | 57269264 | A | T | 0.32 | 1.43E-02 | 4.24E-02 | 2.57E-01 |
| rs4526799 | Brain_Spinal_cord_cervical_c-1 | 12 | CYP27B1 | 58158578 | rs4633499  | 0.8610 | 57269264 | A | T | 0.32 | 1.43E-02 | 2.86E-02 | 2.46E-01 |
| rs4526799 | Brain_Spinal_cord_cervical_c-1 | 12 | ESYT1   | 56530147 | rs12300079 | 0.9956 | 57273194 | T | C | 0.36 | 3.73E-03 | 4.85E-02 | 1.82E-01 |
| rs4526799 | Brain_Spinal_cord_cervical_c-1 | 12 | TAC3    | 57413225 | rs12300079 | 0.9956 | 57273194 | T | C | 0.36 | 3.73E-03 | 3.04E-02 | 1.65E-01 |
| rs4526799 | Brain_Spinal_cord_cervical_c-1 | 12 | ESYT1   | 56530147 | rs12300191 | 0.9956 | 57273289 | A | G | 0.36 | 3.59E-03 | 4.85E-02 | 1.80E-01 |
| rs4526799 | Brain_Spinal_cord_cervical_c-1 | 12 | TAC3    | 57413225 | rs12300191 | 0.9956 | 57273289 | A | G | 0.36 | 3.59E-03 | 3.04E-02 | 1.63E-01 |
| rs4526799 | Brain_Spinal_cord_cervical_c-1 | 12 | ESYT1   | 56530147 | rs4514464  | 0.9956 | 57276375 | C | T | 0.36 | 2.92E-03 | 4.85E-02 | 1.77E-01 |
| rs4526799 | Brain_Spinal_cord_cervical_c-1 | 12 | TAC3    | 57413225 | rs4514464  | 0.9956 | 57276375 | C | T | 0.36 | 2.92E-03 | 3.04E-02 | 1.60E-01 |
| rs4526799 | Brain_Spinal_cord_cervical_c-1 | 12 | ESYT1   | 56530147 | rs4417325  | 0.9956 | 57277302 | G | A | 0.36 | 3.59E-03 | 4.85E-02 | 1.80E-01 |
| rs4526799 | Brain_Spinal_cord_cervical_c-1 | 12 | TAC3    | 57413225 | rs4417325  | 0.9956 | 57277302 | G | A | 0.36 | 3.59E-03 | 3.04E-02 | 1.63E-01 |
| rs4526799 | Brain_Spinal_cord_cervical_c-1 | 12 | ESYT1   | 56530147 | rs11172030 | 0.9956 | 57278076 | A | C | 0.36 | 3.63E-03 | 4.85E-02 | 1.81E-01 |
| rs4526799 | Brain_Spinal_cord_cervical_c-1 | 12 | TAC3    | 57413225 | rs11172030 | 0.9956 | 57278076 | A | C | 0.36 | 3.63E-03 | 3.04E-02 | 1.63E-01 |
| rs4526799 | Brain_Spinal_cord_cervical_c-1 | 12 | ESYT1   | 56530147 | rs10876944 | 0.9956 | 57279372 | T | A | 0.36 | 3.63E-03 | 4.85E-02 | 1.81E-01 |
| rs4526799 | Brain_Spinal_cord_cervical_c-1 | 12 | TAC3    | 57413225 | rs10876944 | 0.9956 | 57279372 | T | A | 0.36 | 3.63E-03 | 3.04E-02 | 1.63E-01 |
| rs4526799 | Brain_Spinal_cord_cervical_c-1 | 12 | ESYT1   | 56530147 | rs4326839  | 0.9956 | 57280374 | G | C | 0.36 | 3.58E-03 | 4.85E-02 | 1.80E-01 |
| rs4526799 | Brain_Spinal_cord_cervical_c-1 | 12 | TAC3    | 57413225 | rs4326839  | 0.9956 | 57280374 | G | C | 0.36 | 3.58E-03 | 3.04E-02 | 1.63E-01 |
| rs4526799 | Brain_Spinal_cord_cervical_c-1 | 12 | ESYT1   | 56530147 | rs4526799  | 1.0000 | 57280586 | T | C | 0.34 | 7.26E-06 | 4.85E-02 | 8.46E-02 |
| rs4526799 | Brain_Spinal_cord_cervical_c-1 | 12 | TAC3    | 57413225 | rs4526799  | 1.0000 | 57280586 | T | C | 0.34 | 7.26E-06 | 3.04E-02 | 6.46E-02 |
| rs4526799 | Brain_Spinal_cord_cervical_c-1 | 12 | ESYT1   | 56530147 | rs28876529 | 0.9956 | 57285301 | T | A | 0.36 | 2.25E-03 | 4.85E-02 | 1.65E-01 |
| rs4526799 | Brain_Spinal_cord_cervical_c-1 | 12 | TAC3    | 57413225 | rs28876529 | 0.9956 | 57285301 | T | A | 0.36 | 2.25E-03 | 3.04E-02 | 1.47E-01 |
| rs4526799 | Brain_Spinal_cord_cervical_c-1 | 12 | ESYT1   | 56530147 | rs11172037 | 0.9956 | 57285427 | T | A | 0.36 | 2.25E-03 | 4.85E-02 | 1.65E-01 |
| rs4526799 | Brain_Spinal_cord_cervical_c-1 | 12 | TAC3    | 57413225 | rs11172037 | 0.9956 | 57285427 | T | A | 0.36 | 2.25E-03 | 3.04E-02 | 1.47E-01 |
| rs4526799 | Brain_Spinal_cord_cervical_c-1 | 12 | ESYT1   | 56530147 | rs12321987 | 0.9956 | 57288449 | G | A | 0.36 | 4.47E-03 | 4.85E-02 | 2.00E-01 |
| rs4526799 | Brain_Spinal_cord_cervical_c-1 | 12 | TAC3    | 57413225 | rs12321987 | 0.9956 | 57288449 | G | A | 0.36 | 4.47E-03 | 3.04E-02 | 1.84E-01 |
| rs4526799 | Brain_Spinal_cord_cervical_c-1 | 12 | NABP2   | 56619718 | rs11172043 | 0.9869 | 57293182 | G | A | 0.35 | 4.58E-03 | 3.76E-02 | 1.89E-01 |
| rs4526799 | Brain_Spinal_cord_cervical_c-1 | 12 | TAC3    | 57413225 | rs11172043 | 0.9869 | 57293182 | G | A | 0.35 | 4.58E-03 | 1.90E-02 | 1.70E-01 |
| rs4526799 | Brain_Spinal_cord_cervical_c-1 | 12 | NABP2   | 56619718 | rs12426816 | 0.9869 | 57294074 | A | C | 0.35 | 4.50E-03 | 3.76E-02 | 1.89E-01 |
| rs4526799 | Brain_Spinal_cord_cervical_c-1 | 12 | TAC3    | 57413225 | rs12426816 | 0.9869 | 57294074 | A | C | 0.35 | 4.50E-03 | 1.90E-02 | 1.70E-01 |
| rs4526799 | Brain_Spinal_cord_cervical_c-1 | 12 | NABP2   | 56619718 | rs11172047 | 0.9869 | 57298080 | T | C | 0.35 | 6.51E-03 | 3.76E-02 | 2.03E-01 |
| rs4526799 | Brain_Spinal_cord_cervical_c-1 | 12 | TAC3    | 57413225 | rs11172047 | 0.9869 | 57298080 | T | C | 0.35 | 6.51E-03 | 1.90E-02 | 1.84E-01 |
| rs4526799 | Brain_Spinal_cord_cervical_c-1 | 12 | NABP2   | 56619718 | rs2371631  | 0.9869 | 57298614 | T | A | 0.35 | 6.32E-03 | 3.76E-02 | 2.00E-01 |
| rs4526799 | Brain_Spinal_cord_cervical_c-1 | 12 | TAC3    | 57413225 | rs2371631  | 0.9869 | 57298614 | T | A | 0.35 | 6.32E-03 | 1.90E-02 | 1.81E-01 |
| rs4526799 | Brain_Spinal_cord_cervical_c-1 | 12 | NABP2   | 56619718 | rs12305763 | 0.9869 | 57299263 | G | A | 0.35 | 6.82E-03 | 3.76E-02 | 2.04E-01 |
| rs4526799 | Brain_Spinal_cord_cervical_c-1 | 12 | TAC3    | 57413225 | rs12305763 | 0.9869 | 57299263 | G | A | 0.35 | 6.82E-03 | 1.90E-02 | 1.85E-01 |
| rs4526799 | Brain_Spinal_cord_cervical_c-1 | 12 | RAB5B   | 56378093 | rs11172049 | 0.9128 | 57304203 | T | C | 0.35 | 1.15E-02 | 3.24E-02 | 1.99E-01 |

|           |                                |    |               |          |            |        |          |   |   |      |          |          |          |
|-----------|--------------------------------|----|---------------|----------|------------|--------|----------|---|---|------|----------|----------|----------|
| rs4526799 | Brain_Spinal_cord_cervical_c-1 | 12 | TAC3          | 57413225 | rs11172049 | 0.9128 | 57304203 | T | C | 0.35 | 1.15E-02 | 3.25E-03 | 1.59E-01 |
| rs4526799 | Brain_Spinal_cord_cervical_c-1 | 12 | STAC3         | 57641106 | rs11172049 | 0.9128 | 57304203 | T | C | 0.35 | 1.15E-02 | 3.15E-02 | 1.99E-01 |
| rs4526799 | Brain_Spinal_cord_cervical_c-1 | 12 | CYP27B1       | 58158578 | rs11172049 | 0.9128 | 57304203 | T | C | 0.35 | 1.15E-02 | 3.41E-02 | 2.01E-01 |
| rs4526799 | Brain_Spinal_cord_cervical_c-1 | 12 | RAB5B         | 56378093 | rs1874888  | 0.9085 | 57305138 | A | C | 0.35 | 1.15E-02 | 3.24E-02 | 1.99E-01 |
| rs4526799 | Brain_Spinal_cord_cervical_c-1 | 12 | TAC3          | 57413225 | rs1874888  | 0.9085 | 57305138 | A | C | 0.35 | 1.15E-02 | 3.25E-03 | 1.59E-01 |
| rs4526799 | Brain_Spinal_cord_cervical_c-1 | 12 | STAC3         | 57641106 | rs1874888  | 0.9085 | 57305138 | A | C | 0.35 | 1.15E-02 | 3.15E-02 | 1.99E-01 |
| rs4526799 | Brain_Spinal_cord_cervical_c-1 | 12 | CYP27B1       | 58158578 | rs1874888  | 0.9085 | 57305138 | A | C | 0.35 | 1.15E-02 | 3.41E-02 | 2.01E-01 |
| rs4526799 | Brain_Spinal_cord_cervical_c-1 | 12 | RAB5B         | 56378093 | rs10506349 | 0.9128 | 57306412 | T | C | 0.37 | 1.10E-02 | 2.50E-02 | 1.83E-01 |
| rs4526799 | Brain_Spinal_cord_cervical_c-1 | 12 | TAC3          | 57413225 | rs10506349 | 0.9128 | 57306412 | T | C | 0.37 | 1.10E-02 | 5.05E-03 | 1.54E-01 |
| rs4526799 | Brain_Spinal_cord_cervical_c-1 | 12 | STAC3         | 57641106 | rs10506349 | 0.9128 | 57306412 | T | C | 0.37 | 1.10E-02 | 3.33E-02 | 1.91E-01 |
| rs4526799 | Brain_Spinal_cord_cervical_c-1 | 12 | RAB5B         | 56378093 | rs10876951 | 0.9085 | 57306430 | T | G | 0.35 | 1.15E-02 | 3.24E-02 | 1.99E-01 |
| rs4526799 | Brain_Spinal_cord_cervical_c-1 | 12 | TAC3          | 57413225 | rs10876951 | 0.9085 | 57306430 | T | G | 0.35 | 1.15E-02 | 3.25E-03 | 1.59E-01 |
| rs4526799 | Brain_Spinal_cord_cervical_c-1 | 12 | STAC3         | 57641106 | rs10876951 | 0.9085 | 57306430 | T | G | 0.35 | 1.15E-02 | 3.15E-02 | 1.99E-01 |
| rs4526799 | Brain_Spinal_cord_cervical_c-1 | 12 | CYP27B1       | 58158578 | rs10876951 | 0.9085 | 57306430 | T | G | 0.35 | 1.15E-02 | 3.41E-02 | 2.01E-01 |
| rs4526799 | Brain_Spinal_cord_cervical_c-1 | 12 | RAB5B         | 56378093 | rs10747774 | 0.9128 | 57307079 | T | C | 0.36 | 1.16E-02 | 2.50E-02 | 1.88E-01 |
| rs4526799 | Brain_Spinal_cord_cervical_c-1 | 12 | TAC3          | 57413225 | rs10747774 | 0.9128 | 57307079 | T | C | 0.36 | 1.16E-02 | 5.05E-03 | 1.60E-01 |
| rs4526799 | Brain_Spinal_cord_cervical_c-1 | 12 | STAC3         | 57641106 | rs10747774 | 0.9128 | 57307079 | T | C | 0.36 | 1.16E-02 | 3.33E-02 | 1.96E-01 |
| rs4526799 | Brain_Spinal_cord_cervical_c-1 | 12 | RAB5B         | 56378093 | rs10783812 | 0.9085 | 57308723 | C | T | 0.35 | 1.19E-02 | 3.34E-02 | 2.03E-01 |
| rs4526799 | Brain_Spinal_cord_cervical_c-1 | 12 | TAC3          | 57413225 | rs10783812 | 0.9085 | 57308723 | C | T | 0.35 | 1.19E-02 | 2.85E-03 | 1.61E-01 |
| rs4526799 | Brain_Spinal_cord_cervical_c-1 | 12 | STAC3         | 57641106 | rs10783812 | 0.9085 | 57308723 | C | T | 0.35 | 1.19E-02 | 2.78E-02 | 1.98E-01 |
| rs4526799 | Brain_Spinal_cord_cervical_c-1 | 12 | CYP27B1       | 58158578 | rs10783812 | 0.9085 | 57308723 | C | T | 0.35 | 1.19E-02 | 3.37E-02 | 2.04E-01 |
| rs4526799 | Brain_Spinal_cord_cervical_c-1 | 12 | RAB5B         | 56378093 | rs11172056 | 0.9089 | 57308975 | C | T | 0.37 | 1.10E-02 | 2.50E-02 | 1.83E-01 |
| rs4526799 | Brain_Spinal_cord_cervical_c-1 | 12 | TAC3          | 57413225 | rs11172056 | 0.9089 | 57308975 | C | T | 0.37 | 1.10E-02 | 5.05E-03 | 1.54E-01 |
| rs4526799 | Brain_Spinal_cord_cervical_c-1 | 12 | STAC3         | 57641106 | rs11172056 | 0.9089 | 57308975 | C | T | 0.37 | 1.10E-02 | 3.33E-02 | 1.92E-01 |
| rs4526799 | Brain_Spinal_cord_cervical_c-1 | 12 | RAB5B         | 56378093 | rs7302420  | 0.9085 | 57309884 | G | C | 0.36 | 1.54E-02 | 3.37E-02 | 2.19E-01 |
| rs4526799 | Brain_Spinal_cord_cervical_c-1 | 12 | TAC3          | 57413225 | rs7302420  | 0.9085 | 57309884 | G | C | 0.36 | 1.54E-02 | 5.12E-03 | 1.85E-01 |
| rs4526799 | Brain_Spinal_cord_cervical_c-1 | 12 | STAC3         | 57641106 | rs7302420  | 0.9085 | 57309884 | G | C | 0.36 | 1.54E-02 | 3.04E-02 | 2.16E-01 |
| rs4526799 | Brain_Spinal_cord_cervical_c-1 | 12 | CYP27B1       | 58158578 | rs7302420  | 0.9085 | 57309884 | G | C | 0.36 | 1.54E-02 | 3.19E-02 | 2.18E-01 |
| rs4526799 | Brain_Spinal_cord_cervical_c-1 | 12 | RAB5B         | 56378093 | rs12228618 | 0.9128 | 57311229 | T | C | 0.37 | 1.29E-02 | 3.39E-02 | 2.01E-01 |
| rs4526799 | Brain_Spinal_cord_cervical_c-1 | 12 | ESYT1         | 56530147 | rs12228618 | 0.9128 | 57311229 | T | C | 0.37 | 1.29E-02 | 2.76E-02 | 1.94E-01 |
| rs4526799 | Brain_Spinal_cord_cervical_c-1 | 12 | TAC3          | 57413225 | rs12228618 | 0.9128 | 57311229 | T | C | 0.37 | 1.29E-02 | 6.93E-03 | 1.68E-01 |
| rs4526799 | Brain_Spinal_cord_cervical_c-1 | 12 | STAC3         | 57641106 | rs12228618 | 0.9128 | 57311229 | T | C | 0.37 | 1.29E-02 | 2.77E-02 | 1.95E-01 |
| rs4526799 | Brain_Spinal_cord_cervical_c-1 | 12 | RAB5B         | 56378093 | rs9739473  | 0.9012 | 57313335 | A | T | 0.37 | 2.65E-02 | 3.39E-02 | 2.67E-01 |
| rs4526799 | Brain_Spinal_cord_cervical_c-1 | 12 | ESYT1         | 56530147 | rs9739473  | 0.9012 | 57313335 | A | T | 0.37 | 2.65E-02 | 2.76E-02 | 2.62E-01 |
| rs4526799 | Brain_Spinal_cord_cervical_c-1 | 12 | TAC3          | 57413225 | rs9739473  | 0.9012 | 57313335 | A | T | 0.37 | 2.65E-02 | 6.93E-03 | 2.41E-01 |
| rs4526799 | Brain_Spinal_cord_cervical_c-1 | 12 | STAC3         | 57641106 | rs9739473  | 0.9012 | 57313335 | A | T | 0.37 | 2.65E-02 | 2.77E-02 | 2.62E-01 |
| rs4526799 | Brain_Substantia_nigra         | 12 | RP11-153M3.1  | 56905636 | rs9919772  | 0.8450 | 57260027 | T | C | 0.33 | 1.03E-02 | 2.75E-02 | 2.17E-01 |
| rs4526799 | Brain_Substantia_nigra         | 12 | ZBTB39        | 57396424 | rs9919772  | 0.8450 | 57260027 | T | C | 0.33 | 1.03E-02 | 2.81E-02 | 2.18E-01 |
| rs4526799 | Brain_Substantia_nigra         | 12 | METTLL21B     | 58170856 | rs9919772  | 0.8450 | 57260027 | T | C | 0.33 | 1.03E-02 | 3.96E-02 | 2.28E-01 |
| rs4526799 | Brain_Substantia_nigra         | 12 | RP11-603J24.7 | 56374517 | rs4495925  | 0.8650 | 57268116 | C | G | 0.33 | 1.04E-02 | 4.92E-02 | 2.32E-01 |

|           |                        |    |               |          |            |        |          |   |   |      |          |          |          |
|-----------|------------------------|----|---------------|----------|------------|--------|----------|---|---|------|----------|----------|----------|
| rs4526799 | Brain_Substantia_nigra | 12 | RP11-153M3.1  | 56905636 | rs4495925  | 0.8650 | 57268116 | C | G | 0.33 | 1.04E-02 | 4.02E-02 | 2.25E-01 |
| rs4526799 | Brain_Substantia_nigra | 12 | ZBTB39        | 57396424 | rs4495925  | 0.8650 | 57268116 | C | G | 0.33 | 1.04E-02 | 2.39E-02 | 2.11E-01 |
| rs4526799 | Brain_Substantia_nigra | 12 | CYP27B1       | 58158578 | rs4495925  | 0.8650 | 57268116 | C | G | 0.33 | 1.04E-02 | 4.87E-02 | 2.32E-01 |
| rs4526799 | Brain_Substantia_nigra | 12 | METTL21B      | 58170856 | rs4495925  | 0.8650 | 57268116 | C | G | 0.33 | 1.04E-02 | 4.44E-02 | 2.29E-01 |
| rs4526799 | Brain_Substantia_nigra | 12 | RP11-603J24.7 | 56374517 | rs4471472  | 0.8650 | 57268985 | A | G | 0.32 | 9.99E-03 | 4.94E-02 | 2.29E-01 |
| rs4526799 | Brain_Substantia_nigra | 12 | RP11-153M3.1  | 56905636 | rs4471472  | 0.8650 | 57268985 | A | G | 0.32 | 9.99E-03 | 3.20E-02 | 2.15E-01 |
| rs4526799 | Brain_Substantia_nigra | 12 | ZBTB39        | 57396424 | rs4471472  | 0.8650 | 57268985 | A | G | 0.32 | 9.99E-03 | 1.86E-02 | 2.01E-01 |
| rs4526799 | Brain_Substantia_nigra | 12 | METTL21B      | 58170856 | rs4471472  | 0.8650 | 57268985 | A | G | 0.32 | 9.99E-03 | 4.14E-02 | 2.23E-01 |
| rs4526799 | Brain_Substantia_nigra | 12 | RP11-603J24.7 | 56374517 | rs4633499  | 0.8610 | 57269264 | A | T | 0.32 | 1.43E-02 | 4.26E-02 | 2.57E-01 |
| rs4526799 | Brain_Substantia_nigra | 12 | METTL21B      | 58170856 | rs4633499  | 0.8610 | 57269264 | A | T | 0.32 | 1.43E-02 | 4.25E-02 | 2.57E-01 |
| rs4526799 | Brain_Substantia_nigra | 12 | RP11-603J24.7 | 56374517 | rs12300079 | 0.9956 | 57273194 | T | C | 0.36 | 3.73E-03 | 3.56E-02 | 1.70E-01 |
| rs4526799 | Brain_Substantia_nigra | 12 | MYL6          | 56554355 | rs12300079 | 0.9956 | 57273194 | T | C | 0.36 | 3.73E-03 | 3.69E-02 | 1.71E-01 |
| rs4526799 | Brain_Substantia_nigra | 12 | RP11-153M3.1  | 56905636 | rs12300079 | 0.9956 | 57273194 | T | C | 0.36 | 3.73E-03 | 4.31E-02 | 1.77E-01 |
| rs4526799 | Brain_Substantia_nigra | 12 | CYP27B1       | 58158578 | rs12300079 | 0.9956 | 57273194 | T | C | 0.36 | 3.73E-03 | 4.56E-02 | 1.80E-01 |
| rs4526799 | Brain_Substantia_nigra | 12 | RP11-603J24.7 | 56374517 | rs12300191 | 0.9956 | 57273289 | A | G | 0.36 | 3.59E-03 | 3.56E-02 | 1.68E-01 |
| rs4526799 | Brain_Substantia_nigra | 12 | MYL6          | 56554355 | rs12300191 | 0.9956 | 57273289 | A | G | 0.36 | 3.59E-03 | 3.69E-02 | 1.69E-01 |
| rs4526799 | Brain_Substantia_nigra | 12 | RP11-153M3.1  | 56905636 | rs12300191 | 0.9956 | 57273289 | A | G | 0.36 | 3.59E-03 | 4.31E-02 | 1.75E-01 |
| rs4526799 | Brain_Substantia_nigra | 12 | CYP27B1       | 58158578 | rs12300191 | 0.9956 | 57273289 | A | G | 0.36 | 3.59E-03 | 4.56E-02 | 1.77E-01 |
| rs4526799 | Brain_Substantia_nigra | 12 | RP11-603J24.7 | 56374517 | rs4514464  | 0.9956 | 57276375 | C | T | 0.36 | 2.92E-03 | 3.56E-02 | 1.65E-01 |
| rs4526799 | Brain_Substantia_nigra | 12 | MYL6          | 56554355 | rs4514464  | 0.9956 | 57276375 | C | T | 0.36 | 2.92E-03 | 3.69E-02 | 1.66E-01 |
| rs4526799 | Brain_Substantia_nigra | 12 | RP11-153M3.1  | 56905636 | rs4514464  | 0.9956 | 57276375 | C | T | 0.36 | 2.92E-03 | 4.31E-02 | 1.72E-01 |
| rs4526799 | Brain_Substantia_nigra | 12 | CYP27B1       | 58158578 | rs4514464  | 0.9956 | 57276375 | C | T | 0.36 | 2.92E-03 | 4.56E-02 | 1.74E-01 |
| rs4526799 | Brain_Substantia_nigra | 12 | RP11-603J24.7 | 56374517 | rs4417325  | 0.9956 | 57277302 | G | A | 0.36 | 3.59E-03 | 3.56E-02 | 1.68E-01 |
| rs4526799 | Brain_Substantia_nigra | 12 | MYL6          | 56554355 | rs4417325  | 0.9956 | 57277302 | G | A | 0.36 | 3.59E-03 | 3.69E-02 | 1.69E-01 |
| rs4526799 | Brain_Substantia_nigra | 12 | RP11-153M3.1  | 56905636 | rs4417325  | 0.9956 | 57277302 | G | A | 0.36 | 3.59E-03 | 4.31E-02 | 1.75E-01 |
| rs4526799 | Brain_Substantia_nigra | 12 | CYP27B1       | 58158578 | rs4417325  | 0.9956 | 57277302 | G | A | 0.36 | 3.59E-03 | 4.56E-02 | 1.77E-01 |
| rs4526799 | Brain_Substantia_nigra | 12 | RP11-603J24.7 | 56374517 | rs11172030 | 0.9956 | 57278076 | A | C | 0.36 | 3.63E-03 | 3.56E-02 | 1.69E-01 |
| rs4526799 | Brain_Substantia_nigra | 12 | MYL6          | 56554355 | rs11172030 | 0.9956 | 57278076 | A | C | 0.36 | 3.63E-03 | 3.69E-02 | 1.70E-01 |
| rs4526799 | Brain_Substantia_nigra | 12 | RP11-153M3.1  | 56905636 | rs11172030 | 0.9956 | 57278076 | A | C | 0.36 | 3.63E-03 | 4.31E-02 | 1.76E-01 |
| rs4526799 | Brain_Substantia_nigra | 12 | CYP27B1       | 58158578 | rs11172030 | 0.9956 | 57278076 | A | C | 0.36 | 3.63E-03 | 4.56E-02 | 1.78E-01 |
| rs4526799 | Brain_Substantia_nigra | 12 | RP11-603J24.7 | 56374517 | rs10876944 | 0.9956 | 57279372 | T | A | 0.36 | 3.63E-03 | 3.56E-02 | 1.69E-01 |
| rs4526799 | Brain_Substantia_nigra | 12 | MYL6          | 56554355 | rs10876944 | 0.9956 | 57279372 | T | A | 0.36 | 3.63E-03 | 3.69E-02 | 1.70E-01 |
| rs4526799 | Brain_Substantia_nigra | 12 | RP11-153M3.1  | 56905636 | rs10876944 | 0.9956 | 57279372 | T | A | 0.36 | 3.63E-03 | 4.31E-02 | 1.76E-01 |
| rs4526799 | Brain_Substantia_nigra | 12 | CYP27B1       | 58158578 | rs10876944 | 0.9956 | 57279372 | T | A | 0.36 | 3.63E-03 | 4.56E-02 | 1.78E-01 |
| rs4526799 | Brain_Substantia_nigra | 12 | RP11-603J24.7 | 56374517 | rs4326839  | 0.9956 | 57280374 | G | C | 0.36 | 3.58E-03 | 3.56E-02 | 1.68E-01 |
| rs4526799 | Brain_Substantia_nigra | 12 | MYL6          | 56554355 | rs4326839  | 0.9956 | 57280374 | G | C | 0.36 | 3.58E-03 | 3.69E-02 | 1.69E-01 |
| rs4526799 | Brain_Substantia_nigra | 12 | RP11-153M3.1  | 56905636 | rs4326839  | 0.9956 | 57280374 | G | C | 0.36 | 3.58E-03 | 4.31E-02 | 1.75E-01 |
| rs4526799 | Brain_Substantia_nigra | 12 | CYP27B1       | 58158578 | rs4326839  | 0.9956 | 57280374 | G | C | 0.36 | 3.58E-03 | 4.56E-02 | 1.77E-01 |
| rs4526799 | Brain_Substantia_nigra | 12 | RP11-603J24.7 | 56374517 | rs4526799  | 1.0000 | 57280586 | T | C | 0.34 | 7.26E-06 | 3.56E-02 | 7.06E-02 |
| rs4526799 | Brain_Substantia_nigra | 12 | MYL6          | 56554355 | rs4526799  | 1.0000 | 57280586 | T | C | 0.34 | 7.26E-06 | 3.69E-02 | 7.20E-02 |



|           |                        |    |               |          |            |        |          |   |   |      |          |          |          |
|-----------|------------------------|----|---------------|----------|------------|--------|----------|---|---|------|----------|----------|----------|
| rs4526799 | Brain_Substantia_nigra | 12 | RP11-153M3.1  | 56905636 | rs4526799  | 1.0000 | 57280586 | T | C | 0.34 | 7.26E-06 | 4.31E-02 | 7.88E-02 |
| rs4526799 | Brain_Substantia_nigra | 12 | CYP27B1       | 58158578 | rs4526799  | 1.0000 | 57280586 | T | C | 0.34 | 7.26E-06 | 4.56E-02 | 8.15E-02 |
| rs4526799 | Brain_Substantia_nigra | 12 | RP11-603J24.7 | 56374517 | rs28876529 | 0.9956 | 57285301 | T | A | 0.36 | 2.25E-03 | 3.56E-02 | 1.53E-01 |
| rs4526799 | Brain_Substantia_nigra | 12 | MYL6          | 56554355 | rs28876529 | 0.9956 | 57285301 | T | A | 0.36 | 2.25E-03 | 3.69E-02 | 1.54E-01 |
| rs4526799 | Brain_Substantia_nigra | 12 | RP11-153M3.1  | 56905636 | rs28876529 | 0.9956 | 57285301 | T | A | 0.36 | 2.25E-03 | 4.31E-02 | 1.60E-01 |
| rs4526799 | Brain_Substantia_nigra | 12 | CYP27B1       | 58158578 | rs28876529 | 0.9956 | 57285301 | T | A | 0.36 | 2.25E-03 | 4.56E-02 | 1.63E-01 |
| rs4526799 | Brain_Substantia_nigra | 12 | RP11-603J24.7 | 56374517 | rs11172037 | 0.9956 | 57285427 | T | A | 0.36 | 2.25E-03 | 3.56E-02 | 1.53E-01 |
| rs4526799 | Brain_Substantia_nigra | 12 | MYL6          | 56554355 | rs11172037 | 0.9956 | 57285427 | T | A | 0.36 | 2.25E-03 | 3.69E-02 | 1.54E-01 |
| rs4526799 | Brain_Substantia_nigra | 12 | RP11-153M3.1  | 56905636 | rs11172037 | 0.9956 | 57285427 | T | A | 0.36 | 2.25E-03 | 4.31E-02 | 1.60E-01 |
| rs4526799 | Brain_Substantia_nigra | 12 | CYP27B1       | 58158578 | rs11172037 | 0.9956 | 57285427 | T | A | 0.36 | 2.25E-03 | 4.56E-02 | 1.63E-01 |
| rs4526799 | Brain_Substantia_nigra | 12 | RP11-603J24.7 | 56374517 | rs12321987 | 0.9956 | 57288449 | G | A | 0.36 | 4.47E-03 | 3.56E-02 | 1.89E-01 |
| rs4526799 | Brain_Substantia_nigra | 12 | MYL6          | 56554355 | rs12321987 | 0.9956 | 57288449 | G | A | 0.36 | 4.47E-03 | 3.69E-02 | 1.90E-01 |
| rs4526799 | Brain_Substantia_nigra | 12 | RP11-153M3.1  | 56905636 | rs12321987 | 0.9956 | 57288449 | G | A | 0.36 | 4.47E-03 | 4.31E-02 | 1.96E-01 |
| rs4526799 | Brain_Substantia_nigra | 12 | CYP27B1       | 58158578 | rs12321987 | 0.9956 | 57288449 | G | A | 0.36 | 4.47E-03 | 4.56E-02 | 1.98E-01 |
| rs4526799 | Brain_Substantia_nigra | 12 | RP11-603J24.7 | 56374517 | rs11172043 | 0.9869 | 57293182 | G | A | 0.35 | 4.58E-03 | 4.53E-02 | 1.96E-01 |
| rs4526799 | Brain_Substantia_nigra | 12 | RP11-603J24.7 | 56374517 | rs12426816 | 0.9869 | 57294074 | A | C | 0.35 | 4.50E-03 | 4.53E-02 | 1.96E-01 |
| rs4526799 | Brain_Substantia_nigra | 12 | RP11-603J24.7 | 56374517 | rs11172047 | 0.9869 | 57298080 | T | C | 0.35 | 6.51E-03 | 4.53E-02 | 2.09E-01 |
| rs4526799 | Brain_Substantia_nigra | 12 | RP11-603J24.7 | 56374517 | rs2371631  | 0.9869 | 57298614 | T | A | 0.35 | 6.32E-03 | 4.53E-02 | 2.06E-01 |
| rs4526799 | Brain_Substantia_nigra | 12 | RP11-603J24.7 | 56374517 | rs12305763 | 0.9869 | 57299263 | G | A | 0.35 | 6.82E-03 | 4.53E-02 | 2.11E-01 |
| rs4526799 | Brain_Substantia_nigra | 12 | RP11-153M3.1  | 56905636 | rs11172049 | 0.9128 | 57304203 | T | C | 0.35 | 1.15E-02 | 4.76E-02 | 2.13E-01 |
| rs4526799 | Brain_Substantia_nigra | 12 | RP11-153M3.1  | 56905636 | rs1874888  | 0.9085 | 57305138 | A | C | 0.35 | 1.15E-02 | 4.76E-02 | 2.13E-01 |
| rs4526799 | Brain_Substantia_nigra | 12 | RP11-603J24.7 | 56374517 | rs10506349 | 0.9128 | 57306412 | T | C | 0.37 | 1.10E-02 | 1.81E-02 | 1.75E-01 |
| rs4526799 | Brain_Substantia_nigra | 12 | HSD17B6       | 57163759 | rs10506349 | 0.9128 | 57306412 | T | C | 0.37 | 1.10E-02 | 3.83E-02 | 1.96E-01 |
| rs4526799 | Brain_Substantia_nigra | 12 | ZBTB39        | 57396424 | rs10506349 | 0.9128 | 57306412 | T | C | 0.37 | 1.10E-02 | 4.61E-02 | 2.03E-01 |
| rs4526799 | Brain_Substantia_nigra | 12 | NXPH4         | 57615405 | rs10506349 | 0.9128 | 57306412 | T | C | 0.37 | 1.10E-02 | 4.16E-02 | 1.99E-01 |
| rs4526799 | Brain_Substantia_nigra | 12 | CYP27B1       | 58158578 | rs10506349 | 0.9128 | 57306412 | T | C | 0.37 | 1.10E-02 | 1.47E-02 | 1.71E-01 |
| rs4526799 | Brain_Substantia_nigra | 12 | RP11-153M3.1  | 56905636 | rs10876951 | 0.9085 | 57306430 | T | G | 0.35 | 1.15E-02 | 4.76E-02 | 2.13E-01 |
| rs4526799 | Brain_Substantia_nigra | 12 | RP11-603J24.7 | 56374517 | rs10747774 | 0.9128 | 57307079 | T | C | 0.36 | 1.16E-02 | 1.81E-02 | 1.80E-01 |
| rs4526799 | Brain_Substantia_nigra | 12 | HSD17B6       | 57163759 | rs10747774 | 0.9128 | 57307079 | T | C | 0.36 | 1.16E-02 | 3.83E-02 | 2.01E-01 |
| rs4526799 | Brain_Substantia_nigra | 12 | ZBTB39        | 57396424 | rs10747774 | 0.9128 | 57307079 | T | C | 0.36 | 1.16E-02 | 4.61E-02 | 2.08E-01 |
| rs4526799 | Brain_Substantia_nigra | 12 | NXPH4         | 57615405 | rs10747774 | 0.9128 | 57307079 | T | C | 0.36 | 1.16E-02 | 4.16E-02 | 2.04E-01 |
| rs4526799 | Brain_Substantia_nigra | 12 | CYP27B1       | 58158578 | rs10747774 | 0.9128 | 57307079 | T | C | 0.36 | 1.16E-02 | 1.47E-02 | 1.76E-01 |
| rs4526799 | Brain_Substantia_nigra | 12 | RP11-153M3.1  | 56905636 | rs10783812 | 0.9085 | 57308723 | C | T | 0.35 | 1.19E-02 | 4.76E-02 | 2.15E-01 |
| rs4526799 | Brain_Substantia_nigra | 12 | RP11-603J24.7 | 56374517 | rs11172056 | 0.9089 | 57308975 | C | T | 0.37 | 1.10E-02 | 1.81E-02 | 1.75E-01 |
| rs4526799 | Brain_Substantia_nigra | 12 | HSD17B6       | 57163759 | rs11172056 | 0.9089 | 57308975 | C | T | 0.37 | 1.10E-02 | 3.83E-02 | 1.96E-01 |
| rs4526799 | Brain_Substantia_nigra | 12 | ZBTB39        | 57396424 | rs11172056 | 0.9089 | 57308975 | C | T | 0.37 | 1.10E-02 | 4.61E-02 | 2.03E-01 |
| rs4526799 | Brain_Substantia_nigra | 12 | NXPH4         | 57615405 | rs11172056 | 0.9089 | 57308975 | C | T | 0.37 | 1.10E-02 | 4.16E-02 | 1.99E-01 |
| rs4526799 | Brain_Substantia_nigra | 12 | CYP27B1       | 58158578 | rs11172056 | 0.9089 | 57308975 | C | T | 0.37 | 1.10E-02 | 1.47E-02 | 1.71E-01 |
| rs4526799 | Brain_Substantia_nigra | 12 | CYP27B1       | 58158578 | rs7302420  | 0.9085 | 57309884 | G | C | 0.36 | 1.54E-02 | 4.51E-02 | 2.28E-01 |
| rs4526799 | Brain_Substantia_nigra | 12 | RP11-603J24.7 | 56374517 | rs12228618 | 0.9128 | 57311229 | T | C | 0.37 | 1.29E-02 | 1.33E-02 | 1.78E-01 |

|           |                        |    |                       |          |            |        |          |   |   |      |          |          |          |
|-----------|------------------------|----|-----------------------|----------|------------|--------|----------|---|---|------|----------|----------|----------|
| rs4526799 | Brain_Substantia_nigra | 12 | <i>NXPH4</i>          | 57615405 | rs12228618 | 0.9128 | 57311229 | T | C | 0.37 | 1.29E-02 | 2.73E-02 | 1.94E-01 |
| rs4526799 | Brain_Substantia_nigra | 12 | <i>CYP27B1</i>        | 58158578 | rs12228618 | 0.9128 | 57311229 | T | C | 0.37 | 1.29E-02 | 1.24E-02 | 1.77E-01 |
| rs4526799 | Brain_Substantia_nigra | 12 | <i>RP11-603J24.7</i>  | 56374517 | rs9739473  | 0.9012 | 57313335 | A | T | 0.37 | 2.65E-02 | 1.33E-02 | 2.49E-01 |
| rs4526799 | Brain_Substantia_nigra | 12 | <i>NXPH4</i>          | 57615405 | rs9739473  | 0.9012 | 57313335 | A | T | 0.37 | 2.65E-02 | 2.73E-02 | 2.62E-01 |
| rs4526799 | Brain_Substantia_nigra | 12 | <i>CYP27B1</i>        | 58158578 | rs9739473  | 0.9012 | 57313335 | A | T | 0.37 | 2.65E-02 | 1.24E-02 | 2.48E-01 |
| rs4526799 | Whole_Blood            | 12 | <i>WIBG</i>           | 56310770 | rs9919772  | 0.8450 | 57260027 | T | C | 0.33 | 1.03E-02 | 4.91E-02 | 2.35E-01 |
| rs4526799 | Whole_Blood            | 12 | <i>GLS2</i>           | 56873481 | rs9919772  | 0.8450 | 57260027 | T | C | 0.33 | 1.03E-02 | 4.22E-02 | 2.30E-01 |
| rs4526799 | Whole_Blood            | 12 | <i>NAB2</i>           | 57485933 | rs9919772  | 0.8450 | 57260027 | T | C | 0.33 | 1.03E-02 | 7.19E-03 | 1.93E-01 |
| rs4526799 | Whole_Blood            | 12 | <i>KIF5A</i>          | 57962098 | rs9919772  | 0.8450 | 57260027 | T | C | 0.33 | 1.03E-02 | 1.55E-02 | 2.05E-01 |
| rs4526799 | Whole_Blood            | 12 | <i>AGAP2</i>          | 58127694 | rs9919772  | 0.8450 | 57260027 | T | C | 0.33 | 1.03E-02 | 1.33E-02 | 2.02E-01 |
| rs4526799 | Whole_Blood            | 12 | <i>WIBG</i>           | 56310770 | rs4495925  | 0.8650 | 57268116 | C | G | 0.33 | 1.04E-02 | 4.67E-02 | 2.30E-01 |
| rs4526799 | Whole_Blood            | 12 | <i>GLS2</i>           | 56873481 | rs4495925  | 0.8650 | 57268116 | C | G | 0.33 | 1.04E-02 | 3.20E-02 | 2.18E-01 |
| rs4526799 | Whole_Blood            | 12 | <i>NAB2</i>           | 57485933 | rs4495925  | 0.8650 | 57268116 | C | G | 0.33 | 1.04E-02 | 1.24E-02 | 1.98E-01 |
| rs4526799 | Whole_Blood            | 12 | <i>KIF5A</i>          | 57962098 | rs4495925  | 0.8650 | 57268116 | C | G | 0.33 | 1.04E-02 | 2.01E-02 | 2.07E-01 |
| rs4526799 | Whole_Blood            | 12 | <i>AGAP2</i>          | 58127694 | rs4495925  | 0.8650 | 57268116 | C | G | 0.33 | 1.04E-02 | 9.49E-03 | 1.93E-01 |
| rs4526799 | Whole_Blood            | 12 | <i>WIBG</i>           | 56310770 | rs4471472  | 0.8650 | 57268985 | A | G | 0.32 | 9.99E-03 | 4.80E-02 | 2.28E-01 |
| rs4526799 | Whole_Blood            | 12 | <i>GLS2</i>           | 56873481 | rs4471472  | 0.8650 | 57268985 | A | G | 0.32 | 9.99E-03 | 3.14E-02 | 2.14E-01 |
| rs4526799 | Whole_Blood            | 12 | <i>NAB2</i>           | 57485933 | rs4471472  | 0.8650 | 57268985 | A | G | 0.32 | 9.99E-03 | 1.33E-02 | 1.95E-01 |
| rs4526799 | Whole_Blood            | 12 | <i>KIF5A</i>          | 57962098 | rs4471472  | 0.8650 | 57268985 | A | G | 0.32 | 9.99E-03 | 2.14E-02 | 2.04E-01 |
| rs4526799 | Whole_Blood            | 12 | <i>AGAP2</i>          | 58127694 | rs4471472  | 0.8650 | 57268985 | A | G | 0.32 | 9.99E-03 | 1.03E-02 | 1.91E-01 |
| rs4526799 | Whole_Blood            | 12 | <i>WIBG</i>           | 56310770 | rs4633499  | 0.8610 | 57269264 | A | T | 0.32 | 1.43E-02 | 4.79E-02 | 2.61E-01 |
| rs4526799 | Whole_Blood            | 12 | <i>GLS2</i>           | 56873481 | rs4633499  | 0.8610 | 57269264 | A | T | 0.32 | 1.43E-02 | 2.51E-02 | 2.43E-01 |
| rs4526799 | Whole_Blood            | 12 | <i>NAB2</i>           | 57485933 | rs4633499  | 0.8610 | 57269264 | A | T | 0.32 | 1.43E-02 | 1.32E-02 | 2.31E-01 |
| rs4526799 | Whole_Blood            | 12 | <i>KIF5A</i>          | 57962098 | rs4633499  | 0.8610 | 57269264 | A | T | 0.32 | 1.43E-02 | 4.39E-02 | 2.58E-01 |
| rs4526799 | Whole_Blood            | 12 | <i>AGAP2</i>          | 58127694 | rs4633499  | 0.8610 | 57269264 | A | T | 0.32 | 1.43E-02 | 9.18E-03 | 2.26E-01 |
| rs4526799 | Whole_Blood            | 12 | <i>RP11-977G19.11</i> | 56701259 | rs12300079 | 0.9956 | 57273194 | T | C | 0.36 | 3.73E-03 | 1.36E-02 | 1.44E-01 |
| rs4526799 | Whole_Blood            | 12 | <i>STAT2</i>          | 56744645 | rs12300079 | 0.9956 | 57273194 | T | C | 0.36 | 3.73E-03 | 3.35E-02 | 1.68E-01 |
| rs4526799 | Whole_Blood            | 12 | <i>GLS2</i>           | 56873481 | rs12300079 | 0.9956 | 57273194 | T | C | 0.36 | 3.73E-03 | 1.20E-02 | 1.42E-01 |
| rs4526799 | Whole_Blood            | 12 | <i>NAB2</i>           | 57485933 | rs12300079 | 0.9956 | 57273194 | T | C | 0.36 | 3.73E-03 | 7.42E-03 | 1.34E-01 |
| rs4526799 | Whole_Blood            | 12 | <i>KIF5A</i>          | 57962098 | rs12300079 | 0.9956 | 57273194 | T | C | 0.36 | 3.73E-03 | 5.04E-03 | 1.28E-01 |
| rs4526799 | Whole_Blood            | 12 | <i>RP11-571M6.8</i>   | 58118261 | rs12300079 | 0.9956 | 57273194 | T | C | 0.36 | 3.73E-03 | 4.69E-02 | 1.81E-01 |
| rs4526799 | Whole_Blood            | 12 | <i>AGAP2</i>          | 58127694 | rs12300079 | 0.9956 | 57273194 | T | C | 0.36 | 3.73E-03 | 1.50E-02 | 1.46E-01 |
| rs4526799 | Whole_Blood            | 12 | <i>RP11-977G19.11</i> | 56701259 | rs12300191 | 0.9956 | 57273289 | A | G | 0.36 | 3.59E-03 | 1.28E-02 | 1.41E-01 |
| rs4526799 | Whole_Blood            | 12 | <i>STAT2</i>          | 56744645 | rs12300191 | 0.9956 | 57273289 | A | G | 0.36 | 3.59E-03 | 3.80E-02 | 1.70E-01 |
| rs4526799 | Whole_Blood            | 12 | <i>GLS2</i>           | 56873481 | rs12300191 | 0.9956 | 57273289 | A | G | 0.36 | 3.59E-03 | 1.11E-02 | 1.38E-01 |
| rs4526799 | Whole_Blood            | 12 | <i>NAB2</i>           | 57485933 | rs12300191 | 0.9956 | 57273289 | A | G | 0.36 | 3.59E-03 | 7.35E-03 | 1.31E-01 |
| rs4526799 | Whole_Blood            | 12 | <i>KIF5A</i>          | 57962098 | rs12300191 | 0.9956 | 57273289 | A | G | 0.36 | 3.59E-03 | 4.78E-03 | 1.25E-01 |
| rs4526799 | Whole_Blood            | 12 | <i>AGAP2</i>          | 58127694 | rs12300191 | 0.9956 | 57273289 | A | G | 0.36 | 3.59E-03 | 1.40E-02 | 1.43E-01 |
| rs4526799 | Whole_Blood            | 12 | <i>RP11-977G19.11</i> | 56701259 | rs4514464  | 0.9956 | 57276375 | C | T | 0.36 | 2.92E-03 | 1.21E-02 | 1.36E-01 |
| rs4526799 | Whole_Blood            | 12 | <i>STAT2</i>          | 56744645 | rs4514464  | 0.9956 | 57276375 | C | T | 0.36 | 2.92E-03 | 3.25E-02 | 1.62E-01 |

|           |             |    |                |          |            |        |          |   |   |      |          |          |          |
|-----------|-------------|----|----------------|----------|------------|--------|----------|---|---|------|----------|----------|----------|
| rs4526799 | Whole_Blood | 12 | GLS2           | 56873481 | rs4514464  | 0.9956 | 57276375 | C | T | 0.36 | 2.92E-03 | 1.06E-02 | 1.34E-01 |
| rs4526799 | Whole_Blood | 12 | NAB2           | 57485933 | rs4514464  | 0.9956 | 57276375 | C | T | 0.36 | 2.92E-03 | 7.08E-03 | 1.27E-01 |
| rs4526799 | Whole_Blood | 12 | KIF5A          | 57962098 | rs4514464  | 0.9956 | 57276375 | C | T | 0.36 | 2.92E-03 | 5.09E-03 | 1.23E-01 |
| rs4526799 | Whole_Blood | 12 | RP11-571M6.8   | 58118261 | rs4514464  | 0.9956 | 57276375 | C | T | 0.36 | 2.92E-03 | 4.56E-02 | 1.74E-01 |
| rs4526799 | Whole_Blood | 12 | AGAP2          | 58127694 | rs4514464  | 0.9956 | 57276375 | C | T | 0.36 | 2.92E-03 | 1.48E-02 | 1.41E-01 |
| rs4526799 | Whole_Blood | 12 | RP11-977G19.11 | 56701259 | rs4417325  | 0.9956 | 57277302 | G | A | 0.36 | 3.59E-03 | 1.21E-02 | 1.40E-01 |
| rs4526799 | Whole_Blood | 12 | STAT2          | 56744645 | rs4417325  | 0.9956 | 57277302 | G | A | 0.36 | 3.59E-03 | 3.25E-02 | 1.65E-01 |
| rs4526799 | Whole_Blood | 12 | GLS2           | 56873481 | rs4417325  | 0.9956 | 57277302 | G | A | 0.36 | 3.59E-03 | 1.06E-02 | 1.37E-01 |
| rs4526799 | Whole_Blood | 12 | NAB2           | 57485933 | rs4417325  | 0.9956 | 57277302 | G | A | 0.36 | 3.59E-03 | 7.08E-03 | 1.31E-01 |
| rs4526799 | Whole_Blood | 12 | KIF5A          | 57962098 | rs4417325  | 0.9956 | 57277302 | G | A | 0.36 | 3.59E-03 | 5.09E-03 | 1.26E-01 |
| rs4526799 | Whole_Blood | 12 | RP11-571M6.8   | 58118261 | rs4417325  | 0.9956 | 57277302 | G | A | 0.36 | 3.59E-03 | 4.56E-02 | 1.78E-01 |
| rs4526799 | Whole_Blood | 12 | AGAP2          | 58127694 | rs4417325  | 0.9956 | 57277302 | G | A | 0.36 | 3.59E-03 | 1.48E-02 | 1.44E-01 |
| rs4526799 | Whole_Blood | 12 | RP11-977G19.11 | 56701259 | rs11172030 | 0.9956 | 57278076 | A | C | 0.36 | 3.63E-03 | 1.21E-02 | 1.40E-01 |
| rs4526799 | Whole_Blood | 12 | STAT2          | 56744645 | rs11172030 | 0.9956 | 57278076 | A | C | 0.36 | 3.63E-03 | 3.25E-02 | 1.65E-01 |
| rs4526799 | Whole_Blood | 12 | GLS2           | 56873481 | rs11172030 | 0.9956 | 57278076 | A | C | 0.36 | 3.63E-03 | 1.06E-02 | 1.38E-01 |
| rs4526799 | Whole_Blood | 12 | NAB2           | 57485933 | rs11172030 | 0.9956 | 57278076 | A | C | 0.36 | 3.63E-03 | 7.08E-03 | 1.31E-01 |
| rs4526799 | Whole_Blood | 12 | KIF5A          | 57962098 | rs11172030 | 0.9956 | 57278076 | A | C | 0.36 | 3.63E-03 | 5.09E-03 | 1.27E-01 |
| rs4526799 | Whole_Blood | 12 | RP11-571M6.8   | 58118261 | rs11172030 | 0.9956 | 57278076 | A | C | 0.36 | 3.63E-03 | 4.56E-02 | 1.78E-01 |
| rs4526799 | Whole_Blood | 12 | AGAP2          | 58127694 | rs11172030 | 0.9956 | 57278076 | A | C | 0.36 | 3.63E-03 | 1.48E-02 | 1.44E-01 |
| rs4526799 | Whole_Blood | 12 | RP11-977G19.11 | 56701259 | rs10876944 | 0.9956 | 57279372 | T | A | 0.36 | 3.63E-03 | 1.21E-02 | 1.40E-01 |
| rs4526799 | Whole_Blood | 12 | STAT2          | 56744645 | rs10876944 | 0.9956 | 57279372 | T | A | 0.36 | 3.63E-03 | 3.25E-02 | 1.65E-01 |
| rs4526799 | Whole_Blood | 12 | GLS2           | 56873481 | rs10876944 | 0.9956 | 57279372 | T | A | 0.36 | 3.63E-03 | 1.06E-02 | 1.38E-01 |
| rs4526799 | Whole_Blood | 12 | NAB2           | 57485933 | rs10876944 | 0.9956 | 57279372 | T | A | 0.36 | 3.63E-03 | 7.08E-03 | 1.31E-01 |
| rs4526799 | Whole_Blood | 12 | KIF5A          | 57962098 | rs10876944 | 0.9956 | 57279372 | T | A | 0.36 | 3.63E-03 | 5.09E-03 | 1.27E-01 |
| rs4526799 | Whole_Blood | 12 | RP11-571M6.8   | 58118261 | rs10876944 | 0.9956 | 57279372 | T | A | 0.36 | 3.63E-03 | 4.56E-02 | 1.78E-01 |
| rs4526799 | Whole_Blood | 12 | AGAP2          | 58127694 | rs10876944 | 0.9956 | 57279372 | T | A | 0.36 | 3.63E-03 | 1.48E-02 | 1.44E-01 |
| rs4526799 | Whole_Blood | 12 | RP11-977G19.11 | 56701259 | rs4326839  | 0.9956 | 57280374 | G | C | 0.36 | 3.58E-03 | 1.21E-02 | 1.40E-01 |
| rs4526799 | Whole_Blood | 12 | STAT2          | 56744645 | rs4326839  | 0.9956 | 57280374 | G | C | 0.36 | 3.58E-03 | 3.25E-02 | 1.65E-01 |
| rs4526799 | Whole_Blood | 12 | GLS2           | 56873481 | rs4326839  | 0.9956 | 57280374 | G | C | 0.36 | 3.58E-03 | 1.06E-02 | 1.37E-01 |
| rs4526799 | Whole_Blood | 12 | NAB2           | 57485933 | rs4326839  | 0.9956 | 57280374 | G | C | 0.36 | 3.58E-03 | 7.08E-03 | 1.30E-01 |
| rs4526799 | Whole_Blood | 12 | KIF5A          | 57962098 | rs4326839  | 0.9956 | 57280374 | G | C | 0.36 | 3.58E-03 | 5.09E-03 | 1.26E-01 |
| rs4526799 | Whole_Blood | 12 | RP11-571M6.8   | 58118261 | rs4326839  | 0.9956 | 57280374 | G | C | 0.36 | 3.58E-03 | 4.56E-02 | 1.77E-01 |
| rs4526799 | Whole_Blood | 12 | AGAP2          | 58127694 | rs4326839  | 0.9956 | 57280374 | G | C | 0.36 | 3.58E-03 | 1.48E-02 | 1.44E-01 |
| rs4526799 | Whole_Blood | 12 | RP11-977G19.11 | 56701259 | rs4526799  | 1.0000 | 57280586 | T | C | 0.34 | 7.26E-06 | 1.21E-02 | 4.04E-02 |
| rs4526799 | Whole_Blood | 12 | STAT2          | 56744645 | rs4526799  | 1.0000 | 57280586 | T | C | 0.34 | 7.26E-06 | 3.25E-02 | 6.69E-02 |
| rs4526799 | Whole_Blood | 12 | GLS2           | 56873481 | rs4526799  | 1.0000 | 57280586 | T | C | 0.34 | 7.26E-06 | 1.06E-02 | 3.80E-02 |
| rs4526799 | Whole_Blood | 12 | NAB2           | 57485933 | rs4526799  | 1.0000 | 57280586 | T | C | 0.34 | 7.26E-06 | 7.08E-03 | 3.19E-02 |
| rs4526799 | Whole_Blood | 12 | KIF5A          | 57962098 | rs4526799  | 1.0000 | 57280586 | T | C | 0.34 | 7.26E-06 | 5.09E-03 | 2.79E-02 |
| rs4526799 | Whole_Blood | 12 | RP11-571M6.8   | 58118261 | rs4526799  | 1.0000 | 57280586 | T | C | 0.34 | 7.26E-06 | 4.56E-02 | 8.15E-02 |
| rs4526799 | Whole_Blood | 12 | AGAP2          | 58127694 | rs4526799  | 1.0000 | 57280586 | T | C | 0.34 | 7.26E-06 | 1.48E-02 | 4.45E-02 |

|           |             |    |                |          |            |        |          |   |   |      |          |          |          |
|-----------|-------------|----|----------------|----------|------------|--------|----------|---|---|------|----------|----------|----------|
| rs4526799 | Whole_Blood | 12 | RP11-977G19.11 | 56701259 | rs28876529 | 0.9956 | 57285301 | T | A | 0.36 | 2.25E-03 | 1.21E-02 | 1.24E-01 |
| rs4526799 | Whole_Blood | 12 | STAT2          | 56744645 | rs28876529 | 0.9956 | 57285301 | T | A | 0.36 | 2.25E-03 | 3.25E-02 | 1.50E-01 |
| rs4526799 | Whole_Blood | 12 | GLS2           | 56873481 | rs28876529 | 0.9956 | 57285301 | T | A | 0.36 | 2.25E-03 | 1.06E-02 | 1.21E-01 |
| rs4526799 | Whole_Blood | 12 | NAB2           | 57485933 | rs28876529 | 0.9956 | 57285301 | T | A | 0.36 | 2.25E-03 | 7.08E-03 | 1.14E-01 |
| rs4526799 | Whole_Blood | 12 | KIF5A          | 57962098 | rs28876529 | 0.9956 | 57285301 | T | A | 0.36 | 2.25E-03 | 5.09E-03 | 1.09E-01 |
| rs4526799 | Whole_Blood | 12 | RP11-571M6.8   | 58118261 | rs28876529 | 0.9956 | 57285301 | T | A | 0.36 | 2.25E-03 | 4.56E-02 | 1.63E-01 |
| rs4526799 | Whole_Blood | 12 | AGAP2          | 58127694 | rs28876529 | 0.9956 | 57285301 | T | A | 0.36 | 2.25E-03 | 1.48E-02 | 1.28E-01 |
| rs4526799 | Whole_Blood | 12 | RP11-977G19.11 | 56701259 | rs11172037 | 0.9956 | 57285427 | T | A | 0.36 | 2.25E-03 | 1.21E-02 | 1.24E-01 |
| rs4526799 | Whole_Blood | 12 | STAT2          | 56744645 | rs11172037 | 0.9956 | 57285427 | T | A | 0.36 | 2.25E-03 | 3.25E-02 | 1.50E-01 |
| rs4526799 | Whole_Blood | 12 | GLS2           | 56873481 | rs11172037 | 0.9956 | 57285427 | T | A | 0.36 | 2.25E-03 | 1.06E-02 | 1.21E-01 |
| rs4526799 | Whole_Blood | 12 | NAB2           | 57485933 | rs11172037 | 0.9956 | 57285427 | T | A | 0.36 | 2.25E-03 | 7.08E-03 | 1.14E-01 |
| rs4526799 | Whole_Blood | 12 | KIF5A          | 57962098 | rs11172037 | 0.9956 | 57285427 | T | A | 0.36 | 2.25E-03 | 5.09E-03 | 1.09E-01 |
| rs4526799 | Whole_Blood | 12 | RP11-571M6.8   | 58118261 | rs11172037 | 0.9956 | 57285427 | T | A | 0.36 | 2.25E-03 | 4.56E-02 | 1.63E-01 |
| rs4526799 | Whole_Blood | 12 | AGAP2          | 58127694 | rs11172037 | 0.9956 | 57285427 | T | A | 0.36 | 2.25E-03 | 1.48E-02 | 1.28E-01 |
| rs4526799 | Whole_Blood | 12 | RP11-977G19.11 | 56701259 | rs12321987 | 0.9956 | 57288449 | G | A | 0.36 | 4.47E-03 | 1.21E-02 | 1.62E-01 |
| rs4526799 | Whole_Blood | 12 | STAT2          | 56744645 | rs12321987 | 0.9956 | 57288449 | G | A | 0.36 | 4.47E-03 | 3.25E-02 | 1.86E-01 |
| rs4526799 | Whole_Blood | 12 | GLS2           | 56873481 | rs12321987 | 0.9956 | 57288449 | G | A | 0.36 | 4.47E-03 | 1.06E-02 | 1.60E-01 |
| rs4526799 | Whole_Blood | 12 | NAB2           | 57485933 | rs12321987 | 0.9956 | 57288449 | G | A | 0.36 | 4.47E-03 | 7.08E-03 | 1.53E-01 |
| rs4526799 | Whole_Blood | 12 | KIF5A          | 57962098 | rs12321987 | 0.9956 | 57288449 | G | A | 0.36 | 4.47E-03 | 5.09E-03 | 1.49E-01 |
| rs4526799 | Whole_Blood | 12 | RP11-571M6.8   | 58118261 | rs12321987 | 0.9956 | 57288449 | G | A | 0.36 | 4.47E-03 | 4.56E-02 | 1.98E-01 |
| rs4526799 | Whole_Blood | 12 | AGAP2          | 58127694 | rs12321987 | 0.9956 | 57288449 | G | A | 0.36 | 4.47E-03 | 1.48E-02 | 1.66E-01 |
| rs4526799 | Whole_Blood | 12 | RP11-977G19.11 | 56701259 | rs11172043 | 0.9869 | 57293182 | G | A | 0.35 | 4.58E-03 | 3.06E-02 | 1.83E-01 |
| rs4526799 | Whole_Blood | 12 | GLS2           | 56873481 | rs11172043 | 0.9869 | 57293182 | G | A | 0.35 | 4.58E-03 | 7.33E-03 | 1.52E-01 |
| rs4526799 | Whole_Blood | 12 | NAB2           | 57485933 | rs11172043 | 0.9869 | 57293182 | G | A | 0.35 | 4.58E-03 | 2.01E-02 | 1.71E-01 |
| rs4526799 | Whole_Blood | 12 | KIF5A          | 57962098 | rs11172043 | 0.9869 | 57293182 | G | A | 0.35 | 4.58E-03 | 2.13E-02 | 1.73E-01 |
| rs4526799 | Whole_Blood | 12 | AGAP2          | 58127694 | rs11172043 | 0.9869 | 57293182 | G | A | 0.35 | 4.58E-03 | 2.65E-02 | 1.78E-01 |
| rs4526799 | Whole_Blood | 12 | CDK4           | 58147010 | rs11172043 | 0.9869 | 57293182 | G | A | 0.35 | 4.58E-03 | 2.17E-02 | 1.73E-01 |
| rs4526799 | Whole_Blood | 12 | RP11-977G19.11 | 56701259 | rs12426816 | 0.9869 | 57294074 | A | C | 0.35 | 4.50E-03 | 2.97E-02 | 1.81E-01 |
| rs4526799 | Whole_Blood | 12 | GLS2           | 56873481 | rs12426816 | 0.9869 | 57294074 | A | C | 0.35 | 4.50E-03 | 7.30E-03 | 1.52E-01 |
| rs4526799 | Whole_Blood | 12 | NAB2           | 57485933 | rs12426816 | 0.9869 | 57294074 | A | C | 0.35 | 4.50E-03 | 1.96E-02 | 1.70E-01 |
| rs4526799 | Whole_Blood | 12 | KIF5A          | 57962098 | rs12426816 | 0.9869 | 57294074 | A | C | 0.35 | 4.50E-03 | 2.07E-02 | 1.72E-01 |
| rs4526799 | Whole_Blood | 12 | AGAP2          | 58127694 | rs12426816 | 0.9869 | 57294074 | A | C | 0.35 | 4.50E-03 | 2.73E-02 | 1.79E-01 |
| rs4526799 | Whole_Blood | 12 | CDK4           | 58147010 | rs12426816 | 0.9869 | 57294074 | A | C | 0.35 | 4.50E-03 | 2.12E-02 | 1.72E-01 |
| rs4526799 | Whole_Blood | 12 | RP11-977G19.11 | 56701259 | rs11172047 | 0.9869 | 57298080 | T | C | 0.35 | 6.51E-03 | 3.06E-02 | 1.96E-01 |
| rs4526799 | Whole_Blood | 12 | GLS2           | 56873481 | rs11172047 | 0.9869 | 57298080 | T | C | 0.35 | 6.51E-03 | 7.33E-03 | 1.67E-01 |
| rs4526799 | Whole_Blood | 12 | NAB2           | 57485933 | rs11172047 | 0.9869 | 57298080 | T | C | 0.35 | 6.51E-03 | 2.01E-02 | 1.85E-01 |
| rs4526799 | Whole_Blood | 12 | KIF5A          | 57962098 | rs11172047 | 0.9869 | 57298080 | T | C | 0.35 | 6.51E-03 | 2.13E-02 | 1.87E-01 |
| rs4526799 | Whole_Blood | 12 | AGAP2          | 58127694 | rs11172047 | 0.9869 | 57298080 | T | C | 0.35 | 6.51E-03 | 2.65E-02 | 1.92E-01 |
| rs4526799 | Whole_Blood | 12 | CDK4           | 58147010 | rs11172047 | 0.9869 | 57298080 | T | C | 0.35 | 6.51E-03 | 2.17E-02 | 1.87E-01 |
| rs4526799 | Whole_Blood | 12 | RP11-977G19.11 | 56701259 | rs2371631  | 0.9869 | 57298614 | T | A | 0.35 | 6.32E-03 | 3.06E-02 | 1.93E-01 |

|           |             |    |                |          |            |        |          |   |   |      |          |          |          |
|-----------|-------------|----|----------------|----------|------------|--------|----------|---|---|------|----------|----------|----------|
| rs4526799 | Whole_Blood | 12 | GLS2           | 56873481 | rs2371631  | 0.9869 | 57298614 | T | A | 0.35 | 6.32E-03 | 7.33E-03 | 1.64E-01 |
| rs4526799 | Whole_Blood | 12 | NAB2           | 57485933 | rs2371631  | 0.9869 | 57298614 | T | A | 0.35 | 6.32E-03 | 2.01E-02 | 1.82E-01 |
| rs4526799 | Whole_Blood | 12 | KIF5A          | 57962098 | rs2371631  | 0.9869 | 57298614 | T | A | 0.35 | 6.32E-03 | 2.13E-02 | 1.84E-01 |
| rs4526799 | Whole_Blood | 12 | AGAP2          | 58127694 | rs2371631  | 0.9869 | 57298614 | T | A | 0.35 | 6.32E-03 | 2.65E-02 | 1.89E-01 |
| rs4526799 | Whole_Blood | 12 | CDK4           | 58147010 | rs2371631  | 0.9869 | 57298614 | T | A | 0.35 | 6.32E-03 | 2.17E-02 | 1.84E-01 |
| rs4526799 | Whole_Blood | 12 | RP11-977G19.11 | 56701259 | rs12305763 | 0.9869 | 57299263 | G | A | 0.35 | 6.82E-03 | 3.29E-02 | 2.00E-01 |
| rs4526799 | Whole_Blood | 12 | GLS2           | 56873481 | rs12305763 | 0.9869 | 57299263 | G | A | 0.35 | 6.82E-03 | 8.73E-03 | 1.71E-01 |
| rs4526799 | Whole_Blood | 12 | NAB2           | 57485933 | rs12305763 | 0.9869 | 57299263 | G | A | 0.35 | 6.82E-03 | 6.45E-03 | 1.67E-01 |
| rs4526799 | Whole_Blood | 12 | KIF5A          | 57962098 | rs12305763 | 0.9869 | 57299263 | G | A | 0.35 | 6.82E-03 | 1.96E-02 | 1.86E-01 |
| rs4526799 | Whole_Blood | 12 | AGAP2          | 58127694 | rs12305763 | 0.9869 | 57299263 | G | A | 0.35 | 6.82E-03 | 2.80E-02 | 1.95E-01 |
| rs4526799 | Whole_Blood | 12 | CDK4           | 58147010 | rs12305763 | 0.9869 | 57299263 | G | A | 0.35 | 6.82E-03 | 2.92E-02 | 1.96E-01 |
| rs4526799 | Whole_Blood | 12 | RP11-977G19.11 | 56701259 | rs11172049 | 0.9128 | 57304203 | T | C | 0.35 | 1.15E-02 | 1.95E-02 | 1.86E-01 |
| rs4526799 | Whole_Blood | 12 | GLS2           | 56873481 | rs11172049 | 0.9128 | 57304203 | T | C | 0.35 | 1.15E-02 | 1.24E-02 | 1.77E-01 |
| rs4526799 | Whole_Blood | 12 | NAB2           | 57485933 | rs11172049 | 0.9128 | 57304203 | T | C | 0.35 | 1.15E-02 | 1.99E-02 | 1.87E-01 |
| rs4526799 | Whole_Blood | 12 | AGAP2          | 58127694 | rs11172049 | 0.9128 | 57304203 | T | C | 0.35 | 1.15E-02 | 2.88E-02 | 1.96E-01 |
| rs4526799 | Whole_Blood | 12 | RP11-977G19.11 | 56701259 | rs1874888  | 0.9085 | 57305138 | A | C | 0.35 | 1.15E-02 | 1.77E-02 | 1.84E-01 |
| rs4526799 | Whole_Blood | 12 | GLS2           | 56873481 | rs1874888  | 0.9085 | 57305138 | A | C | 0.35 | 1.15E-02 | 1.07E-02 | 1.75E-01 |
| rs4526799 | Whole_Blood | 12 | NAB2           | 57485933 | rs1874888  | 0.9085 | 57305138 | A | C | 0.35 | 1.15E-02 | 2.14E-02 | 1.88E-01 |
| rs4526799 | Whole_Blood | 12 | KIF5A          | 57962098 | rs1874888  | 0.9085 | 57305138 | A | C | 0.35 | 1.15E-02 | 4.96E-02 | 2.14E-01 |
| rs4526799 | Whole_Blood | 12 | AGAP2          | 58127694 | rs1874888  | 0.9085 | 57305138 | A | C | 0.35 | 1.15E-02 | 2.86E-02 | 1.96E-01 |
| rs4526799 | Whole_Blood | 12 | CDK4           | 58147010 | rs1874888  | 0.9085 | 57305138 | A | C | 0.35 | 1.15E-02 | 4.55E-02 | 2.11E-01 |
| rs4526799 | Whole_Blood | 12 | RAB5B          | 56378093 | rs10506349 | 0.9128 | 57306412 | T | C | 0.37 | 1.10E-02 | 3.75E-02 | 1.95E-01 |
| rs4526799 | Whole_Blood | 12 | ESYT1          | 56530147 | rs10506349 | 0.9128 | 57306412 | T | C | 0.37 | 1.10E-02 | 4.96E-02 | 2.06E-01 |
| rs4526799 | Whole_Blood | 12 | RP11-977G19.11 | 56701259 | rs10506349 | 0.9128 | 57306412 | T | C | 0.37 | 1.10E-02 | 1.98E-02 | 1.77E-01 |
| rs4526799 | Whole_Blood | 12 | GLS2           | 56873481 | rs10506349 | 0.9128 | 57306412 | T | C | 0.37 | 1.10E-02 | 4.63E-03 | 1.53E-01 |
| rs4526799 | Whole_Blood | 12 | NAB2           | 57485933 | rs10506349 | 0.9128 | 57306412 | T | C | 0.37 | 1.10E-02 | 8.39E-03 | 1.61E-01 |
| rs4526799 | Whole_Blood | 12 | KIF5A          | 57962098 | rs10506349 | 0.9128 | 57306412 | T | C | 0.37 | 1.10E-02 | 1.30E-02 | 1.68E-01 |
| rs4526799 | Whole_Blood | 12 | RP11-571M6.8   | 58118261 | rs10506349 | 0.9128 | 57306412 | T | C | 0.37 | 1.10E-02 | 1.68E-02 | 1.73E-01 |
| rs4526799 | Whole_Blood | 12 | AGAP2          | 58127694 | rs10506349 | 0.9128 | 57306412 | T | C | 0.37 | 1.10E-02 | 8.81E-03 | 1.62E-01 |
| rs4526799 | Whole_Blood | 12 | RP11-977G19.11 | 56701259 | rs10876951 | 0.9085 | 57306430 | T | G | 0.35 | 1.15E-02 | 1.77E-02 | 1.84E-01 |
| rs4526799 | Whole_Blood | 12 | GLS2           | 56873481 | rs10876951 | 0.9085 | 57306430 | T | G | 0.35 | 1.15E-02 | 1.07E-02 | 1.75E-01 |
| rs4526799 | Whole_Blood | 12 | NAB2           | 57485933 | rs10876951 | 0.9085 | 57306430 | T | G | 0.35 | 1.15E-02 | 2.14E-02 | 1.88E-01 |
| rs4526799 | Whole_Blood | 12 | KIF5A          | 57962098 | rs10876951 | 0.9085 | 57306430 | T | G | 0.35 | 1.15E-02 | 4.96E-02 | 2.14E-01 |
| rs4526799 | Whole_Blood | 12 | AGAP2          | 58127694 | rs10876951 | 0.9085 | 57306430 | T | G | 0.35 | 1.15E-02 | 2.86E-02 | 1.96E-01 |
| rs4526799 | Whole_Blood | 12 | CDK4           | 58147010 | rs10876951 | 0.9085 | 57306430 | T | G | 0.35 | 1.15E-02 | 4.55E-02 | 2.11E-01 |
| rs4526799 | Whole_Blood | 12 | RAB5B          | 56378093 | rs10747774 | 0.9128 | 57307079 | T | C | 0.36 | 1.16E-02 | 3.62E-02 | 1.99E-01 |
| rs4526799 | Whole_Blood | 12 | RP11-977G19.11 | 56701259 | rs10747774 | 0.9128 | 57307079 | T | C | 0.36 | 1.16E-02 | 2.02E-02 | 1.83E-01 |
| rs4526799 | Whole_Blood | 12 | GLS2           | 56873481 | rs10747774 | 0.9128 | 57307079 | T | C | 0.36 | 1.16E-02 | 4.50E-03 | 1.58E-01 |
| rs4526799 | Whole_Blood | 12 | NAB2           | 57485933 | rs10747774 | 0.9128 | 57307079 | T | C | 0.36 | 1.16E-02 | 8.04E-03 | 1.66E-01 |
| rs4526799 | Whole_Blood | 12 | KIF5A          | 57962098 | rs10747774 | 0.9128 | 57307079 | T | C | 0.36 | 1.16E-02 | 1.29E-02 | 1.74E-01 |

|            |                |    |                       |          |            |        |          |   |   |      |          |          |          |
|------------|----------------|----|-----------------------|----------|------------|--------|----------|---|---|------|----------|----------|----------|
| rs4526799  | Whole_Blood    | 12 | <i>RP11-571M6.8</i>   | 58118261 | rs10747774 | 0.9128 | 57307079 | T | C | 0.36 | 1.16E-02 | 1.64E-02 | 1.78E-01 |
| rs4526799  | Whole_Blood    | 12 | <i>AGAP2</i>          | 58127694 | rs10747774 | 0.9128 | 57307079 | T | C | 0.36 | 1.16E-02 | 7.78E-03 | 1.65E-01 |
| rs4526799  | Whole_Blood    | 12 | <i>RP11-977G19.11</i> | 56701259 | rs10783812 | 0.9085 | 57308723 | C | T | 0.35 | 1.19E-02 | 1.90E-02 | 1.89E-01 |
| rs4526799  | Whole_Blood    | 12 | <i>GLS2</i>           | 56873481 | rs10783812 | 0.9085 | 57308723 | C | T | 0.35 | 1.19E-02 | 1.52E-02 | 1.84E-01 |
| rs4526799  | Whole_Blood    | 12 | <i>NAB2</i>           | 57485933 | rs10783812 | 0.9085 | 57308723 | C | T | 0.35 | 1.19E-02 | 1.50E-02 | 1.84E-01 |
| rs4526799  | Whole_Blood    | 12 | <i>AGAP2</i>          | 58127694 | rs10783812 | 0.9085 | 57308723 | C | T | 0.35 | 1.19E-02 | 3.02E-02 | 2.00E-01 |
| rs4526799  | Whole_Blood    | 12 | <i>CDK4</i>           | 58147010 | rs10783812 | 0.9085 | 57308723 | C | T | 0.35 | 1.19E-02 | 3.39E-02 | 2.04E-01 |
| rs4526799  | Whole_Blood    | 12 | <i>RAB5B</i>          | 56378093 | rs11172056 | 0.9089 | 57308975 | C | T | 0.37 | 1.10E-02 | 3.58E-02 | 1.94E-01 |
| rs4526799  | Whole_Blood    | 12 | <i>RP11-977G19.11</i> | 56701259 | rs11172056 | 0.9089 | 57308975 | C | T | 0.37 | 1.10E-02 | 2.02E-02 | 1.78E-01 |
| rs4526799  | Whole_Blood    | 12 | <i>GLS2</i>           | 56873481 | rs11172056 | 0.9089 | 57308975 | C | T | 0.37 | 1.10E-02 | 4.30E-03 | 1.52E-01 |
| rs4526799  | Whole_Blood    | 12 | <i>NAB2</i>           | 57485933 | rs11172056 | 0.9089 | 57308975 | C | T | 0.37 | 1.10E-02 | 8.65E-03 | 1.62E-01 |
| rs4526799  | Whole_Blood    | 12 | <i>KIF5A</i>          | 57962098 | rs11172056 | 0.9089 | 57308975 | C | T | 0.37 | 1.10E-02 | 1.29E-02 | 1.68E-01 |
| rs4526799  | Whole_Blood    | 12 | <i>RP11-571M6.8</i>   | 58118261 | rs11172056 | 0.9089 | 57308975 | C | T | 0.37 | 1.10E-02 | 1.64E-02 | 1.73E-01 |
| rs4526799  | Whole_Blood    | 12 | <i>AGAP2</i>          | 58127694 | rs11172056 | 0.9089 | 57308975 | C | T | 0.37 | 1.10E-02 | 8.73E-03 | 1.62E-01 |
| rs4526799  | Whole_Blood    | 12 | <i>RP11-977G19.11</i> | 56701259 | rs7302420  | 0.9085 | 57309884 | G | C | 0.36 | 1.54E-02 | 9.42E-03 | 1.93E-01 |
| rs4526799  | Whole_Blood    | 12 | <i>GLS2</i>           | 56873481 | rs7302420  | 0.9085 | 57309884 | G | C | 0.36 | 1.54E-02 | 6.46E-03 | 1.87E-01 |
| rs4526799  | Whole_Blood    | 12 | <i>NAB2</i>           | 57485933 | rs7302420  | 0.9085 | 57309884 | G | C | 0.36 | 1.54E-02 | 7.98E-03 | 1.90E-01 |
| rs4526799  | Whole_Blood    | 12 | <i>KIF5A</i>          | 57962098 | rs7302420  | 0.9085 | 57309884 | G | C | 0.36 | 1.54E-02 | 3.17E-02 | 2.17E-01 |
| rs4526799  | Whole_Blood    | 12 | <i>RP11-571M6.8</i>   | 58118261 | rs7302420  | 0.9085 | 57309884 | G | C | 0.36 | 1.54E-02 | 3.85E-02 | 2.23E-01 |
| rs4526799  | Whole_Blood    | 12 | <i>AGAP2</i>          | 58127694 | rs7302420  | 0.9085 | 57309884 | G | C | 0.36 | 1.54E-02 | 8.78E-03 | 1.92E-01 |
| rs4526799  | Whole_Blood    | 12 | <i>RAB5B</i>          | 56378093 | rs12228618 | 0.9128 | 57311229 | T | C | 0.37 | 1.29E-02 | 3.72E-02 | 2.04E-01 |
| rs4526799  | Whole_Blood    | 12 | <i>RP11-977G19.11</i> | 56701259 | rs12228618 | 0.9128 | 57311229 | T | C | 0.37 | 1.29E-02 | 1.82E-02 | 1.84E-01 |
| rs4526799  | Whole_Blood    | 12 | <i>GLS2</i>           | 56873481 | rs12228618 | 0.9128 | 57311229 | T | C | 0.37 | 1.29E-02 | 4.23E-03 | 1.62E-01 |
| rs4526799  | Whole_Blood    | 12 | <i>NAB2</i>           | 57485933 | rs12228618 | 0.9128 | 57311229 | T | C | 0.37 | 1.29E-02 | 7.58E-03 | 1.69E-01 |
| rs4526799  | Whole_Blood    | 12 | <i>KIF5A</i>          | 57962098 | rs12228618 | 0.9128 | 57311229 | T | C | 0.37 | 1.29E-02 | 1.39E-02 | 1.79E-01 |
| rs4526799  | Whole_Blood    | 12 | <i>RP11-571M6.8</i>   | 58118261 | rs12228618 | 0.9128 | 57311229 | T | C | 0.37 | 1.29E-02 | 1.38E-02 | 1.79E-01 |
| rs4526799  | Whole_Blood    | 12 | <i>AGAP2</i>          | 58127694 | rs12228618 | 0.9128 | 57311229 | T | C | 0.37 | 1.29E-02 | 9.11E-03 | 1.72E-01 |
| rs4526799  | Whole_Blood    | 12 | <i>RAB5B</i>          | 56378093 | rs9739473  | 0.9012 | 57313335 | A | T | 0.37 | 2.65E-02 | 4.71E-02 | 2.76E-01 |
| rs4526799  | Whole_Blood    | 12 | <i>RP11-977G19.11</i> | 56701259 | rs9739473  | 0.9012 | 57313335 | A | T | 0.37 | 2.65E-02 | 1.48E-02 | 2.50E-01 |
| rs4526799  | Whole_Blood    | 12 | <i>GLS2</i>           | 56873481 | rs9739473  | 0.9012 | 57313335 | A | T | 0.37 | 2.65E-02 | 3.59E-03 | 2.34E-01 |
| rs4526799  | Whole_Blood    | 12 | <i>NAB2</i>           | 57485933 | rs9739473  | 0.9012 | 57313335 | A | T | 0.37 | 2.65E-02 | 5.66E-03 | 2.38E-01 |
| rs4526799  | Whole_Blood    | 12 | <i>KIF5A</i>          | 57962098 | rs9739473  | 0.9012 | 57313335 | A | T | 0.37 | 2.65E-02 | 2.36E-02 | 2.59E-01 |
| rs4526799  | Whole_Blood    | 12 | <i>RP11-571M6.8</i>   | 58118261 | rs9739473  | 0.9012 | 57313335 | A | T | 0.37 | 2.65E-02 | 1.36E-02 | 2.49E-01 |
| rs4526799  | Whole_Blood    | 12 | <i>AGAP2</i>          | 58127694 | rs9739473  | 0.9012 | 57313335 | A | T | 0.37 | 2.65E-02 | 5.83E-03 | 2.39E-01 |
| rs17105538 | Brain_Amygdala | 1  | <i>MED28P8</i>        | 82023161 | rs1338149  | 0.8903 | 81303974 | C | T | 0.13 | 4.17E-05 | 3.49E-02 | 6.26E-02 |
| rs17105538 | Brain_Amygdala | 1  | <i>MED28P8</i>        | 82023161 | rs28520679 | 0.9907 | 81307167 | T | C | 0.14 | 2.55E-05 | 2.23E-02 | 4.44E-02 |
| rs17105538 | Brain_Amygdala | 1  | <i>MED28P8</i>        | 82023161 | rs12066728 | 0.9907 | 81307791 | C | T | 0.14 | 1.18E-05 | 2.23E-02 | 4.22E-02 |
| rs17105538 | Brain_Amygdala | 1  | <i>MED28P8</i>        | 82023161 | rs74897995 | 0.9907 | 81308276 | T | C | 0.14 | 1.18E-05 | 1.30E-02 | 3.02E-02 |
| rs17105538 | Brain_Amygdala | 1  | <i>MED28P8</i>        | 82023161 | rs11585618 | 1.0000 | 81313870 | G | C | 0.15 | 1.30E-05 | 2.23E-02 | 4.24E-02 |
| rs17105538 | Brain_Amygdala | 1  | <i>MED28P8</i>        | 82023161 | rs17105538 | 1.0000 | 81315043 | G | A | 0.15 | 7.66E-06 | 2.23E-02 | 4.19E-02 |

|            |                          |   |         |          |            |        |          |   |   |      |          |          |          |
|------------|--------------------------|---|---------|----------|------------|--------|----------|---|---|------|----------|----------|----------|
| rs17105538 | Brain_Amygdala           | 1 | MED28P8 | 82023161 | rs12075367 | 0.9908 | 81316333 | A | G | 0.15 | 1.30E-05 | 2.23E-02 | 4.24E-02 |
| rs17105538 | Brain_Amygdala           | 1 | MED28P8 | 82023161 | rs7549268  | 1.0000 | 81321890 | G | T | 0.14 | 1.40E-05 | 2.44E-02 | 4.46E-02 |
| rs17105538 | Brain_Amygdala           | 1 | MED28P8 | 82023161 | rs76492418 | 0.9908 | 81323652 | G | A | 0.15 | 1.73E-05 | 2.23E-02 | 4.27E-02 |
| rs17105538 | Brain_Amygdala           | 1 | MED28P8 | 82023161 | rs75125610 | 0.9544 | 81336210 | G | T | 0.15 | 3.84E-05 | 3.65E-02 | 6.02E-02 |
| rs17105538 | Brain_Amygdala           | 1 | MED28P8 | 82023161 | rs77640848 | 0.9544 | 81336212 | C | T | 0.15 | 3.84E-05 | 3.65E-02 | 6.02E-02 |
| rs17105538 | Brain_Amygdala           | 1 | MED28P8 | 82023161 | rs17105542 | 0.9541 | 81336283 | T | G | 0.15 | 3.56E-05 | 3.92E-02 | 6.29E-02 |
| rs17105538 | Brain_Amygdala           | 1 | MED28P8 | 82023161 | rs11586177 | 0.9544 | 81336453 | G | A | 0.15 | 3.84E-05 | 4.90E-02 | 7.37E-02 |
| rs17105538 | Brain_Amygdala           | 1 | MED28P8 | 82023161 | rs11576605 | 0.9544 | 81336822 | T | C | 0.15 | 3.61E-05 | 4.87E-02 | 7.32E-02 |
| rs17105538 | Brain_Amygdala           | 1 | MED28P8 | 82023161 | rs11586583 | 0.9544 | 81336886 | C | A | 0.15 | 3.61E-05 | 2.72E-02 | 4.96E-02 |
| rs17105538 | Brain_Amygdala           | 1 | MED28P8 | 82023161 | rs17105555 | 0.9544 | 81337489 | T | C | 0.15 | 3.93E-05 | 4.13E-02 | 6.56E-02 |
| rs17105538 | Brain_Amygdala           | 1 | MED28P8 | 82023161 | rs17105556 | 0.9544 | 81337509 | A | C | 0.15 | 3.93E-05 | 3.57E-02 | 5.95E-02 |
| rs17105538 | Brain_Amygdala           | 1 | MED28P8 | 82023161 | rs78184327 | 0.9544 | 81337634 | T | C | 0.15 | 3.93E-05 | 3.65E-02 | 6.04E-02 |
| rs17105538 | Brain_Amygdala           | 1 | MED28P8 | 82023161 | rs17105560 | 0.9544 | 81337866 | A | G | 0.15 | 3.93E-05 | 3.65E-02 | 6.04E-02 |
| rs17105538 | Brain_Amygdala           | 1 | MED28P8 | 82023161 | rs17105564 | 0.9544 | 81338054 | C | T | 0.15 | 3.38E-05 | 3.65E-02 | 6.02E-02 |
| rs17105538 | Brain_Amygdala           | 1 | MED28P8 | 82023161 | rs17105567 | 0.9633 | 81338490 | A | T | 0.15 | 3.38E-05 | 3.65E-02 | 6.02E-02 |
| rs17105538 | Brain_Amygdala           | 1 | MED28P8 | 82023161 | rs17105569 | 0.9544 | 81338600 | T | A | 0.15 | 3.44E-05 | 3.65E-02 | 6.02E-02 |
| rs17105538 | Brain_Amygdala           | 1 | MED28P8 | 82023161 | rs79444150 | 0.9457 | 81339200 | A | G | 0.15 | 3.97E-05 | 3.65E-02 | 6.06E-02 |
| rs17105538 | Brain_Amygdala           | 1 | MED28P8 | 82023161 | rs17105572 | 0.9457 | 81339231 | A | G | 0.15 | 3.97E-05 | 3.65E-02 | 6.06E-02 |
| rs17105538 | Brain_Amygdala           | 1 | MED28P8 | 82023161 | rs75355701 | 0.9457 | 81339306 | G | A | 0.15 | 3.97E-05 | 3.65E-02 | 6.06E-02 |
| rs17105538 | Brain_Amygdala           | 1 | MED28P8 | 82023161 | rs12354210 | 0.9457 | 81339963 | G | A | 0.15 | 6.16E-05 | 3.44E-02 | 5.98E-02 |
| rs17105538 | Brain_Amygdala           | 1 | MED28P8 | 82023161 | rs11163145 | 0.9370 | 81340124 | C | T | 0.15 | 8.83E-05 | 3.65E-02 | 6.35E-02 |
| rs17105538 | Brain_Amygdala           | 1 | MED28P8 | 82023161 | rs17402942 | 0.8366 | 81340931 | C | A | 0.12 | 9.39E-03 | 4.77E-03 | 4.47E-02 |
| rs17105538 | Brain_Frontal_Cortex_BA9 | 1 | LPHN2   | 82114982 | rs75125610 | 0.9544 | 81336210 | G | T | 0.15 | 3.84E-05 | 2.85E-02 | 5.12E-02 |
| rs17105538 | Brain_Frontal_Cortex_BA9 | 1 | LPHN2   | 82114982 | rs77640848 | 0.9544 | 81336212 | C | T | 0.15 | 3.84E-05 | 2.85E-02 | 5.12E-02 |
| rs17105538 | Brain_Frontal_Cortex_BA9 | 1 | LPHN2   | 82114982 | rs11586177 | 0.9544 | 81336453 | G | A | 0.15 | 3.84E-05 | 2.85E-02 | 5.12E-02 |
| rs17105538 | Brain_Frontal_Cortex_BA9 | 1 | LPHN2   | 82114982 | rs11576605 | 0.9544 | 81336822 | T | C | 0.15 | 3.61E-05 | 2.90E-02 | 5.16E-02 |
| rs17105538 | Brain_Frontal_Cortex_BA9 | 1 | LPHN2   | 82114982 | rs11586583 | 0.9544 | 81336886 | C | A | 0.15 | 3.61E-05 | 3.17E-02 | 5.48E-02 |
| rs17105538 | Brain_Frontal_Cortex_BA9 | 1 | LPHN2   | 82114982 | rs17105555 | 0.9544 | 81337489 | T | C | 0.15 | 3.93E-05 | 4.66E-02 | 7.13E-02 |
| rs17105538 | Brain_Frontal_Cortex_BA9 | 1 | LPHN2   | 82114982 | rs17105556 | 0.9544 | 81337509 | A | C | 0.15 | 3.93E-05 | 4.35E-02 | 6.79E-02 |
| rs17105538 | Brain_Frontal_Cortex_BA9 | 1 | LPHN2   | 82114982 | rs78184327 | 0.9544 | 81337634 | T | C | 0.15 | 3.93E-05 | 3.59E-02 | 5.96E-02 |
| rs17105538 | Brain_Frontal_Cortex_BA9 | 1 | LPHN2   | 82114982 | rs17105560 | 0.9544 | 81337866 | A | G | 0.15 | 3.93E-05 | 2.87E-02 | 5.15E-02 |
| rs17105538 | Brain_Frontal_Cortex_BA9 | 1 | LPHN2   | 82114982 | rs17105564 | 0.9544 | 81338054 | C | T | 0.15 | 3.38E-05 | 3.27E-02 | 5.60E-02 |
| rs17105538 | Brain_Frontal_Cortex_BA9 | 1 | LPHN2   | 82114982 | rs17105567 | 0.9633 | 81338490 | A | T | 0.15 | 3.38E-05 | 2.85E-02 | 5.12E-02 |
| rs17105538 | Brain_Frontal_Cortex_BA9 | 1 | LPHN2   | 82114982 | rs17105569 | 0.9544 | 81338600 | T | A | 0.15 | 3.44E-05 | 2.85E-02 | 5.12E-02 |
| rs17105538 | Brain_Frontal_Cortex_BA9 | 1 | LPHN2   | 82114982 | rs79444150 | 0.9457 | 81339200 | A | G | 0.15 | 3.97E-05 | 2.85E-02 | 5.16E-02 |
| rs17105538 | Brain_Frontal_Cortex_BA9 | 1 | LPHN2   | 82114982 | rs17105572 | 0.9457 | 81339231 | A | G | 0.15 | 3.97E-05 | 3.69E-02 | 6.10E-02 |
| rs17105538 | Brain_Frontal_Cortex_BA9 | 1 | LPHN2   | 82114982 | rs74457604 | 0.9457 | 81339287 | T | C | 0.15 | 7.61E-05 | 2.86E-02 | 5.41E-02 |
| rs17105538 | Brain_Frontal_Cortex_BA9 | 1 | LPHN2   | 82114982 | rs75355701 | 0.9457 | 81339306 | G | A | 0.15 | 3.97E-05 | 2.92E-02 | 5.24E-02 |
| rs17105538 | Brain_Frontal_Cortex_BA9 | 1 | LPHN2   | 82114982 | rs12354210 | 0.9457 | 81339963 | G | A | 0.15 | 6.16E-05 | 3.53E-02 | 6.08E-02 |
| rs17105538 | Brain_Frontal_Cortex_BA9 | 1 | LPHN2   | 82114982 | rs11163145 | 0.9370 | 81340124 | C | T | 0.15 | 8.83E-05 | 2.92E-02 | 5.52E-02 |

|            |                    |   |         |          |            |        |          |   |   |      |          |          |          |
|------------|--------------------|---|---------|----------|------------|--------|----------|---|---|------|----------|----------|----------|
| rs17105538 | Brain_Hippocampus  | 1 | LPHN2   | 82114982 | rs1338149  | 0.8903 | 81303974 | C | T | 0.13 | 4.17E-05 | 4.70E-02 | 7.57E-02 |
| rs17105538 | Brain_Hippocampus  | 1 | LPHN2   | 82114982 | rs28520679 | 0.9907 | 81307167 | T | C | 0.14 | 2.55E-05 | 1.48E-02 | 3.47E-02 |
| rs17105538 | Brain_Hippocampus  | 1 | LPHN2   | 82114982 | rs12066728 | 0.9907 | 81307791 | C | T | 0.14 | 1.18E-05 | 1.91E-02 | 3.83E-02 |
| rs17105538 | Brain_Hippocampus  | 1 | LPHN2   | 82114982 | rs74897995 | 0.9907 | 81308276 | T | C | 0.14 | 1.18E-05 | 2.44E-02 | 4.48E-02 |
| rs17105538 | Brain_Hippocampus  | 1 | LPHN2   | 82114982 | rs11585618 | 1.0000 | 81313870 | G | C | 0.15 | 1.30E-05 | 1.91E-02 | 3.84E-02 |
| rs17105538 | Brain_Hippocampus  | 1 | LPHN2   | 82114982 | rs17105538 | 1.0000 | 81315043 | G | A | 0.15 | 7.66E-06 | 1.48E-02 | 3.23E-02 |
| rs17105538 | Brain_Hippocampus  | 1 | LPHN2   | 82114982 | rs12075367 | 0.9908 | 81316333 | A | G | 0.15 | 1.30E-05 | 1.91E-02 | 3.84E-02 |
| rs17105538 | Brain_Hippocampus  | 1 | LPHN2   | 82114982 | rs7549268  | 1.0000 | 81321890 | G | T | 0.14 | 1.40E-05 | 1.23E-02 | 2.92E-02 |
| rs17105538 | Brain_Hippocampus  | 1 | LPHN2   | 82114982 | rs76492418 | 0.9908 | 81323652 | G | A | 0.15 | 1.73E-05 | 1.48E-02 | 3.31E-02 |
| rs17105538 | Brain_Hippocampus  | 1 | LPHN2   | 82114982 | rs75125610 | 0.9544 | 81336210 | G | T | 0.15 | 3.84E-05 | 1.27E-02 | 3.12E-02 |
| rs17105538 | Brain_Hippocampus  | 1 | LPHN2   | 82114982 | rs77640848 | 0.9544 | 81336212 | C | T | 0.15 | 3.84E-05 | 1.27E-02 | 3.12E-02 |
| rs17105538 | Brain_Hippocampus  | 1 | LPHN2   | 82114982 | rs17105542 | 0.9541 | 81336283 | T | G | 0.15 | 3.56E-05 | 1.33E-02 | 3.19E-02 |
| rs17105538 | Brain_Hippocampus  | 1 | LPHN2   | 82114982 | rs11586177 | 0.9544 | 81336453 | G | A | 0.15 | 3.84E-05 | 9.26E-03 | 2.61E-02 |
| rs17105538 | Brain_Hippocampus  | 1 | LPHN2   | 82114982 | rs11576605 | 0.9544 | 81336822 | T | C | 0.15 | 3.61E-05 | 7.32E-03 | 2.30E-02 |
| rs17105538 | Brain_Hippocampus  | 1 | LPHN2   | 82114982 | rs11586583 | 0.9544 | 81336886 | C | A | 0.15 | 3.61E-05 | 6.42E-03 | 2.14E-02 |
| rs17105538 | Brain_Hippocampus  | 1 | LPHN2   | 82114982 | rs17105555 | 0.9544 | 81337489 | T | C | 0.15 | 3.93E-05 | 1.77E-02 | 3.81E-02 |
| rs17105538 | Brain_Hippocampus  | 1 | LPHN2   | 82114982 | rs17105556 | 0.9544 | 81337509 | A | C | 0.15 | 3.93E-05 | 2.41E-02 | 4.61E-02 |
| rs17105538 | Brain_Hippocampus  | 1 | LPHN2   | 82114982 | rs78184327 | 0.9544 | 81337634 | T | C | 0.15 | 3.93E-05 | 1.90E-02 | 3.98E-02 |
| rs17105538 | Brain_Hippocampus  | 1 | LPHN2   | 82114982 | rs17105560 | 0.9544 | 81337866 | A | G | 0.15 | 3.93E-05 | 1.13E-02 | 2.94E-02 |
| rs17105538 | Brain_Hippocampus  | 1 | LPHN2   | 82114982 | rs17105564 | 0.9544 | 81338054 | C | T | 0.15 | 3.38E-05 | 1.27E-02 | 3.12E-02 |
| rs17105538 | Brain_Hippocampus  | 1 | LPHN2   | 82114982 | rs17105567 | 0.9633 | 81338490 | A | T | 0.15 | 3.38E-05 | 1.27E-02 | 3.11E-02 |
| rs17105538 | Brain_Hippocampus  | 1 | LPHN2   | 82114982 | rs17105569 | 0.9544 | 81338600 | T | A | 0.15 | 3.44E-05 | 1.27E-02 | 3.12E-02 |
| rs17105538 | Brain_Hippocampus  | 1 | LPHN2   | 82114982 | rs79444150 | 0.9457 | 81339200 | A | G | 0.15 | 3.97E-05 | 1.27E-02 | 3.16E-02 |
| rs17105538 | Brain_Hippocampus  | 1 | LPHN2   | 82114982 | rs74457604 | 0.9457 | 81339287 | T | C | 0.15 | 7.61E-05 | 1.27E-02 | 3.37E-02 |
| rs17105538 | Brain_Hippocampus  | 1 | LPHN2   | 82114982 | rs75355701 | 0.9457 | 81339306 | G | A | 0.15 | 3.97E-05 | 1.27E-02 | 3.16E-02 |
| rs17105538 | Brain_Hippocampus  | 1 | LPHN2   | 82114982 | rs12354210 | 0.9457 | 81339963 | G | A | 0.15 | 6.16E-05 | 2.18E-02 | 4.50E-02 |
| rs17105538 | Brain_Hippocampus  | 1 | LPHN2   | 82114982 | rs11163145 | 0.9370 | 81340124 | C | T | 0.15 | 8.83E-05 | 1.27E-02 | 3.41E-02 |
| rs17105538 | Brain_Hypothalamus | 1 | MED28P8 | 82023161 | rs75125610 | 0.9544 | 81336210 | G | T | 0.15 | 3.84E-05 | 2.52E-02 | 4.73E-02 |
| rs17105538 | Brain_Hypothalamus | 1 | MED28P8 | 82023161 | rs77640848 | 0.9544 | 81336212 | C | T | 0.15 | 3.84E-05 | 2.52E-02 | 4.73E-02 |
| rs17105538 | Brain_Hypothalamus | 1 | MED28P8 | 82023161 | rs17105542 | 0.9541 | 81336283 | T | G | 0.15 | 3.56E-05 | 1.81E-02 | 3.83E-02 |
| rs17105538 | Brain_Hypothalamus | 1 | MED28P8 | 82023161 | rs11586177 | 0.9544 | 81336453 | G | A | 0.15 | 3.84E-05 | 2.52E-02 | 4.73E-02 |
| rs17105538 | Brain_Hypothalamus | 1 | MED28P8 | 82023161 | rs11576605 | 0.9544 | 81336822 | T | C | 0.15 | 3.61E-05 | 2.59E-02 | 4.80E-02 |
| rs17105538 | Brain_Hypothalamus | 1 | MED28P8 | 82023161 | rs11586583 | 0.9544 | 81336886 | C | A | 0.15 | 3.61E-05 | 3.94E-02 | 6.32E-02 |
| rs17105538 | Brain_Hypothalamus | 1 | MED28P8 | 82023161 | rs17105555 | 0.9544 | 81337489 | T | C | 0.15 | 3.93E-05 | 2.79E-02 | 5.06E-02 |
| rs17105538 | Brain_Hypothalamus | 1 | MED28P8 | 82023161 | rs17105556 | 0.9544 | 81337509 | A | C | 0.15 | 3.93E-05 | 2.86E-02 | 5.14E-02 |
| rs17105538 | Brain_Hypothalamus | 1 | MED28P8 | 82023161 | rs78184327 | 0.9544 | 81337634 | T | C | 0.15 | 3.93E-05 | 2.16E-02 | 4.30E-02 |
| rs17105538 | Brain_Hypothalamus | 1 | MED28P8 | 82023161 | rs17105560 | 0.9544 | 81337866 | A | G | 0.15 | 3.93E-05 | 2.99E-02 | 5.30E-02 |
| rs17105538 | Brain_Hypothalamus | 1 | MED28P8 | 82023161 | rs17105564 | 0.9544 | 81338054 | C | T | 0.15 | 3.38E-05 | 2.44E-02 | 4.62E-02 |
| rs17105538 | Brain_Hypothalamus | 1 | MED28P8 | 82023161 | rs17105567 | 0.9633 | 81338490 | A | T | 0.15 | 3.38E-05 | 2.52E-02 | 4.73E-02 |
| rs17105538 | Brain_Hypothalamus | 1 | MED28P8 | 82023161 | rs17105569 | 0.9544 | 81338600 | T | A | 0.15 | 3.44E-05 | 2.52E-02 | 4.73E-02 |



|            |                        |   |              |          |            |        |          |   |   |      |          |          |          |
|------------|------------------------|---|--------------|----------|------------|--------|----------|---|---|------|----------|----------|----------|
| rs17105538 | Brain_Hypothalamus     | 1 | MED28P8      | 82023161 | rs79444150 | 0.9457 | 81339200 | A | G | 0.15 | 3.97E-05 | 2.52E-02 | 4.77E-02 |
| rs17105538 | Brain_Hypothalamus     | 1 | MED28P8      | 82023161 | rs17105572 | 0.9457 | 81339231 | A | G | 0.15 | 3.97E-05 | 2.52E-02 | 4.77E-02 |
| rs17105538 | Brain_Hypothalamus     | 1 | MED28P8      | 82023161 | rs74457604 | 0.9457 | 81339287 | T | C | 0.15 | 7.61E-05 | 2.59E-02 | 5.09E-02 |
| rs17105538 | Brain_Hypothalamus     | 1 | MED28P8      | 82023161 | rs75355701 | 0.9457 | 81339306 | G | A | 0.15 | 3.97E-05 | 2.52E-02 | 4.77E-02 |
| rs17105538 | Brain_Hypothalamus     | 1 | MED28P8      | 82023161 | rs12354210 | 0.9457 | 81339963 | G | A | 0.15 | 6.16E-05 | 2.22E-02 | 4.56E-02 |
| rs17105538 | Brain_Hypothalamus     | 1 | MED28P8      | 82023161 | rs11163145 | 0.9370 | 81340124 | C | T | 0.15 | 8.83E-05 | 2.52E-02 | 5.05E-02 |
| rs17105538 | Brain_Hypothalamus     | 1 | MED28P8      | 82023161 | rs17402942 | 0.8366 | 81340931 | C | A | 0.12 | 9.39E-03 | 2.39E-02 | 7.64E-02 |
| rs17105538 | Brain_Substantia_nigra | 1 | LPHN2        | 82114982 | rs1338149  | 0.8903 | 81303974 | C | T | 0.13 | 4.17E-05 | 3.35E-02 | 6.10E-02 |
| rs17105538 | Brain_Substantia_nigra | 1 | LPHN2        | 82114982 | rs28520679 | 0.9907 | 81307167 | T | C | 0.14 | 2.55E-05 | 3.79E-02 | 6.24E-02 |
| rs17105538 | Brain_Substantia_nigra | 1 | LPHN2        | 82114982 | rs12066728 | 0.9907 | 81307791 | C | T | 0.14 | 1.18E-05 | 3.79E-02 | 6.01E-02 |
| rs17105538 | Brain_Substantia_nigra | 1 | LPHN2        | 82114982 | rs74897995 | 0.9907 | 81308276 | T | C | 0.14 | 1.18E-05 | 4.77E-02 | 7.06E-02 |
| rs17105538 | Brain_Substantia_nigra | 1 | LPHN2        | 82114982 | rs11585618 | 1.0000 | 81313870 | G | C | 0.15 | 1.30E-05 | 3.79E-02 | 6.03E-02 |
| rs17105538 | Brain_Substantia_nigra | 1 | LPHN2        | 82114982 | rs17105538 | 1.0000 | 81315043 | G | A | 0.15 | 7.66E-06 | 3.79E-02 | 5.98E-02 |
| rs17105538 | Brain_Substantia_nigra | 1 | LPHN2        | 82114982 | rs12075367 | 0.9908 | 81316333 | A | G | 0.15 | 1.30E-05 | 3.79E-02 | 6.03E-02 |
| rs17105538 | Brain_Substantia_nigra | 1 | LPHN2        | 82114982 | rs7549268  | 1.0000 | 81321890 | G | T | 0.14 | 1.40E-05 | 3.79E-02 | 6.00E-02 |
| rs17105538 | Brain_Substantia_nigra | 1 | LPHN2        | 82114982 | rs76492418 | 0.9908 | 81323652 | G | A | 0.15 | 1.73E-05 | 3.79E-02 | 6.06E-02 |
| rs17105538 | Brain_Substantia_nigra | 1 | LPHN2        | 82114982 | rs17105556 | 0.9544 | 81337509 | A | C | 0.15 | 3.93E-05 | 4.88E-02 | 7.36E-02 |
| rs17105538 | Whole_Blood            | 1 | RP5-837I24.1 | 81968316 | rs11586177 | 0.9544 | 81336453 | G | A | 0.15 | 3.84E-05 | 2.90E-02 | 5.18E-02 |
| rs17105538 | Whole_Blood            | 1 | RP5-837I24.1 | 81968316 | rs11576605 | 0.9544 | 81336822 | T | C | 0.15 | 3.61E-05 | 4.80E-02 | 7.25E-02 |
| rs17105538 | Whole_Blood            | 1 | RP5-837I24.1 | 81968316 | rs11586583 | 0.9544 | 81336886 | C | A | 0.15 | 3.61E-05 | 3.96E-02 | 6.35E-02 |
| rs17105538 | Whole_Blood            | 1 | RP5-837I24.1 | 81968316 | rs78184327 | 0.9544 | 81337634 | T | C | 0.15 | 3.93E-05 | 3.73E-02 | 6.12E-02 |
| rs17105538 | Whole_Blood            | 1 | RP5-837I24.1 | 81968316 | rs17105560 | 0.9544 | 81337866 | A | G | 0.15 | 3.93E-05 | 4.91E-02 | 7.39E-02 |
| rs17105538 | Whole_Blood            | 1 | RP5-837I24.1 | 81968316 | rs17105569 | 0.9544 | 81338600 | T | A | 0.15 | 3.44E-05 | 3.94E-02 | 6.34E-02 |
| rs17105538 | Whole_Blood            | 1 | RP5-837I24.1 | 81968316 | rs79444150 | 0.9457 | 81339200 | A | G | 0.15 | 3.97E-05 | 4.45E-02 | 6.93E-02 |
| rs17105538 | Whole_Blood            | 1 | RP5-837I24.1 | 81968316 | rs74457604 | 0.9457 | 81339287 | T | C | 0.15 | 7.61E-05 | 4.68E-02 | 7.42E-02 |
| rs17105538 | Whole_Blood            | 1 | RP5-837I24.1 | 81968316 | rs75355701 | 0.9457 | 81339306 | G | A | 0.15 | 3.97E-05 | 4.82E-02 | 7.33E-02 |
| rs17105538 | Whole_Blood            | 1 | RP5-837I24.1 | 81968316 | rs12354210 | 0.9457 | 81339963 | G | A | 0.15 | 6.16E-05 | 3.02E-02 | 5.50E-02 |
| rs17105538 | Whole_Blood            | 1 | RP5-837I24.1 | 81968316 | rs11163145 | 0.9370 | 81340124 | C | T | 0.15 | 8.83E-05 | 4.39E-02 | 7.16E-02 |
| rs17105538 | Whole_Blood            | 1 | RP5-837I24.1 | 81968316 | rs17402942 | 0.8366 | 81340931 | C | A | 0.12 | 9.39E-03 | 1.28E-02 | 6.05E-02 |
| rs62121100 | Brain_Amygdala         | 2 | RNASEH1      | 3599232  | rs62119802 | 0.9108 | 3065229  | C | T | 0.16 | 1.56E-05 | 3.31E-02 | 6.77E-02 |
| rs62121100 | Brain_Amygdala         | 2 | RNASEH1      | 3599232  | rs76133582 | 0.9189 | 3067000  | C | T | 0.16 | 1.56E-05 | 3.10E-02 | 6.53E-02 |
| rs62121100 | Brain_Amygdala         | 2 | RNASEH1      | 3599232  | rs62119849 | 0.9431 | 3070219  | T | C | 0.17 | 2.89E-05 | 1.65E-02 | 4.76E-02 |
| rs62121100 | Brain_Amygdala         | 2 | RNASEH1      | 3599232  | rs80199046 | 0.9431 | 3070618  | C | T | 0.17 | 2.52E-05 | 1.72E-02 | 4.85E-02 |
| rs62121100 | Brain_Amygdala         | 2 | RNASEH1      | 3599232  | rs62119850 | 0.9431 | 3070946  | C | G | 0.17 | 2.36E-05 | 1.65E-02 | 4.70E-02 |
| rs62121100 | Brain_Amygdala         | 2 | RNASEH1      | 3599232  | rs62119851 | 0.9431 | 3071496  | A | G | 0.17 | 2.36E-05 | 1.65E-02 | 4.70E-02 |
| rs62121100 | Brain_Amygdala         | 2 | RNASEH1      | 3599232  | rs62119853 | 0.9431 | 3075633  | T | C | 0.17 | 1.99E-05 | 1.65E-02 | 4.66E-02 |
| rs62121100 | Brain_Amygdala         | 2 | RNASEH1      | 3599232  | rs62119854 | 0.9431 | 3078552  | C | T | 0.17 | 2.13E-05 | 1.72E-02 | 4.80E-02 |
| rs62121100 | Brain_Amygdala         | 2 | RNASEH1      | 3599232  | rs74933641 | 0.9431 | 3079764  | T | G | 0.17 | 2.38E-05 | 1.72E-02 | 4.87E-02 |
| rs62121100 | Brain_Amygdala         | 2 | RNASEH1      | 3599232  | rs61654279 | 0.9431 | 3082049  | T | C | 0.17 | 2.53E-05 | 1.65E-02 | 4.82E-02 |
| rs62121100 | Brain_Amygdala         | 2 | RNASEH1      | 3599232  | rs62119857 | 0.9431 | 3082113  | C | G | 0.17 | 2.28E-05 | 1.65E-02 | 4.75E-02 |

|            |                                      |   |                |         |            |        |         |   |   |      |          |          |          |
|------------|--------------------------------------|---|----------------|---------|------------|--------|---------|---|---|------|----------|----------|----------|
| rs62121100 | Brain_Amygdala                       | 2 | AC108488.4     | 3581933 | rs62119858 | 0.9269 | 3082691 | A | G | 0.17 | 4.35E-05 | 3.34E-02 | 7.29E-02 |
| rs62121100 | Brain_Amygdala                       | 2 | RNASEH1        | 3599232 | rs62119858 | 0.9269 | 3082691 | A | G | 0.17 | 4.35E-05 | 2.49E-02 | 6.28E-02 |
| rs62121100 | Brain_Amygdala                       | 2 | RNASEH1        | 3599232 | rs62119859 | 1.0000 | 3084061 | A | G | 0.18 | 9.91E-06 | 2.12E-02 | 4.91E-02 |
| rs62121100 | Brain_Amygdala                       | 2 | RNASEH1        | 3599232 | rs75418685 | 1.0000 | 3084835 | T | C | 0.18 | 9.81E-06 | 2.12E-02 | 4.90E-02 |
| rs62121100 | Brain_Amygdala                       | 2 | RNASEH1        | 3599232 | rs62121061 | 0.9919 | 3085094 | C | T | 0.18 | 1.75E-05 | 2.12E-02 | 5.20E-02 |
| rs62121100 | Brain_Amygdala                       | 2 | RNASEH1        | 3599232 | rs62121062 | 0.9918 | 3087273 | C | T | 0.18 | 1.12E-05 | 1.47E-02 | 4.09E-02 |
| rs62121100 | Brain_Amygdala                       | 2 | RNASEH1        | 3599232 | rs62121098 | 1.0000 | 3092676 | G | C | 0.18 | 1.12E-05 | 2.12E-02 | 4.96E-02 |
| rs62121100 | Brain_Amygdala                       | 2 | RNASEH1        | 3599232 | rs62121099 | 1.0000 | 3092721 | C | T | 0.18 | 1.12E-05 | 2.12E-02 | 4.96E-02 |
| rs62121100 | Brain_Amygdala                       | 2 | RNASEH1        | 3599232 | rs62121100 | 1.0000 | 3093952 | G | T | 0.18 | 8.44E-06 | 1.76E-02 | 4.34E-02 |
| rs62121100 | Brain_Anterior_cingulate_cortex_BA24 | 2 | RP11-1293J14.1 | 3500929 | rs62119802 | 0.9108 | 3065229 | C | T | 0.16 | 1.56E-05 | 4.87E-02 | 8.48E-02 |
| rs62121100 | Brain_Anterior_cingulate_cortex_BA24 | 2 | SNORA73        | 3628241 | rs62119802 | 0.9108 | 3065229 | C | T | 0.16 | 1.56E-05 | 1.83E-02 | 4.95E-02 |
| rs62121100 | Brain_Anterior_cingulate_cortex_BA24 | 2 | RP11-1293J14.1 | 3500929 | rs76133582 | 0.9189 | 3067000 | C | T | 0.16 | 1.56E-05 | 4.87E-02 | 8.48E-02 |
| rs62121100 | Brain_Anterior_cingulate_cortex_BA24 | 2 | SNORA73        | 3628241 | rs76133582 | 0.9189 | 3067000 | C | T | 0.16 | 1.56E-05 | 1.83E-02 | 4.95E-02 |
| rs62121100 | Brain_Anterior_cingulate_cortex_BA24 | 2 | RP11-1293J14.1 | 3500929 | rs62119849 | 0.9431 | 3070219 | T | C | 0.17 | 2.89E-05 | 4.66E-02 | 8.33E-02 |
| rs62121100 | Brain_Anterior_cingulate_cortex_BA24 | 2 | SNORA73        | 3628241 | rs62119849 | 0.9431 | 3070219 | T | C | 0.17 | 2.89E-05 | 3.15E-02 | 6.65E-02 |
| rs62121100 | Brain_Anterior_cingulate_cortex_BA24 | 2 | TRAPPC12       | 3436155 | rs80199046 | 0.9431 | 3070618 | C | T | 0.17 | 2.52E-05 | 4.75E-02 | 8.41E-02 |
| rs62121100 | Brain_Anterior_cingulate_cortex_BA24 | 2 | RP11-1293J14.1 | 3500929 | rs80199046 | 0.9431 | 3070618 | C | T | 0.17 | 2.52E-05 | 4.26E-02 | 7.89E-02 |
| rs62121100 | Brain_Anterior_cingulate_cortex_BA24 | 2 | SNORA73        | 3628241 | rs80199046 | 0.9431 | 3070618 | C | T | 0.17 | 2.52E-05 | 2.86E-02 | 6.29E-02 |
| rs62121100 | Brain_Anterior_cingulate_cortex_BA24 | 2 | RP11-1293J14.1 | 3500929 | rs62119850 | 0.9431 | 3070946 | C | G | 0.17 | 2.36E-05 | 4.66E-02 | 8.27E-02 |
| rs62121100 | Brain_Anterior_cingulate_cortex_BA24 | 2 | SNORA73        | 3628241 | rs62119850 | 0.9431 | 3070946 | C | G | 0.17 | 2.36E-05 | 3.15E-02 | 6.59E-02 |
| rs62121100 | Brain_Anterior_cingulate_cortex_BA24 | 2 | RP11-1293J14.1 | 3500929 | rs62119851 | 0.9431 | 3071496 | A | G | 0.17 | 2.36E-05 | 4.66E-02 | 8.27E-02 |
| rs62121100 | Brain_Anterior_cingulate_cortex_BA24 | 2 | SNORA73        | 3628241 | rs62119851 | 0.9431 | 3071496 | A | G | 0.17 | 2.36E-05 | 3.15E-02 | 6.59E-02 |
| rs62121100 | Brain_Anterior_cingulate_cortex_BA24 | 2 | RP11-1293J14.1 | 3500929 | rs62119853 | 0.9431 | 3075633 | T | C | 0.17 | 1.99E-05 | 4.66E-02 | 8.23E-02 |
| rs62121100 | Brain_Anterior_cingulate_cortex_BA24 | 2 | SNORA73        | 3628241 | rs62119853 | 0.9431 | 3075633 | T | C | 0.17 | 1.99E-05 | 3.15E-02 | 6.55E-02 |
| rs62121100 | Brain_Anterior_cingulate_cortex_BA24 | 2 | TRAPPC12       | 3436155 | rs62119854 | 0.9431 | 3078552 | C | T | 0.17 | 2.13E-05 | 4.75E-02 | 8.36E-02 |
| rs62121100 | Brain_Anterior_cingulate_cortex_BA24 | 2 | RP11-1293J14.1 | 3500929 | rs62119854 | 0.9431 | 3078552 | C | T | 0.17 | 2.13E-05 | 4.26E-02 | 7.84E-02 |
| rs62121100 | Brain_Anterior_cingulate_cortex_BA24 | 2 | SNORA73        | 3628241 | rs62119854 | 0.9431 | 3078552 | C | T | 0.17 | 2.13E-05 | 2.86E-02 | 6.25E-02 |
| rs62121100 | Brain_Anterior_cingulate_cortex_BA24 | 2 | TRAPPC12       | 3436155 | rs74933641 | 0.9431 | 3079764 | T | G | 0.17 | 2.38E-05 | 4.75E-02 | 8.43E-02 |
| rs62121100 | Brain_Anterior_cingulate_cortex_BA24 | 2 | RP11-1293J14.1 | 3500929 | rs74933641 | 0.9431 | 3079764 | T | G | 0.17 | 2.38E-05 | 4.26E-02 | 7.91E-02 |
| rs62121100 | Brain_Anterior_cingulate_cortex_BA24 | 2 | SNORA73        | 3628241 | rs74933641 | 0.9431 | 3079764 | T | G | 0.17 | 2.38E-05 | 2.86E-02 | 6.32E-02 |
| rs62121100 | Brain_Anterior_cingulate_cortex_BA24 | 2 | RP11-1293J14.1 | 3500929 | rs61654279 | 0.9431 | 3082049 | T | C | 0.17 | 2.53E-05 | 4.66E-02 | 8.40E-02 |
| rs62121100 | Brain_Anterior_cingulate_cortex_BA24 | 2 | SNORA73        | 3628241 | rs61654279 | 0.9431 | 3082049 | T | C | 0.17 | 2.53E-05 | 3.15E-02 | 6.72E-02 |
| rs62121100 | Brain_Anterior_cingulate_cortex_BA24 | 2 | RP11-1293J14.1 | 3500929 | rs62119857 | 0.9431 | 3082113 | C | G | 0.17 | 2.28E-05 | 4.66E-02 | 8.33E-02 |
| rs62121100 | Brain_Anterior_cingulate_cortex_BA24 | 2 | SNORA73        | 3628241 | rs62119857 | 0.9431 | 3082113 | C | G | 0.17 | 2.28E-05 | 3.15E-02 | 6.65E-02 |
| rs62121100 | Brain_Anterior_cingulate_cortex_BA24 | 2 | TRAPPC12       | 3436155 | rs62119859 | 1.0000 | 3084061 | A | G | 0.18 | 9.91E-06 | 4.89E-02 | 8.06E-02 |
| rs62121100 | Brain_Anterior_cingulate_cortex_BA24 | 2 | RP11-1293J14.1 | 3500929 | rs62119859 | 1.0000 | 3084061 | A | G | 0.18 | 9.91E-06 | 3.77E-02 | 6.85E-02 |
| rs62121100 | Brain_Caudate_basal_ganglia          | 2 | RP11-1293J14.1 | 3500929 | rs62119849 | 0.9431 | 3070219 | T | C | 0.17 | 2.89E-05 | 4.88E-02 | 8.56E-02 |
| rs62121100 | Brain_Caudate_basal_ganglia          | 2 | RP11-1293J14.1 | 3500929 | rs62119850 | 0.9431 | 3070946 | C | G | 0.17 | 2.36E-05 | 4.88E-02 | 8.50E-02 |
| rs62121100 | Brain_Caudate_basal_ganglia          | 2 | RP11-1293J14.1 | 3500929 | rs62119851 | 0.9431 | 3071496 | A | G | 0.17 | 2.36E-05 | 4.88E-02 | 8.50E-02 |
| rs62121100 | Brain_Caudate_basal_ganglia          | 2 | RP11-1293J14.1 | 3500929 | rs62119853 | 0.9431 | 3075633 | T | C | 0.17 | 1.99E-05 | 4.88E-02 | 8.45E-02 |

|            |                             |   |                |         |            |        |         |   |   |      |          |          |          |
|------------|-----------------------------|---|----------------|---------|------------|--------|---------|---|---|------|----------|----------|----------|
| rs62121100 | Brain_Caudate_basal_ganglia | 2 | RP11-1293J14.1 | 3500929 | rs61654279 | 0.9431 | 3082049 | T | C | 0.17 | 2.53E-05 | 4.88E-02 | 8.62E-02 |
| rs62121100 | Brain_Caudate_basal_ganglia | 2 | RP11-1293J14.1 | 3500929 | rs62119857 | 0.9431 | 3082113 | C | G | 0.17 | 2.28E-05 | 4.88E-02 | 8.55E-02 |
| rs62121100 | Brain_Cerebellar_Hemisphere | 2 | ALLC           | 3727979 | rs62119802 | 0.9108 | 3065229 | C | T | 0.16 | 1.56E-05 | 7.43E-03 | 3.26E-02 |
| rs62121100 | Brain_Cerebellar_Hemisphere | 2 | ALLC           | 3727979 | rs76133582 | 0.9189 | 3067000 | C | T | 0.16 | 1.56E-05 | 7.43E-03 | 3.26E-02 |
| rs62121100 | Brain_Cerebellar_Hemisphere | 2 | ALLC           | 3727979 | rs62119849 | 0.9431 | 3070219 | T | C | 0.17 | 2.89E-05 | 2.13E-02 | 5.40E-02 |
| rs62121100 | Brain_Cerebellar_Hemisphere | 2 | ALLC           | 3727979 | rs80199046 | 0.9431 | 3070618 | C | T | 0.17 | 2.52E-05 | 2.13E-02 | 5.39E-02 |
| rs62121100 | Brain_Cerebellar_Hemisphere | 2 | ALLC           | 3727979 | rs62119850 | 0.9431 | 3070946 | C | G | 0.17 | 2.36E-05 | 2.13E-02 | 5.35E-02 |
| rs62121100 | Brain_Cerebellar_Hemisphere | 2 | ALLC           | 3727979 | rs62119851 | 0.9431 | 3071496 | A | G | 0.17 | 2.36E-05 | 2.13E-02 | 5.35E-02 |
| rs62121100 | Brain_Cerebellar_Hemisphere | 2 | ALLC           | 3727979 | rs62119853 | 0.9431 | 3075633 | T | C | 0.17 | 1.99E-05 | 2.13E-02 | 5.30E-02 |
| rs62121100 | Brain_Cerebellar_Hemisphere | 2 | ALLC           | 3727979 | rs62119854 | 0.9431 | 3078552 | C | T | 0.17 | 2.13E-05 | 2.13E-02 | 5.34E-02 |
| rs62121100 | Brain_Cerebellar_Hemisphere | 2 | ALLC           | 3727979 | rs74933641 | 0.9431 | 3079764 | T | G | 0.17 | 2.38E-05 | 2.13E-02 | 5.41E-02 |
| rs62121100 | Brain_Cerebellar_Hemisphere | 2 | ALLC           | 3727979 | rs61654279 | 0.9431 | 3082049 | T | C | 0.17 | 2.53E-05 | 2.13E-02 | 5.47E-02 |
| rs62121100 | Brain_Cerebellar_Hemisphere | 2 | ALLC           | 3727979 | rs62119857 | 0.9431 | 3082113 | C | G | 0.17 | 2.28E-05 | 2.13E-02 | 5.40E-02 |
| rs62121100 | Brain_Cerebellar_Hemisphere | 2 | ALLC           | 3727979 | rs62119858 | 0.9269 | 3082691 | A | G | 0.17 | 4.35E-05 | 2.15E-02 | 5.84E-02 |
| rs62121100 | Brain_Cerebellar_Hemisphere | 2 | RNASEH1        | 3599232 | rs62119859 | 1.0000 | 3084061 | A | G | 0.18 | 9.91E-06 | 4.57E-02 | 7.72E-02 |
| rs62121100 | Brain_Cerebellar_Hemisphere | 2 | ALLC           | 3727979 | rs62119859 | 1.0000 | 3084061 | A | G | 0.18 | 9.91E-06 | 3.58E-02 | 6.64E-02 |
| rs62121100 | Brain_Cerebellar_Hemisphere | 2 | RNASEH1        | 3599232 | rs75418685 | 1.0000 | 3084835 | T | C | 0.18 | 9.81E-06 | 4.98E-02 | 8.16E-02 |
| rs62121100 | Brain_Cerebellar_Hemisphere | 2 | ALLC           | 3727979 | rs75418685 | 1.0000 | 3084835 | T | C | 0.18 | 9.81E-06 | 4.90E-02 | 8.07E-02 |
| rs62121100 | Brain_Cerebellar_Hemisphere | 2 | RNASEH1        | 3599232 | rs62121061 | 0.9919 | 3085094 | C | T | 0.18 | 1.75E-05 | 4.98E-02 | 8.47E-02 |
| rs62121100 | Brain_Cerebellar_Hemisphere | 2 | ALLC           | 3727979 | rs62121061 | 0.9919 | 3085094 | C | T | 0.18 | 1.75E-05 | 4.90E-02 | 8.38E-02 |
| rs62121100 | Brain_Cerebellar_Hemisphere | 2 | ALLC           | 3727979 | rs62121062 | 0.9918 | 3087273 | C | T | 0.18 | 1.12E-05 | 3.80E-02 | 6.94E-02 |
| rs62121100 | Brain_Cerebellar_Hemisphere | 2 | RNASEH1        | 3599232 | rs62121098 | 1.0000 | 3092676 | G | C | 0.18 | 1.12E-05 | 4.98E-02 | 8.22E-02 |
| rs62121100 | Brain_Cerebellar_Hemisphere | 2 | ALLC           | 3727979 | rs62121098 | 1.0000 | 3092676 | G | C | 0.18 | 1.12E-05 | 4.90E-02 | 8.13E-02 |
| rs62121100 | Brain_Cerebellar_Hemisphere | 2 | RNASEH1        | 3599232 | rs62121099 | 1.0000 | 3092721 | C | T | 0.18 | 1.12E-05 | 4.98E-02 | 8.22E-02 |
| rs62121100 | Brain_Cerebellar_Hemisphere | 2 | ALLC           | 3727979 | rs62121099 | 1.0000 | 3092721 | C | T | 0.18 | 1.12E-05 | 4.90E-02 | 8.13E-02 |
| rs62121100 | Brain_Cerebellar_Hemisphere | 2 | RNASEH1        | 3599232 | rs62121100 | 1.0000 | 3093952 | G | T | 0.18 | 8.44E-06 | 4.98E-02 | 8.07E-02 |
| rs62121100 | Brain_Cerebellar_Hemisphere | 2 | ALLC           | 3727979 | rs62121100 | 1.0000 | 3093952 | G | T | 0.18 | 8.44E-06 | 4.90E-02 | 7.98E-02 |
| rs62121100 | Brain_Cerebellum            | 2 | RP11-1293J14.1 | 3500929 | rs62119802 | 0.9108 | 3065229 | C | T | 0.16 | 1.56E-05 | 7.13E-03 | 3.20E-02 |
| rs62121100 | Brain_Cerebellum            | 2 | RP11-1293J14.1 | 3500929 | rs76133582 | 0.9189 | 3067000 | C | T | 0.16 | 1.56E-05 | 5.62E-03 | 2.90E-02 |
| rs62121100 | Brain_Cerebellum            | 2 | RP11-1293J14.1 | 3500929 | rs62119849 | 0.9431 | 3070219 | T | C | 0.17 | 2.89E-05 | 7.13E-03 | 3.26E-02 |
| rs62121100 | Brain_Cerebellum            | 2 | RP11-1293J14.1 | 3500929 | rs80199046 | 0.9431 | 3070618 | C | T | 0.17 | 2.52E-05 | 1.85E-02 | 5.02E-02 |
| rs62121100 | Brain_Cerebellum            | 2 | RP11-1293J14.1 | 3500929 | rs62119850 | 0.9431 | 3070946 | C | G | 0.17 | 2.36E-05 | 7.13E-03 | 3.21E-02 |
| rs62121100 | Brain_Cerebellum            | 2 | RP11-1293J14.1 | 3500929 | rs62119851 | 0.9431 | 3071496 | A | G | 0.17 | 2.36E-05 | 7.13E-03 | 3.21E-02 |
| rs62121100 | Brain_Cerebellum            | 2 | RP11-1293J14.1 | 3500929 | rs62119853 | 0.9431 | 3075633 | T | C | 0.17 | 1.99E-05 | 7.13E-03 | 3.17E-02 |
| rs62121100 | Brain_Cerebellum            | 2 | RP11-1293J14.1 | 3500929 | rs62119854 | 0.9431 | 3078552 | C | T | 0.17 | 2.13E-05 | 1.54E-02 | 4.54E-02 |
| rs62121100 | Brain_Cerebellum            | 2 | RP11-1293J14.1 | 3500929 | rs74933641 | 0.9431 | 3079764 | T | G | 0.17 | 2.38E-05 | 1.54E-02 | 4.61E-02 |
| rs62121100 | Brain_Cerebellum            | 2 | RP11-1293J14.1 | 3500929 | rs61654279 | 0.9431 | 3082049 | T | C | 0.17 | 2.53E-05 | 5.11E-03 | 2.90E-02 |
| rs62121100 | Brain_Cerebellum            | 2 | RP11-1293J14.1 | 3500929 | rs62119857 | 0.9431 | 3082113 | C | G | 0.17 | 2.28E-05 | 5.11E-03 | 2.84E-02 |
| rs62121100 | Brain_Cerebellum            | 2 | RP11-1293J14.1 | 3500929 | rs62119858 | 0.9269 | 3082691 | A | G | 0.17 | 4.35E-05 | 2.51E-02 | 6.29E-02 |
| rs62121100 | Brain_Cerebellum            | 2 | RP11-1293J14.1 | 3500929 | rs62119859 | 1.0000 | 3084061 | A | G | 0.18 | 9.91E-06 | 6.24E-03 | 2.66E-02 |

|            |                  |   |                |         |            |        |         |   |   |      |          |          |          |
|------------|------------------|---|----------------|---------|------------|--------|---------|---|---|------|----------|----------|----------|
| rs62121100 | Brain_Cerebellum | 2 | AC108488.4     | 3581933 | rs62119859 | 1.0000 | 3084061 | A | G | 0.18 | 9.91E-06 | 2.63E-02 | 5.54E-02 |
| rs62121100 | Brain_Cerebellum | 2 | RP11-1293J14.1 | 3500929 | rs75418685 | 1.0000 | 3084835 | T | C | 0.18 | 9.81E-06 | 8.83E-03 | 3.13E-02 |
| rs62121100 | Brain_Cerebellum | 2 | RP11-1293J14.1 | 3500929 | rs62121061 | 0.9919 | 3085094 | C | T | 0.18 | 1.75E-05 | 1.43E-02 | 4.25E-02 |
| rs62121100 | Brain_Cerebellum | 2 | RP11-1293J14.1 | 3500929 | rs62121062 | 0.9918 | 3087273 | C | T | 0.18 | 1.12E-05 | 8.83E-03 | 3.18E-02 |
| rs62121100 | Brain_Cerebellum | 2 | RP11-1293J14.1 | 3500929 | rs62121098 | 1.0000 | 3092676 | G | C | 0.18 | 1.12E-05 | 8.83E-03 | 3.18E-02 |
| rs62121100 | Brain_Cerebellum | 2 | RP11-1293J14.1 | 3500929 | rs62121099 | 1.0000 | 3092721 | C | T | 0.18 | 1.12E-05 | 8.83E-03 | 3.18E-02 |
| rs62121100 | Brain_Cerebellum | 2 | RP11-1293J14.1 | 3500929 | rs62121100 | 1.0000 | 3093952 | G | T | 0.18 | 8.44E-06 | 8.66E-03 | 3.03E-02 |
| rs62121100 | Brain_Cortex     | 2 | TSSC1          | 3287174 | rs62119802 | 0.9108 | 3065229 | C | T | 0.16 | 1.56E-05 | 4.91E-02 | 8.53E-02 |
| rs62121100 | Brain_Cortex     | 2 | RPS7           | 3625652 | rs62119802 | 0.9108 | 3065229 | C | T | 0.16 | 1.56E-05 | 5.49E-03 | 2.88E-02 |
| rs62121100 | Brain_Cortex     | 2 | TSSC1          | 3287174 | rs76133582 | 0.9189 | 3067000 | C | T | 0.16 | 1.56E-05 | 3.78E-02 | 7.31E-02 |
| rs62121100 | Brain_Cortex     | 2 | RPS7           | 3625652 | rs76133582 | 0.9189 | 3067000 | C | T | 0.16 | 1.56E-05 | 6.42E-03 | 3.07E-02 |
| rs62121100 | Brain_Cortex     | 2 | TSSC1          | 3287174 | rs62119849 | 0.9431 | 3070219 | T | C | 0.17 | 2.89E-05 | 4.91E-02 | 8.59E-02 |
| rs62121100 | Brain_Cortex     | 2 | RPS7           | 3625652 | rs62119849 | 0.9431 | 3070219 | T | C | 0.17 | 2.89E-05 | 5.49E-03 | 2.93E-02 |
| rs62121100 | Brain_Cortex     | 2 | TSSC1          | 3287174 | rs80199046 | 0.9431 | 3070618 | C | T | 0.17 | 2.52E-05 | 4.66E-02 | 8.32E-02 |
| rs62121100 | Brain_Cortex     | 2 | RPS7           | 3625652 | rs80199046 | 0.9431 | 3070618 | C | T | 0.17 | 2.52E-05 | 2.26E-03 | 2.10E-02 |
| rs62121100 | Brain_Cortex     | 2 | TSSC1          | 3287174 | rs62119850 | 0.9431 | 3070946 | C | G | 0.17 | 2.36E-05 | 4.91E-02 | 8.53E-02 |
| rs62121100 | Brain_Cortex     | 2 | RPS7           | 3625652 | rs62119850 | 0.9431 | 3070946 | C | G | 0.17 | 2.36E-05 | 5.49E-03 | 2.88E-02 |
| rs62121100 | Brain_Cortex     | 2 | TSSC1          | 3287174 | rs62119851 | 0.9431 | 3071496 | A | G | 0.17 | 2.36E-05 | 4.91E-02 | 8.53E-02 |
| rs62121100 | Brain_Cortex     | 2 | RPS7           | 3625652 | rs62119851 | 0.9431 | 3071496 | A | G | 0.17 | 2.36E-05 | 5.49E-03 | 2.88E-02 |
| rs62121100 | Brain_Cortex     | 2 | TSSC1          | 3287174 | rs62119853 | 0.9431 | 3075633 | T | C | 0.17 | 1.99E-05 | 4.91E-02 | 8.48E-02 |
| rs62121100 | Brain_Cortex     | 2 | RPS7           | 3625652 | rs62119853 | 0.9431 | 3075633 | T | C | 0.17 | 1.99E-05 | 5.49E-03 | 2.84E-02 |
| rs62121100 | Brain_Cortex     | 2 | TSSC1          | 3287174 | rs62119854 | 0.9431 | 3078552 | C | T | 0.17 | 2.13E-05 | 4.66E-02 | 8.27E-02 |
| rs62121100 | Brain_Cortex     | 2 | RPS7           | 3625652 | rs62119854 | 0.9431 | 3078552 | C | T | 0.17 | 2.13E-05 | 2.26E-03 | 2.07E-02 |
| rs62121100 | Brain_Cortex     | 2 | TSSC1          | 3287174 | rs74933641 | 0.9431 | 3079764 | T | G | 0.17 | 2.38E-05 | 4.66E-02 | 8.34E-02 |
| rs62121100 | Brain_Cortex     | 2 | RPS7           | 3625652 | rs74933641 | 0.9431 | 3079764 | T | G | 0.17 | 2.38E-05 | 2.26E-03 | 2.12E-02 |
| rs62121100 | Brain_Cortex     | 2 | RPS7           | 3625652 | rs61654279 | 0.9431 | 3082049 | T | C | 0.17 | 2.53E-05 | 6.24E-03 | 3.14E-02 |
| rs62121100 | Brain_Cortex     | 2 | RPS7           | 3625652 | rs62119857 | 0.9431 | 3082113 | C | G | 0.17 | 2.28E-05 | 6.24E-03 | 3.08E-02 |
| rs62121100 | Brain_Cortex     | 2 | RPS7           | 3625652 | rs62119858 | 0.9269 | 3082691 | A | G | 0.17 | 4.35E-05 | 1.04E-02 | 4.22E-02 |
| rs62121100 | Brain_Cortex     | 2 | RPS7           | 3625652 | rs62119859 | 1.0000 | 3084061 | A | G | 0.18 | 9.91E-06 | 4.29E-03 | 2.26E-02 |
| rs62121100 | Brain_Cortex     | 2 | TSSC1          | 3287174 | rs75418685 | 1.0000 | 3084835 | T | C | 0.18 | 9.81E-06 | 4.91E-02 | 8.08E-02 |
| rs62121100 | Brain_Cortex     | 2 | RPS7           | 3625652 | rs75418685 | 1.0000 | 3084835 | T | C | 0.18 | 9.81E-06 | 5.49E-03 | 2.51E-02 |
| rs62121100 | Brain_Cortex     | 2 | TSSC1          | 3287174 | rs62121061 | 0.9919 | 3085094 | C | T | 0.18 | 1.75E-05 | 4.52E-02 | 7.98E-02 |
| rs62121100 | Brain_Cortex     | 2 | RPS7           | 3625652 | rs62121061 | 0.9919 | 3085094 | C | T | 0.18 | 1.75E-05 | 2.39E-03 | 2.00E-02 |
| rs62121100 | Brain_Cortex     | 2 | RPS7           | 3625652 | rs62121062 | 0.9918 | 3087273 | C | T | 0.18 | 1.12E-05 | 8.32E-03 | 3.09E-02 |
| rs62121100 | Brain_Cortex     | 2 | TSSC1          | 3287174 | rs62121098 | 1.0000 | 3092676 | G | C | 0.18 | 1.12E-05 | 4.66E-02 | 7.87E-02 |
| rs62121100 | Brain_Cortex     | 2 | RPS7           | 3625652 | rs62121098 | 1.0000 | 3092676 | G | C | 0.18 | 1.12E-05 | 5.90E-03 | 2.65E-02 |
| rs62121100 | Brain_Cortex     | 2 | TSSC1          | 3287174 | rs62121099 | 1.0000 | 3092721 | C | T | 0.18 | 1.12E-05 | 4.91E-02 | 8.14E-02 |
| rs62121100 | Brain_Cortex     | 2 | RPS7           | 3625652 | rs62121099 | 1.0000 | 3092721 | C | T | 0.18 | 1.12E-05 | 5.49E-03 | 2.56E-02 |
| rs62121100 | Brain_Cortex     | 2 | TSSC1          | 3287174 | rs62121100 | 1.0000 | 3093952 | G | T | 0.18 | 8.44E-06 | 3.99E-02 | 7.00E-02 |
| rs62121100 | Brain_Cortex     | 2 | RPS7           | 3625652 | rs62121100 | 1.0000 | 3093952 | G | T | 0.18 | 8.44E-06 | 7.25E-03 | 2.78E-02 |

|            |                          |   |                |         |            |        |         |   |   |      |          |          |          |
|------------|--------------------------|---|----------------|---------|------------|--------|---------|---|---|------|----------|----------|----------|
| rs62121100 | Brain_Frontal_Cortex_BA9 | 2 | TRAPPC12       | 3436155 | rs62119802 | 0.9108 | 3065229 | C | T | 0.16 | 1.56E-05 | 1.49E-02 | 4.47E-02 |
| rs62121100 | Brain_Frontal_Cortex_BA9 | 2 | TRAPPC12       | 3436155 | rs76133582 | 0.9189 | 3067000 | C | T | 0.16 | 1.56E-05 | 1.10E-02 | 3.88E-02 |
| rs62121100 | Brain_Frontal_Cortex_BA9 | 2 | TRAPPC12       | 3436155 | rs62119849 | 0.9431 | 3070219 | T | C | 0.17 | 2.89E-05 | 3.58E-02 | 7.15E-02 |
| rs62121100 | Brain_Frontal_Cortex_BA9 | 2 | TRAPPC12       | 3436155 | rs80199046 | 0.9431 | 3070618 | C | T | 0.17 | 2.52E-05 | 4.79E-02 | 8.45E-02 |
| rs62121100 | Brain_Frontal_Cortex_BA9 | 2 | TRAPPC12       | 3436155 | rs62119850 | 0.9431 | 3070946 | C | G | 0.17 | 2.36E-05 | 3.58E-02 | 7.09E-02 |
| rs62121100 | Brain_Frontal_Cortex_BA9 | 2 | TRAPPC12       | 3436155 | rs62119851 | 0.9431 | 3071496 | A | G | 0.17 | 2.36E-05 | 3.58E-02 | 7.09E-02 |
| rs62121100 | Brain_Frontal_Cortex_BA9 | 2 | TRAPPC12       | 3436155 | rs62119853 | 0.9431 | 3075633 | T | C | 0.17 | 1.99E-05 | 3.58E-02 | 7.04E-02 |
| rs62121100 | Brain_Frontal_Cortex_BA9 | 2 | TRAPPC12       | 3436155 | rs62119854 | 0.9431 | 3078552 | C | T | 0.17 | 2.13E-05 | 4.79E-02 | 8.40E-02 |
| rs62121100 | Brain_Frontal_Cortex_BA9 | 2 | TRAPPC12       | 3436155 | rs74933641 | 0.9431 | 3079764 | T | G | 0.17 | 2.38E-05 | 4.79E-02 | 8.48E-02 |
| rs62121100 | Brain_Frontal_Cortex_BA9 | 2 | TRAPPC12       | 3436155 | rs61654279 | 0.9431 | 3082049 | T | C | 0.17 | 2.53E-05 | 3.58E-02 | 7.21E-02 |
| rs62121100 | Brain_Frontal_Cortex_BA9 | 2 | TRAPPC12       | 3436155 | rs62119857 | 0.9431 | 3082113 | C | G | 0.17 | 2.28E-05 | 3.58E-02 | 7.14E-02 |
| rs62121100 | Brain_Frontal_Cortex_BA9 | 2 | TRAPPC12       | 3436155 | rs62119858 | 0.9269 | 3082691 | A | G | 0.17 | 4.35E-05 | 2.07E-02 | 5.74E-02 |
| rs62121100 | Brain_Frontal_Cortex_BA9 | 2 | TRAPPC12       | 3436155 | rs75418685 | 1.0000 | 3084835 | T | C | 0.18 | 9.81E-06 | 3.65E-02 | 6.72E-02 |
| rs62121100 | Brain_Frontal_Cortex_BA9 | 2 | TRAPPC12       | 3436155 | rs62121061 | 0.9919 | 3085094 | C | T | 0.18 | 1.75E-05 | 3.65E-02 | 7.03E-02 |
| rs62121100 | Brain_Frontal_Cortex_BA9 | 2 | TRAPPC12       | 3436155 | rs62121062 | 0.9918 | 3087273 | C | T | 0.18 | 1.12E-05 | 3.65E-02 | 6.78E-02 |
| rs62121100 | Brain_Frontal_Cortex_BA9 | 2 | TRAPPC12       | 3436155 | rs62121098 | 1.0000 | 3092676 | G | C | 0.18 | 1.12E-05 | 3.65E-02 | 6.78E-02 |
| rs62121100 | Brain_Frontal_Cortex_BA9 | 2 | TRAPPC12       | 3436155 | rs62121099 | 1.0000 | 3092721 | C | T | 0.18 | 1.12E-05 | 3.65E-02 | 6.78E-02 |
| rs62121100 | Brain_Frontal_Cortex_BA9 | 2 | TRAPPC12       | 3436155 | rs62121100 | 1.0000 | 3093952 | G | T | 0.18 | 8.44E-06 | 2.53E-02 | 5.32E-02 |
| rs62121100 | Brain_Hippocampus        | 2 | MYT1L          | 2063958 | rs62119802 | 0.9108 | 3065229 | C | T | 0.16 | 1.56E-05 | 4.49E-02 | 8.08E-02 |
| rs62121100 | Brain_Hippocampus        | 2 | RP11-1293J14.1 | 3500929 | rs62119802 | 0.9108 | 3065229 | C | T | 0.16 | 1.56E-05 | 1.42E-02 | 4.37E-02 |
| rs62121100 | Brain_Hippocampus        | 2 | RP11-1293J14.1 | 3500929 | rs76133582 | 0.9189 | 3067000 | C | T | 0.16 | 1.56E-05 | 2.06E-02 | 5.25E-02 |
| rs62121100 | Brain_Hippocampus        | 2 | MYT1L          | 2063958 | rs62119849 | 0.9431 | 3070219 | T | C | 0.17 | 2.89E-05 | 4.49E-02 | 8.15E-02 |
| rs62121100 | Brain_Hippocampus        | 2 | RP11-1293J14.1 | 3500929 | rs62119849 | 0.9431 | 3070219 | T | C | 0.17 | 2.89E-05 | 1.42E-02 | 4.43E-02 |
| rs62121100 | Brain_Hippocampus        | 2 | RP11-1293J14.1 | 3500929 | rs80199046 | 0.9431 | 3070618 | C | T | 0.17 | 2.52E-05 | 1.67E-02 | 4.77E-02 |
| rs62121100 | Brain_Hippocampus        | 2 | RNASEH1        | 3599232 | rs80199046 | 0.9431 | 3070618 | C | T | 0.17 | 2.52E-05 | 3.84E-02 | 7.42E-02 |
| rs62121100 | Brain_Hippocampus        | 2 | AC108488.3     | 3607765 | rs80199046 | 0.9431 | 3070618 | C | T | 0.17 | 2.52E-05 | 4.10E-02 | 7.71E-02 |
| rs62121100 | Brain_Hippocampus        | 2 | MYT1L          | 2063958 | rs62119850 | 0.9431 | 3070946 | C | G | 0.17 | 2.36E-05 | 4.49E-02 | 8.09E-02 |
| rs62121100 | Brain_Hippocampus        | 2 | RP11-1293J14.1 | 3500929 | rs62119850 | 0.9431 | 3070946 | C | G | 0.17 | 2.36E-05 | 1.42E-02 | 4.38E-02 |
| rs62121100 | Brain_Hippocampus        | 2 | MYT1L          | 2063958 | rs62119851 | 0.9431 | 3071496 | A | G | 0.17 | 2.36E-05 | 4.49E-02 | 8.09E-02 |
| rs62121100 | Brain_Hippocampus        | 2 | RP11-1293J14.1 | 3500929 | rs62119851 | 0.9431 | 3071496 | A | G | 0.17 | 2.36E-05 | 1.42E-02 | 4.38E-02 |
| rs62121100 | Brain_Hippocampus        | 2 | MYT1L          | 2063958 | rs62119853 | 0.9431 | 3075633 | T | C | 0.17 | 1.99E-05 | 4.49E-02 | 8.04E-02 |
| rs62121100 | Brain_Hippocampus        | 2 | RP11-1293J14.1 | 3500929 | rs62119853 | 0.9431 | 3075633 | T | C | 0.17 | 1.99E-05 | 1.42E-02 | 4.33E-02 |
| rs62121100 | Brain_Hippocampus        | 2 | RP11-1293J14.1 | 3500929 | rs62119854 | 0.9431 | 3078552 | C | T | 0.17 | 2.13E-05 | 1.67E-02 | 4.72E-02 |
| rs62121100 | Brain_Hippocampus        | 2 | RNASEH1        | 3599232 | rs62119854 | 0.9431 | 3078552 | C | T | 0.17 | 2.13E-05 | 3.84E-02 | 7.37E-02 |
| rs62121100 | Brain_Hippocampus        | 2 | AC108488.3     | 3607765 | rs62119854 | 0.9431 | 3078552 | C | T | 0.17 | 2.13E-05 | 4.10E-02 | 7.66E-02 |
| rs62121100 | Brain_Hippocampus        | 2 | RP11-1293J14.1 | 3500929 | rs74933641 | 0.9431 | 3079764 | T | G | 0.17 | 2.38E-05 | 1.67E-02 | 4.79E-02 |
| rs62121100 | Brain_Hippocampus        | 2 | RNASEH1        | 3599232 | rs74933641 | 0.9431 | 3079764 | T | G | 0.17 | 2.38E-05 | 3.84E-02 | 7.44E-02 |
| rs62121100 | Brain_Hippocampus        | 2 | AC108488.3     | 3607765 | rs74933641 | 0.9431 | 3079764 | T | G | 0.17 | 2.38E-05 | 4.10E-02 | 7.73E-02 |
| rs62121100 | Brain_Hippocampus        | 2 | MYT1L          | 2063958 | rs61654279 | 0.9431 | 3082049 | T | C | 0.17 | 2.53E-05 | 4.49E-02 | 8.21E-02 |
| rs62121100 | Brain_Hippocampus        | 2 | RP11-1293J14.1 | 3500929 | rs61654279 | 0.9431 | 3082049 | T | C | 0.17 | 2.53E-05 | 1.42E-02 | 4.49E-02 |

|            |                                       |   |                |         |            |        |         |   |   |      |          |          |          |
|------------|---------------------------------------|---|----------------|---------|------------|--------|---------|---|---|------|----------|----------|----------|
| rs62121100 | Brain_Hippocampus                     | 2 | MYT1L          | 2063958 | rs62119857 | 0.9431 | 3082113 | C | G | 0.17 | 2.28E-05 | 4.49E-02 | 8.14E-02 |
| rs62121100 | Brain_Hippocampus                     | 2 | RP11-1293J14.1 | 3500929 | rs62119857 | 0.9431 | 3082113 | C | G | 0.17 | 2.28E-05 | 1.42E-02 | 4.43E-02 |
| rs62121100 | Brain_Hippocampus                     | 2 | MYT1L          | 2063958 | rs62119858 | 0.9269 | 3082691 | A | G | 0.17 | 4.35E-05 | 4.04E-02 | 8.07E-02 |
| rs62121100 | Brain_Hippocampus                     | 2 | RP11-1293J14.1 | 3500929 | rs62119858 | 0.9269 | 3082691 | A | G | 0.17 | 4.35E-05 | 3.78E-02 | 7.78E-02 |
| rs62121100 | Brain_Hippocampus                     | 2 | MYT1L          | 2063958 | rs62119859 | 1.0000 | 3084061 | A | G | 0.18 | 9.91E-06 | 2.32E-02 | 5.16E-02 |
| rs62121100 | Brain_Hippocampus                     | 2 | RP11-1293J14.1 | 3500929 | rs62119859 | 1.0000 | 3084061 | A | G | 0.18 | 9.91E-06 | 1.71E-02 | 4.37E-02 |
| rs62121100 | Brain_Hippocampus                     | 2 | MYT1L          | 2063958 | rs75418685 | 1.0000 | 3084835 | T | C | 0.18 | 9.81E-06 | 3.72E-02 | 6.79E-02 |
| rs62121100 | Brain_Hippocampus                     | 2 | RP11-1293J14.1 | 3500929 | rs75418685 | 1.0000 | 3084835 | T | C | 0.18 | 9.81E-06 | 1.76E-02 | 4.43E-02 |
| rs62121100 | Brain_Hippocampus                     | 2 | MYT1L          | 2063958 | rs62121061 | 0.9919 | 3085094 | C | T | 0.18 | 1.75E-05 | 3.72E-02 | 7.10E-02 |
| rs62121100 | Brain_Hippocampus                     | 2 | RP11-1293J14.1 | 3500929 | rs62121061 | 0.9919 | 3085094 | C | T | 0.18 | 1.75E-05 | 1.76E-02 | 4.72E-02 |
| rs62121100 | Brain_Hippocampus                     | 2 | MYT1L          | 2063958 | rs62121062 | 0.9918 | 3087273 | C | T | 0.18 | 1.12E-05 | 4.48E-02 | 7.68E-02 |
| rs62121100 | Brain_Hippocampus                     | 2 | RP11-1293J14.1 | 3500929 | rs62121062 | 0.9918 | 3087273 | C | T | 0.18 | 1.12E-05 | 1.51E-02 | 4.14E-02 |
| rs62121100 | Brain_Hippocampus                     | 2 | MYT1L          | 2063958 | rs62121098 | 1.0000 | 3092676 | G | C | 0.18 | 1.12E-05 | 3.72E-02 | 6.85E-02 |
| rs62121100 | Brain_Hippocampus                     | 2 | RP11-1293J14.1 | 3500929 | rs62121098 | 1.0000 | 3092676 | G | C | 0.18 | 1.12E-05 | 1.76E-02 | 4.49E-02 |
| rs62121100 | Brain_Hippocampus                     | 2 | MYT1L          | 2063958 | rs62121099 | 1.0000 | 3092721 | C | T | 0.18 | 1.12E-05 | 3.72E-02 | 6.85E-02 |
| rs62121100 | Brain_Hippocampus                     | 2 | RP11-1293J14.1 | 3500929 | rs62121099 | 1.0000 | 3092721 | C | T | 0.18 | 1.12E-05 | 1.76E-02 | 4.49E-02 |
| rs62121100 | Brain_Hippocampus                     | 2 | MYT1L          | 2063958 | rs62121100 | 1.0000 | 3093952 | G | T | 0.18 | 8.44E-06 | 3.86E-02 | 6.86E-02 |
| rs62121100 | Brain_Hippocampus                     | 2 | RP11-1293J14.1 | 3500929 | rs62121100 | 1.0000 | 3093952 | G | T | 0.18 | 8.44E-06 | 1.11E-02 | 3.42E-02 |
| rs62121100 | Brain_Nucleus_accumbens_basal_ganglia | 2 | TSSC1-IT1      | 3303674 | rs62119802 | 0.9108 | 3065229 | C | T | 0.16 | 1.56E-05 | 1.86E-02 | 4.98E-02 |
| rs62121100 | Brain_Nucleus_accumbens_basal_ganglia | 2 | RP11-1293J14.1 | 3500929 | rs62119802 | 0.9108 | 3065229 | C | T | 0.16 | 1.56E-05 | 3.91E-02 | 7.45E-02 |
| rs62121100 | Brain_Nucleus_accumbens_basal_ganglia | 2 | TSSC1-IT1      | 3303674 | rs76133582 | 0.9189 | 3067000 | C | T | 0.16 | 1.56E-05 | 1.44E-02 | 4.40E-02 |
| rs62121100 | Brain_Nucleus_accumbens_basal_ganglia | 2 | RP11-1293J14.1 | 3500929 | rs76133582 | 0.9189 | 3067000 | C | T | 0.16 | 1.56E-05 | 4.55E-02 | 8.15E-02 |
| rs62121100 | Brain_Nucleus_accumbens_basal_ganglia | 2 | AC142528.1     | 3525007 | rs76133582 | 0.9189 | 3067000 | C | T | 0.16 | 1.56E-05 | 4.75E-02 | 8.36E-02 |
| rs62121100 | Brain_Nucleus_accumbens_basal_ganglia | 2 | TSSC1-IT1      | 3303674 | rs62119849 | 0.9431 | 3070219 | T | C | 0.17 | 2.89E-05 | 2.43E-02 | 5.79E-02 |
| rs62121100 | Brain_Nucleus_accumbens_basal_ganglia | 2 | AC142528.1     | 3525007 | rs62119849 | 0.9431 | 3070219 | T | C | 0.17 | 2.89E-05 | 3.10E-02 | 6.59E-02 |
| rs62121100 | Brain_Nucleus_accumbens_basal_ganglia | 2 | TSSC1-IT1      | 3303674 | rs80199046 | 0.9431 | 3070618 | C | T | 0.17 | 2.52E-05 | 4.52E-02 | 8.16E-02 |
| rs62121100 | Brain_Nucleus_accumbens_basal_ganglia | 2 | RP11-1293J14.1 | 3500929 | rs80199046 | 0.9431 | 3070618 | C | T | 0.17 | 2.52E-05 | 4.11E-02 | 7.72E-02 |
| rs62121100 | Brain_Nucleus_accumbens_basal_ganglia | 2 | AC142528.1     | 3525007 | rs80199046 | 0.9431 | 3070618 | C | T | 0.17 | 2.52E-05 | 3.32E-02 | 6.84E-02 |
| rs62121100 | Brain_Nucleus_accumbens_basal_ganglia | 2 | TSSC1-IT1      | 3303674 | rs62119850 | 0.9431 | 3070946 | C | G | 0.17 | 2.36E-05 | 2.43E-02 | 5.73E-02 |
| rs62121100 | Brain_Nucleus_accumbens_basal_ganglia | 2 | AC142528.1     | 3525007 | rs62119850 | 0.9431 | 3070946 | C | G | 0.17 | 2.36E-05 | 3.10E-02 | 6.53E-02 |
| rs62121100 | Brain_Nucleus_accumbens_basal_ganglia | 2 | TSSC1-IT1      | 3303674 | rs62119851 | 0.9431 | 3071496 | A | G | 0.17 | 2.36E-05 | 2.43E-02 | 5.73E-02 |
| rs62121100 | Brain_Nucleus_accumbens_basal_ganglia | 2 | AC142528.1     | 3525007 | rs62119851 | 0.9431 | 3071496 | A | G | 0.17 | 2.36E-05 | 3.10E-02 | 6.53E-02 |
| rs62121100 | Brain_Nucleus_accumbens_basal_ganglia | 2 | TSSC1-IT1      | 3303674 | rs62119853 | 0.9431 | 3075633 | T | C | 0.17 | 1.99E-05 | 2.43E-02 | 5.69E-02 |
| rs62121100 | Brain_Nucleus_accumbens_basal_ganglia | 2 | AC142528.1     | 3525007 | rs62119853 | 0.9431 | 3075633 | T | C | 0.17 | 1.99E-05 | 3.10E-02 | 6.49E-02 |
| rs62121100 | Brain_Nucleus_accumbens_basal_ganglia | 2 | TSSC1-IT1      | 3303674 | rs62119854 | 0.9431 | 3078552 | C | T | 0.17 | 2.13E-05 | 4.52E-02 | 8.11E-02 |
| rs62121100 | Brain_Nucleus_accumbens_basal_ganglia | 2 | RP11-1293J14.1 | 3500929 | rs62119854 | 0.9431 | 3078552 | C | T | 0.17 | 2.13E-05 | 4.11E-02 | 7.67E-02 |
| rs62121100 | Brain_Nucleus_accumbens_basal_ganglia | 2 | AC142528.1     | 3525007 | rs62119854 | 0.9431 | 3078552 | C | T | 0.17 | 2.13E-05 | 3.32E-02 | 6.79E-02 |
| rs62121100 | Brain_Nucleus_accumbens_basal_ganglia | 2 | TSSC1-IT1      | 3303674 | rs74933641 | 0.9431 | 3079764 | T | G | 0.17 | 2.38E-05 | 4.52E-02 | 8.18E-02 |
| rs62121100 | Brain_Nucleus_accumbens_basal_ganglia | 2 | RP11-1293J14.1 | 3500929 | rs74933641 | 0.9431 | 3079764 | T | G | 0.17 | 2.38E-05 | 4.11E-02 | 7.74E-02 |
| rs62121100 | Brain_Nucleus_accumbens_basal_ganglia | 2 | AC142528.1     | 3525007 | rs74933641 | 0.9431 | 3079764 | T | G | 0.17 | 2.38E-05 | 3.32E-02 | 6.86E-02 |

|            |                                       |   |                |         |            |        |         |   |   |      |          |          |          |
|------------|---------------------------------------|---|----------------|---------|------------|--------|---------|---|---|------|----------|----------|----------|
| rs62121100 | Brain_Nucleus_accumbens_basal_ganglia | 2 | TSSC1-IT1      | 3303674 | rs61654279 | 0.9431 | 3082049 | T | C | 0.17 | 2.53E-05 | 2.43E-02 | 5.85E-02 |
| rs62121100 | Brain_Nucleus_accumbens_basal_ganglia | 2 | AC142528.1     | 3525007 | rs61654279 | 0.9431 | 3082049 | T | C | 0.17 | 2.53E-05 | 3.10E-02 | 6.66E-02 |
| rs62121100 | Brain_Nucleus_accumbens_basal_ganglia | 2 | TSSC1-IT1      | 3303674 | rs62119857 | 0.9431 | 3082113 | C | G | 0.17 | 2.28E-05 | 2.43E-02 | 5.78E-02 |
| rs62121100 | Brain_Nucleus_accumbens_basal_ganglia | 2 | AC142528.1     | 3525007 | rs62119857 | 0.9431 | 3082113 | C | G | 0.17 | 2.28E-05 | 3.10E-02 | 6.59E-02 |
| rs62121100 | Brain_Nucleus_accumbens_basal_ganglia | 2 | TSSC1-IT1      | 3303674 | rs62119858 | 0.9269 | 3082691 | A | G | 0.17 | 4.35E-05 | 3.60E-02 | 7.58E-02 |
| rs62121100 | Brain_Nucleus_accumbens_basal_ganglia | 2 | TSSC1-IT1      | 3303674 | rs62119859 | 1.0000 | 3084061 | A | G | 0.18 | 9.91E-06 | 2.54E-02 | 5.42E-02 |
| rs62121100 | Brain_Nucleus_accumbens_basal_ganglia | 2 | AC142528.1     | 3525007 | rs62119859 | 1.0000 | 3084061 | A | G | 0.18 | 9.91E-06 | 1.45E-02 | 4.00E-02 |
| rs62121100 | Brain_Nucleus_accumbens_basal_ganglia | 2 | TSSC1-IT1      | 3303674 | rs75418685 | 1.0000 | 3084835 | T | C | 0.18 | 9.81E-06 | 2.43E-02 | 5.29E-02 |
| rs62121100 | Brain_Nucleus_accumbens_basal_ganglia | 2 | AC142528.1     | 3525007 | rs75418685 | 1.0000 | 3084835 | T | C | 0.18 | 9.81E-06 | 3.10E-02 | 6.09E-02 |
| rs62121100 | Brain_Nucleus_accumbens_basal_ganglia | 2 | TSSC1-IT1      | 3303674 | rs62121061 | 0.9919 | 3085094 | C | T | 0.18 | 1.75E-05 | 2.43E-02 | 5.59E-02 |
| rs62121100 | Brain_Nucleus_accumbens_basal_ganglia | 2 | AC142528.1     | 3525007 | rs62121061 | 0.9919 | 3085094 | C | T | 0.18 | 1.75E-05 | 3.10E-02 | 6.39E-02 |
| rs62121100 | Brain_Nucleus_accumbens_basal_ganglia | 2 | TSSC1-IT1      | 3303674 | rs62121062 | 0.9918 | 3087273 | C | T | 0.18 | 1.12E-05 | 3.08E-02 | 6.13E-02 |
| rs62121100 | Brain_Nucleus_accumbens_basal_ganglia | 2 | AC142528.1     | 3525007 | rs62121062 | 0.9918 | 3087273 | C | T | 0.18 | 1.12E-05 | 2.41E-02 | 5.33E-02 |
| rs62121100 | Brain_Nucleus_accumbens_basal_ganglia | 2 | TSSC1-IT1      | 3303674 | rs62121098 | 1.0000 | 3092676 | G | C | 0.18 | 1.12E-05 | 2.78E-02 | 5.77E-02 |
| rs62121100 | Brain_Nucleus_accumbens_basal_ganglia | 2 | RP11-1293J14.1 | 3500929 | rs62121098 | 1.0000 | 3092676 | G | C | 0.18 | 1.12E-05 | 4.76E-02 | 7.98E-02 |
| rs62121100 | Brain_Nucleus_accumbens_basal_ganglia | 2 | AC142528.1     | 3525007 | rs62121098 | 1.0000 | 3092676 | G | C | 0.18 | 1.12E-05 | 2.46E-02 | 5.38E-02 |
| rs62121100 | Brain_Nucleus_accumbens_basal_ganglia | 2 | TSSC1-IT1      | 3303674 | rs62121099 | 1.0000 | 3092721 | C | T | 0.18 | 1.12E-05 | 2.52E-02 | 5.46E-02 |
| rs62121100 | Brain_Nucleus_accumbens_basal_ganglia | 2 | AC142528.1     | 3525007 | rs62121099 | 1.0000 | 3092721 | C | T | 0.18 | 1.12E-05 | 3.75E-02 | 6.89E-02 |
| rs62121100 | Brain_Nucleus_accumbens_basal_ganglia | 2 | TSSC1-IT1      | 3303674 | rs62121100 | 1.0000 | 3093952 | G | T | 0.18 | 8.44E-06 | 1.98E-02 | 4.64E-02 |
| rs62121100 | Brain_Nucleus_accumbens_basal_ganglia | 2 | RP11-1293J14.1 | 3500929 | rs62121100 | 1.0000 | 3093952 | G | T | 0.18 | 8.44E-06 | 4.22E-02 | 7.26E-02 |
| rs62121100 | Brain_Nucleus_accumbens_basal_ganglia | 2 | AC142528.1     | 3525007 | rs62121100 | 1.0000 | 3093952 | G | T | 0.18 | 8.44E-06 | 3.56E-02 | 6.53E-02 |
| rs62121100 | Brain_Spinal_cord_cervical_c-1        | 2 | ALLC           | 3727979 | rs62119802 | 0.9108 | 3065229 | C | T | 0.16 | 1.56E-05 | 3.41E-02 | 6.89E-02 |
| rs62121100 | Brain_Spinal_cord_cervical_c-1        | 2 | ALLC           | 3727979 | rs76133582 | 0.9189 | 3067000 | C | T | 0.16 | 1.56E-05 | 3.58E-02 | 7.08E-02 |
| rs62121100 | Brain_Spinal_cord_cervical_c-1        | 2 | ALLC           | 3727979 | rs80199046 | 0.9431 | 3070618 | C | T | 0.17 | 2.52E-05 | 4.54E-02 | 8.19E-02 |
| rs62121100 | Brain_Spinal_cord_cervical_c-1        | 2 | ALLC           | 3727979 | rs62119854 | 0.9431 | 3078552 | C | T | 0.17 | 2.13E-05 | 4.54E-02 | 8.14E-02 |
| rs62121100 | Brain_Spinal_cord_cervical_c-1        | 2 | ALLC           | 3727979 | rs74933641 | 0.9431 | 3079764 | T | G | 0.17 | 2.38E-05 | 4.54E-02 | 8.21E-02 |
| rs62121100 | Brain_Spinal_cord_cervical_c-1        | 2 | ALLC           | 3727979 | rs62119858 | 0.9269 | 3082691 | A | G | 0.17 | 4.35E-05 | 4.54E-02 | 8.62E-02 |
| rs62121100 | Brain_Spinal_cord_cervical_c-1        | 2 | AC142528.1     | 3525007 | rs62121100 | 1.0000 | 3093952 | G | T | 0.18 | 8.44E-06 | 3.75E-02 | 6.74E-02 |
| rs62121100 | Brain_Substantia_nigra                | 2 | TMSB4XP2       | 3665242 | rs62119802 | 0.9108 | 3065229 | C | T | 0.16 | 1.56E-05 | 2.47E-02 | 5.77E-02 |
| rs62121100 | Brain_Substantia_nigra                | 2 | TMSB4XP2       | 3665242 | rs76133582 | 0.9189 | 3067000 | C | T | 0.16 | 1.56E-05 | 3.84E-02 | 7.37E-02 |
| rs62121100 | Brain_Substantia_nigra                | 2 | TMSB4XP2       | 3665242 | rs62119849 | 0.9431 | 3070219 | T | C | 0.17 | 2.89E-05 | 2.47E-02 | 5.83E-02 |
| rs62121100 | Brain_Substantia_nigra                | 2 | AC108488.3     | 3607765 | rs80199046 | 0.9431 | 3070618 | C | T | 0.17 | 2.52E-05 | 3.30E-02 | 6.81E-02 |
| rs62121100 | Brain_Substantia_nigra                | 2 | TMSB4XP2       | 3665242 | rs62119850 | 0.9431 | 3070946 | C | G | 0.17 | 2.36E-05 | 2.47E-02 | 5.78E-02 |
| rs62121100 | Brain_Substantia_nigra                | 2 | TMSB4XP2       | 3665242 | rs62119851 | 0.9431 | 3071496 | A | G | 0.17 | 2.36E-05 | 2.47E-02 | 5.78E-02 |
| rs62121100 | Brain_Substantia_nigra                | 2 | TMSB4XP2       | 3665242 | rs62119853 | 0.9431 | 3075633 | T | C | 0.17 | 1.99E-05 | 2.47E-02 | 5.73E-02 |
| rs62121100 | Brain_Substantia_nigra                | 2 | AC108488.3     | 3607765 | rs62119854 | 0.9431 | 3078552 | C | T | 0.17 | 2.13E-05 | 3.30E-02 | 6.76E-02 |
| rs62121100 | Brain_Substantia_nigra                | 2 | AC108488.3     | 3607765 | rs74933641 | 0.9431 | 3079764 | T | G | 0.17 | 2.38E-05 | 3.30E-02 | 6.83E-02 |
| rs62121100 | Brain_Substantia_nigra                | 2 | AC142528.1     | 3525007 | rs61654279 | 0.9431 | 3082049 | T | C | 0.17 | 2.53E-05 | 3.75E-02 | 7.40E-02 |
| rs62121100 | Brain_Substantia_nigra                | 2 | TMSB4XP2       | 3665242 | rs61654279 | 0.9431 | 3082049 | T | C | 0.17 | 2.53E-05 | 3.00E-02 | 6.54E-02 |
| rs62121100 | Brain_Substantia_nigra                | 2 | AC142528.1     | 3525007 | rs62119857 | 0.9431 | 3082113 | C | G | 0.17 | 2.28E-05 | 3.75E-02 | 7.33E-02 |

|            |                                      |   |               |          |            |        |          |   |   |      |          |          |          |
|------------|--------------------------------------|---|---------------|----------|------------|--------|----------|---|---|------|----------|----------|----------|
| rs62121100 | Brain_Substantia_nigra               | 2 | TMSB4XP2      | 3665242  | rs62119857 | 0.9431 | 3082113  | C | G | 0.17 | 2.28E-05 | 3.00E-02 | 6.47E-02 |
| rs62121100 | Brain_Substantia_nigra               | 2 | TMSB4XP2      | 3665242  | rs62119859 | 1.0000 | 3084061  | A | G | 0.18 | 9.91E-06 | 1.73E-02 | 4.39E-02 |
| rs62121100 | Brain_Substantia_nigra               | 2 | TMSB4XP2      | 3665242  | rs75418685 | 1.0000 | 3084835  | T | C | 0.18 | 9.81E-06 | 2.47E-02 | 5.34E-02 |
| rs62121100 | Brain_Substantia_nigra               | 2 | TMSB4XP2      | 3665242  | rs62121061 | 0.9919 | 3085094  | C | T | 0.18 | 1.75E-05 | 2.47E-02 | 5.64E-02 |
| rs62121100 | Brain_Substantia_nigra               | 2 | TMSB4XP2      | 3665242  | rs62121062 | 0.9918 | 3087273  | C | T | 0.18 | 1.12E-05 | 2.35E-02 | 5.26E-02 |
| rs62121100 | Brain_Substantia_nigra               | 2 | TMSB4XP2      | 3665242  | rs62121098 | 1.0000 | 3092676  | G | C | 0.18 | 1.12E-05 | 1.77E-02 | 4.50E-02 |
| rs62121100 | Brain_Substantia_nigra               | 2 | TMSB4XP2      | 3665242  | rs62121099 | 1.0000 | 3092721  | C | T | 0.18 | 1.12E-05 | 2.47E-02 | 5.40E-02 |
| rs62121100 | Brain_Substantia_nigra               | 2 | TMSB4XP2      | 3665242  | rs62121100 | 1.0000 | 3093952  | G | T | 0.18 | 8.44E-06 | 2.51E-02 | 5.30E-02 |
| rs1809136  | Brain_Amygdala                       | 2 | NOL10         | 10770496 | rs1809136  | 1.0000 | 11152180 | C | G | 0.93 | 9.99E-06 | 1.71E-02 | 3.85E-02 |
| rs1809136  | Brain_Amygdala                       | 2 | RP11-791G15.2 | 10909092 | rs1809136  | 1.0000 | 11152180 | C | G | 0.93 | 9.99E-06 | 2.43E-02 | 4.75E-02 |
| rs1809136  | Brain_Amygdala                       | 2 | PDIA6         | 10952755 | rs1809136  | 1.0000 | 11152180 | C | G | 0.93 | 9.99E-06 | 4.29E-02 | 6.86E-02 |
| rs1809136  | Brain_Amygdala                       | 2 | E2F6          | 11595399 | rs1809136  | 1.0000 | 11152180 | C | G | 0.93 | 9.99E-06 | 6.29E-04 | 8.21E-03 |
| rs1809136  | Brain_Amygdala                       | 2 | GREB1         | 11728578 | rs1809136  | 1.0000 | 11152180 | C | G | 0.93 | 9.99E-06 | 1.31E-02 | 3.31E-02 |
| rs1809136  | Brain_Amygdala                       | 2 | NOL10         | 10770496 | rs4669673  | 0.9361 | 11153383 | A | T | 0.93 | 4.17E-05 | 3.23E-03 | 2.05E-02 |
| rs1809136  | Brain_Amygdala                       | 2 | RP11-791G15.2 | 10909092 | rs4669673  | 0.9361 | 11153383 | A | T | 0.93 | 4.17E-05 | 1.32E-02 | 3.87E-02 |
| rs1809136  | Brain_Amygdala                       | 2 | PDIA6         | 10952755 | rs4669673  | 0.9361 | 11153383 | A | T | 0.93 | 4.17E-05 | 3.24E-02 | 6.31E-02 |
| rs1809136  | Brain_Amygdala                       | 2 | E2F6          | 11595399 | rs4669673  | 0.9361 | 11153383 | A | T | 0.93 | 4.17E-05 | 1.77E-02 | 4.49E-02 |
| rs1809136  | Brain_Amygdala                       | 2 | GREB1         | 11728578 | rs4669673  | 0.9361 | 11153383 | A | T | 0.93 | 4.17E-05 | 4.08E-02 | 7.24E-02 |
| rs1809136  | Brain_Amygdala                       | 2 | NOL10         | 10770496 | rs4669674  | 0.9361 | 11153805 | A | G | 0.93 | 4.06E-05 | 3.23E-03 | 2.04E-02 |
| rs1809136  | Brain_Amygdala                       | 2 | RP11-791G15.2 | 10909092 | rs4669674  | 0.9361 | 11153805 | A | G | 0.93 | 4.06E-05 | 1.32E-02 | 3.85E-02 |
| rs1809136  | Brain_Amygdala                       | 2 | PDIA6         | 10952755 | rs4669674  | 0.9361 | 11153805 | A | G | 0.93 | 4.06E-05 | 3.24E-02 | 6.29E-02 |
| rs1809136  | Brain_Amygdala                       | 2 | E2F6          | 11595399 | rs4669674  | 0.9361 | 11153805 | A | G | 0.93 | 4.06E-05 | 1.77E-02 | 4.48E-02 |
| rs1809136  | Brain_Amygdala                       | 2 | GREB1         | 11728578 | rs4669674  | 0.9361 | 11153805 | A | G | 0.93 | 4.06E-05 | 4.08E-02 | 7.23E-02 |
| rs1809136  | Brain_Amygdala                       | 2 | NOL10         | 10770496 | rs6432163  | 0.9361 | 11159080 | C | A | 0.93 | 4.88E-05 | 3.23E-03 | 2.12E-02 |
| rs1809136  | Brain_Amygdala                       | 2 | RP11-791G15.2 | 10909092 | rs6432163  | 0.9361 | 11159080 | C | A | 0.93 | 4.88E-05 | 1.32E-02 | 3.95E-02 |
| rs1809136  | Brain_Amygdala                       | 2 | PDIA6         | 10952755 | rs6432163  | 0.9361 | 11159080 | C | A | 0.93 | 4.88E-05 | 3.24E-02 | 6.40E-02 |
| rs1809136  | Brain_Amygdala                       | 2 | E2F6          | 11595399 | rs6432163  | 0.9361 | 11159080 | C | A | 0.93 | 4.88E-05 | 1.77E-02 | 4.58E-02 |
| rs1809136  | Brain_Amygdala                       | 2 | GREB1         | 11728578 | rs6432163  | 0.9361 | 11159080 | C | A | 0.93 | 4.88E-05 | 4.08E-02 | 7.34E-02 |
| rs1809136  | Brain_Anterior_cingulate_cortex_BA24 | 2 | KLF11         | 10188761 | rs4669673  | 0.9361 | 11153383 | A | T | 0.93 | 4.17E-05 | 4.16E-02 | 7.33E-02 |
| rs1809136  | Brain_Anterior_cingulate_cortex_BA24 | 2 | PQLC3         | 11307162 | rs4669673  | 0.9361 | 11153383 | A | T | 0.93 | 4.17E-05 | 2.78E-02 | 5.77E-02 |
| rs1809136  | Brain_Anterior_cingulate_cortex_BA24 | 2 | KLF11         | 10188761 | rs4669674  | 0.9361 | 11153805 | A | G | 0.93 | 4.06E-05 | 4.16E-02 | 7.31E-02 |
| rs1809136  | Brain_Anterior_cingulate_cortex_BA24 | 2 | PQLC3         | 11307162 | rs4669674  | 0.9361 | 11153805 | A | G | 0.93 | 4.06E-05 | 2.78E-02 | 5.76E-02 |
| rs1809136  | Brain_Anterior_cingulate_cortex_BA24 | 2 | KLF11         | 10188761 | rs6432163  | 0.9361 | 11159080 | C | A | 0.93 | 4.88E-05 | 4.16E-02 | 7.42E-02 |
| rs1809136  | Brain_Anterior_cingulate_cortex_BA24 | 2 | PQLC3         | 11307162 | rs6432163  | 0.9361 | 11159080 | C | A | 0.93 | 4.88E-05 | 2.78E-02 | 5.87E-02 |
| rs1809136  | Brain_Caudate_basal_ganglia          | 2 | RN7SL832P     | 10831347 | rs1809136  | 1.0000 | 11152180 | C | G | 0.93 | 9.99E-06 | 1.66E-02 | 3.78E-02 |
| rs1809136  | Brain_Caudate_basal_ganglia          | 2 | RRM2          | 10267000 | rs4669673  | 0.9361 | 11153383 | A | T | 0.93 | 4.17E-05 | 5.00E-02 | 8.23E-02 |
| rs1809136  | Brain_Caudate_basal_ganglia          | 2 | RN7SL832P     | 10831347 | rs4669673  | 0.9361 | 11153383 | A | T | 0.93 | 4.17E-05 | 1.74E-02 | 4.46E-02 |
| rs1809136  | Brain_Caudate_basal_ganglia          | 2 | RRM2          | 10267000 | rs4669674  | 0.9361 | 11153805 | A | G | 0.93 | 4.06E-05 | 5.00E-02 | 8.21E-02 |
| rs1809136  | Brain_Caudate_basal_ganglia          | 2 | RN7SL832P     | 10831347 | rs4669674  | 0.9361 | 11153805 | A | G | 0.93 | 4.06E-05 | 1.74E-02 | 4.45E-02 |
| rs1809136  | Brain_Caudate_basal_ganglia          | 2 | RRM2          | 10267000 | rs6432163  | 0.9361 | 11159080 | C | A | 0.93 | 4.88E-05 | 5.00E-02 | 8.32E-02 |



|           |                             |   |                     |          |           |        |          |   |   |      |          |          |          |
|-----------|-----------------------------|---|---------------------|----------|-----------|--------|----------|---|---|------|----------|----------|----------|
| rs1809136 | Brain_Caudate_basal_ganglia | 2 | <i>RN7SL832P</i>    | 10831347 | rs6432163 | 0.9361 | 11159080 | C | A | 0.93 | 4.88E-05 | 1.74E-02 | 4.55E-02 |
| rs1809136 | Brain_Cerebellar_Hemisphere | 2 | <i>RP11-254F7.2</i> | 10180004 | rs1809136 | 1.0000 | 11152180 | C | G | 0.93 | 9.99E-06 | 3.36E-03 | 1.65E-02 |
| rs1809136 | Brain_Cerebellar_Hemisphere | 2 | <i>C2orf50</i>      | 11280047 | rs1809136 | 1.0000 | 11152180 | C | G | 0.93 | 9.99E-06 | 1.71E-02 | 3.85E-02 |
| rs1809136 | Brain_Cerebellar_Hemisphere | 2 | <i>RP11-254F7.2</i> | 10180004 | rs4669673 | 0.9361 | 11153383 | A | T | 0.93 | 4.17E-05 | 1.71E-03 | 1.61E-02 |
| rs1809136 | Brain_Cerebellar_Hemisphere | 2 | <i>RP11-254F7.2</i> | 10180004 | rs4669674 | 0.9361 | 11153805 | A | G | 0.93 | 4.06E-05 | 1.71E-03 | 1.60E-02 |
| rs1809136 | Brain_Cerebellar_Hemisphere | 2 | <i>RP11-254F7.2</i> | 10180004 | rs6432163 | 0.9361 | 11159080 | C | A | 0.93 | 4.88E-05 | 1.71E-03 | 1.67E-02 |
| rs1809136 | Brain_Cerebellum            | 2 | <i>ROCK2</i>        | 11404171 | rs4669673 | 0.9361 | 11153383 | A | T | 0.93 | 4.17E-05 | 4.84E-02 | 8.06E-02 |
| rs1809136 | Brain_Cerebellum            | 2 | <i>ROCK2</i>        | 11404171 | rs4669674 | 0.9361 | 11153805 | A | G | 0.93 | 4.06E-05 | 4.84E-02 | 8.04E-02 |
| rs1809136 | Brain_Cerebellum            | 2 | <i>ROCK2</i>        | 11404171 | rs6432163 | 0.9361 | 11159080 | C | A | 0.93 | 4.88E-05 | 4.84E-02 | 8.15E-02 |
| rs1809136 | Brain_Cortex                | 2 | <i>AC007249.3</i>   | 10594061 | rs1809136 | 1.0000 | 11152180 | C | G | 0.93 | 9.99E-06 | 3.75E-02 | 6.27E-02 |
| rs1809136 | Brain_Cortex                | 2 | <i>ROCK2</i>        | 11404171 | rs1809136 | 1.0000 | 11152180 | C | G | 0.93 | 9.99E-06 | 8.31E-03 | 2.58E-02 |
| rs1809136 | Brain_Cortex                | 2 | <i>ROCK2</i>        | 11404171 | rs4669673 | 0.9361 | 11153383 | A | T | 0.93 | 4.17E-05 | 1.20E-02 | 3.68E-02 |
| rs1809136 | Brain_Cortex                | 2 | <i>ROCK2</i>        | 11404171 | rs4669674 | 0.9361 | 11153805 | A | G | 0.93 | 4.06E-05 | 1.20E-02 | 3.67E-02 |
| rs1809136 | Brain_Cortex                | 2 | <i>ROCK2</i>        | 11404171 | rs6432163 | 0.9361 | 11159080 | C | A | 0.93 | 4.88E-05 | 1.20E-02 | 3.77E-02 |
| rs1809136 | Brain_Frontal_Cortex_BA9    | 2 | <i>ATP6V1C2</i>     | 10893505 | rs1809136 | 1.0000 | 11152180 | C | G | 0.93 | 9.99E-06 | 1.64E-02 | 3.75E-02 |
| rs1809136 | Brain_Frontal_Cortex_BA9    | 2 | <i>ODC1</i>         | 10584362 | rs4669673 | 0.9361 | 11153383 | A | T | 0.93 | 4.17E-05 | 1.23E-02 | 3.72E-02 |
| rs1809136 | Brain_Frontal_Cortex_BA9    | 2 | <i>ATP6V1C2</i>     | 10893505 | rs4669673 | 0.9361 | 11153383 | A | T | 0.93 | 4.17E-05 | 4.61E-02 | 7.82E-02 |
| rs1809136 | Brain_Frontal_Cortex_BA9    | 2 | <i>C2orf50</i>      | 11280047 | rs4669673 | 0.9361 | 11153383 | A | T | 0.93 | 4.17E-05 | 2.39E-02 | 5.29E-02 |
| rs1809136 | Brain_Frontal_Cortex_BA9    | 2 | <i>LPIN1</i>        | 11892628 | rs4669673 | 0.9361 | 11153383 | A | T | 0.93 | 4.17E-05 | 4.51E-02 | 7.71E-02 |
| rs1809136 | Brain_Frontal_Cortex_BA9    | 2 | <i>ODC1</i>         | 10584362 | rs4669674 | 0.9361 | 11153805 | A | G | 0.93 | 4.06E-05 | 1.23E-02 | 3.71E-02 |
| rs1809136 | Brain_Frontal_Cortex_BA9    | 2 | <i>ATP6V1C2</i>     | 10893505 | rs4669674 | 0.9361 | 11153805 | A | G | 0.93 | 4.06E-05 | 4.61E-02 | 7.81E-02 |
| rs1809136 | Brain_Frontal_Cortex_BA9    | 2 | <i>C2orf50</i>      | 11280047 | rs4669674 | 0.9361 | 11153805 | A | G | 0.93 | 4.06E-05 | 2.39E-02 | 5.28E-02 |
| rs1809136 | Brain_Frontal_Cortex_BA9    | 2 | <i>LPIN1</i>        | 11892628 | rs4669674 | 0.9361 | 11153805 | A | G | 0.93 | 4.06E-05 | 4.51E-02 | 7.70E-02 |
| rs1809136 | Brain_Frontal_Cortex_BA9    | 2 | <i>ODC1</i>         | 10584362 | rs6432163 | 0.9361 | 11159080 | C | A | 0.93 | 4.88E-05 | 1.23E-02 | 3.81E-02 |
| rs1809136 | Brain_Frontal_Cortex_BA9    | 2 | <i>ATP6V1C2</i>     | 10893505 | rs6432163 | 0.9361 | 11159080 | C | A | 0.93 | 4.88E-05 | 4.61E-02 | 7.92E-02 |
| rs1809136 | Brain_Frontal_Cortex_BA9    | 2 | <i>C2orf50</i>      | 11280047 | rs6432163 | 0.9361 | 11159080 | C | A | 0.93 | 4.88E-05 | 2.39E-02 | 5.38E-02 |
| rs1809136 | Brain_Frontal_Cortex_BA9    | 2 | <i>LPIN1</i>        | 11892628 | rs6432163 | 0.9361 | 11159080 | C | A | 0.93 | 4.88E-05 | 4.51E-02 | 7.81E-02 |
| rs1809136 | Brain_Hippocampus           | 2 | <i>CYS1</i>         | 10208989 | rs1809136 | 1.0000 | 11152180 | C | G | 0.93 | 9.99E-06 | 2.82E-02 | 5.21E-02 |
| rs1809136 | Brain_Hippocampus           | 2 | <i>ROCK2</i>        | 11404171 | rs1809136 | 1.0000 | 11152180 | C | G | 0.93 | 9.99E-06 | 3.30E-02 | 5.77E-02 |
| rs1809136 | Brain_Hippocampus           | 2 | <i>NTSR2</i>        | 11804297 | rs1809136 | 1.0000 | 11152180 | C | G | 0.93 | 9.99E-06 | 2.92E-03 | 1.54E-02 |
| rs1809136 | Brain_Hippocampus           | 2 | <i>CYS1</i>         | 10208989 | rs4669673 | 0.9361 | 11153383 | A | T | 0.93 | 4.17E-05 | 3.33E-02 | 6.41E-02 |
| rs1809136 | Brain_Hippocampus           | 2 | <i>AC007249.3</i>   | 10594061 | rs4669673 | 0.9361 | 11153383 | A | T | 0.93 | 4.17E-05 | 2.85E-02 | 5.85E-02 |
| rs1809136 | Brain_Hippocampus           | 2 | <i>NTSR2</i>        | 11804297 | rs4669673 | 0.9361 | 11153383 | A | T | 0.93 | 4.17E-05 | 4.94E-02 | 8.17E-02 |
| rs1809136 | Brain_Hippocampus           | 2 | <i>CYS1</i>         | 10208989 | rs4669674 | 0.9361 | 11153805 | A | G | 0.93 | 4.06E-05 | 3.33E-02 | 6.39E-02 |
| rs1809136 | Brain_Hippocampus           | 2 | <i>AC007249.3</i>   | 10594061 | rs4669674 | 0.9361 | 11153805 | A | G | 0.93 | 4.06E-05 | 2.85E-02 | 5.84E-02 |
| rs1809136 | Brain_Hippocampus           | 2 | <i>NTSR2</i>        | 11804297 | rs4669674 | 0.9361 | 11153805 | A | G | 0.93 | 4.06E-05 | 4.94E-02 | 8.16E-02 |
| rs1809136 | Brain_Hippocampus           | 2 | <i>CYS1</i>         | 10208989 | rs6432163 | 0.9361 | 11159080 | C | A | 0.93 | 4.88E-05 | 3.33E-02 | 6.50E-02 |
| rs1809136 | Brain_Hippocampus           | 2 | <i>AC007249.3</i>   | 10594061 | rs6432163 | 0.9361 | 11159080 | C | A | 0.93 | 4.88E-05 | 2.85E-02 | 5.94E-02 |
| rs1809136 | Brain_Hippocampus           | 2 | <i>NTSR2</i>        | 11804297 | rs6432163 | 0.9361 | 11159080 | C | A | 0.93 | 4.88E-05 | 4.94E-02 | 8.26E-02 |
| rs1809136 | Brain_Hypothalamus          | 2 | <i>ATP6V1C2</i>     | 10893505 | rs1809136 | 1.0000 | 11152180 | C | G | 0.93 | 9.99E-06 | 4.93E-02 | 7.54E-02 |

|           |                                       |   |                      |          |           |        |          |   |   |      |          |          |          |
|-----------|---------------------------------------|---|----------------------|----------|-----------|--------|----------|---|---|------|----------|----------|----------|
| rs1809136 | Brain_Hypothalamus                    | 2 | <i>RP11-320M2.1</i>  | 10590136 | rs4669673 | 0.9361 | 11153383 | A | T | 0.93 | 4.17E-05 | 4.36E-02 | 7.55E-02 |
| rs1809136 | Brain_Hypothalamus                    | 2 | <i>ATP6V1C2</i>      | 10893505 | rs4669673 | 0.9361 | 11153383 | A | T | 0.93 | 4.17E-05 | 1.97E-02 | 4.75E-02 |
| rs1809136 | Brain_Hypothalamus                    | 2 | <i>RP11-320M2.1</i>  | 10590136 | rs4669674 | 0.9361 | 11153805 | A | G | 0.93 | 4.06E-05 | 4.36E-02 | 7.54E-02 |
| rs1809136 | Brain_Hypothalamus                    | 2 | <i>ATP6V1C2</i>      | 10893505 | rs4669674 | 0.9361 | 11153805 | A | G | 0.93 | 4.06E-05 | 1.97E-02 | 4.74E-02 |
| rs1809136 | Brain_Hypothalamus                    | 2 | <i>RP11-320M2.1</i>  | 10590136 | rs6432163 | 0.9361 | 11159080 | C | A | 0.93 | 4.88E-05 | 4.36E-02 | 7.64E-02 |
| rs1809136 | Brain_Hypothalamus                    | 2 | <i>ATP6V1C2</i>      | 10893505 | rs6432163 | 0.9361 | 11159080 | C | A | 0.93 | 4.88E-05 | 1.97E-02 | 4.84E-02 |
| rs1809136 | Brain_Nucleus_accumbens_basal_ganglia | 2 | <i>RN7SL832P</i>     | 10831347 | rs4669673 | 0.9361 | 11153383 | A | T | 0.93 | 4.17E-05 | 4.65E-02 | 7.86E-02 |
| rs1809136 | Brain_Nucleus_accumbens_basal_ganglia | 2 | <i>RN7SL832P</i>     | 10831347 | rs4669674 | 0.9361 | 11153805 | A | G | 0.93 | 4.06E-05 | 4.65E-02 | 7.85E-02 |
| rs1809136 | Brain_Nucleus_accumbens_basal_ganglia | 2 | <i>RN7SL832P</i>     | 10831347 | rs6432163 | 0.9361 | 11159080 | C | A | 0.93 | 4.88E-05 | 4.65E-02 | 7.96E-02 |
| rs1809136 | Brain_Putamen_basal_ganglia           | 2 | <i>KCNF1</i>         | 11053206 | rs1809136 | 1.0000 | 11152180 | C | G | 0.93 | 9.99E-06 | 2.97E-02 | 5.39E-02 |
| rs1809136 | Brain_Putamen_basal_ganglia           | 2 | <i>NTSR2</i>         | 11804297 | rs1809136 | 1.0000 | 11152180 | C | G | 0.93 | 9.99E-06 | 1.50E-02 | 3.56E-02 |
| rs1809136 | Brain_Putamen_basal_ganglia           | 2 | <i>NTSR2</i>         | 11804297 | rs4669673 | 0.9361 | 11153383 | A | T | 0.93 | 4.17E-05 | 2.01E-02 | 4.82E-02 |
| rs1809136 | Brain_Putamen_basal_ganglia           | 2 | <i>NTSR2</i>         | 11804297 | rs4669674 | 0.9361 | 11153805 | A | G | 0.93 | 4.06E-05 | 2.01E-02 | 4.80E-02 |
| rs1809136 | Brain_Putamen_basal_ganglia           | 2 | <i>NTSR2</i>         | 11804297 | rs6432163 | 0.9361 | 11159080 | C | A | 0.93 | 4.88E-05 | 2.01E-02 | 4.91E-02 |
| rs1809136 | Brain_Spinal_cord_cervical_c-1        | 2 | <i>RRM2</i>          | 10267000 | rs1809136 | 1.0000 | 11152180 | C | G | 0.93 | 9.99E-06 | 2.32E-02 | 4.62E-02 |
| rs1809136 | Brain_Substantia_nigra                | 2 | <i>ATP6V1C2</i>      | 10893505 | rs1809136 | 1.0000 | 11152180 | C | G | 0.93 | 9.99E-06 | 2.13E-02 | 4.38E-02 |
| rs1809136 | Brain_Substantia_nigra                | 2 | <i>RRM2</i>          | 10267000 | rs4669673 | 0.9361 | 11153383 | A | T | 0.93 | 4.17E-05 | 3.32E-02 | 6.40E-02 |
| rs1809136 | Brain_Substantia_nigra                | 2 | <i>ATP6V1C2</i>      | 10893505 | rs4669673 | 0.9361 | 11153383 | A | T | 0.93 | 4.17E-05 | 6.35E-03 | 2.73E-02 |
| rs1809136 | Brain_Substantia_nigra                | 2 | <i>RRM2</i>          | 10267000 | rs4669674 | 0.9361 | 11153805 | A | G | 0.93 | 4.06E-05 | 3.32E-02 | 6.39E-02 |
| rs1809136 | Brain_Substantia_nigra                | 2 | <i>ATP6V1C2</i>      | 10893505 | rs4669674 | 0.9361 | 11153805 | A | G | 0.93 | 4.06E-05 | 6.35E-03 | 2.72E-02 |
| rs1809136 | Brain_Substantia_nigra                | 2 | <i>RRM2</i>          | 10267000 | rs6432163 | 0.9361 | 11159080 | C | A | 0.93 | 4.88E-05 | 3.32E-02 | 6.49E-02 |
| rs1809136 | Brain_Substantia_nigra                | 2 | <i>ATP6V1C2</i>      | 10893505 | rs6432163 | 0.9361 | 11159080 | C | A | 0.93 | 4.88E-05 | 6.35E-03 | 2.80E-02 |
| rs1809136 | Whole_Blood                           | 2 | <i>RP11-245G13.2</i> | 11021819 | rs1809136 | 1.0000 | 11152180 | C | G | 0.93 | 9.99E-06 | 5.78E-03 | 2.14E-02 |
| rs1809136 | Whole_Blood                           | 2 | <i>RP11-254F7.2</i>  | 10180004 | rs4669673 | 0.9361 | 11153383 | A | T | 0.93 | 4.17E-05 | 4.17E-02 | 7.34E-02 |
| rs1809136 | Whole_Blood                           | 2 | <i>RP11-254F7.2</i>  | 10180004 | rs4669674 | 0.9361 | 11153805 | A | G | 0.93 | 4.06E-05 | 4.17E-02 | 7.33E-02 |
| rs1809136 | Whole_Blood                           | 2 | <i>RP11-254F7.2</i>  | 10180004 | rs6432163 | 0.9361 | 11159080 | C | A | 0.93 | 4.88E-05 | 4.17E-02 | 7.43E-02 |
